# Supplementary material for: tRNA Gene Identity Affects Nuclear Positioning
Source: PLoS One. 2011 Dec 19;6(12):e29267. doi: 10.1371/journal.pone.0029267 (PMC3242769; doi:10.1371/journal.pone.0029267)
Supplement: Data S1 — Comparison of interactions for wild-type and yDP77 strains. Topography v1.19 program output for the high throughput sequencing of the 4C PCR product. The complete data set is presented along with tabs in which interactions have been classified according to the feature present on the partner sequence (i.e. tRNA, autonomous replicating sequences [ARS], YSCPLASM [2 micron plasmid], ribosomal DNA, Telomeres). The read-me tab explains file specific variations and presents a diagram of the fragments that were analysed to determine the interaction patterns. (XLSX) [file pone.0029267.s006.xlsx]

## Sheet: read-me
READ_ME
Circular Chromosome Conformation Capture (4C) has been performed on an MspI restriction fragment containing the tL(UAA)B2 tRNA (Chr II 347,603 – 347,686 bp) in a wildtype S. cerevisiae strain (yPH499) and also a mutant (yDP77) which has had the tRNA replaced with a SUP4-1 gene. This spreadsheet contains the Topography v1.19 program output for the high throughput sequencing of the 4C PCR product. …						The data in this file consists of comparisons of the yPH499 and yDP77 datasets. The unique data was able to be mapped to a single restriction fragment. The repetitive data consists of a combination of the unique data and also fragments that were mapped to more than one restriction fragment.
The bait fragment details are:	Bait fragment	Chromosome	start	stop
	721	NC_001134	347518	349584
Read me: identical colours indicate that elements share at least one sequence. Therefore, unless sequences mapped to the unique end of the MspI fragment interactions could be due to mis-alignment and cannot be assigned to any one particular fragment rather only a fragment grouping to a particular gene family/repetitive unit. In order to generate these files in which the unique and repetitive and …
Glossary	Unique
	Uniquely mapping means that the 4C PCR product sequence tag aligned uniquely against the reference genome.
	Repetitive
	The data in the Repetitive column is from the "data combined; .datcomb" file meaning it contains 4C PCR product sequence tags which did not align uniquely against the reference genome and those that did. The difference between the unique and repetitive numbers is the actual number of interactions which mapped against repetitive elements.
	Adjacent
	Adjacent interactions arise when the MspI fragments adjacent to the 4C bait fragment are captured during the 4C methodology. These can arise for a number of reasons, chief among these is that the MspI sites flanking the Bait fragment are not cleaved during the restriction digestion step of the 4C protocol.
	Self
	Self interactions arise when the 4C bait MspI fragment circularises. This results in a 4C PCR which amplifies across the ligated MspI junction, which is sequenced is reported as the bait fragment interacting with the bait fragment (721-721).
	Fragment
	Fragment refers to an MspI segment. They are artbitarily numbered by artifically joining chromosomes 1 to 16 (and Mitochondrial genome, 2micron plasmid [YSCPLASM]) end to end and numbering (starting at 0) from the beginnning of chromosome 1. Crucially, MspI fragments can not span across chromosomes.
	Counts/Interaction Frequency
	The number of sequence tags which aligned to a particular MspI fragment. In the case of interactions which are mapped to repetitive elements, or align in more than one region fo the genomeIt is generally accepted that the interaction frequency will be split evenly between the
	Annotation
	Annotations are derived from GenBank files from NCBI and are automatically inserted by the Topography program.
	Corrected interaction counts
	These interaction frequencies have been corrected or normalised using the adjacent interaction data, that is, the number of sequences which were obtained that crossed into the adjacent MspI fragment. This is an indication of the amount of sequencing which was obtained for each sample and provides a figure to normalise against. The correction takes place in the "adjacent and self" tab.

## Sheet: yPH499-yDP77_dat_and_datcomb
This spreadsheet contains the output from the Topography program, it lists all of the interactions which were detected for the wildtype strain, yPH499, and the yDP77 mutant, each with the 721 bait fragment. The data is split into two categories by the Topography program, either the 4C product sequence tag aligned uniquely upon the genome, or it aligned against a repetitive element. The column lab…
		Counts/Interaction Frequency
Interacting fragments		yPH499		yDP77		Fragment 1 coordinates			Fragment 2 coordinates			Annotation		Sequence		Fragment 2
Fragment 1	Fragment 2	yPH499 unique	yPH499 repetitive	yDP77 unique	yDP77 repetitive	Chromosome	start	stop	Chromosome	start	stop	Fragment 1	Fragment 2	Fragment 1	Fragment 2	First 15bp	Last 15bp
17	721	0	1	0	0	NC_001133	24167	25495	NC_001134	347518	349584	|gene gene= FLO9 |CDS[fcd=3138](-,24001,27969) gene= FLO9 note= Flo9p;	|gene |tRNA note= GO_component: cytosol [goid 0005829] [evidence NAS] |gene |CDS[fcd=-674](+,347877,349382) note= Ybr056wp;	CGGAACTTGTTAGACTCTTGGTGTTGCCAGTTTCGGATACAGAAACAACACTACTGCTGTGACCAATCACATCGGTCGCGGAAGCCGTCTGTGTTTCAGCATGATTGAATCTTGAAATTGAAGAGGTGACTACTGTTTTCGTCTCAGCAGCTCCAGTACTGGTAGTTGTCTCAGCAGCTCCAGTATTGGTTGTTGTCTCACTGGTAGCACTGTTCATTTTAGAGCTGACAGACTGTTCATTCGTAGTCTGTGGCCTCCATGTAGAATAGACCGTAACAACATCATTCACAGTAGCCGTGGCCGTCGAAACAATGGCAGGTGAAGTAGTTTCGGAACACACACCAGATCCGCAGGAAGTAACAGTAACTAGCGTAGTTTGTTGCTTCGATTCTGTGGTGG…	CGGAGGAGCTACTAAAGAAAGAGTGCTGCAATTAATACAATTAATATAAGTGTGGTTATTGAAAATAACTATTCATTTATACGGAGGGTTGGCCGAGTGGTCTAAGGCGGCAGACTTAAGATCTGTTGGACGGTTGTCCGCGCGAGTTCGAACCTCGCATCCTTCAGTAATATTTTTTTAATATACATTTTCTCTGCCATCATGGCTTAAAAAATGCTTAAAAGAAGGGAATTAGGGGGGATGGATGAACTAAGACATAACTTTCTTTTCTTCAATTCGAACTCTGTTGGGAAGAGTTGCTTTAAAAAAGACTCTCTATCCATCTATAAAATTTATTAAAACTTTTGAACTGCACAGAATGATTGGCTCACTTAGAAACAAATTTGAGCATTTCAAAGT…
24	721	0	0	0	60	NC_001133	26264	26398	NC_001134	347518	349584	|gene gene= FLO9 |CDS[fcd=1638](-,24001,27969) gene= FLO9 note= Flo9p;	|gene |tRNA note= GO_component: cytosol [goid 0005829] [evidence NAS] |gene |CDS[fcd=-674](+,347877,349382) note= Ybr056wp;	CGGTGACGGTGGTCATTTCAGTGGATGTAGAGGTAAAAGTGTCGTTCCATGGCTGAGTTGTAGTCATGGCAGTAGTGGCTGTTGTTGGTGTTCTGATGACAATGATGGTCTCATCAGTTGGCAAACCATTGGTA	CGGAGGAGCTACTAAAGAAAGAGTGCTGCAATTAATACAATTAATATAAGTGTGGTTATTGAAAATAACTATTCATTTATACGGAGGGTTGGCCGAGTGGTCTAAGGCGGCAGACTTAAGATCTGTTGGACGGTTGTCCGCGCGAGTTCGAACCTCGCATCCTTCAGTAATATTTTTTTAATATACATTTTCTCTGCCATCATGGCTTAAAAAATGCTTAAAAGAAGGGAATTAGGGGGGATGGATGAACTAAGACATAACTTTCTTTTCTTCAATTCGAACTCTGTTGGGAAGAGTTGCTTTAAAAAAGACTCTCTATCCATCTATAAAATTTATTAAAACTTTTGAACTGCACAGAATGATTGGCTCACTTAGAAACAAATTTGAGCATTTCAAAGT…
25	721	0	0	0	57	NC_001133	26399	26533	NC_001134	347518	349584	|gene gene= FLO9 |CDS[fcd=1503](-,24001,27969) gene= FLO9 note= Flo9p;	|gene |tRNA note= GO_component: cytosol [goid 0005829] [evidence NAS] |gene |CDS[fcd=-674](+,347877,349382) note= Ybr056wp;	CGGTGACGGTGGTGATTTCAGTGGATGTAGAGGTAAAAGTGTCGTTCCATGGCTGAGTTGTAGTCATGGCAGTAGTGGCTGTTGTTGGTGTTCTGATGACAATGATGGTCTCATCAGTTGGCAAACCATTGGTA	CGGAGGAGCTACTAAAGAAAGAGTGCTGCAATTAATACAATTAATATAAGTGTGGTTATTGAAAATAACTATTCATTTATACGGAGGGTTGGCCGAGTGGTCTAAGGCGGCAGACTTAAGATCTGTTGGACGGTTGTCCGCGCGAGTTCGAACCTCGCATCCTTCAGTAATATTTTTTTAATATACATTTTCTCTGCCATCATGGCTTAAAAAATGCTTAAAAGAAGGGAATTAGGGGGGATGGATGAACTAAGACATAACTTTCTTTTCTTCAATTCGAACTCTGTTGGGAAGAGTTGCTTTAAAAAAGACTCTCTATCCATCTATAAAATTTATTAAAACTTTTGAACTGCACAGAATGATTGGCTCACTTAGAAACAAATTTGAGCATTTCAAAGT…
26	721	0	0	0	80	NC_001133	26534	26668	NC_001134	347518	349584	|gene gene= FLO9 |CDS[fcd=1368](-,24001,27969) gene= FLO9 note= Flo9p;	|gene |tRNA note= GO_component: cytosol [goid 0005829] [evidence NAS] |gene |CDS[fcd=-674](+,347877,349382) note= Ybr056wp;	CGGTGACTGTGGTCAATTCGGTAGAAGTAGAGGTAAAAGTGTCGTTCCATGGCTGAGTTGTAGTCATGGCAGTAGTGGCTGTTGTTGGTGTTCTGATGACAATGATGGTCTCATCAGTTGGCAAACCATTGGTA	CGGAGGAGCTACTAAAGAAAGAGTGCTGCAATTAATACAATTAATATAAGTGTGGTTATTGAAAATAACTATTCATTTATACGGAGGGTTGGCCGAGTGGTCTAAGGCGGCAGACTTAAGATCTGTTGGACGGTTGTCCGCGCGAGTTCGAACCTCGCATCCTTCAGTAATATTTTTTTAATATACATTTTCTCTGCCATCATGGCTTAAAAAATGCTTAAAAGAAGGGAATTAGGGGGGATGGATGAACTAAGACATAACTTTCTTTTCTTCAATTCGAACTCTGTTGGGAAGAGTTGCTTTAAAAAAGACTCTCTATCCATCTATAAAATTTATTAAAACTTTTGAACTGCACAGAATGATTGGCTCACTTAGAAACAAATTTGAGCATTTCAAAGT…
27	721	0	0	0	201	NC_001133	26669	26803	NC_001134	347518	349584	|gene gene= FLO9 |CDS[fcd=1233](-,24001,27969) gene= FLO9 note= Flo9p;	|gene |tRNA note= GO_component: cytosol [goid 0005829] [evidence NAS] |gene |CDS[fcd=-674](+,347877,349382) note= Ybr056wp;	CGGTGACTGTGGTCAATTCGGTAGAAGTAGAGGTAAAAGTGTCGTTCCATGGCTGAGTTGTAGTCATGGCAGTAGTGGCTGTTGTTGGTGTTCTGATGACAATGATGGTCTCATCAGTTGGCAAACCATTGGTA	CGGAGGAGCTACTAAAGAAAGAGTGCTGCAATTAATACAATTAATATAAGTGTGGTTATTGAAAATAACTATTCATTTATACGGAGGGTTGGCCGAGTGGTCTAAGGCGGCAGACTTAAGATCTGTTGGACGGTTGTCCGCGCGAGTTCGAACCTCGCATCCTTCAGTAATATTTTTTTAATATACATTTTCTCTGCCATCATGGCTTAAAAAATGCTTAAAAGAAGGGAATTAGGGGGGATGGATGAACTAAGACATAACTTTCTTTTCTTCAATTCGAACTCTGTTGGGAAGAGTTGCTTTAAAAAAGACTCTCTATCCATCTATAAAATTTATTAAAACTTTTGAACTGCACAGAATGATTGGCTCACTTAGAAACAAATTTGAGCATTTCAAAGT…
28	721	0	0	0	5	NC_001133	26804	27073	NC_001134	347518	349584	|gene gene= FLO9 |CDS[fcd=1031](-,24001,27969) gene= FLO9 note= Flo9p;	|gene |tRNA note= GO_component: cytosol [goid 0005829] [evidence NAS] |gene |CDS[fcd=-674](+,347877,349382) note= Ybr056wp;	CGGTGACTGTGGTCAATTCGGTAGAAGTAGAGGTAAAAGTGCTGTTCCATGGCTCAGTTGTAGTTATGGCAGTAGTGGCTGTTGTTGGTGTTCTGATTACAATGATGGTTTCGTCAGTTCGTACACCATTGGTGCCAGTGACTGTGGTCAATTCGGTAGAAGTAGAGGTAAAAGTGCTGTTCCATGGCTCAGTTGTAGTTATGATGGTGCTAGCAGTTGTTGGAGTTCTGATGACAATGACGGTTTCGTCAGTTGGAACGCCGTTGGTA	CGGAGGAGCTACTAAAGAAAGAGTGCTGCAATTAATACAATTAATATAAGTGTGGTTATTGAAAATAACTATTCATTTATACGGAGGGTTGGCCGAGTGGTCTAAGGCGGCAGACTTAAGATCTGTTGGACGGTTGTCCGCGCGAGTTCGAACCTCGCATCCTTCAGTAATATTTTTTTAATATACATTTTCTCTGCCATCATGGCTTAAAAAATGCTTAAAAGAAGGGAATTAGGGGGGATGGATGAACTAAGACATAACTTTCTTTTCTTCAATTCGAACTCTGTTGGGAAGAGTTGCTTTAAAAAAGACTCTCTATCCATCTATAAAATTTATTAAAACTTTTGAACTGCACAGAATGATTGGCTCACTTAGAAACAAATTTGAGCATTTCAAAGT…
35	721	1	1	0	0	NC_001133	31685	32137	NC_001134	347518	349584	|gene gene= GDH3 note= synonym: FUN51 |CDS[fcd=-343](+,31568,32941) gene= GDH3 note= Gdh3p;	|gene |tRNA note= GO_component: cytosol [goid 0005829] [evidence NAS] |gene |CDS[fcd=-674](+,347877,349382) note= Ybr056wp;	CGGAGAGGATCATTCAATTCAGGGTCACGTGGGAAAATGATAATGGCGAGCAAGAAGTGGCTCAAGGATACAGGGTGCAGTTCAATTCAGCCAAGGGCCCTTACAAGGGTGGCCTACGCTTCCACCCATCAGTGAACCTGTCTATCCTAAAATTTTTGGGTTTTGAACAGATCTTCAAGAATGCGCTCACTGGGCTAGATATGGGCGGTGGTAAGGGTGGCCTGTGTGTGGACTTGAAAGGCAAGTCTGACAACGAGATCAGAAGGATTTGTTATGCGTTCATGAGAGAACTGAGCAGGCATATTGGTAAGGACACAGACGTGCCCGCAGGAGATATTGGTGTCGGTGGCCGTGAAATTGGCTACCTATTCGGCGCTTACAGATCATACAAGAACTCCT…	CGGAGGAGCTACTAAAGAAAGAGTGCTGCAATTAATACAATTAATATAAGTGTGGTTATTGAAAATAACTATTCATTTATACGGAGGGTTGGCCGAGTGGTCTAAGGCGGCAGACTTAAGATCTGTTGGACGGTTGTCCGCGCGAGTTCGAACCTCGCATCCTTCAGTAATATTTTTTTAATATACATTTTCTCTGCCATCATGGCTTAAAAAATGCTTAAAAGAAGGGAATTAGGGGGGATGGATGAACTAAGACATAACTTTCTTTTCTTCAATTCGAACTCTGTTGGGAAGAGTTGCTTTAAAAAAGACTCTCTATCCATCTATAAAATTTATTAAAACTTTTGAACTGCACAGAATGATTGGCTCACTTAGAAACAAATTTGAGCATTTCAAAGT…
55	721	1	1	0	0	NC_001133	41087	43002	NC_001134	347518	349584	|gene gene= GPB2 note= synonym: KRH1 |CDS(+,39260,41902) gene= GPB2 note= Gpb2p; |rep_origin note= ARS105 |gene gene= PEX22 note= synonym: YAF5 |CDS(+,42178,42720) gene= PEX22 note= Pex22p; |gene gene= ACS1 note= synonym: FUN44 |CDS(-,42882,45023) gene= ACS1 note= Acs1p;	|gene |tRNA note= GO_component: cytosol [goid 0005829] [evidence NAS] |gene |CDS[fcd=-674](+,347877,349382) note= Ybr056wp;	CGGTTTTCCCCATGATGGTTCATGGCACGCATCAAGATCTTTTCAATAGTGGCTCTGCGGCACAAGAATCGCCCAAAGCTGGTGCCTCGGCCAGCAGCGCAAGTGCTGCGAGCTTTGATCCCGATATGGACGATAATTTGGAAAATTATATAATCAATCCAGGGAGAAAATCGTCATCTATTCCAATGACTGCGATAGGGAGACAGAGATTAATTTTAAGCCAAGAGAAGCCAGTAGGTAAAACTGTTGTATTGCATGGTGGGTCTAACGGTCTCAACGTTCTTGATGATATGTGGTTGATGGACTTAGAGTGTGAGACATGGACTCCAATAGAGACATTTGCAAAGGCAGATTCGAGCGAAGACGGTGATGAAAAATTGGATAGTGTGAACGTAGGTC…	CGGAGGAGCTACTAAAGAAAGAGTGCTGCAATTAATACAATTAATATAAGTGTGGTTATTGAAAATAACTATTCATTTATACGGAGGGTTGGCCGAGTGGTCTAAGGCGGCAGACTTAAGATCTGTTGGACGGTTGTCCGCGCGAGTTCGAACCTCGCATCCTTCAGTAATATTTTTTTAATATACATTTTCTCTGCCATCATGGCTTAAAAAATGCTTAAAAGAAGGGAATTAGGGGGGATGGATGAACTAAGACATAACTTTCTTTTCTTCAATTCGAACTCTGTTGGGAAGAGTTGCTTTAAAAAAGACTCTCTATCCATCTATAAAATTTATTAAAACTTTTGAACTGCACAGAATGATTGGCTCACTTAGAAACAAATTTGAGCATTTCAAAGT…
75	721	0	0	153	153	NC_001133	57456	57688	NC_001134	347518	349584	|gene |CDS[fcd=-53](+,57519,57851) note= Yal044w-ap;	|gene |tRNA note= GO_component: cytosol [goid 0005829] [evidence NAS] |gene |CDS[fcd=-674](+,347877,349382) note= Ybr056wp;	CGGAATGACGAATCAAAAAGAGAATAGCATCGTTAGCAGCAAACGAAAGTGGAAAGAGAATAATGTTCAAGAGAGCAATGAGCACAGATGGTCCCGTGGCACGTACCATCCTGAAGAGACTGGAATGCGGCTTTCCAGATTACAAGAACTTTGCGTTTGGCCTCTACAACGATTCTCACAAGCATAAGGGCCATGCTGGTGTACAGGGAAATGTCTCTGCTGAGACACATTT	CGGAGGAGCTACTAAAGAAAGAGTGCTGCAATTAATACAATTAATATAAGTGTGGTTATTGAAAATAACTATTCATTTATACGGAGGGTTGGCCGAGTGGTCTAAGGCGGCAGACTTAAGATCTGTTGGACGGTTGTCCGCGCGAGTTCGAACCTCGCATCCTTCAGTAATATTTTTTTAATATACATTTTCTCTGCCATCATGGCTTAAAAAATGCTTAAAAGAAGGGAATTAGGGGGGATGGATGAACTAAGACATAACTTTCTTTTCTTCAATTCGAACTCTGTTGGGAAGAGTTGCTTTAAAAAAGACTCTCTATCCATCTATAAAATTTATTAAAACTTTTGAACTGCACAGAATGATTGGCTCACTTAGAAACAAATTTGAGCATTTCAAAGT…
165	721	1	1	0	0	NC_001133	124697	127118	NC_001134	347518	349584	|gene gene= TPD3 note= synonym: FUN32 |CDS(+,124880,126787) gene= TPD3 note= Tpd3p; |gene gene= NTG1 note= synonyms: SCR1, FUN33 |CDS(-,126904,128103) gene= NTG1 note= Ntg1p;	|gene |tRNA note= GO_component: cytosol [goid 0005829] [evidence NAS] |gene |CDS[fcd=-674](+,347877,349382) note= Ybr056wp;	CGGAATGCCCTTTTTGCAGGGAAAGCGAAAAAGGTGAAAGAGTTAACAGGAGAAAGTGTTAGGGAACTAAGTTACGAAGGAAGGCAGATAGCAACAATACTAACGTGGAACTTATTTCGACGACTATAACAACTGGTATCTGATTATCGAAGAATAATTGAGTGGTCAGAAAGGAGCGAAATATGTCTGGAGCAAGATCAACAACGGCAGGTGCCGTGCCCTCGGCAGCAACAACATCAACAACATCAACAACGTCAAACTCTAAGGACTCAGACTCTAACGAGTCATTATATCCCTTGGCTCTGCTTATGGATGAGTTAAAACATGATGATATTGCTAATAGGGTAGAAGCCATGAAAAAACTAGATACCATCGCGTTGGCACTCGGTCCCGAAAGAA…	CGGAGGAGCTACTAAAGAAAGAGTGCTGCAATTAATACAATTAATATAAGTGTGGTTATTGAAAATAACTATTCATTTATACGGAGGGTTGGCCGAGTGGTCTAAGGCGGCAGACTTAAGATCTGTTGGACGGTTGTCCGCGCGAGTTCGAACCTCGCATCCTTCAGTAATATTTTTTTAATATACATTTTCTCTGCCATCATGGCTTAAAAAATGCTTAAAAGAAGGGAATTAGGGGGGATGGATGAACTAAGACATAACTTTCTTTTCTTCAATTCGAACTCTGTTGGGAAGAGTTGCTTTAAAAAAGACTCTCTATCCATCTATAAAATTTATTAAAACTTTTGAACTGCACAGAATGATTGGCTCACTTAGAAACAAATTTGAGCATTTCAAAGT…
248	721	0	0	0	3	NC_001133	204286	204555	NC_001134	347518	349584	|gene gene= FLO1 note= synonyms: FLO4, FLO2 |CDS[fcd=-1026](+,203394,208007) gene= FLO1 note= Flo1p;	|gene |tRNA note= GO_component: cytosol [goid 0005829] [evidence NAS] |gene |CDS[fcd=-674](+,347877,349382) note= Ybr056wp;	CGGTACCAACGGCGTTCCAACTGACGAAACCGTCATTGTCATCAGAACTCCAACAACTGCTAGCACCATCATAACTACAACTGAGCCATGGAACAGCACTTTTACCTCTACTTCTACCGAATTGACCACAGTCACTGGCACCAATGGTGTACGAACTGACGAAACCATCATTGTAATCAGAACACCAACAACAGCCACTACTGCCATAACTACAACTGAGCCATGGAACAGCACTTTTACCTCTACTTCTACCGAATTGACCACAGTCA	CGGAGGAGCTACTAAAGAAAGAGTGCTGCAATTAATACAATTAATATAAGTGTGGTTATTGAAAATAACTATTCATTTATACGGAGGGTTGGCCGAGTGGTCTAAGGCGGCAGACTTAAGATCTGTTGGACGGTTGTCCGCGCGAGTTCGAACCTCGCATCCTTCAGTAATATTTTTTTAATATACATTTTCTCTGCCATCATGGCTTAAAAAATGCTTAAAAGAAGGGAATTAGGGGGGATGGATGAACTAAGACATAACTTTCTTTTCTTCAATTCGAACTCTGTTGGGAAGAGTTGCTTTAAAAAAGACTCTCTATCCATCTATAAAATTTATTAAAACTTTTGAACTGCACAGAATGATTGGCTCACTTAGAAACAAATTTGAGCATTTCAAAGT…
249	721	0	0	0	119	NC_001133	204556	204690	NC_001134	347518	349584	|gene gene= FLO1 note= synonyms: FLO4, FLO2 |CDS[fcd=-1229](+,203394,208007) gene= FLO1 note= Flo1p;	|gene |tRNA note= GO_component: cytosol [goid 0005829] [evidence NAS] |gene |CDS[fcd=-674](+,347877,349382) note= Ybr056wp;	CGGTACCAATGGTTTGCCAACTGATGAGACCATCATTGTCATCAGAACACCAACAACAGCCACTACTGCCATGACTACAACTCAGCCATGGAACGACACTTTTACCTCTACTTCTACCGAATTGACCACAGTCA	CGGAGGAGCTACTAAAGAAAGAGTGCTGCAATTAATACAATTAATATAAGTGTGGTTATTGAAAATAACTATTCATTTATACGGAGGGTTGGCCGAGTGGTCTAAGGCGGCAGACTTAAGATCTGTTGGACGGTTGTCCGCGCGAGTTCGAACCTCGCATCCTTCAGTAATATTTTTTTAATATACATTTTCTCTGCCATCATGGCTTAAAAAATGCTTAAAAGAAGGGAATTAGGGGGGATGGATGAACTAAGACATAACTTTCTTTTCTTCAATTCGAACTCTGTTGGGAAGAGTTGCTTTAAAAAAGACTCTCTATCCATCTATAAAATTTATTAAAACTTTTGAACTGCACAGAATGATTGGCTCACTTAGAAACAAATTTGAGCATTTCAAAGT…
250	721	0	0	0	112	NC_001133	204691	204825	NC_001134	347518	349584	|gene gene= FLO1 note= synonyms: FLO4, FLO2 |CDS[fcd=-1364](+,203394,208007) gene= FLO1 note= Flo1p;	|gene |tRNA note= GO_component: cytosol [goid 0005829] [evidence NAS] |gene |CDS[fcd=-674](+,347877,349382) note= Ybr056wp;	CGGTACCAATGGTTTGCCAACTGATGAGACCATCATTGTCATCAGAACACCAACAACAGCCACTACTGCCATGACTACAACTCAGCCATGGAACGACACTTTTACCTCTACTTCTACCGAATTGACCACAGTCA	CGGAGGAGCTACTAAAGAAAGAGTGCTGCAATTAATACAATTAATATAAGTGTGGTTATTGAAAATAACTATTCATTTATACGGAGGGTTGGCCGAGTGGTCTAAGGCGGCAGACTTAAGATCTGTTGGACGGTTGTCCGCGCGAGTTCGAACCTCGCATCCTTCAGTAATATTTTTTTAATATACATTTTCTCTGCCATCATGGCTTAAAAAATGCTTAAAAGAAGGGAATTAGGGGGGATGGATGAACTAAGACATAACTTTCTTTTCTTCAATTCGAACTCTGTTGGGAAGAGTTGCTTTAAAAAAGACTCTCTATCCATCTATAAAATTTATTAAAACTTTTGAACTGCACAGAATGATTGGCTCACTTAGAAACAAATTTGAGCATTTCAAAGT…
251	721	0	0	0	203	NC_001133	204826	204960	NC_001134	347518	349584	|gene gene= FLO1 note= synonyms: FLO4, FLO2 |CDS[fcd=-1499](+,203394,208007) gene= FLO1 note= Flo1p;	|gene |tRNA note= GO_component: cytosol [goid 0005829] [evidence NAS] |gene |CDS[fcd=-674](+,347877,349382) note= Ybr056wp;	CGGTACCAATGGTTTGCCAACTGATGAGACCATCATTGTCATCAGAACACCAACAACAGCCACTACTGCCATGACTACAACTCAGCCATGGAACGACACTTTTACCTCTACATCCACTGAAATCACCACCGTCA	CGGAGGAGCTACTAAAGAAAGAGTGCTGCAATTAATACAATTAATATAAGTGTGGTTATTGAAAATAACTATTCATTTATACGGAGGGTTGGCCGAGTGGTCTAAGGCGGCAGACTTAAGATCTGTTGGACGGTTGTCCGCGCGAGTTCGAACCTCGCATCCTTCAGTAATATTTTTTTAATATACATTTTCTCTGCCATCATGGCTTAAAAAATGCTTAAAAGAAGGGAATTAGGGGGGATGGATGAACTAAGACATAACTTTCTTTTCTTCAATTCGAACTCTGTTGGGAAGAGTTGCTTTAAAAAAGACTCTCTATCCATCTATAAAATTTATTAAAACTTTTGAACTGCACAGAATGATTGGCTCACTTAGAAACAAATTTGAGCATTTCAAAGT…
252	721	0	0	0	111	NC_001133	204961	205095	NC_001134	347518	349584	|gene gene= FLO1 note= synonyms: FLO4, FLO2 |CDS[fcd=-1634](+,203394,208007) gene= FLO1 note= Flo1p;	|gene |tRNA note= GO_component: cytosol [goid 0005829] [evidence NAS] |gene |CDS[fcd=-674](+,347877,349382) note= Ybr056wp;	CGGTACCAATGGTTTGCCAACTGATGAGACCATCATTGTCATCAGAACACCAACAACAGCCACTACTGCCATGACTACACCTCAGCCATGGAACGACACTTTTACCTCTACATCCACTGAAATGACCACCGTCA	CGGAGGAGCTACTAAAGAAAGAGTGCTGCAATTAATACAATTAATATAAGTGTGGTTATTGAAAATAACTATTCATTTATACGGAGGGTTGGCCGAGTGGTCTAAGGCGGCAGACTTAAGATCTGTTGGACGGTTGTCCGCGCGAGTTCGAACCTCGCATCCTTCAGTAATATTTTTTTAATATACATTTTCTCTGCCATCATGGCTTAAAAAATGCTTAAAAGAAGGGAATTAGGGGGGATGGATGAACTAAGACATAACTTTCTTTTCTTCAATTCGAACTCTGTTGGGAAGAGTTGCTTTAAAAAAGACTCTCTATCCATCTATAAAATTTATTAAAACTTTTGAACTGCACAGAATGATTGGCTCACTTAGAAACAAATTTGAGCATTTCAAAGT…
253	721	0	0	0	1	NC_001133	205096	205230	NC_001134	347518	349584	|gene gene= FLO1 note= synonyms: FLO4, FLO2 |CDS[fcd=-1769](+,203394,208007) gene= FLO1 note= Flo1p;	|gene |tRNA note= GO_component: cytosol [goid 0005829] [evidence NAS] |gene |CDS[fcd=-674](+,347877,349382) note= Ybr056wp;	CGGTACCAACGGTTTGCCAACTGATGAAACCATCATTGTCATCAGAACACCAACAACAGCCACTACTGCCATAACTACAACTGAGCCATGGAACAGCACTTTTACCTCTACATCCACTGAAATGACCACCGTCA	CGGAGGAGCTACTAAAGAAAGAGTGCTGCAATTAATACAATTAATATAAGTGTGGTTATTGAAAATAACTATTCATTTATACGGAGGGTTGGCCGAGTGGTCTAAGGCGGCAGACTTAAGATCTGTTGGACGGTTGTCCGCGCGAGTTCGAACCTCGCATCCTTCAGTAATATTTTTTTAATATACATTTTCTCTGCCATCATGGCTTAAAAAATGCTTAAAAGAAGGGAATTAGGGGGGATGGATGAACTAAGACATAACTTTCTTTTCTTCAATTCGAACTCTGTTGGGAAGAGTTGCTTTAAAAAAGACTCTCTATCCATCTATAAAATTTATTAAAACTTTTGAACTGCACAGAATGATTGGCTCACTTAGAAACAAATTTGAGCATTTCAAAGT…
296	721	0	0	0	6	NC_001134	0	45	NC_001134	347518	349584	|repeat_region gene= TEL02L note= Telomeric region on the left arm of Chromosome II; |repeat_region gene= TEL02L-YP note= Telomeric short Y' element on the left arm of |neigh_up NC_001134-start |neigh_down CDS[fcd=2636](-,280,2658) note= Ybl113cp;	|gene |tRNA note= GO_component: cytosol [goid 0005829] [evidence NAS] |gene |CDS[fcd=-674](+,347877,349382) note= Ybr056wp;	AAATAGCCCTCATGTACGTCTCCTCCAAGCCCTGTTGTCTCTTAC	CGGAGGAGCTACTAAAGAAAGAGTGCTGCAATTAATACAATTAATATAAGTGTGGTTATTGAAAATAACTATTCATTTATACGGAGGGTTGGCCGAGTGGTCTAAGGCGGCAGACTTAAGATCTGTTGGACGGTTGTCCGCGCGAGTTCGAACCTCGCATCCTTCAGTAATATTTTTTTAATATACATTTTCTCTGCCATCATGGCTTAAAAAATGCTTAAAAGAAGGGAATTAGGGGGGATGGATGAACTAAGACATAACTTTCTTTTCTTCAATTCGAACTCTGTTGGGAAGAGTTGCTTTAAAAAAGACTCTCTATCCATCTATAAAATTTATTAAAACTTTTGAACTGCACAGAATGATTGGCTCACTTAGAAACAAATTTGAGCATTTCAAAGT…
300	721	0	0	0	34	NC_001134	3740	3845	NC_001134	347518	349584	|repeat_region gene= TEL02L note= Telomeric region on the left arm of Chromosome II; |repeat_region gene= TEL02L-YP note= Telomeric short Y' element on the left arm of |gene note= Ybl111cp; |neigh_up CDS[fcd=-893](-,2582,2899) note= Ybl112cp; |neigh_down CDS[fcd=3941](-,7605,7733) gene= PAU9 note= Pau9p;	|gene |tRNA note= GO_component: cytosol [goid 0005829] [evidence NAS] |gene |CDS[fcd=-674](+,347877,349382) note= Ybr056wp;	CGGTGGGGCCTGTACTGCCACAGAGGGTGTGTCTGCCATGTATATTTCATGACATAAGCGCAACTGATGCAAGTCCCTGAATTCAAAGGAGCTGCCAAAGAGTTT	CGGAGGAGCTACTAAAGAAAGAGTGCTGCAATTAATACAATTAATATAAGTGTGGTTATTGAAAATAACTATTCATTTATACGGAGGGTTGGCCGAGTGGTCTAAGGCGGCAGACTTAAGATCTGTTGGACGGTTGTCCGCGCGAGTTCGAACCTCGCATCCTTCAGTAATATTTTTTTAATATACATTTTCTCTGCCATCATGGCTTAAAAAATGCTTAAAAGAAGGGAATTAGGGGGGATGGATGAACTAAGACATAACTTTCTTTTCTTCAATTCGAACTCTGTTGGGAAGAGTTGCTTTAAAAAAGACTCTCTATCCATCTATAAAATTTATTAAAACTTTTGAACTGCACAGAATGATTGGCTCACTTAGAAACAAATTTGAGCATTTCAAAGT…
326	721	80	80	0	0	NC_001134	25403	25954	NC_001134	347518	349584	|gene gene= ECM21 |CDS[fcd=2621](-,24946,28299) gene= ECM21 note= Ecm21p;	|gene |tRNA note= GO_component: cytosol [goid 0005829] [evidence NAS] |gene |CDS[fcd=-674](+,347877,349382) note= Ybr056wp;	CGGATGGCCCACTAACTGACGTAGTTCTTGATAAGTTCAATTGTTGAATAGATAGTAAATCAGGGTCATACGAGGCCATGATATTAGGTGATCCCATCGGTGAGACAATGGGAGAAGCTGGAACGGATATGGCTTCTTCAAAAGTTGGCGGAGGTGGACATGTGTTACCAAAAAAGTCGCTGTTCATACTTAGAGGAACCTGGTTGCCTTTGCCTTCCATTGTGGCCATATCATAAGTGGGTAACTCCATATTACCACTGTTGCACTGTTCAGACACCAGGAATATGGGCGTATCGATTAGAACCTCATAATGTCTTAATTTGGACGGACACTCAGGATCAGGTTTACTGATTCGTAGCATAATTTCCAGCTTATGTCTACAGTAAACATTACTGAAGT…	CGGAGGAGCTACTAAAGAAAGAGTGCTGCAATTAATACAATTAATATAAGTGTGGTTATTGAAAATAACTATTCATTTATACGGAGGGTTGGCCGAGTGGTCTAAGGCGGCAGACTTAAGATCTGTTGGACGGTTGTCCGCGCGAGTTCGAACCTCGCATCCTTCAGTAATATTTTTTTAATATACATTTTCTCTGCCATCATGGCTTAAAAAATGCTTAAAAGAAGGGAATTAGGGGGGATGGATGAACTAAGACATAACTTTCTTTTCTTCAATTCGAACTCTGTTGGGAAGAGTTGCTTTAAAAAAGACTCTCTATCCATCTATAAAATTTATTAAAACTTTTGAACTGCACAGAATGATTGGCTCACTTAGAAACAAATTTGAGCATTTCAAAGT…
361	721	4	4	0	0	NC_001134	61806	62809	NC_001134	347518	349584	|gene |CDS[fcd=292](-,61199,62599) note= Ybl086cp;	|gene |tRNA note= GO_component: cytosol [goid 0005829] [evidence NAS] |gene |CDS[fcd=-674](+,347877,349382) note= Ybr056wp;	CGGGTTTCGCTACAGTTGTTCCAATACCGTTAAAATTGGAGAATGTATTCTTGGGTGACATCTGGTTTGTTGTTGATGTGGGGCTAGATAGTTCAGACGTGTTATCCAGTATAGTATTTATTCCTGGCCTGTAATTAGCGAGCTGGCCATTAGTAAACGATTTGGAAATGTTGAAATCTTCGTAAGAGCCTCTAACTAGCTTCAACTGCAATGAGACGTTGATTATAGAATTGACCTTTGAGTGCTTTAGGAGAAATCTGTTTGTTGTGGGAGTTTCGTCTTCTTTGACGTATTCTGTTATATCTATGTCTACTGTTCCCAATAGAAGTTTACCCGTTATCTTTTGAGAATATGAATTGTTTCCTGTGGCCGTTAGTGCAGTGGCGTTAGCATAGGTCG…	CGGAGGAGCTACTAAAGAAAGAGTGCTGCAATTAATACAATTAATATAAGTGTGGTTATTGAAAATAACTATTCATTTATACGGAGGGTTGGCCGAGTGGTCTAAGGCGGCAGACTTAAGATCTGTTGGACGGTTGTCCGCGCGAGTTCGAACCTCGCATCCTTCAGTAATATTTTTTTAATATACATTTTCTCTGCCATCATGGCTTAAAAAATGCTTAAAAGAAGGGAATTAGGGGGGATGGATGAACTAAGACATAACTTTCTTTTCTTCAATTCGAACTCTGTTGGGAAGAGTTGCTTTAAAAAAGACTCTCTATCCATCTATAAAATTTATTAAAACTTTTGAACTGCACAGAATGATTGGCTCACTTAGAAACAAATTTGAGCATTTCAAAGT…
396	721	0	15	0	0	NC_001134	88636	88935	NC_001134	347518	349584	|gene gene= RPS8A |CDS[fcd=338](-,88521,89123) gene= RPS8A note= Rps8ap;	|gene |tRNA note= GO_component: cytosol [goid 0005829] [evidence NAS] |gene |CDS[fcd=-674](+,347877,349382) note= Ybr056wp;	CGGCGCTGAATTGAGATTCAACGGAAGATTCGATCTTGGCAGAAGCAGCTCTAGCAGCCCACTTTCTTTCAGCGTTCTTGCTCTTGGCAACAGTTTCTTCTTCCTTGACGTTCTTCTTCTTACCCAAGGTTTGACCGTAGTGAGCTTCGAACCATTGTCTGAATGGAGTAGCATCAATTTGGACAATGGCAGCCTTGGTCAAAGTGTTAGTTCTAACCAATTCATTGTTGGATGGATGGTAAACAACACCAGCAATTCTGGTCTTCTTGGAGATACCTTCAGAAGCCCAAGAAAAGTTA	CGGAGGAGCTACTAAAGAAAGAGTGCTGCAATTAATACAATTAATATAAGTGTGGTTATTGAAAATAACTATTCATTTATACGGAGGGTTGGCCGAGTGGTCTAAGGCGGCAGACTTAAGATCTGTTGGACGGTTGTCCGCGCGAGTTCGAACCTCGCATCCTTCAGTAATATTTTTTTAATATACATTTTCTCTGCCATCATGGCTTAAAAAATGCTTAAAAGAAGGGAATTAGGGGGGATGGATGAACTAAGACATAACTTTCTTTTCTTCAATTCGAACTCTGTTGGGAAGAGTTGCTTTAAAAAAGACTCTCTATCCATCTATAAAATTTATTAAAACTTTTGAACTGCACAGAATGATTGGCTCACTTAGAAACAAATTTGAGCATTTCAAAGT…
459	721	37	37	0	0	NC_001134	135347	135886	NC_001134	347518	349584	|gene gene= COR1 note= synonym: QCR1 |CDS[fcd=-97](-,134146,135519) gene= COR1 note= Cor1p;	|gene |tRNA note= GO_component: cytosol [goid 0005829] [evidence NAS] |gene |CDS[fcd=-674](+,347877,349382) note= Ybr056wp;	CGGAGCCGAAGACAACACCGACAGAGGCTGTGTGAGCGGAAGGATTATGCTCAGTGGCTACAACTATACCGTTAGATAATTGCGTTACTTCGGCCTTGGGGGTTGCTACAGCTGTAGCCAAAGACCTCTTGAACTGGTTAGATACAGTCTTTGAAGTTACTGTTCTTAGCATTTTTTTTGTTTATATATCTTGTGTTTTCTTTCTCAGTGATATGGTGACGATGATGTTCTTCTCGTATTATTACTCCACAATTGTCTTGATCAGCAATGGTAGCAATTTAATATTAGGATTCGTTACCTATACGAACAGGGATGATATAATATTTTTTCTGTGAAAGCTATTGCTTTATTATACGCTGTTTTCCTCGAATAAGACGGGGAAAGAGAGTAGGGGAATAT…	CGGAGGAGCTACTAAAGAAAGAGTGCTGCAATTAATACAATTAATATAAGTGTGGTTATTGAAAATAACTATTCATTTATACGGAGGGTTGGCCGAGTGGTCTAAGGCGGCAGACTTAAGATCTGTTGGACGGTTGTCCGCGCGAGTTCGAACCTCGCATCCTTCAGTAATATTTTTTTAATATACATTTTCTCTGCCATCATGGCTTAAAAAATGCTTAAAAGAAGGGAATTAGGGGGGATGGATGAACTAAGACATAACTTTCTTTTCTTCAATTCGAACTCTGTTGGGAAGAGTTGCTTTAAAAAAGACTCTCTATCCATCTATAAAATTTATTAAAACTTTTGAACTGCACAGAATGATTGGCTCACTTAGAAACAAATTTGAGCATTTCAAAGT…
461	721	488	488	0	0	NC_001134	135930	136238	NC_001134	347518	349584	|gene |CDS[fcd=-83](+,136001,136369) note= Ybl044wp;	|gene |tRNA note= GO_component: cytosol [goid 0005829] [evidence NAS] |gene |CDS[fcd=-674](+,347877,349382) note= Ybr056wp;	CGGGTTATGTAAATCGTGAAAAAGAATATCTGGTTTTAAAATCTCTCTTTTCTTTTTCCCCCTGGTGGGTATGGGTGAAATGCTAGAGAGGCAAAAAAAAAGGTTGCCAAGTAAAGCGAAGTATTTGAAGTATACTGCAAGCATCACCGAAACAGGAAATCACGAAGCTGACTCATCTGTGATTTTCCGTCCCCACCATAGTGATGTAACATGCAGTAACGCACGGCGGGCCGAAAGTCGGACTTTACCCCAGATTTGTAGTTGTATCCTATTGGATCACGGGCGACGGACAAGACCCGAAGTGCGGA	CGGAGGAGCTACTAAAGAAAGAGTGCTGCAATTAATACAATTAATATAAGTGTGGTTATTGAAAATAACTATTCATTTATACGGAGGGTTGGCCGAGTGGTCTAAGGCGGCAGACTTAAGATCTGTTGGACGGTTGTCCGCGCGAGTTCGAACCTCGCATCCTTCAGTAATATTTTTTTAATATACATTTTCTCTGCCATCATGGCTTAAAAAATGCTTAAAAGAAGGGAATTAGGGGGGATGGATGAACTAAGACATAACTTTCTTTTCTTCAATTCGAACTCTGTTGGGAAGAGTTGCTTTAAAAAAGACTCTCTATCCATCTATAAAATTTATTAAAACTTTTGAACTGCACAGAATGATTGGCTCACTTAGAAACAAATTTGAGCATTTCAAAGT…
506	721	0	0	74	74	NC_001134	168544	170155	NC_001134	347518	349584	|gene gene= RPL19B gene= RPL19B note= Rpl19bp; |rep_origin note= ARS207 |neigh_up CDS[fcd=-1508](-,167521,167841) note= Ybl028cp; |neigh_down CDS[fcd=2135](+,171484,171921) gene= RRN10 note= Rrn10p;	|gene |tRNA note= GO_component: cytosol [goid 0005829] [evidence NAS] |gene |CDS[fcd=-674](+,347877,349382) note= Ybr056wp;	CGGTGGTCGCATAGTTGGTAGCAACATCCATAGAAGAACCTCAGATAAATTTCAAGCTTGTACGAATTGCCGCGTTTATTACAAACTATAGAATTATCGCAGCAATGGTACGTGTCTGTTCCTGCAAGCGTTAATTCGATTGATAGATAAAGTAATTCATTAACCTTTGCGAATATGCTCTTTACTGTTAGGTTTCAGGATTTTAAAAATGAAGCAACTTTACTAACATCAATATGCAAATAAATCTGCAAAAACTTTTTTTCACAGGGCTAACTTGCGTACTCAAAAGAGACTTGCCGCTTCTGTTGTCGGTGTTGGTAAGAGAAAGGTTTGGTTAGACCCAAACGAAACTTCTGAAATTGCCCAAGCCAACTCTAGAAATGCCATTAGAAAATTGGT…	CGGAGGAGCTACTAAAGAAAGAGTGCTGCAATTAATACAATTAATATAAGTGTGGTTATTGAAAATAACTATTCATTTATACGGAGGGTTGGCCGAGTGGTCTAAGGCGGCAGACTTAAGATCTGTTGGACGGTTGTCCGCGCGAGTTCGAACCTCGCATCCTTCAGTAATATTTTTTTAATATACATTTTCTCTGCCATCATGGCTTAAAAAATGCTTAAAAGAAGGGAATTAGGGGGGATGGATGAACTAAGACATAACTTTCTTTTCTTCAATTCGAACTCTGTTGGGAAGAGTTGCTTTAAAAAAGACTCTCTATCCATCTATAAAATTTATTAAAACTTTTGAACTGCACAGAATGATTGGCTCACTTAGAAACAAATTTGAGCATTTCAAAGT…
537	721	92	92	0	0	NC_001134	194779	195192	NC_001134	347518	349584	|gene gene= ACH1 |CDS[fcd=-860](+,194125,195705) gene= ACH1 note= Ach1p;	|gene |tRNA note= GO_component: cytosol [goid 0005829] [evidence NAS] |gene |CDS[fcd=-674](+,347877,349382) note= Ybr056wp;	CGGTTGATCCTGAAAAGGTTGTTGCGATTGTGGAGTCCACCATGAGGGACCAGGTCCCACCAAATACGCCCTCTGACGACATGTCCAGGGCTATTGCAGGTCATTTGGTCGAGTTTTTCAGAAACGAGGTAAAACATGGTAGGCTACCTGAAAACCTGCTGCCTTTACAAAGTGGTATAGGTAACATTGCTAACGCTGTCATTGAAGGGCTTGCTGGCGCCCAATTCAAGCACTTGACTGTATGGACGGAAGTGCTGCAGGACTCGTTCTTGGATCTTTTCGAGAACGGATCTTTGGACTACGCCACTGCTACTTCCGTGAGATTGACTGAAAAGGGTTTCGACAGAGCCTTTGCAAACTGGGAAAATTTCAAACACAGATTGTGTTTGAGATCTCAAG…	CGGAGGAGCTACTAAAGAAAGAGTGCTGCAATTAATACAATTAATATAAGTGTGGTTATTGAAAATAACTATTCATTTATACGGAGGGTTGGCCGAGTGGTCTAAGGCGGCAGACTTAAGATCTGTTGGACGGTTGTCCGCGCGAGTTCGAACCTCGCATCCTTCAGTAATATTTTTTTAATATACATTTTCTCTGCCATCATGGCTTAAAAAATGCTTAAAAGAAGGGAATTAGGGGGGATGGATGAACTAAGACATAACTTTCTTTTCTTCAATTCGAACTCTGTTGGGAAGAGTTGCTTTAAAAAAGACTCTCTATCCATCTATAAAATTTATTAAAACTTTTGAACTGCACAGAATGATTGGCTCACTTAGAAACAAATTTGAGCATTTCAAAGT…
538	721	253	253	0	0	NC_001134	195193	195388	NC_001134	347518	349584	|gene gene= ACH1 |CDS[fcd=-1165](+,194125,195705) gene= ACH1 note= Ach1p;	|gene |tRNA note= GO_component: cytosol [goid 0005829] [evidence NAS] |gene |CDS[fcd=-674](+,347877,349382) note= Ybr056wp;	CGGAAATGATCCGTAGATTGGGTGTCATCGCCATGAATACCCCAGTAGAAGTTGACATTTACGCGCACGCCAATTCTACAAATGTGAATGGTTCCCGTATGTTGAACGGGTTGGGTGGATCTGCTGATTTCTTGAGAAATGCAAAGTTGTCCATCATGCATGCCCCCTCTGCAAGACCAACTAAAGTAGACCCTA	CGGAGGAGCTACTAAAGAAAGAGTGCTGCAATTAATACAATTAATATAAGTGTGGTTATTGAAAATAACTATTCATTTATACGGAGGGTTGGCCGAGTGGTCTAAGGCGGCAGACTTAAGATCTGTTGGACGGTTGTCCGCGCGAGTTCGAACCTCGCATCCTTCAGTAATATTTTTTTAATATACATTTTCTCTGCCATCATGGCTTAAAAAATGCTTAAAAGAAGGGAATTAGGGGGGATGGATGAACTAAGACATAACTTTCTTTTCTTCAATTCGAACTCTGTTGGGAAGAGTTGCTTTAAAAAAGACTCTCTATCCATCTATAAAATTTATTAAAACTTTTGAACTGCACAGAATGATTGGCTCACTTAGAAACAAATTTGAGCATTTCAAAGT…
592	721	1	1	1	1	NC_001134	238538	239928	NC_001134	347518	349584	|gene gene= NTH2 |CDS[fcd=2052](-,238943,241285) gene= NTH2 note= Nth2p;	|gene |tRNA note= GO_component: cytosol [goid 0005829] [evidence NAS] |gene |CDS[fcd=-674](+,347877,349382) note= Ybr056wp;	CGGCTTGGTACGAGAATTCTATCACACGGTAATGATAGTGTTCCCGATGTCAAGCAGTCTTATACAGTACTACCCAAGAGCTTAAGAATAAGCAAGAAGATCTGGCAAGCTACAAGGTACTCATAACGATCTTCAAAGCGTAAGTTATGATCTTATGAAAATCAGACTTTTTTGTCTCAACAAACTCCTAGTTTGAAGATGTTACTGAAATGCCCTTCAAACACTTTTACTTGAAAATCATCGATTACTATTCTAACCTTCACAAATGAGCCTTTACACAACTTGATTAATAATAATATTTGACCTTACTCTAAATCGTCTCAAATATTACTGAGGCACAATCTCATGGTTATTGATAGAAAGAAGAATATAACATATATCTTATTTACATATGTTCGT…	CGGAGGAGCTACTAAAGAAAGAGTGCTGCAATTAATACAATTAATATAAGTGTGGTTATTGAAAATAACTATTCATTTATACGGAGGGTTGGCCGAGTGGTCTAAGGCGGCAGACTTAAGATCTGTTGGACGGTTGTCCGCGCGAGTTCGAACCTCGCATCCTTCAGTAATATTTTTTTAATATACATTTTCTCTGCCATCATGGCTTAAAAAATGCTTAAAAGAAGGGAATTAGGGGGGATGGATGAACTAAGACATAACTTTCTTTTCTTCAATTCGAACTCTGTTGGGAAGAGTTGCTTTAAAAAAGACTCTCTATCCATCTATAAAATTTATTAAAACTTTTGAACTGCACAGAATGATTGGCTCACTTAGAAACAAATTTGAGCATTTCAAAGT…
641	721	886	886	0	0	NC_001134	285213	285580	NC_001134	347518	349584	|gene gene= CHS3 note= synonyms: KTI2, DIT101, CSD2, CAL1 |CDS[fcd=2529](-,284428,287925) gene= CHS3 note= Chs3p;	|gene |tRNA note= GO_component: cytosol [goid 0005829] [evidence NAS] |gene |CDS[fcd=-674](+,347877,349382) note= Ybr056wp;	CGGCAAACAAGTTACCGAACCGAAGACAGATTCAAAAGCTTTAGCCTGATGATGCGAAATATAGTACTCAAACACTTGAATTGCAGTTACCCAAGATTGTGCCTTATTAGCGATCTTGGTCTCACCACAAAGACCCATAATCAAAGGATCTTTAACCATTTCAGCGACCATATGAGTTAAAGCATCGGGAAAGACTTTAGTATCAGCATCAACCATAAGTACCGTTTCGTAGAAGTCTGCCATTAGCCCCGTAATCTGCCAAATATTTTTTAAAAGCTGAAATTCCAATTGAGTCATTCTTTCATCAAATGTTATTTTTTCTAAAAAGGACATCAGAATAATTTGAGAATCACGCTTACCTCTGTTA	CGGAGGAGCTACTAAAGAAAGAGTGCTGCAATTAATACAATTAATATAAGTGTGGTTATTGAAAATAACTATTCATTTATACGGAGGGTTGGCCGAGTGGTCTAAGGCGGCAGACTTAAGATCTGTTGGACGGTTGTCCGCGCGAGTTCGAACCTCGCATCCTTCAGTAATATTTTTTTAATATACATTTTCTCTGCCATCATGGCTTAAAAAATGCTTAAAAGAAGGGAATTAGGGGGGATGGATGAACTAAGACATAACTTTCTTTTCTTCAATTCGAACTCTGTTGGGAAGAGTTGCTTTAAAAAAGACTCTCTATCCATCTATAAAATTTATTAAAACTTTTGAACTGCACAGAATGATTGGCTCACTTAGAAACAAATTTGAGCATTTCAAAGT…
658	2193	0	0	0	16	NC_001134	298979	300364	NC_001136	472049	472093	|gene |CDS(+,298292,299950) note= Ybr030wp; |gene gene= RPL4A |CDS(+,300166,301254) gene= RPL4A note= Rpl4ap;	|gene gene= RPL4B |CDS[fcd=-221](+,471850,472938) gene= RPL4B note= Rpl4bp;	CGGATTTAAAGTTTGTATCGCTATATGATGTGTGCGATAAATGTGGTGAACCAGACATGTGTAAACATCTCATAGCAGAGGAATACTTGGAAGCAGAAAATCTAGACAAAAATATGCCCAAAGTCGCAAGTATGGAGACTCGTGTCATCGATGAAGACTTAATCAAAAGTTTAGAAAATGATTTAGAGAAAGAATACTCTAATGTTACGGCAAACATCGAGGATGATGATGGCGGTATTGAAAACCCTGACGAATGTGTCGATTTAGTGTTAAAGAATGACGTCGCACAAGGCCAAGAAATATTTAATTCCTATGGTGAGCTCTCAAACGTCTTTTTGTTGGCCAGATATGGTTTCACCGTACCTGAGAATCAGTATGATATTGTTCATTTAGGACCTG…	CGGTCGTGCCGTCGCTCGTATTCCAAGAGTTGGTGGTGGTGGTA
658	659	0	0	0	9	NC_001134	298979	300364	NC_001134	300365	300409	|gene |CDS(+,298292,299950) note= Ybr030wp; |gene gene= RPL4A |CDS(+,300166,301254) gene= RPL4A note= Rpl4ap;	|gene gene= RPL4A |CDS[fcd=-221](+,300166,301254) gene= RPL4A note= Rpl4ap;	CGGATTTAAAGTTTGTATCGCTATATGATGTGTGCGATAAATGTGGTGAACCAGACATGTGTAAACATCTCATAGCAGAGGAATACTTGGAAGCAGAAAATCTAGACAAAAATATGCCCAAAGTCGCAAGTATGGAGACTCGTGTCATCGATGAAGACTTAATCAAAAGTTTAGAAAATGATTTAGAGAAAGAATACTCTAATGTTACGGCAAACATCGAGGATGATGATGGCGGTATTGAAAACCCTGACGAATGTGTCGATTTAGTGTTAAAGAATGACGTCGCACAAGGCCAAGAAATATTTAATTCCTATGGTGAGCTCTCAAACGTCTTTTTGTTGGCCAGATATGGTTTCACCGTACCTGAGAATCAGTATGATATTGTTCATTTAGGACCTG…	CGGTCGTGCCGTCGCTCGTATTCCAAGAGTTGGTGGTGGTGGTA
659	2192	0	0	0	14	NC_001134	300365	300409	NC_001136	471443	472048	|gene gene= RPL4A |CDS[fcd=-221](+,300166,301254) gene= RPL4A note= Rpl4ap;	|gene gene= RPL4B |CDS[fcd=105](+,471850,472938) gene= RPL4B note= Rpl4bp;	CGGTCGTGCCGTCGCTCGTATTCCAAGAGTTGGTGGTGGTGGTA	CGGACCCTACATGTTCCGTAAGTCCTGCCTTATTTATCGTAACGGTATTCATCTTACAGGAATTTTTGAATATAGATAACGTTAGTTTTGATAGATTGGAACAAATGGGAAAATAACAATTTAGAAGCGCTTTCCTCAGCGTATCTGAATTATAAAACAACTGCGCATATTGCTAAGAACTGCACTGAAGGCATGAATTGTCTATTCCGTTAGAAATATAATTATTTACGAAAGCATCGCGCAGACGCAATTTTTTTAACATTTTTTTTTTTTCAAGTACTCTGGAAAAGTTTTCATGAAGATCATGAATACGTTACACTACTATTATTATTGAAAATAATATTTCTTTCCTATCAGCAATCGCTTACATATTCATAGTCATTTACTAGGGTATATACC…
659	721	0	0	0	233	NC_001134	300365	300409	NC_001134	347518	349584	|gene gene= RPL4A |CDS[fcd=-221](+,300166,301254) gene= RPL4A note= Rpl4ap;	|gene |tRNA note= GO_component: cytosol [goid 0005829] [evidence NAS] |gene |CDS[fcd=-674](+,347877,349382) note= Ybr056wp;	CGGTCGTGCCGTCGCTCGTATTCCAAGAGTTGGTGGTGGTGGTA	CGGAGGAGCTACTAAAGAAAGAGTGCTGCAATTAATACAATTAATATAAGTGTGGTTATTGAAAATAACTATTCATTTATACGGAGGGTTGGCCGAGTGGTCTAAGGCGGCAGACTTAAGATCTGTTGGACGGTTGTCCGCGCGAGTTCGAACCTCGCATCCTTCAGTAATATTTTTTTAATATACATTTTCTCTGCCATCATGGCTTAAAAAATGCTTAAAAGAAGGGAATTAGGGGGGATGGATGAACTAAGACATAACTTTCTTTTCTTCAATTCGAACTCTGTTGGGAAGAGTTGCTTTAAAAAAGACTCTCTATCCATCTATAAAATTTATTAAAACTTTTGAACTGCACAGAATGATTGGCTCACTTAGAAACAAATTTGAGCATTTCAAAGT…
659	658	0	0	0	9	NC_001134	300365	300409	NC_001134	298979	300364	|gene gene= RPL4A |CDS[fcd=-221](+,300166,301254) gene= RPL4A note= Rpl4ap;	|gene |CDS(+,298292,299950) note= Ybr030wp; |gene gene= RPL4A |CDS(+,300166,301254) gene= RPL4A note= Rpl4ap;	CGGTCGTGCCGTCGCTCGTATTCCAAGAGTTGGTGGTGGTGGTA	CGGATTTAAAGTTTGTATCGCTATATGATGTGTGCGATAAATGTGGTGAACCAGACATGTGTAAACATCTCATAGCAGAGGAATACTTGGAAGCAGAAAATCTAGACAAAAATATGCCCAAAGTCGCAAGTATGGAGACTCGTGTCATCGATGAAGACTTAATCAAAAGTTTAGAAAATGATTTAGAGAAAGAATACTCTAATGTTACGGCAAACATCGAGGATGATGATGGCGGTATTGAAAACCCTGACGAATGTGTCGATTTAGTGTTAAAGAATGACGTCGCACAAGGCCAAGAAATATTTAATTCCTATGGTGAGCTCTCAAACGTCTTTTTGTTGGCCAGATATGGTTTCACCGTACCTGAGAATCAGTATGATATTGTTCATTTAGGACCTG…
673	721	304	304	0	0	NC_001134	310475	310757	NC_001134	347518	349584	|gene gene= SCO1 note= synonym: PET161 |CDS[fcd=835](-,310564,311451) gene= SCO1 note= Sco1p;	|gene |tRNA note= GO_component: cytosol [goid 0005829] [evidence NAS] |gene |CDS[fcd=-674](+,347877,349382) note= Ybr056wp;	CGGGTGATAGCCGATATTACAAGAACGGGTTATAGCGTTATAAGTATATATGTATATACAAGGAAGAAAGTAGCATATATTTACAATCTTATTTGAATAAGAAGGAGTACCATGCCTCCTTCTGCTTGGCGCGCTGCTCTGCAGGCACATAACTCTTAACGTGTTCCACGATCTTGTCCACGCCCGTTTTTTCATCATAATTTCTACCCAAAGCATCAACAAACTGTCCTTCAGGGTCCATGAGATAAAAGAAGATGGAATGGTCTACCAAATAATCTTGGC	CGGAGGAGCTACTAAAGAAAGAGTGCTGCAATTAATACAATTAATATAAGTGTGGTTATTGAAAATAACTATTCATTTATACGGAGGGTTGGCCGAGTGGTCTAAGGCGGCAGACTTAAGATCTGTTGGACGGTTGTCCGCGCGAGTTCGAACCTCGCATCCTTCAGTAATATTTTTTTAATATACATTTTCTCTGCCATCATGGCTTAAAAAATGCTTAAAAGAAGGGAATTAGGGGGGATGGATGAACTAAGACATAACTTTCTTTTCTTCAATTCGAACTCTGTTGGGAAGAGTTGCTTTAAAAAAGACTCTCTATCCATCTATAAAATTTATTAAAACTTTTGAACTGCACAGAATGATTGGCTCACTTAGAAACAAATTTGAGCATTTCAAAGT…
679	720	2	2	0	0	NC_001134	315411	315438	NC_001134	346930	347517	|neigh_up CDS[fcd=-3527](+,311897,314788) gene= CHS2 note= Chs2p; |neigh_down CDS[fcd=151](+,315575,316510) gene= ATP3 note= Atp3p;	|gene gene= PRP6 note= synonyms: TSM7269, RNA6 |CDS[fcd=76](-,344600,347299) gene= PRP6 note= Prp6p;	CGGACCGCAATAACGATTAAAGAAGGC	CGGAATATCCATCCACTCACTCTCCGTTACAGCAGCTAATGATTCTTTCAAATCGGCAAATTGCCGTTTCACGTTTGAAGAATCAACTGAATTGTCATCATCCTTTTCATTAGCTCTTTTCTTTTTCTTTTGTGCTAATTTCAATTCAAGCGTTTTGAATACATTTGCAGCTTCATCATCTTCATCATCTTTCGGTTGGCTTTGAAGATGGTTGTTCAAATTTTCACGGTACCTTTTCGGTATTCTTCTTCCTTTGTCATCATTACTAACCACTTGCTTTTCTTTTGTTGAAAATCCAGTGGCTCCACGACCAATACCTGGTACGTAACCTGCAGGTGGTTCTTGATCCAAAAAAGATGGCCTCTCCATAAAATGTGACGTTTTCTTGCTGTTAAACTC…
679	721	7	7	0	0	NC_001134	315411	315438	NC_001134	347518	349584	|neigh_up CDS[fcd=-3527](+,311897,314788) gene= CHS2 note= Chs2p; |neigh_down CDS[fcd=151](+,315575,316510) gene= ATP3 note= Atp3p;	|gene |tRNA note= GO_component: cytosol [goid 0005829] [evidence NAS] |gene |CDS[fcd=-674](+,347877,349382) note= Ybr056wp;	CGGACCGCAATAACGATTAAAGAAGGC	CGGAGGAGCTACTAAAGAAAGAGTGCTGCAATTAATACAATTAATATAAGTGTGGTTATTGAAAATAACTATTCATTTATACGGAGGGTTGGCCGAGTGGTCTAAGGCGGCAGACTTAAGATCTGTTGGACGGTTGTCCGCGCGAGTTCGAACCTCGCATCCTTCAGTAATATTTTTTTAATATACATTTTCTCTGCCATCATGGCTTAAAAAATGCTTAAAAGAAGGGAATTAGGGGGGATGGATGAACTAAGACATAACTTTCTTTTCTTCAATTCGAACTCTGTTGGGAAGAGTTGCTTTAAAAAAGACTCTCTATCCATCTATAAAATTTATTAAAACTTTTGAACTGCACAGAATGATTGGCTCACTTAGAAACAAATTTGAGCATTTCAAAGT…
694	721	4	4	1	1	NC_001134	324425	324485	NC_001134	347518	349584	|gene gene= TCM62 |CDS[fcd=1603](-,324337,326058) gene= TCM62 note= Tcm62p;	|gene |tRNA note= GO_component: cytosol [goid 0005829] [evidence NAS] |gene |CDS[fcd=-674](+,347877,349382) note= Ybr056wp;	CGGCTAAACAAGAATCCATTTTGCTCCATGGCTCCAAGTTTCCATCCTTTACTGTGTTCA	CGGAGGAGCTACTAAAGAAAGAGTGCTGCAATTAATACAATTAATATAAGTGTGGTTATTGAAAATAACTATTCATTTATACGGAGGGTTGGCCGAGTGGTCTAAGGCGGCAGACTTAAGATCTGTTGGACGGTTGTCCGCGCGAGTTCGAACCTCGCATCCTTCAGTAATATTTTTTTAATATACATTTTCTCTGCCATCATGGCTTAAAAAATGCTTAAAAGAAGGGAATTAGGGGGGATGGATGAACTAAGACATAACTTTCTTTTCTTCAATTCGAACTCTGTTGGGAAGAGTTGCTTTAAAAAAGACTCTCTATCCATCTATAAAATTTATTAAAACTTTTGAACTGCACAGAATGATTGGCTCACTTAGAAACAAATTTGAGCATTTCAAAGT…
700	721	0	3	0	0	NC_001134	333452	333553	NC_001134	347518	349584	|gene gene= RPS11B gene= RPS11B note= Rps11bp; |neigh_up CDS[fcd=-1671](+,331831,332358) gene= FMP23 note= Fmp23p; |neigh_down CDS[fcd=3314](-,334384,336816) gene= REB1 note= Reb1p;	|gene |tRNA note= GO_component: cytosol [goid 0005829] [evidence NAS] |gene |CDS[fcd=-674](+,347877,349382) note= Ybr056wp;	CGGTTTGGGATTCAAGACCCCAAAGACCGCTATTGAAGGTTCTTACATTGATAAGAAATGTCCATTCACTGGTTTAGTTTCCATCCGTGGTAAGATCTTGA	CGGAGGAGCTACTAAAGAAAGAGTGCTGCAATTAATACAATTAATATAAGTGTGGTTATTGAAAATAACTATTCATTTATACGGAGGGTTGGCCGAGTGGTCTAAGGCGGCAGACTTAAGATCTGTTGGACGGTTGTCCGCGCGAGTTCGAACCTCGCATCCTTCAGTAATATTTTTTTAATATACATTTTCTCTGCCATCATGGCTTAAAAAATGCTTAAAAGAAGGGAATTAGGGGGGATGGATGAACTAAGACATAACTTTCTTTTCTTCAATTCGAACTCTGTTGGGAAGAGTTGCTTTAAAAAAGACTCTCTATCCATCTATAAAATTTATTAAAACTTTTGAACTGCACAGAATGATTGGCTCACTTAGAAACAAATTTGAGCATTTCAAAGT…
701	721	633	945	0	0	NC_001134	333554	333775	NC_001134	347518	349584	|gene gene= RPS11B gene= RPS11B note= Rps11bp; |neigh_up CDS[fcd=-1833](+,331831,332358) gene= FMP23 note= Fmp23p; |neigh_down CDS[fcd=3152](-,334384,336816) gene= REB1 note= Reb1p;	|gene |tRNA note= GO_component: cytosol [goid 0005829] [evidence NAS] |gene |CDS[fcd=-674](+,347877,349382) note= Ybr056wp;	CGGTACCGTCGTCTCCACCAAGATGCACCGTACCATTGTCATCAGAAGAGCTTACTTGCATTACATTCCAAAGTACAACAGATACGAAAAGAGACACAAGAACGTCCCAGTCCACGTCTCCCCAGCTTTCCGTGTCCAAGTTGGTGACATTGTTACCGTTGGTCAATGTAGACCAATCTCCAAGACTGTTAGATTCAACGTCGTCAAGGTCTCTGCTGCTG	CGGAGGAGCTACTAAAGAAAGAGTGCTGCAATTAATACAATTAATATAAGTGTGGTTATTGAAAATAACTATTCATTTATACGGAGGGTTGGCCGAGTGGTCTAAGGCGGCAGACTTAAGATCTGTTGGACGGTTGTCCGCGCGAGTTCGAACCTCGCATCCTTCAGTAATATTTTTTTAATATACATTTTCTCTGCCATCATGGCTTAAAAAATGCTTAAAAGAAGGGAATTAGGGGGGATGGATGAACTAAGACATAACTTTCTTTTCTTCAATTCGAACTCTGTTGGGAAGAGTTGCTTTAAAAAAGACTCTCTATCCATCTATAAAATTTATTAAAACTTTTGAACTGCACAGAATGATTGGCTCACTTAGAAACAAATTTGAGCATTTCAAAGT…
702	721	119	119	0	0	NC_001134	333776	334256	NC_001134	347518	349584	|gene gene= RPS11B gene= RPS11B note= Rps11bp; |neigh_up CDS[fcd=-2185](+,331831,332358) gene= FMP23 note= Fmp23p; |neigh_down CDS[fcd=2800](-,334384,336816) gene= REB1 note= Reb1p;	|gene |tRNA note= GO_component: cytosol [goid 0005829] [evidence NAS] |gene |CDS[fcd=-674](+,347877,349382) note= Ybr056wp;	CGGTAAGGCCAACAAGCAATTTGCTAAATTTTAAAGAAATAAAATTAACAAGATGATATAATAATAAGTGGAGGATAAAACGTAGGACTTCTGGTGAATTATTTGAACCAAAGTGTCGTATATTAGGCTCTTTTTCTTTTTCTTTTACCAGACTTGGTTTTTTTCTCTCTTTAGTAATTGTTTCTATATATGGCTTATCAATTCTATATATTTTTTAACTTGAATATATGAATGACATCTTTAATAATCACATCTCGGCAAACGACTGATGAGTTCCACCTGCTTATTGTTTATTTCCTTTCGTACACGCCGCGCTTGGCCAGTCCTTCCAAGAATGTAGGCAGAAGAAATCAAACTAACTTGTAAGAGAAAGAATAAAATTCATTATACATATAGGTA…	CGGAGGAGCTACTAAAGAAAGAGTGCTGCAATTAATACAATTAATATAAGTGTGGTTATTGAAAATAACTATTCATTTATACGGAGGGTTGGCCGAGTGGTCTAAGGCGGCAGACTTAAGATCTGTTGGACGGTTGTCCGCGCGAGTTCGAACCTCGCATCCTTCAGTAATATTTTTTTAATATACATTTTCTCTGCCATCATGGCTTAAAAAATGCTTAAAAGAAGGGAATTAGGGGGGATGGATGAACTAAGACATAACTTTCTTTTCTTCAATTCGAACTCTGTTGGGAAGAGTTGCTTTAAAAAAGACTCTCTATCCATCTATAAAATTTATTAAAACTTTTGAACTGCACAGAATGATTGGCTCACTTAGAAACAAATTTGAGCATTTCAAAGT…
703	721	5	5	0	0	NC_001134	334257	334377	NC_001134	347518	349584	|neigh_up CDS[fcd=-2486](+,331831,332358) gene= FMP23 note= Fmp23p; |neigh_down CDS[fcd=2499](-,334384,336816) gene= REB1 note= Reb1p;	|gene |tRNA note= GO_component: cytosol [goid 0005829] [evidence NAS] |gene |CDS[fcd=-674](+,347877,349382) note= Ybr056wp;	CGGCAATAAGTGAAGACAAGATTTGCCAAATTGTTACAGGGCTAAAAAAAAGATAAATGATGAAAAATAACGCGTACTATCAAACATTATTGAGTTTTTCGCTTTCACCAATTATATTTT	CGGAGGAGCTACTAAAGAAAGAGTGCTGCAATTAATACAATTAATATAAGTGTGGTTATTGAAAATAACTATTCATTTATACGGAGGGTTGGCCGAGTGGTCTAAGGCGGCAGACTTAAGATCTGTTGGACGGTTGTCCGCGCGAGTTCGAACCTCGCATCCTTCAGTAATATTTTTTTAATATACATTTTCTCTGCCATCATGGCTTAAAAAATGCTTAAAAGAAGGGAATTAGGGGGGATGGATGAACTAAGACATAACTTTCTTTTCTTCAATTCGAACTCTGTTGGGAAGAGTTGCTTTAAAAAAGACTCTCTATCCATCTATAAAATTTATTAAAACTTTTGAACTGCACAGAATGATTGGCTCACTTAGAAACAAATTTGAGCATTTCAAAGT…
709	721	2	2	0	0	NC_001134	340640	340681	NC_001134	347518	349584	|gene |CDS[fcd=89](-,339673,340749) note= Ybr053cp;	|gene |tRNA note= GO_component: cytosol [goid 0005829] [evidence NAS] |gene |CDS[fcd=-674](+,347877,349382) note= Ybr056wp;	CGGTTTCCTTAACGAAGGTTATTCCTTCACTATGTATGGCA	CGGAGGAGCTACTAAAGAAAGAGTGCTGCAATTAATACAATTAATATAAGTGTGGTTATTGAAAATAACTATTCATTTATACGGAGGGTTGGCCGAGTGGTCTAAGGCGGCAGACTTAAGATCTGTTGGACGGTTGTCCGCGCGAGTTCGAACCTCGCATCCTTCAGTAATATTTTTTTAATATACATTTTCTCTGCCATCATGGCTTAAAAAATGCTTAAAAGAAGGGAATTAGGGGGGATGGATGAACTAAGACATAACTTTCTTTTCTTCAATTCGAACTCTGTTGGGAAGAGTTGCTTTAAAAAAGACTCTCTATCCATCTATAAAATTTATTAAAACTTTTGAACTGCACAGAATGATTGGCTCACTTAGAAACAAATTTGAGCATTTCAAAGT…
710	721	1	1	0	0	NC_001134	340682	340865	NC_001134	347518	349584	|gene |CDS[fcd=-24](-,339673,340749) note= Ybr053cp;	|gene |tRNA note= GO_component: cytosol [goid 0005829] [evidence NAS] |gene |CDS[fcd=-674](+,347877,349382) note= Ybr056wp;	CGGGAACGTGATAATAAGGTTTTAAATCATGCAAAATAATTTCTTCAAAATCGCCAACACTACTCATTTTACGAAAAGTGTCTAGTTGCTCAATGCATATAAACTTAATCTAAGAATCTTACAGGACATCTTCATATATGTCCATATGCTTTGAATAAGCATTGGCTTCCCCTTAAAGCCCGA	CGGAGGAGCTACTAAAGAAAGAGTGCTGCAATTAATACAATTAATATAAGTGTGGTTATTGAAAATAACTATTCATTTATACGGAGGGTTGGCCGAGTGGTCTAAGGCGGCAGACTTAAGATCTGTTGGACGGTTGTCCGCGCGAGTTCGAACCTCGCATCCTTCAGTAATATTTTTTTAATATACATTTTCTCTGCCATCATGGCTTAAAAAATGCTTAAAAGAAGGGAATTAGGGGGGATGGATGAACTAAGACATAACTTTCTTTTCTTCAATTCGAACTCTGTTGGGAAGAGTTGCTTTAAAAAAGACTCTCTATCCATCTATAAAATTTATTAAAACTTTTGAACTGCACAGAATGATTGGCTCACTTAGAAACAAATTTGAGCATTTCAAAGT…
711	721	29	29	0	0	NC_001134	340866	341648	NC_001134	347518	349584	|neigh_up CDS[fcd=-508](-,339673,340749) note= Ybr053cp; |neigh_down CDS[fcd=1842](+,343099,344133) gene= YRO2 note= Yro2p;	|gene |tRNA note= GO_component: cytosol [goid 0005829] [evidence NAS] |gene |CDS[fcd=-674](+,347877,349382) note= Ybr056wp;	CGGGTAAACTTTCACCTAGCTGTTCTTGGCGACCATTAAATAATTTTGAATGCATTTCTAGGAACAAAATCAAGTGCAAGCTACAGCTTTACAATTATAGAATCTGTTGACCAAGTAAAATGGATGAGAAAATTTACGTACGATTTTGTTCCTTATCCATTCAGCTTCTCAGTTAGTCAAGAGGTAGCTGTAGCGGCTTAACGAAAAAGGTATTAAAAAGGGACATACTTTTTTTATATCTTTTCCTTTGGCGTTCACAGTTACTCTTTTAGAACTCCTTGTTGTTGTGTAATGCATTTACCCATTCCCGATATAACTACCACTTTGGAGAACTGTAGACAAAGACCGCTCTTACTGAGTATACATTTTACTTTCGTAGACCGACTTTTAACTCTATTA…	CGGAGGAGCTACTAAAGAAAGAGTGCTGCAATTAATACAATTAATATAAGTGTGGTTATTGAAAATAACTATTCATTTATACGGAGGGTTGGCCGAGTGGTCTAAGGCGGCAGACTTAAGATCTGTTGGACGGTTGTCCGCGCGAGTTCGAACCTCGCATCCTTCAGTAATATTTTTTTAATATACATTTTCTCTGCCATCATGGCTTAAAAAATGCTTAAAAGAAGGGAATTAGGGGGGATGGATGAACTAAGACATAACTTTCTTTTCTTCAATTCGAACTCTGTTGGGAAGAGTTGCTTTAAAAAAGACTCTCTATCCATCTATAAAATTTATTAAAACTTTTGAACTGCACAGAATGATTGGCTCACTTAGAAACAAATTTGAGCATTTCAAAGT…
712	713	2	2	0	0	NC_001134	341649	341703	NC_001134	341704	341906	|neigh_up CDS[fcd=-927](-,339673,340749) note= Ybr053cp; |neigh_down CDS[fcd=1423](+,343099,344133) gene= YRO2 note= Yro2p;	|neigh_up CDS[fcd=-1056](-,339673,340749) note= Ybr053cp; |neigh_down CDS[fcd=1294](+,343099,344133) gene= YRO2 note= Yro2p;	CGGGTGGCAACCATTCTCCAACATTAGACAAACTTTACAAAGAAGACACCCTAC	CGGTTGCCTCCAAAGCCCTTCTTTCTTAACGCGAGTACCGCTTTGGGAGGCCTCATCTTGGTTGTGTCCTCGTATGGCAGCATCTGCCATTGAGCGAACCCTTTCCCGTTTTACGCGCATGGCCTAGACCGATCTTTAGCAGACATGCCGAGTGAATTTACCTAAGATTTCTAAGGACTCTTCTGCATGTTTCCGAAAATCA
712	721	1493	1493	12	12	NC_001134	341649	341703	NC_001134	347518	349584	|neigh_up CDS[fcd=-927](-,339673,340749) note= Ybr053cp; |neigh_down CDS[fcd=1423](+,343099,344133) gene= YRO2 note= Yro2p;	|gene |tRNA note= GO_component: cytosol [goid 0005829] [evidence NAS] |gene |CDS[fcd=-674](+,347877,349382) note= Ybr056wp;	CGGGTGGCAACCATTCTCCAACATTAGACAAACTTTACAAAGAAGACACCCTAC	CGGAGGAGCTACTAAAGAAAGAGTGCTGCAATTAATACAATTAATATAAGTGTGGTTATTGAAAATAACTATTCATTTATACGGAGGGTTGGCCGAGTGGTCTAAGGCGGCAGACTTAAGATCTGTTGGACGGTTGTCCGCGCGAGTTCGAACCTCGCATCCTTCAGTAATATTTTTTTAATATACATTTTCTCTGCCATCATGGCTTAAAAAATGCTTAAAAGAAGGGAATTAGGGGGGATGGATGAACTAAGACATAACTTTCTTTTCTTCAATTCGAACTCTGTTGGGAAGAGTTGCTTTAAAAAAGACTCTCTATCCATCTATAAAATTTATTAAAACTTTTGAACTGCACAGAATGATTGGCTCACTTAGAAACAAATTTGAGCATTTCAAAGT…
713	712	2	2	0	0	NC_001134	341704	341906	NC_001134	341649	341703	|neigh_up CDS[fcd=-1056](-,339673,340749) note= Ybr053cp; |neigh_down CDS[fcd=1294](+,343099,344133) gene= YRO2 note= Yro2p;	|neigh_up CDS[fcd=-927](-,339673,340749) note= Ybr053cp; |neigh_down CDS[fcd=1423](+,343099,344133) gene= YRO2 note= Yro2p;	CGGTTGCCTCCAAAGCCCTTCTTTCTTAACGCGAGTACCGCTTTGGGAGGCCTCATCTTGGTTGTGTCCTCGTATGGCAGCATCTGCCATTGAGCGAACCCTTTCCCGTTTTACGCGCATGGCCTAGACCGATCTTTAGCAGACATGCCGAGTGAATTTACCTAAGATTTCTAAGGACTCTTCTGCATGTTTCCGAAAATCA	CGGGTGGCAACCATTCTCCAACATTAGACAAACTTTACAAAGAAGACACCCTAC
713	721	1089	1089	0	0	NC_001134	341704	341906	NC_001134	347518	349584	|neigh_up CDS[fcd=-1056](-,339673,340749) note= Ybr053cp; |neigh_down CDS[fcd=1294](+,343099,344133) gene= YRO2 note= Yro2p;	|gene |tRNA note= GO_component: cytosol [goid 0005829] [evidence NAS] |gene |CDS[fcd=-674](+,347877,349382) note= Ybr056wp;	CGGTTGCCTCCAAAGCCCTTCTTTCTTAACGCGAGTACCGCTTTGGGAGGCCTCATCTTGGTTGTGTCCTCGTATGGCAGCATCTGCCATTGAGCGAACCCTTTCCCGTTTTACGCGCATGGCCTAGACCGATCTTTAGCAGACATGCCGAGTGAATTTACCTAAGATTTCTAAGGACTCTTCTGCATGTTTCCGAAAATCA	CGGAGGAGCTACTAAAGAAAGAGTGCTGCAATTAATACAATTAATATAAGTGTGGTTATTGAAAATAACTATTCATTTATACGGAGGGTTGGCCGAGTGGTCTAAGGCGGCAGACTTAAGATCTGTTGGACGGTTGTCCGCGCGAGTTCGAACCTCGCATCCTTCAGTAATATTTTTTTAATATACATTTTCTCTGCCATCATGGCTTAAAAAATGCTTAAAAGAAGGGAATTAGGGGGGATGGATGAACTAAGACATAACTTTCTTTTCTTCAATTCGAACTCTGTTGGGAAGAGTTGCTTTAAAAAAGACTCTCTATCCATCTATAAAATTTATTAAAACTTTTGAACTGCACAGAATGATTGGCTCACTTAGAAACAAATTTGAGCATTTCAAAGT…
714	721	5158	5158	12	12	NC_001134	341907	342114	NC_001134	347518	349584	|neigh_up CDS[fcd=-1261](-,339673,340749) note= Ybr053cp; |neigh_down CDS[fcd=1089](+,343099,344133) gene= YRO2 note= Yro2p;	|gene |tRNA note= GO_component: cytosol [goid 0005829] [evidence NAS] |gene |CDS[fcd=-674](+,347877,349382) note= Ybr056wp;	CGGAAAAACCTTCGGTTTTTTTAGACGAAAACTAGGAAGTTGCTTAGCTTTCCTTGTCGTCTTCAAATCTATATGCCATCGGAAGAGAATCAGAAGAGAAGATCACGACTTAAGAGCTTTGCTGTTAAGATAGCAAGAAAGCTTGCCAATAGGCAGTTATGTAACCTAGTTTATCTACACCTTCTTTGATTAACTTAGCTATGTAGG	CGGAGGAGCTACTAAAGAAAGAGTGCTGCAATTAATACAATTAATATAAGTGTGGTTATTGAAAATAACTATTCATTTATACGGAGGGTTGGCCGAGTGGTCTAAGGCGGCAGACTTAAGATCTGTTGGACGGTTGTCCGCGCGAGTTCGAACCTCGCATCCTTCAGTAATATTTTTTTAATATACATTTTCTCTGCCATCATGGCTTAAAAAATGCTTAAAAGAAGGGAATTAGGGGGGATGGATGAACTAAGACATAACTTTCTTTTCTTCAATTCGAACTCTGTTGGGAAGAGTTGCTTTAAAAAAGACTCTCTATCCATCTATAAAATTTATTAAAACTTTTGAACTGCACAGAATGATTGGCTCACTTAGAAACAAATTTGAGCATTTCAAAGT…
715	721	2125	2125	0	0	NC_001134	342115	342401	NC_001134	347518	349584	|neigh_up CDS[fcd=-1509](-,339673,340749) note= Ybr053cp; |neigh_down CDS[fcd=841](+,343099,344133) gene= YRO2 note= Yro2p;	|gene |tRNA note= GO_component: cytosol [goid 0005829] [evidence NAS] |gene |CDS[fcd=-674](+,347877,349382) note= Ybr056wp;	CGGTGTGTTTGTTCATATCACGGCATACGTTAACACAATGTAAATCTTGCTTTGGGTTGACTGAGGGAAATAACTATAGACATCACACCAATGGCTAAGGGATATTTCGACCTCGCTATGGGTTCTAAATGAGGGAATGGAAAAAAAGGGTAAATTGAAAACAACCTACCGATTTTGGTACCACTTCCGTGATTTTCGATTCTTCAATTTCCGCATAATTTGCCTCAAATAGGAAATCTGAGCTGTTTTTTTCTTACCCTCGAGTGGTCGTTCTGCGGACTTTTCT	CGGAGGAGCTACTAAAGAAAGAGTGCTGCAATTAATACAATTAATATAAGTGTGGTTATTGAAAATAACTATTCATTTATACGGAGGGTTGGCCGAGTGGTCTAAGGCGGCAGACTTAAGATCTGTTGGACGGTTGTCCGCGCGAGTTCGAACCTCGCATCCTTCAGTAATATTTTTTTAATATACATTTTCTCTGCCATCATGGCTTAAAAAATGCTTAAAAGAAGGGAATTAGGGGGGATGGATGAACTAAGACATAACTTTCTTTTCTTCAATTCGAACTCTGTTGGGAAGAGTTGCTTTAAAAAAGACTCTCTATCCATCTATAAAATTTATTAAAACTTTTGAACTGCACAGAATGATTGGCTCACTTAGAAACAAATTTGAGCATTTCAAAGT…
716	721	26	26	0	0	NC_001134	342402	343162	NC_001134	347518	349584	|gene gene= YRO2 |CDS[fcd=317](+,343099,344133) gene= YRO2 note= Yro2p;	|gene |tRNA note= GO_component: cytosol [goid 0005829] [evidence NAS] |gene |CDS[fcd=-674](+,347877,349382) note= Ybr056wp;	CGGTCCAATGCATGAATCCCTTTAAGAAGCATGAAGAAAAAAAAAAATAGCCTCTTGTAAAAGCAAAAATGCCTTTCACTATTTCTGTGTAAACGAATAATTTCGTCATCTTAGTAGTTCACTGGATAATTGTGCTTTCCAATCAGATTAGTTAGTAAAACCCCTAGAAAATTTCAATGTTAGATCGGGATGATTCCTCATCGGGTTGTTGCTTATTCATGATCCTTTCAATTACTGGAAGCTTACCGAAAAGATATATAAAGAACCGAACTTATTCGGTTTACATGTAAGACAGTGTGTTAGTTATGGTTTTCCGCCCTTTTCTTCTCTTGTTTTCTTCGATATTTGTTATTAACCTTTTCTCATTTACGATTATATAATCAAGTGTCAAGATTGTGT…	CGGAGGAGCTACTAAAGAAAGAGTGCTGCAATTAATACAATTAATATAAGTGTGGTTATTGAAAATAACTATTCATTTATACGGAGGGTTGGCCGAGTGGTCTAAGGCGGCAGACTTAAGATCTGTTGGACGGTTGTCCGCGCGAGTTCGAACCTCGCATCCTTCAGTAATATTTTTTTAATATACATTTTCTCTGCCATCATGGCTTAAAAAATGCTTAAAAGAAGGGAATTAGGGGGGATGGATGAACTAAGACATAACTTTCTTTTCTTCAATTCGAACTCTGTTGGGAAGAGTTGCTTTAAAAAAGACTCTCTATCCATCTATAAAATTTATTAAAACTTTTGAACTGCACAGAATGATTGGCTCACTTAGAAACAAATTTGAGCATTTCAAAGT…
717	721	5	5	0	0	NC_001134	343163	346101	NC_001134	347518	349584	|gene gene= YRO2 |CDS(+,343099,344133) gene= YRO2 note= Yro2p; |gene gene= PRP6 note= synonyms: TSM7269, RNA6 |CDS(-,344600,347299) gene= PRP6 note= Prp6p;	|gene |tRNA note= GO_component: cytosol [goid 0005829] [evidence NAS] |gene |CDS[fcd=-674](+,347877,349382) note= Ybr056wp;	CGGTGCTGATTTCCACATTACATCTCGTGGTTCAGACTGGCTTTTCACCGTTTTTTGTGTTAACCTACTATTCGGTGTGATTTTAGTCCCACTAATGTTTAGAAAACCAGTTAAGGACAGATTCGTATATTATACGGCCATTGCTCCAAATTTGTTCATGTCAATTGCTTATTTCACCATGGCTTCTAACTTGGGTTGGATCCCAGTCAGAGCAAAGTACAACCATGTACAAACTTCTACCCAAAAGGAGCACCCAGGTTACAGACAAATTTTTTACGCTAGATACGTTGGCTGGTTTTTGGCTTTCCCATGGCCAATTATTCAAATGTCTCTACTTGGTGGTACTCCATTATGGCAAATTGCTTTCAATGTTGGTATGACTGAAATATTTACTGTCTG…	CGGAGGAGCTACTAAAGAAAGAGTGCTGCAATTAATACAATTAATATAAGTGTGGTTATTGAAAATAACTATTCATTTATACGGAGGGTTGGCCGAGTGGTCTAAGGCGGCAGACTTAAGATCTGTTGGACGGTTGTCCGCGCGAGTTCGAACCTCGCATCCTTCAGTAATATTTTTTTAATATACATTTTCTCTGCCATCATGGCTTAAAAAATGCTTAAAAGAAGGGAATTAGGGGGGATGGATGAACTAAGACATAACTTTCTTTTCTTCAATTCGAACTCTGTTGGGAAGAGTTGCTTTAAAAAAGACTCTCTATCCATCTATAAAATTTATTAAAACTTTTGAACTGCACAGAATGATTGGCTCACTTAGAAACAAATTTGAGCATTTCAAAGT…
718	721	741	741	475	475	NC_001134	346102	346851	NC_001134	347518	349584	|gene gene= PRP6 note= synonyms: TSM7269, RNA6 |CDS[fcd=823](-,344600,347299) gene= PRP6 note= Prp6p;	|gene |tRNA note= GO_component: cytosol [goid 0005829] [evidence NAS] |gene |CDS[fcd=-674](+,347877,349382) note= Ybr056wp;	CGGTTCTTGCGGAAGGATTTTTCTGAAGGAATTCAAAGTCATTTTAGCATTATGATAGCTTTGCAAATTAGTATATGCAGTCAAGAGATCCATACTTTGTGGAATAAATTGTGTGGCTTTCTCTAACATTTTTATAACTTGCGCTTTGTCAGCTTCAAAACTGACAGCTAGCTTCCATAGGCCCTCATCTCGAGGAATCTCTTGCAGTGCTTTTCTCACTACTCTATATTTGTTAACCGTTGTGCTTTCCAAATCAATAGCTTTGAACCAAAGAAGCGGAGACGTTGGATTAAAATTTATTGCCGTTGCCACTAATGTTTTACAGTAGTGAACATCAGATTCGTGTAGTCTAATGTTTTCTAGCCAAATATCGGAGCTTCGAGGGCACTCTTGGCAACC…	CGGAGGAGCTACTAAAGAAAGAGTGCTGCAATTAATACAATTAATATAAGTGTGGTTATTGAAAATAACTATTCATTTATACGGAGGGTTGGCCGAGTGGTCTAAGGCGGCAGACTTAAGATCTGTTGGACGGTTGTCCGCGCGAGTTCGAACCTCGCATCCTTCAGTAATATTTTTTTAATATACATTTTCTCTGCCATCATGGCTTAAAAAATGCTTAAAAGAAGGGAATTAGGGGGGATGGATGAACTAAGACATAACTTTCTTTTCTTCAATTCGAACTCTGTTGGGAAGAGTTGCTTTAAAAAAGACTCTCTATCCATCTATAAAATTTATTAAAACTTTTGAACTGCACAGAATGATTGGCTCACTTAGAAACAAATTTGAGCATTTCAAAGT…
719	721	2856	2856	1233	1233	NC_001134	346852	346929	NC_001134	347518	349584	|gene gene= PRP6 note= synonyms: TSM7269, RNA6 |CDS[fcd=409](-,344600,347299) gene= PRP6 note= Prp6p;	|gene |tRNA note= GO_component: cytosol [goid 0005829] [evidence NAS] |gene |CDS[fcd=-674](+,347877,349382) note= Ybr056wp;	CGGTGCAGCATAAGTTTTTCTGTTTAATTGCTCTTGAATTCTATTTCTCTTGTTTCTTCTTGTAAAATCTGTGGCAT	CGGAGGAGCTACTAAAGAAAGAGTGCTGCAATTAATACAATTAATATAAGTGTGGTTATTGAAAATAACTATTCATTTATACGGAGGGTTGGCCGAGTGGTCTAAGGCGGCAGACTTAAGATCTGTTGGACGGTTGTCCGCGCGAGTTCGAACCTCGCATCCTTCAGTAATATTTTTTTAATATACATTTTCTCTGCCATCATGGCTTAAAAAATGCTTAAAAGAAGGGAATTAGGGGGGATGGATGAACTAAGACATAACTTTCTTTTCTTCAATTCGAACTCTGTTGGGAAGAGTTGCTTTAAAAAAGACTCTCTATCCATCTATAAAATTTATTAAAACTTTTGAACTGCACAGAATGATTGGCTCACTTAGAAACAAATTTGAGCATTTCAAAGT…
719	720	0	0	1	1	NC_001134	346852	346929	NC_001134	346930	347517	|gene gene= PRP6 note= synonyms: TSM7269, RNA6 |CDS[fcd=409](-,344600,347299) gene= PRP6 note= Prp6p;	|gene gene= PRP6 note= synonyms: TSM7269, RNA6 |CDS[fcd=76](-,344600,347299) gene= PRP6 note= Prp6p;	CGGTGCAGCATAAGTTTTTCTGTTTAATTGCTCTTGAATTCTATTTCTCTTGTTTCTTCTTGTAAAATCTGTGGCAT	CGGAATATCCATCCACTCACTCTCCGTTACAGCAGCTAATGATTCTTTCAAATCGGCAAATTGCCGTTTCACGTTTGAAGAATCAACTGAATTGTCATCATCCTTTTCATTAGCTCTTTTCTTTTTCTTTTGTGCTAATTTCAATTCAAGCGTTTTGAATACATTTGCAGCTTCATCATCTTCATCATCTTTCGGTTGGCTTTGAAGATGGTTGTTCAAATTTTCACGGTACCTTTTCGGTATTCTTCTTCCTTTGTCATCATTACTAACCACTTGCTTTTCTTTTGTTGAAAATCCAGTGGCTCCACGACCAATACCTGGTACGTAACCTGCAGGTGGTTCTTGATCCAAAAAAGATGGCCTCTCCATAAAATGTGACGTTTTCTTGCTGTTAAACTC…
720	8225	1	1	0	0	NC_001134	346930	347517	NC_001143	578392	578416	|gene gene= PRP6 note= synonyms: TSM7269, RNA6 |CDS[fcd=76](-,344600,347299) gene= PRP6 note= Prp6p;	|neigh_up CDS[fcd=-639](-,576077,577765) gene= SIS2 note= Sis2p; |neigh_down CDS[fcd=447](+,578851,579318) gene= AIM29 note= Aim29p;	CGGAATATCCATCCACTCACTCTCCGTTACAGCAGCTAATGATTCTTTCAAATCGGCAAATTGCCGTTTCACGTTTGAAGAATCAACTGAATTGTCATCATCCTTTTCATTAGCTCTTTTCTTTTTCTTTTGTGCTAATTTCAATTCAAGCGTTTTGAATACATTTGCAGCTTCATCATCTTCATCATCTTTCGGTTGGCTTTGAAGATGGTTGTTCAAATTTTCACGGTACCTTTTCGGTATTCTTCTTCCTTTGTCATCATTACTAACCACTTGCTTTTCTTTTGTTGAAAATCCAGTGGCTCCACGACCAATACCTGGTACGTAACCTGCAGGTGGTTCTTGATCCAAAAAAGATGGCCTCTCCATAAAATGTGACGTTTTCTTGCTGTTAAACTC…	CGGAAAGCCTATTTCTCACGTTTT
720	744	3	3	0	0	NC_001134	346930	347517	NC_001134	369841	369874	|gene gene= PRP6 note= synonyms: TSM7269, RNA6 |CDS[fcd=76](-,344600,347299) gene= PRP6 note= Prp6p;	|neigh_up CDS[fcd=-181](-,368582,369676) gene= ECM2 note= Ecm2p; |neigh_down CDS[fcd=840](-,370035,370697) gene= NRG2 note= Nrg2p;	CGGAATATCCATCCACTCACTCTCCGTTACAGCAGCTAATGATTCTTTCAAATCGGCAAATTGCCGTTTCACGTTTGAAGAATCAACTGAATTGTCATCATCCTTTTCATTAGCTCTTTTCTTTTTCTTTTGTGCTAATTTCAATTCAAGCGTTTTGAATACATTTGCAGCTTCATCATCTTCATCATCTTTCGGTTGGCTTTGAAGATGGTTGTTCAAATTTTCACGGTACCTTTTCGGTATTCTTCTTCCTTTGTCATCATTACTAACCACTTGCTTTTCTTTTGTTGAAAATCCAGTGGCTCCACGACCAATACCTGGTACGTAACCTGCAGGTGGTTCTTGATCCAAAAAAGATGGCCTCTCCATAAAATGTGACGTTTTCTTGCTGTTAAACTC…	CGGAATGAATAAGGTTTGAAACTTCACGTCCCT
720	11309	1	1	0	0	NC_001134	346930	347517	NC_001146	542449	542472	|gene gene= PRP6 note= synonyms: TSM7269, RNA6 |CDS[fcd=76](-,344600,347299) gene= PRP6 note= Prp6p;	|gene |CDS[fcd=-155](+,542305,542823) note= Ynl046wp;	CGGAATATCCATCCACTCACTCTCCGTTACAGCAGCTAATGATTCTTTCAAATCGGCAAATTGCCGTTTCACGTTTGAAGAATCAACTGAATTGTCATCATCCTTTTCATTAGCTCTTTTCTTTTTCTTTTGTGCTAATTTCAATTCAAGCGTTTTGAATACATTTGCAGCTTCATCATCTTCATCATCTTTCGGTTGGCTTTGAAGATGGTTGTTCAAATTTTCACGGTACCTTTTCGGTATTCTTCTTCCTTTGTCATCATTACTAACCACTTGCTTTTCTTTTGTTGAAAATCCAGTGGCTCCACGACCAATACCTGGTACGTAACCTGCAGGTGGTTCTTGATCCAAAAAAGATGGCCTCTCCATAAAATGTGACGTTTTCTTGCTGTTAAACTC…	CGGTTGAATCCCAGTACAGAATT
720	679	2	2	0	0	NC_001134	346930	347517	NC_001134	315411	315438	|gene gene= PRP6 note= synonyms: TSM7269, RNA6 |CDS[fcd=76](-,344600,347299) gene= PRP6 note= Prp6p;	|neigh_up CDS[fcd=-3527](+,311897,314788) gene= CHS2 note= Chs2p; |neigh_down CDS[fcd=151](+,315575,316510) gene= ATP3 note= Atp3p;	CGGAATATCCATCCACTCACTCTCCGTTACAGCAGCTAATGATTCTTTCAAATCGGCAAATTGCCGTTTCACGTTTGAAGAATCAACTGAATTGTCATCATCCTTTTCATTAGCTCTTTTCTTTTTCTTTTGTGCTAATTTCAATTCAAGCGTTTTGAATACATTTGCAGCTTCATCATCTTCATCATCTTTCGGTTGGCTTTGAAGATGGTTGTTCAAATTTTCACGGTACCTTTTCGGTATTCTTCTTCCTTTGTCATCATTACTAACCACTTGCTTTTCTTTTGTTGAAAATCCAGTGGCTCCACGACCAATACCTGGTACGTAACCTGCAGGTGGTTCTTGATCCAAAAAAGATGGCCTCTCCATAAAATGTGACGTTTTCTTGCTGTTAAACTC…	CGGACCGCAATAACGATTAAAGAAGGC
720	721	16814	16814	6291	6291	NC_001134	346930	347517	NC_001134	347518	349584	|gene gene= PRP6 note= synonyms: TSM7269, RNA6 |CDS[fcd=76](-,344600,347299) gene= PRP6 note= Prp6p;	|gene |tRNA note= GO_component: cytosol [goid 0005829] [evidence NAS] |gene |CDS[fcd=-674](+,347877,349382) note= Ybr056wp;	CGGAATATCCATCCACTCACTCTCCGTTACAGCAGCTAATGATTCTTTCAAATCGGCAAATTGCCGTTTCACGTTTGAAGAATCAACTGAATTGTCATCATCCTTTTCATTAGCTCTTTTCTTTTTCTTTTGTGCTAATTTCAATTCAAGCGTTTTGAATACATTTGCAGCTTCATCATCTTCATCATCTTTCGGTTGGCTTTGAAGATGGTTGTTCAAATTTTCACGGTACCTTTTCGGTATTCTTCTTCCTTTGTCATCATTACTAACCACTTGCTTTTCTTTTGTTGAAAATCCAGTGGCTCCACGACCAATACCTGGTACGTAACCTGCAGGTGGTTCTTGATCCAAAAAAGATGGCCTCTCCATAAAATGTGACGTTTTCTTGCTGTTAAACTC…	CGGAGGAGCTACTAAAGAAAGAGTGCTGCAATTAATACAATTAATATAAGTGTGGTTATTGAAAATAACTATTCATTTATACGGAGGGTTGGCCGAGTGGTCTAAGGCGGCAGACTTAAGATCTGTTGGACGGTTGTCCGCGCGAGTTCGAACCTCGCATCCTTCAGTAATATTTTTTTAATATACATTTTCTCTGCCATCATGGCTTAAAAAATGCTTAAAAGAAGGGAATTAGGGGGGATGGATGAACTAAGACATAACTTTCTTTTCTTCAATTCGAACTCTGTTGGGAAGAGTTGCTTTAAAAAAGACTCTCTATCCATCTATAAAATTTATTAAAACTTTTGAACTGCACAGAATGATTGGCTCACTTAGAAACAAATTTGAGCATTTCAAAGT…
720	719	0	0	1	1	NC_001134	346930	347517	NC_001134	346852	346929	|gene gene= PRP6 note= synonyms: TSM7269, RNA6 |CDS[fcd=76](-,344600,347299) gene= PRP6 note= Prp6p;	|gene gene= PRP6 note= synonyms: TSM7269, RNA6 |CDS[fcd=409](-,344600,347299) gene= PRP6 note= Prp6p;	CGGAATATCCATCCACTCACTCTCCGTTACAGCAGCTAATGATTCTTTCAAATCGGCAAATTGCCGTTTCACGTTTGAAGAATCAACTGAATTGTCATCATCCTTTTCATTAGCTCTTTTCTTTTTCTTTTGTGCTAATTTCAATTCAAGCGTTTTGAATACATTTGCAGCTTCATCATCTTCATCATCTTTCGGTTGGCTTTGAAGATGGTTGTTCAAATTTTCACGGTACCTTTTCGGTATTCTTCTTCCTTTGTCATCATTACTAACCACTTGCTTTTCTTTTGTTGAAAATCCAGTGGCTCCACGACCAATACCTGGTACGTAACCTGCAGGTGGTTCTTGATCCAAAAAAGATGGCCTCTCCATAAAATGTGACGTTTTCTTGCTGTTAAACTC…	CGGTGCAGCATAAGTTTTTCTGTTTAATTGCTCTTGAATTCTATTTCTCTTGTTTCTTCTTGTAAAATCTGTGGCAT
720	13996	0	0	0	1	NC_001134	346930	347517	NC_001224	56847	56862	|gene gene= PRP6 note= synonyms: TSM7269, RNA6 |CDS[fcd=76](-,344600,347299) gene= PRP6 note= Prp6p;	|neigh_up CDS[fcd=-7953](+,48901,50097) gene= VAR1 note= Var1p |neigh_down CDS[fcd=4168](+,61022,61729) gene= SCEI note= Sceip	CGGAATATCCATCCACTCACTCTCCGTTACAGCAGCTAATGATTCTTTCAAATCGGCAAATTGCCGTTTCACGTTTGAAGAATCAACTGAATTGTCATCATCCTTTTCATTAGCTCTTTTCTTTTTCTTTTGTGCTAATTTCAATTCAAGCGTTTTGAATACATTTGCAGCTTCATCATCTTCATCATCTTTCGGTTGGCTTTGAAGATGGTTGTTCAAATTTTCACGGTACCTTTTCGGTATTCTTCTTCCTTTGTCATCATTACTAACCACTTGCTTTTCTTTTGTTGAAAATCCAGTGGCTCCACGACCAATACCTGGTACGTAACCTGCAGGTGGTTCTTGATCCAAAAAAGATGGCCTCTCCATAAAATGTGACGTTTTCTTGCTGTTAAACTC…	CGGTTTCGTAAGAAA
720	7121	0	0	0	1	NC_001134	346930	347517	NC_001142	353675	354319	|gene gene= PRP6 note= synonyms: TSM7269, RNA6 |CDS[fcd=76](-,344600,347299) gene= PRP6 note= Prp6p;	|gene gene= SUP7 gene= SUP7 note= GO_component: cytosol [goid 0005829] [evidence NAS] |neigh_up CDS[fcd=-1616](+,352381,353610) gene= AIM22 note= Aim22p; |neigh_down CDS[fcd=2022](+,356019,357923) note= Yjl045wp;	CGGAATATCCATCCACTCACTCTCCGTTACAGCAGCTAATGATTCTTTCAAATCGGCAAATTGCCGTTTCACGTTTGAAGAATCAACTGAATTGTCATCATCCTTTTCATTAGCTCTTTTCTTTTTCTTTTGTGCTAATTTCAATTCAAGCGTTTTGAATACATTTGCAGCTTCATCATCTTCATCATCTTTCGGTTGGCTTTGAAGATGGTTGTTCAAATTTTCACGGTACCTTTTCGGTATTCTTCTTCCTTTGTCATCATTACTAACCACTTGCTTTTCTTTTGTTGAAAATCCAGTGGCTCCACGACCAATACCTGGTACGTAACCTGCAGGTGGTTCTTGATCCAAAAAAGATGGCCTCTCCATAAAATGTGACGTTTTCTTGCTGTTAAACTC…	CGGAAACTGATTCAGCATATTTCAGCAGACGCGTCCTAGATTCACAGCAAACTTCAATATAAGCGATACATTAGGAGTGTTCGTACTTTAGATCTATAAGAACTATATTTTGTTACGATTCAGCCGTCTCTAAATGTGAACTAAATATTTATACTGTTATTTGAGAAACCGACAGATAGTACTTAATTTTATCGATCATCTAAGAATAGCATCGGTATTGTGGTGACATTTATTGAATTTCTTCCGCTCCAGAATAAAGTTCCTTTTCACTTCAAAAAACTGCCACCAGTAAAGTTGCACCAGTGGTTTTTGAGCATTTTTTGTCAATGTCGCTTAACCGTTCTTGAACTGTATCCTCTTGACGTCGATAAAATCATTTGTAAAAACCAGGCCAAATCA…
721	11002	21	21	1	1	NC_001134	347518	349584	NC_001146	282832	282987	|gene |tRNA note= GO_component: cytosol [goid 0005829] [evidence NAS] |gene |CDS[fcd=-674](+,347877,349382) note= Ybr056wp;	|gene |CDS[fcd=-513](+,282396,283010) note= Ynl190wp;	CGGAGGAGCTACTAAAGAAAGAGTGCTGCAATTAATACAATTAATATAAGTGTGGTTATTGAAAATAACTATTCATTTATACGGAGGGTTGGCCGAGTGGTCTAAGGCGGCAGACTTAAGATCTGTTGGACGGTTGTCCGCGCGAGTTCGAACCTCGCATCCTTCAGTAATATTTTTTTAATATACATTTTCTCTGCCATCATGGCTTAAAAAATGCTTAAAAGAAGGGAATTAGGGGGGATGGATGAACTAAGACATAACTTTCTTTTCTTCAATTCGAACTCTGTTGGGAAGAGTTGCTTTAAAAAAGACTCTCTATCCATCTATAAAATTTATTAAAACTTTTGAACTGCACAGAATGATTGGCTCACTTAGAAACAAATTTGAGCATTTCAAAGT…	CGGTACTCACAAGTATGGTAAGTTCAACAAAACCAAACATGACACTACCACTTATGGTCCTGGTGAAAAGGCCCGTAAGAACAATGCCGCCCCTGGTCCATCTAATTTCAACTCCATAAAATTGTTTGGTGTTACCGCTGGTAGTGCTGCCGTAG
721	1095	63	63	0	0	NC_001134	347518	349584	NC_001134	677638	678390	|gene |tRNA note= GO_component: cytosol [goid 0005829] [evidence NAS] |gene |CDS[fcd=-674](+,347877,349382) note= Ybr056wp;	|gene gene= ROT2 note= synonym: GLS2 |CDS[fcd=1202](-,676352,679216) gene= ROT2 note= Rot2p;	CGGAGGAGCTACTAAAGAAAGAGTGCTGCAATTAATACAATTAATATAAGTGTGGTTATTGAAAATAACTATTCATTTATACGGAGGGTTGGCCGAGTGGTCTAAGGCGGCAGACTTAAGATCTGTTGGACGGTTGTCCGCGCGAGTTCGAACCTCGCATCCTTCAGTAATATTTTTTTAATATACATTTTCTCTGCCATCATGGCTTAAAAAATGCTTAAAAGAAGGGAATTAGGGGGGATGGATGAACTAAGACATAACTTTCTTTTCTTCAATTCGAACTCTGTTGGGAAGAGTTGCTTTAAAAAAGACTCTCTATCCATCTATAAAATTTATTAAAACTTTTGAACTGCACAGAATGATTGGCTCACTTAGAAACAAATTTGAGCATTTCAAAGT…	CGGCAGATCCATAAACCGTTCGAAAAAGGACTTCCAAATCTTTTGGCCATATTTGCTTATGGTATCAATCCATATAGAATTACCTGGCCAGCAATGACCTACATAGTCATTTCCATTGTGATCCTTGACTGCTACATTTTCATTAATTACCCTGTCACTGATTTCATAATCTTTCTTTAAATGAGGATCGATTAGTACGACAAGATTTCTACCCAACTTTTTTAATTTGGATAACAGCCTTTTTGGATTGGGAAAGGAGTGCTGCTTCCAAGTAAAATATTTTTTGTCGTTCGTATACTCCAAGTCCAACCAAATAAAATCGTAAGGAATCATATGAGCATCCATCTGAGAGTCCACTGTGAGAACGTCCATCTCATCATTATAATTCCATCTACATTG…
721	10985	579	579	3	3	NC_001134	347518	349584	NC_001146	276379	276546	|gene |tRNA note= GO_component: cytosol [goid 0005829] [evidence NAS] |gene |CDS[fcd=-674](+,347877,349382) note= Ybr056wp;	|gene gene= CHS1 note= synonym: USA4 |CDS[fcd=41](+,276503,279898) gene= CHS1 note= Chs1p;	CGGAGGAGCTACTAAAGAAAGAGTGCTGCAATTAATACAATTAATATAAGTGTGGTTATTGAAAATAACTATTCATTTATACGGAGGGTTGGCCGAGTGGTCTAAGGCGGCAGACTTAAGATCTGTTGGACGGTTGTCCGCGCGAGTTCGAACCTCGCATCCTTCAGTAATATTTTTTTAATATACATTTTCTCTGCCATCATGGCTTAAAAAATGCTTAAAAGAAGGGAATTAGGGGGGATGGATGAACTAAGACATAACTTTCTTTTCTTCAATTCGAACTCTGTTGGGAAGAGTTGCTTTAAAAAAGACTCTCTATCCATCTATAAAATTTATTAAAACTTTTGAACTGCACAGAATGATTGGCTCACTTAGAAACAAATTTGAGCATTTCAAAGT…	CGGACCTTGCAGTACTGCTTGTTTAAATACGCAGTATACATTTCTTCTTCTTCTTCTCTCTTCTTTCCTTCCTCGAAGAGTCACTAAATTAATACTGGGAAGCCAAACCAAAAAAACTATACAATGAGTGATCAAAATAATCGATCGAGAAATGAATATCACTCAAA
721	2186	2	2	1	1	NC_001134	347518	349584	NC_001136	465117	466044	|gene |tRNA note= GO_component: cytosol [goid 0005829] [evidence NAS] |gene |CDS[fcd=-674](+,347877,349382) note= Ybr056wp;	|gene gene= SNQ2 |CDS[fcd=336](+,465916,470421) gene= SNQ2 note= Snq2p;	CGGAGGAGCTACTAAAGAAAGAGTGCTGCAATTAATACAATTAATATAAGTGTGGTTATTGAAAATAACTATTCATTTATACGGAGGGTTGGCCGAGTGGTCTAAGGCGGCAGACTTAAGATCTGTTGGACGGTTGTCCGCGCGAGTTCGAACCTCGCATCCTTCAGTAATATTTTTTTAATATACATTTTCTCTGCCATCATGGCTTAAAAAATGCTTAAAAGAAGGGAATTAGGGGGGATGGATGAACTAAGACATAACTTTCTTTTCTTCAATTCGAACTCTGTTGGGAAGAGTTGCTTTAAAAAAGACTCTCTATCCATCTATAAAATTTATTAAAACTTTTGAACTGCACAGAATGATTGGCTCACTTAGAAACAAATTTGAGCATTTCAAAGT…	CGGTTGATGCGAGTCAGAGTGGCTCCGCACACAGAGGTTATGTGACCATGGTAACCGTACACATTTTTCCACGGCAAGGAAGTGGCGCGAAAGAAGCACCGCCCTCCACGGATCACCCCATTTGGAAAAGAACGGAGACATAAAAAAAAATTACCTTCACGCCAGACTATGTATGACTCGTAGAAATCTAGCATCCGCGGAGCTATTTTAAGTTTCCGCGGATGCCTTTCGATCCTTTCCCAGTCGTCTGGTTCCGCGCACATATGACTAAATGTCCGCCCATTTCCGTTTAAATCCGTTTTCTATTTTCTTTAGGTCTTTCCATTGTATTCCCTGCAACCCCGCTGGGTATTGGTATTACTAATAGTGACTACGCAACATCAACATATAAAACAAATG…
721	14085	1	6	0	0	NC_001134	347518	349584	YSCPLASM	3866	4585	|gene |tRNA note= GO_component: cytosol [goid 0005829] [evidence NAS] |gene |CDS[fcd=-674](+,347877,349382) note= Ybr056wp;	|repeat_region note= IR1 |misc_binding note= FLP-recombinase binding site B [9] |misc_recomb |mRNA note= REP2 mRNA (minor alt.) |mRNA note= REP2 mRNA (minor alt.) |mRNA note= REP2 mRNA (major alt.) |mRNA note= REP2 mRNA (major alt.) |mRNA note= REP2 mRNA (major alt.) |mRNA note= REP2 mRNA (major alt.) |mRNA note= REP2 mRNA (major alt.) |mRNA note= REP2 mRNA (major alt.) |mRNA note= REP2 mRNA (maj…	CGGAGGAGCTACTAAAGAAAGAGTGCTGCAATTAATACAATTAATATAAGTGTGGTTATTGAAAATAACTATTCATTTATACGGAGGGTTGGCCGAGTGGTCTAAGGCGGCAGACTTAAGATCTGTTGGACGGTTGTCCGCGCGAGTTCGAACCTCGCATCCTTCAGTAATATTTTTTTAATATACATTTTCTCTGCCATCATGGCTTAAAAAATGCTTAAAAGAAGGGAATTAGGGGGGATGGATGAACTAAGACATAACTTTCTTTTCTTCAATTCGAACTCTGTTGGGAAGAGTTGCTTTAAAAAAGACTCTCTATCCATCTATAAAATTTATTAAAACTTTTGAACTGCACAGAATGATTGGCTCACTTAGAAACAAATTTGAGCATTTCAAAGT…	CGGTGCGTTTTTGGTTTTTTGAAAGTGCGTCTTCAGAGCGCTTTTGGTTTTCAAAAGCGCTCTGAAGTTCCTATACTTTCTAGAGAATAGGAACTTCGGAATAGGAACTTCAAAGCGTTTCCGAAAACGAGCGCTTCCGAAAATGCAACGCGAGCTGCGCACATACAGCTCACTGTTCACGTCGCACCTATATCTGCGTGTTGCCTGTATATATATATACATGAGAAGAACGGCATAGTGCGTGTTTATGCTTAAATGCGTACTTATATGCGTCTATTTATGTAGGATGAAAGGTAGTCTAGTACCTCCTGTGATATTATCCCATTCCATGCGGGGTATCGTATGCTTCCTTCAGCACTACCCTTTAGCTGTTCTATATGCTGCCACTCCTCAATTGGA…
721	5477	240	240	14	14	NC_001134	347518	349584	NC_001139	1009350	1009695	|gene |tRNA note= GO_component: cytosol [goid 0005829] [evidence NAS] |gene |CDS[fcd=-674](+,347877,349382) note= Ybr056wp;	|gene gene= RAD2 |CDS[fcd=1250](-,1007677,1010772) gene= RAD2 note= Rad2p;	CGGAGGAGCTACTAAAGAAAGAGTGCTGCAATTAATACAATTAATATAAGTGTGGTTATTGAAAATAACTATTCATTTATACGGAGGGTTGGCCGAGTGGTCTAAGGCGGCAGACTTAAGATCTGTTGGACGGTTGTCCGCGCGAGTTCGAACCTCGCATCCTTCAGTAATATTTTTTTAATATACATTTTCTCTGCCATCATGGCTTAAAAAATGCTTAAAAGAAGGGAATTAGGGGGGATGGATGAACTAAGACATAACTTTCTTTTCTTCAATTCGAACTCTGTTGGGAAGAGTTGCTTTAAAAAAGACTCTCTATCCATCTATAAAATTTATTAAAACTTTTGAACTGCACAGAATGATTGGCTCACTTAGAAACAAATTTGAGCATTTCAAAGT…	CGGCTTAGCGATTTTTGATTTGTCGTCCGCTTCAGGTTTCTTTTCCATCTTAGAAAGTTGCACTGCCTCCATCATTTCAATTTCCTCAATTTGTTTCAGGTAATCCTCATCGTCGTCTTCCACGCTGATTCTGCTAATTCTCATTGTTGGAGTAGTCTTGGAGGGCGATGCCTGATCATGTCTTTTGTCCAAAAACGATTTACTGCCAGCGTTGTTTAGGGATTGGCCCATGTAAGGCAACCTTGCAGCTTTCAAAGAAAAATCTTCCACAAACTTGACGTTCTTGGGCTTGAGTTCAACTTCTTCCCACTCACATTCATCAGAGTCACATCCCTCATCTTCTGA
721	14084	1509	1510	0	0	NC_001134	347518	349584	YSCPLASM	2916	3865	|gene |tRNA note= GO_component: cytosol [goid 0005829] [evidence NAS] |gene |CDS[fcd=-674](+,347877,349382) note= Ybr056wp;	|repeat_region note= IR1 |neigh_up CDS[fcd=-1119](+,2271,2816) |neigh_down CDS[fcd=1808](-,4308,5198)	CGGAGGAGCTACTAAAGAAAGAGTGCTGCAATTAATACAATTAATATAAGTGTGGTTATTGAAAATAACTATTCATTTATACGGAGGGTTGGCCGAGTGGTCTAAGGCGGCAGACTTAAGATCTGTTGGACGGTTGTCCGCGCGAGTTCGAACCTCGCATCCTTCAGTAATATTTTTTTAATATACATTTTCTCTGCCATCATGGCTTAAAAAATGCTTAAAAGAAGGGAATTAGGGGGGATGGATGAACTAAGACATAACTTTCTTTTCTTCAATTCGAACTCTGTTGGGAAGAGTTGCTTTAAAAAAGACTCTCTATCCATCTATAAAATTTATTAAAACTTTTGAACTGCACAGAATGATTGGCTCACTTAGAAACAAATTTGAGCATTTCAAAGT…	CGGTTCATTTTCTGCGTTTCCATCTTGCACTTCAATAGCATATCTTTGTTAACGAAGCATCTGTGCTTCATTTTGTAGAACAAAAATGCAACGCGAGAGCGCTAATTTTTCAAACAAAGAATCTGAGCTGCATTTTTACAGAACAGAAATGCAACGCGAAAGCGCTATTTTACCAACGAAGAATCTGTGCTTCATTTTTGTAAAACAAAAATGCAACGCGAGAGCGCTAATTTTTCAAACAAAGAATCTGAGCTGCATTTTTACAGAACAGAAATGCAACGCGAGAGCGCTATTTTACCAACAAAGAATCTATACTTCTTTTTTGTTCTACAAAAATGCATCCCGAGAGCGCTATTTTTCTAACAAAGCATCTTAGATTACTTTTTTTCTCCTTTGTGC…
721	5479	254	254	0	0	NC_001134	347518	349584	NC_001139	1009952	1010327	|gene |tRNA note= GO_component: cytosol [goid 0005829] [evidence NAS] |gene |CDS[fcd=-674](+,347877,349382) note= Ybr056wp;	|gene gene= RAD2 |CDS[fcd=633](-,1007677,1010772) gene= RAD2 note= Rad2p;	CGGAGGAGCTACTAAAGAAAGAGTGCTGCAATTAATACAATTAATATAAGTGTGGTTATTGAAAATAACTATTCATTTATACGGAGGGTTGGCCGAGTGGTCTAAGGCGGCAGACTTAAGATCTGTTGGACGGTTGTCCGCGCGAGTTCGAACCTCGCATCCTTCAGTAATATTTTTTTAATATACATTTTCTCTGCCATCATGGCTTAAAAAATGCTTAAAAGAAGGGAATTAGGGGGGATGGATGAACTAAGACATAACTTTCTTTTCTTCAATTCGAACTCTGTTGGGAAGAGTTGCTTTAAAAAAGACTCTCTATCCATCTATAAAATTTATTAAAACTTTTGAACTGCACAGAATGATTGGCTCACTTAGAAACAAATTTGAGCATTTCAAAGT…	CGGATATCCTATTGATCACCTCCTCGTTCAGCTTAGACGCTCCACCATCCTGAAACCCAGTAGTGTTGATTAACTTTTGAGTAAAAAAATTCCTCCTTTTCACCATGTCTATTTGAAATCTTGAGAAATCCATACTATTTGGGAAGATGGTCTCCAATTGTTCTTTCGAGTATCCCATCCTCAGTCTTGATTTCAACCTCAACGACGATAATATCAAATACTGTGTGGCCTTTGGCAGCTCTTCAAATTCGGCCGATGCTGGATTTATAGTGTCTAAATCAATGTCTTCCAGTCCATCACCGTTTATCGAATTCATCAGTTTTTCAAAAGTTTTATTAGAGTTAACTCTTGCATCTTCCTTATCGTATTTGAATC
721	14087	143	143	0	0	NC_001134	347518	349584	YSCPLASM	5008	5426	|gene |tRNA note= GO_component: cytosol [goid 0005829] [evidence NAS] |gene |CDS[fcd=-674](+,347877,349382) note= Ybr056wp;	|mRNA note= REP2 mRNA (minor alt.) |mRNA note= REP2 mRNA (minor alt.) |mRNA note= REP2 mRNA (major alt.) |mRNA note= REP2 mRNA (major alt.) |mRNA note= REP2 mRNA (major alt.) |mRNA note= REP2 mRNA (major alt.) |mRNA note= REP2 mRNA (major alt.) |mRNA note= REP2 mRNA (major alt.) |mRNA note= REP2 mRNA (major alt.) |CDS[fcd=-19](-,4308,5198)	CGGAGGAGCTACTAAAGAAAGAGTGCTGCAATTAATACAATTAATATAAGTGTGGTTATTGAAAATAACTATTCATTTATACGGAGGGTTGGCCGAGTGGTCTAAGGCGGCAGACTTAAGATCTGTTGGACGGTTGTCCGCGCGAGTTCGAACCTCGCATCCTTCAGTAATATTTTTTTAATATACATTTTCTCTGCCATCATGGCTTAAAAAATGCTTAAAAGAAGGGAATTAGGGGGGATGGATGAACTAAGACATAACTTTCTTTTCTTCAATTCGAACTCTGTTGGGAAGAGTTGCTTTAAAAAAGACTCTCTATCCATCTATAAAATTTATTAAAACTTTTGAACTGCACAGAATGATTGGCTCACTTAGAAACAAATTTGAGCATTTCAAAGT…	CGGTTGTGAGAGATTCCATGGGCCTTATGACATATCCTGGAAAGAGTAGCTCATCAGACTTACGTTTACTCTCTATATCAATATCTACATCAGGAGCAATCATTTCAATAAACAGCCGACATACATCCCAGACGCTATAAGCTGTACGTGCTTTTACCGTCAGATTCTTGGCTGTTTCAATGTCGTCCATTTTGGTTTTCTTTTACCAGTATTGTTCGTTTGATAATGTATTCTTGCTTATTACATTATAAAATCTGTGCAGATCACATGTCAAAACAACTTTTTATCACAAGATAGTACCGCAAAACGAACCTGCGGGCCGTCTAAAAATTAAGGAAAAGCAGCAAAGGTGCATTTTTAAAATATGAAATGAAGATACCGCAGTACCAATTATTTTCG…
721	14086	24	24	19	19	NC_001134	347518	349584	YSCPLASM	4586	5007	|gene |tRNA note= GO_component: cytosol [goid 0005829] [evidence NAS] |gene |CDS[fcd=-674](+,347877,349382) note= Ybr056wp;	|mRNA note= REP2 mRNA (minor alt.) |mRNA note= REP2 mRNA (minor alt.) |mRNA note= REP2 mRNA (major alt.) |mRNA note= REP2 mRNA (major alt.) |mRNA note= REP2 mRNA (major alt.) |mRNA note= REP2 mRNA (major alt.) |mRNA note= REP2 mRNA (major alt.) |mRNA note= REP2 mRNA (major alt.) |mRNA note= REP2 mRNA (major alt.) |CDS[fcd=402](-,4308,5198)	CGGAGGAGCTACTAAAGAAAGAGTGCTGCAATTAATACAATTAATATAAGTGTGGTTATTGAAAATAACTATTCATTTATACGGAGGGTTGGCCGAGTGGTCTAAGGCGGCAGACTTAAGATCTGTTGGACGGTTGTCCGCGCGAGTTCGAACCTCGCATCCTTCAGTAATATTTTTTTAATATACATTTTCTCTGCCATCATGGCTTAAAAAATGCTTAAAAGAAGGGAATTAGGGGGGATGGATGAACTAAGACATAACTTTCTTTTCTTCAATTCGAACTCTGTTGGGAAGAGTTGCTTTAAAAAAGACTCTCTATCCATCTATAAAATTTATTAAAACTTTTGAACTGCACAGAATGATTGGCTCACTTAGAAACAAATTTGAGCATTTCAAAGT…	CGGGATGAATAAATCACCTATTAAAGCAGCTTGACGATCTGGTGGAACTAAAGTAAGCAATTGGGTAACGACGCTTACGAGCTTCATAACATCTTCTTCCGTTGGAGCTGGTGGGACTAATAACTGTGTACAATCCATTTTTCTCATGAGCATTTCGGTAGCTCTCTTCTTGTCTTTCTCGGGCAATCTTCCTATTATTATAGCAATAGATTTGTATAGTTGCTTTCTATTGTCTAACAGCTTGTTATTCTGTAGCATCAAATCTATGGCAGCCTGACTTGCTTCTTGTGAAGAGAGCATACCATTTCCAATCGAATCAAACCTTTCCTTAACCATCTTCGCAGCAGGCAAAATTACCTCAGCACTGGAGTCAGAAGATACGCTGGAATCTTCTGCGCT…
721	14083	57	57	0	0	NC_001134	347518	349584	YSCPLASM	1816	2915	|gene |tRNA note= GO_component: cytosol [goid 0005829] [evidence NAS] |gene |CDS[fcd=-674](+,347877,349382) note= Ybr056wp;	|mRNA note= Rep1 mRNA (alt.) |mRNA note= Rep1 mRNA (alt.) |mRNA note= Rep1 mRNA (alt.) |mRNA note= Rep1 mRNA (alt.) |mRNA note= Rep1 mRNA (alt.) |mRNA note= Rep1 mRNA (alt.) |CDS(-,887,2008) |mRNA note= D mRNA (alt.; 5' end +/- 3 bp) |mRNA note= D mRNA (alt.; 5' end +/- 3 bp) |CDS(+,2271,2816)	CGGAGGAGCTACTAAAGAAAGAGTGCTGCAATTAATACAATTAATATAAGTGTGGTTATTGAAAATAACTATTCATTTATACGGAGGGTTGGCCGAGTGGTCTAAGGCGGCAGACTTAAGATCTGTTGGACGGTTGTCCGCGCGAGTTCGAACCTCGCATCCTTCAGTAATATTTTTTTAATATACATTTTCTCTGCCATCATGGCTTAAAAAATGCTTAAAAGAAGGGAATTAGGGGGGATGGATGAACTAAGACATAACTTTCTTTTCTTCAATTCGAACTCTGTTGGGAAGAGTTGCTTTAAAAAAGACTCTCTATCCATCTATAAAATTTATTAAAACTTTTGAACTGCACAGAATGATTGGCTCACTTAGAAACAAATTTGAGCATTTCAAAGT…	CGGTGTGTCGTCTGTATTCAGTACATGTCCAACAAATGCAAATGCTAACGTTTTGTATTTCTTATAATTGTCAGGAACTGGAAAAGTCCCCCTTGTCGTCTCGATTACACACCTACTTTCATCGTACACCATAGGTTGGAAGTGCTGCATAATACATTGCTTAATACAAGCAAGCAGTCTCTCGCCATTCATATTTCAGTTATTTTCCATTACAGCTGATGTCATTGTATATCAGCGCTGTAAAAATCTATCTGTTACAGAAGGTTTTCGCGGTTTTTATAAACAAAACTTTCGTTACGAAATCGAGCAATCACCCCAGCTGCGTATTTGGAAATTCGGGAAAAAGTAGAGCAACGCGAGTTGCATTTTTTACACCATAATGCATGATTAACTTCGAGA…
721	35	1	1	0	0	NC_001134	347518	349584	NC_001133	31685	32137	|gene |tRNA note= GO_component: cytosol [goid 0005829] [evidence NAS] |gene |CDS[fcd=-674](+,347877,349382) note= Ybr056wp;	|gene gene= GDH3 note= synonym: FUN51 |CDS[fcd=-343](+,31568,32941) gene= GDH3 note= Gdh3p;	CGGAGGAGCTACTAAAGAAAGAGTGCTGCAATTAATACAATTAATATAAGTGTGGTTATTGAAAATAACTATTCATTTATACGGAGGGTTGGCCGAGTGGTCTAAGGCGGCAGACTTAAGATCTGTTGGACGGTTGTCCGCGCGAGTTCGAACCTCGCATCCTTCAGTAATATTTTTTTAATATACATTTTCTCTGCCATCATGGCTTAAAAAATGCTTAAAAGAAGGGAATTAGGGGGGATGGATGAACTAAGACATAACTTTCTTTTCTTCAATTCGAACTCTGTTGGGAAGAGTTGCTTTAAAAAAGACTCTCTATCCATCTATAAAATTTATTAAAACTTTTGAACTGCACAGAATGATTGGCTCACTTAGAAACAAATTTGAGCATTTCAAAGT…	CGGAGAGGATCATTCAATTCAGGGTCACGTGGGAAAATGATAATGGCGAGCAAGAAGTGGCTCAAGGATACAGGGTGCAGTTCAATTCAGCCAAGGGCCCTTACAAGGGTGGCCTACGCTTCCACCCATCAGTGAACCTGTCTATCCTAAAATTTTTGGGTTTTGAACAGATCTTCAAGAATGCGCTCACTGGGCTAGATATGGGCGGTGGTAAGGGTGGCCTGTGTGTGGACTTGAAAGGCAAGTCTGACAACGAGATCAGAAGGATTTGTTATGCGTTCATGAGAGAACTGAGCAGGCATATTGGTAAGGACACAGACGTGCCCGCAGGAGATATTGGTGTCGGTGGCCGTGAAATTGGCTACCTATTCGGCGCTTACAGATCATACAAGAACTCCT…
721	7623	112	112	0	0	NC_001134	347518	349584	NC_001143	70339	70534	|gene |tRNA note= GO_component: cytosol [goid 0005829] [evidence NAS] |gene |CDS[fcd=-674](+,347877,349382) note= Ybr056wp;	|neigh_up CDS[fcd=-213](-,68274,70223) gene= PTK1 note= Ptk1p; |neigh_down CDS[fcd=3434](-,70739,73870) gene= PEX1 note= Pex1p;	CGGAGGAGCTACTAAAGAAAGAGTGCTGCAATTAATACAATTAATATAAGTGTGGTTATTGAAAATAACTATTCATTTATACGGAGGGTTGGCCGAGTGGTCTAAGGCGGCAGACTTAAGATCTGTTGGACGGTTGTCCGCGCGAGTTCGAACCTCGCATCCTTCAGTAATATTTTTTTAATATACATTTTCTCTGCCATCATGGCTTAAAAAATGCTTAAAAGAAGGGAATTAGGGGGGATGGATGAACTAAGACATAACTTTCTTTTCTTCAATTCGAACTCTGTTGGGAAGAGTTGCTTTAAAAAAGACTCTCTATCCATCTATAAAATTTATTAAAACTTTTGAACTGCACAGAATGATTGGCTCACTTAGAAACAAATTTGAGCATTTCAAAGT…	CGGTGGTATACGGTTGAAAAAAAAAAGAAATAGATATATATATATTTCTTCTTTGTATAGACTTCTGCGAGAAAAAGAAAAGATAAGGAAAAATGAAAAAAAAAGCGTATAGGTGCTAAGAAGAATTAAGTATCAAAAGGTAGCAGGACATTTATGTTATATATGCAACTTCGGATTTCGTTCAATACATCTTGA
721	10974	318	318	2	2	NC_001134	347518	349584	NC_001146	265852	265958	|gene |tRNA note= GO_component: cytosol [goid 0005829] [evidence NAS] |gene |CDS[fcd=-674](+,347877,349382) note= Ybr056wp;	|gene gene= GCR2 |CDS[fcd=626](-,264927,266531) gene= GCR2 note= Gcr2p;	CGGAGGAGCTACTAAAGAAAGAGTGCTGCAATTAATACAATTAATATAAGTGTGGTTATTGAAAATAACTATTCATTTATACGGAGGGTTGGCCGAGTGGTCTAAGGCGGCAGACTTAAGATCTGTTGGACGGTTGTCCGCGCGAGTTCGAACCTCGCATCCTTCAGTAATATTTTTTTAATATACATTTTCTCTGCCATCATGGCTTAAAAAATGCTTAAAAGAAGGGAATTAGGGGGGATGGATGAACTAAGACATAACTTTCTTTTCTTCAATTCGAACTCTGTTGGGAAGAGTTGCTTTAAAAAAGACTCTCTATCCATCTATAAAATTTATTAAAACTTTTGAACTGCACAGAATGATTGGCTCACTTAGAAACAAATTTGAGCATTTCAAAGT…	CGGTCTGAGGATCGAATACTGTAAATATGCTCATTGAGACTAATCGCCACAATTCATCGTTTTCTAATTCTGAGTCTGTCTTTATTTGCCAAAGCCTTCCATCCAA
721	10489	6	6	0	0	NC_001134	347518	349584	NC_001145	808254	808349	|gene |tRNA note= GO_component: cytosol [goid 0005829] [evidence NAS] |gene |CDS[fcd=-674](+,347877,349382) note= Ybr056wp;	|gene gene= CDC65 note= synonyms: SUP70, DNA33 |tRNA gene= CDC65 note= GO_component: cytosol [goid 0005829] [evidence NAS] |neigh_up CDS[fcd=-754](-,806864,807547) gene= URA10 note= Ura10p; |neigh_down CDS[fcd=2475](-,809622,810776) gene= SCS7 note= Scs7p;	CGGAGGAGCTACTAAAGAAAGAGTGCTGCAATTAATACAATTAATATAAGTGTGGTTATTGAAAATAACTATTCATTTATACGGAGGGTTGGCCGAGTGGTCTAAGGCGGCAGACTTAAGATCTGTTGGACGGTTGTCCGCGCGAGTTCGAACCTCGCATCCTTCAGTAATATTTTTTTAATATACATTTTCTCTGCCATCATGGCTTAAAAAATGCTTAAAAGAAGGGAATTAGGGGGGATGGATGAACTAAGACATAACTTTCTTTTCTTCAATTCGAACTCTGTTGGGAAGAGTTGCTTTAAAAAAGACTCTCTATCCATCTATAAAATTTATTAAAACTTTTGAACTGCACAGAATGATTGGCTCACTTAGAAACAAATTTGAGCATTTCAAAGT…	CGGATTCGAACTGGGGTTGTTCGGATCAGAACCGAAAGTGATAACCACTACACTATAGGACCTTTTTCTTCTGTTGTTAGTGTACACTAAAACTT
721	3798	59	59	0	0	NC_001134	347518	349584	NC_001137	374114	374630	|gene |tRNA note= GO_component: cytosol [goid 0005829] [evidence NAS] |gene |CDS[fcd=-674](+,347877,349382) note= Ybr056wp;	|gene gene= GLE2 note= synonym: RAE1 |CDS[fcd=169](-,373444,374541) gene= GLE2 note= Gle2p;	CGGAGGAGCTACTAAAGAAAGAGTGCTGCAATTAATACAATTAATATAAGTGTGGTTATTGAAAATAACTATTCATTTATACGGAGGGTTGGCCGAGTGGTCTAAGGCGGCAGACTTAAGATCTGTTGGACGGTTGTCCGCGCGAGTTCGAACCTCGCATCCTTCAGTAATATTTTTTTAATATACATTTTCTCTGCCATCATGGCTTAAAAAATGCTTAAAAGAAGGGAATTAGGGGGGATGGATGAACTAAGACATAACTTTCTTTTCTTCAATTCGAACTCTGTTGGGAAGAGTTGCTTTAAAAAAGACTCTCTATCCATCTATAAAATTTATTAAAACTTTTGAACTGCACAGAATGATTGGCTCACTTAGAAACAAATTTGAGCATTTCAAAGT…	CGGTTACTATACACTCTGTGTTCGATGGTCCACATTGTACAAAACGTAATACTTTTATTGGCGCAGAATGCATTCCAATTTGCTGTGTTTGACCACTGGCAATATCGTACAATTTCAGGGCATTATCACACCCGCCTGAGGCTACTTTTGTACCATCATTCGACCATCTGGTACATAATACAGGGCTGGAGCTTTCATGCTGCGCTCTACCTTGAGGTACACCATTTTGGACATCCCAAATACGTACCTTACCGTCCCAGGAACTGGCACTAAACATGAAATCTTGTTGCGGTGAAAACGCAATATCCGATATTGAGTCCTCTGCTGGGCTATTAATGACAATATCATTGGCCAAATCCTTTTCATTCGCCATTGCAGTACTCGTTCCCAAAGCTGAGG…
721	1124	3	3	0	0	NC_001134	347518	349584	NC_001134	696703	698789	|gene |tRNA note= GO_component: cytosol [goid 0005829] [evidence NAS] |gene |CDS[fcd=-674](+,347877,349382) note= Ybr056wp;	|gene |CDS(-,695102,697297) note= Ybr238cp; |gene |CDS(-,698349,699938) note= Ybr239cp;	CGGAGGAGCTACTAAAGAAAGAGTGCTGCAATTAATACAATTAATATAAGTGTGGTTATTGAAAATAACTATTCATTTATACGGAGGGTTGGCCGAGTGGTCTAAGGCGGCAGACTTAAGATCTGTTGGACGGTTGTCCGCGCGAGTTCGAACCTCGCATCCTTCAGTAATATTTTTTTAATATACATTTTCTCTGCCATCATGGCTTAAAAAATGCTTAAAAGAAGGGAATTAGGGGGGATGGATGAACTAAGACATAACTTTCTTTTCTTCAATTCGAACTCTGTTGGGAAGAGTTGCTTTAAAAAAGACTCTCTATCCATCTATAAAATTTATTAAAACTTTTGAACTGCACAGAATGATTGGCTCACTTAGAAACAAATTTGAGCATTTCAAAGT…	CGGTGTAGTGAGTAGATCATGATACAGCCCCATTGCTCTACCTATAGAATCCCAAAATAATGGATTAGCGTTAGAATTTGGATGTTCTGAATGGTGTTTCATGTTTTGACGCCTTGGAGTTTGTGACATATAAAGAGTCTGTGAAACGCAATCTTCGAAGGCACAAACCTTATGAAACCATGGGGAGTCTGGGCTAATTGAATTACCTTGATTGGAGTTATTATACTTGCTATGATTATGGTTATTTTGATGATGGTTACGATTGTTATTGTGGTGATGATTACGGTTATTGTTATGATGGTTGTTACTATTATTGCTGTTATTCTGAGCTAGATGATTGTTGTTGTTGGCTCCAATGTTGCCACCAAAGTGAGGAACAAAATGGTTGGCTGGGCTTAC…
721	11930	28	28	0	0	NC_001134	347518	349584	NC_001147	303285	303841	|gene |tRNA note= GO_component: cytosol [goid 0005829] [evidence NAS] |gene |CDS[fcd=-674](+,347877,349382) note= Ybr056wp;	|gene gene= HTZ1 note= synonym: HTA3 |CDS[fcd=421](-,303580,303984) gene= HTZ1 note= Htz1p;	CGGAGGAGCTACTAAAGAAAGAGTGCTGCAATTAATACAATTAATATAAGTGTGGTTATTGAAAATAACTATTCATTTATACGGAGGGTTGGCCGAGTGGTCTAAGGCGGCAGACTTAAGATCTGTTGGACGGTTGTCCGCGCGAGTTCGAACCTCGCATCCTTCAGTAATATTTTTTTAATATACATTTTCTCTGCCATCATGGCTTAAAAAATGCTTAAAAGAAGGGAATTAGGGGGGATGGATGAACTAAGACATAACTTTCTTTTCTTCAATTCGAACTCTGTTGGGAAGAGTTGCTTTAAAAAAGACTCTCTATCCATCTATAAAATTTATTAAAACTTTTGAACTGCACAGAATGATTGGCTCACTTAGAAACAAATTTGAGCATTTCAAAGT…	CGGGTATGCAAAGTTCAACAAAAAGAAAGCCCTGACCAAATTTCTGCGTACATAACGGCTACTGCGCTATCGTTGGGAATATTGTGTGAGAGTATATTTTCATGCTATATATTATAGTAAAAACATAAGAGATTAGACGTGAAAGGAGAGATAGATTACATATATGTATGTATATAACTCGGGTACGGAGAGACAAATTTCAACTTATAATAATGATACAGACGTTAATATGGATAGAATGAGGATACAGGAGCAGGGAGAATTACGGGAAATGGGAAAGAAAAACTATTCTTCTTATTTCTTACTTCCCTTTTTTTCCACTTTCAATAATAATGCTTTATTTATATGAGGCAAAACACCACCTGAAGCAATTGTAGCCCTGATCAAAGAATCTAACTC…
721	2228	4	4	0	0	NC_001134	347518	349584	NC_001136	507466	508207	|gene |tRNA note= GO_component: cytosol [goid 0005829] [evidence NAS] |gene |CDS[fcd=-674](+,347877,349382) note= Ybr056wp;	|gene gene= MRH1 |CDS[fcd=308](+,508144,509106) gene= MRH1 note= Mrh1p;	CGGAGGAGCTACTAAAGAAAGAGTGCTGCAATTAATACAATTAATATAAGTGTGGTTATTGAAAATAACTATTCATTTATACGGAGGGTTGGCCGAGTGGTCTAAGGCGGCAGACTTAAGATCTGTTGGACGGTTGTCCGCGCGAGTTCGAACCTCGCATCCTTCAGTAATATTTTTTTAATATACATTTTCTCTGCCATCATGGCTTAAAAAATGCTTAAAAGAAGGGAATTAGGGGGGATGGATGAACTAAGACATAACTTTCTTTTCTTCAATTCGAACTCTGTTGGGAAGAGTTGCTTTAAAAAAGACTCTCTATCCATCTATAAAATTTATTAAAACTTTTGAACTGCACAGAATGATTGGCTCACTTAGAAACAAATTTGAGCATTTCAAAGT…	CGGCTAGTTCTTAGTGCGGTGAGCAAAAAAAATAGCGTTTTTTTTCCCTCACCAGGACTTTTTTTGTTAACCGAAAATCGGCATCTCTAGTTTTCCTGGACAAAAAAGGCAAAATGGAAATAAACACTCATACGAATCAGTAAAGATGTAAATAATCGCAGTAACGACTGCACAAGGATGTCAGAAAAAGCAGTTTAATTCCAGAAGTGGTTTTCCAATTTATCACACATGTACATGAAGGGAAATGTATAAATACGGTCTTCGTAAAACAAAGGATCTCTTCACCTGGTTTCTTCATTTATAAGTAGTGTCTTTTTCGGTAACTTAAGATATATCCTTATTTCTTTCCCACTTCTCGTTATTTCTTCTTTTTCCCTTTTCAAGTTCTTCTTTTTATTT…
721	2701	9	9	373	373	NC_001134	347518	349584	NC_001136	946389	946424	|gene |tRNA note= GO_component: cytosol [goid 0005829] [evidence NAS] |gene |CDS[fcd=-674](+,347877,349382) note= Ybr056wp;	|gene gene= SUP2 gene= SUP2 note= GO_component: cytosol [goid 0005829] [evidence NAS] |neigh_up CDS[fcd=-1258](-,943670,945148) gene= SNU56 note= Snu56p; |neigh_down CDS[fcd=397](+,946803,948452) gene= AMD2 note= Amd2p;	CGGAGGAGCTACTAAAGAAAGAGTGCTGCAATTAATACAATTAATATAAGTGTGGTTATTGAAAATAACTATTCATTTATACGGAGGGTTGGCCGAGTGGTCTAAGGCGGCAGACTTAAGATCTGTTGGACGGTTGTCCGCGCGAGTTCGAACCTCGCATCCTTCAGTAATATTTTTTTAATATACATTTTCTCTGCCATCATGGCTTAAAAAATGCTTAAAAGAAGGGAATTAGGGGGGATGGATGAACTAAGACATAACTTTCTTTTCTTCAATTCGAACTCTGTTGGGAAGAGTTGCTTTAAAAAAGACTCTCTATCCATCTATAAAATTTATTAAAACTTTTGAACTGCACAGAATGATTGGCTCACTTAGAAACAAATTTGAGCATTTCAAAGT…	CGGGAGATTTTTTTATGTCAAGCACCTACTTTTAG
721	8784	135	135	8	8	NC_001134	347518	349584	NC_001144	390559	390590	|gene |tRNA note= GO_component: cytosol [goid 0005829] [evidence NAS] |gene |CDS[fcd=-674](+,347877,349382) note= Ybr056wp;	|neigh_up CDS[fcd=-303](-,388745,390271) gene= YPS3 note= Yps3p; |neigh_down CDS[fcd=2911](+,393485,393895) note= Ylr125wp;	CGGAGGAGCTACTAAAGAAAGAGTGCTGCAATTAATACAATTAATATAAGTGTGGTTATTGAAAATAACTATTCATTTATACGGAGGGTTGGCCGAGTGGTCTAAGGCGGCAGACTTAAGATCTGTTGGACGGTTGTCCGCGCGAGTTCGAACCTCGCATCCTTCAGTAATATTTTTTTAATATACATTTTCTCTGCCATCATGGCTTAAAAAATGCTTAAAAGAAGGGAATTAGGGGGGATGGATGAACTAAGACATAACTTTCTTTTCTTCAATTCGAACTCTGTTGGGAAGAGTTGCTTTAAAAAAGACTCTCTATCCATCTATAAAATTTATTAAAACTTTTGAACTGCACAGAATGATTGGCTCACTTAGAAACAAATTTGAGCATTTCAAAGT…	CGGCCCCAAATATCCGATTCTCGTTTCTGTG
721	55	1	1	0	0	NC_001134	347518	349584	NC_001133	41087	43002	|gene |tRNA note= GO_component: cytosol [goid 0005829] [evidence NAS] |gene |CDS[fcd=-674](+,347877,349382) note= Ybr056wp;	|gene gene= GPB2 note= synonym: KRH1 |CDS(+,39260,41902) gene= GPB2 note= Gpb2p; |rep_origin note= ARS105 |gene gene= PEX22 note= synonym: YAF5 |CDS(+,42178,42720) gene= PEX22 note= Pex22p; |gene gene= ACS1 note= synonym: FUN44 |CDS(-,42882,45023) gene= ACS1 note= Acs1p;	CGGAGGAGCTACTAAAGAAAGAGTGCTGCAATTAATACAATTAATATAAGTGTGGTTATTGAAAATAACTATTCATTTATACGGAGGGTTGGCCGAGTGGTCTAAGGCGGCAGACTTAAGATCTGTTGGACGGTTGTCCGCGCGAGTTCGAACCTCGCATCCTTCAGTAATATTTTTTTAATATACATTTTCTCTGCCATCATGGCTTAAAAAATGCTTAAAAGAAGGGAATTAGGGGGGATGGATGAACTAAGACATAACTTTCTTTTCTTCAATTCGAACTCTGTTGGGAAGAGTTGCTTTAAAAAAGACTCTCTATCCATCTATAAAATTTATTAAAACTTTTGAACTGCACAGAATGATTGGCTCACTTAGAAACAAATTTGAGCATTTCAAAGT…	CGGTTTTCCCCATGATGGTTCATGGCACGCATCAAGATCTTTTCAATAGTGGCTCTGCGGCACAAGAATCGCCCAAAGCTGGTGCCTCGGCCAGCAGCGCAAGTGCTGCGAGCTTTGATCCCGATATGGACGATAATTTGGAAAATTATATAATCAATCCAGGGAGAAAATCGTCATCTATTCCAATGACTGCGATAGGGAGACAGAGATTAATTTTAAGCCAAGAGAAGCCAGTAGGTAAAACTGTTGTATTGCATGGTGGGTCTAACGGTCTCAACGTTCTTGATGATATGTGGTTGATGGACTTAGAGTGTGAGACATGGACTCCAATAGAGACATTTGCAAAGGCAGATTCGAGCGAAGACGGTGATGAAAAATTGGATAGTGTGAACGTAGGTC…
721	2696	6	6	0	0	NC_001134	347518	349584	NC_001136	941910	942757	|gene |tRNA note= GO_component: cytosol [goid 0005829] [evidence NAS] |gene |CDS[fcd=-674](+,347877,349382) note= Ybr056wp;	|gene |CDS[fcd=1083](-,941053,943416) note= Ydr239cp;	CGGAGGAGCTACTAAAGAAAGAGTGCTGCAATTAATACAATTAATATAAGTGTGGTTATTGAAAATAACTATTCATTTATACGGAGGGTTGGCCGAGTGGTCTAAGGCGGCAGACTTAAGATCTGTTGGACGGTTGTCCGCGCGAGTTCGAACCTCGCATCCTTCAGTAATATTTTTTTAATATACATTTTCTCTGCCATCATGGCTTAAAAAATGCTTAAAAGAAGGGAATTAGGGGGGATGGATGAACTAAGACATAACTTTCTTTTCTTCAATTCGAACTCTGTTGGGAAGAGTTGCTTTAAAAAAGACTCTCTATCCATCTATAAAATTTATTAAAACTTTTGAACTGCACAGAATGATTGGCTCACTTAGAAACAAATTTGAGCATTTCAAAGT…	CGGCACTAAACTTTCTGAAATGGAGTTTAAACTGTTTAACTCGGATGTTTTATTTGATGATTTTGTGTTTCCGTTTGAGTCAAGAGCAGCCAAAACAGTTGATTTAGAGCCTTTTGATATAGAAAGTCCTGACTGGCTAGAGAAGTTTGACTTGGCATCATACTCACCAGATGATGCAGTGTCAAAAGAATGCTTGTCGGTTAGACTGCCCGTATCGTTTACACTATTTAAATAGAAACTAGGGCGATCTTCATTAACCACCCTAAATATTCTACGATGACTTGGTAACTCAGGCTCTTGTGTTGAGACGTCATTTTTTATAGATGAGCCTTGATCACTTGCGTAATTTATAAATGCTTTACTTTCACTATCCACAAAACCTTTTTCCTGAAGACCATC…
721	13571	1	1	0	0	NC_001134	347518	349584	NC_001148	658018	658474	|gene |tRNA note= GO_component: cytosol [goid 0005829] [evidence NAS] |gene |CDS[fcd=-674](+,347877,349382) note= Ybr056wp;	|gene gene= MSF1 |CDS[fcd=-720](+,657526,658935) gene= MSF1 note= Msf1p;	CGGAGGAGCTACTAAAGAAAGAGTGCTGCAATTAATACAATTAATATAAGTGTGGTTATTGAAAATAACTATTCATTTATACGGAGGGTTGGCCGAGTGGTCTAAGGCGGCAGACTTAAGATCTGTTGGACGGTTGTCCGCGCGAGTTCGAACCTCGCATCCTTCAGTAATATTTTTTTAATATACATTTTCTCTGCCATCATGGCTTAAAAAATGCTTAAAAGAAGGGAATTAGGGGGGATGGATGAACTAAGACATAACTTTCTTTTCTTCAATTCGAACTCTGTTGGGAAGAGTTGCTTTAAAAAAGACTCTCTATCCATCTATAAAATTTATTAAAACTTTTGAACTGCACAGAATGATTGGCTCACTTAGAAACAAATTTGAGCATTTCAAAGT…	CGGTATTCCACCAAATGGAAGGAGCCACAATTTGGAAACGAACGAAGGCTGATGTGGGCGTAAAGGAGCCAATGTATATCGAGAAAATCCGTGAAGATATCAGACAGGTAGAGAACCTTTTAAATAAAGAAAATGTAAAGATTACGGTTGACGATGATACTATACCTTTGAAAGAAAATAATCCTAAACAAGAGTATATGTCCGATCTGGAGGTTGATTTGTGCTCTCAACATTTGAAGAGGTCCATTGAACTGATAGTTTCTGAAGTTTTTAACAAAAAAATATCTAGCATGATCAAGAACAAAGCGAATAATACACCCAAAGAGCTAAAAGTCCGTTGGATTAACGCTTACTTCCCCTGGACCGCGCCCTCATGGGAAATAGAGGTTTGGTGGCAGG…
721	2695	22	22	0	0	NC_001134	347518	349584	NC_001136	941847	941909	|gene |tRNA note= GO_component: cytosol [goid 0005829] [evidence NAS] |gene |CDS[fcd=-674](+,347877,349382) note= Ybr056wp;	|gene |CDS[fcd=1538](-,941053,943416) note= Ydr239cp;	CGGAGGAGCTACTAAAGAAAGAGTGCTGCAATTAATACAATTAATATAAGTGTGGTTATTGAAAATAACTATTCATTTATACGGAGGGTTGGCCGAGTGGTCTAAGGCGGCAGACTTAAGATCTGTTGGACGGTTGTCCGCGCGAGTTCGAACCTCGCATCCTTCAGTAATATTTTTTTAATATACATTTTCTCTGCCATCATGGCTTAAAAAATGCTTAAAAGAAGGGAATTAGGGGGGATGGATGAACTAAGACATAACTTTCTTTTCTTCAATTCGAACTCTGTTGGGAAGAGTTGCTTTAAAAAAGACTCTCTATCCATCTATAAAATTTATTAAAACTTTTGAACTGCACAGAATGATTGGCTCACTTAGAAACAAATTTGAGCATTTCAAAGT…	CGGATTTGGTAAATCCACCGTTGCAGGGATAGTAACTGTGTGTTCATTGAACGAGTGAGCAG
721	6544	2	2	0	0	NC_001134	347518	349584	NC_001141	265427	265909	|gene |tRNA note= GO_component: cytosol [goid 0005829] [evidence NAS] |gene |CDS[fcd=-674](+,347877,349382) note= Ybr056wp;	|gene gene= SYG1 |CDS[fcd=2154](-,265114,267822) gene= SYG1 note= Syg1p;	CGGAGGAGCTACTAAAGAAAGAGTGCTGCAATTAATACAATTAATATAAGTGTGGTTATTGAAAATAACTATTCATTTATACGGAGGGTTGGCCGAGTGGTCTAAGGCGGCAGACTTAAGATCTGTTGGACGGTTGTCCGCGCGAGTTCGAACCTCGCATCCTTCAGTAATATTTTTTTAATATACATTTTCTCTGCCATCATGGCTTAAAAAATGCTTAAAAGAAGGGAATTAGGGGGGATGGATGAACTAAGACATAACTTTCTTTTCTTCAATTCGAACTCTGTTGGGAAGAGTTGCTTTAAAAAAGACTCTCTATCCATCTATAAAATTTATTAAAACTTTTGAACTGCACAGAATGATTGGCTCACTTAGAAACAAATTTGAGCATTTCAAAGT…	CGGTAACCCTGAATAGGTGAACATTGGCAACATGTTCATTTTCGACTCTGAAGATGATCCAAACGAATCTTCTTAAAACCTCCAAAAGGGCCAATATAAACGACGTCACAGCACTCTGCTGAATTGTTTGAGGAGCAATTGCGTATACAATCCACTCAAATCTAATGAGGATATCCCAAATCATAGCAAAGTAATAAACTAACTTCCTACTGAATGAATAACTGCCGTTTTCCCAATTTTTTTTACCAGCTAAATACAAGTCGTCTCTTAGCAACCAATTGTAAGAAGTAGTATTGTGAGCAAAGGACCAATCCATAACTAAATCCCAGGCGGAAGTAAGGATCGAATTCAACGTAGCGCACACGATAAAAGGGGTTCTCCTTTGTTCAGAACGGTCTG…
721	537	92	92	0	0	NC_001134	347518	349584	NC_001134	194779	195192	|gene |tRNA note= GO_component: cytosol [goid 0005829] [evidence NAS] |gene |CDS[fcd=-674](+,347877,349382) note= Ybr056wp;	|gene gene= ACH1 |CDS[fcd=-860](+,194125,195705) gene= ACH1 note= Ach1p;	CGGAGGAGCTACTAAAGAAAGAGTGCTGCAATTAATACAATTAATATAAGTGTGGTTATTGAAAATAACTATTCATTTATACGGAGGGTTGGCCGAGTGGTCTAAGGCGGCAGACTTAAGATCTGTTGGACGGTTGTCCGCGCGAGTTCGAACCTCGCATCCTTCAGTAATATTTTTTTAATATACATTTTCTCTGCCATCATGGCTTAAAAAATGCTTAAAAGAAGGGAATTAGGGGGGATGGATGAACTAAGACATAACTTTCTTTTCTTCAATTCGAACTCTGTTGGGAAGAGTTGCTTTAAAAAAGACTCTCTATCCATCTATAAAATTTATTAAAACTTTTGAACTGCACAGAATGATTGGCTCACTTAGAAACAAATTTGAGCATTTCAAAGT…	CGGTTGATCCTGAAAAGGTTGTTGCGATTGTGGAGTCCACCATGAGGGACCAGGTCCCACCAAATACGCCCTCTGACGACATGTCCAGGGCTATTGCAGGTCATTTGGTCGAGTTTTTCAGAAACGAGGTAAAACATGGTAGGCTACCTGAAAACCTGCTGCCTTTACAAAGTGGTATAGGTAACATTGCTAACGCTGTCATTGAAGGGCTTGCTGGCGCCCAATTCAAGCACTTGACTGTATGGACGGAAGTGCTGCAGGACTCGTTCTTGGATCTTTTCGAGAACGGATCTTTGGACTACGCCACTGCTACTTCCGTGAGATTGACTGAAAAGGGTTTCGACAGAGCCTTTGCAAACTGGGAAAATTTCAAACACAGATTGTGTTTGAGATCTCAAG…
721	12619	14	14	0	0	NC_001134	347518	349584	NC_001147	907862	908768	|gene |tRNA note= GO_component: cytosol [goid 0005829] [evidence NAS] |gene |CDS[fcd=-674](+,347877,349382) note= Ybr056wp;	|gene |CDS[fcd=-383](-,907723,907932) note= Yor316c-ap; |rep_origin note= ARS1528	CGGAGGAGCTACTAAAGAAAGAGTGCTGCAATTAATACAATTAATATAAGTGTGGTTATTGAAAATAACTATTCATTTATACGGAGGGTTGGCCGAGTGGTCTAAGGCGGCAGACTTAAGATCTGTTGGACGGTTGTCCGCGCGAGTTCGAACCTCGCATCCTTCAGTAATATTTTTTTAATATACATTTTCTCTGCCATCATGGCTTAAAAAATGCTTAAAAGAAGGGAATTAGGGGGGATGGATGAACTAAGACATAACTTTCTTTTCTTCAATTCGAACTCTGTTGGGAAGAGTTGCTTTAAAAAAGACTCTCTATCCATCTATAAAATTTATTAAAACTTTTGAACTGCACAGAATGATTGGCTCACTTAGAAACAAATTTGAGCATTTCAAAGT…	CGGAGCTGGCGACAGTAAGTGATAAGCGGCCGTTGGCGGCCGTGGGTGAGTTATGCATGGGAACCAGCATGAGCCAGCGATGTTCACTATAAAGAGATTAAATGTAGAAAGTGCTGAGAGACCGATCGATTGGTAAACTTTTCAAAAGGTGGCCTTCTCCACACTTTCTTTTTCCCTCGTTCACTCTGCCTTGATCACATGCTTTTTTCTATGGTTAACTTTGAAAAATTCGTTCCATATCGCCCGCCACAAGTTAAAACCAGATATGCGTGGGATATAGTAGGGTGGACTGTTAAGTTAGCTATAATGGGCTTGTACTCTTTTTGAATACAAAAACCACCTTTCTACACCTTAATACAAGCGGTGGTTGGAAAGCATTCTTGATATATATAATTATAT…
721	538	253	253	0	0	NC_001134	347518	349584	NC_001134	195193	195388	|gene |tRNA note= GO_component: cytosol [goid 0005829] [evidence NAS] |gene |CDS[fcd=-674](+,347877,349382) note= Ybr056wp;	|gene gene= ACH1 |CDS[fcd=-1165](+,194125,195705) gene= ACH1 note= Ach1p;	CGGAGGAGCTACTAAAGAAAGAGTGCTGCAATTAATACAATTAATATAAGTGTGGTTATTGAAAATAACTATTCATTTATACGGAGGGTTGGCCGAGTGGTCTAAGGCGGCAGACTTAAGATCTGTTGGACGGTTGTCCGCGCGAGTTCGAACCTCGCATCCTTCAGTAATATTTTTTTAATATACATTTTCTCTGCCATCATGGCTTAAAAAATGCTTAAAAGAAGGGAATTAGGGGGGATGGATGAACTAAGACATAACTTTCTTTTCTTCAATTCGAACTCTGTTGGGAAGAGTTGCTTTAAAAAAGACTCTCTATCCATCTATAAAATTTATTAAAACTTTTGAACTGCACAGAATGATTGGCTCACTTAGAAACAAATTTGAGCATTTCAAAGT…	CGGAAATGATCCGTAGATTGGGTGTCATCGCCATGAATACCCCAGTAGAAGTTGACATTTACGCGCACGCCAATTCTACAAATGTGAATGGTTCCCGTATGTTGAACGGGTTGGGTGGATCTGCTGATTTCTTGAGAAATGCAAAGTTGTCCATCATGCATGCCCCCTCTGCAAGACCAACTAAAGTAGACCCTA
721	10392	2	2	0	0	NC_001134	347518	349584	NC_001145	704969	705169	|gene |tRNA note= GO_component: cytosol [goid 0005829] [evidence NAS] |gene |CDS[fcd=-674](+,347877,349382) note= Ybr056wp;	|gene gene= TRS130 |CDS[fcd=1817](-,703578,706886) gene= TRS130 note= Trs130p;	CGGAGGAGCTACTAAAGAAAGAGTGCTGCAATTAATACAATTAATATAAGTGTGGTTATTGAAAATAACTATTCATTTATACGGAGGGTTGGCCGAGTGGTCTAAGGCGGCAGACTTAAGATCTGTTGGACGGTTGTCCGCGCGAGTTCGAACCTCGCATCCTTCAGTAATATTTTTTTAATATACATTTTCTCTGCCATCATGGCTTAAAAAATGCTTAAAAGAAGGGAATTAGGGGGGATGGATGAACTAAGACATAACTTTCTTTTCTTCAATTCGAACTCTGTTGGGAAGAGTTGCTTTAAAAAAGACTCTCTATCCATCTATAAAATTTATTAAAACTTTTGAACTGCACAGAATGATTGGCTCACTTAGAAACAAATTTGAGCATTTCAAAGT…	CGGAAACTCCTTTACAAAAGTAATCCCCTCAACAATGATTTCGAAAGAAAGCAGAGAAAATTCACCGTACATGATATCTCTACACTCCAATATTAGTTTATTTTCACCTTTCTTCAAAAGAAAATCACTGGCTCCAAAAACTATCACGTCTCCCCCCATATTTTTCAAAGATAATCTCATTGTTTTTGTACTGATATCCT
721	9835	1	1	0	0	NC_001134	347518	349584	NC_001145	187762	190296	|gene |tRNA note= GO_component: cytosol [goid 0005829] [evidence NAS] |gene |CDS[fcd=-674](+,347877,349382) note= Ybr056wp;	|repeat_region note= Transposon YMLWTY1-1; Long Terminal Repeat (LTR) |gene note= Yml045wp; |LTR note= YMLWDELTA4 |gene gene= RRN11 |CDS[fcd=2738](-,190244,191767) gene= RRN11 note= Rrn11p;	CGGAGGAGCTACTAAAGAAAGAGTGCTGCAATTAATACAATTAATATAAGTGTGGTTATTGAAAATAACTATTCATTTATACGGAGGGTTGGCCGAGTGGTCTAAGGCGGCAGACTTAAGATCTGTTGGACGGTTGTCCGCGCGAGTTCGAACCTCGCATCCTTCAGTAATATTTTTTTAATATACATTTTCTCTGCCATCATGGCTTAAAAAATGCTTAAAAGAAGGGAATTAGGGGGGATGGATGAACTAAGACATAACTTTCTTTTCTTCAATTCGAACTCTGTTGGGAAGAGTTGCTTTAAAAAAGACTCTCTATCCATCTATAAAATTTATTAAAACTTTTGAACTGCACAGAATGATTGGCTCACTTAGAAACAAATTTGAGCATTTCAAAGT…	CGGAAAATAATTCATCGCACAATATTGTTCCTATCAAAACGCCAACTACTGTTTCTGAACAGAATACCGAGGAATCTATCATCGCTGATCTCCCACTCCCTGATCTACCTCCAGAATCTCCTACCGAATTCCCTGACCCATTTAAAGAACTCCCACCGATAAATTCTCATCAAACTAATTCCAGTTTGGGTGGTATTGGTGACTCTAATGCCTATACTACTATCAACAGTAAGAAAAGATCATTAGAAGATAATGAAACTGAAATTAAGGTATCACGAGACACATGGAATACTAAGAATATGCGTAGTTTAGAACCTCCGAGATCGAAGAAACGAATTCACCTGATTGCAGCTGTAAAAGCAGTAAAATCAATCAAACCAATACGGACAACCTTAAGAT…
721	5917	1	1	0	0	NC_001134	347518	349584	NC_001140	278406	278755	|gene |tRNA note= GO_component: cytosol [goid 0005829] [evidence NAS] |gene |CDS[fcd=-674](+,347877,349382) note= Ybr056wp;	|gene gene= NAM8 note= synonyms: MUD15, MRE2 |CDS[fcd=-425](+,278155,279726) gene= NAM8 note= Nam8p;	CGGAGGAGCTACTAAAGAAAGAGTGCTGCAATTAATACAATTAATATAAGTGTGGTTATTGAAAATAACTATTCATTTATACGGAGGGTTGGCCGAGTGGTCTAAGGCGGCAGACTTAAGATCTGTTGGACGGTTGTCCGCGCGAGTTCGAACCTCGCATCCTTCAGTAATATTTTTTTAATATACATTTTCTCTGCCATCATGGCTTAAAAAATGCTTAAAAGAAGGGAATTAGGGGGGATGGATGAACTAAGACATAACTTTCTTTTCTTCAATTCGAACTCTGTTGGGAAGAGTTGCTTTAAAAAAGACTCTCTATCCATCTATAAAATTTATTAAAACTTTTGAACTGCACAGAATGATTGGCTCACTTAGAAACAAATTTGAGCATTTCAAAGT…	CGGATGATGTGGAATAATACGCTTAATAATGGGTCGAGATCATCAATGGGTCCAAAGAATAATCAAGGATATTGCTTTGTTGATTTTCCCTCATCTACTCATGCAGCAAATGCACTTTTAAAGAATGGTATGCTTATACCCAATTTTCCAAATAAAAAATTGAAATTAAACTGGGCTACATCCTCATATTCAAACAGCAACAATTCTCTTAACAACGTGAAGAGTGGTAACAACTGTTCTATATTTGTTGGAGACTTAGCACCAAATGTTACAGAGTCTCAATTATTTGAACTTTTCATTAACAGATATGCTTCTACTTCTCATGCCAAAATTGTGCACGACCAGGTTA
721	4464	8	8	0	0	NC_001134	347518	349584	NC_001139	94418	94817	|gene |tRNA note= GO_component: cytosol [goid 0005829] [evidence NAS] |gene |CDS[fcd=-674](+,347877,349382) note= Ybr056wp;	|gene gene= YPT32 |CDS[fcd=-820](+,93797,94465) gene= YPT32 note= Ypt32p;	CGGAGGAGCTACTAAAGAAAGAGTGCTGCAATTAATACAATTAATATAAGTGTGGTTATTGAAAATAACTATTCATTTATACGGAGGGTTGGCCGAGTGGTCTAAGGCGGCAGACTTAAGATCTGTTGGACGGTTGTCCGCGCGAGTTCGAACCTCGCATCCTTCAGTAATATTTTTTTAATATACATTTTCTCTGCCATCATGGCTTAAAAAATGCTTAAAAGAAGGGAATTAGGGGGGATGGATGAACTAAGACATAACTTTCTTTTCTTCAATTCGAACTCTGTTGGGAAGAGTTGCTTTAAAAAAGACTCTCTATCCATCTATAAAATTTATTAAAACTTTTGAACTGCACAGAATGATTGGCTCACTTAGAAACAAATTTGAGCATTTCAAAGT…	CGGCACCAAAGGAAGACAAGAAGAAAAAATCCAGCAACTGTTGTTAAAAATTTTGTGCCCTACTAAGGTCGCATGGTTTCATGCATATTCTGTCTACATATAACCCCCGTTAATAATGCTTTTATAAATATAATCAATTACATATACCTTCCCAAGTTATTTATTACTAACCTTCGTGCACGCAAGAAAAAATGTATTAACGTACATACATTTTCTAAATAGACCTTTCCTGACGCCTGCATTTTGCAATAGCCGAAGATAAGAATATGATTTTTTTTTTACGATTTAAATATTCTGTTGTTGTGCAGTCTAAAAACACACGTGTATGTTTTTTTCCGCACGCATGAGCAGAATTAGACGGTTTTATAAACGTTCGCTCTGTGTATTTCACGTACCTTC
721	11472	1	1	0	0	NC_001134	347518	349584	NC_001146	687760	688257	|gene |tRNA note= GO_component: cytosol [goid 0005829] [evidence NAS] |gene |CDS[fcd=-674](+,347877,349382) note= Ybr056wp;	|gene gene= ABZ1 |CDS[fcd=-371](+,687637,690000) gene= ABZ1 note= Abz1p;	CGGAGGAGCTACTAAAGAAAGAGTGCTGCAATTAATACAATTAATATAAGTGTGGTTATTGAAAATAACTATTCATTTATACGGAGGGTTGGCCGAGTGGTCTAAGGCGGCAGACTTAAGATCTGTTGGACGGTTGTCCGCGCGAGTTCGAACCTCGCATCCTTCAGTAATATTTTTTTAATATACATTTTCTCTGCCATCATGGCTTAAAAAATGCTTAAAAGAAGGGAATTAGGGGGGATGGATGAACTAAGACATAACTTTCTTTTCTTCAATTCGAACTCTGTTGGGAAGAGTTGCTTTAAAAAAGACTCTCTATCCATCTATAAAATTTATTAAAACTTTTGAACTGCACAGAATGATTGGCTCACTTAGAAACAAATTTGAGCATTTCAAAGT…	CGGGAGTCAACGCCGTGCACGTGACGACGGTACATAGTGATACGTTCCAATCTATGGATCAGCTATTGCCACTTTTGCCGCTTTTTGATGCTATCGTTGTTGGCCCAGGACCTGGGAATCCCAACAATGGTGCACAAGATATGGGTATAATATCTGAGCTTTTCGAGAATGCCAATGGAAAGTTAGATGAAGTTCCAATATTGGGTATATGTCTTGGGTTCCAAGCAATGTGCTTGGCTCAAGGTGCTGATGTCAGTGAGCTAAATACTATCAAGCATGGGCAAGTGTATGAAATGCATTTAAACGATGCAGCCAGAGCTTGTGGCCTTTTTTCTGGTTATCCCGATACGTTCAAATCTACGAGGTACCATTCATTGCATGTCAATGCCGAAGGCATTG…
721	12023	1	1	0	0	NC_001134	347518	349584	NC_001147	386945	386988	|gene |tRNA note= GO_component: cytosol [goid 0005829] [evidence NAS] |gene |CDS[fcd=-674](+,347877,349382) note= Ybr056wp;	|gene gene= DFG16 note= synonyms: ZRG11, ECM41 |CDS[fcd=-141](+,386825,388684) gene= DFG16 note= Dfg16p;	CGGAGGAGCTACTAAAGAAAGAGTGCTGCAATTAATACAATTAATATAAGTGTGGTTATTGAAAATAACTATTCATTTATACGGAGGGTTGGCCGAGTGGTCTAAGGCGGCAGACTTAAGATCTGTTGGACGGTTGTCCGCGCGAGTTCGAACCTCGCATCCTTCAGTAATATTTTTTTAATATACATTTTCTCTGCCATCATGGCTTAAAAAATGCTTAAAAGAAGGGAATTAGGGGGGATGGATGAACTAAGACATAACTTTCTTTTCTTCAATTCGAACTCTGTTGGGAAGAGTTGCTTTAAAAAAGACTCTCTATCCATCTATAAAATTTATTAAAACTTTTGAACTGCACAGAATGATTGGCTCACTTAGAAACAAATTTGAGCATTTCAAAGT…	CGGGACATAAACTTGGTGATGAAAGACCACCGCATTACGACCA
721	4475	23	23	2961	2961	NC_001134	347518	349584	NC_001139	102626	102808	|gene |tRNA note= GO_component: cytosol [goid 0005829] [evidence NAS] |gene |CDS[fcd=-674](+,347877,349382) note= Ybr056wp;	|gene gene= CHC1 note= synonym: SWA5 |CDS[fcd=4791](-,102547,107508) gene= CHC1 note= Chc1p;	CGGAGGAGCTACTAAAGAAAGAGTGCTGCAATTAATACAATTAATATAAGTGTGGTTATTGAAAATAACTATTCATTTATACGGAGGGTTGGCCGAGTGGTCTAAGGCGGCAGACTTAAGATCTGTTGGACGGTTGTCCGCGCGAGTTCGAACCTCGCATCCTTCAGTAATATTTTTTTAATATACATTTTCTCTGCCATCATGGCTTAAAAAATGCTTAAAAGAAGGGAATTAGGGGGGATGGATGAACTAAGACATAACTTTCTTTTCTTCAATTCGAACTCTGTTGGGAAGAGTTGCTTTAAAAAAGACTCTCTATCCATCTATAAAATTTATTAAAACTTTTGAACTGCACAGAATGATTGGCTCACTTAGAAACAAATTTGAGCATTTCAAAGT…	CGGACTTTTTAGCGAGTTCTTCGGTGATTTTCTTAATGGAATCATTCTGCTCTTTTTTTATGGAGATTTCAAATGGCTTAATGTAGTCCTCCAAAGAATTCATCCATGATATTTCTAAAACAAATTCAATTCTCACTAAGTTGTAAGCAGCATATAGCAAAGCAACAAAGCCTTCTCTGTTA
721	12605	5	5	0	0	NC_001134	347518	349584	NC_001147	891130	892782	|gene |tRNA note= GO_component: cytosol [goid 0005829] [evidence NAS] |gene |CDS[fcd=-674](+,347877,349382) note= Ybr056wp;	|gene gene= MCH5 |CDS(-,889865,891430) gene= MCH5 note= Mch5p; |gene gene= SLY41 |CDS(-,892728,894089) gene= SLY41 note= Sly41p;	CGGAGGAGCTACTAAAGAAAGAGTGCTGCAATTAATACAATTAATATAAGTGTGGTTATTGAAAATAACTATTCATTTATACGGAGGGTTGGCCGAGTGGTCTAAGGCGGCAGACTTAAGATCTGTTGGACGGTTGTCCGCGCGAGTTCGAACCTCGCATCCTTCAGTAATATTTTTTTAATATACATTTTCTCTGCCATCATGGCTTAAAAAATGCTTAAAAGAAGGGAATTAGGGGGGATGGATGAACTAAGACATAACTTTCTTTTCTTCAATTCGAACTCTGTTGGGAAGAGTTGCTTTAAAAAAGACTCTCTATCCATCTATAAAATTTATTAAAACTTTTGAACTGCACAGAATGATTGGCTCACTTAGAAACAAATTTGAGCATTTCAAAGT…	CGGGAAGCTTTCAATTTCTTCATTGGAATCTTCTTCTTTGTCACTGTCGTGCGTGCTCGAGGTATTTTCACCCCAATGTGGTTGGCTTTCAATGTCAGTTCCTTTATTTACTTCCTTCTTGGTATACACCTTTGCCGACACCGACGTTGACGCGTAAGAGGCAGTAGTCTCTAATGACTCTAAATCATCAGCTTCTGGATCATAATGTATGCTATCCTCATCTAAATCAGGTTGCCGCAGTTGGTTGGTTTGTTCTTCTGGAACTATAGTGTCTTTAGGCGTTAAACTGTCTGAGCTCATTATTTTTCTTTTTAATCTATAGTAAAATCAGAGCTTTTTAATCGATAGTATGCCCCCGTGATCTTAGTTATTCAGATCTTAGTATGTTTTTACAGATAT…
721	4453	2	2	0	0	NC_001134	347518	349584	NC_001139	86816	87109	|gene |tRNA note= GO_component: cytosol [goid 0005829] [evidence NAS] |gene |CDS[fcd=-674](+,347877,349382) note= Ybr056wp;	|gene gene= KIP3 |CDS[fcd=-2078](+,84884,87301) gene= KIP3 note= Kip3p;	CGGAGGAGCTACTAAAGAAAGAGTGCTGCAATTAATACAATTAATATAAGTGTGGTTATTGAAAATAACTATTCATTTATACGGAGGGTTGGCCGAGTGGTCTAAGGCGGCAGACTTAAGATCTGTTGGACGGTTGTCCGCGCGAGTTCGAACCTCGCATCCTTCAGTAATATTTTTTTAATATACATTTTCTCTGCCATCATGGCTTAAAAAATGCTTAAAAGAAGGGAATTAGGGGGGATGGATGAACTAAGACATAACTTTCTTTTCTTCAATTCGAACTCTGTTGGGAAGAGTTGCTTTAAAAAAGACTCTCTATCCATCTATAAAATTTATTAAAACTTTTGAACTGCACAGAATGATTGGCTCACTTAGAAACAAATTTGAGCATTTCAAAGT…	CGGGTTTGAACTCCCGATTTAAATTTCTATCAAAGTGGCTGATGAATAGGACACCTAACATTGAATCCATAATTCAAGACCTGGTTCATATCGACGAGGAGTTTGAATCTTTTGCCAGAACTTTTATCGCCAATCCCGATAGCAATTTTACAAACACAAATATAAATATAATAAACACGACGGCAGCTGACTTGGCTGTTCCCGCTGAGACCCTACAACGGCAAAATTTTTCCCAAAAAAAAGTAAAGTGGACGAGTCCCGACCTTAGTCCCAGCCCTATGATTGAACCACAA
721	10377	3	3	0	0	NC_001134	347518	349584	NC_001145	695502	695811	|gene |tRNA note= GO_component: cytosol [goid 0005829] [evidence NAS] |gene |CDS[fcd=-674](+,347877,349382) note= Ybr056wp;	|gene gene= SCJ1 |CDS[fcd=-307](+,695349,696482) gene= SCJ1 note= Scj1p;	CGGAGGAGCTACTAAAGAAAGAGTGCTGCAATTAATACAATTAATATAAGTGTGGTTATTGAAAATAACTATTCATTTATACGGAGGGTTGGCCGAGTGGTCTAAGGCGGCAGACTTAAGATCTGTTGGACGGTTGTCCGCGCGAGTTCGAACCTCGCATCCTTCAGTAATATTTTTTTAATATACATTTTCTCTGCCATCATGGCTTAAAAAATGCTTAAAAGAAGGGAATTAGGGGGGATGGATGAACTAAGACATAACTTTCTTTTCTTCAATTCGAACTCTGTTGGGAAGAGTTGCTTTAAAAAAGACTCTCTATCCATCTATAAAATTTATTAAAACTTTTGAACTGCACAGAATGATTGGCTCACTTAGAAACAAATTTGAGCATTTCAAAGT…	CGGATAAAAATGCTGGGAGCGAAGAAGCCCATCAAAAATTCATTGAAGTCGGCGAGGCATACGATGTATTGAGCGATCCTGAAAAGAAAAAGATTTATGACCAGTTTGGTGCAGATGCTGTAAAGAATGGCGGTGGCGGTGGCGGTCCAGGAGGCCCTGGCGCAGGTGGATTCCACGATCCGTTTGACATATTCGAACGGATGTTTCAAGGAGGTCATGGAGGTCCTGGCGGCGGATTTGGCCAGAGACAGAGGCAGCGTGGTCCAATGATCAAGGTCCAGGAAAAACTATCTTTAAAGCAGTTTTATT
721	11460	1	1	0	0	NC_001134	347518	349584	NC_001146	676372	676589	|gene |tRNA note= GO_component: cytosol [goid 0005829] [evidence NAS] |gene |CDS[fcd=-674](+,347877,349382) note= Ybr056wp;	|gene gene= CPR8 |CDS[fcd=-301](+,676179,677105) gene= CPR8 note= Cpr8p;	CGGAGGAGCTACTAAAGAAAGAGTGCTGCAATTAATACAATTAATATAAGTGTGGTTATTGAAAATAACTATTCATTTATACGGAGGGTTGGCCGAGTGGTCTAAGGCGGCAGACTTAAGATCTGTTGGACGGTTGTCCGCGCGAGTTCGAACCTCGCATCCTTCAGTAATATTTTTTTAATATACATTTTCTCTGCCATCATGGCTTAAAAAATGCTTAAAAGAAGGGAATTAGGGGGGATGGATGAACTAAGACATAACTTTCTTTTCTTCAATTCGAACTCTGTTGGGAAGAGTTGCTTTAAAAAAGACTCTCTATCCATCTATAAAATTTATTAAAACTTTTGAACTGCACAGAATGATTGGCTCACTTAGAAACAAATTTGAGCATTTCAAAGT…	CGGCCGTCTCATAACAATAGACTTATACGGGACTATGGTGCCCAAGACAGTAATGACTTTTTGCCAGTATGTTGATAGTGTAAAAGATCGCCTTGCTTCCCGTCACAGTTACTCGCCAGAACGCGATTTTGATAAAATTCTACCGAATGGAGCTATAGAAGGTAGCTCCGTTTCTTCCTCCTCTATTGAAGAAACGGAAATGTTGGCTCCAAAACTC
721	10921	1	1	34	34	NC_001134	347518	349584	NC_001146	228269	228351	|gene |tRNA note= GO_component: cytosol [goid 0005829] [evidence NAS] |gene |CDS[fcd=-674](+,347877,349382) note= Ybr056wp;	|gene gene= ATG4 note= synonyms: AUT2, APG4 |CDS[fcd=-939](+,227371,228855) gene= ATG4 note= Atg4p;	CGGAGGAGCTACTAAAGAAAGAGTGCTGCAATTAATACAATTAATATAAGTGTGGTTATTGAAAATAACTATTCATTTATACGGAGGGTTGGCCGAGTGGTCTAAGGCGGCAGACTTAAGATCTGTTGGACGGTTGTCCGCGCGAGTTCGAACCTCGCATCCTTCAGTAATATTTTTTTAATATACATTTTCTCTGCCATCATGGCTTAAAAAATGCTTAAAAGAAGGGAATTAGGGGGGATGGATGAACTAAGACATAACTTTCTTTTCTTCAATTCGAACTCTGTTGGGAAGAGTTGCTTTAAAAAAGACTCTCTATCCATCTATAAAATTTATTAAAACTTTTGAACTGCACAGAATGATTGGCTCACTTAGAAACAAATTTGAGCATTTCAAAGT…	CGGCGGTAGGCCGTCTTCATCGTTGTATTTTTTTGGTTATCAAGGAAATGAATTTTTACATTTCGATCCTCATATTCCTCAA
721	2249	1	265	0	3	NC_001134	347518	349584	NC_001136	526883	527663	|gene |tRNA note= GO_component: cytosol [goid 0005829] [evidence NAS] |gene |CDS[fcd=-674](+,347877,349382) note= Ybr056wp;	|gene gene= KRS1 note= synonym: GCD5 |CDS(+,525437,527212) gene= KRS1 note= Krs1p; |gene gene= ENA5 |CDS(-,527419,530694) gene= ENA5 note= Ena5p;	CGGAGGAGCTACTAAAGAAAGAGTGCTGCAATTAATACAATTAATATAAGTGTGGTTATTGAAAATAACTATTCATTTATACGGAGGGTTGGCCGAGTGGTCTAAGGCGGCAGACTTAAGATCTGTTGGACGGTTGTCCGCGCGAGTTCGAACCTCGCATCCTTCAGTAATATTTTTTTAATATACATTTTCTCTGCCATCATGGCTTAAAAAATGCTTAAAAGAAGGGAATTAGGGGGGATGGATGAACTAAGACATAACTTTCTTTTCTTCAATTCGAACTCTGTTGGGAAGAGTTGCTTTAAAAAAGACTCTCTATCCATCTATAAAATTTATTAAAACTTTTGAACTGCACAGAATGATTGGCTCACTTAGAAACAAATTTGAGCATTTCAAAGT…	CGGGTCTATGTGAGCGTTTCGAGGTCTTTGTAGCTACAAAGGAAATTTGTAATGCCTACACTGAATTGAACGATCCATTTGACCAAAGGGCACGTTTCGAAGAACAAGCTAGACAAAAGGATCAAGGTGATGACGAAGCTCAATTAGTCGATGAAACCTTCTGTAATGCTCTAGAATACGGTTTACCACCAACTGGTGGTTGGGGTTGTGGTATTGATAGACTGGCCATGTTCTTGACCGACTCCAACACCATTAGAGAAGTCTTATTGTTCCCAACTTTGAAGCCTGATGTTTTGAGAGAGGAAGTCAAAAAGGAAGAAGAAAATTAAGCTAAAAGATATTAGAACATATTGTATAATGTAAGTATTATTATTCTAAGATAGAGCTTGAATATGAAAA…
721	3745	813	813	0	0	NC_001134	347518	349584	NC_001137	336694	337286	|gene |tRNA note= GO_component: cytosol [goid 0005829] [evidence NAS] |gene |CDS[fcd=-674](+,347877,349382) note= Ybr056wp;	|gene gene= PTC2 |CDS[fcd=346](-,335942,337336) gene= PTC2 note= Ptc2p;	CGGAGGAGCTACTAAAGAAAGAGTGCTGCAATTAATACAATTAATATAAGTGTGGTTATTGAAAATAACTATTCATTTATACGGAGGGTTGGCCGAGTGGTCTAAGGCGGCAGACTTAAGATCTGTTGGACGGTTGTCCGCGCGAGTTCGAACCTCGCATCCTTCAGTAATATTTTTTTAATATACATTTTCTCTGCCATCATGGCTTAAAAAATGCTTAAAAGAAGGGAATTAGGGGGGATGGATGAACTAAGACATAACTTTCTTTTCTTCAATTCGAACTCTGTTGGGAAGAGTTGCTTTAAAAAAGACTCTCTATCCATCTATAAAATTTATTAAAACTTTTGAACTGCACAGAATGATTGGCTCACTTAGAAACAAATTTGAGCATTTCAAAGT…	CGGAACACATGTCACTATTTGCTCCTCGGGGCCCAATTTGGGGTTGGATTTGAACTCAAAATCACCAATGGCACGAGAGAGCGCCAAGTTACCGTTGACCCTATCCATTTCTACGAAGCCATCAGCTGCCACAATACGTGATTTTTCGCTTGCTAGAGTGGGCTTGTGATCGTATGATAATGCCTTTGCGTTCCCGTCGGTGGCGAGTACGGTTCTACTGTCACCAGCGTTACCACATACTAACAAGTTCTGGGACTTTGATACTAATATGGATGTAGCCGTACATCCGCTATGGTCTTCTTTCATCACAGGATCTTGTAACAGTTTCACGTCTGTGTTTATGAAAGTATCAATCAAAGCCCTTGGTAAATTTCCTTCATGGAACGATTTCTGCTCTTG…
721	12584	2	2	0	0	NC_001134	347518	349584	NC_001147	868751	870036	|gene |tRNA note= GO_component: cytosol [goid 0005829] [evidence NAS] |gene |CDS[fcd=-674](+,347877,349382) note= Ybr056wp;	|gene gene= RRS1 |CDS(+,868339,868950) gene= RRS1 note= Rrs1p; |gene gene= UAF30 |CDS(+,869207,869893) gene= UAF30 note= Uaf30p;	CGGAGGAGCTACTAAAGAAAGAGTGCTGCAATTAATACAATTAATATAAGTGTGGTTATTGAAAATAACTATTCATTTATACGGAGGGTTGGCCGAGTGGTCTAAGGCGGCAGACTTAAGATCTGTTGGACGGTTGTCCGCGCGAGTTCGAACCTCGCATCCTTCAGTAATATTTTTTTAATATACATTTTCTCTGCCATCATGGCTTAAAAAATGCTTAAAAGAAGGGAATTAGGGGGGATGGATGAACTAAGACATAACTTTCTTTTCTTCAATTCGAACTCTGTTGGGAAGAGTTGCTTTAAAAAAGACTCTCTATCCATCTATAAAATTTATTAAAACTTTTGAACTGCACAGAATGATTGGCTCACTTAGAAACAAATTTGAGCATTTCAAAGT…	CGGTGAATGGGTTCCAAAGTGGGGCTACAAGGGCGCAAATAAGAAGTTAGATGATCAATGGTTGGTGGAAGTTGATGATAAAGTAAAAGGCACTGACAATGAATTGATCGATCCAAGAACTTTGAATAGGGCAGAAAGAAAACGTTTAGTCAAGAAGAACGAAAAACAACAAAGGAGAAATATGAAGAATGCCTTATGATAGTGAAAGACGTTGTTGCTTCCTACTTGCGTCCCCAATCGATCCGCTAACCTTTTTTTTAACTACAGCATAACCTCACATCTACGTATCCTTACATCTATAATATTTTTAAATAATTGTAAATTAGAAAAACATCAAAATTCCGTTCTATATTTTGATACATTTTTTTGCAGTAGTCCAAGATGAGATCAGAATAAGAT…
721	8710	4	4	0	0	NC_001134	347518	349584	NC_001144	328612	329465	|gene |tRNA note= GO_component: cytosol [goid 0005829] [evidence NAS] |gene |CDS[fcd=-674](+,347877,349382) note= Ybr056wp;	|gene gene= GIS3 |CDS[fcd=201](-,327731,329239) gene= GIS3 note= Gis3p;	CGGAGGAGCTACTAAAGAAAGAGTGCTGCAATTAATACAATTAATATAAGTGTGGTTATTGAAAATAACTATTCATTTATACGGAGGGTTGGCCGAGTGGTCTAAGGCGGCAGACTTAAGATCTGTTGGACGGTTGTCCGCGCGAGTTCGAACCTCGCATCCTTCAGTAATATTTTTTTAATATACATTTTCTCTGCCATCATGGCTTAAAAAATGCTTAAAAGAAGGGAATTAGGGGGGATGGATGAACTAAGACATAACTTTCTTTTCTTCAATTCGAACTCTGTTGGGAAGAGTTGCTTTAAAAAAGACTCTCTATCCATCTATAAAATTTATTAAAACTTTTGAACTGCACAGAATGATTGGCTCACTTAGAAACAAATTTGAGCATTTCAAAGT…	CGGCTCAGCCAGTACCTCATCGCCAATCGCGGGGGTCTGCAAATCGACAGCGTCAGCAATATCATCTGTCAAGGGATGAAGTTTAGAGGAGCTCAATGAAGAACAGTCGCTTTGAGCTTCCTCGGAGAACTTCCTCTTTATGCTCTGTGTTAAGTGGCCCTCATGTATGGGGCATTCGCCCGATAACGTCTTGGCGGAATTTGTTTTCCTAACTTGCGACATGACCGAGCTTAAGGACGGGGTCATCAAAGATGAGCGATTTTCGTTCAGCAGTTCGGAATCGTCTCGAGCCTTCAGTATTCTAGTCCTCTTGAAGCTATTCCTCTTGGTTAGTGTTCTAGTACGTTCAGCGCTTCCTTGACCATCGAACTGCGGCTTAGTGGAGTGGAAATAAATCTC…
721	8225	1	1	0	0	NC_001134	347518	349584	NC_001143	578392	578416	|gene |tRNA note= GO_component: cytosol [goid 0005829] [evidence NAS] |gene |CDS[fcd=-674](+,347877,349382) note= Ybr056wp;	|neigh_up CDS[fcd=-639](-,576077,577765) gene= SIS2 note= Sis2p; |neigh_down CDS[fcd=447](+,578851,579318) gene= AIM29 note= Aim29p;	CGGAGGAGCTACTAAAGAAAGAGTGCTGCAATTAATACAATTAATATAAGTGTGGTTATTGAAAATAACTATTCATTTATACGGAGGGTTGGCCGAGTGGTCTAAGGCGGCAGACTTAAGATCTGTTGGACGGTTGTCCGCGCGAGTTCGAACCTCGCATCCTTCAGTAATATTTTTTTAATATACATTTTCTCTGCCATCATGGCTTAAAAAATGCTTAAAAGAAGGGAATTAGGGGGGATGGATGAACTAAGACATAACTTTCTTTTCTTCAATTCGAACTCTGTTGGGAAGAGTTGCTTTAAAAAAGACTCTCTATCCATCTATAAAATTTATTAAAACTTTTGAACTGCACAGAATGATTGGCTCACTTAGAAACAAATTTGAGCATTTCAAAGT…	CGGAAAGCCTATTTCTCACGTTTT
721	7555	3	3	0	0	NC_001134	347518	349584	NC_001143	17999	18266	|gene |tRNA note= GO_component: cytosol [goid 0005829] [evidence NAS] |gene |CDS[fcd=-674](+,347877,349382) note= Ybr056wp;	|gene gene= SRY1 |CDS[fcd=207](-,17359,18339) gene= SRY1 note= Sry1p;	CGGAGGAGCTACTAAAGAAAGAGTGCTGCAATTAATACAATTAATATAAGTGTGGTTATTGAAAATAACTATTCATTTATACGGAGGGTTGGCCGAGTGGTCTAAGGCGGCAGACTTAAGATCTGTTGGACGGTTGTCCGCGCGAGTTCGAACCTCGCATCCTTCAGTAATATTTTTTTAATATACATTTTCTCTGCCATCATGGCTTAAAAAATGCTTAAAAGAAGGGAATTAGGGGGGATGGATGAACTAAGACATAACTTTCTTTTCTTCAATTCGAACTCTGTTGGGAAGAGTTGCTTTAAAAAAGACTCTCTATCCATCTATAAAATTTATTAAAACTTTTGAACTGCACAGAATGATTGGCTCACTTAGAAACAAATTTGAGCATTTCAAAGT…	CGGCTGTAGCAGCAACTTTAAGGGCGGGCGCATCCTCGGGCATAACAATTGTTGCAGGTACATTTAATAGTTTTGCACTAAGAGCAATAGCCTGTGCATGGTTTCCTGATGAGAAGGCAATTACTCCCTTACTTCTTTTTTCATCACTTAATTTTGAAACAGCATTCATTGCTCCACGAAACTTGAACGCTCCCACTCGTTGGAAATTCTCACCTTTAAAGTATATTTGTGCTCCAAGTCGATCATTAAGCATTCGTGAAGTGAGAA
721	8097	8	8	6	6	NC_001134	347518	349584	NC_001143	465930	467871	|gene |tRNA note= GO_component: cytosol [goid 0005829] [evidence NAS] |gene |CDS[fcd=-674](+,347877,349382) note= Ybr056wp;	|gene |CDS[fcd=1410](-,466604,468310) note= Ykr015cp;	CGGAGGAGCTACTAAAGAAAGAGTGCTGCAATTAATACAATTAATATAAGTGTGGTTATTGAAAATAACTATTCATTTATACGGAGGGTTGGCCGAGTGGTCTAAGGCGGCAGACTTAAGATCTGTTGGACGGTTGTCCGCGCGAGTTCGAACCTCGCATCCTTCAGTAATATTTTTTTAATATACATTTTCTCTGCCATCATGGCTTAAAAAATGCTTAAAAGAAGGGAATTAGGGGGGATGGATGAACTAAGACATAACTTTCTTTTCTTCAATTCGAACTCTGTTGGGAAGAGTTGCTTTAAAAAAGACTCTCTATCCATCTATAAAATTTATTAAAACTTTTGAACTGCACAGAATGATTGGCTCACTTAGAAACAAATTTGAGCATTTCAAAGT…	CGGCCAGAATAGTAGTCGCTGTCCACGAAAGCAAGACACTATGAAGTTGCCGTTTGGTCTCAATGATACACATAGTGTTAAGAACATTGAGTAATTTGGAGTCAGATTGATTTCATTCCTTTACAATCGTGATGTGCCTATTTAATTCAAGGTCATGTGGATTTCAAAATTTAACATAATGATTTTACCTACCTTTCACACATTTGAACATGGGAACGCTTAAATATTAATTACTGTGCTTCACTACAATTACAAGAGAGTACGTATTGACGTTATTACCAGTTTACTTTCCATCATACTTATCGCAGAAAACAAAATATCTAAAAAAAGTATAGTAAACGGTTGATGTCATCAAGAAGCATACCTTACTCCTTATATAGAAAGCTAAGAGACACCTAG…
721	11506	186	186	0	0	NC_001134	347518	349584	NC_001146	713282	713619	|gene |tRNA note= GO_component: cytosol [goid 0005829] [evidence NAS] |gene |CDS[fcd=-674](+,347877,349382) note= Ybr056wp;	|gene gene= MSO1 |CDS[fcd=207](-,713025,713657) gene= MSO1 note= Mso1p;	CGGAGGAGCTACTAAAGAAAGAGTGCTGCAATTAATACAATTAATATAAGTGTGGTTATTGAAAATAACTATTCATTTATACGGAGGGTTGGCCGAGTGGTCTAAGGCGGCAGACTTAAGATCTGTTGGACGGTTGTCCGCGCGAGTTCGAACCTCGCATCCTTCAGTAATATTTTTTTAATATACATTTTCTCTGCCATCATGGCTTAAAAAATGCTTAAAAGAAGGGAATTAGGGGGGATGGATGAACTAAGACATAACTTTCTTTTCTTCAATTCGAACTCTGTTGGGAAGAGTTGCTTTAAAAAAGACTCTCTATCCATCTATAAAATTTATTAAAACTTTTGAACTGCACAGAATGATTGGCTCACTTAGAAACAAATTTGAGCATTTCAAAGT…	CGGTGTGTTCCCGTTTGAAGAAGGTGTACCCATAGGATCTTCTGAAGAAGCCTTCCTTCTGTTAGAAAAGGATGGCGAGAAATGACGCGAGTTTTGCTTCTTCATATCATGCTTCACTTGAGTATCTAATATTTTACGTTCGTTCGGTAAATCTTCCTTCTCCCCCAACCATCCTGGGAACCCCTGGAAAGGATGCTGATTTTCATAGAATTTCACAAGCCCTTTATGGACCAATGTAGTATTTACAGTATCACCATCTTTTTCTGCTTTAATGGATAAATGTGCCAACGATGTAGATAACGATTTGGTTGACGACTTAAACTTGTTCCAAAATCGC
721	7136	11	11	0	0	NC_001134	347518	349584	NC_001142	365609	366368	|gene |tRNA note= GO_component: cytosol [goid 0005829] [evidence NAS] |gene |CDS[fcd=-674](+,347877,349382) note= Ybr056wp;	|gene gene= NSP1 gene= NSP1 note= Nsp1p; |neigh_up CDS[fcd=-4744](+,361244,365440) gene= MHP1 note= Mhp1p; |neigh_down CDS[fcd=7806](-,368743,373794) gene= NUP192 note= Nup192p;	CGGAGGAGCTACTAAAGAAAGAGTGCTGCAATTAATACAATTAATATAAGTGTGGTTATTGAAAATAACTATTCATTTATACGGAGGGTTGGCCGAGTGGTCTAAGGCGGCAGACTTAAGATCTGTTGGACGGTTGTCCGCGCGAGTTCGAACCTCGCATCCTTCAGTAATATTTTTTTAATATACATTTTCTCTGCCATCATGGCTTAAAAAATGCTTAAAAGAAGGGAATTAGGGGGGATGGATGAACTAAGACATAACTTTCTTTTCTTCAATTCGAACTCTGTTGGGAAGAGTTGCTTTAAAAAAGACTCTCTATCCATCTATAAAATTTATTAAAACTTTTGAACTGCACAGAATGATTGGCTCACTTAGAAACAAATTTGAGCATTTCAAAGT…	CGGACGGGTCCGATGAGTTTTTTTCTTCAAACTTTTATAGAAAATAATAAATGGTGTTAGCACCACTCAGATGTGATATTTGACGTGTCGATTGTGATACCTGAAGACGCTATTGGAGAGCCATTGCAACGCACAGTCCAACAGTAATAAGCTCTGATCGTTTTGAAAAAGTATGTTTCTTTCCATTGGACGGTTGTCTTCCGATCAAAATTTTATCTCCTATACAATTTCTTCCTATTTACTAACGAAAACCTGCGAACCTGTAAACTACATGATTTTTAATATTAGTGAACTTCAATACACCTCAACAAAACAAAACGCCCTTTTCGTTCGGGACTGCCAACAATAACTCTAACACCACCAATCAGAATTCCTCTACTGGTGCGGGCGCCTTCGGAA…
721	5399	10	10	0	0	NC_001134	347518	349584	NC_001139	943134	943770	|gene |tRNA note= GO_component: cytosol [goid 0005829] [evidence NAS] |gene |CDS[fcd=-674](+,347877,349382) note= Ybr056wp;	|gene gene= AZR1 |CDS[fcd=-643](+,942809,944650) gene= AZR1 note= Azr1p;	CGGAGGAGCTACTAAAGAAAGAGTGCTGCAATTAATACAATTAATATAAGTGTGGTTATTGAAAATAACTATTCATTTATACGGAGGGTTGGCCGAGTGGTCTAAGGCGGCAGACTTAAGATCTGTTGGACGGTTGTCCGCGCGAGTTCGAACCTCGCATCCTTCAGTAATATTTTTTTAATATACATTTTCTCTGCCATCATGGCTTAAAAAATGCTTAAAAGAAGGGAATTAGGGGGGATGGATGAACTAAGACATAACTTTCTTTTCTTCAATTCGAACTCTGTTGGGAAGAGTTGCTTTAAAAAAGACTCTCTATCCATCTATAAAATTTATTAAAACTTTTGAACTGCACAGAATGATTGGCTCACTTAGAAACAAATTTGAGCATTTCAAAGT…	CGGGTATAGCTTACCAAACGCTCTGTTGGCGTTGATATGGGGAAGAATTGCCACACCTATCGGATTCAAGGAGACCATGCTATTTGCTATTGTCATTTTTGAAATCGGGTCGCTGATCTCTGCTTTAGCAAATTCAATGAGTATGCTCATTGGTGGTAGAGTTATTGCTGGAGTCGGCGGTTGTGGTATTCAAAGTTTATCGTTCGTCATTGGTTCAACCCTGGTAGAGGAGTCGCAGAGAGGCATACTAATTGCTGTTTTGAGTTGTTCGTTTGCTATTGCATCTGTTGTTGGGCCTTTCCTTGGAGGAGTTTTCACCTCCAGCGTCACATGGAGATGGTGCTTCTATGTTAATTTACCGATCGGTGGCCTAGCATTTTTCTTATTCCTGTTCTTTTA…
721	5939	2	2	0	0	NC_001134	347518	349584	NC_001140	297440	297494	|gene |tRNA note= GO_component: cytosol [goid 0005829] [evidence NAS] |gene |CDS[fcd=-674](+,347877,349382) note= Ybr056wp;	|gene note= Yhr097cp; |neigh_up CDS[fcd=-1017](-,294672,296450) gene= HXT5 note= Hxt5p; |neigh_down CDS[fcd=4470](-,299148,301937) gene= SFB3 note= Sfb3p;	CGGAGGAGCTACTAAAGAAAGAGTGCTGCAATTAATACAATTAATATAAGTGTGGTTATTGAAAATAACTATTCATTTATACGGAGGGTTGGCCGAGTGGTCTAAGGCGGCAGACTTAAGATCTGTTGGACGGTTGTCCGCGCGAGTTCGAACCTCGCATCCTTCAGTAATATTTTTTTAATATACATTTTCTCTGCCATCATGGCTTAAAAAATGCTTAAAAGAAGGGAATTAGGGGGGATGGATGAACTAAGACATAACTTTCTTTTCTTCAATTCGAACTCTGTTGGGAAGAGTTGCTTTAAAAAAGACTCTCTATCCATCTATAAAATTTATTAAAACTTTTGAACTGCACAGAATGATTGGCTCACTTAGAAACAAATTTGAGCATTTCAAAGT…	CGGTGTTTTCCTTTTTAACAACATCTTCGTGACCGCTTCCTTGGGTGGCAGTGA
721	592	1	1	1	1	NC_001134	347518	349584	NC_001134	238538	239928	|gene |tRNA note= GO_component: cytosol [goid 0005829] [evidence NAS] |gene |CDS[fcd=-674](+,347877,349382) note= Ybr056wp;	|gene gene= NTH2 |CDS[fcd=2052](-,238943,241285) gene= NTH2 note= Nth2p;	CGGAGGAGCTACTAAAGAAAGAGTGCTGCAATTAATACAATTAATATAAGTGTGGTTATTGAAAATAACTATTCATTTATACGGAGGGTTGGCCGAGTGGTCTAAGGCGGCAGACTTAAGATCTGTTGGACGGTTGTCCGCGCGAGTTCGAACCTCGCATCCTTCAGTAATATTTTTTTAATATACATTTTCTCTGCCATCATGGCTTAAAAAATGCTTAAAAGAAGGGAATTAGGGGGGATGGATGAACTAAGACATAACTTTCTTTTCTTCAATTCGAACTCTGTTGGGAAGAGTTGCTTTAAAAAAGACTCTCTATCCATCTATAAAATTTATTAAAACTTTTGAACTGCACAGAATGATTGGCTCACTTAGAAACAAATTTGAGCATTTCAAAGT…	CGGCTTGGTACGAGAATTCTATCACACGGTAATGATAGTGTTCCCGATGTCAAGCAGTCTTATACAGTACTACCCAAGAGCTTAAGAATAAGCAAGAAGATCTGGCAAGCTACAAGGTACTCATAACGATCTTCAAAGCGTAAGTTATGATCTTATGAAAATCAGACTTTTTTGTCTCAACAAACTCCTAGTTTGAAGATGTTACTGAAATGCCCTTCAAACACTTTTACTTGAAAATCATCGATTACTATTCTAACCTTCACAAATGAGCCTTTACACAACTTGATTAATAATAATATTTGACCTTACTCTAAATCGTCTCAAATATTACTGAGGCACAATCTCATGGTTATTGATAGAAAGAAGAATATAACATATATCTTATTTACATATGTTCGT…
721	2285	940	940	0	0	NC_001134	347518	349584	NC_001136	550667	551031	|gene |tRNA note= GO_component: cytosol [goid 0005829] [evidence NAS] |gene |CDS[fcd=-674](+,347877,349382) note= Ybr056wp;	|neigh_up CDS[fcd=-275](-,548760,550574) gene= BAP3 note= Bap3p; |neigh_down CDS[fcd=1009](+,551858,552946) gene= HEM12 note= Hem12p;	CGGAGGAGCTACTAAAGAAAGAGTGCTGCAATTAATACAATTAATATAAGTGTGGTTATTGAAAATAACTATTCATTTATACGGAGGGTTGGCCGAGTGGTCTAAGGCGGCAGACTTAAGATCTGTTGGACGGTTGTCCGCGCGAGTTCGAACCTCGCATCCTTCAGTAATATTTTTTTAATATACATTTTCTCTGCCATCATGGCTTAAAAAATGCTTAAAAGAAGGGAATTAGGGGGGATGGATGAACTAAGACATAACTTTCTTTTCTTCAATTCGAACTCTGTTGGGAAGAGTTGCTTTAAAAAAGACTCTCTATCCATCTATAAAATTTATTAAAACTTTTGAACTGCACAGAATGATTGGCTCACTTAGAAACAAATTTGAGCATTTCAAAGT…	CGGTTTTTCCGATTTACCACAAGGAAACGCAAGAACAAACTACATACTGCCACTGAAATGAATTTCACTGCTAATATATCTATCCTTTAGCGAAAAAGACAAGATCAACAGAGGCGCCAGAAAAAGGCAATTATGACTAAAAAAAAAACTGTGTAAACCTGGGGATGGTAGCTGAACTACTTGCAGTCGAAAATGACCGCATATTTTACTGTCATGCTTCTGTCAAGAAAAACGAGCCTTGGATGAGAGCTTTCGTTGATCGCGGCTCGAAGTTCAGGTAGAGAAATATAGCAGAGCTCTTTTCGCGGAGCCGCATGCACGGCTACATTAAAAGGTGTCCTTCCAGCTCAGCGATATGTGTCGG
721	4418	10	10	0	0	NC_001134	347518	349584	NC_001139	54659	54688	|gene |tRNA note= GO_component: cytosol [goid 0005829] [evidence NAS] |gene |CDS[fcd=-674](+,347877,349382) note= Ybr056wp;	|gene gene= MTO1 note= synonym: IPS1 |CDS[fcd=1123](-,53787,55796) gene= MTO1 note= Mto1p;	CGGAGGAGCTACTAAAGAAAGAGTGCTGCAATTAATACAATTAATATAAGTGTGGTTATTGAAAATAACTATTCATTTATACGGAGGGTTGGCCGAGTGGTCTAAGGCGGCAGACTTAAGATCTGTTGGACGGTTGTCCGCGCGAGTTCGAACCTCGCATCCTTCAGTAATATTTTTTTAATATACATTTTCTCTGCCATCATGGCTTAAAAAATGCTTAAAAGAAGGGAATTAGGGGGGATGGATGAACTAAGACATAACTTTCTTTTCTTCAATTCGAACTCTGTTGGGAAGAGTTGCTTTAAAAAAGACTCTCTATCCATCTATAAAATTTATTAAAACTTTTGAACTGCACAGAATGATTGGCTCACTTAGAAACAAATTTGAGCATTTCAAAGT…	CGGCTGCAAGATCTCAACGTTTGCCATGC
721	7156	18	18	0	0	NC_001134	347518	349584	NC_001142	386529	387165	|gene |tRNA note= GO_component: cytosol [goid 0005829] [evidence NAS] |gene |CDS[fcd=-674](+,347877,349382) note= Ybr056wp;	|gene gene= BET4 gene= BET4 note= Bet4p; |neigh_up CDS[fcd=-3015](+,383832,386144) gene= HCA4 note= Hca4p; |neigh_down CDS[fcd=805](+,387652,388242) gene= MAD2 note= Mad2p;	CGGAGGAGCTACTAAAGAAAGAGTGCTGCAATTAATACAATTAATATAAGTGTGGTTATTGAAAATAACTATTCATTTATACGGAGGGTTGGCCGAGTGGTCTAAGGCGGCAGACTTAAGATCTGTTGGACGGTTGTCCGCGCGAGTTCGAACCTCGCATCCTTCAGTAATATTTTTTTAATATACATTTTCTCTGCCATCATGGCTTAAAAAATGCTTAAAAGAAGGGAATTAGGGGGGATGGATGAACTAAGACATAACTTTCTTTTCTTCAATTCGAACTCTGTTGGGAAGAGTTGCTTTAAAAAAGACTCTCTATCCATCTATAAAATTTATTAAAACTTTTGAACTGCACAGAATGATTGGCTCACTTAGAAACAAATTTGAGCATTTCAAAGT…	CGGAAAATTCAATTTCGTCATTATTTATTAACAGAATGTTTTCTCTCAAGTCTTTCAACATTTTAAGGTACTCTTGTTCGTCCAGAGTTTTACAAACAATGTCGTTTTTAATGAACCACTTGATATAAAACCATACGGATTGGTCTTCGGCGTCGGTAAACATAGCGTTGATGATATAAGATATTTCAGTCCGAATATACTCCTTTTGATTCCCAACCTCTCCTTTCTGAAACATTCTGCTTATGATCTGTACTCTTTGGTGCCATGCAGAATAATTTGAAATGTTATTGTTAATCTTTATTGTTGTGTATTCAAACTCCTCCTTGTCAAGACTTTTATTAGTGATACTCTCTATGTTACCAACAACTATTCTGCGGTAATGCCATCCGTGGTAATTTC…
721	13744	15	15	0	0	NC_001134	347518	349584	NC_001148	840303	840412	|gene |tRNA note= GO_component: cytosol [goid 0005829] [evidence NAS] |gene |CDS[fcd=-674](+,347877,349382) note= Ybr056wp;	|neigh_up CDS[fcd=-584](-,837905,839773) gene= TPO3 note= Tpo3p; |neigh_down CDS[fcd=905](+,841262,842665) note= Ypr157wp;	CGGAGGAGCTACTAAAGAAAGAGTGCTGCAATTAATACAATTAATATAAGTGTGGTTATTGAAAATAACTATTCATTTATACGGAGGGTTGGCCGAGTGGTCTAAGGCGGCAGACTTAAGATCTGTTGGACGGTTGTCCGCGCGAGTTCGAACCTCGCATCCTTCAGTAATATTTTTTTAATATACATTTTCTCTGCCATCATGGCTTAAAAAATGCTTAAAAGAAGGGAATTAGGGGGGATGGATGAACTAAGACATAACTTTCTTTTCTTCAATTCGAACTCTGTTGGGAAGAGTTGCTTTAAAAAAGACTCTCTATCCATCTATAAAATTTATTAAAACTTTTGAACTGCACAGAATGATTGGCTCACTTAGAAACAAATTTGAGCATTTCAAAGT…	CGGAAACTACGCCGTTCTGTTTTGTTTTTGTTTTTCCTTTTTCCCGTTTGGGTGAAATCAGTGAGCTGTTCCGATCCGTTGGGCGAAGACATTGCCGCAGTGACGAAGC
721	9889	2	2	0	0	NC_001134	347518	349584	NC_001145	252342	252565	|gene |tRNA note= GO_component: cytosol [goid 0005829] [evidence NAS] |gene |CDS[fcd=-674](+,347877,349382) note= Ybr056wp;	|gene gene= ERG6 note= synonyms: VID1, SED6, LIS1, ISE1 |CDS[fcd=537](-,251839,252990) gene= ERG6 note= Erg6p;	CGGAGGAGCTACTAAAGAAAGAGTGCTGCAATTAATACAATTAATATAAGTGTGGTTATTGAAAATAACTATTCATTTATACGGAGGGTTGGCCGAGTGGTCTAAGGCGGCAGACTTAAGATCTGTTGGACGGTTGTCCGCGCGAGTTCGAACCTCGCATCCTTCAGTAATATTTTTTTAATATACATTTTCTCTGCCATCATGGCTTAAAAAATGCTTAAAAGAAGGGAATTAGGGGGGATGGATGAACTAAGACATAACTTTCTTTTCTTCAATTCGAACTCTGTTGGGAAGAGTTGCTTTAAAAAAGACTCTCTATCCATCTATAAAATTTATTAAAACTTTTGAACTGCACAGAATGATTGGCTCACTTAGAAACAAATTTGAGCATTTCAAAGT…	CGGTTTCAAAACCTTGTAGATTTCGCTGTATACACCTTCTAATTTTGGAGCGTGACATGTGGCCTCAATTGCATAAACTTTGTCGAAAGTGTTTTCTTCGAAATCCATTTTCATGAAATCACCCTTTACAAAGTCCATTTGGTCACTCAAATTGTATTTTTTAGCGTAATATTTTGCCTTGGCAATTTGGTAATCGTTATTGTTTAGACCGATGACGTTACAA
721	679	7	7	0	0	NC_001134	347518	349584	NC_001134	315411	315438	|gene |tRNA note= GO_component: cytosol [goid 0005829] [evidence NAS] |gene |CDS[fcd=-674](+,347877,349382) note= Ybr056wp;	|neigh_up CDS[fcd=-3527](+,311897,314788) gene= CHS2 note= Chs2p; |neigh_down CDS[fcd=151](+,315575,316510) gene= ATP3 note= Atp3p;	CGGAGGAGCTACTAAAGAAAGAGTGCTGCAATTAATACAATTAATATAAGTGTGGTTATTGAAAATAACTATTCATTTATACGGAGGGTTGGCCGAGTGGTCTAAGGCGGCAGACTTAAGATCTGTTGGACGGTTGTCCGCGCGAGTTCGAACCTCGCATCCTTCAGTAATATTTTTTTAATATACATTTTCTCTGCCATCATGGCTTAAAAAATGCTTAAAAGAAGGGAATTAGGGGGGATGGATGAACTAAGACATAACTTTCTTTTCTTCAATTCGAACTCTGTTGGGAAGAGTTGCTTTAAAAAAGACTCTCTATCCATCTATAAAATTTATTAAAACTTTTGAACTGCACAGAATGATTGGCTCACTTAGAAACAAATTTGAGCATTTCAAAGT…	CGGACCGCAATAACGATTAAAGAAGGC
721	6109	101	101	0	0	NC_001134	347518	349584	NC_001140	475307	476360	|gene |tRNA note= GO_component: cytosol [goid 0005829] [evidence NAS] |gene |CDS[fcd=-674](+,347877,349382) note= Ybr056wp;	|gene gene= PFS1 note= synonym: ADY1 |CDS(-,474627,475340) gene= PFS1 note= Pfs1p; |gene |tRNA note= GO_component: cytosol [goid 0005829] [evidence NAS] |gene gene= KOG1 note= synonym: LAS24 |CDS(-,475999,480672) gene= KOG1 note= Kog1p;	CGGAGGAGCTACTAAAGAAAGAGTGCTGCAATTAATACAATTAATATAAGTGTGGTTATTGAAAATAACTATTCATTTATACGGAGGGTTGGCCGAGTGGTCTAAGGCGGCAGACTTAAGATCTGTTGGACGGTTGTCCGCGCGAGTTCGAACCTCGCATCCTTCAGTAATATTTTTTTAATATACATTTTCTCTGCCATCATGGCTTAAAAAATGCTTAAAAGAAGGGAATTAGGGGGGATGGATGAACTAAGACATAACTTTCTTTTCTTCAATTCGAACTCTGTTGGGAAGAGTTGCTTTAAAAAAGACTCTCTATCCATCTATAAAATTTATTAAAACTTTTGAACTGCACAGAATGATTGGCTCACTTAGAAACAAATTTGAGCATTTCAAAGT…	CGGTGCGGAAAGCTGTGTGTAACCTTGATTCATTTCGATAAAATTTGCGTTTTTATAAAATTCCCAAAAATACTGACTATGGTAGAAAAGATTTCAACGAGGAAGGTGGTAAAGATCAATGAAGTATCTTCAATCATTATGTAGGTTATAAGTAAATGTTTTTGTTTTCAATTATGTTCCATAGTTTGTGGTAGTTTTTCTTTGAAAACGACTGTGTCGGCCAGAATTGCTGTCGCATCACCAAAAAAAAAAAAAAATGATACAAAGACTGGGGATGAATGTTACGTAAACAGGAAAAAAAATATGTCGAAGGAGAGAGAAAAAATATTTAACAAAGTGCATGCCTCTAAACGTCGTAATTGGTCTGGCTATGACAAACAAAAAAATCGATGTTAAAAT…
721	673	304	304	0	0	NC_001134	347518	349584	NC_001134	310475	310757	|gene |tRNA note= GO_component: cytosol [goid 0005829] [evidence NAS] |gene |CDS[fcd=-674](+,347877,349382) note= Ybr056wp;	|gene gene= SCO1 note= synonym: PET161 |CDS[fcd=835](-,310564,311451) gene= SCO1 note= Sco1p;	CGGAGGAGCTACTAAAGAAAGAGTGCTGCAATTAATACAATTAATATAAGTGTGGTTATTGAAAATAACTATTCATTTATACGGAGGGTTGGCCGAGTGGTCTAAGGCGGCAGACTTAAGATCTGTTGGACGGTTGTCCGCGCGAGTTCGAACCTCGCATCCTTCAGTAATATTTTTTTAATATACATTTTCTCTGCCATCATGGCTTAAAAAATGCTTAAAAGAAGGGAATTAGGGGGGATGGATGAACTAAGACATAACTTTCTTTTCTTCAATTCGAACTCTGTTGGGAAGAGTTGCTTTAAAAAAGACTCTCTATCCATCTATAAAATTTATTAAAACTTTTGAACTGCACAGAATGATTGGCTCACTTAGAAACAAATTTGAGCATTTCAAAGT…	CGGGTGATAGCCGATATTACAAGAACGGGTTATAGCGTTATAAGTATATATGTATATACAAGGAAGAAAGTAGCATATATTTACAATCTTATTTGAATAAGAAGGAGTACCATGCCTCCTTCTGCTTGGCGCGCTGCTCTGCAGGCACATAACTCTTAACGTGTTCCACGATCTTGTCCACGCCCGTTTTTTCATCATAATTTCTACCCAAAGCATCAACAAACTGTCCTTCAGGGTCCATGAGATAAAAGAAGATGGAATGGTCTACCAAATAATCTTGGC
721	702	119	119	0	0	NC_001134	347518	349584	NC_001134	333776	334256	|gene |tRNA note= GO_component: cytosol [goid 0005829] [evidence NAS] |gene |CDS[fcd=-674](+,347877,349382) note= Ybr056wp;	|gene gene= RPS11B gene= RPS11B note= Rps11bp; |neigh_up CDS[fcd=-2185](+,331831,332358) gene= FMP23 note= Fmp23p; |neigh_down CDS[fcd=2800](-,334384,336816) gene= REB1 note= Reb1p;	CGGAGGAGCTACTAAAGAAAGAGTGCTGCAATTAATACAATTAATATAAGTGTGGTTATTGAAAATAACTATTCATTTATACGGAGGGTTGGCCGAGTGGTCTAAGGCGGCAGACTTAAGATCTGTTGGACGGTTGTCCGCGCGAGTTCGAACCTCGCATCCTTCAGTAATATTTTTTTAATATACATTTTCTCTGCCATCATGGCTTAAAAAATGCTTAAAAGAAGGGAATTAGGGGGGATGGATGAACTAAGACATAACTTTCTTTTCTTCAATTCGAACTCTGTTGGGAAGAGTTGCTTTAAAAAAGACTCTCTATCCATCTATAAAATTTATTAAAACTTTTGAACTGCACAGAATGATTGGCTCACTTAGAAACAAATTTGAGCATTTCAAAGT…	CGGTAAGGCCAACAAGCAATTTGCTAAATTTTAAAGAAATAAAATTAACAAGATGATATAATAATAAGTGGAGGATAAAACGTAGGACTTCTGGTGAATTATTTGAACCAAAGTGTCGTATATTAGGCTCTTTTTCTTTTTCTTTTACCAGACTTGGTTTTTTTCTCTCTTTAGTAATTGTTTCTATATATGGCTTATCAATTCTATATATTTTTTAACTTGAATATATGAATGACATCTTTAATAATCACATCTCGGCAAACGACTGATGAGTTCCACCTGCTTATTGTTTATTTCCTTTCGTACACGCCGCGCTTGGCCAGTCCTTCCAAGAATGTAGGCAGAAGAAATCAAACTAACTTGTAAGAGAAAGAATAAAATTCATTATACATATAGGTA…
721	11821	2	2	0	0	NC_001134	347518	349584	NC_001147	214931	215059	|gene |tRNA note= GO_component: cytosol [goid 0005829] [evidence NAS] |gene |CDS[fcd=-674](+,347877,349382) note= Ybr056wp;	|gene gene= MAM3 |CDS[fcd=1142](-,214017,216137) gene= MAM3 note= Mam3p;	CGGAGGAGCTACTAAAGAAAGAGTGCTGCAATTAATACAATTAATATAAGTGTGGTTATTGAAAATAACTATTCATTTATACGGAGGGTTGGCCGAGTGGTCTAAGGCGGCAGACTTAAGATCTGTTGGACGGTTGTCCGCGCGAGTTCGAACCTCGCATCCTTCAGTAATATTTTTTTAATATACATTTTCTCTGCCATCATGGCTTAAAAAATGCTTAAAAGAAGGGAATTAGGGGGGATGGATGAACTAAGACATAACTTTCTTTTCTTCAATTCGAACTCTGTTGGGAAGAGTTGCTTTAAAAAAGACTCTCTATCCATCTATAAAATTTATTAAAACTTTTGAACTGCACAGAATGATTGGCTCACTTAGAAACAAATTTGAGCATTTCAAAGT…	CGGTTGTTGTCTCATAATATGCTGATGCATGTCCACAAAGACATCAGACTCGTCCACGATTTCTTCACCGATCAATTCTTCAATGACATCCTCCAAAGTTAAAACACCAATAGCGCCATGCGAGGAGC
721	703	5	5	0	0	NC_001134	347518	349584	NC_001134	334257	334377	|gene |tRNA note= GO_component: cytosol [goid 0005829] [evidence NAS] |gene |CDS[fcd=-674](+,347877,349382) note= Ybr056wp;	|neigh_up CDS[fcd=-2486](+,331831,332358) gene= FMP23 note= Fmp23p; |neigh_down CDS[fcd=2499](-,334384,336816) gene= REB1 note= Reb1p;	CGGAGGAGCTACTAAAGAAAGAGTGCTGCAATTAATACAATTAATATAAGTGTGGTTATTGAAAATAACTATTCATTTATACGGAGGGTTGGCCGAGTGGTCTAAGGCGGCAGACTTAAGATCTGTTGGACGGTTGTCCGCGCGAGTTCGAACCTCGCATCCTTCAGTAATATTTTTTTAATATACATTTTCTCTGCCATCATGGCTTAAAAAATGCTTAAAAGAAGGGAATTAGGGGGGATGGATGAACTAAGACATAACTTTCTTTTCTTCAATTCGAACTCTGTTGGGAAGAGTTGCTTTAAAAAAGACTCTCTATCCATCTATAAAATTTATTAAAACTTTTGAACTGCACAGAATGATTGGCTCACTTAGAAACAAATTTGAGCATTTCAAAGT…	CGGCAATAAGTGAAGACAAGATTTGCCAAATTGTTACAGGGCTAAAAAAAAGATAAATGATGAAAAATAACGCGTACTATCAAACATTATTGAGTTTTTCGCTTTCACCAATTATATTTT
721	13258	4	4	0	0	NC_001134	347518	349584	NC_001148	397174	398053	|gene |tRNA note= GO_component: cytosol [goid 0005829] [evidence NAS] |gene |CDS[fcd=-674](+,347877,349382) note= Ybr056wp;	|gene gene= SEN54 |CDS[fcd=489](-,396699,398102) gene= SEN54 note= Sen54p;	CGGAGGAGCTACTAAAGAAAGAGTGCTGCAATTAATACAATTAATATAAGTGTGGTTATTGAAAATAACTATTCATTTATACGGAGGGTTGGCCGAGTGGTCTAAGGCGGCAGACTTAAGATCTGTTGGACGGTTGTCCGCGCGAGTTCGAACCTCGCATCCTTCAGTAATATTTTTTTAATATACATTTTCTCTGCCATCATGGCTTAAAAAATGCTTAAAAGAAGGGAATTAGGGGGGATGGATGAACTAAGACATAACTTTCTTTTCTTCAATTCGAACTCTGTTGGGAAGAGTTGCTTTAAAAAAGACTCTCTATCCATCTATAAAATTTATTAAAACTTTTGAACTGCACAGAATGATTGGCTCACTTAGAAACAAATTTGAGCATTTCAAAGT…	CGGGGTCTCTTTTCTTGAAATTAGAATGGGGTTTCCATACTTTAAATGTCAAGGGAATATCCTTTACCTTTTGAAATTCCCTATCAGATTGTGCATCCAATAGCTCTTTTTTATTCTTTGGTACAGCCACGGAACGAACAAGCCTATTTAAACCCTGGTATAACTGTGGTGAAGTCGTATATTTACGAAAAAAAAAATTCCACTTAGAATAGAAGAAACCACTAAACAGCGATAACTCTTGTATTTTAAACAATGAAAGTAATCTCCAAGTGATTGCTTGTAAATTACTTCGTTGCTTTTTCAATGGGAAAAAGGAAGTCTTGACTGCTGCTTCTTGATTGCTGGGTTTTAGAATAAAACCCAACCTTTTTAAATGAGCAAACACAAAATATTGGTCCA…
721	701	633	945	0	0	NC_001134	347518	349584	NC_001134	333554	333775	|gene |tRNA note= GO_component: cytosol [goid 0005829] [evidence NAS] |gene |CDS[fcd=-674](+,347877,349382) note= Ybr056wp;	|gene gene= RPS11B gene= RPS11B note= Rps11bp; |neigh_up CDS[fcd=-1833](+,331831,332358) gene= FMP23 note= Fmp23p; |neigh_down CDS[fcd=3152](-,334384,336816) gene= REB1 note= Reb1p;	CGGAGGAGCTACTAAAGAAAGAGTGCTGCAATTAATACAATTAATATAAGTGTGGTTATTGAAAATAACTATTCATTTATACGGAGGGTTGGCCGAGTGGTCTAAGGCGGCAGACTTAAGATCTGTTGGACGGTTGTCCGCGCGAGTTCGAACCTCGCATCCTTCAGTAATATTTTTTTAATATACATTTTCTCTGCCATCATGGCTTAAAAAATGCTTAAAAGAAGGGAATTAGGGGGGATGGATGAACTAAGACATAACTTTCTTTTCTTCAATTCGAACTCTGTTGGGAAGAGTTGCTTTAAAAAAGACTCTCTATCCATCTATAAAATTTATTAAAACTTTTGAACTGCACAGAATGATTGGCTCACTTAGAAACAAATTTGAGCATTTCAAAGT…	CGGTACCGTCGTCTCCACCAAGATGCACCGTACCATTGTCATCAGAAGAGCTTACTTGCATTACATTCCAAAGTACAACAGATACGAAAAGAGACACAAGAACGTCCCAGTCCACGTCTCCCCAGCTTTCCGTGTCCAAGTTGGTGACATTGTTACCGTTGGTCAATGTAGACCAATCTCCAAGACTGTTAGATTCAACGTCGTCAAGGTCTCTGCTGCTG
721	694	4	4	1	1	NC_001134	347518	349584	NC_001134	324425	324485	|gene |tRNA note= GO_component: cytosol [goid 0005829] [evidence NAS] |gene |CDS[fcd=-674](+,347877,349382) note= Ybr056wp;	|gene gene= TCM62 |CDS[fcd=1603](-,324337,326058) gene= TCM62 note= Tcm62p;	CGGAGGAGCTACTAAAGAAAGAGTGCTGCAATTAATACAATTAATATAAGTGTGGTTATTGAAAATAACTATTCATTTATACGGAGGGTTGGCCGAGTGGTCTAAGGCGGCAGACTTAAGATCTGTTGGACGGTTGTCCGCGCGAGTTCGAACCTCGCATCCTTCAGTAATATTTTTTTAATATACATTTTCTCTGCCATCATGGCTTAAAAAATGCTTAAAAGAAGGGAATTAGGGGGGATGGATGAACTAAGACATAACTTTCTTTTCTTCAATTCGAACTCTGTTGGGAAGAGTTGCTTTAAAAAAGACTCTCTATCCATCTATAAAATTTATTAAAACTTTTGAACTGCACAGAATGATTGGCTCACTTAGAAACAAATTTGAGCATTTCAAAGT…	CGGCTAAACAAGAATCCATTTTGCTCCATGGCTCCAAGTTTCCATCCTTTACTGTGTTCA
721	8404	2	2	0	0	NC_001134	347518	349584	NC_001144	65178	65368	|gene |tRNA note= GO_component: cytosol [goid 0005829] [evidence NAS] |gene |CDS[fcd=-674](+,347877,349382) note= Ybr056wp;	|gene gene= UBI4 note= synonyms: UB14, SCD2 |CDS[fcd=-67](-,64061,65206) gene= UBI4 note= Ubi4p;	CGGAGGAGCTACTAAAGAAAGAGTGCTGCAATTAATACAATTAATATAAGTGTGGTTATTGAAAATAACTATTCATTTATACGGAGGGTTGGCCGAGTGGTCTAAGGCGGCAGACTTAAGATCTGTTGGACGGTTGTCCGCGCGAGTTCGAACCTCGCATCCTTCAGTAATATTTTTTTAATATACATTTTCTCTGCCATCATGGCTTAAAAAATGCTTAAAAGAAGGGAATTAGGGGGGATGGATGAACTAAGACATAACTTTCTTTTCTTCAATTCGAACTCTGTTGGGAAGAGTTGCTTTAAAAAAGACTCTCTATCCATCTATAAAATTTATTAAAACTTTTGAACTGCACAGAATGATTGGCTCACTTAGAAACAAATTTGAGCATTTCAAAGT…	CGGTCAAAGTCTTGACGAAAATCTGCATAATCTATTAGTTAAAGTAAAGTGGGAGGGAGAGTTCGAGAGTTCTTGTCGTATTGTAGTAGATAGAAGATATACTTATCCTTATCCGTACAGTTCTTGCTCTTTCTGAAGTAGCACTTTCGGAAGAAGAAAGATAAGCAGGCGAATTCAAAGGTGGCAAAAC
721	8946	173	173	0	0	NC_001134	347518	349584	NC_001144	510623	510907	|gene |tRNA note= GO_component: cytosol [goid 0005829] [evidence NAS] |gene |CDS[fcd=-674](+,347877,349382) note= Ybr056wp;	|neigh_up CDS[fcd=-531](-,507799,510234) gene= RFX1 note= Rfx1p; |neigh_down CDS[fcd=291](+,511056,512942) note= Ylr177wp;	CGGAGGAGCTACTAAAGAAAGAGTGCTGCAATTAATACAATTAATATAAGTGTGGTTATTGAAAATAACTATTCATTTATACGGAGGGTTGGCCGAGTGGTCTAAGGCGGCAGACTTAAGATCTGTTGGACGGTTGTCCGCGCGAGTTCGAACCTCGCATCCTTCAGTAATATTTTTTTAATATACATTTTCTCTGCCATCATGGCTTAAAAAATGCTTAAAAGAAGGGAATTAGGGGGGATGGATGAACTAAGACATAACTTTCTTTTCTTCAATTCGAACTCTGTTGGGAAGAGTTGCTTTAAAAAAGACTCTCTATCCATCTATAAAATTTATTAAAACTTTTGAACTGCACAGAATGATTGGCTCACTTAGAAACAAATTTGAGCATTTCAAAGT…	CGGCTGATTTAGGTGCACATCAGCTACCCAGCATACAAAGGGGCTTCCGTACGGTTGATGGTTATTTTTCTTGGTGTGTTGGTGCTGCTGTATCGCTGGTGCTGTCTGCGTTATTACGACTATCGTAGGACAAGGCCTCGAGAGGTGTAGGGTAAATCCCACTTGCACAAAGTATGTACACACTTGATTATCCAAATACCAAGAGAGTGTGGTTCAATTTACGGGCAGCTCGAGCTGCCCGTAAATTGAACCTTCCCCTTCCCCACGCTCAAGGGGTTCCTGCG
721	9369	7	7	0	0	NC_001134	347518	349584	NC_001144	874376	875212	|gene |tRNA note= GO_component: cytosol [goid 0005829] [evidence NAS] |gene |CDS[fcd=-674](+,347877,349382) note= Ybr056wp;	|gene gene= FBP1 note= synonym: ACN8 |CDS[fcd=-3](-,873745,874791) gene= FBP1 note= Fbp1p;	CGGAGGAGCTACTAAAGAAAGAGTGCTGCAATTAATACAATTAATATAAGTGTGGTTATTGAAAATAACTATTCATTTATACGGAGGGTTGGCCGAGTGGTCTAAGGCGGCAGACTTAAGATCTGTTGGACGGTTGTCCGCGCGAGTTCGAACCTCGCATCCTTCAGTAATATTTTTTTAATATACATTTTCTCTGCCATCATGGCTTAAAAAATGCTTAAAAGAAGGGAATTAGGGGGGATGGATGAACTAAGACATAACTTTCTTTTCTTCAATTCGAACTCTGTTGGGAAGAGTTGCTTTAAAAAAGACTCTCTATCCATCTATAAAATTTATTAAAACTTTTGAACTGCACAGAATGATTGGCTCACTTAGAAACAAATTTGAGCATTTCAAAGT…	CGGCGTCCAAATTTGAGGAGCCATCAATAGGATCACAACACACTGCGTATGAGCCCGTGTTTGTGGGAAAAACGATCAAGTCTTCCTGTTCTTCAGATACAAGGACCTTGATGATCCCACTAGCCCTCATGGCATTGATAAATATTTCATCACCTAGAACGTCCAACTTCTTTTGCTGGTCACCAGTGAAGTTGGAAGCGCCTGCTAACCCAACCAAGTTAACCAATTCAGCACGTCTGATGGTGTGAGATACAAATTTGAACGCGAATTGCAAGGCATTCAGTACTAATGTGAAATCACCAGTAGCGTTCTTAAATTGCTTCTGGTGCTCGATTATGAATCTAGGAAGAGTGATGATATCGGTATCAAACCCTTCGGTAGAGTCTCTTCTTGGTCCAT…
721	13742	9	9	0	0	NC_001134	347518	349584	NC_001148	839627	839923	|gene |tRNA note= GO_component: cytosol [goid 0005829] [evidence NAS] |gene |CDS[fcd=-674](+,347877,349382) note= Ybr056wp;	|gene gene= TPO3 |CDS[fcd=-2](-,837905,839773) gene= TPO3 note= Tpo3p;	CGGAGGAGCTACTAAAGAAAGAGTGCTGCAATTAATACAATTAATATAAGTGTGGTTATTGAAAATAACTATTCATTTATACGGAGGGTTGGCCGAGTGGTCTAAGGCGGCAGACTTAAGATCTGTTGGACGGTTGTCCGCGCGAGTTCGAACCTCGCATCCTTCAGTAATATTTTTTTAATATACATTTTCTCTGCCATCATGGCTTAAAAAATGCTTAAAAGAAGGGAATTAGGGGGGATGGATGAACTAAGACATAACTTTCTTTTCTTCAATTCGAACTCTGTTGGGAAGAGTTGCTTTAAAAAAGACTCTCTATCCATCTATAAAATTTATTAAAACTTTTGAACTGCACAGAATGATTGGCTCACTTAGAAACAAATTTGAGCATTTCAAAGT…	CGGGTCAACTTCAGTTGATTAGGAGCCATGTTGGATTTAGATCCACTCTCTGAAGGGATATATTGTTGCGGCTGCTGACTTTCTACATCAGACAACGAAGATGTTTCGTCTGAATTAAACGAATTTATGGATTCCTGTCTGTTCATTTCTGTTTATCTTTGGCTAGAGGAGTACTAATGCAAAATTAAAATAATGAAGTAAGAAGGGAGAAAGTAATTAGTTATATTAGAAAACTAGACCACGAAATTTGTAGTATAATTATGGGTATGACAATTAAAGAATTAGGGTGAACGCTA
721	10314	1	1	0	0	NC_001134	347518	349584	NC_001145	629801	632807	|gene |tRNA note= GO_component: cytosol [goid 0005829] [evidence NAS] |gene |CDS[fcd=-674](+,347877,349382) note= Ybr056wp;	|gene |CDS(+,629024,631969) note= Ymr185wp; |gene gene= HSC82 note= synonym: HSP90 |CDS(+,632354,634471) gene= HSC82 note= Hsc82p;	CGGAGGAGCTACTAAAGAAAGAGTGCTGCAATTAATACAATTAATATAAGTGTGGTTATTGAAAATAACTATTCATTTATACGGAGGGTTGGCCGAGTGGTCTAAGGCGGCAGACTTAAGATCTGTTGGACGGTTGTCCGCGCGAGTTCGAACCTCGCATCCTTCAGTAATATTTTTTTAATATACATTTTCTCTGCCATCATGGCTTAAAAAATGCTTAAAAGAAGGGAATTAGGGGGGATGGATGAACTAAGACATAACTTTCTTTTCTTCAATTCGAACTCTGTTGGGAAGAGTTGCTTTAAAAAAGACTCTCTATCCATCTATAAAATTTATTAAAACTTTTGAACTGCACAGAATGATTGGCTCACTTAGAAACAAATTTGAGCATTTCAAAGT…	CGGAAAATGGTCTGATCAGCTTGATTGATTTCGTTTTGGGTGTGAGAGATGCTGAAGATATAGATATTGAAAAGTTTAACCGTATCTACCAAATTTTGATGAGTAAGCCAAAAACAATGACAAATTTGCAATACTTGACGGAACTATTCAAGCAAATTTATGATGGTCTCACCTTTGTGAACAGGCCTATCCTGGTCACTTGTTTGAACGGACTAATCCTTAAATTTTACCTGAGGAATAAGAGGATTGTTAACGATTTTTTGTTTAAGAAGGTCCGCTCCATTATCTTTAATTCCCCGTTAACTGATCATACAGCAAAGGAACTGAACGATGTTATAAACGTTCTTATATCTTTATCCAAAAATTCTTCATCGGATTTGCTGAATGATTTAGTTACTA…
721	13743	3	3	0	0	NC_001134	347518	349584	NC_001148	839924	840302	|gene |tRNA note= GO_component: cytosol [goid 0005829] [evidence NAS] |gene |CDS[fcd=-674](+,347877,349382) note= Ybr056wp;	|neigh_up CDS[fcd=-340](-,837905,839773) gene= TPO3 note= Tpo3p; |neigh_down CDS[fcd=1149](+,841262,842665) note= Ypr157wp;	CGGAGGAGCTACTAAAGAAAGAGTGCTGCAATTAATACAATTAATATAAGTGTGGTTATTGAAAATAACTATTCATTTATACGGAGGGTTGGCCGAGTGGTCTAAGGCGGCAGACTTAAGATCTGTTGGACGGTTGTCCGCGCGAGTTCGAACCTCGCATCCTTCAGTAATATTTTTTTAATATACATTTTCTCTGCCATCATGGCTTAAAAAATGCTTAAAAGAAGGGAATTAGGGGGGATGGATGAACTAAGACATAACTTTCTTTTCTTCAATTCGAACTCTGTTGGGAAGAGTTGCTTTAAAAAAGACTCTCTATCCATCTATAAAATTTATTAAAACTTTTGAACTGCACAGAATGATTGGCTCACTTAGAAACAAATTTGAGCATTTCAAAGT…	CGGTGAGGACAAAAAAGGCTGAACGAAGAAGAAAAATAAAAAGAAGATTAGATCAACGCACCTAGACGAAAAAGAGCAAATACTGCTTATTGTATTCACTTTGGAGAACAGGTTGTAACAGGACAGCTGACAATTGCTAAGTTAAGTAGATTACAAAGACAAATGTTCTTAGGCGAAAAGAATATATAAACTAAAAGAAAAAGTGGAAAAAGGGTACGTGTAAAAAGAGACTAGGATGGTTGAGCAGCGAATGATTGCAAGATATATAAAAGAAACGAGCCAGTTTTACAGCGTTTAACGCAGATCCAGAATATGAACAAAATGCATTAGGAAATAAATGAAAAAAATGGCTCTATGGATCAGGGATCATCATGGCTG
721	12768	1	1	0	0	NC_001134	347518	349584	NC_001147	1034381	1034405	|gene |tRNA note= GO_component: cytosol [goid 0005829] [evidence NAS] |gene |CDS[fcd=-674](+,347877,349382) note= Ybr056wp;	|neigh_up CDS[fcd=-213](-,1031487,1034180) gene= GPB1 note= Gpb1p; |neigh_down CDS[fcd=2076](-,1034805,1036469) gene= NDD1 note= Ndd1p;	CGGAGGAGCTACTAAAGAAAGAGTGCTGCAATTAATACAATTAATATAAGTGTGGTTATTGAAAATAACTATTCATTTATACGGAGGGTTGGCCGAGTGGTCTAAGGCGGCAGACTTAAGATCTGTTGGACGGTTGTCCGCGCGAGTTCGAACCTCGCATCCTTCAGTAATATTTTTTTAATATACATTTTCTCTGCCATCATGGCTTAAAAAATGCTTAAAAGAAGGGAATTAGGGGGGATGGATGAACTAAGACATAACTTTCTTTTCTTCAATTCGAACTCTGTTGGGAAGAGTTGCTTTAAAAAAGACTCTCTATCCATCTATAAAATTTATTAAAACTTTTGAACTGCACAGAATGATTGGCTCACTTAGAAACAAATTTGAGCATTTCAAAGT…	CGGGGAATTGCTTTTATGGGATAC
721	8021	9	9	0	0	NC_001134	347518	349584	NC_001143	400016	401644	|gene |tRNA note= GO_component: cytosol [goid 0005829] [evidence NAS] |gene |CDS[fcd=-674](+,347877,349382) note= Ybr056wp;	|gene gene= SPT23 |CDS[fcd=893](-,398475,401723) gene= SPT23 note= Spt23p;	CGGAGGAGCTACTAAAGAAAGAGTGCTGCAATTAATACAATTAATATAAGTGTGGTTATTGAAAATAACTATTCATTTATACGGAGGGTTGGCCGAGTGGTCTAAGGCGGCAGACTTAAGATCTGTTGGACGGTTGTCCGCGCGAGTTCGAACCTCGCATCCTTCAGTAATATTTTTTTAATATACATTTTCTCTGCCATCATGGCTTAAAAAATGCTTAAAAGAAGGGAATTAGGGGGGATGGATGAACTAAGACATAACTTTCTTTTCTTCAATTCGAACTCTGTTGGGAAGAGTTGCTTTAAAAAAGACTCTCTATCCATCTATAAAATTTATTAAAACTTTTGAACTGCACAGAATGATTGGCTCACTTAGAAACAAATTTGAGCATTTCAAAGT…	CGGTCCAGGTTTAGATGAAGGCGGTAAATAAGTCACCATCGTAGATTCATTCCAGCATTGGCTGGACAATGCTATATTTTCGCCAAACTTGATGATTAAGCCCTGCTTAAACTTTGAGCCAAGTAGAGTCACTTCTATACCTCCGTTGATGGAACCTTGTGCGGGGATGACACGCTGAATAGAAGGCTTGTTATTTAGCGCCACGGGGACACTATTATGGTTCGATATATCTTTGGAAGAATCGATGAATTTCTGGGGAAGACGGGAAAACGTATTAGGCGTAGACATAAAAGGCTCGTTTACCGAACGCTGCCTCTTGCCAGTGTGTCTCGCAGAGGCCGCACTGAAATCACTAGTTAATGTAGTAAGAGCGGGATTAGATGAACTATTAAAACCTGT…
721	1729	1	1	0	0	NC_001134	347518	349584	NC_001136	77588	77824	|gene |tRNA note= GO_component: cytosol [goid 0005829] [evidence NAS] |gene |CDS[fcd=-674](+,347877,349382) note= Ybr056wp;	|gene gene= NOP6 |CDS[fcd=261](-,77290,77967) gene= NOP6 note= Nop6p;	CGGAGGAGCTACTAAAGAAAGAGTGCTGCAATTAATACAATTAATATAAGTGTGGTTATTGAAAATAACTATTCATTTATACGGAGGGTTGGCCGAGTGGTCTAAGGCGGCAGACTTAAGATCTGTTGGACGGTTGTCCGCGCGAGTTCGAACCTCGCATCCTTCAGTAATATTTTTTTAATATACATTTTCTCTGCCATCATGGCTTAAAAAATGCTTAAAAGAAGGGAATTAGGGGGGATGGATGAACTAAGACATAACTTTCTTTTCTTCAATTCGAACTCTGTTGGGAAGAGTTGCTTTAAAAAAGACTCTCTATCCATCTATAAAATTTATTAAAACTTTTGAACTGCACAGAATGATTGGCTCACTTAGAAACAAATTTGAGCATTTCAAAGT…	CGGTGCGATCTTTGTCAGCATCGAATTCCAAAAATGCAATACCTTTGTCAGCTCTGAGGCGGATCTGGTCGGGTGAACTATTTTTAAAATGGTTTTGCAATTCAACAGCAGTGATGTCTCTAGGTAAGCTACCGACAAAGACAATAAATCTGTTGCCCTTTTTACCATTTTTGCCCTTACCACCACGGCCTCTACGTGTTTTTCTTTTTTTCTTCACGGGTTCTTCACCATCATTT
721	6400	3	3	0	0	NC_001134	347518	349584	NC_001141	142459	142544	|gene |tRNA note= GO_component: cytosol [goid 0005829] [evidence NAS] |gene |CDS[fcd=-674](+,347877,349382) note= Ybr056wp;	|neigh_up CDS[fcd=-935](-,140610,141566) gene= PRM5 note= Prm5p; |neigh_down CDS[fcd=424](+,142925,144082) gene= HIS5 note= His5p;	CGGAGGAGCTACTAAAGAAAGAGTGCTGCAATTAATACAATTAATATAAGTGTGGTTATTGAAAATAACTATTCATTTATACGGAGGGTTGGCCGAGTGGTCTAAGGCGGCAGACTTAAGATCTGTTGGACGGTTGTCCGCGCGAGTTCGAACCTCGCATCCTTCAGTAATATTTTTTTAATATACATTTTCTCTGCCATCATGGCTTAAAAAATGCTTAAAAGAAGGGAATTAGGGGGGATGGATGAACTAAGACATAACTTTCTTTTCTTCAATTCGAACTCTGTTGGGAAGAGTTGCTTTAAAAAAGACTCTCTATCCATCTATAAAATTTATTAAAACTTTTGAACTGCACAGAATGATTGGCTCACTTAGAAACAAATTTGAGCATTTCAAAGT…	CGGTTATATTGAGACCTTTCCTGGACAGTAACTAATACAGAAGCCATTGGTAATGCAATAATTTATTTGATCATGTGACTACGAT
721	11326	91	91	2	2	NC_001134	347518	349584	NC_001146	555018	555286	|gene |tRNA note= GO_component: cytosol [goid 0005829] [evidence NAS] |gene |CDS[fcd=-674](+,347877,349382) note= Ybr056wp;	|gene gene= BDP1 note= synonym: TFC5 |CDS[fcd=-103](+,555049,556833) gene= BDP1 note= Bdp1p;	CGGAGGAGCTACTAAAGAAAGAGTGCTGCAATTAATACAATTAATATAAGTGTGGTTATTGAAAATAACTATTCATTTATACGGAGGGTTGGCCGAGTGGTCTAAGGCGGCAGACTTAAGATCTGTTGGACGGTTGTCCGCGCGAGTTCGAACCTCGCATCCTTCAGTAATATTTTTTTAATATACATTTTCTCTGCCATCATGGCTTAAAAAATGCTTAAAAGAAGGGAATTAGGGGGGATGGATGAACTAAGACATAACTTTCTTTTCTTCAATTCGAACTCTGTTGGGAAGAGTTGCTTTAAAAAAGACTCTCTATCCATCTATAAAATTTATTAAAACTTTTGAACTGCACAGAATGATTGGCTCACTTAGAAACAAATTTGAGCATTTCAAAGT…	CGGCAAGGAGCCACTGATTACCAGGTATTTATGAGTAGTATTGTTAATAAAAGTGGTACACGCTTTGCCCCTAAAGTAAGGCAGCGTAGAGCCGCCACTGGAGGAACACCAACTCCAAAGCCAAGAACCCCTCAACTTTTCATTCCCGAAAGTAAAGAAATAGAAGAAGATAATAGTGATAACGATAAAGGTGTTGATGAAAATGAAACGGCTATTGTTGAGAAACCTTCGCTAGTTGGAGAACGCTCTTTAGAAGGCTTTACCTTAA
721	641	886	886	0	0	NC_001134	347518	349584	NC_001134	285213	285580	|gene |tRNA note= GO_component: cytosol [goid 0005829] [evidence NAS] |gene |CDS[fcd=-674](+,347877,349382) note= Ybr056wp;	|gene gene= CHS3 note= synonyms: KTI2, DIT101, CSD2, CAL1 |CDS[fcd=2529](-,284428,287925) gene= CHS3 note= Chs3p;	CGGAGGAGCTACTAAAGAAAGAGTGCTGCAATTAATACAATTAATATAAGTGTGGTTATTGAAAATAACTATTCATTTATACGGAGGGTTGGCCGAGTGGTCTAAGGCGGCAGACTTAAGATCTGTTGGACGGTTGTCCGCGCGAGTTCGAACCTCGCATCCTTCAGTAATATTTTTTTAATATACATTTTCTCTGCCATCATGGCTTAAAAAATGCTTAAAAGAAGGGAATTAGGGGGGATGGATGAACTAAGACATAACTTTCTTTTCTTCAATTCGAACTCTGTTGGGAAGAGTTGCTTTAAAAAAGACTCTCTATCCATCTATAAAATTTATTAAAACTTTTGAACTGCACAGAATGATTGGCTCACTTAGAAACAAATTTGAGCATTTCAAAGT…	CGGCAAACAAGTTACCGAACCGAAGACAGATTCAAAAGCTTTAGCCTGATGATGCGAAATATAGTACTCAAACACTTGAATTGCAGTTACCCAAGATTGTGCCTTATTAGCGATCTTGGTCTCACCACAAAGACCCATAATCAAAGGATCTTTAACCATTTCAGCGACCATATGAGTTAAAGCATCGGGAAAGACTTTAGTATCAGCATCAACCATAAGTACCGTTTCGTAGAAGTCTGCCATTAGCCCCGTAATCTGCCAAATATTTTTTAAAAGCTGAAATTCCAATTGAGTCATTCTTTCATCAAATGTTATTTTTTCTAAAAAGGACATCAGAATAATTTGAGAATCACGCTTACCTCTGTTA
721	165	1	1	0	0	NC_001134	347518	349584	NC_001133	124697	127118	|gene |tRNA note= GO_component: cytosol [goid 0005829] [evidence NAS] |gene |CDS[fcd=-674](+,347877,349382) note= Ybr056wp;	|gene gene= TPD3 note= synonym: FUN32 |CDS(+,124880,126787) gene= TPD3 note= Tpd3p; |gene gene= NTG1 note= synonyms: SCR1, FUN33 |CDS(-,126904,128103) gene= NTG1 note= Ntg1p;	CGGAGGAGCTACTAAAGAAAGAGTGCTGCAATTAATACAATTAATATAAGTGTGGTTATTGAAAATAACTATTCATTTATACGGAGGGTTGGCCGAGTGGTCTAAGGCGGCAGACTTAAGATCTGTTGGACGGTTGTCCGCGCGAGTTCGAACCTCGCATCCTTCAGTAATATTTTTTTAATATACATTTTCTCTGCCATCATGGCTTAAAAAATGCTTAAAAGAAGGGAATTAGGGGGGATGGATGAACTAAGACATAACTTTCTTTTCTTCAATTCGAACTCTGTTGGGAAGAGTTGCTTTAAAAAAGACTCTCTATCCATCTATAAAATTTATTAAAACTTTTGAACTGCACAGAATGATTGGCTCACTTAGAAACAAATTTGAGCATTTCAAAGT…	CGGAATGCCCTTTTTGCAGGGAAAGCGAAAAAGGTGAAAGAGTTAACAGGAGAAAGTGTTAGGGAACTAAGTTACGAAGGAAGGCAGATAGCAACAATACTAACGTGGAACTTATTTCGACGACTATAACAACTGGTATCTGATTATCGAAGAATAATTGAGTGGTCAGAAAGGAGCGAAATATGTCTGGAGCAAGATCAACAACGGCAGGTGCCGTGCCCTCGGCAGCAACAACATCAACAACATCAACAACGTCAAACTCTAAGGACTCAGACTCTAACGAGTCATTATATCCCTTGGCTCTGCTTATGGATGAGTTAAAACATGATGATATTGCTAATAGGGTAGAAGCCATGAAAAAACTAGATACCATCGCGTTGGCACTCGGTCCCGAAAGAA…
721	10819	22	22	0	0	NC_001134	347518	349584	NC_001146	148556	149112	|gene |tRNA note= GO_component: cytosol [goid 0005829] [evidence NAS] |gene |CDS[fcd=-674](+,347877,349382) note= Ybr056wp;	|gene gene= POL2 note= synonym: DUN2 |CDS[fcd=-621](+,148213,154881) gene= POL2 note= Pol2p;	CGGAGGAGCTACTAAAGAAAGAGTGCTGCAATTAATACAATTAATATAAGTGTGGTTATTGAAAATAACTATTCATTTATACGGAGGGTTGGCCGAGTGGTCTAAGGCGGCAGACTTAAGATCTGTTGGACGGTTGTCCGCGCGAGTTCGAACCTCGCATCCTTCAGTAATATTTTTTTAATATACATTTTCTCTGCCATCATGGCTTAAAAAATGCTTAAAAGAAGGGAATTAGGGGGGATGGATGAACTAAGACATAACTTTCTTTTCTTCAATTCGAACTCTGTTGGGAAGAGTTGCTTTAAAAAAGACTCTCTATCCATCTATAAAATTTATTAAAACTTTTGAACTGCACAGAATGATTGGCTCACTTAGAAACAAATTTGAGCATTTCAAAGT…	CGGAGTTGACTTCTACTTTTTAGATGAAGAGGGTGGGAGCTTCAAGTCGACAGTTGTCTATGACCCATACTTCTTTATTGCGTGTAACGATGAATCAAGAGTAAATGATGTGGAGGAACTAGTGAAAAAATATCTGGAATCTTGTCTCAAAAGCTTACAAATCATTAGAAAGGAAGATCTTACCATGGACAATCACCTTTTAGGGCTGCAGAAGACACTTATTAAGTTATCATTTGTAAATTCCAATCAGTTATTCGAGGCCAGGAAACTCCTGAGGCCAATCTTGCAGGATAATGCCAATAATAATGTGCAAAGAAATATATATAACGTTGCTGCAAATGGCTCGGAAAAAGTTGACGCCAAACATCTGATCGAAGATATCAGGGAATATGATGTGCC…
721	11309	16	16	0	0	NC_001134	347518	349584	NC_001146	542449	542472	|gene |tRNA note= GO_component: cytosol [goid 0005829] [evidence NAS] |gene |CDS[fcd=-674](+,347877,349382) note= Ybr056wp;	|gene |CDS[fcd=-155](+,542305,542823) note= Ynl046wp;	CGGAGGAGCTACTAAAGAAAGAGTGCTGCAATTAATACAATTAATATAAGTGTGGTTATTGAAAATAACTATTCATTTATACGGAGGGTTGGCCGAGTGGTCTAAGGCGGCAGACTTAAGATCTGTTGGACGGTTGTCCGCGCGAGTTCGAACCTCGCATCCTTCAGTAATATTTTTTTAATATACATTTTCTCTGCCATCATGGCTTAAAAAATGCTTAAAAGAAGGGAATTAGGGGGGATGGATGAACTAAGACATAACTTTCTTTTCTTCAATTCGAACTCTGTTGGGAAGAGTTGCTTTAAAAAAGACTCTCTATCCATCTATAAAATTTATTAAAACTTTTGAACTGCACAGAATGATTGGCTCACTTAGAAACAAATTTGAGCATTTCAAAGT…	CGGTTGAATCCCAGTACAGAATT
721	9403	41	41	0	0	NC_001134	347518	349584	NC_001144	901208	901599	|gene |tRNA note= GO_component: cytosol [goid 0005829] [evidence NAS] |gene |CDS[fcd=-674](+,347877,349382) note= Ybr056wp;	|gene gene= STE23 |CDS[fcd=1257](-,899577,902660) gene= STE23 note= Ste23p;	CGGAGGAGCTACTAAAGAAAGAGTGCTGCAATTAATACAATTAATATAAGTGTGGTTATTGAAAATAACTATTCATTTATACGGAGGGTTGGCCGAGTGGTCTAAGGCGGCAGACTTAAGATCTGTTGGACGGTTGTCCGCGCGAGTTCGAACCTCGCATCCTTCAGTAATATTTTTTTAATATACATTTTCTCTGCCATCATGGCTTAAAAAATGCTTAAAAGAAGGGAATTAGGGGGGATGGATGAACTAAGACATAACTTTCTTTTCTTCAATTCGAACTCTGTTGGGAAGAGTTGCTTTAAAAAAGACTCTCTATCCATCTATAAAATTTATTAAAACTTTTGAACTGCACAGAATGATTGGCTCACTTAGAAACAAATTTGAGCATTTCAAAGT…	CGGGACCAGAGCGTCCGTATATTGGGTAAGCAAATCAGGTTCATATTTCGTTAACAAACCCATGGCTAAAATTCTGCTAACAGGAATGTAATCCTTTTCCAAGCATTTTGCCAATGATGAAACTGTGGAAGATGGGCTACCAGCTTGCTTAAACTTGAAGGTAGCATTAGAGATATCTTGCAGTTCATTGAATATCCATTTTTGAGGTAGTGAGTTTTTCAACATTTCAATATACTGGAAGATCAAGACAATAACATCGCGATAGTGTGTCAACCCGTTGTCTGTTAAATCTATATCGACAGCAAAAAAAGCATTTCCTTTGGACACAGTATGCCCACCAGCAGATAGCTCATTGGCCCAGCCCAATTTTTTCAAATGTGCTAGTAATGAA
721	9405	1	1	0	0	NC_001134	347518	349584	NC_001144	902459	902800	|gene |tRNA note= GO_component: cytosol [goid 0005829] [evidence NAS] |gene |CDS[fcd=-674](+,347877,349382) note= Ybr056wp;	|gene gene= STE23 |CDS[fcd=31](-,899577,902660) gene= STE23 note= Ste23p;	CGGAGGAGCTACTAAAGAAAGAGTGCTGCAATTAATACAATTAATATAAGTGTGGTTATTGAAAATAACTATTCATTTATACGGAGGGTTGGCCGAGTGGTCTAAGGCGGCAGACTTAAGATCTGTTGGACGGTTGTCCGCGCGAGTTCGAACCTCGCATCCTTCAGTAATATTTTTTTAATATACATTTTCTCTGCCATCATGGCTTAAAAAATGCTTAAAAGAAGGGAATTAGGGGGGATGGATGAACTAAGACATAACTTTCTTTTCTTCAATTCGAACTCTGTTGGGAAGAGTTGCTTTAAAAAAGACTCTCTATCCATCTATAAAATTTATTAAAACTTTTGAACTGCACAGAATGATTGGCTCACTTAGAAACAAATTTGAGCATTTCAAAGT…	CGGCTTTAAAAAGTCCAGATTGAATGTCTTAAAATTGGATGTCATATTATAAGGATTTGTTGTGTAATAGCGTGATAAGCACGTGAATGGCTTGAAGCGTCTTACGGTGAAATTGAGACTGATAGGTGAGAGGTGAACCAATTGAGTGAGGAGTGGTTTAGTTACAAATGCAGAAGAAGAAGCTAAAAGAGATACGCCCATACAGAGCAATATCAAAATGAGCAAGAATGAGGTCTTCCGAATGGTTGGTTCTGACTTACTATTTGATTTCACTTTCTCTGATTCATTCAGGAAGAAAAGGGCGAAGTCCTCGAAATGAAAATTTCAACATCATTAACAGA
721	2570	187	187	0	0	NC_001134	347518	349584	NC_001136	815286	815745	|gene |tRNA note= GO_component: cytosol [goid 0005829] [evidence NAS] |gene |CDS[fcd=-674](+,347877,349382) note= Ybr056wp;	|gene gene= NGG1 note= synonyms: SWI7, ADA3 |CDS[fcd=-1066](+,814449,816557) gene= NGG1 note= Ngg1p;	CGGAGGAGCTACTAAAGAAAGAGTGCTGCAATTAATACAATTAATATAAGTGTGGTTATTGAAAATAACTATTCATTTATACGGAGGGTTGGCCGAGTGGTCTAAGGCGGCAGACTTAAGATCTGTTGGACGGTTGTCCGCGCGAGTTCGAACCTCGCATCCTTCAGTAATATTTTTTTAATATACATTTTCTCTGCCATCATGGCTTAAAAAATGCTTAAAAGAAGGGAATTAGGGGGGATGGATGAACTAAGACATAACTTTCTTTTCTTCAATTCGAACTCTGTTGGGAAGAGTTGCTTTAAAAAAGACTCTCTATCCATCTATAAAATTTATTAAAACTTTTGAACTGCACAGAATGATTGGCTCACTTAGAAACAAATTTGAGCATTTCAAAGT…	CGGATATGGACTTTTCGCATCCTAAACCAACCAACCAAATTCAATTCAATACCTTTCTAGCATTTGTGGAAAATTTTTTCAAAGATCTTAGTGATGACAACTTAAAGTTTTTGAAGATGAAATATATTATACCCGATAGCTTGCAATTTGACAAAACTTATGACCCTGAGGTAAACCCGTTTATTATACCGAAACTAGGCCCTTTATACACAGATGTTTGGTTCAAAGATGAAAACGACAAAAATTCTGCCTATAAAAAACCTTCACCATATTCAAACGATGCATCTACTATACTACCAAAAAAAAGTGCCAACGAACTTGATGATAATGCTTTGGAATCGGGCAGTATATCGTGTGGGCCCTTATTATCTAGGCTGTTGAGTGCTGTATTAAAAGATG…
721	747	316	316	0	0	NC_001134	347518	349584	NC_001134	370462	370766	|gene |tRNA note= GO_component: cytosol [goid 0005829] [evidence NAS] |gene |CDS[fcd=-674](+,347877,349382) note= Ybr056wp;	|gene gene= NRG2 |CDS[fcd=83](-,370035,370697) gene= NRG2 note= Nrg2p;	CGGAGGAGCTACTAAAGAAAGAGTGCTGCAATTAATACAATTAATATAAGTGTGGTTATTGAAAATAACTATTCATTTATACGGAGGGTTGGCCGAGTGGTCTAAGGCGGCAGACTTAAGATCTGTTGGACGGTTGTCCGCGCGAGTTCGAACCTCGCATCCTTCAGTAATATTTTTTTAATATACATTTTCTCTGCCATCATGGCTTAAAAAATGCTTAAAAGAAGGGAATTAGGGGGGATGGATGAACTAAGACATAACTTTCTTTTCTTCAATTCGAACTCTGTTGGGAAGAGTTGCTTTAAAAAAGACTCTCTATCCATCTATAAAATTTATTAAAACTTTTGAACTGCACAGAATGATTGGCTCACTTAGAAACAAATTTGAGCATTTCAAAGT…	CGGAGAAAAAATCGAAAGCGCACTTATTCAATTTATCTTTCAAGTCATCATCAATTAGATGTGATGTTTTCATCAAGGGTATCAGGGTTTGGTATTTCCTTTCATTGTTAAAAGAGAACATTTCAGGCATAAGAGTTATCTGGGAGGGCGAACATTCGAAATTGATGGGAAATTCACATTTCCTATCTTTAGCTAGAATAGTTGACATCAAGTTGTCTTTGTAACCTATGGACATCTGGAAATTTTGTAGAAGCTTTATATTTTTTGTTCTTCGAACAGTAGCGAGTGCTCATATGACTTGGTG
721	8876	62	83	0	9	NC_001134	347518	349584	NC_001144	460025	460609	|gene |tRNA note= GO_component: cytosol [goid 0005829] [evidence NAS] |gene |CDS[fcd=-674](+,347877,349382) note= Ybr056wp;	|rRNA |neigh_up CDS[fcd=-5620](+,454697,455071) gene= TAR1 note= Tar1p; |neigh_down CDS[fcd=2355](-,462523,462672) note= Ylr154c-gp;	CGGAGGAGCTACTAAAGAAAGAGTGCTGCAATTAATACAATTAATATAAGTGTGGTTATTGAAAATAACTATTCATTTATACGGAGGGTTGGCCGAGTGGTCTAAGGCGGCAGACTTAAGATCTGTTGGACGGTTGTCCGCGCGAGTTCGAACCTCGCATCCTTCAGTAATATTTTTTTAATATACATTTTCTCTGCCATCATGGCTTAAAAAATGCTTAAAAGAAGGGAATTAGGGGGGATGGATGAACTAAGACATAACTTTCTTTTCTTCAATTCGAACTCTGTTGGGAAGAGTTGCTTTAAAAAAGACTCTCTATCCATCTATAAAATTTATTAAAACTTTTGAACTGCACAGAATGATTGGCTCACTTAGAAACAAATTTGAGCATTTCAAAGT…	CGGTTTTGTTCTCTTCCCTCCATTTCCCTCTCTTCTACGGTTAATACTTTCCTCTTCGTCTTTTTCTACACCCTCGTTTAGTTGCTTCTTATTCCTTCCCGCTTTCCTGCACTAACATTTTGCCGCATTACACTATATGATCGTAGTACATCTTACAACTCCGCATACCGCGTCGCCGCGTCGCCGCGTCGCCAAAAATTTACTTCGCCAACCATTCCATATCTGTTAAGTATACATGTATATATTGCACTGGCTATTCATCTTGCACTTTTCCTCTTTCTTCTTCCCAGTAGCCTCATCCTTTTACGCTGCCTCTCTGGAACTTGCCATCATCATTCCCTAGAAACTGCCATTTACTTAAAAAAAAAAAAAAAAAAAAAATGTCCCCACTGTTCACTG…
721	7949	12	12	0	0	NC_001134	347518	349584	NC_001143	339819	340465	|gene |tRNA note= GO_component: cytosol [goid 0005829] [evidence NAS] |gene |CDS[fcd=-674](+,347877,349382) note= Ybr056wp;	|gene gene= ASK1 |CDS[fcd=48](-,339312,340190) gene= ASK1 note= Ask1p;	CGGAGGAGCTACTAAAGAAAGAGTGCTGCAATTAATACAATTAATATAAGTGTGGTTATTGAAAATAACTATTCATTTATACGGAGGGTTGGCCGAGTGGTCTAAGGCGGCAGACTTAAGATCTGTTGGACGGTTGTCCGCGCGAGTTCGAACCTCGCATCCTTCAGTAATATTTTTTTAATATACATTTTCTCTGCCATCATGGCTTAAAAAATGCTTAAAAGAAGGGAATTAGGGGGGATGGATGAACTAAGACATAACTTTCTTTTCTTCAATTCGAACTCTGTTGGGAAGAGTTGCTTTAAAAAAGACTCTCTATCCATCTATAAAATTTATTAAAACTTTTGAACTGCACAGAATGATTGGCTCACTTAGAAACAAATTTGAGCATTTCAAAGT…	CGGTTGACATGTACAGCTGAATCTGCCTCGTTAGGCCCATTGTCTGTCTGGGACTGCCTACTCGCCTCTTCAGCGGATGTAGGAAATATACCAACATTATTGCTCACAAGGCTTTTGACTGGAGCGTTTCCCACTGGTGCAGCTGCATTTGCCTGCAAATTCACCAGCCCAGTCTCTTGAAACATAGTCCCCAGCCATTCGGTGCTATCCATGATCCGCTCACATATTTCTGAATATGTAGCCACGTGTGGGATGATGTCCTGGGTGATCTTATGAAAGCAGAAACTCAAGTTAGAGTCTATCTTCTGCAGGTTCACTGTAATTTCTTGAACAAGTTTTTCCAATGTTTCCTCTTTGCTTGCAGAATCCATTTTTTGTGTCAACAATCCCTTATGTTGC…
721	745	338	338	0	0	NC_001134	347518	349584	NC_001134	369875	370347	|gene |tRNA note= GO_component: cytosol [goid 0005829] [evidence NAS] |gene |CDS[fcd=-674](+,347877,349382) note= Ybr056wp;	|gene gene= NRG2 |CDS[fcd=586](-,370035,370697) gene= NRG2 note= Nrg2p;	CGGAGGAGCTACTAAAGAAAGAGTGCTGCAATTAATACAATTAATATAAGTGTGGTTATTGAAAATAACTATTCATTTATACGGAGGGTTGGCCGAGTGGTCTAAGGCGGCAGACTTAAGATCTGTTGGACGGTTGTCCGCGCGAGTTCGAACCTCGCATCCTTCAGTAATATTTTTTTAATATACATTTTCTCTGCCATCATGGCTTAAAAAATGCTTAAAAGAAGGGAATTAGGGGGGATGGATGAACTAAGACATAACTTTCTTTTCTTCAATTCGAACTCTGTTGGGAAGAGTTGCTTTAAAAAAGACTCTCTATCCATCTATAAAATTTATTAAAACTTTTGAACTGCACAGAATGATTGGCTCACTTAGAAACAAATTTGAGCATTTCAAAGT…	CGGGTTGTGACTTAAAAAAATTACGAAAGAGAACCGACTATCGTTCCTGCTATTGTTCTTGGTGAGTATTACTAACCCGCTTAGTTTTATTACTATTTATCAGTCTTTTATTTGTACGTTATTTGAATATTTAAATGTTTTTGGCTGAGCTCACTCACATCAACTGCTAGCCTCCCTCCTCTTCCAGTTTCTTTTCTTCTTGTTTGCATGAGTTCGATAATGCTGATTACAGTTATCATGTCTACTAAACCTCTGTCCACAGCCCTCATGCGGACAGATATGATTTTTTTCACCTGTATGGATTCTGTTATGTCTTGAAAGATGACCAGAAGTGGTGAACCCAGTAGAGCAGATCTTACAGAAATGACGAGTCCTCTGTCCTGCTGTATTGGTTTTCGT…
721	744	16	16	0	0	NC_001134	347518	349584	NC_001134	369841	369874	|gene |tRNA note= GO_component: cytosol [goid 0005829] [evidence NAS] |gene |CDS[fcd=-674](+,347877,349382) note= Ybr056wp;	|neigh_up CDS[fcd=-181](-,368582,369676) gene= ECM2 note= Ecm2p; |neigh_down CDS[fcd=840](-,370035,370697) gene= NRG2 note= Nrg2p;	CGGAGGAGCTACTAAAGAAAGAGTGCTGCAATTAATACAATTAATATAAGTGTGGTTATTGAAAATAACTATTCATTTATACGGAGGGTTGGCCGAGTGGTCTAAGGCGGCAGACTTAAGATCTGTTGGACGGTTGTCCGCGCGAGTTCGAACCTCGCATCCTTCAGTAATATTTTTTTAATATACATTTTCTCTGCCATCATGGCTTAAAAAATGCTTAAAAGAAGGGAATTAGGGGGGATGGATGAACTAAGACATAACTTTCTTTTCTTCAATTCGAACTCTGTTGGGAAGAGTTGCTTTAAAAAAGACTCTCTATCCATCTATAAAATTTATTAAAACTTTTGAACTGCACAGAATGATTGGCTCACTTAGAAACAAATTTGAGCATTTCAAAGT…	CGGAATGAATAAGGTTTGAAACTTCACGTCCCT
721	7948	176	176	0	0	NC_001134	347518	349584	NC_001143	339731	339818	|gene |tRNA note= GO_component: cytosol [goid 0005829] [evidence NAS] |gene |CDS[fcd=-674](+,347877,349382) note= Ybr056wp;	|gene gene= ASK1 |CDS[fcd=416](-,339312,340190) gene= ASK1 note= Ask1p;	CGGAGGAGCTACTAAAGAAAGAGTGCTGCAATTAATACAATTAATATAAGTGTGGTTATTGAAAATAACTATTCATTTATACGGAGGGTTGGCCGAGTGGTCTAAGGCGGCAGACTTAAGATCTGTTGGACGGTTGTCCGCGCGAGTTCGAACCTCGCATCCTTCAGTAATATTTTTTTAATATACATTTTCTCTGCCATCATGGCTTAAAAAATGCTTAAAAGAAGGGAATTAGGGGGGATGGATGAACTAAGACATAACTTTCTTTTCTTCAATTCGAACTCTGTTGGGAAGAGTTGCTTTAAAAAAGACTCTCTATCCATCTATAAAATTTATTAAAACTTTTGAACTGCACAGAATGATTGGCTCACTTAGAAACAAATTTGAGCATTTCAAAGT…	CGGAAGTTTCAATATCTGTCCCGTGGATGTTATATTCGCTGTGTGGAAATCATCTATACTGTCGTTATTAAACATAGAATGGACATC
721	750	2	2	0	0	NC_001134	347518	349584	NC_001134	372170	373018	|gene |tRNA note= GO_component: cytosol [goid 0005829] [evidence NAS] |gene |CDS[fcd=-674](+,347877,349382) note= Ybr056wp;	|gene gene= TIP1 |CDS[fcd=138](-,372100,372732) gene= TIP1 note= Tip1p;	CGGAGGAGCTACTAAAGAAAGAGTGCTGCAATTAATACAATTAATATAAGTGTGGTTATTGAAAATAACTATTCATTTATACGGAGGGTTGGCCGAGTGGTCTAAGGCGGCAGACTTAAGATCTGTTGGACGGTTGTCCGCGCGAGTTCGAACCTCGCATCCTTCAGTAATATTTTTTTAATATACATTTTCTCTGCCATCATGGCTTAAAAAATGCTTAAAAGAAGGGAATTAGGGGGGATGGATGAACTAAGACATAACTTTCTTTTCTTCAATTCGAACTCTGTTGGGAAGAGTTGCTTTAAAAAAGACTCTCTATCCATCTATAAAATTTATTAAAACTTTTGAACTGCACAGAATGATTGGCTCACTTAGAAACAAATTTGAGCATTTCAAAGT…	CGGCATTGGAAGCAGTTTCGACTGTAGAAGTGCTGACAGAAGAGGTAGTTGGAGCGACAGAAGAAGAAACGGCCTTAGAAGATGATTCGGCAGATGATGATGGGGCAGCAGAAGAAGATGGGGCAGCAGAAGAGGATGGAGCGGCAGAGGATGTAGCTTCGGAAGAAGATGCAGCCTTGGAAGAAGATGCAGCCTCGGAAGAAGATGCAGCCTCGGAAGAAGCTGGGGAAACGGAGGCAAGAGCAGCAGCGATTTCAGAACTCAATCTTGTGGTGTACCATGGCAATTTAACAATTGTCTTAGTGATAGCATCAAAGTCCAATTCACTAAACAAGGTAGTGTAAGCGTCATCGGTGTAAGTCATGACTTGTTGATACACACTCAAGACATCAGATGGAA…
721	8875	1	1	0	0	NC_001134	347518	349584	NC_001144	459297	460024	|gene |tRNA note= GO_component: cytosol [goid 0005829] [evidence NAS] |gene |CDS[fcd=-674](+,347877,349382) note= Ybr056wp;	|rRNA |rRNA note= GO_component: cytosolic large ribosomal subunit |rRNA |neigh_up CDS[fcd=-4963](+,454697,455071) gene= TAR1 note= Tar1p; |neigh_down CDS[fcd=3012](-,462523,462672) note= Ylr154c-gp;	CGGAGGAGCTACTAAAGAAAGAGTGCTGCAATTAATACAATTAATATAAGTGTGGTTATTGAAAATAACTATTCATTTATACGGAGGGTTGGCCGAGTGGTCTAAGGCGGCAGACTTAAGATCTGTTGGACGGTTGTCCGCGCGAGTTCGAACCTCGCATCCTTCAGTAATATTTTTTTAATATACATTTTCTCTGCCATCATGGCTTAAAAAATGCTTAAAAGAAGGGAATTAGGGGGGATGGATGAACTAAGACATAACTTTCTTTTCTTCAATTCGAACTCTGTTGGGAAGAGTTGCTTTAAAAAAGACTCTCTATCCATCTATAAAATTTATTAAAACTTTTGAACTGCACAGAATGATTGGCTCACTTAGAAACAAATTTGAGCATTTCAAAGT…	CGGTGCCGTAAATGCAAAACAAATACCATCTATGTCTTCCACACCATCATTTTACTATGCCTGCCACCATCCATTTGTCTTTTGCACCATATCTTCATAACCTGTCACCTTGAAACTACCTCTGCATGCCACCTACCGACCAACTTTCATGTTCTGTTTCGACCTACCTCTTGTAAATGACAAATCACCTTTTTCATCGTATGCACCTTATTCTCCACATCACAATGCACTATTGCTTTTGCTTTTTCACCTGTCATATCCTATTGCTATTAGATGAAATATAATAAAAATTGTCCTCCACCCATAACACCTCTCACTCCCACCTACTGAACATGTCTGGACCCTGCCCTCATATCACCTGCGTTTCCGTTAAACTATCGGTTGCGGCCATATCTACCA…
721	5558	5	5	2171	2171	NC_001134	347518	349584	NC_001139	1070001	1070102	|gene |tRNA note= GO_component: cytosol [goid 0005829] [evidence NAS] |gene |CDS[fcd=-674](+,347877,349382) note= Ybr056wp;	|neigh_up CDS[fcd=-1053](-,1067229,1068998) note= Ygr287cp; |neigh_down CDS[fcd=249](+,1070300,1071721) gene= MAL13 note= Mal13p;	CGGAGGAGCTACTAAAGAAAGAGTGCTGCAATTAATACAATTAATATAAGTGTGGTTATTGAAAATAACTATTCATTTATACGGAGGGTTGGCCGAGTGGTCTAAGGCGGCAGACTTAAGATCTGTTGGACGGTTGTCCGCGCGAGTTCGAACCTCGCATCCTTCAGTAATATTTTTTTAATATACATTTTCTCTGCCATCATGGCTTAAAAAATGCTTAAAAGAAGGGAATTAGGGGGGATGGATGAACTAAGACATAACTTTCTTTTCTTCAATTCGAACTCTGTTGGGAAGAGTTGCTTTAAAAAAGACTCTCTATCCATCTATAAAATTTATTAAAACTTTTGAACTGCACAGAATGATTGGCTCACTTAGAAACAAATTTGAGCATTTCAAAGT…	CGGATCTTGAGGTTTCCCATTTTAGATGGAAATAAGCAGAGCAAAATAAAAATCTTGAACAAGTAATAGTGGTGACTGCAGGTTACGTTGGCATATAAAGT
721	737	28	28	0	0	NC_001134	347518	349584	NC_001134	363073	363412	|gene |tRNA note= GO_component: cytosol [goid 0005829] [evidence NAS] |gene |CDS[fcd=-674](+,347877,349382) note= Ybr056wp;	|neigh_up CDS[fcd=-730](-,360650,362512) gene= ORC2 note= Orc2p; |neigh_down CDS[fcd=2475](-,364785,365717) gene= TRM7 note= Trm7p;	CGGAGGAGCTACTAAAGAAAGAGTGCTGCAATTAATACAATTAATATAAGTGTGGTTATTGAAAATAACTATTCATTTATACGGAGGGTTGGCCGAGTGGTCTAAGGCGGCAGACTTAAGATCTGTTGGACGGTTGTCCGCGCGAGTTCGAACCTCGCATCCTTCAGTAATATTTTTTTAATATACATTTTCTCTGCCATCATGGCTTAAAAAATGCTTAAAAGAAGGGAATTAGGGGGGATGGATGAACTAAGACATAACTTTCTTTTCTTCAATTCGAACTCTGTTGGGAAGAGTTGCTTTAAAAAAGACTCTCTATCCATCTATAAAATTTATTAAAACTTTTGAACTGCACAGAATGATTGGCTCACTTAGAAACAAATTTGAGCATTTCAAAGT…	CGGTTTATAGTCATCTCAATACTAGATCACAGCAAATCCAATTAAGAAACAGACTCTTGATATAAATTTTTATCCATACAAGTTCCGATTATATATATTCAATCCTGAATTTTTGGCCAAGTATGCCCATTCAAAAAGGCGAAAATTTCCCTTAAGAGAAGTTTCACATTGCTAGGAGAGTTCATGCAGAAAGAGAATCAGCTTAAAAATTGAAATTCTACGTTCTCAATGGTGGTGTTGAGCTCTAAATTATTTTACAATTTCAGGATTATTACGACGAGAACCCATAAAAAGGAGCATGACCTTTAAGGAGGAGTAATATATATCCACCAAAGAAGA
721	6984	6	6	0	0	NC_001134	347518	349584	NC_001142	224995	225059	|gene |tRNA note= GO_component: cytosol [goid 0005829] [evidence NAS] |gene |CDS[fcd=-674](+,347877,349382) note= Ybr056wp;	|gene gene= SET4 |CDS[fcd=24](+,225051,226733) gene= SET4 note= Set4p;	CGGAGGAGCTACTAAAGAAAGAGTGCTGCAATTAATACAATTAATATAAGTGTGGTTATTGAAAATAACTATTCATTTATACGGAGGGTTGGCCGAGTGGTCTAAGGCGGCAGACTTAAGATCTGTTGGACGGTTGTCCGCGCGAGTTCGAACCTCGCATCCTTCAGTAATATTTTTTTAATATACATTTTCTCTGCCATCATGGCTTAAAAAATGCTTAAAAGAAGGGAATTAGGGGGGATGGATGAACTAAGACATAACTTTCTTTTCTTCAATTCGAACTCTGTTGGGAAGAGTTGCTTTAAAAAAGACTCTCTATCCATCTATAAAATTTATTAAAACTTTTGAACTGCACAGAATGATTGGCTCACTTAGAAACAAATTTGAGCATTTCAAAGT…	CGGAATAAGATTGGTACCCTCGTCAGAAAGTTACAAATACCGCTTCATCTTCAAAATGACTTCA
721	736	41	41	0	0	NC_001134	347518	349584	NC_001134	362461	363072	|gene |tRNA note= GO_component: cytosol [goid 0005829] [evidence NAS] |gene |CDS[fcd=-674](+,347877,349382) note= Ybr056wp;	|gene gene= ORC2 note= synonyms: SIR5, RRR1 |CDS[fcd=-254](-,360650,362512) gene= ORC2 note= Orc2p;	CGGAGGAGCTACTAAAGAAAGAGTGCTGCAATTAATACAATTAATATAAGTGTGGTTATTGAAAATAACTATTCATTTATACGGAGGGTTGGCCGAGTGGTCTAAGGCGGCAGACTTAAGATCTGTTGGACGGTTGTCCGCGCGAGTTCGAACCTCGCATCCTTCAGTAATATTTTTTTAATATACATTTTCTCTGCCATCATGGCTTAAAAAATGCTTAAAAGAAGGGAATTAGGGGGGATGGATGAACTAAGACATAACTTTCTTTTCTTCAATTCGAACTCTGTTGGGAAGAGTTGCTTTAAAAAAGACTCTCTATCCATCTATAAAATTTATTAAAACTTTTGAACTGCACAGAATGATTGGCTCACTTAGAAACAAATTTGAGCATTTCAAAGT…	CGGAGACGATAGGATATCATTATGCTCTACAAAGTCTTCCCCATTTAGCATGTTATGGCAATTCGCAGTACTACAAAAACTTGTTTTAAAGATATAGCAAATAAGATCAATGATCAATTATCAAATACAATTTCAGCTAATATATTCTACTTTGTCTTAATTTAAAGGTGGTTCCTATTTCTTTATAACTTTTACACATTGTGAAGAATAACAATTCTGCTTACTATTGTCATTTCCACCTCAATGATGCGGTGAGTGGGTGTTCTGAAAAATTTTCCCGATTTTGCTAGACTAGAAATTGGTACTAGCTGATCCATATCACATTTACGCGAATAAGTCGATATTTATGCATGGATATTTGGCCTTTTACGACACTTATTCTTATGATCCATTGAAAGA…
721	2686	3	3	0	0	NC_001134	347518	349584	NC_001136	930838	931274	|gene |tRNA note= GO_component: cytosol [goid 0005829] [evidence NAS] |gene |CDS[fcd=-674](+,347877,349382) note= Ybr056wp;	|gene gene= LYS4 note= synonym: LYS3 |CDS[fcd=69](+,931125,933206) gene= LYS4 note= Lys4p;	CGGAGGAGCTACTAAAGAAAGAGTGCTGCAATTAATACAATTAATATAAGTGTGGTTATTGAAAATAACTATTCATTTATACGGAGGGTTGGCCGAGTGGTCTAAGGCGGCAGACTTAAGATCTGTTGGACGGTTGTCCGCGCGAGTTCGAACCTCGCATCCTTCAGTAATATTTTTTTAATATACATTTTCTCTGCCATCATGGCTTAAAAAATGCTTAAAAGAAGGGAATTAGGGGGGATGGATGAACTAAGACATAACTTTCTTTTCTTCAATTCGAACTCTGTTGGGAAGAGTTGCTTTAAAAAAGACTCTCTATCCATCTATAAAATTTATTAAAACTTTTGAACTGCACAGAATGATTGGCTCACTTAGAAACAAATTTGAGCATTTCAAAGT…	CGGGATTTTGCTCGAGATGACTGAAATTTTGTAATCGATGAGTCTATACCAGAGGCAGCAAATATCACCAACATACACAGGTATACACAATCTCATGTCCACACACACGTACAGACACGCACATATATATATATATATATATATCCCCATAGGTATTTATATATACAAAAGAATCCTCGTGTGTTTGTGTGTGCAATAGCTAGTTTTGCGCTGCCTCTTATAGTAGACAATATCACTTTTTCAATAAAATAGAACTTGCAAGGAAACAAAATTGTATCGCTTCAAGATGCTACGATCAACCACATTTACTCGTTCGTTCCACAGTTCTAGGGCCTGGTTGAAAGGTCAGAACCTAACTGAAAAAATTGTTCAGTCGTATGCGGTCAACCTTCCCGAGGG…
721	1705	17	17	0	0	NC_001134	347518	349584	NC_001136	62264	62642	|gene |tRNA note= GO_component: cytosol [goid 0005829] [evidence NAS] |gene |CDS[fcd=-674](+,347877,349382) note= Ybr056wp;	|gene gene= CDC13 note= synonym: EST4 |CDS[fcd=2566](-,62245,65019) gene= CDC13 note= Cdc13p;	CGGAGGAGCTACTAAAGAAAGAGTGCTGCAATTAATACAATTAATATAAGTGTGGTTATTGAAAATAACTATTCATTTATACGGAGGGTTGGCCGAGTGGTCTAAGGCGGCAGACTTAAGATCTGTTGGACGGTTGTCCGCGCGAGTTCGAACCTCGCATCCTTCAGTAATATTTTTTTAATATACATTTTCTCTGCCATCATGGCTTAAAAAATGCTTAAAAGAAGGGAATTAGGGGGGATGGATGAACTAAGACATAACTTTCTTTTCTTCAATTCGAACTCTGTTGGGAAGAGTTGCTTTAAAAAAGACTCTCTATCCATCTATAAAATTTATTAAAACTTTTGAACTGCACAGAATGATTGGCTCACTTAGAAACAAATTTGAGCATTTCAAAGT…	CGGCGTCATCGTCATTATCCTCCTCCTTTTTCACGGTGACGCCATTTTGCGCGGCAAGAAGTCGCAGAGGATTGACGGTAGCATTAATTGCGCAATCAAGACTCCCTGAATCAGGAGCCGCTGCAACCTTCGGATGGGCCAGCTGTTGTTGCAATTCCCGAAAGGTGCATTCAATTGGGCACCAGATCTGGAGTGCCACGGTAGTGTCAGGGAACAGCGTGAGCGAGGAGGTTATATTGAATTTAAATGAATGGCCGAGAAATTGTGCCAATTGCGTATATTTTTCCTCAAGAGGCTGACGCTGTAAGTAGGCGCTTGAGCGGTTGAAAAAATAAGCAAAGTTCTTGGAGGTAATGATGTGTAGTTGCAACACTCGCT
721	740	1188	1436	5	5	NC_001134	347518	349584	NC_001134	364242	364450	|gene |tRNA note= GO_component: cytosol [goid 0005829] [evidence NAS] |gene |CDS[fcd=-674](+,347877,349382) note= Ybr056wp;	|neigh_up CDS[fcd=-1834](-,360650,362512) gene= ORC2 note= Orc2p; |neigh_down CDS[fcd=1371](-,364785,365717) gene= TRM7 note= Trm7p;	CGGAGGAGCTACTAAAGAAAGAGTGCTGCAATTAATACAATTAATATAAGTGTGGTTATTGAAAATAACTATTCATTTATACGGAGGGTTGGCCGAGTGGTCTAAGGCGGCAGACTTAAGATCTGTTGGACGGTTGTCCGCGCGAGTTCGAACCTCGCATCCTTCAGTAATATTTTTTTAATATACATTTTCTCTGCCATCATGGCTTAAAAAATGCTTAAAAGAAGGGAATTAGGGGGGATGGATGAACTAAGACATAACTTTCTTTTCTTCAATTCGAACTCTGTTGGGAAGAGTTGCTTTAAAAAAGACTCTCTATCCATCTATAAAATTTATTAAAACTTTTGAACTGCACAGAATGATTGGCTCACTTAGAAACAAATTTGAGCATTTCAAAGT…	CGGGTTTATGTGAGCGTTTCGAGGTTTTTGTATCTAAAAAGGAGATATGTAATGCGTAAACCCGAACTGAACAATTCGTTTGACCAAAAGGGGCTTTCCTACAAACAAGCAGGGCAATAGGAGCAAGGCAAATGGATCAAGGTGATGCTTATGCATAATTTATACGATGGAATCCTTTGTAATGCTCCGTACTACGGTTTACCACCAA
721	762	4	4	0	0	NC_001134	347518	349584	NC_001134	378051	378110	|gene |tRNA note= GO_component: cytosol [goid 0005829] [evidence NAS] |gene |CDS[fcd=-674](+,347877,349382) note= Ybr056wp;	|gene gene= TAT1 note= synonyms: VAP1, TAP1 |CDS[fcd=350](-,376571,378430) gene= TAT1 note= Tat1p;	CGGAGGAGCTACTAAAGAAAGAGTGCTGCAATTAATACAATTAATATAAGTGTGGTTATTGAAAATAACTATTCATTTATACGGAGGGTTGGCCGAGTGGTCTAAGGCGGCAGACTTAAGATCTGTTGGACGGTTGTCCGCGCGAGTTCGAACCTCGCATCCTTCAGTAATATTTTTTTAATATACATTTTCTCTGCCATCATGGCTTAAAAAATGCTTAAAAGAAGGGAATTAGGGGGGATGGATGAACTAAGACATAACTTTCTTTTCTTCAATTCGAACTCTGTTGGGAAGAGTTGCTTTAAAAAAGACTCTCTATCCATCTATAAAATTTATTAAAACTTTTGAACTGCACAGAATGATTGGCTCACTTAGAAACAAATTTGAGCATTTCAAAGT…	CGGCAGGACCAGCTGTTCCCAGCACCTGACCATTACCGACCAGTAAACCAGTACCTATA
721	12715	12	12	0	0	NC_001134	347518	349584	NC_001147	987897	988129	|gene |tRNA note= GO_component: cytosol [goid 0005829] [evidence NAS] |gene |CDS[fcd=-674](+,347877,349382) note= Ybr056wp;	|gene gene= PUT4 |CDS[fcd=766](-,986896,988779) gene= PUT4 note= Put4p;	CGGAGGAGCTACTAAAGAAAGAGTGCTGCAATTAATACAATTAATATAAGTGTGGTTATTGAAAATAACTATTCATTTATACGGAGGGTTGGCCGAGTGGTCTAAGGCGGCAGACTTAAGATCTGTTGGACGGTTGTCCGCGCGAGTTCGAACCTCGCATCCTTCAGTAATATTTTTTTAATATACATTTTCTCTGCCATCATGGCTTAAAAAATGCTTAAAAGAAGGGAATTAGGGGGGATGGATGAACTAAGACATAACTTTCTTTTCTTCAATTCGAACTCTGTTGGGAAGAGTTGCTTTAAAAAAGACTCTCTATCCATCTATAAAATTTATTAAAACTTTTGAACTGCACAGAATGATTGGCTCACTTAGAAACAAATTTGAGCATTTCAAAGT…	CGGATGTTGCCAGTATCTGAAGCCAAGACGGTCATGGTTGGGGCCACCACCCCAAAACAAAATAAAGGACAGAATGATCAGTCCCACAATGCATAATATCTTGATAGACGCGAACCAAAACTCGGATTCGCCGTACACTTTGACCGCGGAAAAGTTTAGTATAACAACCACGCATAGAAAGATCGTGATCCAAACGCCCTTGGGAACCGCGGTGGTCCAGTATTCGACCACA
721	763	12	12	0	0	NC_001134	347518	349584	NC_001134	378111	378818	|gene |tRNA note= GO_component: cytosol [goid 0005829] [evidence NAS] |gene |CDS[fcd=-674](+,347877,349382) note= Ybr056wp;	|gene gene= TAT1 note= synonyms: VAP1, TAP1 |CDS[fcd=-34](-,376571,378430) gene= TAT1 note= Tat1p;	CGGAGGAGCTACTAAAGAAAGAGTGCTGCAATTAATACAATTAATATAAGTGTGGTTATTGAAAATAACTATTCATTTATACGGAGGGTTGGCCGAGTGGTCTAAGGCGGCAGACTTAAGATCTGTTGGACGGTTGTCCGCGCGAGTTCGAACCTCGCATCCTTCAGTAATATTTTTTTAATATACATTTTCTCTGCCATCATGGCTTAAAAAATGCTTAAAAGAAGGGAATTAGGGGGGATGGATGAACTAAGACATAACTTTCTTTTCTTCAATTCGAACTCTGTTGGGAAGAGTTGCTTTAAAAAAGACTCTCTATCCATCTATAAAATTTATTAAAACTTTTGAACTGCACAGAATGATTGGCTCACTTAGAAACAAATTTGAGCATTTCAAAGT…	CGGTACCGAGACTGATCATGACTAAGTGACGAGATTTGATCGACTTTGTCAGGTTGTTTTTTTCTTGGGACTCTAGTTCGGAATTACGGTCTGGTGGCAGCTGCCTTTTAAAAGAGTCGAAGAATTCTTTGCATTTCCTCTGTAATATGGATTTGCTGTCCGTCCTTCGAGGCTCCGCTGTTTGTCCAGATACCTCATCTTGTTTTTCTGTTATTGTAAAGTCTCTCTTTTGTTTTTCACTGTGTGTTCTTTCATGCAAACTGTGCGAATATTGTGCTGGACTGGCCTCTTTGGCAATGAAACTGACACTATCGTCCATTTTTACGCCTTTTTATCGAGAAACTATATTAGGTAGCTACGGTGGTAAAGGCACCTTATAATACAGCTTGGTTCTATGTA…
721	6518	112	112	0	0	NC_001134	347518	349584	NC_001141	242130	242357	|gene |tRNA note= GO_component: cytosol [goid 0005829] [evidence NAS] |gene |CDS[fcd=-674](+,347877,349382) note= Ybr056wp;	|gene |CDS[fcd=-303](+,241940,242713) note= Yil064wp;	CGGAGGAGCTACTAAAGAAAGAGTGCTGCAATTAATACAATTAATATAAGTGTGGTTATTGAAAATAACTATTCATTTATACGGAGGGTTGGCCGAGTGGTCTAAGGCGGCAGACTTAAGATCTGTTGGACGGTTGTCCGCGCGAGTTCGAACCTCGCATCCTTCAGTAATATTTTTTTAATATACATTTTCTCTGCCATCATGGCTTAAAAAATGCTTAAAAGAAGGGAATTAGGGGGGATGGATGAACTAAGACATAACTTTCTTTTCTTCAATTCGAACTCTGTTGGGAAGAGTTGCTTTAAAAAAGACTCTCTATCCATCTATAAAATTTATTAAAACTTTTGAACTGCACAGAATGATTGGCTCACTTAGAAACAAATTTGAGCATTTCAAAGT…	CGGGGACTGTTGGTTTAGCGATAGCGATGCTGAACAAAAGATGATTGATTTTCTGGTAGATAACATTGGTGCGTACAGAATTTCTGAGAATGCTTCTGTTGTAGACCTCGGTACAGGTAATGGACACATGTTATTTGAACTGCATCAAACGGAATTCCAAGGGAAACTGGTCGGGATAGACTATTCTGAGGAAAGCGTCAAACTCGCTAGTAATATAGCCGAGGCCA
721	6016	1	1	0	0	NC_001134	347518	349584	NC_001140	372523	373714	|gene |tRNA note= GO_component: cytosol [goid 0005829] [evidence NAS] |gene |CDS[fcd=-674](+,347877,349382) note= Ybr056wp;	|gene gene= WSS1 |CDS(+,371752,372561) gene= WSS1 note= Wss1p; |gene gene= YCK1 note= synonym: CKI2 |CDS(-,372697,374313) gene= YCK1 note= Yck1p;	CGGAGGAGCTACTAAAGAAAGAGTGCTGCAATTAATACAATTAATATAAGTGTGGTTATTGAAAATAACTATTCATTTATACGGAGGGTTGGCCGAGTGGTCTAAGGCGGCAGACTTAAGATCTGTTGGACGGTTGTCCGCGCGAGTTCGAACCTCGCATCCTTCAGTAATATTTTTTTAATATACATTTTCTCTGCCATCATGGCTTAAAAAATGCTTAAAAGAAGGGAATTAGGGGGGATGGATGAACTAAGACATAACTTTCTTTTCTTCAATTCGAACTCTGTTGGGAAGAGTTGCTTTAAAAAAGACTCTCTATCCATCTATAAAATTTATTAAAACTTTTGAACTGCACAGAATGATTGGCTCACTTAGAAACAAATTTGAGCATTTCAAAGT…	CGGGAGATACTCTTATCGAAGTTATTGATCTCACTTAATCTCTTGTCCACAGCGAAGAACTCGAAAATTATAAGTATGGTAAATGTCGTTTCGGTTGTAAAGTATACAGATATATTCACATTACAAAAAATGTAAGAAAGACGGTAGTCTTGCAAAAAATGTCATTTCTATATTTAGCAACAACCTAATTTTTGGAAAAAGCCCTTATGAGAAGCAGCTAGACTTGAATTATCGTCATTTGGGTGCTGTTCAGGAGTTCTTAAAGCAGCAGAAGGTTGTTGTTGTGGTTGATAACGAGCGCCAAACTGCTGAGATTGAGTTTGCGCTTGAGGCTGAGATGGAGGTTGGCCTGTTGCACGTAGCTGTTGCTGTTGCTGTTGCTGCTGTTGCAATTGTTGC…
721	13194	5	5	0	0	NC_001134	347518	349584	NC_001148	338782	339226	|gene |tRNA note= GO_component: cytosol [goid 0005829] [evidence NAS] |gene |CDS[fcd=-674](+,347877,349382) note= Ybr056wp;	|gene gene= IMT2 |tRNA gene= IMT2 note= GO_component: cytosol [goid 0005829] [evidence NAS] |neigh_up CDS[fcd=-385](-,337435,338619) gene= PEX25 note= Pex25p; |neigh_down CDS[fcd=939](+,339943,340944) gene= CAR1 note= Car1p;	CGGAGGAGCTACTAAAGAAAGAGTGCTGCAATTAATACAATTAATATAAGTGTGGTTATTGAAAATAACTATTCATTTATACGGAGGGTTGGCCGAGTGGTCTAAGGCGGCAGACTTAAGATCTGTTGGACGGTTGTCCGCGCGAGTTCGAACCTCGCATCCTTCAGTAATATTTTTTTAATATACATTTTCTCTGCCATCATGGCTTAAAAAATGCTTAAAAGAAGGGAATTAGGGGGGATGGATGAACTAAGACATAACTTTCTTTTCTTCAATTCGAACTCTGTTGGGAAGAGTTGCTTTAAAAAAGACTCTCTATCCATCTATAAAATTTATTAAAACTTTTGAACTGCACAGAATGATTGGCTCACTTAGAAACAAATTTGAGCATTTCAAAGT…	CGGAATTTCATATACTATCACCGACCTGGAAAAAAAATGAAGAGTAAAAAGAAAAAAATAAATTTAGCGCCGCTCGGTTTCGATCCGAGGACATCAGGGTTATGAGCCCTGCGCGCTTCCACTGCGCCACGGCGCTGCTAAATCATGTGAGTTTAGCGCGTACCGAGCAAATTCACCAAAATATTTACATCCAATTTGCTCCCCTCACTCTTCCCCGATGTCGGTTGTGATTACTGCTACGCATGGCGACTCTTAATTTCTTTCAGGTATAGTAACATTTACTCCTTTAAGTAATTGTCTATTTTTCCTCGACACTGTATGTAGTTACCTTTCAAGGAAGCTATTCCAATACCATCGTGAGAAAAACTCTATTGGATACTTCATCTAGCTCGTATATAT…
721	3621	1518	1518	0	0	NC_001134	347518	349584	NC_001137	222046	222354	|gene |tRNA note= GO_component: cytosol [goid 0005829] [evidence NAS] |gene |CDS[fcd=-674](+,347877,349382) note= Ybr056wp;	|gene |CDS[fcd=-355](+,221845,222402) note= Yer034wp;	CGGAGGAGCTACTAAAGAAAGAGTGCTGCAATTAATACAATTAATATAAGTGTGGTTATTGAAAATAACTATTCATTTATACGGAGGGTTGGCCGAGTGGTCTAAGGCGGCAGACTTAAGATCTGTTGGACGGTTGTCCGCGCGAGTTCGAACCTCGCATCCTTCAGTAATATTTTTTTAATATACATTTTCTCTGCCATCATGGCTTAAAAAATGCTTAAAAGAAGGGAATTAGGGGGGATGGATGAACTAAGACATAACTTTCTTTTCTTCAATTCGAACTCTGTTGGGAAGAGTTGCTTTAAAAAAGACTCTCTATCCATCTATAAAATTTATTAAAACTTTTGAACTGCACAGAATGATTGGCTCACTTAGAAACAAATTTGAGCATTTCAAAGT…	CGGTACTCGAGGACCCGCATTCTGCAGTCGCCAATGCAGAGTTGAACAAGGTGCTAAAAGACGTCCTCAAAAATCGGCTCCAGCAGAACGACGACGCCACAGCCGTCAATAATGTTGCTAATAAAGATACTTTGAAAATCAAAGACCTCAAGCAGATGAATACGGATGAGCTCAATCGTTGGCTCGGACGGCAGAATACAACATCGGCTATAACAGCGGCTGAGCCCGAATCATTAGTCGTTCCCATTCACGTACAAGGTGATCATGATCGTGCGGGCAAGAAGATCAGTGCCCCTTCGACCGATCTA
721	758	169	169	0	0	NC_001134	347518	349584	NC_001134	375605	376063	|gene |tRNA note= GO_component: cytosol [goid 0005829] [evidence NAS] |gene |CDS[fcd=-674](+,347877,349382) note= Ybr056wp;	|gene gene= BAP2 |CDS[fcd=-147](-,373858,375687) gene= BAP2 note= Bap2p;	CGGAGGAGCTACTAAAGAAAGAGTGCTGCAATTAATACAATTAATATAAGTGTGGTTATTGAAAATAACTATTCATTTATACGGAGGGTTGGCCGAGTGGTCTAAGGCGGCAGACTTAAGATCTGTTGGACGGTTGTCCGCGCGAGTTCGAACCTCGCATCCTTCAGTAATATTTTTTTAATATACATTTTCTCTGCCATCATGGCTTAAAAAATGCTTAAAAGAAGGGAATTAGGGGGGATGGATGAACTAAGACATAACTTTCTTTTCTTCAATTCGAACTCTGTTGGGAAGAGTTGCTTTAAAAAAGACTCTCTATCCATCTATAAAATTTATTAAAACTTTTGAACTGCACAGAATGATTGGCTCACTTAGAAACAAATTTGAGCATTTCAAAGT…	CGGCACTAAAGGAACGTATCGATATCGAATCAGGAGAAGTTTCCTTTTTCCCAGAAGATCCAAAATCTTCTGAAGATAGCATTTCTAAAATCACTTGAGTTTTATTGAAGCTAAATAAATTGATAGTATCGAAAAAGGACCTTCGTTTCAACACTAGCTAGAGATAGTAATAATCTAATGGCAAAATAGCCATTATACGTACCTAATATATACGTATATATACGAGGAGATGTGCTCATCAAAGAAGTGGCATTTCACCCTGAAATTTTTTTTCTTTTTCTCGCTGAAGAGTCATTCCTAGTAAAGCATGCTACTTTTCAGTATATTCCATTATATTTTTAACTACAAGCGGCGCAGAAACCAGAGGATCAGCCACTGCTAGCAGCATTTGCTGCTGAC…
721	3619	1	1	0	0	NC_001134	347518	349584	NC_001137	221691	221939	|gene |tRNA note= GO_component: cytosol [goid 0005829] [evidence NAS] |gene |CDS[fcd=-674](+,347877,349382) note= Ybr056wp;	|gene |CDS[fcd=30](+,221845,222402) note= Yer034wp;	CGGAGGAGCTACTAAAGAAAGAGTGCTGCAATTAATACAATTAATATAAGTGTGGTTATTGAAAATAACTATTCATTTATACGGAGGGTTGGCCGAGTGGTCTAAGGCGGCAGACTTAAGATCTGTTGGACGGTTGTCCGCGCGAGTTCGAACCTCGCATCCTTCAGTAATATTTTTTTAATATACATTTTCTCTGCCATCATGGCTTAAAAAATGCTTAAAAGAAGGGAATTAGGGGGGATGGATGAACTAAGACATAACTTTCTTTTCTTCAATTCGAACTCTGTTGGGAAGAGTTGCTTTAAAAAAGACTCTCTATCCATCTATAAAATTTATTAAAACTTTTGAACTGCACAGAATGATTGGCTCACTTAGAAACAAATTTGAGCATTTCAAAGT…	CGGATTGAAGAAAGCTGGCGGGTGTATGGGTGAAGGAGAAGAAAGGAAGTGATTAGGAGAAACCTCATGGAGATGAGCACATGCTACAACTAATAACGTTATTCTACTTAAAACGAGCAAAACAAAAAAAAAAACAAGACAATTGAAAACGCAATGGATGCATTCAGCTTAAAGAAGGATAATCGAAAAAAATTTCAAGATAAACAGAAATTGAAAAGAAAACATGCCACACCCAGTGATAGAAAGTA
721	713	1089	1089	0	0	NC_001134	347518	349584	NC_001134	341704	341906	|gene |tRNA note= GO_component: cytosol [goid 0005829] [evidence NAS] |gene |CDS[fcd=-674](+,347877,349382) note= Ybr056wp;	|neigh_up CDS[fcd=-1056](-,339673,340749) note= Ybr053cp; |neigh_down CDS[fcd=1294](+,343099,344133) gene= YRO2 note= Yro2p;	CGGAGGAGCTACTAAAGAAAGAGTGCTGCAATTAATACAATTAATATAAGTGTGGTTATTGAAAATAACTATTCATTTATACGGAGGGTTGGCCGAGTGGTCTAAGGCGGCAGACTTAAGATCTGTTGGACGGTTGTCCGCGCGAGTTCGAACCTCGCATCCTTCAGTAATATTTTTTTAATATACATTTTCTCTGCCATCATGGCTTAAAAAATGCTTAAAAGAAGGGAATTAGGGGGGATGGATGAACTAAGACATAACTTTCTTTTCTTCAATTCGAACTCTGTTGGGAAGAGTTGCTTTAAAAAAGACTCTCTATCCATCTATAAAATTTATTAAAACTTTTGAACTGCACAGAATGATTGGCTCACTTAGAAACAAATTTGAGCATTTCAAAGT…	CGGTTGCCTCCAAAGCCCTTCTTTCTTAACGCGAGTACCGCTTTGGGAGGCCTCATCTTGGTTGTGTCCTCGTATGGCAGCATCTGCCATTGAGCGAACCCTTTCCCGTTTTACGCGCATGGCCTAGACCGATCTTTAGCAGACATGCCGAGTGAATTTACCTAAGATTTCTAAGGACTCTTCTGCATGTTTCCGAAAATCA
721	712	1493	1493	12	12	NC_001134	347518	349584	NC_001134	341649	341703	|gene |tRNA note= GO_component: cytosol [goid 0005829] [evidence NAS] |gene |CDS[fcd=-674](+,347877,349382) note= Ybr056wp;	|neigh_up CDS[fcd=-927](-,339673,340749) note= Ybr053cp; |neigh_down CDS[fcd=1423](+,343099,344133) gene= YRO2 note= Yro2p;	CGGAGGAGCTACTAAAGAAAGAGTGCTGCAATTAATACAATTAATATAAGTGTGGTTATTGAAAATAACTATTCATTTATACGGAGGGTTGGCCGAGTGGTCTAAGGCGGCAGACTTAAGATCTGTTGGACGGTTGTCCGCGCGAGTTCGAACCTCGCATCCTTCAGTAATATTTTTTTAATATACATTTTCTCTGCCATCATGGCTTAAAAAATGCTTAAAAGAAGGGAATTAGGGGGGATGGATGAACTAAGACATAACTTTCTTTTCTTCAATTCGAACTCTGTTGGGAAGAGTTGCTTTAAAAAAGACTCTCTATCCATCTATAAAATTTATTAAAACTTTTGAACTGCACAGAATGATTGGCTCACTTAGAAACAAATTTGAGCATTTCAAAGT…	CGGGTGGCAACCATTCTCCAACATTAGACAAACTTTACAAAGAAGACACCCTAC
721	715	2125	2125	0	0	NC_001134	347518	349584	NC_001134	342115	342401	|gene |tRNA note= GO_component: cytosol [goid 0005829] [evidence NAS] |gene |CDS[fcd=-674](+,347877,349382) note= Ybr056wp;	|neigh_up CDS[fcd=-1509](-,339673,340749) note= Ybr053cp; |neigh_down CDS[fcd=841](+,343099,344133) gene= YRO2 note= Yro2p;	CGGAGGAGCTACTAAAGAAAGAGTGCTGCAATTAATACAATTAATATAAGTGTGGTTATTGAAAATAACTATTCATTTATACGGAGGGTTGGCCGAGTGGTCTAAGGCGGCAGACTTAAGATCTGTTGGACGGTTGTCCGCGCGAGTTCGAACCTCGCATCCTTCAGTAATATTTTTTTAATATACATTTTCTCTGCCATCATGGCTTAAAAAATGCTTAAAAGAAGGGAATTAGGGGGGATGGATGAACTAAGACATAACTTTCTTTTCTTCAATTCGAACTCTGTTGGGAAGAGTTGCTTTAAAAAAGACTCTCTATCCATCTATAAAATTTATTAAAACTTTTGAACTGCACAGAATGATTGGCTCACTTAGAAACAAATTTGAGCATTTCAAAGT…	CGGTGTGTTTGTTCATATCACGGCATACGTTAACACAATGTAAATCTTGCTTTGGGTTGACTGAGGGAAATAACTATAGACATCACACCAATGGCTAAGGGATATTTCGACCTCGCTATGGGTTCTAAATGAGGGAATGGAAAAAAAGGGTAAATTGAAAACAACCTACCGATTTTGGTACCACTTCCGTGATTTTCGATTCTTCAATTTCCGCATAATTTGCCTCAAATAGGAAATCTGAGCTGTTTTTTTCTTACCCTCGAGTGGTCGTTCTGCGGACTTTTCT
721	714	5158	5158	12	12	NC_001134	347518	349584	NC_001134	341907	342114	|gene |tRNA note= GO_component: cytosol [goid 0005829] [evidence NAS] |gene |CDS[fcd=-674](+,347877,349382) note= Ybr056wp;	|neigh_up CDS[fcd=-1261](-,339673,340749) note= Ybr053cp; |neigh_down CDS[fcd=1089](+,343099,344133) gene= YRO2 note= Yro2p;	CGGAGGAGCTACTAAAGAAAGAGTGCTGCAATTAATACAATTAATATAAGTGTGGTTATTGAAAATAACTATTCATTTATACGGAGGGTTGGCCGAGTGGTCTAAGGCGGCAGACTTAAGATCTGTTGGACGGTTGTCCGCGCGAGTTCGAACCTCGCATCCTTCAGTAATATTTTTTTAATATACATTTTCTCTGCCATCATGGCTTAAAAAATGCTTAAAAGAAGGGAATTAGGGGGGATGGATGAACTAAGACATAACTTTCTTTTCTTCAATTCGAACTCTGTTGGGAAGAGTTGCTTTAAAAAAGACTCTCTATCCATCTATAAAATTTATTAAAACTTTTGAACTGCACAGAATGATTGGCTCACTTAGAAACAAATTTGAGCATTTCAAAGT…	CGGAAAAACCTTCGGTTTTTTTAGACGAAAACTAGGAAGTTGCTTAGCTTTCCTTGTCGTCTTCAAATCTATATGCCATCGGAAGAGAATCAGAAGAGAAGATCACGACTTAAGAGCTTTGCTGTTAAGATAGCAAGAAAGCTTGCCAATAGGCAGTTATGTAACCTAGTTTATCTACACCTTCTTTGATTAACTTAGCTATGTAGG
721	717	5	5	0	0	NC_001134	347518	349584	NC_001134	343163	346101	|gene |tRNA note= GO_component: cytosol [goid 0005829] [evidence NAS] |gene |CDS[fcd=-674](+,347877,349382) note= Ybr056wp;	|gene gene= YRO2 |CDS(+,343099,344133) gene= YRO2 note= Yro2p; |gene gene= PRP6 note= synonyms: TSM7269, RNA6 |CDS(-,344600,347299) gene= PRP6 note= Prp6p;	CGGAGGAGCTACTAAAGAAAGAGTGCTGCAATTAATACAATTAATATAAGTGTGGTTATTGAAAATAACTATTCATTTATACGGAGGGTTGGCCGAGTGGTCTAAGGCGGCAGACTTAAGATCTGTTGGACGGTTGTCCGCGCGAGTTCGAACCTCGCATCCTTCAGTAATATTTTTTTAATATACATTTTCTCTGCCATCATGGCTTAAAAAATGCTTAAAAGAAGGGAATTAGGGGGGATGGATGAACTAAGACATAACTTTCTTTTCTTCAATTCGAACTCTGTTGGGAAGAGTTGCTTTAAAAAAGACTCTCTATCCATCTATAAAATTTATTAAAACTTTTGAACTGCACAGAATGATTGGCTCACTTAGAAACAAATTTGAGCATTTCAAAGT…	CGGTGCTGATTTCCACATTACATCTCGTGGTTCAGACTGGCTTTTCACCGTTTTTTGTGTTAACCTACTATTCGGTGTGATTTTAGTCCCACTAATGTTTAGAAAACCAGTTAAGGACAGATTCGTATATTATACGGCCATTGCTCCAAATTTGTTCATGTCAATTGCTTATTTCACCATGGCTTCTAACTTGGGTTGGATCCCAGTCAGAGCAAAGTACAACCATGTACAAACTTCTACCCAAAAGGAGCACCCAGGTTACAGACAAATTTTTTACGCTAGATACGTTGGCTGGTTTTTGGCTTTCCCATGGCCAATTATTCAAATGTCTCTACTTGGTGGTACTCCATTATGGCAAATTGCTTTCAATGTTGGTATGACTGAAATATTTACTGTCTG…
721	716	26	26	0	0	NC_001134	347518	349584	NC_001134	342402	343162	|gene |tRNA note= GO_component: cytosol [goid 0005829] [evidence NAS] |gene |CDS[fcd=-674](+,347877,349382) note= Ybr056wp;	|gene gene= YRO2 |CDS[fcd=317](+,343099,344133) gene= YRO2 note= Yro2p;	CGGAGGAGCTACTAAAGAAAGAGTGCTGCAATTAATACAATTAATATAAGTGTGGTTATTGAAAATAACTATTCATTTATACGGAGGGTTGGCCGAGTGGTCTAAGGCGGCAGACTTAAGATCTGTTGGACGGTTGTCCGCGCGAGTTCGAACCTCGCATCCTTCAGTAATATTTTTTTAATATACATTTTCTCTGCCATCATGGCTTAAAAAATGCTTAAAAGAAGGGAATTAGGGGGGATGGATGAACTAAGACATAACTTTCTTTTCTTCAATTCGAACTCTGTTGGGAAGAGTTGCTTTAAAAAAGACTCTCTATCCATCTATAAAATTTATTAAAACTTTTGAACTGCACAGAATGATTGGCTCACTTAGAAACAAATTTGAGCATTTCAAAGT…	CGGTCCAATGCATGAATCCCTTTAAGAAGCATGAAGAAAAAAAAAAATAGCCTCTTGTAAAAGCAAAAATGCCTTTCACTATTTCTGTGTAAACGAATAATTTCGTCATCTTAGTAGTTCACTGGATAATTGTGCTTTCCAATCAGATTAGTTAGTAAAACCCCTAGAAAATTTCAATGTTAGATCGGGATGATTCCTCATCGGGTTGTTGCTTATTCATGATCCTTTCAATTACTGGAAGCTTACCGAAAAGATATATAAAGAACCGAACTTATTCGGTTTACATGTAAGACAGTGTGTTAGTTATGGTTTTCCGCCCTTTTCTTCTCTTGTTTTCTTCGATATTTGTTATTAACCTTTTCTCATTTACGATTATATAATCAAGTGTCAAGATTGTGT…
721	1190	1	1	0	0	NC_001134	347518	349584	NC_001134	742453	742678	|gene |tRNA note= GO_component: cytosol [goid 0005829] [evidence NAS] |gene |CDS[fcd=-674](+,347877,349382) note= Ybr056wp;	|gene gene= FMP21 |CDS[fcd=6](-,742155,742571) gene= FMP21 note= Fmp21p;	CGGAGGAGCTACTAAAGAAAGAGTGCTGCAATTAATACAATTAATATAAGTGTGGTTATTGAAAATAACTATTCATTTATACGGAGGGTTGGCCGAGTGGTCTAAGGCGGCAGACTTAAGATCTGTTGGACGGTTGTCCGCGCGAGTTCGAACCTCGCATCCTTCAGTAATATTTTTTTAATATACATTTTCTCTGCCATCATGGCTTAAAAAATGCTTAAAAGAAGGGAATTAGGGGGGATGGATGAACTAAGACATAACTTTCTTTTCTTCAATTCGAACTCTGTTGGGAAGAGTTGCTTTAAAAAAGACTCTCTATCCATCTATAAAATTTATTAAAACTTTTGAACTGCACAGAATGATTGGCTCACTTAGAAACAAATTTGAGCATTTCAAAGT…	CGGGGATCCTTTCAGTAGTTATTTTTCGGGTGGCCATATTAAATGGTCGTCCACGTAGTAGATTTAAGGCTCCCGTGCGAGGATACCGATAACCTGTGCTTTTGATGGCGCACAACATTAGTTCTTCTTTTTATTATTTGGTTCTTTCTGACTCTTTAGCAAGTTAATATGATCTGCACTTTCCCCATTGGCCCCTTTATAGGGCGGAAAAGAGCATCTGTTTTT
721	11869	1	1	0	0	NC_001134	347518	349584	NC_001147	250166	250528	|gene |tRNA note= GO_component: cytosol [goid 0005829] [evidence NAS] |gene |CDS[fcd=-674](+,347877,349382) note= Ybr056wp;	|gene gene= NGL1 |CDS[fcd=-523](+,249824,250915) gene= NGL1 note= Ngl1p;	CGGAGGAGCTACTAAAGAAAGAGTGCTGCAATTAATACAATTAATATAAGTGTGGTTATTGAAAATAACTATTCATTTATACGGAGGGTTGGCCGAGTGGTCTAAGGCGGCAGACTTAAGATCTGTTGGACGGTTGTCCGCGCGAGTTCGAACCTCGCATCCTTCAGTAATATTTTTTTAATATACATTTTCTCTGCCATCATGGCTTAAAAAATGCTTAAAAGAAGGGAATTAGGGGGGATGGATGAACTAAGACATAACTTTCTTTTCTTCAATTCGAACTCTGTTGGGAAGAGTTGCTTTAAAAAAGACTCTCTATCCATCTATAAAATTTATTAAAACTTTTGAACTGCACAGAATGATTGGCTCACTTAGAAACAAATTTGAGCATTTCAAAGT…	CGGTTAAAGATATGGACGGTGTATCTATTTTCTATAATCTTGCAAAATTTGACTTTATATCGTCATCAGGGATCTACTTAAACCAGCTACTGAATGTTTTCAATCAAAGGGAACTGAAATACTTATACAATAAGAAGGTAACATTAACCGATGGTGCTTCCAATGTTATTGGTGAAGACAGCTTATTGGATGTTTTAAAAGGCAAGAATCAGGTATGCTTATTCGTATCTCTAAGACATAAGGAGACGGGTACTATTTTTGTCGTTTTAAATACTCATTTGTATTGGAAATATGACGAAGTTAAGCTAACACAATGCATGATTATAATGAGAGAGTTATCAAAGATCATTAAGCAGCTCCTA
721	719	2856	2856	1233	1233	NC_001134	347518	349584	NC_001134	346852	346929	|gene |tRNA note= GO_component: cytosol [goid 0005829] [evidence NAS] |gene |CDS[fcd=-674](+,347877,349382) note= Ybr056wp;	|gene gene= PRP6 note= synonyms: TSM7269, RNA6 |CDS[fcd=409](-,344600,347299) gene= PRP6 note= Prp6p;	CGGAGGAGCTACTAAAGAAAGAGTGCTGCAATTAATACAATTAATATAAGTGTGGTTATTGAAAATAACTATTCATTTATACGGAGGGTTGGCCGAGTGGTCTAAGGCGGCAGACTTAAGATCTGTTGGACGGTTGTCCGCGCGAGTTCGAACCTCGCATCCTTCAGTAATATTTTTTTAATATACATTTTCTCTGCCATCATGGCTTAAAAAATGCTTAAAAGAAGGGAATTAGGGGGGATGGATGAACTAAGACATAACTTTCTTTTCTTCAATTCGAACTCTGTTGGGAAGAGTTGCTTTAAAAAAGACTCTCTATCCATCTATAAAATTTATTAAAACTTTTGAACTGCACAGAATGATTGGCTCACTTAGAAACAAATTTGAGCATTTCAAAGT…	CGGTGCAGCATAAGTTTTTCTGTTTAATTGCTCTTGAATTCTATTTCTCTTGTTTCTTCTTGTAAAATCTGTGGCAT
721	11387	2	2	2	2	NC_001134	347518	349584	NC_001146	623375	625081	|gene |tRNA note= GO_component: cytosol [goid 0005829] [evidence NAS] |gene |CDS[fcd=-674](+,347877,349382) note= Ybr056wp;	|gene gene= HRB1 note= synonym: TOM34 gene= HRB1 note= Hrb1p; |gene gene= PET8 note= synonym: SAM5 |CDS[fcd=1603](-,624977,625831) gene= PET8 note= Pet8p;	CGGAGGAGCTACTAAAGAAAGAGTGCTGCAATTAATACAATTAATATAAGTGTGGTTATTGAAAATAACTATTCATTTATACGGAGGGTTGGCCGAGTGGTCTAAGGCGGCAGACTTAAGATCTGTTGGACGGTTGTCCGCGCGAGTTCGAACCTCGCATCCTTCAGTAATATTTTTTTAATATACATTTTCTCTGCCATCATGGCTTAAAAAATGCTTAAAAGAAGGGAATTAGGGGGGATGGATGAACTAAGACATAACTTTCTTTTCTTCAATTCGAACTCTGTTGGGAAGAGTTGCTTTAAAAAAGACTCTCTATCCATCTATAAAATTTATTAAAACTTTTGAACTGCACAGAATGATTGGCTCACTTAGAAACAAATTTGAGCATTTCAAAGT…	CGGAGGTCAGGTAATTATAACGGTAGGCGTAAGTTCGCAGATACGTACAGAGGAAGCAGAGATAGAGGAGAATATAGAGGAGGTAGAGAAAGGTCTGATTACAGAGAAAGAGAAAGGTTCAATAACAGAGATAATCCTAGATCTAGAGACCGTTACGATGATAGGCGCAGAGGAAGAGATGTGACTGGTCGTTATGGGAACAGACGTGATGACTATCCTAGAAGCTTTAGGAGTAGACACAATACACGTGATGACAGTAGGAGAGGCGGTTTTGGTAGTAGTGGAGCAAGAGGTGATTACGGTCCTTTGTTGGCACGTGAATTGGATAGTACATACGAAGAAAAGGTCAATAGAAACTATTCCAATAGTATATTCGTGGGTAATTTAACATATGACAGC…
721	718	741	741	475	475	NC_001134	347518	349584	NC_001134	346102	346851	|gene |tRNA note= GO_component: cytosol [goid 0005829] [evidence NAS] |gene |CDS[fcd=-674](+,347877,349382) note= Ybr056wp;	|gene gene= PRP6 note= synonyms: TSM7269, RNA6 |CDS[fcd=823](-,344600,347299) gene= PRP6 note= Prp6p;	CGGAGGAGCTACTAAAGAAAGAGTGCTGCAATTAATACAATTAATATAAGTGTGGTTATTGAAAATAACTATTCATTTATACGGAGGGTTGGCCGAGTGGTCTAAGGCGGCAGACTTAAGATCTGTTGGACGGTTGTCCGCGCGAGTTCGAACCTCGCATCCTTCAGTAATATTTTTTTAATATACATTTTCTCTGCCATCATGGCTTAAAAAATGCTTAAAAGAAGGGAATTAGGGGGGATGGATGAACTAAGACATAACTTTCTTTTCTTCAATTCGAACTCTGTTGGGAAGAGTTGCTTTAAAAAAGACTCTCTATCCATCTATAAAATTTATTAAAACTTTTGAACTGCACAGAATGATTGGCTCACTTAGAAACAAATTTGAGCATTTCAAAGT…	CGGTTCTTGCGGAAGGATTTTTCTGAAGGAATTCAAAGTCATTTTAGCATTATGATAGCTTTGCAAATTAGTATATGCAGTCAAGAGATCCATACTTTGTGGAATAAATTGTGTGGCTTTCTCTAACATTTTTATAACTTGCGCTTTGTCAGCTTCAAAACTGACAGCTAGCTTCCATAGGCCCTCATCTCGAGGAATCTCTTGCAGTGCTTTTCTCACTACTCTATATTTGTTAACCGTTGTGCTTTCCAAATCAATAGCTTTGAACCAAAGAAGCGGAGACGTTGGATTAAAATTTATTGCCGTTGCCACTAATGTTTTACAGTAGTGAACATCAGATTCGTGTAGTCTAATGTTTTCTAGCCAAATATCGGAGCTTCGAGGGCACTCTTGGCAACC…
721	7972	29	29	0	0	NC_001134	347518	349584	NC_001143	359335	359714	|gene |tRNA note= GO_component: cytosol [goid 0005829] [evidence NAS] |gene |CDS[fcd=-674](+,347877,349382) note= Ybr056wp;	|neigh_up CDS[fcd=-1405](+,358119,359210) gene= SPC42 note= Spc42p; |neigh_down CDS[fcd=262](+,359786,360460) gene= VPS24 note= Vps24p;	CGGAGGAGCTACTAAAGAAAGAGTGCTGCAATTAATACAATTAATATAAGTGTGGTTATTGAAAATAACTATTCATTTATACGGAGGGTTGGCCGAGTGGTCTAAGGCGGCAGACTTAAGATCTGTTGGACGGTTGTCCGCGCGAGTTCGAACCTCGCATCCTTCAGTAATATTTTTTTAATATACATTTTCTCTGCCATCATGGCTTAAAAAATGCTTAAAAGAAGGGAATTAGGGGGGATGGATGAACTAAGACATAACTTTCTTTTCTTCAATTCGAACTCTGTTGGGAAGAGTTGCTTTAAAAAAGACTCTCTATCCATCTATAAAATTTATTAAAACTTTTGAACTGCACAGAATGATTGGCTCACTTAGAAACAAATTTGAGCATTTCAAAGT…	CGGAAACGTAAAGGCCTTTTATATTAAGTGTTTTCTCATTATAGGATATATAATAAGAATTTGTAATTGTTACTTTTCTTTCAGTTTTCATTAACTACTTTAAACCTTAGAAAATACATTCCAATCCTACGAATAGACGTATAAGTAAGGATTAATGCTATCGGAAAGCAACTTAAATAACTATAAATGGTGGATGGTTAGTGTCATAATATCTTAATGAATATCGCTTTTGACGATATAGTACTAGCAATCTGCGGTTCCAATGGAATGCGTAAACGCATAATAATGAAGTTGGAATAAAAATATGCTATACCAACAACTTTCATCTAAGTAGTCTTTATTTGACATATATATGTATATACACCGAACAATAGATTTA
721	6477	1	1	0	0	NC_001134	347518	349584	NC_001141	199990	200056	|gene |tRNA note= GO_component: cytosol [goid 0005829] [evidence NAS] |gene |CDS[fcd=-674](+,347877,349382) note= Ybr056wp;	|gene gene= LRC2 |CDS[fcd=93](-,199643,200116) gene= LRC2 note= Lrc2p;	CGGAGGAGCTACTAAAGAAAGAGTGCTGCAATTAATACAATTAATATAAGTGTGGTTATTGAAAATAACTATTCATTTATACGGAGGGTTGGCCGAGTGGTCTAAGGCGGCAGACTTAAGATCTGTTGGACGGTTGTCCGCGCGAGTTCGAACCTCGCATCCTTCAGTAATATTTTTTTAATATACATTTTCTCTGCCATCATGGCTTAAAAAATGCTTAAAAGAAGGGAATTAGGGGGGATGGATGAACTAAGACATAACTTTCTTTTCTTCAATTCGAACTCTGTTGGGAAGAGTTGCTTTAAAAAAGACTCTCTATCCATCTATAAAATTTATTAAAACTTTTGAACTGCACAGAATGATTGGCTCACTTAGAAACAAATTTGAGCATTTCAAAGT…	CGGAGTGGATGCTAATAGTGCTGCGTTTGCGAGCGCAGGATAAGGTGTCCTTGTCAATGCATATAG
721	13236	2	2	0	0	NC_001134	347518	349584	NC_001148	379667	379690	|gene |tRNA note= GO_component: cytosol [goid 0005829] [evidence NAS] |gene |CDS[fcd=-674](+,347877,349382) note= Ybr056wp;	|gene gene= RLM1 |CDS[fcd=1469](-,379117,381147) gene= RLM1 note= Rlm1p;	CGGAGGAGCTACTAAAGAAAGAGTGCTGCAATTAATACAATTAATATAAGTGTGGTTATTGAAAATAACTATTCATTTATACGGAGGGTTGGCCGAGTGGTCTAAGGCGGCAGACTTAAGATCTGTTGGACGGTTGTCCGCGCGAGTTCGAACCTCGCATCCTTCAGTAATATTTTTTTAATATACATTTTCTCTGCCATCATGGCTTAAAAAATGCTTAAAAGAAGGGAATTAGGGGGGATGGATGAACTAAGACATAACTTTCTTTTCTTCAATTCGAACTCTGTTGGGAAGAGTTGCTTTAAAAAAGACTCTCTATCCATCTATAAAATTTATTAAAACTTTTGAACTGCACAGAATGATTGGCTCACTTAGAAACAAATTTGAGCATTTCAAAGT…	CGGAAAAAGTTGAAGGGGGGCGT
721	709	2	2	0	0	NC_001134	347518	349584	NC_001134	340640	340681	|gene |tRNA note= GO_component: cytosol [goid 0005829] [evidence NAS] |gene |CDS[fcd=-674](+,347877,349382) note= Ybr056wp;	|gene |CDS[fcd=89](-,339673,340749) note= Ybr053cp;	CGGAGGAGCTACTAAAGAAAGAGTGCTGCAATTAATACAATTAATATAAGTGTGGTTATTGAAAATAACTATTCATTTATACGGAGGGTTGGCCGAGTGGTCTAAGGCGGCAGACTTAAGATCTGTTGGACGGTTGTCCGCGCGAGTTCGAACCTCGCATCCTTCAGTAATATTTTTTTAATATACATTTTCTCTGCCATCATGGCTTAAAAAATGCTTAAAAGAAGGGAATTAGGGGGGATGGATGAACTAAGACATAACTTTCTTTTCTTCAATTCGAACTCTGTTGGGAAGAGTTGCTTTAAAAAAGACTCTCTATCCATCTATAAAATTTATTAAAACTTTTGAACTGCACAGAATGATTGGCTCACTTAGAAACAAATTTGAGCATTTCAAAGT…	CGGTTTCCTTAACGAAGGTTATTCCTTCACTATGTATGGCA
721	711	29	29	0	0	NC_001134	347518	349584	NC_001134	340866	341648	|gene |tRNA note= GO_component: cytosol [goid 0005829] [evidence NAS] |gene |CDS[fcd=-674](+,347877,349382) note= Ybr056wp;	|neigh_up CDS[fcd=-508](-,339673,340749) note= Ybr053cp; |neigh_down CDS[fcd=1842](+,343099,344133) gene= YRO2 note= Yro2p;	CGGAGGAGCTACTAAAGAAAGAGTGCTGCAATTAATACAATTAATATAAGTGTGGTTATTGAAAATAACTATTCATTTATACGGAGGGTTGGCCGAGTGGTCTAAGGCGGCAGACTTAAGATCTGTTGGACGGTTGTCCGCGCGAGTTCGAACCTCGCATCCTTCAGTAATATTTTTTTAATATACATTTTCTCTGCCATCATGGCTTAAAAAATGCTTAAAAGAAGGGAATTAGGGGGGATGGATGAACTAAGACATAACTTTCTTTTCTTCAATTCGAACTCTGTTGGGAAGAGTTGCTTTAAAAAAGACTCTCTATCCATCTATAAAATTTATTAAAACTTTTGAACTGCACAGAATGATTGGCTCACTTAGAAACAAATTTGAGCATTTCAAAGT…	CGGGTAAACTTTCACCTAGCTGTTCTTGGCGACCATTAAATAATTTTGAATGCATTTCTAGGAACAAAATCAAGTGCAAGCTACAGCTTTACAATTATAGAATCTGTTGACCAAGTAAAATGGATGAGAAAATTTACGTACGATTTTGTTCCTTATCCATTCAGCTTCTCAGTTAGTCAAGAGGTAGCTGTAGCGGCTTAACGAAAAAGGTATTAAAAAGGGACATACTTTTTTTATATCTTTTCCTTTGGCGTTCACAGTTACTCTTTTAGAACTCCTTGTTGTTGTGTAATGCATTTACCCATTCCCGATATAACTACCACTTTGGAGAACTGTAGACAAAGACCGCTCTTACTGAGTATACATTTTACTTTCGTAGACCGACTTTTAACTCTATTA…
721	710	1	1	0	0	NC_001134	347518	349584	NC_001134	340682	340865	|gene |tRNA note= GO_component: cytosol [goid 0005829] [evidence NAS] |gene |CDS[fcd=-674](+,347877,349382) note= Ybr056wp;	|gene |CDS[fcd=-24](-,339673,340749) note= Ybr053cp;	CGGAGGAGCTACTAAAGAAAGAGTGCTGCAATTAATACAATTAATATAAGTGTGGTTATTGAAAATAACTATTCATTTATACGGAGGGTTGGCCGAGTGGTCTAAGGCGGCAGACTTAAGATCTGTTGGACGGTTGTCCGCGCGAGTTCGAACCTCGCATCCTTCAGTAATATTTTTTTAATATACATTTTCTCTGCCATCATGGCTTAAAAAATGCTTAAAAGAAGGGAATTAGGGGGGATGGATGAACTAAGACATAACTTTCTTTTCTTCAATTCGAACTCTGTTGGGAAGAGTTGCTTTAAAAAAGACTCTCTATCCATCTATAAAATTTATTAAAACTTTTGAACTGCACAGAATGATTGGCTCACTTAGAAACAAATTTGAGCATTTCAAAGT…	CGGGAACGTGATAATAAGGTTTTAAATCATGCAAAATAATTTCTTCAAAATCGCCAACACTACTCATTTTACGAAAAGTGTCTAGTTGCTCAATGCATATAAACTTAATCTAAGAATCTTACAGGACATCTTCATATATGTCCATATGCTTTGAATAAGCATTGGCTTCCCCTTAAAGCCCGA
721	10758	143	143	0	0	NC_001134	347518	349584	NC_001146	85931	86386	|gene |tRNA note= GO_component: cytosol [goid 0005829] [evidence NAS] |gene |CDS[fcd=-674](+,347877,349382) note= Ybr056wp;	|gene gene= RFC3 |CDS[fcd=60](+,86218,87240) gene= RFC3 note= Rfc3p;	CGGAGGAGCTACTAAAGAAAGAGTGCTGCAATTAATACAATTAATATAAGTGTGGTTATTGAAAATAACTATTCATTTATACGGAGGGTTGGCCGAGTGGTCTAAGGCGGCAGACTTAAGATCTGTTGGACGGTTGTCCGCGCGAGTTCGAACCTCGCATCCTTCAGTAATATTTTTTTAATATACATTTTCTCTGCCATCATGGCTTAAAAAATGCTTAAAAGAAGGGAATTAGGGGGGATGGATGAACTAAGACATAACTTTCTTTTCTTCAATTCGAACTCTGTTGGGAAGAGTTGCTTTAAAAAAGACTCTCTATCCATCTATAAAATTTATTAAAACTTTTGAACTGCACAGAATGATTGGCTCACTTAGAAACAAATTTGAGCATTTCAAAGT…	CGGTCGAAATTATTAGGGAAATTTTCCGCAACCAATGGCTCAGTTTCAGTAACCTGTTCTTGAGAAAACAACACGTTTACTTGTAGAGTTACTATTGCGGTCCGATGGCAGCGAAACTATATCATTATTATATTATGTATGGCTTCTCAATTTTGATCTTTTTTTTTTTTGGTCAGTACGCGATTTTGAAAGAAATGGAAAGAAGCTATAAAGAGCACAGGATAAATATCTTTTCAAAGCTTGAATAATTTTATAAAAGGTGTAGGAACAGGCCCGACATACAAGAATGTCGACAAGTACAGAGAAGAGGAGCAAAGAAAACCTTCCATGGGTTGAAAAATACAGACCCGAAACGTTGGACGAAGTGTACGGACAAAATGAGGTGATCACCACAGTTCG…
721	728	3	3	0	0	NC_001134	347518	349584	NC_001134	354181	354919	|gene |tRNA note= GO_component: cytosol [goid 0005829] [evidence NAS] |gene |CDS[fcd=-674](+,347877,349382) note= Ybr056wp;	|gene gene= UBP14 note= synonym: GID6 |CDS[fcd=1465](-,353670,356015) gene= UBP14 note= Ubp14p;	CGGAGGAGCTACTAAAGAAAGAGTGCTGCAATTAATACAATTAATATAAGTGTGGTTATTGAAAATAACTATTCATTTATACGGAGGGTTGGCCGAGTGGTCTAAGGCGGCAGACTTAAGATCTGTTGGACGGTTGTCCGCGCGAGTTCGAACCTCGCATCCTTCAGTAATATTTTTTTAATATACATTTTCTCTGCCATCATGGCTTAAAAAATGCTTAAAAGAAGGGAATTAGGGGGGATGGATGAACTAAGACATAACTTTCTTTTCTTCAATTCGAACTCTGTTGGGAAGAGTTGCTTTAAAAAAGACTCTCTATCCATCTATAAAATTTATTAAAACTTTTGAACTGCACAGAATGATTGGCTCACTTAGAAACAAATTTGAGCATTTCAAAGT…	CGGTGTTAAATAGGGCGCGCACGCTAGCATTTTGAGTAAAGCCCATTTCAATTAATTGAGAAATACTGCATTGGTTTGGCGTAAAAGAGCTACGGTTTTCGTCCTCATCAGGCAATAAGTTTTCAGTTTGAGGATCAAATCCTTGTGATAAATAAGACGAAACATCTAGCATATCATCCCTGTCTATTAAACCTGGTAAAGAAAGCTCATTACTTGTCTTAACAGGAATCCAGTTCTGTAATCTAATCCTTATTGGGTTCAAAATAAGTGTTTGAGGAAGAGATTTGAAACCAGGTTTTTTATTTGCGGTAACCTTTTCCTTACAATTAGCACATTTAAATTCAATCGTCTGCCCTTCAAAATACGCCTTGATTCTCTCTAACATATCTTGAGGTTCAT…
721	730	40	40	0	0	NC_001134	347518	349584	NC_001134	356600	357062	|gene |tRNA note= GO_component: cytosol [goid 0005829] [evidence NAS] |gene |CDS[fcd=-674](+,347877,349382) note= Ybr056wp;	|gene gene= AKL1 |CDS[fcd=3354](-,356859,360185) gene= AKL1 note= Akl1p;	CGGAGGAGCTACTAAAGAAAGAGTGCTGCAATTAATACAATTAATATAAGTGTGGTTATTGAAAATAACTATTCATTTATACGGAGGGTTGGCCGAGTGGTCTAAGGCGGCAGACTTAAGATCTGTTGGACGGTTGTCCGCGCGAGTTCGAACCTCGCATCCTTCAGTAATATTTTTTTAATATACATTTTCTCTGCCATCATGGCTTAAAAAATGCTTAAAAGAAGGGAATTAGGGGGGATGGATGAACTAAGACATAACTTTCTTTTCTTCAATTCGAACTCTGTTGGGAAGAGTTGCTTTAAAAAAGACTCTCTATCCATCTATAAAATTTATTAAAACTTTTGAACTGCACAGAATGATTGGCTCACTTAGAAACAAATTTGAGCATTTCAAAGT…	CGGTTTCTACACTCTTTATCTCTAGTACTTTTAAAATGGTGTCATTTCTGTCAAATTGCGAGCACTATTACTCTTCACTTAACCGCTTCTCGTTAAGCGCGTCAGGAGTAAACGTCATCTCGCACGATATGCTTAATGCATATGATTTGAGTTACTATTGTTCTATCAATTTAGTTTTTGAGGAAGATATACGGATTGTCTGCGCCTCTATATGTAACAATGTATGTATATGATTTTATATGTGCTCTATTTATCGAATCATTTCTCGCTTCTAAAGACTGAGAAAAAAGATCTCCTTTTCCCGTTACTGCCACCACTACTGGATGCACTACTTGCCATCGCTTCACGACGGACCCTTTCCAAATCAAGCGATTGACGGGCCCTAGCGAAGGATTTTCT…
721	731	43	43	0	0	NC_001134	347518	349584	NC_001134	357063	357128	|gene |tRNA note= GO_component: cytosol [goid 0005829] [evidence NAS] |gene |CDS[fcd=-674](+,347877,349382) note= Ybr056wp;	|gene gene= AKL1 |CDS[fcd=3090](-,356859,360185) gene= AKL1 note= Akl1p;	CGGAGGAGCTACTAAAGAAAGAGTGCTGCAATTAATACAATTAATATAAGTGTGGTTATTGAAAATAACTATTCATTTATACGGAGGGTTGGCCGAGTGGTCTAAGGCGGCAGACTTAAGATCTGTTGGACGGTTGTCCGCGCGAGTTCGAACCTCGCATCCTTCAGTAATATTTTTTTAATATACATTTTCTCTGCCATCATGGCTTAAAAAATGCTTAAAAGAAGGGAATTAGGGGGGATGGATGAACTAAGACATAACTTTCTTTTCTTCAATTCGAACTCTGTTGGGAAGAGTTGCTTTAAAAAAGACTCTCTATCCATCTATAAAATTTATTAAAACTTTTGAACTGCACAGAATGATTGGCTCACTTAGAAACAAATTTGAGCATTTCAAAGT…	CGGTATCTTTCCAAATCGTGCCTTTGCTTGGAACCAGTCCTGTGTGTTTCATGCTTGCCATTTGA
721	3599	3	3	0	0	NC_001134	347518	349584	NC_001137	205833	206261	|gene |tRNA note= GO_component: cytosol [goid 0005829] [evidence NAS] |gene |CDS[fcd=-674](+,347877,349382) note= Ybr056wp;	|gene gene= GCD11 note= synonym: SUI4 |CDS[fcd=-797](+,205250,206833) gene= GCD11 note= Gcd11p;	CGGAGGAGCTACTAAAGAAAGAGTGCTGCAATTAATACAATTAATATAAGTGTGGTTATTGAAAATAACTATTCATTTATACGGAGGGTTGGCCGAGTGGTCTAAGGCGGCAGACTTAAGATCTGTTGGACGGTTGTCCGCGCGAGTTCGAACCTCGCATCCTTCAGTAATATTTTTTTAATATACATTTTCTCTGCCATCATGGCTTAAAAAATGCTTAAAAGAAGGGAATTAGGGGGGATGGATGAACTAAGACATAACTTTCTTTTCTTCAATTCGAACTCTGTTGGGAAGAGTTGCTTTAAAAAAGACTCTCTATCCATCTATAAAATTTATTAAAACTTTTGAACTGCACAGAATGATTGGCTCACTTAGAAACAAATTTGAGCATTTCAAAGT…	CGGTCACGATATCTTAATGAGTACTATGTTATCAGGTGCTGCTGTTATGGATGCTGCGTTACTGTTGATTGCAGGTAATGAATCTTGTCCACAACCTCAAACCTCAGAGCATTTAGCTGCCATTGAAATCATGAAATTAAAGCACGTCATCATCTTACAGAATAAGGTCGATTTAATGCGTGAAGAAAGTGCCTTAGAACACCAAAAATCCATCTTGAAGTTCATCAGAGGTACCATTGCTGACGGTGCTCCTATTGTACCAATATCCGCTCAGTTGAAGTATAACATCGACGCAGTTAATGAATTTATTGTCAAGACTATTCCCGTACCACCAAGAGATTTTATGATTTCTCCAAGGTTAATTGTTATTCGTTCATTTGATGTTAATAAGCCAGGTGC…
721	732	1	1	0	0	NC_001134	347518	349584	NC_001134	357129	357705	|gene |tRNA note= GO_component: cytosol [goid 0005829] [evidence NAS] |gene |CDS[fcd=-674](+,347877,349382) note= Ybr056wp;	|gene gene= AKL1 |CDS[fcd=2768](-,356859,360185) gene= AKL1 note= Akl1p;	CGGAGGAGCTACTAAAGAAAGAGTGCTGCAATTAATACAATTAATATAAGTGTGGTTATTGAAAATAACTATTCATTTATACGGAGGGTTGGCCGAGTGGTCTAAGGCGGCAGACTTAAGATCTGTTGGACGGTTGTCCGCGCGAGTTCGAACCTCGCATCCTTCAGTAATATTTTTTTAATATACATTTTCTCTGCCATCATGGCTTAAAAAATGCTTAAAAGAAGGGAATTAGGGGGGATGGATGAACTAAGACATAACTTTCTTTTCTTCAATTCGAACTCTGTTGGGAAGAGTTGCTTTAAAAAAGACTCTCTATCCATCTATAAAATTTATTAAAACTTTTGAACTGCACAGAATGATTGGCTCACTTAGAAACAAATTTGAGCATTTCAAAGT…	CGGGTTGACAGTTCGTGACCAGTACTGTGGCGCTTATTCTCAGTTATTGCGGTGGAAGCATGAGGTGAAACTCTATACGAGTGATGTGAATTTGGTGCTGGCGAGTCGTTTTTATTTCTATGCTCTTGAGTTAACGTTGGTGAAGACAGATTTACTTCCTGGAAATTCAGATCCAATGACTGCCGCGGTTGCCTTGTTGATACGCTGCTGAAGTCCTTGCTTTTGAATTGATTAGACTTACTAGCATCACTTGATCTTGCCTGGTCTTTATGACCTCTTTCATTATGGAGTGGTCTTCTTTCAGCTGTTTTTCCTCTCCTTGCATCATCCAAATCAATATCAATGCTTTCGCTGGAGACCATACTATCTCCCAATTCGTCTGTTGAATAATTGTTCCTC…
721	7995	299	299	7	7	NC_001134	347518	349584	NC_001143	379865	379972	|gene |tRNA note= GO_component: cytosol [goid 0005829] [evidence NAS] |gene |CDS[fcd=-674](+,347877,349382) note= Ybr056wp;	|gene gene= IXR1 note= synonym: ORD1 |CDS[fcd=1583](-,379708,381501) gene= IXR1 note= Ixr1p;	CGGAGGAGCTACTAAAGAAAGAGTGCTGCAATTAATACAATTAATATAAGTGTGGTTATTGAAAATAACTATTCATTTATACGGAGGGTTGGCCGAGTGGTCTAAGGCGGCAGACTTAAGATCTGTTGGACGGTTGTCCGCGCGAGTTCGAACCTCGCATCCTTCAGTAATATTTTTTTAATATACATTTTCTCTGCCATCATGGCTTAAAAAATGCTTAAAAGAAGGGAATTAGGGGGGATGGATGAACTAAGACATAACTTTCTTTTCTTCAATTCGAACTCTGTTGGGAAGAGTTGCTTTAAAAAAGACTCTCTATCCATCTATAAAATTTATTAAAACTTTTGAACTGCACAGAATGATTGGCTCACTTAGAAACAAATTTGAGCATTTCAAAGT…	CGGTAACTGAGTCGATGGCATTTGCGGTTATGTGCTCGATACTGTCTTGGTTCTCCATGATTTTAGTGTCCATATTCAAATTCATGTTCATGGCCTTATGTGAGTGA
721	720	16814	16814	6291	6291	NC_001134	347518	349584	NC_001134	346930	347517	|gene |tRNA note= GO_component: cytosol [goid 0005829] [evidence NAS] |gene |CDS[fcd=-674](+,347877,349382) note= Ybr056wp;	|gene gene= PRP6 note= synonyms: TSM7269, RNA6 |CDS[fcd=76](-,344600,347299) gene= PRP6 note= Prp6p;	CGGAGGAGCTACTAAAGAAAGAGTGCTGCAATTAATACAATTAATATAAGTGTGGTTATTGAAAATAACTATTCATTTATACGGAGGGTTGGCCGAGTGGTCTAAGGCGGCAGACTTAAGATCTGTTGGACGGTTGTCCGCGCGAGTTCGAACCTCGCATCCTTCAGTAATATTTTTTTAATATACATTTTCTCTGCCATCATGGCTTAAAAAATGCTTAAAAGAAGGGAATTAGGGGGGATGGATGAACTAAGACATAACTTTCTTTTCTTCAATTCGAACTCTGTTGGGAAGAGTTGCTTTAAAAAAGACTCTCTATCCATCTATAAAATTTATTAAAACTTTTGAACTGCACAGAATGATTGGCTCACTTAGAAACAAATTTGAGCATTTCAAAGT…	CGGAATATCCATCCACTCACTCTCCGTTACAGCAGCTAATGATTCTTTCAAATCGGCAAATTGCCGTTTCACGTTTGAAGAATCAACTGAATTGTCATCATCCTTTTCATTAGCTCTTTTCTTTTTCTTTTGTGCTAATTTCAATTCAAGCGTTTTGAATACATTTGCAGCTTCATCATCTTCATCATCTTTCGGTTGGCTTTGAAGATGGTTGTTCAAATTTTCACGGTACCTTTTCGGTATTCTTCTTCCTTTGTCATCATTACTAACCACTTGCTTTTCTTTTGTTGAAAATCCAGTGGCTCCACGACCAATACCTGGTACGTAACCTGCAGGTGGTTCTTGATCCAAAAAAGATGGCCTCTCCATAAAATGTGACGTTTTCTTGCTGTTAAACTC…
721	721	54811	54811	39892	39892	NC_001134	347518	349584	NC_001134	347518	349584	|gene |tRNA note= GO_component: cytosol [goid 0005829] [evidence NAS] |gene |CDS[fcd=-674](+,347877,349382) note= Ybr056wp;	|gene |tRNA note= GO_component: cytosol [goid 0005829] [evidence NAS] |gene |CDS[fcd=-674](+,347877,349382) note= Ybr056wp;	CGGAGGAGCTACTAAAGAAAGAGTGCTGCAATTAATACAATTAATATAAGTGTGGTTATTGAAAATAACTATTCATTTATACGGAGGGTTGGCCGAGTGGTCTAAGGCGGCAGACTTAAGATCTGTTGGACGGTTGTCCGCGCGAGTTCGAACCTCGCATCCTTCAGTAATATTTTTTTAATATACATTTTCTCTGCCATCATGGCTTAAAAAATGCTTAAAAGAAGGGAATTAGGGGGGATGGATGAACTAAGACATAACTTTCTTTTCTTCAATTCGAACTCTGTTGGGAAGAGTTGCTTTAAAAAAGACTCTCTATCCATCTATAAAATTTATTAAAACTTTTGAACTGCACAGAATGATTGGCTCACTTAGAAACAAATTTGAGCATTTCAAAGT…	CGGAGGAGCTACTAAAGAAAGAGTGCTGCAATTAATACAATTAATATAAGTGTGGTTATTGAAAATAACTATTCATTTATACGGAGGGTTGGCCGAGTGGTCTAAGGCGGCAGACTTAAGATCTGTTGGACGGTTGTCCGCGCGAGTTCGAACCTCGCATCCTTCAGTAATATTTTTTTAATATACATTTTCTCTGCCATCATGGCTTAAAAAATGCTTAAAAGAAGGGAATTAGGGGGGATGGATGAACTAAGACATAACTTTCTTTTCTTCAATTCGAACTCTGTTGGGAAGAGTTGCTTTAAAAAAGACTCTCTATCCATCTATAAAATTTATTAAAACTTTTGAACTGCACAGAATGATTGGCTCACTTAGAAACAAATTTGAGCATTTCAAAGT…
721	722	1014	1210	1064	1070	NC_001134	347518	349584	NC_001134	349585	350862	|gene |tRNA note= GO_component: cytosol [goid 0005829] [evidence NAS] |gene |CDS[fcd=-674](+,347877,349382) note= Ybr056wp;	|LTR note= YBRWDELTA17 |gene |tRNA note= GO_component: cytosol [goid 0005829] [evidence NAS] |neigh_up CDS[fcd=-2346](+,347877,349382) note= Ybr056wp; |neigh_down CDS[fcd=3068](-,352191,353291) gene= MUM2 note= Mum2p;	CGGAGGAGCTACTAAAGAAAGAGTGCTGCAATTAATACAATTAATATAAGTGTGGTTATTGAAAATAACTATTCATTTATACGGAGGGTTGGCCGAGTGGTCTAAGGCGGCAGACTTAAGATCTGTTGGACGGTTGTCCGCGCGAGTTCGAACCTCGCATCCTTCAGTAATATTTTTTTAATATACATTTTCTCTGCCATCATGGCTTAAAAAATGCTTAAAAGAAGGGAATTAGGGGGGATGGATGAACTAAGACATAACTTTCTTTTCTTCAATTCGAACTCTGTTGGGAAGAGTTGCTTTAAAAAAGACTCTCTATCCATCTATAAAATTTATTAAAACTTTTGAACTGCACAGAATGATTGGCTCACTTAGAAACAAATTTGAGCATTTCAAAGT…	CGGAATAATGGTAATCAAGATGAAGCGCTATGATATTTTTAGTATTTGCCATCTTCAAATCATTCTATTTTACCCAATAGAACATTCAAGTAAGGTGAACTATTTAAATTAAAAACTCAAGTAACATGGGCGATCTTTAAGCATTTGAGAGTTATTAAAAATTTCCGAATAGAGCAATAATGGAGGAAATTAAGTAAAAACTTTGAGCCAAAATAAATAATATTACAAAGCAAGCCAGAGTCTCTTTTTAATCAGAGGAAAGATGAGTTGATAAGCGTATAAGCTACTCTGCTGTGAATGTTTGAATCAACCTCCCAAAAGATGTATTGGAGGTATTAAGCTGCCTTGAAGTTGGGATTTGGCAGGGTTATAAAAAAGGCGTCATTGGCTAAACATGCA…
721	7035	1	1	0	0	NC_001134	347518	349584	NC_001142	278805	278860	|gene |tRNA note= GO_component: cytosol [goid 0005829] [evidence NAS] |gene |CDS[fcd=-674](+,347877,349382) note= Ybr056wp;	|gene gene= TAX4 |CDS[fcd=4](+,278836,280650) gene= TAX4 note= Tax4p;	CGGAGGAGCTACTAAAGAAAGAGTGCTGCAATTAATACAATTAATATAAGTGTGGTTATTGAAAATAACTATTCATTTATACGGAGGGTTGGCCGAGTGGTCTAAGGCGGCAGACTTAAGATCTGTTGGACGGTTGTCCGCGCGAGTTCGAACCTCGCATCCTTCAGTAATATTTTTTTAATATACATTTTCTCTGCCATCATGGCTTAAAAAATGCTTAAAAGAAGGGAATTAGGGGGGATGGATGAACTAAGACATAACTTTCTTTTCTTCAATTCGAACTCTGTTGGGAAGAGTTGCTTTAAAAAAGACTCTCTATCCATCTATAAAATTTATTAAAACTTTTGAACTGCACAGAATGATTGGCTCACTTAGAAACAAATTTGAGCATTTCAAAGT…	CGGAGAATACACGCCCTGACGTTTGTATAAATGCATTTCCCCAAAAAAAAGCATT
721	7036	1	1	0	0	NC_001134	347518	349584	NC_001142	278861	278962	|gene |tRNA note= GO_component: cytosol [goid 0005829] [evidence NAS] |gene |CDS[fcd=-674](+,347877,349382) note= Ybr056wp;	|gene gene= TAX4 |CDS[fcd=-75](+,278836,280650) gene= TAX4 note= Tax4p;	CGGAGGAGCTACTAAAGAAAGAGTGCTGCAATTAATACAATTAATATAAGTGTGGTTATTGAAAATAACTATTCATTTATACGGAGGGTTGGCCGAGTGGTCTAAGGCGGCAGACTTAAGATCTGTTGGACGGTTGTCCGCGCGAGTTCGAACCTCGCATCCTTCAGTAATATTTTTTTAATATACATTTTCTCTGCCATCATGGCTTAAAAAATGCTTAAAAGAAGGGAATTAGGGGGGATGGATGAACTAAGACATAACTTTCTTTTCTTCAATTCGAACTCTGTTGGGAAGAGTTGCTTTAAAAAAGACTCTCTATCCATCTATAAAATTTATTAAAACTTTTGAACTGCACAGAATGATTGGCTCACTTAGAAACAAATTTGAGCATTTCAAAGT…	CGGAAATCTCTCCGTGGTGGAATTGCCGAAGGAAGCTCTCCAAGATTCTTTAACTGCTGCTCAGATTACTTTCAAGAGATATGCCCACCCCAATGGCAATG
721	725	342	342	6	6	NC_001134	347518	349584	NC_001134	350884	351536	|gene |tRNA note= GO_component: cytosol [goid 0005829] [evidence NAS] |gene |CDS[fcd=-674](+,347877,349382) note= Ybr056wp;	|gene |tRNA note= GO_component: cytosol [goid 0005829] [evidence NAS] |neigh_up CDS[fcd=-3333](+,347877,349382) note= Ybr056wp; |neigh_down CDS[fcd=2081](-,352191,353291) gene= MUM2 note= Mum2p;	CGGAGGAGCTACTAAAGAAAGAGTGCTGCAATTAATACAATTAATATAAGTGTGGTTATTGAAAATAACTATTCATTTATACGGAGGGTTGGCCGAGTGGTCTAAGGCGGCAGACTTAAGATCTGTTGGACGGTTGTCCGCGCGAGTTCGAACCTCGCATCCTTCAGTAATATTTTTTTAATATACATTTTCTCTGCCATCATGGCTTAAAAAATGCTTAAAAGAAGGGAATTAGGGGGGATGGATGAACTAAGACATAACTTTCTTTTCTTCAATTCGAACTCTGTTGGGAAGAGTTGCTTTAAAAAAGACTCTCTATCCATCTATAAAATTTATTAAAACTTTTGAACTGCACAGAATGATTGGCTCACTTAGAAACAAATTTGAGCATTTCAAAGT…	CGGGTAAGACCTTATTTTTATATATTTTTTCATGAATTATCGGACACTCTTAGAATGGAGATCTCGCAGATATGGGGCTGAGCCGTGCTGCATCAGTTAAGAAAGAAATAAGCCACCTCGATGCTGTGGTGAATAATTTACGGGAAATTTCTTGGCGTTTCTGTAAGTGACATGATCCGTTATAGTGCCGCAAAGCCAAAAATGTCTTATTTTTAGGTTAGCATCTTTTCAGCCTCGAAAAATGCTTGTTCAGCAATAATATATAAAAGTATCAGTAAAACAACACTTTTTGTTAGATGAACAATTGATTTTGTCTAGGTCCTTGTACTTTGAGAAATATCATCAAAAAAAAAAAGTGCGACATCACAATGAGACATCAATACTATCAACCACAACCGA…
721	13836	1	1	0	0	NC_001134	347518	349584	NC_001148	930860	931199	|gene |tRNA note= GO_component: cytosol [goid 0005829] [evidence NAS] |gene |CDS[fcd=-674](+,347877,349382) note= Ybr056wp;	|neigh_up CDS[fcd=-4096](-,924300,926933) gene= OPT2 note= Opt2p; |neigh_down CDS[fcd=343](+,931372,932784) note= Ypr196wp;	CGGAGGAGCTACTAAAGAAAGAGTGCTGCAATTAATACAATTAATATAAGTGTGGTTATTGAAAATAACTATTCATTTATACGGAGGGTTGGCCGAGTGGTCTAAGGCGGCAGACTTAAGATCTGTTGGACGGTTGTCCGCGCGAGTTCGAACCTCGCATCCTTCAGTAATATTTTTTTAATATACATTTTCTCTGCCATCATGGCTTAAAAAATGCTTAAAAGAAGGGAATTAGGGGGGATGGATGAACTAAGACATAACTTTCTTTTCTTCAATTCGAACTCTGTTGGGAAGAGTTGCTTTAAAAAAGACTCTCTATCCATCTATAAAATTTATTAAAACTTTTGAACTGCACAGAATGATTGGCTCACTTAGAAACAAATTTGAGCATTTCAAAGT…	CGGCTTATGCAAAGTATAAGTTAATCCCTGCCTAGTTTTTTTCTCACCGTTTTTCGTAGTTTAAATCTGCAATGCAGATTTAAAGTTTTTCTTTTCTCTAGCAGCACTCGTGGAAGTAAAAGATTTTTTCTTTCAAATTGCCTACACCGAAGGATGTGAACGATTGCCTTCTTGAACTCAAACTATGGAAGTCTTCGTATGATTTTAGATGATTTGTTTTGGCTAATATCAAAGTATCCACGTATATCCCCATGACACCGCGATACATACTTGCGATGCGGCAATTAAAAGTCGTCATTGTATTGTTCACACTTAAAAGGTTCAAACCTGCAATATCGT
721	4136	2	2	0	0	NC_001134	347518	349584	NC_001138	95297	95328	|gene |tRNA note= GO_component: cytosol [goid 0005829] [evidence NAS] |gene |CDS[fcd=-674](+,347877,349382) note= Ybr056wp;	|neigh_up CDS[fcd=-304](-,93497,95008) gene= FRS2 note= Frs2p; |neigh_down CDS[fcd=652](+,95964,97496) gene= GAT1 note= Gat1p;	CGGAGGAGCTACTAAAGAAAGAGTGCTGCAATTAATACAATTAATATAAGTGTGGTTATTGAAAATAACTATTCATTTATACGGAGGGTTGGCCGAGTGGTCTAAGGCGGCAGACTTAAGATCTGTTGGACGGTTGTCCGCGCGAGTTCGAACCTCGCATCCTTCAGTAATATTTTTTTAATATACATTTTCTCTGCCATCATGGCTTAAAAAATGCTTAAAAGAAGGGAATTAGGGGGGATGGATGAACTAAGACATAACTTTCTTTTCTTCAATTCGAACTCTGTTGGGAAGAGTTGCTTTAAAAAAGACTCTCTATCCATCTATAAAATTTATTAAAACTTTTGAACTGCACAGAATGATTGGCTCACTTAGAAACAAATTTGAGCATTTCAAAGT…	CGGGTAAACCCCTGATAAAACGATACCAAAG
721	13348	1	1	0	0	NC_001134	347518	349584	NC_001148	478055	478334	|gene |tRNA note= GO_component: cytosol [goid 0005829] [evidence NAS] |gene |CDS[fcd=-674](+,347877,349382) note= Ybr056wp;	|gene gene= ISM1 |CDS[fcd=804](-,475990,478998) gene= ISM1 note= Ism1p;	CGGAGGAGCTACTAAAGAAAGAGTGCTGCAATTAATACAATTAATATAAGTGTGGTTATTGAAAATAACTATTCATTTATACGGAGGGTTGGCCGAGTGGTCTAAGGCGGCAGACTTAAGATCTGTTGGACGGTTGTCCGCGCGAGTTCGAACCTCGCATCCTTCAGTAATATTTTTTTAATATACATTTTCTCTGCCATCATGGCTTAAAAAATGCTTAAAAGAAGGGAATTAGGGGGGATGGATGAACTAAGACATAACTTTCTTTTCTTCAATTCGAACTCTGTTGGGAAGAGTTGCTTTAAAAAAGACTCTCTATCCATCTATAAAATTTATTAAAACTTTTGAACTGCACAGAATGATTGGCTCACTTAGAAACAAATTTGAGCATTTCAAAGT…	CGGTCTCTACAAGGATAAGTTCACTATTTAAGCGTAATAGGGAGTAGGAAAAATCCTGATTGAAACAGATTGCTCGATTAGAGAGAAGAGTCCATGGAGTACTGGTCCAAATCAAACAGTATATAGGCAAGTTATTCGTTATTCCTAGTTTTTTGCACAGATCCATCTGGGATTTCTTTTCAAGAGGAAATTTAACATAAGCAGCGATGGATTTATGGTTTTCATTATATTCTAATTCGCCCTCTGCTAACGCTGTTCTAGTTTCTGTACCCCAGTAAA
721	4082	1669	1669	0	0	NC_001134	347518	349584	NC_001138	53486	53569	|gene |tRNA note= GO_component: cytosol [goid 0005829] [evidence NAS] |gene |CDS[fcd=-674](+,347877,349382) note= Ybr056wp;	|gene gene= ACT1 note= synonyms: ABY1, END7 gene= ACT1 note= Act1p; |neigh_up CDS[fcd=-2177](+,51350,52972) note= Yfl040wp; |neigh_down CDS[fcd=2458](-,55365,55985) gene= YPT1 note= Ypt1p;	CGGAGGAGCTACTAAAGAAAGAGTGCTGCAATTAATACAATTAATATAAGTGTGGTTATTGAAAATAACTATTCATTTATACGGAGGGTTGGCCGAGTGGTCTAAGGCGGCAGACTTAAGATCTGTTGGACGGTTGTCCGCGCGAGTTCGAACCTCGCATCCTTCAGTAATATTTTTTTAATATACATTTTCTCTGCCATCATGGCTTAAAAAATGCTTAAAAGAAGGGAATTAGGGGGGATGGATGAACTAAGACATAACTTTCTTTTCTTCAATTCGAACTCTGTTGGGAAGAGTTGCTTTAAAAAAGACTCTCTATCCATCTATAAAATTTATTAAAACTTTTGAACTGCACAGAATGATTGGCTCACTTAGAAACAAATTTGAGCATTTCAAAGT…	CGGACATAACGATGTTACCGTATAATTCCTTACGGACATCGACATCACACTTCATGATGGAGTTGTAAGTAGTTTGGTCAATA
721	4083	564	564	0	0	NC_001134	347518	349584	NC_001138	53570	53842	|gene |tRNA note= GO_component: cytosol [goid 0005829] [evidence NAS] |gene |CDS[fcd=-674](+,347877,349382) note= Ybr056wp;	|gene gene= ACT1 note= synonyms: ABY1, END7 gene= ACT1 note= Act1p; |neigh_up CDS[fcd=-2356](+,51350,52972) note= Yfl040wp; |neigh_down CDS[fcd=2279](-,55365,55985) gene= YPT1 note= Ypt1p;	CGGAGGAGCTACTAAAGAAAGAGTGCTGCAATTAATACAATTAATATAAGTGTGGTTATTGAAAATAACTATTCATTTATACGGAGGGTTGGCCGAGTGGTCTAAGGCGGCAGACTTAAGATCTGTTGGACGGTTGTCCGCGCGAGTTCGAACCTCGCATCCTTCAGTAATATTTTTTTAATATACATTTTCTCTGCCATCATGGCTTAAAAAATGCTTAAAAGAAGGGAATTAGGGGGGATGGATGAACTAAGACATAACTTTCTTTTCTTCAATTCGAACTCTGTTGGGAAGAGTTGCTTTAAAAAAGACTCTCTATCCATCTATAAAATTTATTAAAACTTTTGAACTGCACAGAATGATTGGCTCACTTAGAAACAAATTTGAGCATTTCAAAGT…	CGGCAGATTCCAAACCCAAAACAGAAGGATGGAACAAAGCTTCTGGGGCTCTGAATCTTTCGTTACCAATAGTGATGACTTGACCATCTGGAAGTTCGTAGGATTTTTCAATTGAAGAAGATTGAGCAGCGGTTTGCATTTCTTGTTCGAAGTCCAAGGCGACGTAACATAGTTTTTCCTTGATGTCACGGACAATTTCTCTTTCAGCAGTGGTGGAGAAAGAGTAACCACGTTCACTCAAGATCTTCATCAAGTAGTCAGTCAAATCTCTA
721	803	6	6	0	0	NC_001134	347518	349584	NC_001134	412957	413313	|gene |tRNA note= GO_component: cytosol [goid 0005829] [evidence NAS] |gene |CDS[fcd=-674](+,347877,349382) note= Ybr056wp;	|gene gene= MIS1 |CDS[fcd=-2087](+,411048,413975) gene= MIS1 note= Mis1p;	CGGAGGAGCTACTAAAGAAAGAGTGCTGCAATTAATACAATTAATATAAGTGTGGTTATTGAAAATAACTATTCATTTATACGGAGGGTTGGCCGAGTGGTCTAAGGCGGCAGACTTAAGATCTGTTGGACGGTTGTCCGCGCGAGTTCGAACCTCGCATCCTTCAGTAATATTTTTTTAATATACATTTTCTCTGCCATCATGGCTTAAAAAATGCTTAAAAGAAGGGAATTAGGGGGGATGGATGAACTAAGACATAACTTTCTTTTCTTCAATTCGAACTCTGTTGGGAAGAGTTGCTTTAAAAAAGACTCTCTATCCATCTATAAAATTTATTAAAACTTTTGAACTGCACAGAATGATTGGCTCACTTAGAAACAAATTTGAGCATTTCAAAGT…	CGGTGCTCTGACTGCATTATTACGTGACGCTATAAAGCCTAACTTAATGCAAACTTTGGAAGGGACCCCCGTAATGGTTCACGCTGGTCCTTTCGCCAACATCTCCATCGGCGCATCATCAGTAATTGCAGACTTAATGGCATTGAAGCTTGTTGGTTCAGAAAAGAACCCGTTAAATGACAAGAACATCCATGAACCTGGTTATGTAGTTACTGAAGCAGGATTCGATTTTGCCATGGGTGGTGAAAGATTCTTTGATATCAAATGTCGTTCCTCTGGATTGGTGCCAGATGCAGTTGTCTTAGTCGCAACCGTAAGAGCTTTGAAATCTCATGGAGGTGCTCCAAATGTTAAGC
721	12223	44	44	0	0	NC_001134	347518	349584	NC_001147	552357	552638	|gene |tRNA note= GO_component: cytosol [goid 0005829] [evidence NAS] |gene |CDS[fcd=-674](+,347877,349382) note= Ybr056wp;	|gene gene= PFY1 note= synonym: PRF1 gene= PFY1 note= Pfy1p; |neigh_up CDS[fcd=-1382](+,551115,552053) gene= GCY1 note= Gcy1p; |neigh_down CDS[fcd=2074](-,553177,554571) gene= LEO1 note= Leo1p;	CGGAGGAGCTACTAAAGAAAGAGTGCTGCAATTAATACAATTAATATAAGTGTGGTTATTGAAAATAACTATTCATTTATACGGAGGGTTGGCCGAGTGGTCTAAGGCGGCAGACTTAAGATCTGTTGGACGGTTGTCCGCGCGAGTTCGAACCTCGCATCCTTCAGTAATATTTTTTTAATATACATTTTCTCTGCCATCATGGCTTAAAAAATGCTTAAAAGAAGGGAATTAGGGGGGATGGATGAACTAAGACATAACTTTCTTTTCTTCAATTCGAACTCTGTTGGGAAGAGTTGCTTTAAAAAAGACTCTCTATCCATCTATAAAATTTATTAAAACTTTTGAACTGCACAGAATGATTGGCTCACTTAGAAACAAATTTGAGCATTTCAAAGT…	CGGCTTGTACGGTTGGTGGATAATGAGCAATAATAACGGTTTGCTTAGTTCTTACACAAACAACACCCTCAGCATCATGTCTACCGTAGATACTTCTATCGTCAGCTCTCAACAACATGAACTTTTGGCCTTGAATATGCAAACCATTGCTTTGCAAACCAGCTGGATTGTCGAAGCCTTGAACAATTTCACCAATTTCGTTTGGTTGCAAAGATAGGCCACCAGAAGTAGCCCAAACAGCGTCACCTGCTCTCGAGTAGATGACAGCTTTGTCGACTTTA
721	4638	5	5	0	0	NC_001134	347518	349584	NC_001139	256421	256523	|gene |tRNA note= GO_component: cytosol [goid 0005829] [evidence NAS] |gene |CDS[fcd=-674](+,347877,349382) note= Ybr056wp;	|gene gene= PCL10 |CDS[fcd=-804](+,255668,256969) gene= PCL10 note= Pcl10p;	CGGAGGAGCTACTAAAGAAAGAGTGCTGCAATTAATACAATTAATATAAGTGTGGTTATTGAAAATAACTATTCATTTATACGGAGGGTTGGCCGAGTGGTCTAAGGCGGCAGACTTAAGATCTGTTGGACGGTTGTCCGCGCGAGTTCGAACCTCGCATCCTTCAGTAATATTTTTTTAATATACATTTTCTCTGCCATCATGGCTTAAAAAATGCTTAAAAGAAGGGAATTAGGGGGGATGGATGAACTAAGACATAACTTTCTTTTCTTCAATTCGAACTCTGTTGGGAAGAGTTGCTTTAAAAAAGACTCTCTATCCATCTATAAAATTTATTAAAACTTTTGAACTGCACAGAATGATTGGCTCACTTAGAAACAAATTTGAGCATTTCAAAGT…	CGGTTGATGTAGAAGTGCCCCACATATCGGTTGATGAAGCTCTGGCGAATTTCAAGGAAACCATAGAACTACTACTAAAACTTAGTGGCAATAGAAAGTGTA
721	11208	3	3	0	0	NC_001134	347518	349584	NC_001146	442052	442429	|gene |tRNA note= GO_component: cytosol [goid 0005829] [evidence NAS] |gene |CDS[fcd=-674](+,347877,349382) note= Ybr056wp;	|gene gene= PHO23 |CDS[fcd=120](-,441368,442360) gene= PHO23 note= Pho23p;	CGGAGGAGCTACTAAAGAAAGAGTGCTGCAATTAATACAATTAATATAAGTGTGGTTATTGAAAATAACTATTCATTTATACGGAGGGTTGGCCGAGTGGTCTAAGGCGGCAGACTTAAGATCTGTTGGACGGTTGTCCGCGCGAGTTCGAACCTCGCATCCTTCAGTAATATTTTTTTAATATACATTTTCTCTGCCATCATGGCTTAAAAAATGCTTAAAAGAAGGGAATTAGGGGGGATGGATGAACTAAGACATAACTTTCTTTTCTTCAATTCGAACTCTGTTGGGAAGAGTTGCTTTAAAAAAGACTCTCTATCCATCTATAAAATTTATTAAAACTTTTGAACTGCACAGAATGATTGGCTCACTTAGAAACAAATTTGAGCATTTCAAAGT…	CGGGACGTCAATCTGTCTAGATTATCCAGCATAATGGATGAGACATGCATTTTCTCCTCCAGCGATGGCATCAGTTCTTCATAAATCTTGTTGATATTATTGAGCAGTCTTACTTGTGTTTGGTGATCTTTATTGAAGTCTTTCTTCAAGAACTTATCTATCCTCTCGTTCAAATTCGGCATAGAATGCACACATTTTGCATCTATTTCGTGTAGTAATGTTAAATATCTGGAGGTGGCCAGTGGGAATTCCTCCAGCACGTCAGTTATGTCGTTTAATCCAGGGAATAGGTTCGCTGGTGAACTCATTTGTACGTATTTCAGACTATGAACGTGGTTGCTGTTTGTGATACTGCAAGACTACAAACTTTTCTCCTT
721	12161	88	88	0	0	NC_001134	347518	349584	NC_001147	505453	505521	|gene |tRNA note= GO_component: cytosol [goid 0005829] [evidence NAS] |gene |CDS[fcd=-674](+,347877,349382) note= Ybr056wp;	|neigh_up CDS[fcd=-1158](-,503553,504329) gene= RKI1 note= Rki1p; |neigh_down CDS[fcd=2019](-,506979,507506) note= Yor097cp;	CGGAGGAGCTACTAAAGAAAGAGTGCTGCAATTAATACAATTAATATAAGTGTGGTTATTGAAAATAACTATTCATTTATACGGAGGGTTGGCCGAGTGGTCTAAGGCGGCAGACTTAAGATCTGTTGGACGGTTGTCCGCGCGAGTTCGAACCTCGCATCCTTCAGTAATATTTTTTTAATATACATTTTCTCTGCCATCATGGCTTAAAAAATGCTTAAAAGAAGGGAATTAGGGGGGATGGATGAACTAAGACATAACTTTCTTTTCTTCAATTCGAACTCTGTTGGGAAGAGTTGCTTTAAAAAAGACTCTCTATCCATCTATAAAATTTATTAAAACTTTTGAACTGCACAGAATGATTGGCTCACTTAGAAACAAATTTGAGCATTTCAAAGT…	CGGCTAGCTGGAGACCATGGCTCTGCCTAGGATTTCTCTTATGCTTTCCTTTCACCAATCACTTTGTT
721	2479	49	49	0	0	NC_001134	347518	349584	NC_001136	725628	726340	|gene |tRNA note= GO_component: cytosol [goid 0005829] [evidence NAS] |gene |CDS[fcd=-674](+,347877,349382) note= Ybr056wp;	|gene gene= YCF1 |CDS[fcd=1564](-,723001,727548) gene= YCF1 note= Ycf1p;	CGGAGGAGCTACTAAAGAAAGAGTGCTGCAATTAATACAATTAATATAAGTGTGGTTATTGAAAATAACTATTCATTTATACGGAGGGTTGGCCGAGTGGTCTAAGGCGGCAGACTTAAGATCTGTTGGACGGTTGTCCGCGCGAGTTCGAACCTCGCATCCTTCAGTAATATTTTTTTAATATACATTTTCTCTGCCATCATGGCTTAAAAAATGCTTAAAAGAAGGGAATTAGGGGGGATGGATGAACTAAGACATAACTTTCTTTTCTTCAATTCGAACTCTGTTGGGAAGAGTTGCTTTAAAAAAGACTCTCTATCCATCTATAAAATTTATTAAAACTTTTGAACTGCACAGAATGATTGGCTCACTTAGAAACAAATTTGAGCATTTCAAAGT…	CGGTTTCCGTTGCCATAAAAAGGTAGCATCATCTCCAATGTTAATGGCTACATCGCCAATATTTTTTACTTTTGGTAAACGCTGAACCGAATCTGGTTGTAGCTCTTCATTGGTAAAGAATGTAAATAATCTACCAATAGAAACAGAAGCTTCGATAAAAGAATTTAAAACCATAGGAATAATCATTAGTGGGAATGAGAGCAGGTTGAACAGAGTCAAAGCAGGGAAAACTAAGTCAGTAGTCAATGCTCTATCCTCAGTATAAACAAATACAGCAAAGGTACAACATGAAACAAGGAATGGTACTATATTGAACTGAAAACTTGTCACAGCCATATAACATCCTAGTTTTGTAAGATTTTTTAACTCTTTGTTATTTCTTACTTCTTCTAGCTTTTC…
721	7378	99	99	0	0	NC_001134	347518	349584	NC_001142	608131	608768	|gene |tRNA note= GO_component: cytosol [goid 0005829] [evidence NAS] |gene |CDS[fcd=-674](+,347877,349382) note= Ybr056wp;	|gene gene= RPL43B gene= RPL43B note= Rpl43bp; |neigh_up CDS[fcd=-2802](-,604565,605647) gene= IME1 note= Ime1p; |neigh_down CDS[fcd=1320](+,609769,610737) gene= SFC1 note= Sfc1p;	CGGAGGAGCTACTAAAGAAAGAGTGCTGCAATTAATACAATTAATATAAGTGTGGTTATTGAAAATAACTATTCATTTATACGGAGGGTTGGCCGAGTGGTCTAAGGCGGCAGACTTAAGATCTGTTGGACGGTTGTCCGCGCGAGTTCGAACCTCGCATCCTTCAGTAATATTTTTTTAATATACATTTTCTCTGCCATCATGGCTTAAAAAATGCTTAAAAGAAGGGAATTAGGGGGGATGGATGAACTAAGACATAACTTTCTTTTCTTCAATTCGAACTCTGTTGGGAAGAGTTGCTTTAAAAAAGACTCTCTATCCATCTATAAAATTTATTAAAACTTTTGAACTGCACAGAATGATTGGCTCACTTAGAAACAAATTTGAGCATTTCAAAGT…	CGGAGAGAAAACTCAGACCCACTGGGAAGTTCCTACCTGCCGAGTAAGACCAGCTTGAAAAATTTGAAATTTCAACTGAGAATCAGAATATATTACTGCCCTTCGTGTTGTAGGGTTATTCATTAACTATATACGATATTATAAACAGCATAGATAATCAAACAAAAAAATGTATGCATATAATAGAGGAATTGGATGACTAAATGTTCTTATATTGGAGTTAGTGGAGATGCGTGGTAGATTTGAATTAAATAGAAAGTGCTGGGGTTGATAAACCACGAAATATCGCAGTTGAGGAGAATGATAAGCCAGGATAGATGGTAGCGCATTTTTGGGGCAATCTCACTGTAGGTCCACCACAACTCAATATGACTACATCGAATCAGTTATAAGGCAAGT…
721	10724	2	2	0	0	NC_001134	347518	349584	NC_001146	59921	60520	|gene |tRNA note= GO_component: cytosol [goid 0005829] [evidence NAS] |gene |CDS[fcd=-674](+,347877,349382) note= Ybr056wp;	|gene gene= YPT11 |CDS[fcd=77](+,60297,61550) gene= YPT11 note= Ypt11p;	CGGAGGAGCTACTAAAGAAAGAGTGCTGCAATTAATACAATTAATATAAGTGTGGTTATTGAAAATAACTATTCATTTATACGGAGGGTTGGCCGAGTGGTCTAAGGCGGCAGACTTAAGATCTGTTGGACGGTTGTCCGCGCGAGTTCGAACCTCGCATCCTTCAGTAATATTTTTTTAATATACATTTTCTCTGCCATCATGGCTTAAAAAATGCTTAAAAGAAGGGAATTAGGGGGGATGGATGAACTAAGACATAACTTTCTTTTCTTCAATTCGAACTCTGTTGGGAAGAGTTGCTTTAAAAAAGACTCTCTATCCATCTATAAAATTTATTAAAACTTTTGAACTGCACAGAATGATTGGCTCACTTAGAAACAAATTTGAGCATTTCAAAGT…	CGGGTACCCTGGTTGCGTTGCCGCCCCAATCTGCCATAGGCCCACCCATAAGAGTTTAGAAATGAATTATTCCTGGGCCAATGCTGCGATCACGAAAATTATCAACATCTTGATAAATTAATAGCAAGTTGGACTAACTTACAGGTTTTCTCGTGAGGGAAGTGGAAGAGAAAGAAGAAAGGAGCGTATGCAACTGCCCTTGGCAGCCGCCCATCGTCACTCATGGCCGTTACGCGCCGCGGCCGAAACACGCCAAATGCTATGTACATAACGGAAATGCTAATACGTAACAATATAATAATATAAAGCTTTCATAAGTCTTGGCACTGGCACTTGCATCAGCATCTCGTATATTAGATACATCATCAAGTCCATATGTCCCAGAGAAAGCGATACTCA…
721	5190	2	2	0	0	NC_001134	347518	349584	NC_001139	754426	755193	|gene |tRNA note= GO_component: cytosol [goid 0005829] [evidence NAS] |gene |CDS[fcd=-674](+,347877,349382) note= Ybr056wp;	|gene |CDS[fcd=-78](+,754731,755255) note= Ygr131wp;	CGGAGGAGCTACTAAAGAAAGAGTGCTGCAATTAATACAATTAATATAAGTGTGGTTATTGAAAATAACTATTCATTTATACGGAGGGTTGGCCGAGTGGTCTAAGGCGGCAGACTTAAGATCTGTTGGACGGTTGTCCGCGCGAGTTCGAACCTCGCATCCTTCAGTAATATTTTTTTAATATACATTTTCTCTGCCATCATGGCTTAAAAAATGCTTAAAAGAAGGGAATTAGGGGGGATGGATGAACTAAGACATAACTTTCTTTTCTTCAATTCGAACTCTGTTGGGAAGAGTTGCTTTAAAAAAGACTCTCTATCCATCTATAAAATTTATTAAAACTTTTGAACTGCACAGAATGATTGGCTCACTTAGAAACAAATTTGAGCATTTCAAAGT…	CGGCAGAATGTCGCGCTTGTATTCTCATGAACTTTTCCTCTTTACGAACCCTTTGGCGGCATGCCGTTTAAAATCTGTTGAAGATTTCCTTTACGAACAATGAGCAATGTTTTGCACAGGCAGGTGGGAAGTAGGGCCTATCGCGCCTTGGATGCAGATATAAGTATAAATATAAATTATAATAATTGGCTGTATCAGTAAATCCTTCTTGCGATGGGAGGAAGCACGATAGAGTATGTTAAGCTTTTGAGAGGCTTCATATTCATTGGAATTTTAAATAACAATAAAGCAACAACAATAATAAATGCTATCAGCTGCAGATAATTTAGTGCGCATCATAAATGCTGTTTTTCTTATTATATCCATAGGTCTAATCAGCGGCCTGATAGGTACACAGAC…
721	9526	1	1	0	0	NC_001134	347518	349584	NC_001144	1011816	1012617	|gene |tRNA note= GO_component: cytosol [goid 0005829] [evidence NAS] |gene |CDS[fcd=-674](+,347877,349382) note= Ybr056wp;	|gene |CDS(-,1011619,1012020) note= Ylr437cp; |gene gene= CAR2 |CDS(+,1012498,1013772) gene= CAR2 note= Car2p;	CGGAGGAGCTACTAAAGAAAGAGTGCTGCAATTAATACAATTAATATAAGTGTGGTTATTGAAAATAACTATTCATTTATACGGAGGGTTGGCCGAGTGGTCTAAGGCGGCAGACTTAAGATCTGTTGGACGGTTGTCCGCGCGAGTTCGAACCTCGCATCCTTCAGTAATATTTTTTTAATATACATTTTCTCTGCCATCATGGCTTAAAAAATGCTTAAAAGAAGGGAATTAGGGGGGATGGATGAACTAAGACATAACTTTCTTTTCTTCAATTCGAACTCTGTTGGGAAGAGTTGCTTTAAAAAAGACTCTCTATCCATCTATAAAATTTATTAAAACTTTTGAACTGCACAGAATGATTGGCTCACTTAGAAACAAATTTGAGCATTTCAAAGT…	CGGCTGTAGTGAAGCGTCCGAGGTGCTCGGCGTCCTCGATGCATAACCCTGGTCGACCCGCTGTCTGATTCGCATACCCACAGTCATCAACTGGTCCTTGTGGAAATCCTGTTGCTGCTGCTGCTGCTGCTCCTGTTGTTGTTGTTGTTGTTGAAGCTGTCTCTTTGGGACGAGGCTGCTTGCCCATTCCAGTTGTGCGTCCATTAAGTCTTGTTTGTTCCTGTATTAGTGTGTGATGTAAAGCGTGCGTTTCTTGATCTGGGTTCTCTTGCTGTTTCTTTTTCTTTGTTTTCTTCTCCAATCCTTGCCTGTTGCTACTAGATAAATAAATACCCCACTGGCGGGAAAAAGAAAAAGCACACACACAAACAAACGAGAAGAAAAAAGCGCGTGGTACGA…
721	9525	2	2	0	0	NC_001134	347518	349584	NC_001144	1011433	1011815	|gene |tRNA note= GO_component: cytosol [goid 0005829] [evidence NAS] |gene |CDS[fcd=-674](+,347877,349382) note= Ybr056wp;	|gene |CDS[fcd=396](-,1011619,1012020) note= Ylr437cp;	CGGAGGAGCTACTAAAGAAAGAGTGCTGCAATTAATACAATTAATATAAGTGTGGTTATTGAAAATAACTATTCATTTATACGGAGGGTTGGCCGAGTGGTCTAAGGCGGCAGACTTAAGATCTGTTGGACGGTTGTCCGCGCGAGTTCGAACCTCGCATCCTTCAGTAATATTTTTTTAATATACATTTTCTCTGCCATCATGGCTTAAAAAATGCTTAAAAGAAGGGAATTAGGGGGGATGGATGAACTAAGACATAACTTTCTTTTCTTCAATTCGAACTCTGTTGGGAAGAGTTGCTTTAAAAAAGACTCTCTATCCATCTATAAAATTTATTAAAACTTTTGAACTGCACAGAATGATTGGCTCACTTAGAAACAAATTTGAGCATTTCAAAGT…	CGGCGGAAAAGCAAGGAAAAACCCCCTGAAGCCAAAGCAACTGCGATAGTTTTTATTATTTGTTATATCCTCTATAAAAAATGTGCGAACAAGAGAAAAGACTATATAAAGAATCTATAAAAGAGAAAGTAAAGTAGGAAAAAGAGAGAAAAAAAGAGAGAGATAAAAAAAATTGTGCAAGTCTGTTAAAGTCTTCTCTTGGATCCATTAACCATTGTTTCGTGCTCCGCGGCAGGTTCCGCGACGTCCCATTTCTCGAGCGAGGACGCCTCGGTCGACATTGTTCTCTGGTTTATCAGCATAGGTGGTAGCGAGTTAGCAGTGGGCAAGGGCGACCTTGTAAATTGCGGAACAATAACGCTCGAGTAATCTCTAATGACAC
721	8551	28	28	0	0	NC_001134	347518	349584	NC_001144	187896	188290	|gene |tRNA note= GO_component: cytosol [goid 0005829] [evidence NAS] |gene |CDS[fcd=-674](+,347877,349382) note= Ybr056wp;	|gene gene= UBR2 |CDS[fcd=5189](-,187664,193282) gene= UBR2 note= Ubr2p;	CGGAGGAGCTACTAAAGAAAGAGTGCTGCAATTAATACAATTAATATAAGTGTGGTTATTGAAAATAACTATTCATTTATACGGAGGGTTGGCCGAGTGGTCTAAGGCGGCAGACTTAAGATCTGTTGGACGGTTGTCCGCGCGAGTTCGAACCTCGCATCCTTCAGTAATATTTTTTTAATATACATTTTCTCTGCCATCATGGCTTAAAAAATGCTTAAAAGAAGGGAATTAGGGGGGATGGATGAACTAAGACATAACTTTCTTTTCTTCAATTCGAACTCTGTTGGGAAGAGTTGCTTTAAAAAAGACTCTCTATCCATCTATAAAATTTATTAAAACTTTTGAACTGCACAGAATGATTGGCTCACTTAGAAACAAATTTGAGCATTTCAAAGT…	CGGTCATTAAGAAAACTCCGTAAGCGGAGGTGATTTCGCATCCATTTCTCATATGATCAGTACATTCCCCCTGTAAATAACCTTGCAGTGCTATGCTTTTTTGAATATGGCATTTTTGGCCACACAACAAGCATACTGCGATTTCGTATTTATCACATTTATTCGATATTTCATCATTATCAAGGGAAAATTTGGAAAGGTTCAATGGTAGTTCGATAAGCTGGATATGCTCTGGTGAAGGATATGCTCTTGTGTTTATGTTCTGCACCATGTCATATATTACTTGCTGAATTCTCAAATTATCATTACCATCATTATACCTTTCTATATTTTGTGTTAGTTCGTTGTAGAAAAAATCCTTCAAAAAGTGAGTTAAATTGGGTAATTTAAAATA
721	6828	2	2	0	0	NC_001134	347518	349584	NC_001142	79579	80281	|gene |tRNA note= GO_component: cytosol [goid 0005829] [evidence NAS] |gene |CDS[fcd=-674](+,347877,349382) note= Ybr056wp;	|gene gene= MNN5 |CDS[fcd=223](+,80153,81913) gene= MNN5 note= Mnn5p;	CGGAGGAGCTACTAAAGAAAGAGTGCTGCAATTAATACAATTAATATAAGTGTGGTTATTGAAAATAACTATTCATTTATACGGAGGGTTGGCCGAGTGGTCTAAGGCGGCAGACTTAAGATCTGTTGGACGGTTGTCCGCGCGAGTTCGAACCTCGCATCCTTCAGTAATATTTTTTTAATATACATTTTCTCTGCCATCATGGCTTAAAAAATGCTTAAAAGAAGGGAATTAGGGGGGATGGATGAACTAAGACATAACTTTCTTTTCTTCAATTCGAACTCTGTTGGGAAGAGTTGCTTTAAAAAAGACTCTCTATCCATCTATAAAATTTATTAAAACTTTTGAACTGCACAGAATGATTGGCTCACTTAGAAACAAATTTGAGCATTTCAAAGT…	CGGAGGAATAAAAAAAAGAAACATACACATCACGTGACCACAAGAATGTTAGAAAGGCTTACCAGTACTAGAGACGTTAATAAATTGCGAATAGCCCCCTATCTCCCACATGTTGGCATCTGTGAGGTGGAACCTATTTAAAGGTGCCACATTTCTTTCCTTAGAGGACGATGGTTGCAAGATCAGCACAAATCCATAGTTTGATGCATGGAAAGCGAAGCACTCTAACAGAAGTAAGATAATAAACAATCTCACGATTCTACTGATTTAAGTGCAACTAGCTCTTGGGCTTCTTTTGGTTGCCAAGTCGGAATAGACGACAGATGCATGTTTCGGTGCAGAGTTCAGAGAGATAAGTGCCTTCTTTTATCTTTTTCCCCGTTCTTGCGGATTTTTTTT…
721	2969	2	2	0	0	NC_001134	347518	349584	NC_001136	1203725	1204370	|gene |tRNA note= GO_component: cytosol [goid 0005829] [evidence NAS] |gene |CDS[fcd=-674](+,347877,349382) note= Ybr056wp;	|gene gene= CDC40 note= synonyms: SLU4, SLT15, PRP17 |CDS[fcd=155](-,1202835,1204202) gene= CDC40 note= Cdc40p;	CGGAGGAGCTACTAAAGAAAGAGTGCTGCAATTAATACAATTAATATAAGTGTGGTTATTGAAAATAACTATTCATTTATACGGAGGGTTGGCCGAGTGGTCTAAGGCGGCAGACTTAAGATCTGTTGGACGGTTGTCCGCGCGAGTTCGAACCTCGCATCCTTCAGTAATATTTTTTTAATATACATTTTCTCTGCCATCATGGCTTAAAAAATGCTTAAAAGAAGGGAATTAGGGGGGATGGATGAACTAAGACATAACTTTCTTTTCTTCAATTCGAACTCTGTTGGGAAGAGTTGCTTTAAAAAAGACTCTCTATCCATCTATAAAATTTATTAAAACTTTTGAACTGCACAGAATGATTGGCTCACTTAGAAACAAATTTGAGCATTTCAAAGT…	CGGATAATTACGTATAACTTTTTTTGGTAAGTAACACCGAAAGGATATCCTTTCCTCACGAAGATCAACATCGACGTCATTTGGTGGATATAAATATCCTCTGCCTTGATAGTCCTTTTCTGATTTACCATAAAAATGGGAGACTTCCTCTACCTCTATCTGTTCCGAATCTAGGTTGTCCTCAGCCAGCGCGTGCACGAAGATATCCTGATCTTCTTTCTGAGTTTCGCTGGCTTGTGAAGTTTCATCGTCACTACTTGACCAACTGCCCCACGGCCCATCTCCTTTGCGAGTTTTCCGTCTTCTTTTTAGTTCTGACTTTGTAAAATGTGATTTTCTCTTATGAATATTATTTGAAGAAGGTTCATACGAAGTATCTTCATGCAAATTACCATTTTT…
721	13329	12	12	0	0	NC_001134	347518	349584	NC_001148	455792	456706	|gene |tRNA note= GO_component: cytosol [goid 0005829] [evidence NAS] |gene |CDS[fcd=-674](+,347877,349382) note= Ybr056wp;	|gene gene= LEE1 |CDS[fcd=-493](+,455756,456661) gene= LEE1 note= Lee1p; |rep_origin note= ARS1633	CGGAGGAGCTACTAAAGAAAGAGTGCTGCAATTAATACAATTAATATAAGTGTGGTTATTGAAAATAACTATTCATTTATACGGAGGGTTGGCCGAGTGGTCTAAGGCGGCAGACTTAAGATCTGTTGGACGGTTGTCCGCGCGAGTTCGAACCTCGCATCCTTCAGTAATATTTTTTTAATATACATTTTCTCTGCCATCATGGCTTAAAAAATGCTTAAAAGAAGGGAATTAGGGGGGATGGATGAACTAAGACATAACTTTCTTTTCTTCAATTCGAACTCTGTTGGGAAGAGTTGCTTTAAAAAAGACTCTCTATCCATCTATAAAATTTATTAAAACTTTTGAACTGCACAGAATGATTGGCTCACTTAGAAACAAATTTGAGCATTTCAAAGT…	CGGGCGGTAACGCAAGAAGAAACTCCCAATCAGCAAACGAAATGCTTGCATCGCAAATTCAGGATTTCCAGAATATTCCAAGGTCTTTCAATGACAGCAATGCAAATGTAAATTTGTCAAAAAATTGTACTGTCGGCAATCAACTGCCTTTCTCATCACGTCAACAAAAAATTATCATGGAACATTTACTGATAACGAAGAACAATTCTCAACAGCAGAAGGACTATTCACACGTGCCATGCAAATTTTTTAAGATGGGCAATTGCCAAGCTGGCTCGTCTTGTCCCTTTTCCCATTCCCCAGATATTATCAGTTCTGCGAATAATTTACCTTGCAAGTATTTCGCAAAGGGTAACTGTAAATTCGGTAACAAGTGTGTTAATGCTCATGTGCTGCCAA…
721	4664	11	11	0	0	NC_001134	347518	349584	NC_001139	273169	274095	|gene |tRNA note= GO_component: cytosol [goid 0005829] [evidence NAS] |gene |CDS[fcd=-674](+,347877,349382) note= Ybr056wp;	|gene gene= MET13 note= synonym: MET11 |CDS[fcd=-1106](+,272526,274328) gene= MET13 note= Met13p;	CGGAGGAGCTACTAAAGAAAGAGTGCTGCAATTAATACAATTAATATAAGTGTGGTTATTGAAAATAACTATTCATTTATACGGAGGGTTGGCCGAGTGGTCTAAGGCGGCAGACTTAAGATCTGTTGGACGGTTGTCCGCGCGAGTTCGAACCTCGCATCCTTCAGTAATATTTTTTTAATATACATTTTCTCTGCCATCATGGCTTAAAAAATGCTTAAAAGAAGGGAATTAGGGGGGATGGATGAACTAAGACATAACTTTCTTTTCTTCAATTCGAACTCTGTTGGGAAGAGTTGCTTTAAAAAAGACTCTCTATCCATCTATAAAATTTATTAAAACTTTTGAACTGCACAGAATGATTGGCTCACTTAGAAACAAATTTGAGCATTTCAAAGT…	CGGGATCATGCCGATCACTACCTACGCGGCCTTCTTGAGAAGGGCCCAATGGGGCCAAATCTCCATCCCTCAACATTTCTCGTCCCGATTGGATCCTATCAAGGACGATGACGAGTTGGTCCGTGATATCGGAACTAACTTGATCGTGGAAATGTGTCAAAAATTGCTCGACAGTGGTTACGTTTCTCACTTGCACATCTACACCATGAACTTGGAAAAAGCGCCTCTCATGATTCTGGAAAGATTGAACATTCTACCTACGGAATCAGAGTTCAATGCACATCCATTGGCCGTGTTGCCATGGAGAAAATCTTTGAATCCAAAGCGTAAAAACGAGGAAGTCAGACCTATCTTCTGGAAGAGAAGACCTTACTCCTATGTCGCAAGAACCTCTCAATG…
721	5161	1	1	0	0	NC_001134	347518	349584	NC_001139	732103	732369	|gene |tRNA note= GO_component: cytosol [goid 0005829] [evidence NAS] |gene |CDS[fcd=-674](+,347877,349382) note= Ybr056wp;	|gene gene= MEP1 note= synonym: AMT1 |CDS[fcd=696](-,731454,732932) gene= MEP1 note= Mep1p;	CGGAGGAGCTACTAAAGAAAGAGTGCTGCAATTAATACAATTAATATAAGTGTGGTTATTGAAAATAACTATTCATTTATACGGAGGGTTGGCCGAGTGGTCTAAGGCGGCAGACTTAAGATCTGTTGGACGGTTGTCCGCGCGAGTTCGAACCTCGCATCCTTCAGTAATATTTTTTTAATATACATTTTCTCTGCCATCATGGCTTAAAAAATGCTTAAAAGAAGGGAATTAGGGGGGATGGATGAACTAAGACATAACTTTCTTTTCTTCAATTCGAACTCTGTTGGGAAGAGTTGCTTTAAAAAAGACTCTCTATCCATCTATAAAATTTATTAAAACTTTTGAACTGCACAGAATGATTGGCTCACTTAGAAACAAATTTGAGCATTTCAAAGT…	CGGAGCACAGACCAACTGTCGACCATTTCTTCTCCGATCTGTAATCCAGAAGACACCACGTCATCCCACCAGTAATGGCACTGAGACATGTATTCATGAATGCATAAACTGACCTCAAATTTGGGGATAATGAGGATGCAGAATTAAATAGCAGCCAGCCAAACCACAGTATGGATGTGCCTAGAGTGACCAATGAAACATTATGAGGCCTGAAATTTATCAGTAACTTTTCATTTCTTTTGCCCAAAAACCAAGAGTAAACAAAC
721	12324	20	20	0	0	NC_001134	347518	349584	NC_001147	631914	637031	|gene |tRNA note= GO_component: cytosol [goid 0005829] [evidence NAS] |gene |CDS[fcd=-674](+,347877,349382) note= Ybr056wp;	|gene gene= PET123 |CDS(+,632165,633121) gene= PET123 note= Pet123p; |gene gene= SME1 |CDS(-,633283,633567) gene= SME1 note= Sme1p; |gene gene= MTR10 note= synonym: KAP111 |CDS(+,633840,636758) gene= MTR10 note= Mtr10p; |gene gene= PNS1 |CDS(-,636940,638559) gene= PNS1 note= Pns1p;	CGGAGGAGCTACTAAAGAAAGAGTGCTGCAATTAATACAATTAATATAAGTGTGGTTATTGAAAATAACTATTCATTTATACGGAGGGTTGGCCGAGTGGTCTAAGGCGGCAGACTTAAGATCTGTTGGACGGTTGTCCGCGCGAGTTCGAACCTCGCATCCTTCAGTAATATTTTTTTAATATACATTTTCTCTGCCATCATGGCTTAAAAAATGCTTAAAAGAAGGGAATTAGGGGGGATGGATGAACTAAGACATAACTTTCTTTTCTTCAATTCGAACTCTGTTGGGAAGAGTTGCTTTAAAAAAGACTCTCTATCCATCTATAAAATTTATTAAAACTTTTGAACTGCACAGAATGATTGGCTCACTTAGAAACAAATTTGAGCATTTCAAAGT…	CGGGTTATAAAATACGAAACATGGCCCTAATTTACCCGCTTTTACAATAAAGGGTTTGTAATGAGGGTAAAAATATTGGCCCTAATGAAAAATCACTAGCAACGGAAGTGCAAGTAGAACCCTGAAGTCGCCGAGTAGGAAAGTGATTCCCAAGAGGAGTAGAATAAAGAAGAGAATCTACATATGGATTATTTAGGTAATAGTTTCATTGCTGATTGTCAACAACAATAATAACAAGGATAATTGAAGTATGGGGAAAGGTGCGGCCAAGTATGGTTTTAAAAGTGGGGTTTTCCCCACAACAAGGTCCATTCTGAAGAGCCCCACTACAAAGCAGACTGATATTATTAATAAGGTAAAATCACCCAAGCCCAAGGGTGTTCTTGGTATTGGGTATGC…
721	13416	1001	1001	0	0	NC_001134	347518	349584	NC_001148	526780	527160	|gene |tRNA note= GO_component: cytosol [goid 0005829] [evidence NAS] |gene |CDS[fcd=-674](+,347877,349382) note= Ybr056wp;	|gene gene= HST2 |CDS[fcd=-90](-,525807,526880) gene= HST2 note= Hst2p;	CGGAGGAGCTACTAAAGAAAGAGTGCTGCAATTAATACAATTAATATAAGTGTGGTTATTGAAAATAACTATTCATTTATACGGAGGGTTGGCCGAGTGGTCTAAGGCGGCAGACTTAAGATCTGTTGGACGGTTGTCCGCGCGAGTTCGAACCTCGCATCCTTCAGTAATATTTTTTTAATATACATTTTCTCTGCCATCATGGCTTAAAAAATGCTTAAAAGAAGGGAATTAGGGGGGATGGATGAACTAAGACATAACTTTCTTTTCTTCAATTCGAACTCTGTTGGGAAGAGTTGCTTTAAAAAAGACTCTCTATCCATCTATAAAATTTATTAAAACTTTTGAACTGCACAGAATGATTGGCTCACTTAGAAACAAATTTGAGCATTTCAAAGT…	CGGCACCCACCATAAAGATTACTTTAGCGTTGGGGTTGCTTTTCATATGAGCAGCGATCTTCCTAACCGACATCTCTGTAGAGGCGGTAGAAACAGACATCGAAACACGGAGAGATCGCGGTACGTCTGGTTGGTAGCTCAGTGACGGGCACAGATAGCGACATTTACTGATACAGAGACAGTTACGAAAGATGGAAACACATGCAGAGAATGTGGTCTATTCCTTATTCTTAAGATCGGCGAAGCTAACAGAGTTAATGCTGGGCCATAGCTGGACGGCAGAAAGCACGCAGGCAGGGGGCCTCTGCGTAGGGCGGGAGACGCCTCCGTAAGGAAAACGGCGCGGGAAGGGCGGCTTCTTACTACATTTTTTTGCCACT
721	12267	1	1	0	0	NC_001134	347518	349584	NC_001147	586070	586192	|gene |tRNA note= GO_component: cytosol [goid 0005829] [evidence NAS] |gene |CDS[fcd=-674](+,347877,349382) note= Ybr056wp;	|gene gene= RUP1 |CDS[fcd=194](-,584310,586325) gene= RUP1 note= Rup1p;	CGGAGGAGCTACTAAAGAAAGAGTGCTGCAATTAATACAATTAATATAAGTGTGGTTATTGAAAATAACTATTCATTTATACGGAGGGTTGGCCGAGTGGTCTAAGGCGGCAGACTTAAGATCTGTTGGACGGTTGTCCGCGCGAGTTCGAACCTCGCATCCTTCAGTAATATTTTTTTAATATACATTTTCTCTGCCATCATGGCTTAAAAAATGCTTAAAAGAAGGGAATTAGGGGGGATGGATGAACTAAGACATAACTTTCTTTTCTTCAATTCGAACTCTGTTGGGAAGAGTTGCTTTAAAAAAGACTCTCTATCCATCTATAAAATTTATTAAAACTTTTGAACTGCACAGAATGATTGGCTCACTTAGAAACAAATTTGAGCATTTCAAAGT…	CGGCATATCAATGTCTTGGTCCCCGTTGTTCGGAACATCGCAGGGCTTGGTTCCAGCCACTATTTTGTTCTCAGAAATCCTAGGCTGACTGCCATCATTCTCCTCACCCATTTCCGCTTGCT
721	13889	91	139	0	0	NC_001134	347518	349584	NC_001224	10778	10863	|gene |tRNA note= GO_component: cytosol [goid 0005829] [evidence NAS] |gene |CDS[fcd=-674](+,347877,349382) note= Ybr056wp;	|neigh_up NC_001224-start |neigh_down CDS[fcd=2998](+,13818,16322) gene= AI1 note= Reverse transcriptase required for splicing of the	CGGAGGAGCTACTAAAGAAAGAGTGCTGCAATTAATACAATTAATATAAGTGTGGTTATTGAAAATAACTATTCATTTATACGGAGGGTTGGCCGAGTGGTCTAAGGCGGCAGACTTAAGATCTGTTGGACGGTTGTCCGCGCGAGTTCGAACCTCGCATCCTTCAGTAATATTTTTTTAATATACATTTTCTCTGCCATCATGGCTTAAAAAATGCTTAAAAGAAGGGAATTAGGGGGGATGGATGAACTAAGACATAACTTTCTTTTCTTCAATTCGAACTCTGTTGGGAAGAGTTGCTTTAAAAAAGACTCTCTATCCATCTATAAAATTTATTAAAACTTTTGAACTGCACAGAATGATTGGCTCACTTAGAAACAAATTTGAGCATTTCAAAGT…	CGGAAGGAGATAAATATATTATATTTTTATTCCTACCTATTAAAGGTAAAGACTCGATTCTCATAATTAAATTTATATCCTTCGG
721	8475	411	411	0	0	NC_001134	347518	349584	NC_001144	114799	115209	|gene |tRNA note= GO_component: cytosol [goid 0005829] [evidence NAS] |gene |CDS[fcd=-674](+,347877,349382) note= Ybr056wp;	|gene gene= SDC25 note= YLL016W |neigh_up CDS[fcd=-3430](-,109901,111574) gene= DPS1 note= Dps1p; |neigh_down CDS[fcd=1427](+,116431,121110) gene= BPT1 note= Bpt1p;	CGGAGGAGCTACTAAAGAAAGAGTGCTGCAATTAATACAATTAATATAAGTGTGGTTATTGAAAATAACTATTCATTTATACGGAGGGTTGGCCGAGTGGTCTAAGGCGGCAGACTTAAGATCTGTTGGACGGTTGTCCGCGCGAGTTCGAACCTCGCATCCTTCAGTAATATTTTTTTAATATACATTTTCTCTGCCATCATGGCTTAAAAAATGCTTAAAAGAAGGGAATTAGGGGGGATGGATGAACTAAGACATAACTTTCTTTTCTTCAATTCGAACTCTGTTGGGAAGAGTTGCTTTAAAAAAGACTCTCTATCCATCTATAAAATTTATTAAAACTTTTGAACTGCACAGAATGATTGGCTCACTTAGAAACAAATTTGAGCATTTCAAAGT…	CGGTTAAATGTAGGGTGGTTGAGATTATGACAACCTTTTTCAAGCAATATTGGTTCCTGGGCTATGATGAGCCCGATCTTGCGACCCTAAATCTGGATTATTTTGCGCAAGTAGCAATCAAGGAAAATATAACAGGATCTGTGGAATTACTAAAGGAGGTCAATCAGAAGTTTAAACATGGTAATATACAAGAAGCGACTGCACCAATGAAAACGTTAGATCAACAGATCTGCCAGGACCATTACTCGGGCACTTTATACTCTACCACGGAATCCATTTTGGCCGTCGATCCAGTTTTATTTGCCACTCAATTAACGATACTAGAGCATGAAATTTATTGTGAGATAACCATTTTTGATTGTTTACAAAAAATTTGGAAGAACAAGTATACAAAATCGT…
721	4201	61	61	0	0	NC_001134	347518	349584	NC_001138	147046	147781	|gene |tRNA note= GO_component: cytosol [goid 0005829] [evidence NAS] |gene |CDS[fcd=-674](+,347877,349382) note= Ybr056wp;	|gene gene= DEG1 note= synonym: PUS3 |CDS[fcd=-287](+,147126,148454) gene= DEG1 note= Deg1p;	CGGAGGAGCTACTAAAGAAAGAGTGCTGCAATTAATACAATTAATATAAGTGTGGTTATTGAAAATAACTATTCATTTATACGGAGGGTTGGCCGAGTGGTCTAAGGCGGCAGACTTAAGATCTGTTGGACGGTTGTCCGCGCGAGTTCGAACCTCGCATCCTTCAGTAATATTTTTTTAATATACATTTTCTCTGCCATCATGGCTTAAAAAATGCTTAAAAGAAGGGAATTAGGGGGGATGGATGAACTAAGACATAACTTTCTTTTCTTCAATTCGAACTCTGTTGGGAAGAGTTGCTTTAAAAAAGACTCTCTATCCATCTATAAAATTTATTAAAACTTTTGAACTGCACAGAATGATTGGCTCACTTAGAAACAAATTTGAGCATTTCAAAGT…	CGGCTCAAAATAAAGAATAATATAGTATTCTCGAGGTGCCCACATGCAATCTTTACTGCCCTACTATAACCTCCCTTGAATGAGTAATTTCATTAGAAGGCTAGTTGGGAAAATGAAAGCGATTTCAACAGGTACCAATGCTATTGTTAGTAAGAAGGACTCCATTTACGCAAACTGGTCCAAAGAGCAGCTAATACGAAGGATCACTGAACTAGAAAACGCAAATAAGCCACATTCTGAAAAATTCCAGCACATCGAGGATAACAAAAAGCGCAAAATTTCGCAAGAAGAGGTTACGAGAAGCAAGGCGAAAAAGGCTCCGAAGAAGTTTGACTTTTCTAAACATAATACCAGGTTCATCGCCTTGAGATTTGCCTATTTGGGATGGAATTACAATGG…
721	6385	7	7	0	0	NC_001134	347518	349584	NC_001141	132974	133270	|gene |tRNA note= GO_component: cytosol [goid 0005829] [evidence NAS] |gene |CDS[fcd=-674](+,347877,349382) note= Ybr056wp;	|gene gene= QDR2 |CDS[fcd=-881](+,132241,133869) gene= QDR2 note= Qdr2p;	CGGAGGAGCTACTAAAGAAAGAGTGCTGCAATTAATACAATTAATATAAGTGTGGTTATTGAAAATAACTATTCATTTATACGGAGGGTTGGCCGAGTGGTCTAAGGCGGCAGACTTAAGATCTGTTGGACGGTTGTCCGCGCGAGTTCGAACCTCGCATCCTTCAGTAATATTTTTTTAATATACATTTTCTCTGCCATCATGGCTTAAAAAATGCTTAAAAGAAGGGAATTAGGGGGGATGGATGAACTAAGACATAACTTTCTTTTCTTCAATTCGAACTCTGTTGGGAAGAGTTGCTTTAAAAAAGACTCTCTATCCATCTATAAAATTTATTAAAACTTTTGAACTGCACAGAATGATTGGCTCACTTAGAAACAAATTTGAGCATTTCAAAGT…	CGGGAATGGTTCTGTCACCCCAAAATCATACTTAAATAGAGCTCCCATTCTTGTTTTGCCAACAGTAAGAAAATCATTGCATTTGGATAATCCAGATTACGAAACATTGGAACTGCCCACGCAACTAAATCTACTGGCGCCCTTCAAGATTTTGAAAGCTTATGAAATTTGTATACTTATGCTAGTCGCTGGATTACAATTTGCCATGTATACTACGCACCTTACGGCGTTATCCACAGCTTTGAGTAAACAATATCACTTGACTGTTGCAAAGGTAGGATTATGCTACCTTCCCT
721	326	80	80	0	0	NC_001134	347518	349584	NC_001134	25403	25954	|gene |tRNA note= GO_component: cytosol [goid 0005829] [evidence NAS] |gene |CDS[fcd=-674](+,347877,349382) note= Ybr056wp;	|gene gene= ECM21 |CDS[fcd=2621](-,24946,28299) gene= ECM21 note= Ecm21p;	CGGAGGAGCTACTAAAGAAAGAGTGCTGCAATTAATACAATTAATATAAGTGTGGTTATTGAAAATAACTATTCATTTATACGGAGGGTTGGCCGAGTGGTCTAAGGCGGCAGACTTAAGATCTGTTGGACGGTTGTCCGCGCGAGTTCGAACCTCGCATCCTTCAGTAATATTTTTTTAATATACATTTTCTCTGCCATCATGGCTTAAAAAATGCTTAAAAGAAGGGAATTAGGGGGGATGGATGAACTAAGACATAACTTTCTTTTCTTCAATTCGAACTCTGTTGGGAAGAGTTGCTTTAAAAAAGACTCTCTATCCATCTATAAAATTTATTAAAACTTTTGAACTGCACAGAATGATTGGCTCACTTAGAAACAAATTTGAGCATTTCAAAGT…	CGGATGGCCCACTAACTGACGTAGTTCTTGATAAGTTCAATTGTTGAATAGATAGTAAATCAGGGTCATACGAGGCCATGATATTAGGTGATCCCATCGGTGAGACAATGGGAGAAGCTGGAACGGATATGGCTTCTTCAAAAGTTGGCGGAGGTGGACATGTGTTACCAAAAAAGTCGCTGTTCATACTTAGAGGAACCTGGTTGCCTTTGCCTTCCATTGTGGCCATATCATAAGTGGGTAACTCCATATTACCACTGTTGCACTGTTCAGACACCAGGAATATGGGCGTATCGATTAGAACCTCATAATGTCTTAATTTGGACGGACACTCAGGATCAGGTTTACTGATTCGTAGCATAATTTCCAGCTTATGTCTACAGTAAACATTACTGAAGT…
721	6849	1	1	0	0	NC_001134	347518	349584	NC_001142	97273	98072	|gene |tRNA note= GO_component: cytosol [goid 0005829] [evidence NAS] |gene |CDS[fcd=-674](+,347877,349382) note= Ybr056wp;	|gene gene= CPS1 |CDS[fcd=59](+,97731,99461) gene= CPS1 note= Cps1p;	CGGAGGAGCTACTAAAGAAAGAGTGCTGCAATTAATACAATTAATATAAGTGTGGTTATTGAAAATAACTATTCATTTATACGGAGGGTTGGCCGAGTGGTCTAAGGCGGCAGACTTAAGATCTGTTGGACGGTTGTCCGCGCGAGTTCGAACCTCGCATCCTTCAGTAATATTTTTTTAATATACATTTTCTCTGCCATCATGGCTTAAAAAATGCTTAAAAGAAGGGAATTAGGGGGGATGGATGAACTAAGACATAACTTTCTTTTCTTCAATTCGAACTCTGTTGGGAAGAGTTGCTTTAAAAAAGACTCTCTATCCATCTATAAAATTTATTAAAACTTTTGAACTGCACAGAATGATTGGCTCACTTAGAAACAAATTTGAGCATTTCAAAGT…	CGGGATTTGCATATCGCTTGTTCCTACGACGTTGTCAGTTCCATAACCTCTGATTTCCCATACGGATTTTGAAAATCAGCTACGAATAGATAGTCTTTTTCTATTTTCAGTAAATGTGTCATTGAAAAAAGTTTCTTTAGAACGACGCTTTTTGCAGGCTACTAGAAACACCCACTTCTAGTAGCTTTACGTGACGAATTAAACCGCGTGATCTTCTGCACTGTTATCCTAAATGCTCAATGCTCAGAACATCTTCTTGTTATCTCAGCCTCGCCACCCTTATCTTATCATAGCGGCCTTTTATTTTCCCTTTGGGCAAAATACGATACAGCCTTCCAAGGTCGGGCAAGAAAGTTTATGACATATAAAAGAAACGGTACCCCAAATACGTCTCTTCCC…
721	5649	13	15	0	0	NC_001134	347518	349584	NC_001140	70019	71080	|gene |tRNA note= GO_component: cytosol [goid 0005829] [evidence NAS] |gene |CDS[fcd=-674](+,347877,349382) note= Ybr056wp;	|gene |CDS(+,69705,70067) note= Yhl018wp; |gene |CDS(+,70273,71871) note= Yhl017wp;	CGGAGGAGCTACTAAAGAAAGAGTGCTGCAATTAATACAATTAATATAAGTGTGGTTATTGAAAATAACTATTCATTTATACGGAGGGTTGGCCGAGTGGTCTAAGGCGGCAGACTTAAGATCTGTTGGACGGTTGTCCGCGCGAGTTCGAACCTCGCATCCTTCAGTAATATTTTTTTAATATACATTTTCTCTGCCATCATGGCTTAAAAAATGCTTAAAAGAAGGGAATTAGGGGGGATGGATGAACTAAGACATAACTTTCTTTTCTTCAATTCGAACTCTGTTGGGAAGAGTTGCTTTAAAAAAGACTCTCTATCCATCTATAAAATTTATTAAAACTTTTGAACTGCACAGAATGATTGGCTCACTTAGAAACAAATTTGAGCATTTCAAAGT…	CGGATGGCCAAGAGAATAGATTCCTACATCGATGAGATGACAACTTGATAAGGCAGGGCAGGTCTAAAAGGCTATTGCTCTTTCCATTTTTTTTTTCCTATCGATTTTACTACTAGAAATTTTTGCTACCCATACCCATTCTCGCATTGCAACATGGAAAAACTGAAAATTGAAAAAAAAGGTATTGAAATTTCAACTGTATTGTGTAAATCATTTTTGGGCAAACTAGACACAATAACTAGCGAACAGAAAAATGGATAGAACGTGGCTATTACTGACGTGGCTGTTGCTACTCTGTGGGGTAGTTCAAGGGAACCAAGAAAGCATAAATCAAAAATATCACGATGTCTGTTCAGGGATGTATTCCAAGGAGGATTTCAATGGAAAAGTTGACCCCTA…
721	1827	3	3	5	5	NC_001134	347518	349584	NC_001136	148882	150227	|gene |tRNA note= GO_component: cytosol [goid 0005829] [evidence NAS] |gene |CDS[fcd=-674](+,347877,349382) note= Ybr056wp;	|gene |CDS(+,148192,149079) note= Ydl173wp; |gene gene= GLT1 |CDS(-,149204,155641) gene= GLT1 note= Glt1p;	CGGAGGAGCTACTAAAGAAAGAGTGCTGCAATTAATACAATTAATATAAGTGTGGTTATTGAAAATAACTATTCATTTATACGGAGGGTTGGCCGAGTGGTCTAAGGCGGCAGACTTAAGATCTGTTGGACGGTTGTCCGCGCGAGTTCGAACCTCGCATCCTTCAGTAATATTTTTTTAATATACATTTTCTCTGCCATCATGGCTTAAAAAATGCTTAAAAGAAGGGAATTAGGGGGGATGGATGAACTAAGACATAACTTTCTTTTCTTCAATTCGAACTCTGTTGGGAAGAGTTGCTTTAAAAAAGACTCTCTATCCATCTATAAAATTTATTAAAACTTTTGAACTGCACAGAATGATTGGCTCACTTAGAAACAAATTTGAGCATTTCAAAGT…	CGGAAAAATTTGCTATTGGAAGAGGTGGCGCTGGAAACATAATTTCTCCAAAGTCAAGCAGGAACACTATCAACCATAACTTAAACGATGATGATGAAGATAAGTTTAATTTGAAAGATGACAATGGTAAAGAGAAGAAGAAGAAGAAGAAGAAGAAATCAGGGTTTTTCAGTTCTTTGAAAACTATGTTTAATTGAAATAACATTCATCAGCAAAATTAATAAACTAAATAAAATAAATAAATAAATAAATAAATAAATAAATAAATAAATAAATAAATAAATAATATACGATCATAAAATAAATAATAACTCAAGCTTTTTAGACTTGACTAGCTAATTCTTTCAATAGTTTGTAATCACGTTGAACGATACCACCATTACTTGGTAGATACGTAGT…
721	1821	56	56	0	0	NC_001134	347518	349584	NC_001136	145877	146740	|gene |tRNA note= GO_component: cytosol [goid 0005829] [evidence NAS] |gene |CDS[fcd=-674](+,347877,349382) note= Ybr056wp;	|gene gene= DLD1 |CDS[fcd=1282](-,145827,147590) gene= DLD1 note= Dld1p;	CGGAGGAGCTACTAAAGAAAGAGTGCTGCAATTAATACAATTAATATAAGTGTGGTTATTGAAAATAACTATTCATTTATACGGAGGGTTGGCCGAGTGGTCTAAGGCGGCAGACTTAAGATCTGTTGGACGGTTGTCCGCGCGAGTTCGAACCTCGCATCCTTCAGTAATATTTTTTTAATATACATTTTCTCTGCCATCATGGCTTAAAAAATGCTTAAAAGAAGGGAATTAGGGGGGATGGATGAACTAAGACATAACTTTCTTTTCTTCAATTCGAACTCTGTTGGGAAGAGTTGCTTTAAAAAAGACTCTCTATCCATCTATAAAATTTATTAAAACTTTTGAACTGCACAGAATGATTGGCTCACTTAGAAACAAATTTGAGCATTTCAAAGT…	CGGGTTCATGATTCTCTTTGGGTCAATAGCTAGCTTAATCTTTCTCATCAAATCGACGGGTGCTTCACCTAATTCTTCGAGCAAGTACTCTCTTTTACCAATACCAACACCGTGTTCACCCGTGCAAGTGCCTTCTGCGTTCAGTGCTCTCTTGACCATTCTGTCAACAAGTTGGCTACAGGTTTCGTGTTCTTCAGGGGTTCTGTAGACGATGAATGCATGGAAGTTACCATCACCTGCATGACCAACAATGGCGTTGATCAGCTTACTAGCTTGCATGTCCTTTTTAGTTTCGTGAATAACCTTGTCGAACTGCGACACAGGAACAGCTACATCAGTTGTCCAAATTTTAGCTGATTTGTCTTTGCTCTTATCAGCGTCTAGCACAGACCATAGCGC…
721	1338	6	6	0	0	NC_001134	347518	349584	NC_001135	60136	60286	|gene |tRNA note= GO_component: cytosol [goid 0005829] [evidence NAS] |gene |CDS[fcd=-674](+,347877,349382) note= Ybr056wp;	|gene gene= GFD2 |CDS[fcd=-1185](+,59026,60726) gene= GFD2 note= Gfd2p;	CGGAGGAGCTACTAAAGAAAGAGTGCTGCAATTAATACAATTAATATAAGTGTGGTTATTGAAAATAACTATTCATTTATACGGAGGGTTGGCCGAGTGGTCTAAGGCGGCAGACTTAAGATCTGTTGGACGGTTGTCCGCGCGAGTTCGAACCTCGCATCCTTCAGTAATATTTTTTTAATATACATTTTCTCTGCCATCATGGCTTAAAAAATGCTTAAAAGAAGGGAATTAGGGGGGATGGATGAACTAAGACATAACTTTCTTTTCTTCAATTCGAACTCTGTTGGGAAGAGTTGCTTTAAAAAAGACTCTCTATCCATCTATAAAATTTATTAAAACTTTTGAACTGCACAGAATGATTGGCTCACTTAGAAACAAATTTGAGCATTTCAAAGT…	CGGTGACCGAAGAAGACAAGACATGGTCAAGGGCATTTGTTGGTCATCACGTGAGCGGGGATCTTAAGTGGCTGGAGACTATTGGTGTCAAATTCCCTGGCAGAGGGTATGAAGGCCATCTGGACCATACGCTGCTTTTGGCTGAAACTC
721	6362	11	11	0	0	NC_001134	347518	349584	NC_001141	122277	122316	|gene |tRNA note= GO_component: cytosol [goid 0005829] [evidence NAS] |gene |CDS[fcd=-674](+,347877,349382) note= Ybr056wp;	|neigh_up CDS[fcd=-4304](+,117992,122071) gene= STH1 note= Sth1p; |neigh_down CDS[fcd=393](+,122689,125733) gene= KGD1 note= Kgd1p;	CGGAGGAGCTACTAAAGAAAGAGTGCTGCAATTAATACAATTAATATAAGTGTGGTTATTGAAAATAACTATTCATTTATACGGAGGGTTGGCCGAGTGGTCTAAGGCGGCAGACTTAAGATCTGTTGGACGGTTGTCCGCGCGAGTTCGAACCTCGCATCCTTCAGTAATATTTTTTTAATATACATTTTCTCTGCCATCATGGCTTAAAAAATGCTTAAAAGAAGGGAATTAGGGGGGATGGATGAACTAAGACATAACTTTCTTTTCTTCAATTCGAACTCTGTTGGGAAGAGTTGCTTTAAAAAAGACTCTCTATCCATCTATAAAATTTATTAAAACTTTTGAACTGCACAGAATGATTGGCTCACTTAGAAACAAATTTGAGCATTTCAAAGT…	CGGCGGCGATGGACCAGTTAGCTTCGACCGTTTGCGATT
721	10674	224	224	0	0	NC_001134	347518	349584	NC_001146	19448	19814	|gene |tRNA note= GO_component: cytosol [goid 0005829] [evidence NAS] |gene |CDS[fcd=-674](+,347877,349382) note= Ybr056wp;	|gene gene= PEX6 note= synonym: PAS8 |CDS[fcd=3002](-,19541,22633) gene= PEX6 note= Pex6p;	CGGAGGAGCTACTAAAGAAAGAGTGCTGCAATTAATACAATTAATATAAGTGTGGTTATTGAAAATAACTATTCATTTATACGGAGGGTTGGCCGAGTGGTCTAAGGCGGCAGACTTAAGATCTGTTGGACGGTTGTCCGCGCGAGTTCGAACCTCGCATCCTTCAGTAATATTTTTTTAATATACATTTTCTCTGCCATCATGGCTTAAAAAATGCTTAAAAGAAGGGAATTAGGGGGGATGGATGAACTAAGACATAACTTTCTTTTCTTCAATTCGAACTCTGTTGGGAAGAGTTGCTTTAAAAAAGACTCTCTATCCATCTATAAAATTTATTAAAACTTTTGAACTGCACAGAATGATTGGCTCACTTAGAAACAAATTTGAGCATTTCAAAGT…	CGGGGAGGGTAAGTAAATAAAAAGATAAATTTCAAGGCAAAATATGGGACATATATTTACAAATTTACCTATACGCTCTGAGTTGATATTACTTAAGCACCTTCAAAATTAGCTCTCACCGCTTCATAATGATTCAGTTCAGCCCGCGACACACTTGGGGTGAGCTGCTCTTGTGCTTTCAAGAAGTCTTCCATTTTTACGACAACCTTAGTATCCTCTTTTGTCGCAATCTTATCAAACCAGCGACGTGTAGAAATATTCTCTCCCGTCAATTCGTTATGCTGAGAAACTTTTTTTTCTACCATGCGTGCAATTCTTGACATGGCGTTAAGCATTGCATCTGAGCAGAGAGCATAAAAATCTGCC
721	13399	36	36	0	0	NC_001134	347518	349584	NC_001148	518738	519443	|gene |tRNA note= GO_component: cytosol [goid 0005829] [evidence NAS] |gene |CDS[fcd=-674](+,347877,349382) note= Ybr056wp;	|gene gene= CTF19 note= synonym: MCM18 |CDS(+,517649,518758) gene= CTF19 note= Ctf19p; |gene gene= IRC15 |CDS(-,518732,520231) gene= IRC15 note= Irc15p;	CGGAGGAGCTACTAAAGAAAGAGTGCTGCAATTAATACAATTAATATAAGTGTGGTTATTGAAAATAACTATTCATTTATACGGAGGGTTGGCCGAGTGGTCTAAGGCGGCAGACTTAAGATCTGTTGGACGGTTGTCCGCGCGAGTTCGAACCTCGCATCCTTCAGTAATATTTTTTTAATATACATTTTCTCTGCCATCATGGCTTAAAAAATGCTTAAAAGAAGGGAATTAGGGGGGATGGATGAACTAAGACATAACTTTCTTTTCTTCAATTCGAACTCTGTTGGGAAGAGTTGCTTTAAAAAAGACTCTCTATCCATCTATAAAATTTATTAAAACTTTTGAACTGCACAGAATGATTGGCTCACTTAGAAACAAATTTGAGCATTTCAAAGT…	CGGACATGTACGCCAGGTGATGTTCCATTTGCCATTGCCAACTGGACGGCTTGCTTAAACGATTCCGATAAGCTCGGATGAGGGAACGGTACTTTACAGACATCATGGGCGGTAAGGCCAAGCGACACCGCCATCGATGCTTGCGACAGCAATTCATTTGCATCGTCGTTTATCATATGAACGCCTAGTATTTTCATGTCACGAGAATCTATCAGAACTTTAATGAAAGGAGAAACTGTAGTATTCTCTTCCCGTGGTAATAACGTGTTATATCTAACGTTCTGTGAGAACAAAACCCTGCCTTTTTGATATGGGATGCGAGCCTTTGCCAACCCCTCCTCAGTGTATCCGACCCAGCCAATCTGAGGCTGACAGTACAGCACATTTGGTGGGAAGCCA…
721	361	4	4	0	0	NC_001134	347518	349584	NC_001134	61806	62809	|gene |tRNA note= GO_component: cytosol [goid 0005829] [evidence NAS] |gene |CDS[fcd=-674](+,347877,349382) note= Ybr056wp;	|gene |CDS[fcd=292](-,61199,62599) note= Ybl086cp;	CGGAGGAGCTACTAAAGAAAGAGTGCTGCAATTAATACAATTAATATAAGTGTGGTTATTGAAAATAACTATTCATTTATACGGAGGGTTGGCCGAGTGGTCTAAGGCGGCAGACTTAAGATCTGTTGGACGGTTGTCCGCGCGAGTTCGAACCTCGCATCCTTCAGTAATATTTTTTTAATATACATTTTCTCTGCCATCATGGCTTAAAAAATGCTTAAAAGAAGGGAATTAGGGGGGATGGATGAACTAAGACATAACTTTCTTTTCTTCAATTCGAACTCTGTTGGGAAGAGTTGCTTTAAAAAAGACTCTCTATCCATCTATAAAATTTATTAAAACTTTTGAACTGCACAGAATGATTGGCTCACTTAGAAACAAATTTGAGCATTTCAAAGT…	CGGGTTTCGCTACAGTTGTTCCAATACCGTTAAAATTGGAGAATGTATTCTTGGGTGACATCTGGTTTGTTGTTGATGTGGGGCTAGATAGTTCAGACGTGTTATCCAGTATAGTATTTATTCCTGGCCTGTAATTAGCGAGCTGGCCATTAGTAAACGATTTGGAAATGTTGAAATCTTCGTAAGAGCCTCTAACTAGCTTCAACTGCAATGAGACGTTGATTATAGAATTGACCTTTGAGTGCTTTAGGAGAAATCTGTTTGTTGTGGGAGTTTCGTCTTCTTTGACGTATTCTGTTATATCTATGTCTACTGTTCCCAATAGAAGTTTACCCGTTATCTTTTGAGAATATGAATTGTTTCCTGTGGCCGTTAGTGCAGTGGCGTTAGCATAGGTCG…
721	5681	1	1	0	0	NC_001134	347518	349584	NC_001140	96235	96507	|gene |tRNA note= GO_component: cytosol [goid 0005829] [evidence NAS] |gene |CDS[fcd=-674](+,347877,349382) note= Ybr056wp;	|gene gene= STE20 |CDS[fcd=1562](-,95114,97933) gene= STE20 note= Ste20p;	CGGAGGAGCTACTAAAGAAAGAGTGCTGCAATTAATACAATTAATATAAGTGTGGTTATTGAAAATAACTATTCATTTATACGGAGGGTTGGCCGAGTGGTCTAAGGCGGCAGACTTAAGATCTGTTGGACGGTTGTCCGCGCGAGTTCGAACCTCGCATCCTTCAGTAATATTTTTTTAATATACATTTTCTCTGCCATCATGGCTTAAAAAATGCTTAAAAGAAGGGAATTAGGGGGGATGGATGAACTAAGACATAACTTTCTTTTCTTCAATTCGAACTCTGTTGGGAAGAGTTGCTTTAAAAAAGACTCTCTATCCATCTATAAAATTTATTAAAACTTTTGAACTGCACAGAATGATTGGCTCACTTAGAAACAAATTTGAGCATTTCAAAGT…	CGGCGCTTTTGGCGATTGAGCAACTTGCTGTGGTGTGTGAGCTGTGGAGATGATTGGAGACGTTTTGGATTTGGTTGGAGGTATTGGTGGTAGTGGCTGCTCCTCTTTTTTTAAAGTGGCATTTCTTGATATTGAGGACCTGTTTGGGCTGGTCCTGTTCGGAGTTGTAGGTGCATGAGTCTGCTTCAAGGGCGAAACATTGGCGGCAGAATTCATGACGGGTGATTTTATAATTGGAGCTGAAGCGGACGCAGAAGATGGGGGCTTAGGAG
721	4266	269	269	0	0	NC_001134	347518	349584	NC_001138	202273	202884	|gene |tRNA note= GO_component: cytosol [goid 0005829] [evidence NAS] |gene |CDS[fcd=-674](+,347877,349382) note= Ybr056wp;	|gene gene= LSB3 note= synonym: YFR024C gene= LSB3 note= Lsb3p; |neigh_up CDS[fcd=-2716](+,199862,201697) gene= PES4 note= Pes4p; |neigh_down CDS[fcd=2160](-,203731,204738) gene= HIS2 note= His2p;	CGGAGGAGCTACTAAAGAAAGAGTGCTGCAATTAATACAATTAATATAAGTGTGGTTATTGAAAATAACTATTCATTTATACGGAGGGTTGGCCGAGTGGTCTAAGGCGGCAGACTTAAGATCTGTTGGACGGTTGTCCGCGCGAGTTCGAACCTCGCATCCTTCAGTAATATTTTTTTAATATACATTTTCTCTGCCATCATGGCTTAAAAAATGCTTAAAAGAAGGGAATTAGGGGGGATGGATGAACTAAGACATAACTTTCTTTTCTTCAATTCGAACTCTGTTGGGAAGAGTTGCTTTAAAAAAGACTCTCTATCCATCTATAAAATTTATTAAAACTTTTGAACTGCACAGAATGATTGGCTCACTTAGAAACAAATTTGAGCATTTCAAAGT…	CGGATTCATAATCATCATCATAATCATCGTATTCATCATCAGCCCAACGATTTCTTGAAGAACGAGCCCTTGACTGAGCAGTTCCTGATCTTCTGTGGCTGGCATAATAACTTGAAGCTCCAGATGGGTCATCCAATTTACCACCACTACCGCCACTGTTGGTAGGAGCCAGTCTTGAATTCCTTGAATAGCCAGTACCATAATCATCATCGTCATCATCATCGTCGAACGTATAACGAGAACCGCTTTGGGCTCTTCTCCTTGTGGATCTTGTGTTAGGTCTAGTGGAGGAAGCATCTGTAGAACTGAATGAACTAGGAATGTCATTATAGTAATCGTCGTCGTCATAGTAATCGTCTTCGTCGTCATCGAAACTGCCACGACCACCGTTGGAGGGTC…
721	2036	204	204	0	0	NC_001134	347518	349584	NC_001136	344639	344886	|gene |tRNA note= GO_component: cytosol [goid 0005829] [evidence NAS] |gene |CDS[fcd=-674](+,347877,349382) note= Ybr056wp;	|gene gene= RAD59 |CDS[fcd=191](-,344237,344953) gene= RAD59 note= Rad59p;	CGGAGGAGCTACTAAAGAAAGAGTGCTGCAATTAATACAATTAATATAAGTGTGGTTATTGAAAATAACTATTCATTTATACGGAGGGTTGGCCGAGTGGTCTAAGGCGGCAGACTTAAGATCTGTTGGACGGTTGTCCGCGCGAGTTCGAACCTCGCATCCTTCAGTAATATTTTTTTAATATACATTTTCTCTGCCATCATGGCTTAAAAAATGCTTAAAAGAAGGGAATTAGGGGGGATGGATGAACTAAGACATAACTTTCTTTTCTTCAATTCGAACTCTGTTGGGAAGAGTTGCTTTAAAAAAGACTCTCTATCCATCTATAAAATTTATTAAAACTTTTGAACTGCACAGAATGATTGGCTCACTTAGAAACAAATTTGAGCATTTCAAAGT…	CGGGCCTCAACATCTATAACATCCATTCGCCAACCATCATACCCGAATGTTTCATTAGCGAACTGAATGAGAGCATGCCCTGGTATCAGCTTAGATAAGTTGTGCTTCCCATATTTATTATTGTGGTAAATATTGTACGTGTACCTTTCGATCTTGGACTGTAGAAGCCCAATCCTCTGCACCGACCAAGCGCTGGCAGGTCTTCCATTCCAATCTTCGATGATTTGGAACTCTTTTATATCCAAGC
721	2037	7	7	0	0	NC_001134	347518	349584	NC_001136	344887	345311	|gene |tRNA note= GO_component: cytosol [goid 0005829] [evidence NAS] |gene |CDS[fcd=-674](+,347877,349382) note= Ybr056wp;	|gene gene= RAD59 |CDS[fcd=-146](-,344237,344953) gene= RAD59 note= Rad59p;	CGGAGGAGCTACTAAAGAAAGAGTGCTGCAATTAATACAATTAATATAAGTGTGGTTATTGAAAATAACTATTCATTTATACGGAGGGTTGGCCGAGTGGTCTAAGGCGGCAGACTTAAGATCTGTTGGACGGTTGTCCGCGCGAGTTCGAACCTCGCATCCTTCAGTAATATTTTTTTAATATACATTTTCTCTGCCATCATGGCTTAAAAAATGCTTAAAAGAAGGGAATTAGGGGGGATGGATGAACTAAGACATAACTTTCTTTTCTTCAATTCGAACTCTGTTGGGAAGAGTTGCTTTAAAAAAGACTCTCTATCCATCTATAAAATTTATTAAAACTTTTGAACTGCACAGAATGATTGGCTCACTTAGAAACAAATTTGAGCATTTCAAAGT…	CGGTGCTGTGCCGTATGTAGTCGAATCATACGATATGCTCGAACTGGGCTTCGCTTGTATCGTCATTATTTTGTCTGTTTATCCTGAAATATGCTCTTCTCCTCTACGTAACCCTTTAATGGTCCAAAGCATGTGCTAAACTGCCACAGACTCCCTCAATGATGTTCTTATCCTTCCTTGCCGTTACTGCTTCCTATCATATCTGCCCTTGCCAAACTGTGGCTTCCTCTAATCAATTTGCCCCAGTACATTGAAAAGCACGTGACGTGACACCAACTTGAAAGACATTAGTGTCCAACGCGATATAATGGTCAATAAAATACCCAATTTTATCAAGTGAACATGATATTATTCAATACTATAGTACTTTAAAGAAAACTTCAACAAGTTGCTTCATTG…
721	9213	4	4	0	0	NC_001134	347518	349584	NC_001144	737744	737894	|gene |tRNA note= GO_component: cytosol [goid 0005829] [evidence NAS] |gene |CDS[fcd=-674](+,347877,349382) note= Ybr056wp;	|neigh_up CDS[fcd=-269](-,735214,737550) gene= ACO1 note= Aco1p; |neigh_down CDS[fcd=6046](-,738163,743865) gene= STT4 note= Stt4p;	CGGAGGAGCTACTAAAGAAAGAGTGCTGCAATTAATACAATTAATATAAGTGTGGTTATTGAAAATAACTATTCATTTATACGGAGGGTTGGCCGAGTGGTCTAAGGCGGCAGACTTAAGATCTGTTGGACGGTTGTCCGCGCGAGTTCGAACCTCGCATCCTTCAGTAATATTTTTTTAATATACATTTTCTCTGCCATCATGGCTTAAAAAATGCTTAAAAGAAGGGAATTAGGGGGGATGGATGAACTAAGACATAACTTTCTTTTCTTCAATTCGAACTCTGTTGGGAAGAGTTGCTTTAAAAAAGACTCTCTATCCATCTATAAAATTTATTAAAACTTTTGAACTGCACAGAATGATTGGCTCACTTAGAAACAAATTTGAGCATTTCAAAGT…	CGGCAGCGATTGGAGGTTTGATGGTTAAAGTCGCCTGCGGAGAACAACTGAAGGGTTCAAATTTTTCTCGTATGCACTAATTTCTCTATTGATTGGTCAGGACCTTTGCCGATTTCGGCGCCGAAATGCTCGAAAAACAAAGGGTATTGC
721	3399	455	455	6	6	NC_001134	347518	349584	NC_001137	64005	64315	|gene |tRNA note= GO_component: cytosol [goid 0005829] [evidence NAS] |gene |CDS[fcd=-674](+,347877,349382) note= Ybr056wp;	|gene gene= PAU2 |CDS[fcd=-432](+,63728,64090) gene= PAU2 note= Pau2p;	CGGAGGAGCTACTAAAGAAAGAGTGCTGCAATTAATACAATTAATATAAGTGTGGTTATTGAAAATAACTATTCATTTATACGGAGGGTTGGCCGAGTGGTCTAAGGCGGCAGACTTAAGATCTGTTGGACGGTTGTCCGCGCGAGTTCGAACCTCGCATCCTTCAGTAATATTTTTTTAATATACATTTTCTCTGCCATCATGGCTTAAAAAATGCTTAAAAGAAGGGAATTAGGGGGGATGGATGAACTAAGACATAACTTTCTTTTCTTCAATTCGAACTCTGTTGGGAAGAGTTGCTTTAAAAAAGACTCTCTATCCATCTATAAAATTTATTAAAACTTTTGAACTGCACAGAATGATTGGCTCACTTAGAAACAAATTTGAGCATTTCAAAGT…	CGGTGTTCCATGGTACTCCAGCAGATTAAAGCCAGCCATTTCCAGTGCTCTATCCAAGGACGGTATCTACACTATCGCAAACTAGAGACAAACGCCAATTTAATGAAGGAAATGCTATGAAACTTAGATAATGAAATAAAAAAAAACCCTTTTTTTTTTTTTGGTAGTATAAATATCTTTATACGTACATACGTGAACAATCACATCATATCTGTCAATTCTCGTTGTAACCATAACCTAGCACTTATTTCAGACTTTCCAAAGGTCGCAGTATCTTTATGACGAGCCATCCCATGTAAAAATTGCCGTG
721	9204	10	10	0	0	NC_001134	347518	349584	NC_001144	730646	730709	|gene |tRNA note= GO_component: cytosol [goid 0005829] [evidence NAS] |gene |CDS[fcd=-674](+,347877,349382) note= Ybr056wp;	|neigh_up CDS[fcd=-1720](+,728957,730303) gene= EXG1 note= Exg1p; |neigh_down CDS[fcd=150](+,730827,731561) note= Ylr301wp;	CGGAGGAGCTACTAAAGAAAGAGTGCTGCAATTAATACAATTAATATAAGTGTGGTTATTGAAAATAACTATTCATTTATACGGAGGGTTGGCCGAGTGGTCTAAGGCGGCAGACTTAAGATCTGTTGGACGGTTGTCCGCGCGAGTTCGAACCTCGCATCCTTCAGTAATATTTTTTTAATATACATTTTCTCTGCCATCATGGCTTAAAAAATGCTTAAAAGAAGGGAATTAGGGGGGATGGATGAACTAAGACATAACTTTCTTTTCTTCAATTCGAACTCTGTTGGGAAGAGTTGCTTTAAAAAAGACTCTCTATCCATCTATAAAATTTATTAAAACTTTTGAACTGCACAGAATGATTGGCTCACTTAGAAACAAATTTGAGCATTTCAAAGT…	CGGCATACGTTCCGTTCCGTGTCGTCTTGCATAAAATTTCCGAATCACATGTTCGTAAAACAA
721	4281	206	279	1	3943	NC_001134	347518	349584	NC_001138	210611	211255	|gene |tRNA note= GO_component: cytosol [goid 0005829] [evidence NAS] |gene |CDS[fcd=-674](+,347877,349382) note= Ybr056wp;	|gene gene= SUP6 gene= SUP6 note= GO_component: cytosol [goid 0005829] [evidence NAS] |gene gene= PTR3 note= synonym: SSY3 |CDS[fcd=-8](+,210925,212961) gene= PTR3 note= Ptr3p;	CGGAGGAGCTACTAAAGAAAGAGTGCTGCAATTAATACAATTAATATAAGTGTGGTTATTGAAAATAACTATTCATTTATACGGAGGGTTGGCCGAGTGGTCTAAGGCGGCAGACTTAAGATCTGTTGGACGGTTGTCCGCGCGAGTTCGAACCTCGCATCCTTCAGTAATATTTTTTTAATATACATTTTCTCTGCCATCATGGCTTAAAAAATGCTTAAAAGAAGGGAATTAGGGGGGATGGATGAACTAAGACATAACTTTCTTTTCTTCAATTCGAACTCTGTTGGGAAGAGTTGCTTTAAAAAAGACTCTCTATCCATCTATAAAATTTATTAAAACTTTTGAACTGCACAGAATGATTGGCTCACTTAGAAACAAATTTGAGCATTTCAAAGT…	CGGGGGCGAGTCGAACGCCCGATCTCAAGATTTCGTAGTGGTAAATTACAGTCTTGCGCCTTAAACCAACTTGGCTACCGAGAGTCGTTTTTGTTGATTACTTTGCTATATAAAGATTCCTTTATCATTATTTCATGAGGCGCACTTTTGATTTTCACACCTTTTTCAAGCGGAGGAGTTATTCGTCTTATTAACATTACCATTACAGTAGTCATCAATGATTACCTTATCAGCACTGAAAAGATACCCGTAAAATTTAGCACACGCACACTCACACATACATAGGTACGAAATACACAACTGATAGGCGTTCATGCACTCTCATAGACAAAAGTGGGGCCGCCAGACGGATATAGCGAGGGTGCTCGACGATATAGAACACGACCTCTATCTACCGCA…
721	4761	1789	1789	0	0	NC_001134	347518	349584	NC_001139	368657	368971	|gene |tRNA note= GO_component: cytosol [goid 0005829] [evidence NAS] |gene |CDS[fcd=-674](+,347877,349382) note= Ybr056wp;	|gene gene= HSF1 note= synonyms: MAS3, EXA3 |CDS[fcd=-58](+,368756,371257) gene= HSF1 note= Hsf1p;	CGGAGGAGCTACTAAAGAAAGAGTGCTGCAATTAATACAATTAATATAAGTGTGGTTATTGAAAATAACTATTCATTTATACGGAGGGTTGGCCGAGTGGTCTAAGGCGGCAGACTTAAGATCTGTTGGACGGTTGTCCGCGCGAGTTCGAACCTCGCATCCTTCAGTAATATTTTTTTAATATACATTTTCTCTGCCATCATGGCTTAAAAAATGCTTAAAAGAAGGGAATTAGGGGGGATGGATGAACTAAGACATAACTTTCTTTTCTTCAATTCGAACTCTGTTGGGAAGAGTTGCTTTAAAAAAGACTCTCTATCCATCTATAAAATTTATTAAAACTTTTGAACTGCACAGAATGATTGGCTCACTTAGAAACAAATTTGAGCATTTCAAAGT…	CGGTAGATAAAGGCAAAGAGTTAGAGGTGTGCTTTACGAACAGCGCTGGAAGGGAAAGGAAACAAAAAAGACAAAAAGACAGCTGTATTGTTGGCGCCATGAATAATGCTGCAAATACAGGGACGACCAATGAGTCAAACGTGAGCGATGCTCCCCGTATTGAGCCTTTACCAAGCTTGAATGATGATGACATTGAAAAAATCTTACAACCGAACGATATCTTTACGACCGATCGTACCGATGCAAGTACTACATCTTCCACAGCCATTGAAGATATTATTAACCCCTCATTGGATCCGCAGTCAGCAGCATCG
721	12532	1	1	0	0	NC_001134	347518	349584	NC_001147	825870	826005	|gene |tRNA note= GO_component: cytosol [goid 0005829] [evidence NAS] |gene |CDS[fcd=-674](+,347877,349382) note= Ybr056wp;	|gene |CDS[fcd=-6](-,825533,825931) note= Yor268cp;	CGGAGGAGCTACTAAAGAAAGAGTGCTGCAATTAATACAATTAATATAAGTGTGGTTATTGAAAATAACTATTCATTTATACGGAGGGTTGGCCGAGTGGTCTAAGGCGGCAGACTTAAGATCTGTTGGACGGTTGTCCGCGCGAGTTCGAACCTCGCATCCTTCAGTAATATTTTTTTAATATACATTTTCTCTGCCATCATGGCTTAAAAAATGCTTAAAAGAAGGGAATTAGGGGGGATGGATGAACTAAGACATAACTTTCTTTTCTTCAATTCGAACTCTGTTGGGAAGAGTTGCTTTAAAAAAGACTCTCTATCCATCTATAAAATTTATTAAAACTTTTGAACTGCACAGAATGATTGGCTCACTTAGAAACAAATTTGAGCATTTCAAAGT…	CGGCTTCTAGAAAACTGGAAAAACCATAAGAAAAAAATGGGAAGGGGAAAACAAAAACCATTCAGGTCTTGCGTGCCGAGAATTTTTTTTTTCTCTTTTTCGTTGTCAACTTTTGCAGTAGCAGCCGCTGGCGAC
721	5853	2	2	10	10	NC_001134	347518	349584	NC_001140	219186	219621	|gene |tRNA note= GO_component: cytosol [goid 0005829] [evidence NAS] |gene |CDS[fcd=-674](+,347877,349382) note= Ybr056wp;	|gene gene= MED6 |CDS[fcd=483](-,218999,219886) gene= MED6 note= Med6p;	CGGAGGAGCTACTAAAGAAAGAGTGCTGCAATTAATACAATTAATATAAGTGTGGTTATTGAAAATAACTATTCATTTATACGGAGGGTTGGCCGAGTGGTCTAAGGCGGCAGACTTAAGATCTGTTGGACGGTTGTCCGCGCGAGTTCGAACCTCGCATCCTTCAGTAATATTTTTTTAATATACATTTTCTCTGCCATCATGGCTTAAAAAATGCTTAAAAGAAGGGAATTAGGGGGGATGGATGAACTAAGACATAACTTTCTTTTCTTCAATTCGAACTCTGTTGGGAAGAGTTGCTTTAAAAAAGACTCTCTATCCATCTATAAAATTTATTAAAACTTTTGAACTGCACAGAATGATTGGCTCACTTAGAAACAAATTTGAGCATTTCAAAGT…	CGGTAGGTCGTACACTGCTCTTGTTACTGCCCCCTCCAGCGTTGTTCCCGTTGGTGGCAGCCGTTGCAGTCGTGCTAGTGTCCGTAGGTACTTTATAGTGTACTCCTTGGGAAGGTTGAAACTCAATCAAGTCATACAAGCTCTCCAATGTGCTATTTAGATGGTAGCTCGTGGACATCAGCCTACTTTGCACAATTTTAAAAATTGTTGGCGATTGGTAAATGTTTGCACCAATTATGTAGTAGTCTTGCAATGGAATAATCTCTGGTCCCTTAGCGCTTCCCACACCAGAATTGTTTGTTCGTCTTTGCTTCCTGATAACCCAGAAGTCAGGCTCTCTTACGCTGCTCAATACGTATTCAGTACCATCTAACTTCATTAATTCCTCCTCCAGTTGCA…
721	13503	1	1	0	0	NC_001134	347518	349584	NC_001148	613661	614664	|gene |tRNA note= GO_component: cytosol [goid 0005829] [evidence NAS] |gene |CDS[fcd=-674](+,347877,349382) note= Ybr056wp;	|gene gene= CCL1 |CDS[fcd=393](-,613374,614555) gene= CCL1 note= Ccl1p;	CGGAGGAGCTACTAAAGAAAGAGTGCTGCAATTAATACAATTAATATAAGTGTGGTTATTGAAAATAACTATTCATTTATACGGAGGGTTGGCCGAGTGGTCTAAGGCGGCAGACTTAAGATCTGTTGGACGGTTGTCCGCGCGAGTTCGAACCTCGCATCCTTCAGTAATATTTTTTTAATATACATTTTCTCTGCCATCATGGCTTAAAAAATGCTTAAAAGAAGGGAATTAGGGGGGATGGATGAACTAAGACATAACTTTCTTTTCTTCAATTCGAACTCTGTTGGGAAGAGTTGCTTTAAAAAAGACTCTCTATCCATCTATAAAATTTATTAAAACTTTTGAACTGCACAGAATGATTGGCTCACTTAGAAACAAATTTGAGCATTTCAAAGT…	CGGTACTGATTCCTGGCTACCTTCTCTGCTGGGAAATTTTGTTTCTAAATACCTTGTGACCAAGGCTTCATCCTCAATCAATAATGTTGCTAGTGTTATTTGGGGTGGAGTGTAGAAATATACGACATCGGTTAATAATGCGGCAGTTATTCTCTTCTTACACCTATCGTATATTTGGCCCATGTAATTTAAATCAACCTTACCATAAAGGACGTTCTGGATATCTAAGAAAAACCCATGAAGCGGTTTGTAAGGATGATGGTTCAACAGTGAAAATTTCAATGATTCTAACAACTTAAACTCGAATTTGAGAACACTATCTCTAGTAGATTTGGCCTTTTGAGCAAACGAGTCCACGCTAATAAAATAGTTCTCCGATTTGCAGGCTAGAAAGATAGT…
721	13502	48	48	0	0	NC_001134	347518	349584	NC_001148	613303	613660	|gene |tRNA note= GO_component: cytosol [goid 0005829] [evidence NAS] |gene |CDS[fcd=-674](+,347877,349382) note= Ybr056wp;	|gene gene= CCL1 |CDS[fcd=1074](-,613374,614555) gene= CCL1 note= Ccl1p;	CGGAGGAGCTACTAAAGAAAGAGTGCTGCAATTAATACAATTAATATAAGTGTGGTTATTGAAAATAACTATTCATTTATACGGAGGGTTGGCCGAGTGGTCTAAGGCGGCAGACTTAAGATCTGTTGGACGGTTGTCCGCGCGAGTTCGAACCTCGCATCCTTCAGTAATATTTTTTTAATATACATTTTCTCTGCCATCATGGCTTAAAAAATGCTTAAAAGAAGGGAATTAGGGGGGATGGATGAACTAAGACATAACTTTCTTTTCTTCAATTCGAACTCTGTTGGGAAGAGTTGCTTTAAAAAAGACTCTCTATCCATCTATAAAATTTATTAAAACTTTTGAACTGCACAGAATGATTGGCTCACTTAGAAACAAATTTGAGCATTTCAAAGT…	CGGTCTATATACCTATGCATCTTAATCTATATATATATATAAAACAGAAACCTACGGTAACAGAGCTGTTTCATGTTTTTTGCTTTTTCTCAACGGTGGACGAAGTATCTTCTCCATTCAACTTCCTTTTTAATTTCTGAATCAGTGTTGATGGATTTTGACAATAATAGTTTTTTGCCGCAATTTTCTTGGCCTCTTCAGTACTCGGAGGTTTACAATCTTCAATAATACTTTTACACTCGCGTATTATGGTTAGTAACTTCGCGGAGTCTATCGAATATTCTTCGCTCTCTGTGGACTTCTCTTTGTTTTTCTCAGTTGTACTGGCATCATTTTGTGGTTCTTCTTTTTCGTTTC
721	6162	65	65	0	0	NC_001134	347518	349584	NC_001140	509760	510530	|gene |tRNA note= GO_component: cytosol [goid 0005829] [evidence NAS] |gene |CDS[fcd=-674](+,347877,349382) note= Ybr056wp;	|gene gene= SCH9 note= synonym: KOM1 |CDS[fcd=-782](+,509363,511837) gene= SCH9 note= Sch9p;	CGGAGGAGCTACTAAAGAAAGAGTGCTGCAATTAATACAATTAATATAAGTGTGGTTATTGAAAATAACTATTCATTTATACGGAGGGTTGGCCGAGTGGTCTAAGGCGGCAGACTTAAGATCTGTTGGACGGTTGTCCGCGCGAGTTCGAACCTCGCATCCTTCAGTAATATTTTTTTAATATACATTTTCTCTGCCATCATGGCTTAAAAAATGCTTAAAAGAAGGGAATTAGGGGGGATGGATGAACTAAGACATAACTTTCTTTTCTTCAATTCGAACTCTGTTGGGAAGAGTTGCTTTAAAAAAGACTCTCTATCCATCTATAAAATTTATTAAAACTTTTGAACTGCACAGAATGATTGGCTCACTTAGAAACAAATTTGAGCATTTCAAAGT…	CGGTGGCAATTCTTTGCAAAATTCTGAAGATGACAACTTTTCTTCCAGTTCTACCACCAAATGCTTACTCTCTTCCACTTCTTCGCTATCAATAAATCAACGAGAAGCAGCAGCAGCTGCTTATGGTCCAGATACCGATATTCCTAGGGGTAAACTAGAAGTTACAATAATAGAAGCACGTGACCTAGTCACTAGATCAAAGGATTCACAGCCTTATGTTGTTTGTACTTTTGAGAGTTCAGAGTTCATTTCTAATGGTCCTGAGTCACTAGGCGCCATTAATAATAACAACAATAACAACAACAATAATCAGCATAATCAAAACCAGCATATTAACAACAACAACGAAAATACCAACCCTGACGCTGCTAGCCAGCATCATAATAATAACAGTGGTTG…
721	2011	1438	1438	0	0	NC_001134	347518	349584	NC_001136	314952	315696	|gene |tRNA note= GO_component: cytosol [goid 0005829] [evidence NAS] |gene |CDS[fcd=-674](+,347877,349382) note= Ybr056wp;	|gene gene= MDH3 |CDS[fcd=1064](-,315357,316388) gene= MDH3 note= Mdh3p;	CGGAGGAGCTACTAAAGAAAGAGTGCTGCAATTAATACAATTAATATAAGTGTGGTTATTGAAAATAACTATTCATTTATACGGAGGGTTGGCCGAGTGGTCTAAGGCGGCAGACTTAAGATCTGTTGGACGGTTGTCCGCGCGAGTTCGAACCTCGCATCCTTCAGTAATATTTTTTTAATATACATTTTCTCTGCCATCATGGCTTAAAAAATGCTTAAAAGAAGGGAATTAGGGGGGATGGATGAACTAAGACATAACTTTCTTTTCTTCAATTCGAACTCTGTTGGGAAGAGTTGCTTTAAAAAAGACTCTCTATCCATCTATAAAATTTATTAAAACTTTTGAACTGCACAGAATGATTGGCTCACTTAGAAACAAATTTGAGCATTTCAAAGT…	CGGTAGATCCTAACGGATAATGCTGCCCCTGGTTAGTTCCTCATCGGACGACTTTGCTCCCAGGGGCGGCCTTTGTCTTTCTCTTTTGCAGAATCAACTCTATTTTCCCCACCCCCCCGCTTTTTTTTTTTCATGTTCCTTTACCAATCTTTGAAAAATCACGAGATGGTGCATATTTGACAAGGAACGCTTAAAACATCGTGGAGTGAGTGTGGTAAAGGTAAACTGGTCATAGCGGAATTGGTCATAGCGGCGTAGTGCAGCGCAGCCACTAGGAGGATATGGTTTCCTTTCCTTCAATTTACTTGAGTATAAAATATCATAGTAAGCGAAACATTATACAACGATATGAGTCAAGATACAAAGGAGTATAGAGTTAAGAAAAATATAAAAATTGAA…
721	3904	1	1	0	0	NC_001134	347518	349584	NC_001137	462589	463251	|gene |tRNA note= GO_component: cytosol [goid 0005829] [evidence NAS] |gene |CDS[fcd=-674](+,347877,349382) note= Ybr056wp;	|gene gene= LSM5 |CDS(+,462580,462861) gene= LSM5 note= Lsm5p; |gene gene= SCC4 |CDS(-,462963,464837) gene= SCC4 note= Scc4p;	CGGAGGAGCTACTAAAGAAAGAGTGCTGCAATTAATACAATTAATATAAGTGTGGTTATTGAAAATAACTATTCATTTATACGGAGGGTTGGCCGAGTGGTCTAAGGCGGCAGACTTAAGATCTGTTGGACGGTTGTCCGCGCGAGTTCGAACCTCGCATCCTTCAGTAATATTTTTTTAATATACATTTTCTCTGCCATCATGGCTTAAAAAATGCTTAAAAGAAGGGAATTAGGGGGGATGGATGAACTAAGACATAACTTTCTTTTCTTCAATTCGAACTCTGTTGGGAAGAGTTGCTTTAAAAAAGACTCTCTATCCATCTATAAAATTTATTAAAACTTTTGAACTGCACAGAATGATTGGCTCACTTAGAAACAAATTTGAGCATTTCAAAGT…	CGGAGATTTTGCCTTTGGAAGTCATAGATAAAACAATTAACCAGAAAGTGTTGATTGTGCTGCAGTCGAACCGCGAGTTCGAGGGCACGTTAGTTGGTTTCGACGACTTCGTCAACGTTATACTGGAAGACGCTGTCGAGTGGCTTATCGATCCTGAGGACGAGAGCAGAAATGAGAAAGTTATGCAGCACCATGGCAGAATGCTTTTAAGCGGCAACAATATTGCCATCCTTGTGCCAGGCGGCAAAAAGACCCCTACGGAGGCGTTGTAAAAAGGCAAAAATTAACGCGAATTTGTATAGTGCATCTAAAAAAAATAATTAAGTATAAAAATAGATAAAGGAAATCAAGTGTTTCTTTTTTTTTTTTTGGTTTATTGTTTGACACTGGTGATTTGCT…
721	9172	108	108	0	0	NC_001134	347518	349584	NC_001144	703468	703955	|gene |tRNA note= GO_component: cytosol [goid 0005829] [evidence NAS] |gene |CDS[fcd=-674](+,347877,349382) note= Ybr056wp;	|gene |CDS[fcd=315](-,700001,704026) note= Ylr278cp;	CGGAGGAGCTACTAAAGAAAGAGTGCTGCAATTAATACAATTAATATAAGTGTGGTTATTGAAAATAACTATTCATTTATACGGAGGGTTGGCCGAGTGGTCTAAGGCGGCAGACTTAAGATCTGTTGGACGGTTGTCCGCGCGAGTTCGAACCTCGCATCCTTCAGTAATATTTTTTTAATATACATTTTCTCTGCCATCATGGCTTAAAAAATGCTTAAAAGAAGGGAATTAGGGGGGATGGATGAACTAAGACATAACTTTCTTTTCTTCAATTCGAACTCTGTTGGGAAGAGTTGCTTTAAAAAAGACTCTCTATCCATCTATAAAATTTATTAAAACTTTTGAACTGCACAGAATGATTGGCTCACTTAGAAACAAATTTGAGCATTTCAAAGT…	CGGCGATAAATCGAGCAAAGTCTCCAAACTTTTTAGTTTTTTCTCCAAGAAAATCGTATACTGATCTTTGTCTTGCCTCATCAGGTTTGGATTGGAATTTGTCGTGACGGACTTTATCGTTTTCCTGAATTCATTCGCGTCGCCAGCATCAACATTACTATTGCTAGTGGAAATGGGTTTTATTATCGTCATGTCATTCAGAGAAGTGGCAGCGCCAGCGCCAGCGCCAATACTGCTATCTTGCAGCTCACGTTTTATTACAGGATGAGGTGTAGGAGGTACAGTGCCAGCTGTAGGGGTGTTGTTGTTGGTGTTACTGTTCGAAGTGGAAGAAGAGTACTTGGAGGGCTGCACGCACTTTATTCCTGCTTTCAAACAGGCGGTACAACTGGGTAATTT…
721	11559	4	4	0	0	NC_001134	347518	349584	NC_001146	762310	763469	|gene |tRNA note= GO_component: cytosol [goid 0005829] [evidence NAS] |gene |CDS[fcd=-674](+,347877,349382) note= Ybr056wp;	|gene gene= BSC5 |CDS[fcd=-297](-,761123,762592) gene= BSC5 note= Bsc5p;	CGGAGGAGCTACTAAAGAAAGAGTGCTGCAATTAATACAATTAATATAAGTGTGGTTATTGAAAATAACTATTCATTTATACGGAGGGTTGGCCGAGTGGTCTAAGGCGGCAGACTTAAGATCTGTTGGACGGTTGTCCGCGCGAGTTCGAACCTCGCATCCTTCAGTAATATTTTTTTAATATACATTTTCTCTGCCATCATGGCTTAAAAAATGCTTAAAAGAAGGGAATTAGGGGGGATGGATGAACTAAGACATAACTTTCTTTTCTTCAATTCGAACTCTGTTGGGAAGAGTTGCTTTAAAAAAGACTCTCTATCCATCTATAAAATTTATTAAAACTTTTGAACTGCACAGAATGATTGGCTCACTTAGAAACAAATTTGAGCATTTCAAAGT…	CGGAAAGTATGTATCGAAACTAGATTGAGGTATATTGCTGAGCAAATTTTCATACATTTCGAATGACGGCAATAGTTCTGGAAGGACAAAGTCATCTTCCTGAACATTCGTTATGCTCGAGCAGTGATCTCCATTATTGCATGCGAAAGCGTCTTCTTCCTTTCCTTGGGATGTTCCACATCTCGGTTCCTCGAAGGAGGTTCCTCCAAAGAGTGTGGATGAAGATGAAGATATTCTTTGACAACCTTCAAATTTATTTTGTGGTTCTTTTGATTCTTGCATAAAGAAAAAACTTGATTATTCTTTAGTCTTCCAGACCAGCGAGGCTATTTAGTTCTATTAGATTGATATACCAAAGCGACTATGGAGCAAGTTTTACAATATCTGTATGATTGGCTG…
721	2013	4	4	0	0	NC_001134	347518	349584	NC_001136	316105	316140	|gene |tRNA note= GO_component: cytosol [goid 0005829] [evidence NAS] |gene |CDS[fcd=-674](+,347877,349382) note= Ybr056wp;	|gene gene= MDH3 |CDS[fcd=266](-,315357,316388) gene= MDH3 note= Mdh3p;	CGGAGGAGCTACTAAAGAAAGAGTGCTGCAATTAATACAATTAATATAAGTGTGGTTATTGAAAATAACTATTCATTTATACGGAGGGTTGGCCGAGTGGTCTAAGGCGGCAGACTTAAGATCTGTTGGACGGTTGTCCGCGCGAGTTCGAACCTCGCATCCTTCAGTAATATTTTTTTAATATACATTTTCTCTGCCATCATGGCTTAAAAAATGCTTAAAAGAAGGGAATTAGGGGGGATGGATGAACTAAGACATAACTTTCTTTTCTTCAATTCGAACTCTGTTGGGAAGAGTTGCTTTAAAAAAGACTCTCTATCCATCTATAAAATTTATTAAAACTTTTGAACTGCACAGAATGATTGGCTCACTTAGAAACAAATTTGAGCATTTCAAAGT…	CGGCGTTCATCTTGAACAAATCATCTCTAGTTAAA
721	13458	5	5	0	0	NC_001134	347518	349584	NC_001148	570481	571469	|gene |tRNA note= GO_component: cytosol [goid 0005829] [evidence NAS] |gene |CDS[fcd=-674](+,347877,349382) note= Ybr056wp;	|gene gene= REC8 note= synonym: SPO69 |CDS[fcd=400](-,569333,571375) gene= REC8 note= Rec8p;	CGGAGGAGCTACTAAAGAAAGAGTGCTGCAATTAATACAATTAATATAAGTGTGGTTATTGAAAATAACTATTCATTTATACGGAGGGTTGGCCGAGTGGTCTAAGGCGGCAGACTTAAGATCTGTTGGACGGTTGTCCGCGCGAGTTCGAACCTCGCATCCTTCAGTAATATTTTTTTAATATACATTTTCTCTGCCATCATGGCTTAAAAAATGCTTAAAAGAAGGGAATTAGGGGGGATGGATGAACTAAGACATAACTTTCTTTTCTTCAATTCGAACTCTGTTGGGAAGAGTTGCTTTAAAAAAGACTCTCTATCCATCTATAAAATTTATTAAAACTTTTGAACTGCACAGAATGATTGGCTCACTTAGAAACAAATTTGAGCATTTCAAAGT…	CGGCCCTTCATTTTCAACTGATGTATCTTCTCCTCCATTACTGTTATTTTCATTATCGTTCTCAAAATTCAACACCAATTCATCTCCTTGATAATTAAACTTGAAATCGTTTCCATCCTTCTGTGAACTTGAGTGAGAGCCTAAAGGTGTCCCCTGATGGCTCACTATATCATCTAAGTCCAGGTTAAAGTCCACATCAACGGGAATTTCATCCAGCGGAAAAGAATTTCTAACGTTAGATCCTAGATTACTTTGCGCGTCTGAGTTAGTCATGTCCCCATGAAGCTCGAACCTGTTAGAATTACTTAACTCATTGATGTAGTCTTGTCTCCTTATTGATTTAGCTTCCTCAATAAAAGATACATTATCTTGGAGAGTAGTGTTAAGAAACTCCAGTGC…
721	4798	9	9	0	0	NC_001134	347518	349584	NC_001139	392535	393187	|gene |tRNA note= GO_component: cytosol [goid 0005829] [evidence NAS] |gene |CDS[fcd=-674](+,347877,349382) note= Ybr056wp;	|gene |CDS[fcd=-633](+,392228,393703) note= Ygl059wp;	CGGAGGAGCTACTAAAGAAAGAGTGCTGCAATTAATACAATTAATATAAGTGTGGTTATTGAAAATAACTATTCATTTATACGGAGGGTTGGCCGAGTGGTCTAAGGCGGCAGACTTAAGATCTGTTGGACGGTTGTCCGCGCGAGTTCGAACCTCGCATCCTTCAGTAATATTTTTTTAATATACATTTTCTCTGCCATCATGGCTTAAAAAATGCTTAAAAGAAGGGAATTAGGGGGGATGGATGAACTAAGACATAACTTTCTTTTCTTCAATTCGAACTCTGTTGGGAAGAGTTGCTTTAAAAAAGACTCTCTATCCATCTATAAAATTTATTAAAACTTTTGAACTGCACAGAATGATTGGCTCACTTAGAAACAAATTTGAGCATTTCAAAGT…	CGGGAAATTTGTAAAAGAAGAACTGGTAATTAGGATCGCGCATAAATTAAATCAATTGCAACAACTTCCATTTAATGTTGTGAACAACTTCCATTTTGTTCAAGTTTATGAGTCATATTACAATATTTTTGAAAGCTTTAGAAAATATCCGACTATAAGAACTTTAGAGGACGCTTCTCAATTTGCAGATTTTATCAAAAATATGCTAGAAGGCTTCAATACTCTAAACTTACCACATTTGATAATGGGGGCTTTAGAATGTACAATTTTGGATCTTTATCCTCGTGAAAAAATGGACCAACTACTATCTGATCTGTTAAGAGCTCGAATATCAAGAAGATTGATTGTAGAGGAACACGTCGTATACACAGCCAACTACACTAGTGGTAAGGAGGAAAA…
721	10119	2	2	0	0	NC_001134	347518	349584	NC_001145	457273	457681	|gene |tRNA note= GO_component: cytosol [goid 0005829] [evidence NAS] |gene |CDS[fcd=-674](+,347877,349382) note= Ybr056wp;	|gene gene= SNO1 |CDS[fcd=481](-,457284,457958) gene= SNO1 note= Sno1p;	CGGAGGAGCTACTAAAGAAAGAGTGCTGCAATTAATACAATTAATATAAGTGTGGTTATTGAAAATAACTATTCATTTATACGGAGGGTTGGCCGAGTGGTCTAAGGCGGCAGACTTAAGATCTGTTGGACGGTTGTCCGCGCGAGTTCGAACCTCGCATCCTTCAGTAATATTTTTTTAATATACATTTTCTCTGCCATCATGGCTTAAAAAATGCTTAAAAGAAGGGAATTAGGGGGGATGGATGAACTAAGACATAACTTTCTTTTCTTCAATTCGAACTCTGTTGGGAAGAGTTGCTTTAAAAAAGACTCTCTATCCATCTATAAAATTTATTAAAACTTTTGAACTGCACAGAATGATTGGCTCACTTAGAAACAAATTTGAGCATTTCAAAGT…	CGGCGGTATTTTAATTAGAAACAAACTGTCTGATAAACCAATCATGAAATCTTGTATCACTGTCAGCAAGCTCTGGATGAAAAGAAGTCACAAGGATATTATGATTTTGCGTTGCAGCTACAACCACATCCTTTCCATTCACTGGCAATTCATATAAACTTTTAACCGCGATAGGATCAAGAATTCTCTCGATCACGGGTGCGCGAATAAATGTAGCAGGAAAATTATCACAGCCAGGTATGAAATTGGAAAAATCACACTTTTGTGTAAAAGATTGAGCTTGTCTTCCAAATGCGTTTCTTCTCACGTCGACCTTCAACACACCTAAAGTCTTTACTAGGGCACTTTCGTTTTCTAATTGCGCGCTTAAAAAGATGAGACCAGCACAAGTACCCCAAA…
721	4251	2	2	0	0	NC_001134	347518	349584	NC_001138	184005	184542	|gene |tRNA note= GO_component: cytosol [goid 0005829] [evidence NAS] |gene |CDS[fcd=-674](+,347877,349382) note= Ybr056wp;	|gene |CDS(-,183119,184210) note= Yfr018cp; |gene gene= FAB1 note= synonym: SVL7 |CDS(+,184490,191326) gene= FAB1 note= Fab1p;	CGGAGGAGCTACTAAAGAAAGAGTGCTGCAATTAATACAATTAATATAAGTGTGGTTATTGAAAATAACTATTCATTTATACGGAGGGTTGGCCGAGTGGTCTAAGGCGGCAGACTTAAGATCTGTTGGACGGTTGTCCGCGCGAGTTCGAACCTCGCATCCTTCAGTAATATTTTTTTAATATACATTTTCTCTGCCATCATGGCTTAAAAAATGCTTAAAAGAAGGGAATTAGGGGGGATGGATGAACTAAGACATAACTTTCTTTTCTTCAATTCGAACTCTGTTGGGAAGAGTTGCTTTAAAAAAGACTCTCTATCCATCTATAAAATTTATTAAAACTTTTGAACTGCACAGAATGATTGGCTCACTTAGAAACAAATTTGAGCATTTCAAAGT…	CGGGTACGCGCGTTCTGTTAAAAGGCAACAGCAGGTTCTTGGTACTTTTGTTCCAACCGCTGTCTGGGTTGATAGCTTCGTTCAGATGCGCTGCATGGTACTGCTCATATGACAACTCCCACCCAGTTACCCTATGCACCTGAAATAGCACCAACAGGTACGCTAGACCAATTAGTCGCAAAGGCAATACGTACTTCATTCCCATGCTTACGACCTTTTCAGTCTTTTTATTTCTTTTCTGTTGACTCTCTCTAACTCTCCCTCTCCCCCTCTTCTTCCCATGAAATGTATCACAAGCCGTCTTATTCCTTTGCTTCTTATATTCTTATGTTCCTTCCTTCGTCTCGCCTCGAAGGCAACGCAAACGCAATGTACTTCTTGACGAACGCGAAAACCATA…
721	12057	107	107	0	0	NC_001134	347518	349584	NC_001147	411663	412045	|gene |tRNA note= GO_component: cytosol [goid 0005829] [evidence NAS] |gene |CDS[fcd=-674](+,347877,349382) note= Ybr056wp;	|gene gene= WHI2 |CDS[fcd=-984](+,410870,412330) gene= WHI2 note= Whi2p;	CGGAGGAGCTACTAAAGAAAGAGTGCTGCAATTAATACAATTAATATAAGTGTGGTTATTGAAAATAACTATTCATTTATACGGAGGGTTGGCCGAGTGGTCTAAGGCGGCAGACTTAAGATCTGTTGGACGGTTGTCCGCGCGAGTTCGAACCTCGCATCCTTCAGTAATATTTTTTTAATATACATTTTCTCTGCCATCATGGCTTAAAAAATGCTTAAAAGAAGGGAATTAGGGGGGATGGATGAACTAAGACATAACTTTCTTTTCTTCAATTCGAACTCTGTTGGGAAGAGTTGCTTTAAAAAAGACTCTCTATCCATCTATAAAATTTATTAAAACTTTTGAACTGCACAGAATGATTGGCTCACTTAGAAACAAATTTGAGCATTTCAAAGT…	CGGATTCACCAAGGAAACTTGTTGGGGTAACAGAACTCAAGAAACTGGCAAAACGGTTATAAGTTCACTGTCTCTTTGCCGATTGGCTAACGAGACAACTGAAGGATTTAGGCAAAAATTTAACGAGGCTAAGGCTAAGTGGGAGGCAGAGCACAAACCTTCTCAAGACAACTTCATCACCCCAATGCAATCTAACATATCGATTAACTCTTTATCTGCAAGTAAATCTAACAGTACCATTTCTACAGCAAGGAATTTAACAAGCGGAAGTACAGCACCTGCTACAGCACGTGATAAGAGAAAATCAAGGCTGTCGAAACTAGCAGATAACGTTCGTTCGCACTCTTCCTCGAGACATAGTTCGCAGACCAGAAGTAAACCT
721	905	12	12	0	0	NC_001134	347518	349584	NC_001134	501138	501982	|gene |tRNA note= GO_component: cytosol [goid 0005829] [evidence NAS] |gene |CDS[fcd=-674](+,347877,349382) note= Ybr056wp;	|gene gene= AGP2 |CDS(-,499646,501436) gene= AGP2 note= Agp2p; |gene gene= HSL7 |CDS(-,501798,504281) gene= HSL7 note= Hsl7p;	CGGAGGAGCTACTAAAGAAAGAGTGCTGCAATTAATACAATTAATATAAGTGTGGTTATTGAAAATAACTATTCATTTATACGGAGGGTTGGCCGAGTGGTCTAAGGCGGCAGACTTAAGATCTGTTGGACGGTTGTCCGCGCGAGTTCGAACCTCGCATCCTTCAGTAATATTTTTTTAATATACATTTTCTCTGCCATCATGGCTTAAAAAATGCTTAAAAGAAGGGAATTAGGGGGGATGGATGAACTAAGACATAACTTTCTTTTCTTCAATTCGAACTCTGTTGGGAAGAGTTGCTTTAAAAAAGACTCTCTATCCATCTATAAAATTTATTAAAACTTTTGAACTGCACAGAATGATTGGCTCACTTAGAAACAAATTTGAGCATTTCAAAGT…	CGGAAATAGCAATCAACTGGACGTGCCTGTTTTCTAGTTTACGTCGAGTTTCTGTGAAATATAGCAGGTAAGTCCTTGAGTCATCATCAATAGAAGACCCTCTATCCTCATGTTCATCCACGTGAACATCGCCCGCTTCGGGTATCGTGTTTATGTGACCCACTGACCCAGAAGGTTCCAACCATCCCTCACTAGGTTCGATACTCTTTATTCGAGTGGTTATTGTCTTGTATTTATTCTTATCGTACTCAAAATCACCGTCATTTTCGTAGTCGATGGTCATACGTTCCTTTGTCATGCTTGGCAAAAGTTATGGAAGCAAAATGTAAGTGCAGCTTAGGGGGGACAAGGCTGAAGGAAAACTATTGTTTTTAATTACCACCTATTAGTATCTTAAAG…
721	3933	3	3	0	0	NC_001134	347518	349584	NC_001137	491245	491371	|gene |tRNA note= GO_component: cytosol [goid 0005829] [evidence NAS] |gene |CDS[fcd=-674](+,347877,349382) note= Ybr056wp;	|neigh_up CDS[fcd=-735](-,488852,490573) note= Yer158cp; |neigh_down CDS[fcd=645](-,491525,491953) gene= BUR6 note= Bur6p;	CGGAGGAGCTACTAAAGAAAGAGTGCTGCAATTAATACAATTAATATAAGTGTGGTTATTGAAAATAACTATTCATTTATACGGAGGGTTGGCCGAGTGGTCTAAGGCGGCAGACTTAAGATCTGTTGGACGGTTGTCCGCGCGAGTTCGAACCTCGCATCCTTCAGTAATATTTTTTTAATATACATTTTCTCTGCCATCATGGCTTAAAAAATGCTTAAAAGAAGGGAATTAGGGGGGATGGATGAACTAAGACATAACTTTCTTTTCTTCAATTCGAACTCTGTTGGGAAGAGTTGCTTTAAAAAAGACTCTCTATCCATCTATAAAATTTATTAAAACTTTTGAACTGCACAGAATGATTGGCTCACTTAGAAACAAATTTGAGCATTTCAAAGT…	CGGGGATCGTATGGGGTGATGCATGCTCTTTCGTAAACCTTAAGAATAGCGTTAATTTTTTCCTAAATAGGAATACACATACTCATGCTATGTAACTGTAGAGAAAGGTACAGATTACATGAGGCG
721	1994	882	882	9	9	NC_001134	347518	349584	NC_001136	303670	303859	|gene |tRNA note= GO_component: cytosol [goid 0005829] [evidence NAS] |gene |CDS[fcd=-674](+,347877,349382) note= Ybr056wp;	|gene gene= NDE2 note= synonym: NDH2 |CDS[fcd=-553](+,303211,304848) gene= NDE2 note= Nde2p;	CGGAGGAGCTACTAAAGAAAGAGTGCTGCAATTAATACAATTAATATAAGTGTGGTTATTGAAAATAACTATTCATTTATACGGAGGGTTGGCCGAGTGGTCTAAGGCGGCAGACTTAAGATCTGTTGGACGGTTGTCCGCGCGAGTTCGAACCTCGCATCCTTCAGTAATATTTTTTTAATATACATTTTCTCTGCCATCATGGCTTAAAAAATGCTTAAAAGAAGGGAATTAGGGGGGATGGATGAACTAAGACATAACTTTCTTTTCTTCAATTCGAACTCTGTTGGGAAGAGTTGCTTTAAAAAAGACTCTCTATCCATCTATAAAATTTATTAAAACTTTTGAACTGCACAGAATGATTGGCTCACTTAGAAACAAATTTGAGCATTTCAAAGT…	CGGTTAGATCGATCGCTAGAAGAACGCCTGGAGAAGTTCACTACATTGAGGCGGAAGCGTTGGACGTTGATCCAAAGGCCAAAAAAGTAATGGTGCAATCGGTGTCAGAGGACGAATATTTCGTTTCGAGCTTAAGTTACGATTATCTTGTTGTTAGTGTAGGCGCTAAAACCACTACTTTTAACATTC
721	1513	348	348	0	0	NC_001134	347518	349584	NC_001135	217174	217248	|gene |tRNA note= GO_component: cytosol [goid 0005829] [evidence NAS] |gene |CDS[fcd=-674](+,347877,349382) note= Ybr056wp;	|gene gene= THR4 |CDS[fcd=-518](+,216693,218237) gene= THR4 note= Thr4p;	CGGAGGAGCTACTAAAGAAAGAGTGCTGCAATTAATACAATTAATATAAGTGTGGTTATTGAAAATAACTATTCATTTATACGGAGGGTTGGCCGAGTGGTCTAAGGCGGCAGACTTAAGATCTGTTGGACGGTTGTCCGCGCGAGTTCGAACCTCGCATCCTTCAGTAATATTTTTTTAATATACATTTTCTCTGCCATCATGGCTTAAAAAATGCTTAAAAGAAGGGAATTAGGGGGGATGGATGAACTAAGACATAACTTTCTTTTCTTCAATTCGAACTCTGTTGGGAAGAGTTGCTTTAAAAAAGACTCTCTATCCATCTATAAAATTTATTAAAACTTTTGAACTGCACAGAATGATTGGCTCACTTAGAAACAAATTTGAGCATTTCAAAGT…	CGGTGACACTGGTTCTGCAGCCATCTACGGTTTAAGAGGCAAAAAGGACGTTTCCGTTTTCATCTTATATCCAA
721	1515	2398	2398	0	0	NC_001134	347518	349584	NC_001135	217324	217542	|gene |tRNA note= GO_component: cytosol [goid 0005829] [evidence NAS] |gene |CDS[fcd=-674](+,347877,349382) note= Ybr056wp;	|gene gene= THR4 |CDS[fcd=-740](+,216693,218237) gene= THR4 note= Thr4p;	CGGAGGAGCTACTAAAGAAAGAGTGCTGCAATTAATACAATTAATATAAGTGTGGTTATTGAAAATAACTATTCATTTATACGGAGGGTTGGCCGAGTGGTCTAAGGCGGCAGACTTAAGATCTGTTGGACGGTTGTCCGCGCGAGTTCGAACCTCGCATCCTTCAGTAATATTTTTTTAATATACATTTTCTCTGCCATCATGGCTTAAAAAATGCTTAAAAGAAGGGAATTAGGGGGGATGGATGAACTAAGACATAACTTTCTTTTCTTCAATTCGAACTCTGTTGGGAAGAGTTGCTTTAAAAAAGACTCTCTATCCATCTATAAAATTTATTAAAACTTTTGAACTGCACAGAATGATTGGCTCACTTAGAAACAAATTTGAGCATTTCAAAGT…	CGGTACTTTCGACAACTGTCAAGATATCGTCAAAGCTATTTTCGGTGACAAAGAATTCAACTCTAAACACAACGTCGGTGCTGTTAACTCCATCAACTGGGCAAGAATCTTGGCCCAAATGACCTATTACTTTTATTCATTCTTCCAAGCCACCAACGGTAAGGACTCCAAGAAGGTCAAGTTCGTTGTGCCAAGTGGGAACTTCGGTGATATATTGG
721	12460	2	2	0	0	NC_001134	347518	349584	NC_001147	764503	765105	|gene |tRNA note= GO_component: cytosol [goid 0005829] [evidence NAS] |gene |CDS[fcd=-674](+,347877,349382) note= Ybr056wp;	|gene |CDS[fcd=-1978](+,762826,766566) note= Yor227wp;	CGGAGGAGCTACTAAAGAAAGAGTGCTGCAATTAATACAATTAATATAAGTGTGGTTATTGAAAATAACTATTCATTTATACGGAGGGTTGGCCGAGTGGTCTAAGGCGGCAGACTTAAGATCTGTTGGACGGTTGTCCGCGCGAGTTCGAACCTCGCATCCTTCAGTAATATTTTTTTAATATACATTTTCTCTGCCATCATGGCTTAAAAAATGCTTAAAAGAAGGGAATTAGGGGGGATGGATGAACTAAGACATAACTTTCTTTTCTTCAATTCGAACTCTGTTGGGAAGAGTTGCTTTAAAAAAGACTCTCTATCCATCTATAAAATTTATTAAAACTTTTGAACTGCACAGAATGATTGGCTCACTTAGAAACAAATTTGAGCATTTCAAAGT…	CGGTAGTGGAGAAATTGGGGTTAAGAAATGTTGTGATAAACGAACAAAGTTGGAAACTACTTTGCAAGTTTTTATTACAAAATAAAACATTGATCAAGCTGGATATTTCTCAGACTAAAGCAAGGACAGATTTAAATGATTCTAACTACAGAGACCAAATGGACTGGGAACTATTTTGCGAAGTTCTTAGAAATAGAGAAGGTAGACCTTTGGAAGAATTGCTTTTGAATGGTTTAAGGTTTGACAAAATGTCATTCAGTCATTTCAAAAATATCCTACTTACTTTCGCACAAATGAACCCTAAAAACCCTATTCGTCTCGGGATGGCTAACGTAGAATTCTCAACCGAGTGTTTTGATTTTCTCTTTAATTGGATGTCTGAATATAACGTTCAAGGTG…
721	11043	1	2	0	0	NC_001134	347518	349584	NC_001146	311778	312911	|gene |tRNA note= GO_component: cytosol [goid 0005829] [evidence NAS] |gene |CDS[fcd=-674](+,347877,349382) note= Ybr056wp;	|gene gene= APC1 |CDS[fcd=-1706](+,310638,315884) gene= APC1 note= Apc1p;	CGGAGGAGCTACTAAAGAAAGAGTGCTGCAATTAATACAATTAATATAAGTGTGGTTATTGAAAATAACTATTCATTTATACGGAGGGTTGGCCGAGTGGTCTAAGGCGGCAGACTTAAGATCTGTTGGACGGTTGTCCGCGCGAGTTCGAACCTCGCATCCTTCAGTAATATTTTTTTAATATACATTTTCTCTGCCATCATGGCTTAAAAAATGCTTAAAAGAAGGGAATTAGGGGGGATGGATGAACTAAGACATAACTTTCTTTTCTTCAATTCGAACTCTGTTGGGAAGAGTTGCTTTAAAAAAGACTCTCTATCCATCTATAAAATTTATTAAAACTTTTGAACTGCACAGAATGATTGGCTCACTTAGAAACAAATTTGAGCATTTCAAAGT…	CGGATGATATCATTTTTACTTCACGACGCTTGAGCTCTATTTTAAGTAAATTAAAGTTCCTATCGTTGAGATTTGAACGTCGAGAAGGACTTTTAATATTTCATGAGCCCACACATTTCTGCAAAATCTGGTTGATTGATCTTTTACCCGATGTTCTGGATTCTATTCCATTCAAAATATACGGGAACTCTCCGCAAAACATGATCAGACTAGAGAACTTAAAGCTTAAGGAACCCTCAAGAATACAAGCTATGTATATTCATGAACTCCTTGAAAGTTGCCTGATTTTGGTGTCGGAGGGACAGAATAAGGAAGAATACAAAGCATGTCTATATGACCCCTTCGTTAAAATTACATCCCCTTCCAAAAATATCTCCGAAGAGCTCACTAAACAAAATT…
721	1977	8	8	0	0	NC_001134	347518	349584	NC_001136	288200	288559	|gene |tRNA note= GO_component: cytosol [goid 0005829] [evidence NAS] |gene |CDS[fcd=-674](+,347877,349382) note= Ybr056wp;	|gene gene= PMT1 |CDS[fcd=-1320](+,287059,289512) gene= PMT1 note= Pmt1p;	CGGAGGAGCTACTAAAGAAAGAGTGCTGCAATTAATACAATTAATATAAGTGTGGTTATTGAAAATAACTATTCATTTATACGGAGGGTTGGCCGAGTGGTCTAAGGCGGCAGACTTAAGATCTGTTGGACGGTTGTCCGCGCGAGTTCGAACCTCGCATCCTTCAGTAATATTTTTTTAATATACATTTTCTCTGCCATCATGGCTTAAAAAATGCTTAAAAGAAGGGAATTAGGGGGGATGGATGAACTAAGACATAACTTTCTTTTCTTCAATTCGAACTCTGTTGGGAAGAGTTGCTTTAAAAAAGACTCTCTATCCATCTATAAAATTTATTAAAACTTTTGAACTGCACAGAATGATTGGCTCACTTAGAAACAAATTTGAGCATTTCAAAGT…	CGGCGAATCTTTAACAACATTCCAAAACCTAACCGATGGTACCAAGGTCAGACTATTCCACACTGTTACAAGATGTAGATTACACTCTCATGACCATAAGCCACCCGTTTCAGAAAGCAGCGACTGGCAGAAGGAGGTTTCTTGTTATGGTTACAGCGGATTCGACGGTGATGCTAATGATGACTGGGTTGTTGAGATTGATAAAAAGAATTCTGCTCCTGGAGTTGCCCAAGAACGGGTCATAGCTTTGGACACAAAGTTTAGATTGAGACATGCTATGACAGGCTGTTATTTGTTTTCCCACGAAGTCAAGTTGCCAGCTTGGGGGTTCGAACAACAAGAAGTTACCTGTGCCTCCT
721	1013	76	76	0	0	NC_001134	347518	349584	NC_001134	611438	611552	|gene |tRNA note= GO_component: cytosol [goid 0005829] [evidence NAS] |gene |CDS[fcd=-674](+,347877,349382) note= Ybr056wp;	|gene gene= MSI1 note= synonym: CAC3 |CDS[fcd=382](-,610609,611877) gene= MSI1 note= Msi1p;	CGGAGGAGCTACTAAAGAAAGAGTGCTGCAATTAATACAATTAATATAAGTGTGGTTATTGAAAATAACTATTCATTTATACGGAGGGTTGGCCGAGTGGTCTAAGGCGGCAGACTTAAGATCTGTTGGACGGTTGTCCGCGCGAGTTCGAACCTCGCATCCTTCAGTAATATTTTTTTAATATACATTTTCTCTGCCATCATGGCTTAAAAAATGCTTAAAAGAAGGGAATTAGGGGGGATGGATGAACTAAGACATAACTTTCTTTTCTTCAATTCGAACTCTGTTGGGAAGAGTTGCTTTAAAAAAGACTCTCTATCCATCTATAAAATTTATTAAAACTTTTGAACTGCACAGAATGATTGGCTCACTTAGAAACAAATTTGAGCATTTCAAAGT…	CGGCTATAATATCTGGATTTTGAGGCAAATATCTTGCCCTATTGCATTCCCCGTTTGGGAAGAAAATACTGATGTCATTTACTAAGTGTTTGGAGGGAAACCTTGTCGAGTTCT
721	7692	793	793	25	25	NC_001134	347518	349584	NC_001143	132455	132605	|gene |tRNA note= GO_component: cytosol [goid 0005829] [evidence NAS] |gene |CDS[fcd=-674](+,347877,349382) note= Ybr056wp;	|gene gene= KKQ8 |CDS[fcd=937](-,131293,133467) gene= KKQ8 note= Kkq8p;	CGGAGGAGCTACTAAAGAAAGAGTGCTGCAATTAATACAATTAATATAAGTGTGGTTATTGAAAATAACTATTCATTTATACGGAGGGTTGGCCGAGTGGTCTAAGGCGGCAGACTTAAGATCTGTTGGACGGTTGTCCGCGCGAGTTCGAACCTCGCATCCTTCAGTAATATTTTTTTAATATACATTTTCTCTGCCATCATGGCTTAAAAAATGCTTAAAAGAAGGGAATTAGGGGGGATGGATGAACTAAGACATAACTTTCTTTTCTTCAATTCGAACTCTGTTGGGAAGAGTTGCTTTAAAAAAGACTCTCTATCCATCTATAAAATTTATTAAAACTTTTGAACTGCACAGAATGATTGGCTCACTTAGAAACAAATTTGAGCATTTCAAAGT…	CGGTTCTTTTCTCATGGTTTGTCTGAGATTTTTCTACGTTTGGCAGAAGAGATAAAGCGTTTTCAATATCGCATTCATTTTTATGATGTTTGAATAGACCAGAAAGAGTAATACCTAATCTTGGTCTAGATAATGATCCCTGTCGATGTG
721	461	488	488	0	0	NC_001134	347518	349584	NC_001134	135930	136238	|gene |tRNA note= GO_component: cytosol [goid 0005829] [evidence NAS] |gene |CDS[fcd=-674](+,347877,349382) note= Ybr056wp;	|gene |CDS[fcd=-83](+,136001,136369) note= Ybl044wp;	CGGAGGAGCTACTAAAGAAAGAGTGCTGCAATTAATACAATTAATATAAGTGTGGTTATTGAAAATAACTATTCATTTATACGGAGGGTTGGCCGAGTGGTCTAAGGCGGCAGACTTAAGATCTGTTGGACGGTTGTCCGCGCGAGTTCGAACCTCGCATCCTTCAGTAATATTTTTTTAATATACATTTTCTCTGCCATCATGGCTTAAAAAATGCTTAAAAGAAGGGAATTAGGGGGGATGGATGAACTAAGACATAACTTTCTTTTCTTCAATTCGAACTCTGTTGGGAAGAGTTGCTTTAAAAAAGACTCTCTATCCATCTATAAAATTTATTAAAACTTTTGAACTGCACAGAATGATTGGCTCACTTAGAAACAAATTTGAGCATTTCAAAGT…	CGGGTTATGTAAATCGTGAAAAAGAATATCTGGTTTTAAAATCTCTCTTTTCTTTTTCCCCCTGGTGGGTATGGGTGAAATGCTAGAGAGGCAAAAAAAAAGGTTGCCAAGTAAAGCGAAGTATTTGAAGTATACTGCAAGCATCACCGAAACAGGAAATCACGAAGCTGACTCATCTGTGATTTTCCGTCCCCACCATAGTGATGTAACATGCAGTAACGCACGGCGGGCCGAAAGTCGGACTTTACCCCAGATTTGTAGTTGTATCCTATTGGATCACGGGCGACGGACAAGACCCGAAGTGCGGA
721	459	37	37	0	0	NC_001134	347518	349584	NC_001134	135347	135886	|gene |tRNA note= GO_component: cytosol [goid 0005829] [evidence NAS] |gene |CDS[fcd=-674](+,347877,349382) note= Ybr056wp;	|gene gene= COR1 note= synonym: QCR1 |CDS[fcd=-97](-,134146,135519) gene= COR1 note= Cor1p;	CGGAGGAGCTACTAAAGAAAGAGTGCTGCAATTAATACAATTAATATAAGTGTGGTTATTGAAAATAACTATTCATTTATACGGAGGGTTGGCCGAGTGGTCTAAGGCGGCAGACTTAAGATCTGTTGGACGGTTGTCCGCGCGAGTTCGAACCTCGCATCCTTCAGTAATATTTTTTTAATATACATTTTCTCTGCCATCATGGCTTAAAAAATGCTTAAAAGAAGGGAATTAGGGGGGATGGATGAACTAAGACATAACTTTCTTTTCTTCAATTCGAACTCTGTTGGGAAGAGTTGCTTTAAAAAAGACTCTCTATCCATCTATAAAATTTATTAAAACTTTTGAACTGCACAGAATGATTGGCTCACTTAGAAACAAATTTGAGCATTTCAAAGT…	CGGAGCCGAAGACAACACCGACAGAGGCTGTGTGAGCGGAAGGATTATGCTCAGTGGCTACAACTATACCGTTAGATAATTGCGTTACTTCGGCCTTGGGGGTTGCTACAGCTGTAGCCAAAGACCTCTTGAACTGGTTAGATACAGTCTTTGAAGTTACTGTTCTTAGCATTTTTTTTGTTTATATATCTTGTGTTTTCTTTCTCAGTGATATGGTGACGATGATGTTCTTCTCGTATTATTACTCCACAATTGTCTTGATCAGCAATGGTAGCAATTTAATATTAGGATTCGTTACCTATACGAACAGGGATGATATAATATTTTTTCTGTGAAAGCTATTGCTTTATTATACGCTGTTTTCCTCGAATAAGACGGGGAAAGAGAGTAGGGGAATAT…
721	12159	116	116	0	0	NC_001134	347518	349584	NC_001147	504816	505059	|gene |tRNA note= GO_component: cytosol [goid 0005829] [evidence NAS] |gene |CDS[fcd=-674](+,347877,349382) note= Ybr056wp;	|neigh_up CDS[fcd=-608](-,503553,504329) gene= RKI1 note= Rki1p; |neigh_down CDS[fcd=2569](-,506979,507506) note= Yor097cp;	CGGAGGAGCTACTAAAGAAAGAGTGCTGCAATTAATACAATTAATATAAGTGTGGTTATTGAAAATAACTATTCATTTATACGGAGGGTTGGCCGAGTGGTCTAAGGCGGCAGACTTAAGATCTGTTGGACGGTTGTCCGCGCGAGTTCGAACCTCGCATCCTTCAGTAATATTTTTTTAATATACATTTTCTCTGCCATCATGGCTTAAAAAATGCTTAAAAGAAGGGAATTAGGGGGGATGGATGAACTAAGACATAACTTTCTTTTCTTCAATTCGAACTCTGTTGGGAAGAGTTGCTTTAAAAAAGACTCTCTATCCATCTATAAAATTTATTAAAACTTTTGAACTGCACAGAATGATTGGCTCACTTAGAAACAAATTTGAGCATTTCAAAGT…	CGGATGTCATTGTATAATCTTTTATAGAAAAAGGCTTTCTGAAATTTGAACATGACTAATTAACGCATATCAGGTGGGTAATCTTTCCGCAATACTATAACTTTGCTAGAAGTTATGTAAACGTTTTAGTTTACAAGAGAAAGTTTTGTGAACATTATCAGTGCCAAAACAGAAGCGGTATTACGATCGAAAATGCCAAATAAGACCGTCCGATGCCCCTTTCTTCTGCTACTCGTGATCTCA
721	2932	19	19	0	0	NC_001134	347518	349584	NC_001136	1164942	1165078	|gene |tRNA note= GO_component: cytosol [goid 0005829] [evidence NAS] |gene |CDS[fcd=-674](+,347877,349382) note= Ybr056wp;	|neigh_up CDS[fcd=-356](-,1162951,1164654) gene= HXT3 note= Hxt3p; |neigh_down CDS[fcd=3643](-,1167208,1168653) gene= SVF1 note= Svf1p;	CGGAGGAGCTACTAAAGAAAGAGTGCTGCAATTAATACAATTAATATAAGTGTGGTTATTGAAAATAACTATTCATTTATACGGAGGGTTGGCCGAGTGGTCTAAGGCGGCAGACTTAAGATCTGTTGGACGGTTGTCCGCGCGAGTTCGAACCTCGCATCCTTCAGTAATATTTTTTTAATATACATTTTCTCTGCCATCATGGCTTAAAAAATGCTTAAAAGAAGGGAATTAGGGGGGATGGATGAACTAAGACATAACTTTCTTTTCTTCAATTCGAACTCTGTTGGGAAGAGTTGCTTTAAAAAAGACTCTCTATCCATCTATAAAATTTATTAAAACTTTTGAACTGCACAGAATGATTGGCTCACTTAGAAACAAATTTGAGCATTTCAAAGT…	CGGAAATACCAACATCGGGGAAAGCGGAAAATCTGGAAAAATTCTCCACGAAGCTTTCTCTGTGATAATCCGCGACCGAGAGTTTAACCGAATCCGCGGAACGAGATATTCCGTGTTTATTGCGGTATTATATGAG
721	5307	2	2	16	16	NC_001134	347518	349584	NC_001139	857826	858130	|gene |tRNA note= GO_component: cytosol [goid 0005829] [evidence NAS] |gene |CDS[fcd=-674](+,347877,349382) note= Ybr056wp;	|neigh_up CDS[fcd=-1672](-,855269,856306) gene= RNR4 note= Rnr4p; |neigh_down CDS[fcd=314](+,858292,858609) gene= TIM13 note= Tim13p;	CGGAGGAGCTACTAAAGAAAGAGTGCTGCAATTAATACAATTAATATAAGTGTGGTTATTGAAAATAACTATTCATTTATACGGAGGGTTGGCCGAGTGGTCTAAGGCGGCAGACTTAAGATCTGTTGGACGGTTGTCCGCGCGAGTTCGAACCTCGCATCCTTCAGTAATATTTTTTTAATATACATTTTCTCTGCCATCATGGCTTAAAAAATGCTTAAAAGAAGGGAATTAGGGGGGATGGATGAACTAAGACATAACTTTCTTTTCTTCAATTCGAACTCTGTTGGGAAGAGTTGCTTTAAAAAAGACTCTCTATCCATCTATAAAATTTATTAAAACTTTTGAACTGCACAGAATGATTGGCTCACTTAGAAACAAATTTGAGCATTTCAAAGT…	CGGTGTATTACCCGCAAGAATTCTGATAACGTTCAAGCTAAAACAAAACTGCTAAATGAGTTCTGAAATGGCATTTATGAGTACATATGATAGATTTGCTATGTATCAAACCTGGAACTGGCGCTAGCGCTATGGTTTCACTTCCTCATTAAACCATACCCTTGACGATTTGACAGGTCGCTACAGATTCAGAAAGAGATCATATCAATACAACAAATAAAATATAAGCGAATAAAGAGCAATGTCTTTCCCCTTTAGTCACATTACTAGCCAACGCTAATTCTTGATCTCCTTCCTCTTGTTT
721	12950	375	375	10	10	NC_001134	347518	349584	NC_001148	114612	114674	|gene |tRNA note= GO_component: cytosol [goid 0005829] [evidence NAS] |gene |CDS[fcd=-674](+,347877,349382) note= Ybr056wp;	|neigh_up CDS[fcd=-5991](+,108652,114315) gene= FAS2 note= Fas2p; |neigh_down CDS[fcd=669](+,115312,116487) gene= USV1 note= Usv1p;	CGGAGGAGCTACTAAAGAAAGAGTGCTGCAATTAATACAATTAATATAAGTGTGGTTATTGAAAATAACTATTCATTTATACGGAGGGTTGGCCGAGTGGTCTAAGGCGGCAGACTTAAGATCTGTTGGACGGTTGTCCGCGCGAGTTCGAACCTCGCATCCTTCAGTAATATTTTTTTAATATACATTTTCTCTGCCATCATGGCTTAAAAAATGCTTAAAAGAAGGGAATTAGGGGGGATGGATGAACTAAGACATAACTTTCTTTTCTTCAATTCGAACTCTGTTGGGAAGAGTTGCTTTAAAAAAGACTCTCTATCCATCTATAAAATTTATTAAAACTTTTGAACTGCACAGAATGATTGGCTCACTTAGAAACAAATTTGAGCATTTCAAAGT…	CGGTTTTTATTCCTCCCGTGGTTGTTGTCTCTACCGTGAGGAGGGGAAAGGGTCAGGGACGG
721	5306	121	121	1822	1822	NC_001134	347518	349584	NC_001139	857273	857825	|gene |tRNA note= GO_component: cytosol [goid 0005829] [evidence NAS] |gene |CDS[fcd=-674](+,347877,349382) note= Ybr056wp;	|gene note= GO_component: cytosol [goid 0005829] [evidence NAS] |neigh_up CDS[fcd=-1243](-,855269,856306) gene= RNR4 note= Rnr4p; |neigh_down CDS[fcd=743](+,858292,858609) gene= TIM13 note= Tim13p;	CGGAGGAGCTACTAAAGAAAGAGTGCTGCAATTAATACAATTAATATAAGTGTGGTTATTGAAAATAACTATTCATTTATACGGAGGGTTGGCCGAGTGGTCTAAGGCGGCAGACTTAAGATCTGTTGGACGGTTGTCCGCGCGAGTTCGAACCTCGCATCCTTCAGTAATATTTTTTTAATATACATTTTCTCTGCCATCATGGCTTAAAAAATGCTTAAAAGAAGGGAATTAGGGGGGATGGATGAACTAAGACATAACTTTCTTTTCTTCAATTCGAACTCTGTTGGGAAGAGTTGCTTTAAAAAAGACTCTCTATCCATCTATAAAATTTATTAAAACTTTTGAACTGCACAGAATGATTGGCTCACTTAGAAACAAATTTGAGCATTTCAAAGT…	CGGTTCCCTTTCTTGCCTGAAATGCTCGTTCTAATGGAAAAAAAAAGAAATAAAGGTGGGCCTGCCCATTAGCAGGAAATTGGTACTTAATTATTGAAAAAAAAATTATTGGTTGCTAAGAGATTCGAACTCTTGCATCTTACGATACCTGAGTATTCCCACAGTTAACTGCGGTCAAGATATTTCTTGAATCAGGCGCCTTAGACCGCTCGGCCAAACAACCACTTATTTGTTGAAAGCGAGCGCGGTACAAGTAATGTTACCTCATCTGATATACAATAAAGGTGGAGCGCCAATATATACGCATTTGACTGTTCATAATTCATTGAATATAATTTATTCCTTGTTAGTACAAAAGGGTTAAACAGAAAAAGACGTGACGTTGTAACCGAGAGGATG…
721	5305	24	24	133	133	NC_001134	347518	349584	NC_001139	856823	857272	|gene |tRNA note= GO_component: cytosol [goid 0005829] [evidence NAS] |gene |CDS[fcd=-674](+,347877,349382) note= Ybr056wp;	|neigh_up CDS[fcd=-741](-,855269,856306) gene= RNR4 note= Rnr4p; |neigh_down CDS[fcd=1245](+,858292,858609) gene= TIM13 note= Tim13p;	CGGAGGAGCTACTAAAGAAAGAGTGCTGCAATTAATACAATTAATATAAGTGTGGTTATTGAAAATAACTATTCATTTATACGGAGGGTTGGCCGAGTGGTCTAAGGCGGCAGACTTAAGATCTGTTGGACGGTTGTCCGCGCGAGTTCGAACCTCGCATCCTTCAGTAATATTTTTTTAATATACATTTTCTCTGCCATCATGGCTTAAAAAATGCTTAAAAGAAGGGAATTAGGGGGGATGGATGAACTAAGACATAACTTTCTTTTCTTCAATTCGAACTCTGTTGGGAAGAGTTGCTTTAAAAAAGACTCTCTATCCATCTATAAAATTTATTAAAACTTTTGAACTGCACAGAATGATTGGCTCACTTAGAAACAAATTTGAGCATTTCAAAGT…	CGGTGCTTGGTGTTGGGTGGTCGTACCTGCTAGTTCCATTGGTGCGGTGTATGGGCGGGTACCCTCAAAAAGGGAAACGAAGGTAGGCGCACGGTGCTTATTAAGCTCAGAGGCGACCTCGCAGAAGGGGGCAGACCACACAAGCGGTGGAGGCGCTCCAGATATTCAGTGGAGTGGGGCTTGCTCATGTTCTGTTGTTGGTTTTGGATAGAAAAAGAGCGGGTTGAATAGTTTGCCATGGCAACCACTCTGGAAGCGAAATCACATAGACGCGTAAACACTCACACACAGGATATTCGTATAGCAAGGTACTAGTGGCGACACTCAGGTGGTCCTCGTTGCCTTATCTCCAGATTCCTCAATTTCTGTGAAACGTAAACATTATGGGAATAGTCTAGA…
721	13566	93	93	1	1	NC_001134	347518	349584	NC_001148	656215	656302	|gene |tRNA note= GO_component: cytosol [goid 0005829] [evidence NAS] |gene |CDS[fcd=-674](+,347877,349382) note= Ybr056wp;	|gene gene= MNI2 |CDS[fcd=291](-,655137,656549) gene= MNI2 note= Mni2p;	CGGAGGAGCTACTAAAGAAAGAGTGCTGCAATTAATACAATTAATATAAGTGTGGTTATTGAAAATAACTATTCATTTATACGGAGGGTTGGCCGAGTGGTCTAAGGCGGCAGACTTAAGATCTGTTGGACGGTTGTCCGCGCGAGTTCGAACCTCGCATCCTTCAGTAATATTTTTTTAATATACATTTTCTCTGCCATCATGGCTTAAAAAATGCTTAAAAGAAGGGAATTAGGGGGGATGGATGAACTAAGACATAACTTTCTTTTCTTCAATTCGAACTCTGTTGGGAAGAGTTGCTTTAAAAAAGACTCTCTATCCATCTATAAAATTTATTAAAACTTTTGAACTGCACAGAATGATTGGCTCACTTAGAAACAAATTTGAGCATTTCAAAGT…	CGGATACCCCGTTAGAAAGGGCTGATGCCTTCTTAGATACTCTTGGTAATTTCTTTTTAATGTTTTTGTTCATACGTTTTTGTAATC
721	3371	1	1	0	0	NC_001134	347518	349584	NC_001137	41007	41207	|gene |tRNA note= GO_component: cytosol [goid 0005829] [evidence NAS] |gene |CDS[fcd=-674](+,347877,349382) note= Ybr056wp;	|gene gene= PRB1 note= synonym: CVT1 |CDS[fcd=846](-,40046,41953) gene= PRB1 note= Prb1p;	CGGAGGAGCTACTAAAGAAAGAGTGCTGCAATTAATACAATTAATATAAGTGTGGTTATTGAAAATAACTATTCATTTATACGGAGGGTTGGCCGAGTGGTCTAAGGCGGCAGACTTAAGATCTGTTGGACGGTTGTCCGCGCGAGTTCGAACCTCGCATCCTTCAGTAATATTTTTTTAATATACATTTTCTCTGCCATCATGGCTTAAAAAATGCTTAAAAGAAGGGAATTAGGGGGGATGGATGAACTAAGACATAACTTTCTTTTCTTCAATTCGAACTCTGTTGGGAAGAGTTGCTTTAAAAAAGACTCTCTATCCATCTATAAAATTTATTAAAACTTTTGAACTGCACAGAATGATTGGCTCACTTAGAAACAAATTTGAGCATTTCAAAGT…	CGGCATCATCATCGTAGAGATACTTGTTGAAGGACCCCAGGTTGAGGCGCTCTCTGTGGGAAATACGGGCCAACCCCCATGGGGCGCTATTTTGAGTGTCAAATTCTGTAGCCTCGACAATAGAGTCTCTCTCAACAAAGTCTACTAATGGGTTTTGACGTATCAAGTCGACAATCTCTTGGGTGAAGTAACCGATGTAA
721	13507	1	1	0	0	NC_001134	347518	349584	NC_001148	617039	617637	|gene |tRNA note= GO_component: cytosol [goid 0005829] [evidence NAS] |gene |CDS[fcd=-674](+,347877,349382) note= Ybr056wp;	|gene gene= ATH1 |CDS[fcd=-1962](+,615376,619011) gene= ATH1 note= Ath1p;	CGGAGGAGCTACTAAAGAAAGAGTGCTGCAATTAATACAATTAATATAAGTGTGGTTATTGAAAATAACTATTCATTTATACGGAGGGTTGGCCGAGTGGTCTAAGGCGGCAGACTTAAGATCTGTTGGACGGTTGTCCGCGCGAGTTCGAACCTCGCATCCTTCAGTAATATTTTTTTAATATACATTTTCTCTGCCATCATGGCTTAAAAAATGCTTAAAAGAAGGGAATTAGGGGGGATGGATGAACTAAGACATAACTTTCTTTTCTTCAATTCGAACTCTGTTGGGAAGAGTTGCTTTAAAAAAGACTCTCTATCCATCTATAAAATTTATTAAAACTTTTGAACTGCACAGAATGATTGGCTCACTTAGAAACAAATTTGAGCATTTCAAAGT…	CGGAGCAATATACCCCTGGACATCTGGTAAGTACGCTAATTGTACTTCTACGGGACCTTGTGTCGATTACGAATACCATATTAACGTTGATGTCGCTATGGCCTCCTTTTCCATATACTTGAATGGACACGAAGGGATTGATGACGAGTATCTGAGATATACTACATGGCCAATTATCAAAAACGCAGCCCAATTTTTTACTGCTTATGTTAAGTACAATTCTTCCCTAGGATTGTATGAAACATATAATTTGACAGATCCCGACGAGTTTGCTAATCACATCAATAACGGGGCTTTCACGAATGCTGGCATTAAAACACTTCTAAAGTGGGCAACAGACATTGGCAATCATCTCGGCGAGGTCGTTGACCCCAAATGGAGTGAAATTTCCAAAGATAT…
721	4832	15	15	1687	1687	NC_001134	347518	349584	NC_001139	413585	414274	|gene |tRNA note= GO_component: cytosol [goid 0005829] [evidence NAS] |gene |CDS[fcd=-674](+,347877,349382) note= Ybr056wp;	|gene gene= RIM8 note= synonyms: YGL046W, PAL3 |CDS[fcd=177](+,414106,415734) gene= RIM8 note= Rim8p;	CGGAGGAGCTACTAAAGAAAGAGTGCTGCAATTAATACAATTAATATAAGTGTGGTTATTGAAAATAACTATTCATTTATACGGAGGGTTGGCCGAGTGGTCTAAGGCGGCAGACTTAAGATCTGTTGGACGGTTGTCCGCGCGAGTTCGAACCTCGCATCCTTCAGTAATATTTTTTTAATATACATTTTCTCTGCCATCATGGCTTAAAAAATGCTTAAAAGAAGGGAATTAGGGGGGATGGATGAACTAAGACATAACTTTCTTTTCTTCAATTCGAACTCTGTTGGGAAGAGTTGCTTTAAAAAAGACTCTCTATCCATCTATAAAATTTATTAAAACTTTTGAACTGCACAGAATGATTGGCTCACTTAGAAACAAATTTGAGCATTTCAAAGT…	CGGAATTTCCTTGGCCTTTTTTAAGTTTCTTCTCTTCTATTCTTTTTCCCCTTTCTTTCTTCCTTTGCTATCTGTCTGGTTTAAATAAACATAGTATTTTTTTGTGTCTAAGCCTCTTCCTCTTCTCTCGTACTTGCTCTACTACCACTTTACTTAATCGCCTTTCTTTGTTTTCTTTCTTCGTTATTTGTTCTTGGAACTTTTCCGCTCCAATCCCAACGATTGGCTTCAAAACACGTTCTACTGTCTAGCAATTTCTGCAGGTGCCATTTTTCTTAGGCTTATACCCTTTCCTTTTCCCCTTACATTTGATTTCTTCTTCAAAGTTCCTTATAGTATTATTGTCTAAGCTCTATTGAGTCAAAAGTAACAATCTAGACGAAGGAAAAAAAAAAAATA…
721	5802	1	1	0	0	NC_001134	347518	349584	NC_001140	179579	179967	|gene |tRNA note= GO_component: cytosol [goid 0005829] [evidence NAS] |gene |CDS[fcd=-674](+,347877,349382) note= Ybr056wp;	|gene |CDS[fcd=-1561](+,178212,180104) note= Yhr035wp;	CGGAGGAGCTACTAAAGAAAGAGTGCTGCAATTAATACAATTAATATAAGTGTGGTTATTGAAAATAACTATTCATTTATACGGAGGGTTGGCCGAGTGGTCTAAGGCGGCAGACTTAAGATCTGTTGGACGGTTGTCCGCGCGAGTTCGAACCTCGCATCCTTCAGTAATATTTTTTTAATATACATTTTCTCTGCCATCATGGCTTAAAAAATGCTTAAAAGAAGGGAATTAGGGGGGATGGATGAACTAAGACATAACTTTCTTTTCTTCAATTCGAACTCTGTTGGGAAGAGTTGCTTTAAAAAAGACTCTCTATCCATCTATAAAATTTATTAAAACTTTTGAACTGCACAGAATGATTGGCTCACTTAGAAACAAATTTGAGCATTTCAAAGT…	CGGGGAAAAGACGTAGATATGGTCAATCTGATACAGTGGTGTTATCATATATATAGGTCTCCAATTCTATCGGTTCGGAATACTTCACCTGATGAAAGGTACCTTTTTCTTCACCGAATAATAAACGCTTCTAAAGACACATGCCTTTCATTATGCAAACCCTTCATCTGGAGTTACAGTGATTTGAAACACGACTGGATCGTGTTGGATGTCCCATTAACAAGAGCCCAGATACTTCAAGATGATAAAACCACCATTTGTGTAGATGGTGGCTCGTACTTAGTTTTAAGAAGGGGAAAACTTTTGGAAAAAGAAGGTCGCGAGCTCTGTTGCAAGCTTTTAAATGACTTGCAAAGGTTTCCGCAGCCATTATATGTTGAAACTAAAA
721	2894	25	25	0	0	NC_001134	347518	349584	NC_001136	1128401	1128649	|gene |tRNA note= GO_component: cytosol [goid 0005829] [evidence NAS] |gene |CDS[fcd=-674](+,347877,349382) note= Ybr056wp;	|gene gene= UBX5 |CDS[fcd=-658](+,1127867,1129369) gene= UBX5 note= Ubx5p;	CGGAGGAGCTACTAAAGAAAGAGTGCTGCAATTAATACAATTAATATAAGTGTGGTTATTGAAAATAACTATTCATTTATACGGAGGGTTGGCCGAGTGGTCTAAGGCGGCAGACTTAAGATCTGTTGGACGGTTGTCCGCGCGAGTTCGAACCTCGCATCCTTCAGTAATATTTTTTTAATATACATTTTCTCTGCCATCATGGCTTAAAAAATGCTTAAAAGAAGGGAATTAGGGGGGATGGATGAACTAAGACATAACTTTCTTTTCTTCAATTCGAACTCTGTTGGGAAGAGTTGCTTTAAAAAAGACTCTCTATCCATCTATAAAATTTATTAAAACTTTTGAACTGCACAGAATGATTGGCTCACTTAGAAACAAATTTGAGCATTTCAAAGT…	CGGTCATCGAACTTGATGAAGACGGCAATATCAAGGAGTACACCAAATTAGTGAGAAAGCCTAAAACCATTTCCAAGGAGCAGAAATTAGCTTTGTTATTTAGGCCTCCATTTTCAATCATGTCCAAACTCGACTTAGACGCTGCAAAGCAAAAGGCAAGGGCAAAGCAAAAATGGATAATGATTAACATTCAGGATTCAGGAATCTTCCAATGCCAAGCCCTCAACAGGGATTTGTGGTCGTCCAGA
721	3842	3	3	0	0	NC_001134	347518	349584	NC_001137	409328	410253	|gene |tRNA note= GO_component: cytosol [goid 0005829] [evidence NAS] |gene |CDS[fcd=-674](+,347877,349382) note= Ybr056wp;	|gene gene= RSP5 note= synonyms: SMM1, UBY1, NPI1, MUT2, MDP1 |CDS[fcd=395](+,410185,412614) gene= RSP5 note= Rsp5p;	CGGAGGAGCTACTAAAGAAAGAGTGCTGCAATTAATACAATTAATATAAGTGTGGTTATTGAAAATAACTATTCATTTATACGGAGGGTTGGCCGAGTGGTCTAAGGCGGCAGACTTAAGATCTGTTGGACGGTTGTCCGCGCGAGTTCGAACCTCGCATCCTTCAGTAATATTTTTTTAATATACATTTTCTCTGCCATCATGGCTTAAAAAATGCTTAAAAGAAGGGAATTAGGGGGGATGGATGAACTAAGACATAACTTTCTTTTCTTCAATTCGAACTCTGTTGGGAAGAGTTGCTTTAAAAAAGACTCTCTATCCATCTATAAAATTTATTAAAACTTTTGAACTGCACAGAATGATTGGCTCACTTAGAAACAAATTTGAGCATTTCAAAGT…	CGGCATTGAATCATACATAGAAATCAACACAATAGCTTTGAGAACTGAGAATGTAGCTTTGACGCTGCTATTATTATTTGGTATTGTTTACCTTTTAATGTTTATTTGTTTAGAAAACAGACTGCTGGTTTGTTTACATTTGAGAGCAGAAAAAAAAAATTGCTGGCGCAGACCAGCCGCACAGTCACGTGACAGTATACGATCATGTGATCTTACGTACATAATGACATTATACGAGAAAGGGGAAAAAACAAAAATTTAGTGGAAATTTTTGGTAAAGACCAAATTGCAGTGATCTTCATGGTGAAAGGTAATATTTTTTGCTGGCGGGGGAGGGGGCTTCTATCTCGACAATTAAAAGACATACGCTTAACCATTTTTAGGGTACTCGAGTATCGC…
721	2897	25	25	0	0	NC_001134	347518	349584	NC_001136	1129058	1129142	|gene |tRNA note= GO_component: cytosol [goid 0005829] [evidence NAS] |gene |CDS[fcd=-674](+,347877,349382) note= Ybr056wp;	|gene gene= UBX5 |CDS[fcd=-1233](+,1127867,1129369) gene= UBX5 note= Ubx5p;	CGGAGGAGCTACTAAAGAAAGAGTGCTGCAATTAATACAATTAATATAAGTGTGGTTATTGAAAATAACTATTCATTTATACGGAGGGTTGGCCGAGTGGTCTAAGGCGGCAGACTTAAGATCTGTTGGACGGTTGTCCGCGCGAGTTCGAACCTCGCATCCTTCAGTAATATTTTTTTAATATACATTTTCTCTGCCATCATGGCTTAAAAAATGCTTAAAAGAAGGGAATTAGGGGGGATGGATGAACTAAGACATAACTTTCTTTTCTTCAATTCGAACTCTGTTGGGAAGAGTTGCTTTAAAAAAGACTCTCTATCCATCTATAAAATTTATTAAAACTTTTGAACTGCACAGAATGATTGGCTCACTTAGAAACAAATTTGAGCATTTCAAAGT…	CGGATCCATTCAGTACCATTGAAGCCAGGGTGCATCCAGAACCGCCAAATAAACCAGGGATCACTACAAGAATTCAAATTCGTA
721	3391	1	1	0	0	NC_001134	347518	349584	NC_001137	59887	60285	|gene |tRNA note= GO_component: cytosol [goid 0005829] [evidence NAS] |gene |CDS[fcd=-674](+,347877,349382) note= Ybr056wp;	|gene gene= RML2 |CDS[fcd=765](-,59670,60851) gene= RML2 note= Rml2p;	CGGAGGAGCTACTAAAGAAAGAGTGCTGCAATTAATACAATTAATATAAGTGTGGTTATTGAAAATAACTATTCATTTATACGGAGGGTTGGCCGAGTGGTCTAAGGCGGCAGACTTAAGATCTGTTGGACGGTTGTCCGCGCGAGTTCGAACCTCGCATCCTTCAGTAATATTTTTTTAATATACATTTTCTCTGCCATCATGGCTTAAAAAATGCTTAAAAGAAGGGAATTAGGGGGGATGGATGAACTAAGACATAACTTTCTTTTCTTCAATTCGAACTCTGTTGGGAAGAGTTGCTTTAAAAAAGACTCTCTATCCATCTATAAAATTTATTAAAACTTTTGAACTGCACAGAATGATTGGCTCACTTAGAAACAAATTTGAGCATTTCAAAGT…	CGGCTTTACCAAGAGATCTGTTTTGATGGTCAATATTGGAGACCACGCCAATGGTAGCGACAGCCTCTAAAGACACATAACGATGTTCACCGCTTTGTAATCTAACAATAGCTTTCTTTTTTTCAGGTAATTTCGCAAGGACTCTGGCATATGTACCAGCAGAGCGACAAAATTTTCCAGGTCCAACGGGTGTTATGCCAACGTTGTGAATAATAGTACCTATGGGGATCATGGAAATAGGTAGACAGTTGCCTCTTTGGGTAGTCTTAACACTCAAGATAGCAGGGTCTACTTTCCCGCCCATTTCATTCAGTAAAGTTTGAGGAATACCTCTTCTGAAGGATTCGACCACATCGCCTGGGCGTAACCCATCACAAGCAATAATATAAGACAATTCG
721	13520	1	1	0	0	NC_001134	347518	349584	NC_001148	628777	630911	|gene |tRNA note= GO_component: cytosol [goid 0005829] [evidence NAS] |gene |CDS[fcd=-674](+,347877,349382) note= Ybr056wp;	|gene gene= CSR2 note= synonym: MRG19 |CDS[fcd=-1967](+,627877,631242) gene= CSR2 note= Csr2p;	CGGAGGAGCTACTAAAGAAAGAGTGCTGCAATTAATACAATTAATATAAGTGTGGTTATTGAAAATAACTATTCATTTATACGGAGGGTTGGCCGAGTGGTCTAAGGCGGCAGACTTAAGATCTGTTGGACGGTTGTCCGCGCGAGTTCGAACCTCGCATCCTTCAGTAATATTTTTTTAATATACATTTTCTCTGCCATCATGGCTTAAAAAATGCTTAAAAGAAGGGAATTAGGGGGGATGGATGAACTAAGACATAACTTTCTTTTCTTCAATTCGAACTCTGTTGGGAAGAGTTGCTTTAAAAAAGACTCTCTATCCATCTATAAAATTTATTAAAACTTTTGAACTGCACAGAATGATTGGCTCACTTAGAAACAAATTTGAGCATTTCAAAGT…	CGGCCTCGAACAATAACACAACAGATGCGGATTCCTTTGTTGCGAGTGGCAATAACAACCCTATGAATAATAACAATTCTCCCGCGAGAAACAGACATCCTAATTCTCACTCGCGTTCTCTTCCTAATGCTTGGAATAGCCAAATGCCTTCATTCAGCTTTGCATTGATATTTTCCCTGAATAAATCAACTACCCTTTCTGATATTAAAGTAGAACTCACTTCTAACGTGAGAGTGGTGTGGTTCAATGGTCTTCCCCCTACCAAGAATGTTAACGAGGAATGCTATAATATAGGTTCTTTGGACTGGACCTTAAATGCAGACAACTTTAATCTTTTCATTCCGCAAGGCGCAAAGTCTCCTCTTGATATCGTTGAAAATCATTCCAATAACAGGAAAT…
721	2429	1	1	0	0	NC_001134	347518	349584	NC_001136	682743	683234	|gene |tRNA note= GO_component: cytosol [goid 0005829] [evidence NAS] |gene |CDS[fcd=-674](+,347877,349382) note= Ybr056wp;	|gene gene= MRPL1 |CDS[fcd=590](-,682721,683578) gene= MRPL1 note= Mrpl1p;	CGGAGGAGCTACTAAAGAAAGAGTGCTGCAATTAATACAATTAATATAAGTGTGGTTATTGAAAATAACTATTCATTTATACGGAGGGTTGGCCGAGTGGTCTAAGGCGGCAGACTTAAGATCTGTTGGACGGTTGTCCGCGCGAGTTCGAACCTCGCATCCTTCAGTAATATTTTTTTAATATACATTTTCTCTGCCATCATGGCTTAAAAAATGCTTAAAAGAAGGGAATTAGGGGGGATGGATGAACTAAGACATAACTTTCTTTTCTTCAATTCGAACTCTGTTGGGAAGAGTTGCTTTAAAAAAGACTCTCTATCCATCTATAAAATTTATTAAAACTTTTGAACTGCACAGAATGATTGGCTCACTTAGAAACAAATTTGAGCATTTCAAAGT…	CGGGGCCATGTGTGCTTGATAATGTGGTTTTACTCAGTATATTTGGTTTCTTAGATTTTTGATTATCAACAGCAGTTTTAAATGCCGCTCTAGCGGATATAATGTTTTGTAAAATTTCTCGATCAGTGAAGTAGCATTTGCCGACTCCAATGCTGATAGAGTTTCCCCTTTGCCTGAAAGGCATAGATCCTAGACTTTCTTGAAGTAAGGAGCTTATATCATCACTCACCGTACCTTTTTTGACAGAGGGTAAAACCCCACGAGGACCAAGTATCCTGGCCACCTGCGATTGTAAAGCTGGAACAATATCAGGAGTTGCAAATGCTTTGTCAAAATCAACGCTAATTTCACCGCTTTTAATTTTGGCAACAAGATCTGCTCCGCCAATCAAATGATTTG…
721	2428	4	4	0	0	NC_001134	347518	349584	NC_001136	682266	682742	|gene |tRNA note= GO_component: cytosol [goid 0005829] [evidence NAS] |gene |CDS[fcd=-674](+,347877,349382) note= Ybr056wp;	|gene |CDS(+,682172,682489) note= Ydr115wp; |gene gene= MRPL1 |CDS(-,682721,683578) gene= MRPL1 note= Mrpl1p;	CGGAGGAGCTACTAAAGAAAGAGTGCTGCAATTAATACAATTAATATAAGTGTGGTTATTGAAAATAACTATTCATTTATACGGAGGGTTGGCCGAGTGGTCTAAGGCGGCAGACTTAAGATCTGTTGGACGGTTGTCCGCGCGAGTTCGAACCTCGCATCCTTCAGTAATATTTTTTTAATATACATTTTCTCTGCCATCATGGCTTAAAAAATGCTTAAAAGAAGGGAATTAGGGGGGATGGATGAACTAAGACATAACTTTCTTTTCTTCAATTCGAACTCTGTTGGGAAGAGTTGCTTTAAAAAAGACTCTCTATCCATCTATAAAATTTATTAAAACTTTTGAACTGCACAGAATGATTGGCTCACTTAGAAACAAATTTGAGCATTTCAAAGT…	CGGTATGCTCTTAAACAGTTCACCATTGAAGACTCCGTCCTTCACACCGTTGGGATTTGGCTTAATAGGTCAAAGAAGATGGAAATCAAGGGGTAACACCTATCAACCTAGTACATTGAAACGGAAGAGAACTTTTGGTTTCTTGGCTAGGGCCAAGAGCAAACAGGGCTCTAAGATATTGAAAAGGAGGAAGCTCAAAGGTAGGTGGTTTTTGTCTCATTGAAATTTCACATACTATTCAGATAAATTTGAATACTTCTTGTACATAGGTATCTAATGATTATGCAACATACACTTTCACTATTATTCAAAAATAAAAGAGCAGTTACTTTATTCCACTTTAAAAAGACGGTTACTTTGTATGTACATGATTTTATATAAAAAGAAAGAAAATGCACC…
721	4849	49	49	2	2	NC_001134	347518	349584	NC_001139	433500	433533	|gene |tRNA note= GO_component: cytosol [goid 0005829] [evidence NAS] |gene |CDS[fcd=-674](+,347877,349382) note= Ybr056wp;	|neigh_up CDS[fcd=-449](-,431553,433067) gene= MIG1 note= Mig1p; |neigh_down CDS[fcd=3322](-,436575,436838) gene= AGA2 note= Aga2p;	CGGAGGAGCTACTAAAGAAAGAGTGCTGCAATTAATACAATTAATATAAGTGTGGTTATTGAAAATAACTATTCATTTATACGGAGGGTTGGCCGAGTGGTCTAAGGCGGCAGACTTAAGATCTGTTGGACGGTTGTCCGCGCGAGTTCGAACCTCGCATCCTTCAGTAATATTTTTTTAATATACATTTTCTCTGCCATCATGGCTTAAAAAATGCTTAAAAGAAGGGAATTAGGGGGGATGGATGAACTAAGACATAACTTTCTTTTCTTCAATTCGAACTCTGTTGGGAAGAGTTGCTTTAAAAAAGACTCTCTATCCATCTATAAAATTTATTAAAACTTTTGAACTGCACAGAATGATTGGCTCACTTAGAAACAAATTTGAGCATTTCAAAGT…	CGGCCTACGCCACTCTGGAGTTTCTCGCGGGGC
721	9094	2	2	0	0	NC_001134	347518	349584	NC_001144	618429	618936	|gene |tRNA note= GO_component: cytosol [goid 0005829] [evidence NAS] |gene |CDS[fcd=-674](+,347877,349382) note= Ybr056wp;	|gene gene= VPS34 note= synonyms: VPT29, VPL7, PEP15, END12 |CDS[fcd=-1147](+,617535,620162) gene= VPS34 note= Vps34p;	CGGAGGAGCTACTAAAGAAAGAGTGCTGCAATTAATACAATTAATATAAGTGTGGTTATTGAAAATAACTATTCATTTATACGGAGGGTTGGCCGAGTGGTCTAAGGCGGCAGACTTAAGATCTGTTGGACGGTTGTCCGCGCGAGTTCGAACCTCGCATCCTTCAGTAATATTTTTTTAATATACATTTTCTCTGCCATCATGGCTTAAAAAATGCTTAAAAGAAGGGAATTAGGGGGGATGGATGAACTAAGACATAACTTTCTTTTCTTCAATTCGAACTCTGTTGGGAAGAGTTGCTTTAAAAAAGACTCTCTATCCATCTATAAAATTTATTAAAACTTTTGAACTGCACAGAATGATTGGCTCACTTAGAAACAAATTTGAGCATTTCAAAGT…	CGGACATTAAAAAGAGGGACTACTTGAATAAAATCATCAACTACCCCCCTGGCACTAAATTAACAGCACATGAAAAGGGTTCAATATGGAAATATAGGTATTATTTGATGAACAATAAAAAAGCTCTTACAAAGTTATTACAGAGTACAAATTTGAGAGAAGAATCGGAAAGAGTAGAGGTTTTAGAACTAATGGACTCATGGGCAGAAATTGATATAGACGACGCATTAGAACTATTAGGCTCAACTTTTAAAAACCTTTCAGTGAGATCGTACGCCGTAAATAGGCTGAAGAAGGCATCAGACAAGGAGCTGGAATTGTACTTATTACAGTTGGTAGAAGCTGTCTGTTTTGAGAACCTGTCCACTTTTTCCGACAAATCTAACAGTGAATTCACTA…
721	4848	15382	15382	1	1	NC_001134	347518	349584	NC_001139	433385	433499	|gene |tRNA note= GO_component: cytosol [goid 0005829] [evidence NAS] |gene |CDS[fcd=-674](+,347877,349382) note= Ybr056wp;	|neigh_up CDS[fcd=-375](-,431553,433067) gene= MIG1 note= Mig1p; |neigh_down CDS[fcd=3396](-,436575,436838) gene= AGA2 note= Aga2p;	CGGAGGAGCTACTAAAGAAAGAGTGCTGCAATTAATACAATTAATATAAGTGTGGTTATTGAAAATAACTATTCATTTATACGGAGGGTTGGCCGAGTGGTCTAAGGCGGCAGACTTAAGATCTGTTGGACGGTTGTCCGCGCGAGTTCGAACCTCGCATCCTTCAGTAATATTTTTTTAATATACATTTTCTCTGCCATCATGGCTTAAAAAATGCTTAAAAGAAGGGAATTAGGGGGGATGGATGAACTAAGACATAACTTTCTTTTCTTCAATTCGAACTCTGTTGGGAAGAGTTGCTTTAAAAAAGACTCTCTATCCATCTATAAAATTTATTAAAACTTTTGAACTGCACAGAATGATTGGCTCACTTAGAAACAAATTTGAGCATTTCAAAGT…	CGGAGTGGGGTGGCAGTCCGCAGTCTCTCGCGAAATCAAAGGCAACAAGCAGACACGTGGAGAAAAGCCAGGAGAACTCAAGAGCTCGAACAAGTATGCTAGCAACTAAACAAG
721	10191	19	19	0	0	NC_001134	347518	349584	NC_001145	515362	516312	|gene |tRNA note= GO_component: cytosol [goid 0005829] [evidence NAS] |gene |CDS[fcd=-674](+,347877,349382) note= Ybr056wp;	|gene |CDS[fcd=-1382](+,514455,517286) note= Ymr124wp;	CGGAGGAGCTACTAAAGAAAGAGTGCTGCAATTAATACAATTAATATAAGTGTGGTTATTGAAAATAACTATTCATTTATACGGAGGGTTGGCCGAGTGGTCTAAGGCGGCAGACTTAAGATCTGTTGGACGGTTGTCCGCGCGAGTTCGAACCTCGCATCCTTCAGTAATATTTTTTTAATATACATTTTCTCTGCCATCATGGCTTAAAAAATGCTTAAAAGAAGGGAATTAGGGGGGATGGATGAACTAAGACATAACTTTCTTTTCTTCAATTCGAACTCTGTTGGGAAGAGTTGCTTTAAAAAAGACTCTCTATCCATCTATAAAATTTATTAAAACTTTTGAACTGCACAGAATGATTGGCTCACTTAGAAACAAATTTGAGCATTTCAAAGT…	CGGACAATTTCGACAGCCGCAGCAACAAAGAATGCTACCGATGAACAACTACAACAATCACCCAGGTCAATTCCAGAATACCCCACCAGTAATGCCCTCTGGACAACAGCCACCTCAGCAACCACGTACTCTGTCATTAACTAATGGCCCAAGATATTCACCCCAAAATCCTCGGCCATTCGCAGGTCATCAGCAGATATCACAAAGACAACAACAACAACAACAACAACTTCAACTTCATCCAATGTCTGAAGGCTATCGGACAATGTCTCTACAAAGTCAGAACGTTCCCCAAGGGTTTAATCCATGGTCACCAAATGACAACGATCGTAAAGCTGTGTCCATGAAACAGCCAATCAGTCAATCGTCAATTTCCTCAAAGAATAATTCAGCTTATTC…
721	11001	0	10	10	16	NC_001134	347518	349584	NC_001146	282712	282831	|gene |tRNA note= GO_component: cytosol [goid 0005829] [evidence NAS] |gene |CDS[fcd=-674](+,347877,349382) note= Ybr056wp;	|gene |CDS[fcd=-375](+,282396,283010) note= Ynl190wp;	CGGAGGAGCTACTAAAGAAAGAGTGCTGCAATTAATACAATTAATATAAGTGTGGTTATTGAAAATAACTATTCATTTATACGGAGGGTTGGCCGAGTGGTCTAAGGCGGCAGACTTAAGATCTGTTGGACGGTTGTCCGCGCGAGTTCGAACCTCGCATCCTTCAGTAATATTTTTTTAATATACATTTTCTCTGCCATCATGGCTTAAAAAATGCTTAAAAGAAGGGAATTAGGGGGGATGGATGAACTAAGACATAACTTTCTTTTCTTCAATTCGAACTCTGTTGGGAAGAGTTGCTTTAAAAAAGACTCTCTATCCATCTATAAAATTTATTAAAACTTTTGAACTGCACAGAATGATTGGCTCACTTAGAAACAAATTTGAGCATTTCAAAGT…	CGGTACTCACAAGTACGGTAAGTTCAACAAGACCTCCAAATCCAAGACTCCAAACCACACTGGTACTCACAAGTACGGTAAGTTCAACAAGACCTCCAAGTCTAAGACCCCAAACCATA
721	10999	0	18	0	3	NC_001134	347518	349584	NC_001146	281880	282651	|gene |tRNA note= GO_component: cytosol [goid 0005829] [evidence NAS] |gene |CDS[fcd=-674](+,347877,349382) note= Ybr056wp;	|gene |CDS[fcd=131](+,282396,283010) note= Ynl190wp;	CGGAGGAGCTACTAAAGAAAGAGTGCTGCAATTAATACAATTAATATAAGTGTGGTTATTGAAAATAACTATTCATTTATACGGAGGGTTGGCCGAGTGGTCTAAGGCGGCAGACTTAAGATCTGTTGGACGGTTGTCCGCGCGAGTTCGAACCTCGCATCCTTCAGTAATATTTTTTTAATATACATTTTCTCTGCCATCATGGCTTAAAAAATGCTTAAAAGAAGGGAATTAGGGGGGATGGATGAACTAAGACATAACTTTCTTTTCTTCAATTCGAACTCTGTTGGGAAGAGTTGCTTTAAAAAAGACTCTCTATCCATCTATAAAATTTATTAAAACTTTTGAACTGCACAGAATGATTGGCTCACTTAGAAACAAATTTGAGCATTTCAAAGT…	CGGTGAAAAAAAAAAAATGCGCTCCCGTACGTCAGTGGCTGTTGCTGAAACGAGACAATTTCTCAATTCGTTTGTTTGTGTACTGTATTTGTTATCTTTACTATATATATGTTGTTAAGTTTCTTTTACCAATTAGTGCTCACTTCTCTCGTCTTTTATTAGGTGTGTGTGTTGTGCGTAATTTTCGTTTCGCTGATTACTTTATATAGTGTAGTTTGTTCTTGAATGTAATAAAGACTTCTGTTTTATTTTGTTTTGTTATTTAGAAACAGTCTATCTGGTTTAACTTAAACGAGTGAGCTTAAGATAATCTGACTACAAGAAAACCAAGCTTCTATTACTTTGTTTCTTTCTCTTTTTTCTTTTTTGAATAAAGAATTTTCCTTTAAGGAGTAACTT…
721	17	0	1	0	0	NC_001134	347518	349584	NC_001133	24167	25495	|gene |tRNA note= GO_component: cytosol [goid 0005829] [evidence NAS] |gene |CDS[fcd=-674](+,347877,349382) note= Ybr056wp;	|gene gene= FLO9 |CDS[fcd=3138](-,24001,27969) gene= FLO9 note= Flo9p;	CGGAGGAGCTACTAAAGAAAGAGTGCTGCAATTAATACAATTAATATAAGTGTGGTTATTGAAAATAACTATTCATTTATACGGAGGGTTGGCCGAGTGGTCTAAGGCGGCAGACTTAAGATCTGTTGGACGGTTGTCCGCGCGAGTTCGAACCTCGCATCCTTCAGTAATATTTTTTTAATATACATTTTCTCTGCCATCATGGCTTAAAAAATGCTTAAAAGAAGGGAATTAGGGGGGATGGATGAACTAAGACATAACTTTCTTTTCTTCAATTCGAACTCTGTTGGGAAGAGTTGCTTTAAAAAAGACTCTCTATCCATCTATAAAATTTATTAAAACTTTTGAACTGCACAGAATGATTGGCTCACTTAGAAACAAATTTGAGCATTTCAAAGT…	CGGAACTTGTTAGACTCTTGGTGTTGCCAGTTTCGGATACAGAAACAACACTACTGCTGTGACCAATCACATCGGTCGCGGAAGCCGTCTGTGTTTCAGCATGATTGAATCTTGAAATTGAAGAGGTGACTACTGTTTTCGTCTCAGCAGCTCCAGTACTGGTAGTTGTCTCAGCAGCTCCAGTATTGGTTGTTGTCTCACTGGTAGCACTGTTCATTTTAGAGCTGACAGACTGTTCATTCGTAGTCTGTGGCCTCCATGTAGAATAGACCGTAACAACATCATTCACAGTAGCCGTGGCCGTCGAAACAATGGCAGGTGAAGTAGTTTCGGAACACACACCAGATCCGCAGGAAGTAACAGTAACTAGCGTAGTTTGTTGCTTCGATTCTGTGGTGG…
721	13615	0	4	0	0	NC_001134	347518	349584	NC_001148	701391	701771	|gene |tRNA note= GO_component: cytosol [goid 0005829] [evidence NAS] |gene |CDS[fcd=-674](+,347877,349382) note= Ybr056wp;	|gene gene= TEF1 |CDS[fcd=-989](+,700592,701968) gene= TEF1 note= Tef1p;	CGGAGGAGCTACTAAAGAAAGAGTGCTGCAATTAATACAATTAATATAAGTGTGGTTATTGAAAATAACTATTCATTTATACGGAGGGTTGGCCGAGTGGTCTAAGGCGGCAGACTTAAGATCTGTTGGACGGTTGTCCGCGCGAGTTCGAACCTCGCATCCTTCAGTAATATTTTTTTAATATACATTTTCTCTGCCATCATGGCTTAAAAAATGCTTAAAAGAAGGGAATTAGGGGGGATGGATGAACTAAGACATAACTTTCTTTTCTTCAATTCGAACTCTGTTGGGAAGAGTTGCTTTAAAAAAGACTCTCTATCCATCTATAAAATTTATTAAAACTTTTGAACTGCACAGAATGATTGGCTCACTTAGAAACAAATTTGAGCATTTCAAAGT…	CGGTGTCATCAAGCCAGGTATGGTTGTTACTTTTGCCCCAGCTGGTGTTACCACTGAAGTCAAGTCCGTTGAAATGCATCACGAACAATTGGAACAAGGTGTTCCAGGTGACAACGTTGGTTTCAACGTCAAGAACGTTTCCGTTAAGGAAATCAGAAGAGGTAACGTCTGTGGTGACGCTAAGAACGATCCACCAAAGGGTTGCGCTTCTTTCAACGCTACCGTCATTGTTTTGAACCATCCAGGTCAAATCTCTGCTGGTTACTCTCCAGTTTTGGATTGTCACACTGCTCACATTGCTTGTAGATTCGACGAATTGTTGGAAAAGAACGACAGAAGATCTGGTAAGAAGTTGGAAGACCATCCAAAGTTCTTGAAGT
721	14081	0	4	0	0	NC_001134	347518	349584	YSCPLASM	36	783	|gene |tRNA note= GO_component: cytosol [goid 0005829] [evidence NAS] |gene |CDS[fcd=-674](+,347877,349382) note= Ybr056wp;	|exon |conflict |conflict |repeat_region note= IR2 |conflict |conflict |conflict |misc_binding note= FLP recombinase binding site A [9] |misc_recomb |neigh_up YSCPLASM-start |neigh_down CDS[fcd=1599](-,887,2008)	CGGAGGAGCTACTAAAGAAAGAGTGCTGCAATTAATACAATTAATATAAGTGTGGTTATTGAAAATAACTATTCATTTATACGGAGGGTTGGCCGAGTGGTCTAAGGCGGCAGACTTAAGATCTGTTGGACGGTTGTCCGCGCGAGTTCGAACCTCGCATCCTTCAGTAATATTTTTTTAATATACATTTTCTCTGCCATCATGGCTTAAAAAATGCTTAAAAGAAGGGAATTAGGGGGGATGGATGAACTAAGACATAACTTTCTTTTCTTCAATTCGAACTCTGTTGGGAAGAGTTGCTTTAAAAAAGACTCTCTATCCATCTATAAAATTTATTAAAACTTTTGAACTGCACAGAATGATTGGCTCACTTAGAAACAAATTTGAGCATTTCAAAGT…	CGGCAATTCTTCAAGCAATAAACAGGAATACCAATTATTAAAAGATAACTTAGTCAGATCGTACAATAAAGCTTTGAAGAAAAATGCGCCTTATTCAATCTTTGCTATAAAAAATGGCCCAAAATCTCACATTGGAAGACATTTGATGACCTCATTTCTTTCAATGAAGGGCCTAACGGAGTTGACTAATGTTGTGGGAAATTGGAGCGATAAGCGTGCTTCTGCCGTGGCCAGGACAACGTATACTCATCAGATAACAGCAATACCTGATCACTACTTCGCACTAGTTTCTCGGTACTATGCATATGATCCAATATCAAAGGAAATGATAGCATTGAAGGATGAGACTAATCCAATTGAGGAGTGGCAGCATATAGAACAGCTAAAGGGTAGTGCTGA…
721	14082	0	1	0	0	NC_001134	347518	349584	YSCPLASM	784	1815	|gene |tRNA note= GO_component: cytosol [goid 0005829] [evidence NAS] |gene |CDS[fcd=-674](+,347877,349382) note= Ybr056wp;	|repeat_region note= IR2 |conflict |mRNA note= Rep1 mRNA (alt.) |mRNA note= Rep1 mRNA (alt.) |mRNA note= Rep1 mRNA (alt.) |mRNA note= Rep1 mRNA (alt.) |mRNA note= Rep1 mRNA (alt.) |mRNA note= Rep1 mRNA (alt.) |CDS[fcd=709](-,887,2008)	CGGAGGAGCTACTAAAGAAAGAGTGCTGCAATTAATACAATTAATATAAGTGTGGTTATTGAAAATAACTATTCATTTATACGGAGGGTTGGCCGAGTGGTCTAAGGCGGCAGACTTAAGATCTGTTGGACGGTTGTCCGCGCGAGTTCGAACCTCGCATCCTTCAGTAATATTTTTTTAATATACATTTTCTCTGCCATCATGGCTTAAAAAATGCTTAAAAGAAGGGAATTAGGGGGGATGGATGAACTAAGACATAACTTTCTTTTCTTCAATTCGAACTCTGTTGGGAAGAGTTGCTTTAAAAAAGACTCTCTATCCATCTATAAAATTTATTAAAACTTTTGAACTGCACAGAATGATTGGCTCACTTAGAAACAAATTTGAGCATTTCAAAGT…	CGGACTGTAACGAGCTACTAAAATATTGCGAATACCGCTTCCACAAACATTGCTCAAAAGTATCTCTTTGCTATATATCTCTGTGCTATATCCCTATATAACCTACCCATCCACCTTTCGCTCCTTGAACTTGCATCTAAACTCGACCTCTACATCAACAGGCTTCCAATGCTCTTCAAATTTTACTGTCAAGTAGACCCATACGGCTGTAATATGCTGCTCTTCATAATGTAAGCTTATCTTTATCGAATCGTGTGAAAAACTACTACCGCGATAAACCTTTACGGTTCCCTGAGATTGAATTAGTTCCTTTAGTATATGATACAAGACACTTTTGAACTTTGTACGACGAATTTTGAGGTTCGCCATCCTCTGGCTATTTCCAATTATCCTGTCGGC…
721	2237	0	180	0	6	NC_001134	347518	349584	NC_001136	519230	521006	|gene |tRNA note= GO_component: cytosol [goid 0005829] [evidence NAS] |gene |CDS[fcd=-674](+,347877,349382) note= Ybr056wp;	|repeat_region note= Transposon YDRCTY2-1; Long Terminal Repeat (LTR) |gene note= Ydr034c-dp; |gene |CDS(-,518037,519353) note= Ydr034c-cp; |LTR note= YDRCDELTA5 |gene |tRNA note= GO_component: cytosol [goid 0005829] [evidence NAS] |LTR note= YDRCDELTA6A |LTR note= YDRWDELTA7 |gene |CDS(-,520513,520689) note= Ydr034c-ap; |LTR note= YDRCDELTA6B |gene |tRNA note= GO_component: cytosol [goid 0005829…	CGGAGGAGCTACTAAAGAAAGAGTGCTGCAATTAATACAATTAATATAAGTGTGGTTATTGAAAATAACTATTCATTTATACGGAGGGTTGGCCGAGTGGTCTAAGGCGGCAGACTTAAGATCTGTTGGACGGTTGTCCGCGCGAGTTCGAACCTCGCATCCTTCAGTAATATTTTTTTAATATACATTTTCTCTGCCATCATGGCTTAAAAAATGCTTAAAAGAAGGGAATTAGGGGGGATGGATGAACTAAGACATAACTTTCTTTTCTTCAATTCGAACTCTGTTGGGAAGAGTTGCTTTAAAAAAGACTCTCTATCCATCTATAAAATTTATTAAAACTTTTGAACTGCACAGAATGATTGGCTCACTTAGAAACAAATTTGAGCATTTCAAAGT…	CGGTAAATTGGAAGCTGAAACGGCTAACGGATCTTGATTTGATGGGACTTCCTTAGAAGTAACCGAAGCATAGGCGCTACCATGAAGATTGGGTGAATTTTGAGATAATTGTTGGGATTCCATTTTTAATAAGGCAATAATATTAGGTATGTAGATATACTAGAAGTTCTCCTCCAGGATTTAGGAATCCATAAAAGGGAATCTGCAATTCTACACAATTCTATAAATATTATTATCATCATTTTATATGTTAATATTCATTGATCCTATTACATTATCAATCCTTGCGTTTCAGCTTCCACTAATTTAGATGACTATTTCTCATCATTTGCGTCATCTTCTAACACCGTATATGATAATATACTAGTAACGTAAATACTAGTTAGTAGATGATAGTTG…
721	8302	0	1	0	278	NC_001134	347518	349584	NC_001143	658791	658984	|gene |tRNA note= GO_component: cytosol [goid 0005829] [evidence NAS] |gene |CDS[fcd=-674](+,347877,349382) note= Ybr056wp;	|gene |CDS[fcd=1215](-,658354,660102) note= Ykr105cp;	CGGAGGAGCTACTAAAGAAAGAGTGCTGCAATTAATACAATTAATATAAGTGTGGTTATTGAAAATAACTATTCATTTATACGGAGGGTTGGCCGAGTGGTCTAAGGCGGCAGACTTAAGATCTGTTGGACGGTTGTCCGCGCGAGTTCGAACCTCGCATCCTTCAGTAATATTTTTTTAATATACATTTTCTCTGCCATCATGGCTTAAAAAATGCTTAAAAGAAGGGAATTAGGGGGGATGGATGAACTAAGACATAACTTTCTTTTCTTCAATTCGAACTCTGTTGGGAAGAGTTGCTTTAAAAAAGACTCTCTATCCATCTATAAAATTTATTAAAACTTTTGAACTGCACAGAATGATTGGCTCACTTAGAAACAAATTTGAGCATTTCAAAGT…	CGGTAATAGCAAAACACCAATTTGAGTTGACTTCGTGGACGTATTTGTCATAAGTGTCATAAGCCCTGCTCCAATTACCCCAAGAACGCCTCCAAATATTAAGAGTGGTTTAACTAAACCGAGCTTTTTGGTAATCACACCACTTGCAATGGCCGCAATAACGTTGGTAATAACGATTGGTATCAAGTGAAGA
721	2700	0	79	0	1585	NC_001134	347518	349584	NC_001136	945976	946388	|gene |tRNA note= GO_component: cytosol [goid 0005829] [evidence NAS] |gene |CDS[fcd=-674](+,347877,349382) note= Ybr056wp;	|LTR note= YDRCSIGMA3 |gene gene= SUP2 gene= SUP2 note= GO_component: cytosol [goid 0005829] [evidence NAS] |neigh_up CDS[fcd=-1034](-,943670,945148) gene= SNU56 note= Snu56p; |neigh_down CDS[fcd=621](+,946803,948452) gene= AMD2 note= Amd2p;	CGGAGGAGCTACTAAAGAAAGAGTGCTGCAATTAATACAATTAATATAAGTGTGGTTATTGAAAATAACTATTCATTTATACGGAGGGTTGGCCGAGTGGTCTAAGGCGGCAGACTTAAGATCTGTTGGACGGTTGTCCGCGCGAGTTCGAACCTCGCATCCTTCAGTAATATTTTTTTAATATACATTTTCTCTGCCATCATGGCTTAAAAAATGCTTAAAAGAAGGGAATTAGGGGGGATGGATGAACTAAGACATAACTTTCTTTTCTTCAATTCGAACTCTGTTGGGAAGAGTTGCTTTAAAAAAGACTCTCTATCCATCTATAAAATTTATTAAAACTTTTGAACTGCACAGAATGATTGGCTCACTTAGAAACAAATTTGAGCATTTCAAAGT…	CGGAGTGTTTTGACAATCCTAATATAAACAGTCTTAGGGAAGTAACCAGTTGTCAAAACAGTTTATCAGATTAATTCACGGAATGTTACTTATCTTATATATTATATAAAATATGAATCATACTAAGTGGTGGAAGCGCGGAATCTCGGATCTAAACTAATTGTTCAGGCATTTATACTTTTGGGTAGTTCAGCTAGGGAAGGACGGGTTTTGTCTCATGTTGTTCGTTTTGTTATAAGGTTGTTTCATATGTGTTTTATGAACGTTTAGGATGACGTATTGTCATACTGACGTATCTCATTTTGAGATACAACACCTCGCAAGAAATCGACTCTCGGTAGCCAAGTTGGTTTAAGGCGCAAGACTGTAATTTATCACTACGAAATCTTGAGATCGGGC…
721	3780	0	13	0	0	NC_001134	347518	349584	NC_001137	363280	363579	|gene |tRNA note= GO_component: cytosol [goid 0005829] [evidence NAS] |gene |CDS[fcd=-674](+,347877,349382) note= Ybr056wp;	|gene gene= RPS8B |CDS[fcd=-333](+,363096,363698) gene= RPS8B note= Rps8bp;	CGGAGGAGCTACTAAAGAAAGAGTGCTGCAATTAATACAATTAATATAAGTGTGGTTATTGAAAATAACTATTCATTTATACGGAGGGTTGGCCGAGTGGTCTAAGGCGGCAGACTTAAGATCTGTTGGACGGTTGTCCGCGCGAGTTCGAACCTCGCATCCTTCAGTAATATTTTTTTAATATACATTTTCTCTGCCATCATGGCTTAAAAAATGCTTAAAAGAAGGGAATTAGGGGGGATGGATGAACTAAGACATAACTTTCTTTTCTTCAATTCGAACTCTGTTGGGAAGAGTTGCTTTAAAAAAGACTCTCTATCCATCTATAAAATTTATTAAAACTTTTGAACTGCACAGAATGATTGGCTCACTTAGAAACAAATTTGAGCATTTCAAAGT…	CGGTAACTTTTCTTGGGCTTCTGAAGGTATCTCCAAGAAGACCAGAATTGCTGGTGTTGTTTACCATCCATCCAACAATGAATTGGTTAGAACTAACACTTTGACCAAGGCTGCCATTGTCCAAATTGATGCTACTCCATTCAGACAATGGTTCGAAGCTCACTACGGTCAAACCTTGGGTAAGAAGAAGAACGTCAAGGAAGAAGAAACTGTTGCCAAGAGCAAGAACGCTGAAAGAAAGTGGGCTGCTAGAGCTGCTTCTGCCAAGATCGAATCTTCCGTTGAATCTCAATTCAGCG
721	1631	0	3	0	2	NC_001134	347518	349584	NC_001136	15044	15824	|gene |tRNA note= GO_component: cytosol [goid 0005829] [evidence NAS] |gene |CDS[fcd=-674](+,347877,349382) note= Ybr056wp;	|rep_origin note= ARS403 |neigh_up CDS[fcd=-2074](-,11657,13360) gene= HXT15 note= Hxt15p; |neigh_down CDS[fcd=770](+,16204,17226) gene= THI13 note= Thi13p;	CGGAGGAGCTACTAAAGAAAGAGTGCTGCAATTAATACAATTAATATAAGTGTGGTTATTGAAAATAACTATTCATTTATACGGAGGGTTGGCCGAGTGGTCTAAGGCGGCAGACTTAAGATCTGTTGGACGGTTGTCCGCGCGAGTTCGAACCTCGCATCCTTCAGTAATATTTTTTTAATATACATTTTCTCTGCCATCATGGCTTAAAAAATGCTTAAAAGAAGGGAATTAGGGGGGATGGATGAACTAAGACATAACTTTCTTTTCTTCAATTCGAACTCTGTTGGGAAGAGTTGCTTTAAAAAAGACTCTCTATCCATCTATAAAATTTATTAAAACTTTTGAACTGCACAGAATGATTGGCTCACTTAGAAACAAATTTGAGCATTTCAAAGT…	CGGGAATCTTGTTGCCATAAGGTGCTTTTATGATATCAAACCAGGGGGGAGAATATTTGGGAAGTAATTGGGAAGTAATTGTATGTATTTCTAAAATTTTTGGATACTCAACTTTTAAATTCAAAATAGTTATATTTGTTATCGAAATGTAGTAGAAATATTCTAAGTAACCAATTTCAAAACTGCATCTATCTTTGGATAAACTGGTGTGATAAGATATACATTGAATGCTGATGTCCATCACACATATGTTTACACTGGCGTCGCTCTGTACCTATTTCAGAATAGATTAATGACAAAGTAAAAGTTCAATAGGCGGGCGGAAAAAATTAGAGATTCATTGAATCTCTAATTTATTTAAAGTTTATAAGTCGTTACATATTTTTCTATGGTAAGTTC…
721	2215	0	286	0	0	NC_001134	347518	349584	NC_001136	492065	492673	|gene |tRNA note= GO_component: cytosol [goid 0005829] [evidence NAS] |gene |CDS[fcd=-674](+,347877,349382) note= Ybr056wp;	|gene gene= RPS11A gene= RPS11A note= Rps11ap; |gene |CDS[fcd=1896](-,492553,494265) note= Ydr026cp;	CGGAGGAGCTACTAAAGAAAGAGTGCTGCAATTAATACAATTAATATAAGTGTGGTTATTGAAAATAACTATTCATTTATACGGAGGGTTGGCCGAGTGGTCTAAGGCGGCAGACTTAAGATCTGTTGGACGGTTGTCCGCGCGAGTTCGAACCTCGCATCCTTCAGTAATATTTTTTTAATATACATTTTCTCTGCCATCATGGCTTAAAAAATGCTTAAAAGAAGGGAATTAGGGGGGATGGATGAACTAAGACATAACTTTCTTTTCTTCAATTCGAACTCTGTTGGGAAGAGTTGCTTTAAAAAAGACTCTCTATCCATCTATAAAATTTATTAAAACTTTTGAACTGCACAGAATGATTGGCTCACTTAGAAACAAATTTGAGCATTTCAAAGT…	CGGTACCGTCGTCTCCACCAAGATGCACCGTACCATTGTCATCAGAAGGGCTTACTTGCATTACATTCCAAAGTACAACAGATACGAAAAGAGACACAAGAACGTTCCAGTTCACGTTTCCCCAGCTTTCCGTGTCCAAGTTGGTGACATCGTTACCGTCGGCCAATGTAGACCAATCTCCAAGACTGTTAGATTCAACGTTGTCAAGGTCTCTGCTGCTGCTGGTAAGGCTAACAAACAATTTGCTAAATTTTAAGCTGGTTATGAATCAGCATAAGACTTACGTAACTGTTTATTTTATAATTATTTGTATAATGTACTAAAAATATAAATTCAATAATCTCCACTTCTGCAAGAAGCAAATGTACTATGAAGTGAATATTTCACCTTGTAATGATG…
721	11914	0	77	0	1611	NC_001134	347518	349584	NC_001147	287485	288273	|gene |tRNA note= GO_component: cytosol [goid 0005829] [evidence NAS] |gene |CDS[fcd=-674](+,347877,349382) note= Ybr056wp;	|gene gene= TAT2 note= synonyms: TAP2, SCM2, SAB2, LTG3 |CDS[fcd=-1706](+,286173,287951) gene= TAT2 note= Tat2p; |gene gene= SUP3 gene= SUP3 note= GO_component: cytosol [goid 0005829] [evidence NAS]	CGGAGGAGCTACTAAAGAAAGAGTGCTGCAATTAATACAATTAATATAAGTGTGGTTATTGAAAATAACTATTCATTTATACGGAGGGTTGGCCGAGTGGTCTAAGGCGGCAGACTTAAGATCTGTTGGACGGTTGTCCGCGCGAGTTCGAACCTCGCATCCTTCAGTAATATTTTTTTAATATACATTTTCTCTGCCATCATGGCTTAAAAAATGCTTAAAAGAAGGGAATTAGGGGGGATGGATGAACTAAGACATAACTTTCTTTTCTTCAATTCGAACTCTGTTGGGAAGAGTTGCTTTAAAAAAGACTCTCTATCCATCTATAAAATTTATTAAAACTTTTGAACTGCACAGAATGATTGGCTCACTTAGAAACAAATTTGAGCATTTCAAAGT…	CGGCCTGGCCACGTGCATTGTCTGGTTGAGCATCAACCTGTCACATATCAGATTTAGACTGGCGATGAAGGCTCAAGGGAAGTCTCTGGATGAATTAGAATTTGTTAGTGCTGTCGGGATTTGGGGATCAGCGTATTCCGCTTTAATCAACTGTCTAATCTTGATAGCTCAATTCTATTGTTCACTATGGCCCATTGGTGGCTGGACCAGCGGCAAAGAAAGGGCTAAAATATTTTTTCAAAATTATCTGTGTGCCTTAATCATGTTATTTATATTCATCGTCCACAAAATTTATTACAAGTGTCAAACAGGCAAATGGTGGGGGGTTAAGGCGTTAAAGGACATAGATTTGGAAACCGATCGTAAAGATATCGACATCGAAATAGTCAAGCAAGAAAT…
721	2264	0	6	0	0	NC_001134	347518	349584	NC_001136	535434	536338	|gene |tRNA note= GO_component: cytosol [goid 0005829] [evidence NAS] |gene |CDS[fcd=-674](+,347877,349382) note= Ybr056wp;	|gene gene= ENA1 note= synonyms: PMR2, HOR6 |CDS[fcd=2578](-,535189,538464) gene= ENA1 note= Ena1p;	CGGAGGAGCTACTAAAGAAAGAGTGCTGCAATTAATACAATTAATATAAGTGTGGTTATTGAAAATAACTATTCATTTATACGGAGGGTTGGCCGAGTGGTCTAAGGCGGCAGACTTAAGATCTGTTGGACGGTTGTCCGCGCGAGTTCGAACCTCGCATCCTTCAGTAATATTTTTTTAATATACATTTTCTCTGCCATCATGGCTTAAAAAATGCTTAAAAGAAGGGAATTAGGGGGGATGGATGAACTAAGACATAACTTTCTTTTCTTCAATTCGAACTCTGTTGGGAAGAGTTGCTTTAAAAAAGACTCTCTATCCATCTATAAAATTTATTAAAACTTTTGAACTGCACAGAATGATTGGCTCACTTAGAAACAAATTTGAGCATTTCAAAGT…	CGGAATATAGACGACGGGGAAGGCTGACACAAATCCAAAAATGATTGACCAGAACAAAAACTGGTTTCCCCAAATGCTTCTGAAAAATTCCTTGACTGGGCTGTCAGTGTCTGGATGCATTCTGAAAAAGGATCTTCTCATGTCAACCACTTCCCAAGCCAGAATCAAAGCGCACCACGTCATGGTTGCGAAAGCCGCAGAACGTGATCTATAAACATCACGACAACTGCTGTTATAGGTGCCATCACAATCGTGCCCCAATCTACCACTATTTATTCCATACAGTGATCCAGTAAATGAAGCCATACAGGACCCTGTCATTATAATCCCATATGCAAATGTATCTATAATAACCTCCCACGTGAAAATACCAACCTCTGAATCATGAGGAGGTCTATC…
721	2265	0	52	0	0	NC_001134	347518	349584	NC_001136	536339	536494	|gene |tRNA note= GO_component: cytosol [goid 0005829] [evidence NAS] |gene |CDS[fcd=-674](+,347877,349382) note= Ybr056wp;	|gene gene= ENA1 note= synonyms: PMR2, HOR6 |CDS[fcd=2048](-,535189,538464) gene= ENA1 note= Ena1p;	CGGAGGAGCTACTAAAGAAAGAGTGCTGCAATTAATACAATTAATATAAGTGTGGTTATTGAAAATAACTATTCATTTATACGGAGGGTTGGCCGAGTGGTCTAAGGCGGCAGACTTAAGATCTGTTGGACGGTTGTCCGCGCGAGTTCGAACCTCGCATCCTTCAGTAATATTTTTTTAATATACATTTTCTCTGCCATCATGGCTTAAAAAATGCTTAAAAGAAGGGAATTAGGGGGGATGGATGAACTAAGACATAACTTTCTTTTCTTCAATTCGAACTCTGTTGGGAAGAGTTGCTTTAAAAAAGACTCTCTATCCATCTATAAAATTTATTAAAACTTTTGAACTGCACAGAATGATTGGCTCACTTAGAAACAAATTTGAGCATTTCAAAGT…	CGGTCATGACCATACTGTCAACAATCTCTTGGGAGTAATGGTACAAATTGGTGGGTAAGATGCCAACCTCCTGAGCGATAGCCTTTGCTGTACCCACAAAGTCCCCAGTTAACATATGAACGTTAATACCAGCTTGGTGAAACTTCTTGACTGCA
721	2263	0	206	0	4	NC_001134	347518	349584	NC_001136	535287	535433	|gene |tRNA note= GO_component: cytosol [goid 0005829] [evidence NAS] |gene |CDS[fcd=-674](+,347877,349382) note= Ybr056wp;	|gene gene= ENA1 note= synonyms: PMR2, HOR6 |CDS[fcd=3104](-,535189,538464) gene= ENA1 note= Ena1p;	CGGAGGAGCTACTAAAGAAAGAGTGCTGCAATTAATACAATTAATATAAGTGTGGTTATTGAAAATAACTATTCATTTATACGGAGGGTTGGCCGAGTGGTCTAAGGCGGCAGACTTAAGATCTGTTGGACGGTTGTCCGCGCGAGTTCGAACCTCGCATCCTTCAGTAATATTTTTTTAATATACATTTTCTCTGCCATCATGGCTTAAAAAATGCTTAAAAGAAGGGAATTAGGGGGGATGGATGAACTAAGACATAACTTTCTTTTCTTCAATTCGAACTCTGTTGGGAAGAGTTGCTTTAAAAAAGACTCTCTATCCATCTATAAAATTTATTAAAACTTTTGAACTGCACAGAATGATTGGCTCACTTAGAAACAAATTTGAGCATTTCAAAGT…	CGGGTTGTGCGCTCTCTGAGTTTTGAAATAGCGCCTCTTTCCACACTTGTAAAGTTCAGCACCTATCCAGAATGCAATTGTGAATGCAATGGCGAGACCCCATTCAGCACCAATTGGTTTATGCAAAAACACTTTATCATTAATAA
721	3770	0	2	0	0	NC_001134	347518	349584	NC_001137	354976	355149	|gene |tRNA note= GO_component: cytosol [goid 0005829] [evidence NAS] |gene |CDS[fcd=-674](+,347877,349382) note= Ybr056wp;	|gene |tRNA note= GO_component: cytosol [goid 0005829] [evidence NAS] |neigh_up CDS[fcd=-3368](+,351694,353232) gene= SHC1 note= Shc1p; |neigh_down CDS[fcd=400](+,355462,357726) gene= UBP9 note= Ubp9p;	CGGAGGAGCTACTAAAGAAAGAGTGCTGCAATTAATACAATTAATATAAGTGTGGTTATTGAAAATAACTATTCATTTATACGGAGGGTTGGCCGAGTGGTCTAAGGCGGCAGACTTAAGATCTGTTGGACGGTTGTCCGCGCGAGTTCGAACCTCGCATCCTTCAGTAATATTTTTTTAATATACATTTTCTCTGCCATCATGGCTTAAAAAATGCTTAAAAGAAGGGAATTAGGGGGGATGGATGAACTAAGACATAACTTTCTTTTCTTCAATTCGAACTCTGTTGGGAAGAGTTGCTTTAAAAAAGACTCTCTATCCATCTATAAAATTTATTAAAACTTTTGAACTGCACAGAATGATTGGCTCACTTAGAAACAAATTTGAGCATTTCAAAGT…	CGGGGTTCGACTCCCCGTATCGGAGTACTTTTTTGACATCATACAGTGTATGTATGGGGTTAGGAGCCACCTTCCAACAAAGCATCACGCTGTCGTATCTCAATTGTCCTTCAGCAAAAGAAAAAGCAGTTGGGCTCCTGTACGCCATATATACTTTATATGCGGTTTTTACC
721	2256	0	171	0	4	NC_001134	347518	349584	NC_001136	531402	531548	|gene |tRNA note= GO_component: cytosol [goid 0005829] [evidence NAS] |gene |CDS[fcd=-674](+,347877,349382) note= Ybr056wp;	|gene gene= ENA2 |CDS[fcd=3104](-,531304,534579) gene= ENA2 note= Ena2p;	CGGAGGAGCTACTAAAGAAAGAGTGCTGCAATTAATACAATTAATATAAGTGTGGTTATTGAAAATAACTATTCATTTATACGGAGGGTTGGCCGAGTGGTCTAAGGCGGCAGACTTAAGATCTGTTGGACGGTTGTCCGCGCGAGTTCGAACCTCGCATCCTTCAGTAATATTTTTTTAATATACATTTTCTCTGCCATCATGGCTTAAAAAATGCTTAAAAGAAGGGAATTAGGGGGGATGGATGAACTAAGACATAACTTTCTTTTCTTCAATTCGAACTCTGTTGGGAAGAGTTGCTTTAAAAAAGACTCTCTATCCATCTATAAAATTTATTAAAACTTTTGAACTGCACAGAATGATTGGCTCACTTAGAAACAAATTTGAGCATTTCAAAGT…	CGGGTTGTGCGCTCTCTGAGTTTTGAAATAGCGCCTCTTTCCACACTTGTAAAGTTCAGCACCTATCCAGAATGCAATTGTGAATGCAATGGCGAGACCCCATTCAGCACCAATTGGTTTATGCAAAAACACTTTATCATTAATAA
721	2257	0	3	0	0	NC_001134	347518	349584	NC_001136	531549	532453	|gene |tRNA note= GO_component: cytosol [goid 0005829] [evidence NAS] |gene |CDS[fcd=-674](+,347877,349382) note= Ybr056wp;	|gene gene= ENA2 |CDS[fcd=2578](-,531304,534579) gene= ENA2 note= Ena2p;	CGGAGGAGCTACTAAAGAAAGAGTGCTGCAATTAATACAATTAATATAAGTGTGGTTATTGAAAATAACTATTCATTTATACGGAGGGTTGGCCGAGTGGTCTAAGGCGGCAGACTTAAGATCTGTTGGACGGTTGTCCGCGCGAGTTCGAACCTCGCATCCTTCAGTAATATTTTTTTAATATACATTTTCTCTGCCATCATGGCTTAAAAAATGCTTAAAAGAAGGGAATTAGGGGGGATGGATGAACTAAGACATAACTTTCTTTTCTTCAATTCGAACTCTGTTGGGAAGAGTTGCTTTAAAAAAGACTCTCTATCCATCTATAAAATTTATTAAAACTTTTGAACTGCACAGAATGATTGGCTCACTTAGAAACAAATTTGAGCATTTCAAAGT…	CGGAATATAGACGACGGGGAAGGCTGACACAAATCCAAAAATGATTGACCAGAACAAAAACTGGTTTCCCCAAATACTTCTGAAAAATTCCTTGACTGGGCTGTCAGTGTCTGGATGCATTCTGAAAAAGGATCTTCTCATGTCAACCACTTCCCAAGCCAGAATCAAAGCGCACCACGTCATGGTTGCGAAAGCCGCAGAACGTGATCTATAAACATCACGACAACTGCTGTTATAGGTGCCATCACAATCGTGCCCCAATCTACCACTATTTATTCCATACAGTGATCCAGTAAATGAAGCCATACAGGACCCTGTCATTATAATCCCATATGCAAATGTATCTATAATAACCTCCCACGTGAAAATACCAACCTCTGAATCATGAGGAGGTCTATC…
721	2258	0	66	0	0	NC_001134	347518	349584	NC_001136	532454	532609	|gene |tRNA note= GO_component: cytosol [goid 0005829] [evidence NAS] |gene |CDS[fcd=-674](+,347877,349382) note= Ybr056wp;	|gene gene= ENA2 |CDS[fcd=2048](-,531304,534579) gene= ENA2 note= Ena2p;	CGGAGGAGCTACTAAAGAAAGAGTGCTGCAATTAATACAATTAATATAAGTGTGGTTATTGAAAATAACTATTCATTTATACGGAGGGTTGGCCGAGTGGTCTAAGGCGGCAGACTTAAGATCTGTTGGACGGTTGTCCGCGCGAGTTCGAACCTCGCATCCTTCAGTAATATTTTTTTAATATACATTTTCTCTGCCATCATGGCTTAAAAAATGCTTAAAAGAAGGGAATTAGGGGGGATGGATGAACTAAGACATAACTTTCTTTTCTTCAATTCGAACTCTGTTGGGAAGAGTTGCTTTAAAAAAGACTCTCTATCCATCTATAAAATTTATTAAAACTTTTGAACTGCACAGAATGATTGGCTCACTTAGAAACAAATTTGAGCATTTCAAAGT…	CGGTCATGACCATACTGTCAACAATCTCTTGGGAGTAATGGTACAAATTGGTGGGTAAGATGCCAACCTCCTGAGCGATAGCCTTTGCTGTACCCACAAAGTCCCCAGTTAACATATGAACGTTAATACCAGCTTGGTGAAACTTCTTGACTGCA
721	2251	0	50	0	0	NC_001134	347518	349584	NC_001136	528569	528724	|gene |tRNA note= GO_component: cytosol [goid 0005829] [evidence NAS] |gene |CDS[fcd=-674](+,347877,349382) note= Ybr056wp;	|gene gene= ENA5 |CDS[fcd=2048](-,527419,530694) gene= ENA5 note= Ena5p;	CGGAGGAGCTACTAAAGAAAGAGTGCTGCAATTAATACAATTAATATAAGTGTGGTTATTGAAAATAACTATTCATTTATACGGAGGGTTGGCCGAGTGGTCTAAGGCGGCAGACTTAAGATCTGTTGGACGGTTGTCCGCGCGAGTTCGAACCTCGCATCCTTCAGTAATATTTTTTTAATATACATTTTCTCTGCCATCATGGCTTAAAAAATGCTTAAAAGAAGGGAATTAGGGGGGATGGATGAACTAAGACATAACTTTCTTTTCTTCAATTCGAACTCTGTTGGGAAGAGTTGCTTTAAAAAAGACTCTCTATCCATCTATAAAATTTATTAAAACTTTTGAACTGCACAGAATGATTGGCTCACTTAGAAACAAATTTGAGCATTTCAAAGT…	CGGTCATGACCATACTGTCAACAATCTCTTGGGAGTAATGGTACAAATTGGTGGGTAAGATGCCAACCTCCTGAGCGATAGCCTTTGCTGTACCCACAAAGTCCCCAGTTAACATATGAACGTTAATACCAGCTTGGTGAAACTTCTTGACTGCA
721	2250	0	2	0	0	NC_001134	347518	349584	NC_001136	527664	528568	|gene |tRNA note= GO_component: cytosol [goid 0005829] [evidence NAS] |gene |CDS[fcd=-674](+,347877,349382) note= Ybr056wp;	|gene gene= ENA5 |CDS[fcd=2578](-,527419,530694) gene= ENA5 note= Ena5p;	CGGAGGAGCTACTAAAGAAAGAGTGCTGCAATTAATACAATTAATATAAGTGTGGTTATTGAAAATAACTATTCATTTATACGGAGGGTTGGCCGAGTGGTCTAAGGCGGCAGACTTAAGATCTGTTGGACGGTTGTCCGCGCGAGTTCGAACCTCGCATCCTTCAGTAATATTTTTTTAATATACATTTTCTCTGCCATCATGGCTTAAAAAATGCTTAAAAGAAGGGAATTAGGGGGGATGGATGAACTAAGACATAACTTTCTTTTCTTCAATTCGAACTCTGTTGGGAAGAGTTGCTTTAAAAAAGACTCTCTATCCATCTATAAAATTTATTAAAACTTTTGAACTGCACAGAATGATTGGCTCACTTAGAAACAAATTTGAGCATTTCAAAGT…	CGGAATATAGACGACGGGGAAGGCTGACACAAATCCAAAAATGATTGACCAGAACAAAAACTGGTTTCCCCAAATACTTCTGAAAAATTCCTTGACTGGGCTGTCAGTGTCTGGATGCATTCTGAAAAAAGATCTTCTCATGTCAACCACTTCCCAAGCCAGAATCAAAGCGCACCACGTCATAGTTGCGAAAGCCGCAGAACGTGATCTATAAACATCACGACAACTGCTGTTATAGGTGCCATCACAATCGTGCCCCAATCTACCACTATTTATTCCATACAGTGATCCAGTAAATGAAGCCATACAGGACCCTGTCATTATAATCCCATATGCAAATGTATCTATAATAACCTCCCATGTGAAAATACCAACCTCTGAATCATTAGGAGGTCTATC…
721	7121	0	132	0	5449	NC_001134	347518	349584	NC_001142	353675	354319	|gene |tRNA note= GO_component: cytosol [goid 0005829] [evidence NAS] |gene |CDS[fcd=-674](+,347877,349382) note= Ybr056wp;	|gene gene= SUP7 gene= SUP7 note= GO_component: cytosol [goid 0005829] [evidence NAS] |neigh_up CDS[fcd=-1616](+,352381,353610) gene= AIM22 note= Aim22p; |neigh_down CDS[fcd=2022](+,356019,357923) note= Yjl045wp;	CGGAGGAGCTACTAAAGAAAGAGTGCTGCAATTAATACAATTAATATAAGTGTGGTTATTGAAAATAACTATTCATTTATACGGAGGGTTGGCCGAGTGGTCTAAGGCGGCAGACTTAAGATCTGTTGGACGGTTGTCCGCGCGAGTTCGAACCTCGCATCCTTCAGTAATATTTTTTTAATATACATTTTCTCTGCCATCATGGCTTAAAAAATGCTTAAAAGAAGGGAATTAGGGGGGATGGATGAACTAAGACATAACTTTCTTTTCTTCAATTCGAACTCTGTTGGGAAGAGTTGCTTTAAAAAAGACTCTCTATCCATCTATAAAATTTATTAAAACTTTTGAACTGCACAGAATGATTGGCTCACTTAGAAACAAATTTGAGCATTTCAAAGT…	CGGAAACTGATTCAGCATATTTCAGCAGACGCGTCCTAGATTCACAGCAAACTTCAATATAAGCGATACATTAGGAGTGTTCGTACTTTAGATCTATAAGAACTATATTTTGTTACGATTCAGCCGTCTCTAAATGTGAACTAAATATTTATACTGTTATTTGAGAAACCGACAGATAGTACTTAATTTTATCGATCATCTAAGAATAGCATCGGTATTGTGGTGACATTTATTGAATTTCTTCCGCTCCAGAATAAAGTTCCTTTTCACTTCAAAAAACTGCCACCAGTAAAGTTGCACCAGTGGTTTTTGAGCATTTTTTGTCAATGTCGCTTAACCGTTCTTGAACTGTATCCTCTTGACGTCGATAAAATCATTTGTAAAAACCAGGCCAAATCA…
721	4976	0	1	0	0	NC_001134	347518	349584	NC_001139	541900	542389	|gene |tRNA note= GO_component: cytosol [goid 0005829] [evidence NAS] |gene |CDS[fcd=-674](+,347877,349382) note= Ybr056wp;	|gene |tRNA note= GO_component: cytosol [goid 0005829] [evidence NAS] |gene gene= MSP1 note= synonym: YTA4 |CDS[fcd=63](+,542207,543295) gene= MSP1 note= Msp1p;	CGGAGGAGCTACTAAAGAAAGAGTGCTGCAATTAATACAATTAATATAAGTGTGGTTATTGAAAATAACTATTCATTTATACGGAGGGTTGGCCGAGTGGTCTAAGGCGGCAGACTTAAGATCTGTTGGACGGTTGTCCGCGCGAGTTCGAACCTCGCATCCTTCAGTAATATTTTTTTAATATACATTTTCTCTGCCATCATGGCTTAAAAAATGCTTAAAAGAAGGGAATTAGGGGGGATGGATGAACTAAGACATAACTTTCTTTTCTTCAATTCGAACTCTGTTGGGAAGAGTTGCTTTAAAAAAGACTCTCTATCCATCTATAAAATTTATTAAAACTTTTGAACTGCACAGAATGATTGGCTCACTTAGAAACAAATTTGAGCATTTCAAAGT…	CGGGGTTCGACTCCCCGTATCGGAGTGTTCTTTTTCTTACCTCTTGAAAAAGAGGTAGTAAAGTCAATATAAATTCTTGGCTGAAGTATTTCAATACAATTGGTCAAGGAAGTTATTATTTTTTTAATGACTTATATCTGTCCAACACAACAGGTTACACCATATAATCTCTATTTACTGGACAGGCGGAAATCGATAGTTTAGCTTTCCTAAAAATCGTTATATTATAGAAGCGTCTTGACACGTTTTCAAAAAAGGAAGAAGCAAGAACGAAAAGAGATAAGGATTCAAAAGAAAGGAAGCCCAATGTCTCGCAAATTTGATTTAAAAACGATTACTGATCTTTCCGTCCTAGTTGGGACTGGCATATCATTATACTACCTGGTCAGTCGGCTACTC…
721	1056	0	1	0	0	NC_001134	347518	349584	NC_001134	643613	645207	|gene |tRNA note= GO_component: cytosol [goid 0005829] [evidence NAS] |gene |CDS[fcd=-674](+,347877,349382) note= Ybr056wp;	|LTR note= YBRCTAU2 |LTR note= YBRWDELTA18 |LTR note= YBRCDELTA19 |gene |tRNA note= GO_component: cytosol [goid 0005829] [evidence NAS] |neigh_up CDS[fcd=-2205](-,636698,642205) gene= DUR1,2 note= Dur1,2p; |neigh_down CDS[fcd=1135](+,645545,645973) gene= ERV15 note= Erv15p;	CGGAGGAGCTACTAAAGAAAGAGTGCTGCAATTAATACAATTAATATAAGTGTGGTTATTGAAAATAACTATTCATTTATACGGAGGGTTGGCCGAGTGGTCTAAGGCGGCAGACTTAAGATCTGTTGGACGGTTGTCCGCGCGAGTTCGAACCTCGCATCCTTCAGTAATATTTTTTTAATATACATTTTCTCTGCCATCATGGCTTAAAAAATGCTTAAAAGAAGGGAATTAGGGGGGATGGATGAACTAAGACATAACTTTCTTTTCTTCAATTCGAACTCTGTTGGGAAGAGTTGCTTTAAAAAAGACTCTCTATCCATCTATAAAATTTATTAAAACTTTTGAACTGCACAGAATGATTGGCTCACTTAGAAACAAATTTGAGCATTTCAAAGT…	CGGTAGTTACTATACATTGATGTGACGACTCATATTCCTCATATATGTACCTACCATAACATGTTCAACTAATAGGTCTTTAACACAGCTTCAGTATTGTCTGAGCTTCTCGTTTAACATTCCTTCTGCAATAGGCGCAATCACACTTAAACGTATACGAGTTGTACATTAATATACGATGTAAGCATTGAATTGTTACCATAGCAACTCATGTCACTATTAATTACTCTCGTTCCAACATAATATTATTATGGAGTAATATCTATTCCCTTTCGTGGATTCCAAGATTCTCGAGGTATATTTCCAGTATATTTTGTATACCTGATATTATAGCCTTTAGCAACAACGAAATCAACATTTATCTCAAATTTCACCTGTTTCTCATTTTTAAGCGCCTAG…
721	9813	0	160	0	5390	NC_001134	347518	349584	NC_001145	168324	168875	|gene |tRNA note= GO_component: cytosol [goid 0005829] [evidence NAS] |gene |CDS[fcd=-674](+,347877,349382) note= Ybr056wp;	|LTR note= YMLCDELTA2 |gene gene= SUP5 gene= SUP5 note= GO_component: cytosol [goid 0005829] [evidence NAS] |neigh_up CDS[fcd=-818](-,167623,167781) note= Yml054c-ap; |neigh_down CDS[fcd=1155](-,169116,169754) note= Yml053cp;	CGGAGGAGCTACTAAAGAAAGAGTGCTGCAATTAATACAATTAATATAAGTGTGGTTATTGAAAATAACTATTCATTTATACGGAGGGTTGGCCGAGTGGTCTAAGGCGGCAGACTTAAGATCTGTTGGACGGTTGTCCGCGCGAGTTCGAACCTCGCATCCTTCAGTAATATTTTTTTAATATACATTTTCTCTGCCATCATGGCTTAAAAAATGCTTAAAAGAAGGGAATTAGGGGGGATGGATGAACTAAGACATAACTTTCTTTTCTTCAATTCGAACTCTGTTGGGAAGAGTTGCTTTAAAAAAGACTCTCTATCCATCTATAAAATTTATTAAAACTTTTGAACTGCACAGAATGATTGGCTCACTTAGAAACAAATTTGAGCATTTCAAAGT…	CGGATTTATTTCGTAAATTCTTATTGAAGAATGGGTGAATTTTGAGATAATCGTTGGGATTCCATTTTTAATAAGGCAATAATATTAGGTATGTAGAATGTACTAGAAGTTCTCCTCGAGGATTTAGGAATCCATAAAAGGGAATCTGCAATTCTACACAATTCTATAAATATTATTATCATCATTTTATATGTTAATATTCATTGATCCTATTACATTATCAATCCTTGCGTTTCAGCTTCCACTAATTTAGATGACTATTTCTCATCATTTGCGTCATCTTCTAACACCGTATATGATAATATACTAGTAACGTAAATACTAGTTAGTAGATGATAGTTGATTTTTATTCCAACACTTATATTCTATATATCCATAACATTGTCTACATATAATCCG…
721	7531	0	4	0	1	NC_001134	347518	349584	NC_001142	729966	730746	|gene |tRNA note= GO_component: cytosol [goid 0005829] [evidence NAS] |gene |CDS[fcd=-674](+,347877,349382) note= Ybr056wp;	|rep_origin note= ARS1023 |neigh_up CDS[fcd=-766](-,728568,729590) gene= THI11 note= Thi11p; |neigh_down CDS[fcd=2078](+,732434,734137) gene= HXT16 note= Hxt16p;	CGGAGGAGCTACTAAAGAAAGAGTGCTGCAATTAATACAATTAATATAAGTGTGGTTATTGAAAATAACTATTCATTTATACGGAGGGTTGGCCGAGTGGTCTAAGGCGGCAGACTTAAGATCTGTTGGACGGTTGTCCGCGCGAGTTCGAACCTCGCATCCTTCAGTAATATTTTTTTAATATACATTTTCTCTGCCATCATGGCTTAAAAAATGCTTAAAAGAAGGGAATTAGGGGGGATGGATGAACTAAGACATAACTTTCTTTTCTTCAATTCGAACTCTGTTGGGAAGAGTTGCTTTAAAAAAGACTCTCTATCCATCTATAAAATTTATTAAAACTTTTGAACTGCACAGAATGATTGGCTCACTTAGAAACAAATTTGAGCATTTCAAAGT…	CGGCAAAACGCTTAATCGCATATCCCAGTTGGCCCGAAAGAGAATGCACATATACAAATATATATGTAAAGGGAAATACCTTGTGACTACACCTATGCCTAAGTTTCAGTATCTGAACTAGGATAATTTCGATTATAACTCTAACATTTTTTACGTTTTCTCCATATTTCGAATTGTTCCTTCTTCAATCAAAATAATAAAAAAAAAAAATCACAAAAATGACTATAGTATTTTGAGCCCAACATGACTGCGAAATTGCTATTAACAATGATTAGTCAGTAGTATTGAATAACTTAGAATTTAAAACTACCTTATACAAGATGGGCATATAAAGGACATGCCAAATGGACATATTAAATACGCTCGATGTACCAGAACATCCAGGAACTTACCATAGAA…
721	700	0	3	0	0	NC_001134	347518	349584	NC_001134	333452	333553	|gene |tRNA note= GO_component: cytosol [goid 0005829] [evidence NAS] |gene |CDS[fcd=-674](+,347877,349382) note= Ybr056wp;	|gene gene= RPS11B gene= RPS11B note= Rps11bp; |neigh_up CDS[fcd=-1671](+,331831,332358) gene= FMP23 note= Fmp23p; |neigh_down CDS[fcd=3314](-,334384,336816) gene= REB1 note= Reb1p;	CGGAGGAGCTACTAAAGAAAGAGTGCTGCAATTAATACAATTAATATAAGTGTGGTTATTGAAAATAACTATTCATTTATACGGAGGGTTGGCCGAGTGGTCTAAGGCGGCAGACTTAAGATCTGTTGGACGGTTGTCCGCGCGAGTTCGAACCTCGCATCCTTCAGTAATATTTTTTTAATATACATTTTCTCTGCCATCATGGCTTAAAAAATGCTTAAAAGAAGGGAATTAGGGGGGATGGATGAACTAAGACATAACTTTCTTTTCTTCAATTCGAACTCTGTTGGGAAGAGTTGCTTTAAAAAAGACTCTCTATCCATCTATAAAATTTATTAAAACTTTTGAACTGCACAGAATGATTGGCTCACTTAGAAACAAATTTGAGCATTTCAAAGT…	CGGTTTGGGATTCAAGACCCCAAAGACCGCTATTGAAGGTTCTTACATTGATAAGAAATGTCCATTCACTGGTTTAGTTTCCATCCGTGGTAAGATCTTGA
721	8898	0	3	0	32	NC_001134	347518	349584	NC_001144	467775	468433	|gene |tRNA note= GO_component: cytosol [goid 0005829] [evidence NAS] |gene |CDS[fcd=-674](+,347877,349382) note= Ybr056wp;	|rRNA |rep_origin note= ARS1200-2 |neigh_up CDS[fcd=-5432](-,462523,462672) note= Ylr154c-gp; |neigh_down CDS[fcd=855](-,468828,468959) note= Ylr154c-hp;	CGGAGGAGCTACTAAAGAAAGAGTGCTGCAATTAATACAATTAATATAAGTGTGGTTATTGAAAATAACTATTCATTTATACGGAGGGTTGGCCGAGTGGTCTAAGGCGGCAGACTTAAGATCTGTTGGACGGTTGTCCGCGCGAGTTCGAACCTCGCATCCTTCAGTAATATTTTTTTAATATACATTTTCTCTGCCATCATGGCTTAAAAAATGCTTAAAAGAAGGGAATTAGGGGGGATGGATGAACTAAGACATAACTTTCTTTTCTTCAATTCGAACTCTGTTGGGAAGAGTTGCTTTAAAAAAGACTCTCTATCCATCTATAAAATTTATTAAAACTTTTGAACTGCACAGAATGATTGGCTCACTTAGAAACAAATTTGAGCATTTCAAAGT…	CGGGTAACCCAGTTCCTCACTATTTTTTACTGCGGAAGCGGAAGCGGAAAATACGGAAACGCGCGGGAACATACAAAACATACAAAATATACCTTTCTCACACAAGAAATATATGCTACTTGCAAAATATCATACCAAAAAACTTTTCACAACCGAAACCAAAACCAACGGATATCATACATTACACTACCACCATTCAAACTTTACTACTATCCTCCCTTCAGTTTCCCTTTTTCTGCCTTTTTCGGTGACGGAAATACGCTTCAGAGACCCTAAAGGGAAATCCATGCCATAACAGGAAAGTAACATCCCAATGCGGACTATACCACCCCACCACACTCCTACCAATAACGGTAACTATTCTATGTTTTCTTACTCCTATGTCTATTCATCTTTCAT…
721	8897	0	54	0	4	NC_001134	347518	349584	NC_001144	467213	467774	|gene |tRNA note= GO_component: cytosol [goid 0005829] [evidence NAS] |gene |CDS[fcd=-674](+,347877,349382) note= Ybr056wp;	|rRNA |rRNA |rRNA |neigh_up CDS[fcd=-4821](-,462523,462672) note= Ylr154c-gp; |neigh_down CDS[fcd=1466](-,468828,468959) note= Ylr154c-hp;	CGGAGGAGCTACTAAAGAAAGAGTGCTGCAATTAATACAATTAATATAAGTGTGGTTATTGAAAATAACTATTCATTTATACGGAGGGTTGGCCGAGTGGTCTAAGGCGGCAGACTTAAGATCTGTTGGACGGTTGTCCGCGCGAGTTCGAACCTCGCATCCTTCAGTAATATTTTTTTAATATACATTTTCTCTGCCATCATGGCTTAAAAAATGCTTAAAAGAAGGGAATTAGGGGGGATGGATGAACTAAGACATAACTTTCTTTTCTTCAATTCGAACTCTGTTGGGAAGAGTTGCTTTAAAAAAGACTCTCTATCCATCTATAAAATTTATTAAAACTTTTGAACTGCACAGAATGATTGGCTCACTTAGAAACAAATTTGAGCATTTCAAAGT…	CGGCTATTCAACAAGGCATTCCCCCAAGTTTGAATTCTTTGAAATAGATTGCTATTAGCTAGTAATCCACCAAATCCTTCGCTGCTCACCAATGGAATCGCAAGATGCCCACGATGAGACTGTTCAGGTTAAACGCAAAAGAAACACACTCTGGGAATTTCTTCCCAAATTGTATCTCTCAATACGCATCAACCCATGTCAATTAAACACGCTGTATAGAGACTAGGCAGATCTGACGATCACCTAGCGACTCTCTCCACCGTTTGACGAGGCCATTTACAAAAACATAACGAACGACAAGCCTACTCGAATTCGTTTCCAAACTCTTTTCGAACTTGTCTTCAACTGCTTTCGCATGAAGTACCTCCCAACTACTTTTCCTCACACTTGTACTCCATG…
721	8896	0	349	0	26	NC_001134	347518	349584	NC_001144	467136	467212	|gene |tRNA note= GO_component: cytosol [goid 0005829] [evidence NAS] |gene |CDS[fcd=-674](+,347877,349382) note= Ybr056wp;	|rRNA |rRNA |neigh_up CDS[fcd=-4502](-,462523,462672) note= Ylr154c-gp; |neigh_down CDS[fcd=1785](-,468828,468959) note= Ylr154c-hp;	CGGAGGAGCTACTAAAGAAAGAGTGCTGCAATTAATACAATTAATATAAGTGTGGTTATTGAAAATAACTATTCATTTATACGGAGGGTTGGCCGAGTGGTCTAAGGCGGCAGACTTAAGATCTGTTGGACGGTTGTCCGCGCGAGTTCGAACCTCGCATCCTTCAGTAATATTTTTTTAATATACATTTTCTCTGCCATCATGGCTTAAAAAATGCTTAAAAGAAGGGAATTAGGGGGGATGGATGAACTAAGACATAACTTTCTTTTCTTCAATTCGAACTCTGTTGGGAAGAGTTGCTTTAAAAAAGACTCTCTATCCATCTATAAAATTTATTAAAACTTTTGAACTGCACAGAATGATTGGCTCACTTAGAAACAAATTTGAGCATTTCAAAGT…	CGGTGTTTCACGGAATGGTACGTTTGATATCGCTGATTTGAGAGGAGGTTACACTTGAAGAATCACAGTCTTGCGA
721	1269	0	2	0	292	NC_001134	347518	349584	NC_001135	10448	10641	|gene |tRNA note= GO_component: cytosol [goid 0005829] [evidence NAS] |gene |CDS[fcd=-674](+,347877,349382) note= Ybr056wp;	|gene gene= VBA3 |CDS[fcd=-838](+,9706,11082) gene= VBA3 note= Vba3p;	CGGAGGAGCTACTAAAGAAAGAGTGCTGCAATTAATACAATTAATATAAGTGTGGTTATTGAAAATAACTATTCATTTATACGGAGGGTTGGCCGAGTGGTCTAAGGCGGCAGACTTAAGATCTGTTGGACGGTTGTCCGCGCGAGTTCGAACCTCGCATCCTTCAGTAATATTTTTTTAATATACATTTTCTCTGCCATCATGGCTTAAAAAATGCTTAAAAGAAGGGAATTAGGGGGGATGGATGAACTAAGACATAACTTTCTTTTCTTCAATTCGAACTCTGTTGGGAAGAGTTGCTTTAAAAAAGACTCTCTATCCATCTATAAAATTTATTAAAACTTTTGAACTGCACAGAATGATTGGCTCACTTAGAAACAAATTTGAGCATTTCAAAGT…	CGGTCTTCACTTGATACCAATCGTTATTACCAACGTTATTGCGGCCATTGCAAGTGGTGTGATTACCAAAAAGCTCGGTTTAGTTAAACCACTCTTAATATTTGGAGGCGTTCTTGGGGTAATTGGAGCAGGGCTTATGACACTTATGACAAATACGTCCACGAAGTCAACTCAAATTGGTGTTTTGCTATTA
721	3653	0	207	0	5	NC_001134	347518	349584	NC_001137	250158	250322	|gene |tRNA note= GO_component: cytosol [goid 0005829] [evidence NAS] |gene |CDS[fcd=-674](+,347877,349382) note= Ybr056wp;	|LTR note= YERCSIGMA1 |gene |tRNA note= GO_component: cytosol [goid 0005829] [evidence NAS] |neigh_up CDS[fcd=-2084](-,246981,248156) gene= CAJ1 note= Caj1p; |neigh_down CDS[fcd=477](+,250717,251001) gene= ISD11 note= Isd11p;	CGGAGGAGCTACTAAAGAAAGAGTGCTGCAATTAATACAATTAATATAAGTGTGGTTATTGAAAATAACTATTCATTTATACGGAGGGTTGGCCGAGTGGTCTAAGGCGGCAGACTTAAGATCTGTTGGACGGTTGTCCGCGCGAGTTCGAACCTCGCATCCTTCAGTAATATTTTTTTAATATACATTTTCTCTGCCATCATGGCTTAAAAAATGCTTAAAAGAAGGGAATTAGGGGGGATGGATGAACTAAGACATAACTTTCTTTTCTTCAATTCGAACTCTGTTGGGAAGAGTTGCTTTAAAAAAGACTCTCTATCCATCTATAAAATTTATTAAAACTTTTGAACTGCACAGAATGATTGGCTCACTTAGAAACAAATTTGAGCATTTCAAAGT…	CGGGTTTTATCTCATGTTGTTCGTTTTGTTATAAGGTTGTTTCATCTGTGTTTTATGAACGTTTAGGATGACGTATTGTCATACTGACGTATCTCATTTTGAGATACAACAATTTACAGTTGTACTGGTCCTATAGTGTAGTGGTTATCACTTTCGGTTTTGAT
721	8877	0	12	0	12	NC_001134	347518	349584	NC_001144	460610	460812	|gene |tRNA note= GO_component: cytosol [goid 0005829] [evidence NAS] |gene |CDS[fcd=-674](+,347877,349382) note= Ybr056wp;	|rRNA |rRNA |rRNA |neigh_up CDS[fcd=-6014](+,454697,455071) gene= TAR1 note= Tar1p; |neigh_down CDS[fcd=1961](-,462523,462672) note= Ylr154c-gp;	CGGAGGAGCTACTAAAGAAAGAGTGCTGCAATTAATACAATTAATATAAGTGTGGTTATTGAAAATAACTATTCATTTATACGGAGGGTTGGCCGAGTGGTCTAAGGCGGCAGACTTAAGATCTGTTGGACGGTTGTCCGCGCGAGTTCGAACCTCGCATCCTTCAGTAATATTTTTTTAATATACATTTTCTCTGCCATCATGGCTTAAAAAATGCTTAAAAGAAGGGAATTAGGGGGGATGGATGAACTAAGACATAACTTTCTTTTCTTCAATTCGAACTCTGTTGGGAAGAGTTGCTTTAAAAAAGACTCTCTATCCATCTATAAAATTTATTAAAACTTTTGAACTGCACAGAATGATTGGCTCACTTAGAAACAAATTTGAGCATTTCAAAGT…	CGGGCAAATCCTTTCACGCTCGGGAAGCTTTGTGAAAGCCCTTCTCTTTCAACCCATCTTTGCAACGAAAAAAAAAAAAAAAATAAAAAATAAAAAGACCAAATAGTAAATAGTAACTTACATACATTAGTAAATGGTACACTCTTACACACTATCATCCTCATCGTATATTATAATAGATATATACAATACATGTTTTTAC
721	8879	0	2	0	0	NC_001134	347518	349584	NC_001144	460886	461734	|gene |tRNA note= GO_component: cytosol [goid 0005829] [evidence NAS] |gene |CDS[fcd=-674](+,347877,349382) note= Ybr056wp;	|rRNA |rRNA |rRNA note= GO_component: cytosolic large ribosomal subunit |neigh_up CDS[fcd=-6613](+,454697,455071) gene= TAR1 note= Tar1p; |neigh_down CDS[fcd=1362](-,462523,462672) note= Ylr154c-gp;	CGGAGGAGCTACTAAAGAAAGAGTGCTGCAATTAATACAATTAATATAAGTGTGGTTATTGAAAATAACTATTCATTTATACGGAGGGTTGGCCGAGTGGTCTAAGGCGGCAGACTTAAGATCTGTTGGACGGTTGTCCGCGCGAGTTCGAACCTCGCATCCTTCAGTAATATTTTTTTAATATACATTTTCTCTGCCATCATGGCTTAAAAAATGCTTAAAAGAAGGGAATTAGGGGGGATGGATGAACTAAGACATAACTTTCTTTTCTTCAATTCGAACTCTGTTGGGAAGAGTTGCTTTAAAAAAGACTCTCTATCCATCTATAAAATTTATTAAAACTTTTGAACTGCACAGAATGATTGGCTCACTTAGAAACAAATTTGAGCATTTCAAAGT…	CGGCTCCTGCCAGTACCCACTTAGAAAGAAATAAAAAACAAATCAGACAACAAAGGCTTAATCTCAGCAGATCGTAACAACAAGGCTACTCTACTGCTTACAATACCCCGTTGTACATCTAAGTCGTATACAAATGATTTATCCCCACGCAAAATGACATTGCAATTCGCCAGCAAGCACCCAAGGCCTTTCCGCCAAGTGCACCGTTGCTAGCCTGCTATGGTTCAGCGACGCCACAAGGACGCCTTATTCGTATCCATCTATATTGTGTGGAGCAAAGAAATCACCGCGTTCTAGCATGGATTCTGACTTAGAGGCGTTCAGCCATAATCCAGCGGATGGTAGCTTCGCGGCAATGCCTGATCAGACAGCCGCAAAAACCAATTATCCGAATGAACT…
721	8878	0	1	0	0	NC_001134	347518	349584	NC_001144	460813	460885	|gene |tRNA note= GO_component: cytosol [goid 0005829] [evidence NAS] |gene |CDS[fcd=-674](+,347877,349382) note= Ybr056wp;	|rRNA |rRNA |neigh_up CDS[fcd=-6152](+,454697,455071) gene= TAR1 note= Tar1p; |neigh_down CDS[fcd=1823](-,462523,462672) note= Ylr154c-gp;	CGGAGGAGCTACTAAAGAAAGAGTGCTGCAATTAATACAATTAATATAAGTGTGGTTATTGAAAATAACTATTCATTTATACGGAGGGTTGGCCGAGTGGTCTAAGGCGGCAGACTTAAGATCTGTTGGACGGTTGTCCGCGCGAGTTCGAACCTCGCATCCTTCAGTAATATTTTTTTAATATACATTTTCTCTGCCATCATGGCTTAAAAAATGCTTAAAAGAAGGGAATTAGGGGGGATGGATGAACTAAGACATAACTTTCTTTTCTTCAATTCGAACTCTGTTGGGAAGAGTTGCTTTAAAAAAGACTCTCTATCCATCTATAAAATTTATTAAAACTTTTGAACTGCACAGAATGATTGGCTCACTTAGAAACAAATTTGAGCATTTCAAAGT…	CGGATCATAGAATTCTTAAGACAAATAAAATTTATAGAGACTTGTTCAGTCTACTTCTCTCTAAACTAGGCC
721	8873	0	55	0	9	NC_001134	347518	349584	NC_001144	458076	458637	|gene |tRNA note= GO_component: cytosol [goid 0005829] [evidence NAS] |gene |CDS[fcd=-674](+,347877,349382) note= Ybr056wp;	|rRNA |rRNA |rRNA |neigh_up CDS[fcd=-3659](+,454697,455071) gene= TAR1 note= Tar1p; |neigh_down CDS[fcd=4316](-,462523,462672) note= Ylr154c-gp;	CGGAGGAGCTACTAAAGAAAGAGTGCTGCAATTAATACAATTAATATAAGTGTGGTTATTGAAAATAACTATTCATTTATACGGAGGGTTGGCCGAGTGGTCTAAGGCGGCAGACTTAAGATCTGTTGGACGGTTGTCCGCGCGAGTTCGAACCTCGCATCCTTCAGTAATATTTTTTTAATATACATTTTCTCTGCCATCATGGCTTAAAAAATGCTTAAAAGAAGGGAATTAGGGGGGATGGATGAACTAAGACATAACTTTCTTTTCTTCAATTCGAACTCTGTTGGGAAGAGTTGCTTTAAAAAAGACTCTCTATCCATCTATAAAATTTATTAAAACTTTTGAACTGCACAGAATGATTGGCTCACTTAGAAACAAATTTGAGCATTTCAAAGT…	CGGCTATTCAACAAGGCATTCCCCCAAGTTTGAATTCTTTGAAATAGATTGCTATTAGCTAGTAATCCACCAAATCCTTCGCTGCTCACCAATGGAATCGCAAGATGCCCACGATGAGACTGTTCAGGTTAAACGCAAAAGAAACACACTCTGGGAATTTCTTCCCAAATTGTATCTCTCAATACGCATCAACCCATGTCAATTAAACACGCTGTATAGAGACTAGGCAGATCTGACGATCACCTAGCGACTCTCTCCACCGTTTGACGAGGCCATTTACAAAAACATAACGAACGACAAGCCTACTCGAATTCGTTTCCAAACTCTTTTCGAACTTGTCTTCAACTGCTTTCGCATGAAGTACCTCCCAACTACTTTTCCTCACACTTGTACTCCATG…
721	8872	0	389	0	20	NC_001134	347518	349584	NC_001144	457999	458075	|gene |tRNA note= GO_component: cytosol [goid 0005829] [evidence NAS] |gene |CDS[fcd=-674](+,347877,349382) note= Ybr056wp;	|rRNA |rRNA |neigh_up CDS[fcd=-3340](+,454697,455071) gene= TAR1 note= Tar1p; |neigh_down CDS[fcd=4635](-,462523,462672) note= Ylr154c-gp;	CGGAGGAGCTACTAAAGAAAGAGTGCTGCAATTAATACAATTAATATAAGTGTGGTTATTGAAAATAACTATTCATTTATACGGAGGGTTGGCCGAGTGGTCTAAGGCGGCAGACTTAAGATCTGTTGGACGGTTGTCCGCGCGAGTTCGAACCTCGCATCCTTCAGTAATATTTTTTTAATATACATTTTCTCTGCCATCATGGCTTAAAAAATGCTTAAAAGAAGGGAATTAGGGGGGATGGATGAACTAAGACATAACTTTCTTTTCTTCAATTCGAACTCTGTTGGGAAGAGTTGCTTTAAAAAAGACTCTCTATCCATCTATAAAATTTATTAAAACTTTTGAACTGCACAGAATGATTGGCTCACTTAGAAACAAATTTGAGCATTTCAAAGT…	CGGTGTTTCACGGAATGGTACGTTTGATATCGCTGATTTGAGAGGAGGTTACACTTGAAGAATCACAGTCTTGCGA
721	8874	0	1	0	29	NC_001134	347518	349584	NC_001144	458638	459296	|gene |tRNA note= GO_component: cytosol [goid 0005829] [evidence NAS] |gene |CDS[fcd=-674](+,347877,349382) note= Ybr056wp;	|rRNA |rep_origin note= ARS1200-1 |neigh_up CDS[fcd=-4270](+,454697,455071) gene= TAR1 note= Tar1p; |neigh_down CDS[fcd=3705](-,462523,462672) note= Ylr154c-gp;	CGGAGGAGCTACTAAAGAAAGAGTGCTGCAATTAATACAATTAATATAAGTGTGGTTATTGAAAATAACTATTCATTTATACGGAGGGTTGGCCGAGTGGTCTAAGGCGGCAGACTTAAGATCTGTTGGACGGTTGTCCGCGCGAGTTCGAACCTCGCATCCTTCAGTAATATTTTTTTAATATACATTTTCTCTGCCATCATGGCTTAAAAAATGCTTAAAAGAAGGGAATTAGGGGGGATGGATGAACTAAGACATAACTTTCTTTTCTTCAATTCGAACTCTGTTGGGAAGAGTTGCTTTAAAAAAGACTCTCTATCCATCTATAAAATTTATTAAAACTTTTGAACTGCACAGAATGATTGGCTCACTTAGAAACAAATTTGAGCATTTCAAAGT…	CGGGTAACCCAGTTCCTCACTATTTTTTACTGCGGAAGCGGAAGCGGAAAATACGGAAACGCGCGGGAACATACAAAACATACAAAATATACCTTTCTCACACAAGAAATATATGCTACTTGCAAAATATCATACCAAAAAACTTTTCACAACCGAAACCAAAACCAACGGATATCATACATTACACTACCACCATTCAAACTTTACTACTATCCTCCCTTCAGTTTCCCTTTTTCTGCCTTTTTCGGTGACGGAAATACGCTTCAGAGACCCTAAAGGGAAATCCATGCCATAACAGGAAAGTAACATCCCAATGCGGACTATACCACCCCACCACACTCCTACCAATAACGGTAACTATTCTATGTTTTCTTACTCCTATGTCTATTCATCTTTCAT…
721	8869	0	1309	0	64	NC_001134	347518	349584	NC_001144	457086	457349	|gene |tRNA note= GO_component: cytosol [goid 0005829] [evidence NAS] |gene |CDS[fcd=-674](+,347877,349382) note= Ybr056wp;	|rRNA |rRNA note= GO_component: cytosolic small ribosomal subunit |neigh_up CDS[fcd=-2520](+,454697,455071) gene= TAR1 note= Tar1p; |neigh_down CDS[fcd=5455](-,462523,462672) note= Ylr154c-gp;	CGGAGGAGCTACTAAAGAAAGAGTGCTGCAATTAATACAATTAATATAAGTGTGGTTATTGAAAATAACTATTCATTTATACGGAGGGTTGGCCGAGTGGTCTAAGGCGGCAGACTTAAGATCTGTTGGACGGTTGTCCGCGCGAGTTCGAACCTCGCATCCTTCAGTAATATTTTTTTAATATACATTTTCTCTGCCATCATGGCTTAAAAAATGCTTAAAAGAAGGGAATTAGGGGGGATGGATGAACTAAGACATAACTTTCTTTTCTTCAATTCGAACTCTGTTGGGAAGAGTTGCTTTAAAAAAGACTCTCTATCCATCTATAAAATTTATTAAAACTTTTGAACTGCACAGAATGATTGGCTCACTTAGAAACAAATTTGAGCATTTCAAAGT…	CGGGCCCAAAGTTCAACTACGAGCTTTTTAACTGCAACAACTTTAATATACGCTATTGGAGCTGGAATTACCGCGGCTGCTGGCACCAGACTTGCCCTCCAATTGTTCCTCGTTAAGGTATTTACATTGTACTCATTCCAATTACAAGACCCGAATGGGCCCTGTATCGTTATTTATTGTCACTACCTCCCTGAATTAGGATTGGGTAATTTGCGCGCCTGCTGCCTTCCTTGGATGTGGTAGCCGTTTCTCAGGCTCCCTCT
721	8871	0	8	0	10	NC_001134	347518	349584	NC_001144	457888	457998	|gene |tRNA note= GO_component: cytosol [goid 0005829] [evidence NAS] |gene |CDS[fcd=-674](+,347877,349382) note= Ybr056wp;	|rRNA |rRNA |neigh_up CDS[fcd=-3246](+,454697,455071) gene= TAR1 note= Tar1p; |neigh_down CDS[fcd=4729](-,462523,462672) note= Ylr154c-gp;	CGGAGGAGCTACTAAAGAAAGAGTGCTGCAATTAATACAATTAATATAAGTGTGGTTATTGAAAATAACTATTCATTTATACGGAGGGTTGGCCGAGTGGTCTAAGGCGGCAGACTTAAGATCTGTTGGACGGTTGTCCGCGCGAGTTCGAACCTCGCATCCTTCAGTAATATTTTTTTAATATACATTTTCTCTGCCATCATGGCTTAAAAAATGCTTAAAAGAAGGGAATTAGGGGGGATGGATGAACTAAGACATAACTTTCTTTTCTTCAATTCGAACTCTGTTGGGAAGAGTTGCTTTAAAAAAGACTCTCTATCCATCTATAAAATTTATTAAAACTTTTGAACTGCACAGAATGATTGGCTCACTTAGAAACAAATTTGAGCATTTCAAAGT…	CGGAAATGCTCTCTGTTCAAAAAGCTTTTACACTCTTGACCAGCGCACTCCGTCACCATACCATAGCACTCTTTGAGTTTCCTCTAATCAGGTTCCACCAAACAGATACC
721	8870	0	278	0	0	NC_001134	347518	349584	NC_001144	457350	457887	|gene |tRNA note= GO_component: cytosol [goid 0005829] [evidence NAS] |gene |CDS[fcd=-674](+,347877,349382) note= Ybr056wp;	|rRNA |rRNA note= GO_component: cytosolic small ribosomal subunit |rRNA |neigh_up CDS[fcd=-2921](+,454697,455071) gene= TAR1 note= Tar1p; |neigh_down CDS[fcd=5054](-,462523,462672) note= Ylr154c-gp;	CGGAGGAGCTACTAAAGAAAGAGTGCTGCAATTAATACAATTAATATAAGTGTGGTTATTGAAAATAACTATTCATTTATACGGAGGGTTGGCCGAGTGGTCTAAGGCGGCAGACTTAAGATCTGTTGGACGGTTGTCCGCGCGAGTTCGAACCTCGCATCCTTCAGTAATATTTTTTTAATATACATTTTCTCTGCCATCATGGCTTAAAAAATGCTTAAAAGAAGGGAATTAGGGGGGATGGATGAACTAAGACATAACTTTCTTTTCTTCAATTCGAACTCTGTTGGGAAGAGTTGCTTTAAAAAAGACTCTCTATCCATCTATAAAATTTATTAAAACTTTTGAACTGCACAGAATGATTGGCTCACTTAGAAACAAATTTGAGCATTTCAAAGT…	CGGAATCGAACCCTTATTCCCCGTTACCCGTTGAAACCATGGTAGGCCACTATCCTACCATCGAAAGTTGATAGGGCAGAAATTTGAATGAACCATCGCCAGCACAAGGCCATGCGATTCGAAAAGTTATTATGAATCATCAAAGAGTCCGAAGACATTGATTTTTTATCTAATAAATACATCTCTTCCAAAGGGTCGAGATTTTAAGCATGTATTAGCTCTAGAATTACCACAGTTATACCATGTAGTAAAGGAACTATCAAATAAACGATAACTGATTTAATGAGCCATTCGCAGTTTCACTGTATAAATTGCTTATACTTAGACATGCATGGCTTAATCTTTGAGACAAGCATATGACTACTGGCAGGATCAACCAGATAACTATCTTAAAAGAAG…
721	8864	0	877	0	50	NC_001134	347518	349584	NC_001144	454005	454163	|gene |tRNA note= GO_component: cytosol [goid 0005829] [evidence NAS] |gene |CDS[fcd=-674](+,347877,349382) note= Ybr056wp;	|rRNA |rRNA note= GO_component: cytosolic large ribosomal subunit |neigh_up CDS[fcd=-5769](-,447983,448315) gene= RNH203 note= Rnh203p; |neigh_down CDS[fcd=613](+,454697,455071) gene= TAR1 note= Tar1p;	CGGAGGAGCTACTAAAGAAAGAGTGCTGCAATTAATACAATTAATATAAGTGTGGTTATTGAAAATAACTATTCATTTATACGGAGGGTTGGCCGAGTGGTCTAAGGCGGCAGACTTAAGATCTGTTGGACGGTTGTCCGCGCGAGTTCGAACCTCGCATCCTTCAGTAATATTTTTTTAATATACATTTTCTCTGCCATCATGGCTTAAAAAATGCTTAAAAGAAGGGAATTAGGGGGGATGGATGAACTAAGACATAACTTTCTTTTCTTCAATTCGAACTCTGTTGGGAAGAGTTGCTTTAAAAAAGACTCTCTATCCATCTATAAAATTTATTAAAACTTTTGAACTGCACAGAATGATTGGCTCACTTAGAAACAAATTTGAGCATTTCAAAGT…	CGGCACCTTAACTCTACGTTCGGTTCATCCCGCATCGCCAGTTCTGCTTACCAAAAATGGCCCACTAAAAGCTCTTCATTCAAATGTCCACGTTCAATTAAGTAACAAGGACTTCTTACATATTTAAAGTTTGAGAATAGGTCAAGGTCATTTCGACC
721	8867	0	2	0	1474	NC_001134	347518	349584	NC_001144	455837	457077	|gene |tRNA note= GO_component: cytosol [goid 0005829] [evidence NAS] |gene |CDS[fcd=-674](+,347877,349382) note= Ybr056wp;	|rRNA |rRNA |rRNA note= GO_component: cytosolic small ribosomal subunit |neigh_up CDS[fcd=-1760](+,454697,455071) gene= TAR1 note= Tar1p; |neigh_down CDS[fcd=6215](-,462523,462672) note= Ylr154c-gp;	CGGAGGAGCTACTAAAGAAAGAGTGCTGCAATTAATACAATTAATATAAGTGTGGTTATTGAAAATAACTATTCATTTATACGGAGGGTTGGCCGAGTGGTCTAAGGCGGCAGACTTAAGATCTGTTGGACGGTTGTCCGCGCGAGTTCGAACCTCGCATCCTTCAGTAATATTTTTTTAATATACATTTTCTCTGCCATCATGGCTTAAAAAATGCTTAAAAGAAGGGAATTAGGGGGGATGGATGAACTAAGACATAACTTTCTTTTCTTCAATTCGAACTCTGTTGGGAAGAGTTGCTTTAAAAAAGACTCTCTATCCATCTATAAAATTTATTAAAACTTTTGAACTGCACAGAATGATTGGCTCACTTAGAAACAAATTTGAGCATTTCAAAGT…	CGGCTGGACTCTCCATCTCTTGTCTTCTTGCCCAGTAAAAGCTCTCATGCTCTTGCCAAAACAAAAAAATCCATTTTCAAAATTATTAAATTTCTTTAATGATCCTTCCGCAGGTTCACCTACGGAAACCTTGTTACGACTTTTAGTTCCTCTAAATGACCAAGTTTGTCCAAATTCTCCGCTCTGAGATGGAGTTGCCCCCTTCTCTAAGCAGATCCTGAGGCCTCACTAAGCCATTCAATCGGTACTAGCGACGGGCGGTGTGTACAAAGGGCAGGGACGTAATCAACGCAAGCTGATGACTTGCGCTTACTAGGAATTCCTCGTTGAAGAGCAATAATTACAATGCTCTATCCCCAGCACGACGGAGTTTCACAAGATTACCAAGACCTCTCGGCC…
721	8893	0	1294	0	53	NC_001134	347518	349584	NC_001144	466223	466486	|gene |tRNA note= GO_component: cytosol [goid 0005829] [evidence NAS] |gene |CDS[fcd=-674](+,347877,349382) note= Ybr056wp;	|rRNA |rRNA note= GO_component: cytosolic small ribosomal subunit |neigh_up CDS[fcd=-3682](-,462523,462672) note= Ylr154c-gp; |neigh_down CDS[fcd=2605](-,468828,468959) note= Ylr154c-hp;	CGGAGGAGCTACTAAAGAAAGAGTGCTGCAATTAATACAATTAATATAAGTGTGGTTATTGAAAATAACTATTCATTTATACGGAGGGTTGGCCGAGTGGTCTAAGGCGGCAGACTTAAGATCTGTTGGACGGTTGTCCGCGCGAGTTCGAACCTCGCATCCTTCAGTAATATTTTTTTAATATACATTTTCTCTGCCATCATGGCTTAAAAAATGCTTAAAAGAAGGGAATTAGGGGGGATGGATGAACTAAGACATAACTTTCTTTTCTTCAATTCGAACTCTGTTGGGAAGAGTTGCTTTAAAAAAGACTCTCTATCCATCTATAAAATTTATTAAAACTTTTGAACTGCACAGAATGATTGGCTCACTTAGAAACAAATTTGAGCATTTCAAAGT…	CGGGCCCAAAGTTCAACTACGAGCTTTTTAACTGCAACAACTTTAATATACGCTATTGGAGCTGGAATTACCGCGGCTGCTGGCACCAGACTTGCCCTCCAATTGTTCCTCGTTAAGGTATTTACATTGTACTCATTCCAATTACAAGACCCGAATGGGCCCTGTATCGTTATTTATTGTCACTACCTCCCTGAATTAGGATTGGGTAATTTGCGCGCCTGCTGCCTTCCTTGGATGTGGTAGCCGTTTCTCAGGCTCCCTCT
721	8894	0	274	0	1	NC_001134	347518	349584	NC_001144	466487	467024	|gene |tRNA note= GO_component: cytosol [goid 0005829] [evidence NAS] |gene |CDS[fcd=-674](+,347877,349382) note= Ybr056wp;	|rRNA |rRNA note= GO_component: cytosolic small ribosomal subunit |rRNA |neigh_up CDS[fcd=-4083](-,462523,462672) note= Ylr154c-gp; |neigh_down CDS[fcd=2204](-,468828,468959) note= Ylr154c-hp;	CGGAGGAGCTACTAAAGAAAGAGTGCTGCAATTAATACAATTAATATAAGTGTGGTTATTGAAAATAACTATTCATTTATACGGAGGGTTGGCCGAGTGGTCTAAGGCGGCAGACTTAAGATCTGTTGGACGGTTGTCCGCGCGAGTTCGAACCTCGCATCCTTCAGTAATATTTTTTTAATATACATTTTCTCTGCCATCATGGCTTAAAAAATGCTTAAAAGAAGGGAATTAGGGGGGATGGATGAACTAAGACATAACTTTCTTTTCTTCAATTCGAACTCTGTTGGGAAGAGTTGCTTTAAAAAAGACTCTCTATCCATCTATAAAATTTATTAAAACTTTTGAACTGCACAGAATGATTGGCTCACTTAGAAACAAATTTGAGCATTTCAAAGT…	CGGAATCGAACCCTTATTCCCCGTTACCCGTTGAAACCATGGTAGGCCACTATCCTACCATCGAAAGTTGATAGGGCAGAAATTTGAATGAACCATCGCCAGCACAAGGCCATGCGATTCGAAAAGTTATTATGAATCATCAAAGAGTCCGAAGACATTGATTTTTTATCTAATAAATACATCTCTTCCAAAGGGTCGAGATTTTAAGCATGTATTAGCTCTAGAATTACCACAGTTATACCATGTAGTAAAGGAACTATCAAATAAACGATAACTGATTTAATGAGCCATTCGCAGTTTCACTGTATAAATTGCTTATACTTAGACATGCATGGCTTAATCTTTGAGACAAGCATATGACTACTGGCAGGATCAACCAGATAACTATCTTAAAAGAAG…
721	8895	0	6	0	6	NC_001134	347518	349584	NC_001144	467025	467135	|gene |tRNA note= GO_component: cytosol [goid 0005829] [evidence NAS] |gene |CDS[fcd=-674](+,347877,349382) note= Ybr056wp;	|rRNA |rRNA |neigh_up CDS[fcd=-4408](-,462523,462672) note= Ylr154c-gp; |neigh_down CDS[fcd=1879](-,468828,468959) note= Ylr154c-hp;	CGGAGGAGCTACTAAAGAAAGAGTGCTGCAATTAATACAATTAATATAAGTGTGGTTATTGAAAATAACTATTCATTTATACGGAGGGTTGGCCGAGTGGTCTAAGGCGGCAGACTTAAGATCTGTTGGACGGTTGTCCGCGCGAGTTCGAACCTCGCATCCTTCAGTAATATTTTTTTAATATACATTTTCTCTGCCATCATGGCTTAAAAAATGCTTAAAAGAAGGGAATTAGGGGGGATGGATGAACTAAGACATAACTTTCTTTTCTTCAATTCGAACTCTGTTGGGAAGAGTTGCTTTAAAAAAGACTCTCTATCCATCTATAAAATTTATTAAAACTTTTGAACTGCACAGAATGATTGGCTCACTTAGAAACAAATTTGAGCATTTCAAAGT…	CGGAAATGCTCTCTGTTCAAAAAGCTTTTACACTCTTGACCAGCGCACTCCGTCACCATACCATAGCACTCTTTGAGTTTCCTCTAATCAGGTTCCACCAAACAGATACC
721	8888	0	853	0	56	NC_001134	347518	349584	NC_001144	463142	463300	|gene |tRNA note= GO_component: cytosol [goid 0005829] [evidence NAS] |gene |CDS[fcd=-674](+,347877,349382) note= Ybr056wp;	|rRNA |rRNA note= GO_component: cytosolic large ribosomal subunit |neigh_up CDS[fcd=-549](-,462523,462672) note= Ylr154c-gp; |neigh_down CDS[fcd=5738](-,468828,468959) note= Ylr154c-hp;	CGGAGGAGCTACTAAAGAAAGAGTGCTGCAATTAATACAATTAATATAAGTGTGGTTATTGAAAATAACTATTCATTTATACGGAGGGTTGGCCGAGTGGTCTAAGGCGGCAGACTTAAGATCTGTTGGACGGTTGTCCGCGCGAGTTCGAACCTCGCATCCTTCAGTAATATTTTTTTAATATACATTTTCTCTGCCATCATGGCTTAAAAAATGCTTAAAAGAAGGGAATTAGGGGGGATGGATGAACTAAGACATAACTTTCTTTTCTTCAATTCGAACTCTGTTGGGAAGAGTTGCTTTAAAAAAGACTCTCTATCCATCTATAAAATTTATTAAAACTTTTGAACTGCACAGAATGATTGGCTCACTTAGAAACAAATTTGAGCATTTCAAAGT…	CGGCACCTTAACTCTACGTTCGGTTCATCCCGCATCGCCAGTTCTGCTTACCAAAAATGGCCCACTAAAAGCTCTTCATTCAAATGTCCACGTTCAATTAAGTAACAAGGACTTCTTACATATTTAAAGTTTGAGAATAGGTCAAGGTCATTTCGACC
721	8889	0	1	0	0	NC_001134	347518	349584	NC_001144	463301	464244	|gene |tRNA note= GO_component: cytosol [goid 0005829] [evidence NAS] |gene |CDS[fcd=-674](+,347877,349382) note= Ybr056wp;	|rRNA |rRNA note= GO_component: cytosolic large ribosomal subunit |neigh_up CDS[fcd=-1100](-,462523,462672) note= Ylr154c-gp; |neigh_down CDS[fcd=5187](-,468828,468959) note= Ylr154c-hp;	CGGAGGAGCTACTAAAGAAAGAGTGCTGCAATTAATACAATTAATATAAGTGTGGTTATTGAAAATAACTATTCATTTATACGGAGGGTTGGCCGAGTGGTCTAAGGCGGCAGACTTAAGATCTGTTGGACGGTTGTCCGCGCGAGTTCGAACCTCGCATCCTTCAGTAATATTTTTTTAATATACATTTTCTCTGCCATCATGGCTTAAAAAATGCTTAAAAGAAGGGAATTAGGGGGGATGGATGAACTAAGACATAACTTTCTTTTCTTCAATTCGAACTCTGTTGGGAAGAGTTGCTTTAAAAAAGACTCTCTATCCATCTATAAAATTTATTAAAACTTTTGAACTGCACAGAATGATTGGCTCACTTAGAAACAAATTTGAGCATTTCAAAGT…	CGGAACCTCTAATCATTCGCTTTACCTCATAAAACTGATACGAGCTTCTGCTATCCTGAGGGAAACTTCGGCAGGAACCAGCTACTAGATGGTTCGATTAGTCTTTCGCCCCTATACCCAAATTCGACGATCGATTTGCACGTCAGAACCGCTACGAGCCTCCACCAGAGTTTCCTCTGGCTTCACCCTATTCAGGCATAGTTCACCATCTTTCGGGTCCCAACAGCTATGCTCTTACTCAAATCCATCCGAAGACATCAGGATCGGTCGATTGTGCACCTCTTGCGAGGCCCCAACCTACGTTCACTTTCATTACGCGTATGGGTTTTACACCCAAACACTCGCATAGACGTTAGACTCCTTGGTCCGTGTTTCAAGACGGGCGGCATATAACCATTA…
721	8885	0	88	0	7	NC_001134	347518	349584	NC_001144	462721	463037	|gene |tRNA note= GO_component: cytosol [goid 0005829] [evidence NAS] |gene |CDS[fcd=-674](+,347877,349382) note= Ybr056wp;	|rRNA |rRNA note= GO_component: cytosolic large ribosomal subunit |neigh_up CDS[fcd=-207](-,462523,462672) note= Ylr154c-gp; |neigh_down CDS[fcd=6080](-,468828,468959) note= Ylr154c-hp;	CGGAGGAGCTACTAAAGAAAGAGTGCTGCAATTAATACAATTAATATAAGTGTGGTTATTGAAAATAACTATTCATTTATACGGAGGGTTGGCCGAGTGGTCTAAGGCGGCAGACTTAAGATCTGTTGGACGGTTGTCCGCGCGAGTTCGAACCTCGCATCCTTCAGTAATATTTTTTTAATATACATTTTCTCTGCCATCATGGCTTAAAAAATGCTTAAAAGAAGGGAATTAGGGGGGATGGATGAACTAAGACATAACTTTCTTTTCTTCAATTCGAACTCTGTTGGGAAGAGTTGCTTTAAAAAAGACTCTCTATCCATCTATAAAATTTATTAAAACTTTTGAACTGCACAGAATGATTGGCTCACTTAGAAACAAATTTGAGCATTTCAAAGT…	CGGATTCCCTTTCGATGGTGGCCTGCATAAAATCAGGCCTTTGAAACGGAGCTTCCCCATCTCTTAGGATCGACTAACCCACGTCCAACTGCTGTTGACGTGGAACCTTTCCCCACTTCAGTCTTCAAAGTTCTCATTTGAATATTTGCTACTACCACCAAGATCTGCACTAGAGGCCGTTCGACCCGACCTTACGGTCTAGGCTTCGTCACTGACCTCCACGCCTGCCTACTCGTCAGGGCATCATATCAACCCTGACGGTAGAGTATAGGTAACACGCTTGAGCGCCATCCATTTTCAGGGCTAGTTCATTCGG
721	8886	0	188	0	225	NC_001134	347518	349584	NC_001144	463038	463089	|gene |tRNA note= GO_component: cytosol [goid 0005829] [evidence NAS] |gene |CDS[fcd=-674](+,347877,349382) note= Ybr056wp;	|rRNA |rRNA note= GO_component: cytosolic large ribosomal subunit |neigh_up CDS[fcd=-391](-,462523,462672) note= Ylr154c-gp; |neigh_down CDS[fcd=5896](-,468828,468959) note= Ylr154c-hp;	CGGAGGAGCTACTAAAGAAAGAGTGCTGCAATTAATACAATTAATATAAGTGTGGTTATTGAAAATAACTATTCATTTATACGGAGGGTTGGCCGAGTGGTCTAAGGCGGCAGACTTAAGATCTGTTGGACGGTTGTCCGCGCGAGTTCGAACCTCGCATCCTTCAGTAATATTTTTTTAATATACATTTTCTCTGCCATCATGGCTTAAAAAATGCTTAAAAGAAGGGAATTAGGGGGGATGGATGAACTAAGACATAACTTTCTTTTCTTCAATTCGAACTCTGTTGGGAAGAGTTGCTTTAAAAAAGACTCTCTATCCATCTATAAAATTTATTAAAACTTTTGAACTGCACAGAATGATTGGCTCACTTAGAAACAAATTTGAGCATTTCAAAGT…	CGGTGAGTTGTTACACACTCCTTAGCGGATTCCGACTTCCATGGCCACCGT
721	8887	0	423	0	2	NC_001134	347518	349584	NC_001144	463090	463141	|gene |tRNA note= GO_component: cytosol [goid 0005829] [evidence NAS] |gene |CDS[fcd=-674](+,347877,349382) note= Ybr056wp;	|rRNA |rRNA note= GO_component: cytosolic large ribosomal subunit |neigh_up CDS[fcd=-443](-,462523,462672) note= Ylr154c-gp; |neigh_down CDS[fcd=5844](-,468828,468959) note= Ylr154c-hp;	CGGAGGAGCTACTAAAGAAAGAGTGCTGCAATTAATACAATTAATATAAGTGTGGTTATTGAAAATAACTATTCATTTATACGGAGGGTTGGCCGAGTGGTCTAAGGCGGCAGACTTAAGATCTGTTGGACGGTTGTCCGCGCGAGTTCGAACCTCGCATCCTTCAGTAATATTTTTTTAATATACATTTTCTCTGCCATCATGGCTTAAAAAATGCTTAAAAGAAGGGAATTAGGGGGGATGGATGAACTAAGACATAACTTTCTTTTCTTCAATTCGAACTCTGTTGGGAAGAGTTGCTTTAAAAAAGACTCTCTATCCATCTATAAAATTTATTAAAACTTTTGAACTGCACAGAATGATTGGCTCACTTAGAAACAAATTTGAGCATTTCAAAGT…	CGGCTGTCTAGATGAACTAACACCTTTTGTGGTGTCTGATGAGCGTGTATT
721	13184	0	4	0	0	NC_001134	347518	349584	NC_001148	331066	332925	|gene |tRNA note= GO_component: cytosol [goid 0005829] [evidence NAS] |gene |CDS[fcd=-674](+,347877,349382) note= Ybr056wp;	|gene gene= HOS3 |CDS(+,329605,331698) gene= HOS3 note= Hos3p; |gene gene= BEM3 |CDS(-,332099,335485) gene= BEM3 note= Bem3p;	CGGAGGAGCTACTAAAGAAAGAGTGCTGCAATTAATACAATTAATATAAGTGTGGTTATTGAAAATAACTATTCATTTATACGGAGGGTTGGCCGAGTGGTCTAAGGCGGCAGACTTAAGATCTGTTGGACGGTTGTCCGCGCGAGTTCGAACCTCGCATCCTTCAGTAATATTTTTTTAATATACATTTTCTCTGCCATCATGGCTTAAAAAATGCTTAAAAGAAGGGAATTAGGGGGGATGGATGAACTAAGACATAACTTTCTTTTCTTCAATTCGAACTCTGTTGGGAAGAGTTGCTTTAAAAAAGACTCTCTATCCATCTATAAAATTTATTAAAACTTTTGAACTGCACAGAATGATTGGCTCACTTAGAAACAAATTTGAGCATTTCAAAGT…	CGGAATTCGATGATATCATTTTTAAAGACGCAGTTAACAGCGCACCTTCTAATTCTCTACTAAAGGCTACTGTCGAACCAGCATCCACGTCGACAATTGCTCAAAGAATAATCAGATCTCATAGAAGCAACGCTTCCCCAGAAAAAGAACTTCATGAAAACAAGCCGAGAAGCACGGAAAAACAGGAACAAAGGGAAATTAGAAGCGATACCAAGGTCAAGCAGCTCTCGTCAAATAATAGAGCAGCTGAAACCCAAATTCCGTTTTTGCAACAAGAATTTTCCAGTGAGGATGAAGATGAAGAATACGTTTACGATGAAGAATTGAACAAAACTTTCAATCGCACGGTGGAGGATATTACCATTGATGATATTTCTAGACATTTGGAGACCTTAGAAA…
721	8880	0	584	0	120	NC_001134	347518	349584	NC_001144	461735	462543	|gene |tRNA note= GO_component: cytosol [goid 0005829] [evidence NAS] |gene |CDS[fcd=-674](+,347877,349382) note= Ybr056wp;	|rRNA |rRNA note= GO_component: cytosolic large ribosomal subunit |gene |CDS[fcd=533](-,462523,462672) note= Ylr154c-gp;	CGGAGGAGCTACTAAAGAAAGAGTGCTGCAATTAATACAATTAATATAAGTGTGGTTATTGAAAATAACTATTCATTTATACGGAGGGTTGGCCGAGTGGTCTAAGGCGGCAGACTTAAGATCTGTTGGACGGTTGTCCGCGCGAGTTCGAACCTCGCATCCTTCAGTAATATTTTTTTAATATACATTTTCTCTGCCATCATGGCTTAAAAAATGCTTAAAAGAAGGGAATTAGGGGGGATGGATGAACTAAGACATAACTTTCTTTTCTTCAATTCGAACTCTGTTGGGAAGAGTTGCTTTAAAAAAGACTCTCTATCCATCTATAAAATTTATTAAAACTTTTGAACTGCACAGAATGATTGGCTCACTTAGAAACAAATTTGAGCATTTCAAAGT…	CGGATCAGCCCCGAATGGGACCTTGAATGCTAGAACGTGGAAAATGAATTCCAGCTCCGCTTCATTGAATAAGTAAAGAAACTATAAAGGTAGTGGTATTTCACTGGCGCCGAAGCTCCCACTTATTCTACACCCTCTATGTCTCTTCACAATGTCAAACTAGAGTCAAGCTCAACAGGGTCTTCTTTCCCCGCTGATTCTGCCAAGCCCGTTCCCTTGGCTGTGGTTTCGCTAGATAGTAGATAGGGACAGTGGGAATCTCGTTAATCCATTCATGCGCGTCACTAATTAGATGACGAGGCATTTGGCTACCTTAAGAGAGTCATAGTTACTCCCGCCGTTTACCCGCGCTTGGTTGAATTTCTTCACTTTGACATTCAGAGCACTGGGCAGAAATCA…
721	8881	0	67	0	2	NC_001134	347518	349584	NC_001144	462544	462591	|gene |tRNA note= GO_component: cytosol [goid 0005829] [evidence NAS] |gene |CDS[fcd=-674](+,347877,349382) note= Ybr056wp;	|rRNA |rRNA note= GO_component: cytosolic large ribosomal subunit |gene |CDS[fcd=105](-,462523,462672) note= Ylr154c-gp;	CGGAGGAGCTACTAAAGAAAGAGTGCTGCAATTAATACAATTAATATAAGTGTGGTTATTGAAAATAACTATTCATTTATACGGAGGGTTGGCCGAGTGGTCTAAGGCGGCAGACTTAAGATCTGTTGGACGGTTGTCCGCGCGAGTTCGAACCTCGCATCCTTCAGTAATATTTTTTTAATATACATTTTCTCTGCCATCATGGCTTAAAAAATGCTTAAAAGAAGGGAATTAGGGGGGATGGATGAACTAAGACATAACTTTCTTTTCTTCAATTCGAACTCTGTTGGGAAGAGTTGCTTTAAAAAAGACTCTCTATCCATCTATAAAATTTATTAAAACTTTTGAACTGCACAGAATGATTGGCTCACTTAGAAACAAATTTGAGCATTTCAAAGT…	CGGAGCCAGCAAAGGTGCTGGCCTCTTCCAGCCATAAGACCCCATCT
721	8883	0	265	0	880	NC_001134	347518	349584	NC_001144	462607	462708	|gene |tRNA note= GO_component: cytosol [goid 0005829] [evidence NAS] |gene |CDS[fcd=-674](+,347877,349382) note= Ybr056wp;	|rRNA |rRNA note= GO_component: cytosolic large ribosomal subunit |gene |CDS[fcd=15](-,462523,462672) note= Ylr154c-gp;	CGGAGGAGCTACTAAAGAAAGAGTGCTGCAATTAATACAATTAATATAAGTGTGGTTATTGAAAATAACTATTCATTTATACGGAGGGTTGGCCGAGTGGTCTAAGGCGGCAGACTTAAGATCTGTTGGACGGTTGTCCGCGCGAGTTCGAACCTCGCATCCTTCAGTAATATTTTTTTAATATACATTTTCTCTGCCATCATGGCTTAAAAAATGCTTAAAAGAAGGGAATTAGGGGGGATGGATGAACTAAGACATAACTTTCTTTTCTTCAATTCGAACTCTGTTGGGAAGAGTTGCTTTAAAAAAGACTCTCTATCCATCTATAAAATTTATTAAAACTTTTGAACTGCACAGAATGATTGGCTCACTTAGAAACAAATTTGAGCATTTCAAAGT…	CGGGGTGATAAGCTGTTAAGAAGAAAAGATAACTCCTCCCAGGGCTCGCGCCGACGTCTCCACATTCAGTTACGTTACCGTGAAGAATCCATATCCAGGTT
721	8862	0	189	0	210	NC_001134	347518	349584	NC_001144	453901	453952	|gene |tRNA note= GO_component: cytosol [goid 0005829] [evidence NAS] |gene |CDS[fcd=-674](+,347877,349382) note= Ybr056wp;	|rRNA |rRNA note= GO_component: cytosolic large ribosomal subunit |neigh_up CDS[fcd=-5611](-,447983,448315) gene= RNH203 note= Rnh203p; |neigh_down CDS[fcd=771](+,454697,455071) gene= TAR1 note= Tar1p;	CGGAGGAGCTACTAAAGAAAGAGTGCTGCAATTAATACAATTAATATAAGTGTGGTTATTGAAAATAACTATTCATTTATACGGAGGGTTGGCCGAGTGGTCTAAGGCGGCAGACTTAAGATCTGTTGGACGGTTGTCCGCGCGAGTTCGAACCTCGCATCCTTCAGTAATATTTTTTTAATATACATTTTCTCTGCCATCATGGCTTAAAAAATGCTTAAAAGAAGGGAATTAGGGGGGATGGATGAACTAAGACATAACTTTCTTTTCTTCAATTCGAACTCTGTTGGGAAGAGTTGCTTTAAAAAAGACTCTCTATCCATCTATAAAATTTATTAAAACTTTTGAACTGCACAGAATGATTGGCTCACTTAGAAACAAATTTGAGCATTTCAAAGT…	CGGTGAGTTGTTACACACTCCTTAGCGGATTCCGACTTCCATGGCCACCGT
721	8863	0	441	0	1	NC_001134	347518	349584	NC_001144	453953	454004	|gene |tRNA note= GO_component: cytosol [goid 0005829] [evidence NAS] |gene |CDS[fcd=-674](+,347877,349382) note= Ybr056wp;	|rRNA |rRNA note= GO_component: cytosolic large ribosomal subunit |neigh_up CDS[fcd=-5663](-,447983,448315) gene= RNH203 note= Rnh203p; |neigh_down CDS[fcd=719](+,454697,455071) gene= TAR1 note= Tar1p;	CGGAGGAGCTACTAAAGAAAGAGTGCTGCAATTAATACAATTAATATAAGTGTGGTTATTGAAAATAACTATTCATTTATACGGAGGGTTGGCCGAGTGGTCTAAGGCGGCAGACTTAAGATCTGTTGGACGGTTGTCCGCGCGAGTTCGAACCTCGCATCCTTCAGTAATATTTTTTTAATATACATTTTCTCTGCCATCATGGCTTAAAAAATGCTTAAAAGAAGGGAATTAGGGGGGATGGATGAACTAAGACATAACTTTCTTTTCTTCAATTCGAACTCTGTTGGGAAGAGTTGCTTTAAAAAAGACTCTCTATCCATCTATAAAATTTATTAAAACTTTTGAACTGCACAGAATGATTGGCTCACTTAGAAACAAATTTGAGCATTTCAAAGT…	CGGCTGTCTAGATGAACTAACACCTTTTGTGGTGTCTGATGAGCGTGTATT
721	8861	0	86	0	10	NC_001134	347518	349584	NC_001144	453584	453900	|gene |tRNA note= GO_component: cytosol [goid 0005829] [evidence NAS] |gene |CDS[fcd=-674](+,347877,349382) note= Ybr056wp;	|rRNA |rRNA note= GO_component: cytosolic large ribosomal subunit |neigh_up CDS[fcd=-5427](-,447983,448315) gene= RNH203 note= Rnh203p; |neigh_down CDS[fcd=955](+,454697,455071) gene= TAR1 note= Tar1p;	CGGAGGAGCTACTAAAGAAAGAGTGCTGCAATTAATACAATTAATATAAGTGTGGTTATTGAAAATAACTATTCATTTATACGGAGGGTTGGCCGAGTGGTCTAAGGCGGCAGACTTAAGATCTGTTGGACGGTTGTCCGCGCGAGTTCGAACCTCGCATCCTTCAGTAATATTTTTTTAATATACATTTTCTCTGCCATCATGGCTTAAAAAATGCTTAAAAGAAGGGAATTAGGGGGGATGGATGAACTAAGACATAACTTTCTTTTCTTCAATTCGAACTCTGTTGGGAAGAGTTGCTTTAAAAAAGACTCTCTATCCATCTATAAAATTTATTAAAACTTTTGAACTGCACAGAATGATTGGCTCACTTAGAAACAAATTTGAGCATTTCAAAGT…	CGGATTCCCTTTCGATGGTGGCCTGCATAAAATCAGGCCTTTGAAACGGAGCTTCCCCATCTCTTAGGATCGACTAACCCACGTCCAACTGCTGTTGACGTGGAACCTTTCCCCACTTCAGTCTTCAAAGTTCTCATTTGAATATTTGCTACTACCACCAAGATCTGCACTAGAGGCCGTTCGACCCGACCTTACGGTCTAGGCTTCGTCACTGACCTCCACGCCTGCCTACTCGTCAGGGCATCATATCAACCCTGACGGTAGAGTATAGGTAACACGCTTGAGCGCCATCCATTTTCAGGGCTAGTTCATTCGG
721	8859	0	258	0	948	NC_001134	347518	349584	NC_001144	453470	453571	|gene |tRNA note= GO_component: cytosol [goid 0005829] [evidence NAS] |gene |CDS[fcd=-674](+,347877,349382) note= Ybr056wp;	|rRNA |rRNA note= GO_component: cytosolic large ribosomal subunit |neigh_up CDS[fcd=-5205](-,447983,448315) gene= RNH203 note= Rnh203p; |neigh_down CDS[fcd=1177](+,454697,455071) gene= TAR1 note= Tar1p;	CGGAGGAGCTACTAAAGAAAGAGTGCTGCAATTAATACAATTAATATAAGTGTGGTTATTGAAAATAACTATTCATTTATACGGAGGGTTGGCCGAGTGGTCTAAGGCGGCAGACTTAAGATCTGTTGGACGGTTGTCCGCGCGAGTTCGAACCTCGCATCCTTCAGTAATATTTTTTTAATATACATTTTCTCTGCCATCATGGCTTAAAAAATGCTTAAAAGAAGGGAATTAGGGGGGATGGATGAACTAAGACATAACTTTCTTTTCTTCAATTCGAACTCTGTTGGGAAGAGTTGCTTTAAAAAAGACTCTCTATCCATCTATAAAATTTATTAAAACTTTTGAACTGCACAGAATGATTGGCTCACTTAGAAACAAATTTGAGCATTTCAAAGT…	CGGGGTGATAAGCTGTTAAGAAGAAAAGATAACTCCTCCCAGGGCTCGCGCCGACGTCTCCACATTCAGTTACGTTACCGTGAAGAATCCATATCCAGGTT
721	8856	0	612	0	150	NC_001134	347518	349584	NC_001144	452598	453406	|gene |tRNA note= GO_component: cytosol [goid 0005829] [evidence NAS] |gene |CDS[fcd=-674](+,347877,349382) note= Ybr056wp;	|rRNA |rRNA note= GO_component: cytosolic large ribosomal subunit |neigh_up CDS[fcd=-4687](-,447983,448315) gene= RNH203 note= Rnh203p; |neigh_down CDS[fcd=1695](+,454697,455071) gene= TAR1 note= Tar1p;	CGGAGGAGCTACTAAAGAAAGAGTGCTGCAATTAATACAATTAATATAAGTGTGGTTATTGAAAATAACTATTCATTTATACGGAGGGTTGGCCGAGTGGTCTAAGGCGGCAGACTTAAGATCTGTTGGACGGTTGTCCGCGCGAGTTCGAACCTCGCATCCTTCAGTAATATTTTTTTAATATACATTTTCTCTGCCATCATGGCTTAAAAAATGCTTAAAAGAAGGGAATTAGGGGGGATGGATGAACTAAGACATAACTTTCTTTTCTTCAATTCGAACTCTGTTGGGAAGAGTTGCTTTAAAAAAGACTCTCTATCCATCTATAAAATTTATTAAAACTTTTGAACTGCACAGAATGATTGGCTCACTTAGAAACAAATTTGAGCATTTCAAAGT…	CGGATCAGCCCCGAATGGGACCTTGAATGCTAGAACGTGGAAAATGAATTCCAGCTCCGCTTCATTGAATAAGTAAAGAAACTATAAAGGTAGTGGTATTTCACTGGCGCCGAAGCTCCCACTTATTCTACACCCTCTATGTCTCTTCACAATGTCAAACTAGAGTCAAGCTCAACAGGGTCTTCTTTCCCCGCTGATTCTGCCAAGCCCGTTCCCTTGGCTGTGGTTTCGCTAGATAGTAGATAGGGACAGTGGGAATCTCGTTAATCCATTCATGCGCGTCACTAATTAGATGACGAGGCATTTGGCTACCTTAAGAGAGTCATAGTTACTCCCGCCGTTTACCCGCGCTTGGTTGAATTTCTTCACTTTGACATTCAGAGCACTGGGCAGAAATCA…
721	8857	0	57	0	0	NC_001134	347518	349584	NC_001144	453407	453454	|gene |tRNA note= GO_component: cytosol [goid 0005829] [evidence NAS] |gene |CDS[fcd=-674](+,347877,349382) note= Ybr056wp;	|rRNA |rRNA note= GO_component: cytosolic large ribosomal subunit |neigh_up CDS[fcd=-5115](-,447983,448315) gene= RNH203 note= Rnh203p; |neigh_down CDS[fcd=1267](+,454697,455071) gene= TAR1 note= Tar1p;	CGGAGGAGCTACTAAAGAAAGAGTGCTGCAATTAATACAATTAATATAAGTGTGGTTATTGAAAATAACTATTCATTTATACGGAGGGTTGGCCGAGTGGTCTAAGGCGGCAGACTTAAGATCTGTTGGACGGTTGTCCGCGCGAGTTCGAACCTCGCATCCTTCAGTAATATTTTTTTAATATACATTTTCTCTGCCATCATGGCTTAAAAAATGCTTAAAAGAAGGGAATTAGGGGGGATGGATGAACTAAGACATAACTTTCTTTTCTTCAATTCGAACTCTGTTGGGAAGAGTTGCTTTAAAAAAGACTCTCTATCCATCTATAAAATTTATTAAAACTTTTGAACTGCACAGAATGATTGGCTCACTTAGAAACAAATTTGAGCATTTCAAAGT…	CGGAGCCAGCAAAGGTGCTGGCCTCTTCCAGCCATAAGACCCCATCT
721	8854	0	8	0	0	NC_001134	347518	349584	NC_001144	451676	451748	|gene |tRNA note= GO_component: cytosol [goid 0005829] [evidence NAS] |gene |CDS[fcd=-674](+,347877,349382) note= Ybr056wp;	|rRNA |rRNA |neigh_up CDS[fcd=-3397](-,447983,448315) gene= RNH203 note= Rnh203p; |neigh_down CDS[fcd=2985](+,454697,455071) gene= TAR1 note= Tar1p;	CGGAGGAGCTACTAAAGAAAGAGTGCTGCAATTAATACAATTAATATAAGTGTGGTTATTGAAAATAACTATTCATTTATACGGAGGGTTGGCCGAGTGGTCTAAGGCGGCAGACTTAAGATCTGTTGGACGGTTGTCCGCGCGAGTTCGAACCTCGCATCCTTCAGTAATATTTTTTTAATATACATTTTCTCTGCCATCATGGCTTAAAAAATGCTTAAAAGAAGGGAATTAGGGGGGATGGATGAACTAAGACATAACTTTCTTTTCTTCAATTCGAACTCTGTTGGGAAGAGTTGCTTTAAAAAAGACTCTCTATCCATCTATAAAATTTATTAAAACTTTTGAACTGCACAGAATGATTGGCTCACTTAGAAACAAATTTGAGCATTTCAAAGT…	CGGATCATAGAATTCTTAAGACAAATAAAATTTATAGAGACTTGTTCAGTCTACTTCTCTCTAAACTAGGCC
721	8855	0	2	0	0	NC_001134	347518	349584	NC_001144	451749	452597	|gene |tRNA note= GO_component: cytosol [goid 0005829] [evidence NAS] |gene |CDS[fcd=-674](+,347877,349382) note= Ybr056wp;	|rRNA |rRNA |rRNA note= GO_component: cytosolic large ribosomal subunit |neigh_up CDS[fcd=-3858](-,447983,448315) gene= RNH203 note= Rnh203p; |neigh_down CDS[fcd=2524](+,454697,455071) gene= TAR1 note= Tar1p;	CGGAGGAGCTACTAAAGAAAGAGTGCTGCAATTAATACAATTAATATAAGTGTGGTTATTGAAAATAACTATTCATTTATACGGAGGGTTGGCCGAGTGGTCTAAGGCGGCAGACTTAAGATCTGTTGGACGGTTGTCCGCGCGAGTTCGAACCTCGCATCCTTCAGTAATATTTTTTTAATATACATTTTCTCTGCCATCATGGCTTAAAAAATGCTTAAAAGAAGGGAATTAGGGGGGATGGATGAACTAAGACATAACTTTCTTTTCTTCAATTCGAACTCTGTTGGGAAGAGTTGCTTTAAAAAAGACTCTCTATCCATCTATAAAATTTATTAAAACTTTTGAACTGCACAGAATGATTGGCTCACTTAGAAACAAATTTGAGCATTTCAAAGT…	CGGCTCCTGCCAGTACCCACTTAGAAAGAAATAAAAAACAAATCAGACAACAAAGGCTTAATCTCAGCAGATCGTAACAACAAGGCTACTCTACTGCTTACAATACCCCGTTGTACATCTAAGTCGTATACAAATGATTTATCCCCACGCAAAATGACATTGCAATTCGCCAGCAAGCACCCAAGGCCTTTCCGCCAAGTGCACCGTTGCTAGCCTGCTATGGTTCAGCGACGCCACAAGGACGCCTTATTCGTATCCATCTATATTGTGTGGAGCAAAGAAATCACCGCGTTCTAGCATGGATTCTGACTTAGAGGCGTTCAGCCATAATCCAGCGGATGGTAGCTTCGCGGCAATGCCTGATCAGACAGCCGCAAAAACCAATTATCCGAATGAACT…
721	8852	0	24	0	10	NC_001134	347518	349584	NC_001144	449848	451472	|gene |tRNA note= GO_component: cytosol [goid 0005829] [evidence NAS] |gene |CDS[fcd=-674](+,347877,349382) note= Ybr056wp;	|rep_origin note= ARS1216 |neigh_up CDS[fcd=-2345](-,447983,448315) gene= RNH203 note= Rnh203p; |neigh_down CDS[fcd=4037](+,454697,455071) gene= TAR1 note= Tar1p;	CGGAGGAGCTACTAAAGAAAGAGTGCTGCAATTAATACAATTAATATAAGTGTGGTTATTGAAAATAACTATTCATTTATACGGAGGGTTGGCCGAGTGGTCTAAGGCGGCAGACTTAAGATCTGTTGGACGGTTGTCCGCGCGAGTTCGAACCTCGCATCCTTCAGTAATATTTTTTTAATATACATTTTCTCTGCCATCATGGCTTAAAAAATGCTTAAAAGAAGGGAATTAGGGGGGATGGATGAACTAAGACATAACTTTCTTTTCTTCAATTCGAACTCTGTTGGGAAGAGTTGCTTTAAAAAAGACTCTCTATCCATCTATAAAATTTATTAAAACTTTTGAACTGCACAGAATGATTGGCTCACTTAGAAACAAATTTGAGCATTTCAAAGT…	CGGGAAAAGCTCTACAAATCTACTAAAAAAGTCAAATATACAGCTGTAAACTTCTTTCCTCGTCTACATCATGGTAACGATTGTTCAATCTTTACTTCGTGTCTTTTTTTTTTTCTATGTACTTTCTATTCCAACCTATGTGAAGACTAAAATTCACCTTAGTAAACGTAAAGACAATGACGATAGGTGCCTAAATCCAATGAAAAGAGCACAAACAGTTTCCATATAATTAGGAGCAGTCTACAATCAAGCAGTAAATTTTGGTATCATAAACGACCCGCTGAGACCTTTCCATTGGGTCAGGTCGAGAACTGTAGTTACTCGAAAATCAGATCATCCACACGCTGTTGAACTCGAAAACAGTAGCACTGTCACTGTAAGCTAGTGTTCATTTTAAAC…
721	8853	0	14	0	6	NC_001134	347518	349584	NC_001144	451473	451675	|gene |tRNA note= GO_component: cytosol [goid 0005829] [evidence NAS] |gene |CDS[fcd=-674](+,347877,349382) note= Ybr056wp;	|rRNA |rRNA |neigh_up CDS[fcd=-3259](-,447983,448315) gene= RNH203 note= Rnh203p; |neigh_down CDS[fcd=3123](+,454697,455071) gene= TAR1 note= Tar1p;	CGGAGGAGCTACTAAAGAAAGAGTGCTGCAATTAATACAATTAATATAAGTGTGGTTATTGAAAATAACTATTCATTTATACGGAGGGTTGGCCGAGTGGTCTAAGGCGGCAGACTTAAGATCTGTTGGACGGTTGTCCGCGCGAGTTCGAACCTCGCATCCTTCAGTAATATTTTTTTAATATACATTTTCTCTGCCATCATGGCTTAAAAAATGCTTAAAAGAAGGGAATTAGGGGGGATGGATGAACTAAGACATAACTTTCTTTTCTTCAATTCGAACTCTGTTGGGAAGAGTTGCTTTAAAAAAGACTCTCTATCCATCTATAAAATTTATTAAAACTTTTGAACTGCACAGAATGATTGGCTCACTTAGAAACAAATTTGAGCATTTCAAAGT…	CGGGCAAATCCTTTCACGCTCGGGAAGCTTTGTGAAAGCCCTTCTCTTTCAACCCATCTTTGCAACGAAAAAAAAAAAAAAAATAAAAAATAAAAAGACCAAATAGTAAATAGTAACTTACATACATTAGTAAATGGTACACTCTTACACACTATCATCCTCATCGTATATTATAATAGATATATACAATACATGTTTTTAC
721	8849	0	193	0	22	NC_001134	347518	349584	NC_001144	448681	448720	|gene |tRNA note= GO_component: cytosol [goid 0005829] [evidence NAS] |gene |CDS[fcd=-674](+,347877,349382) note= Ybr056wp;	|gene |tRNA note= GO_component: cytosol [goid 0005829] [evidence NAS] |neigh_up CDS[fcd=-385](-,447983,448315) gene= RNH203 note= Rnh203p; |neigh_down CDS[fcd=5997](+,454697,455071) gene= TAR1 note= Tar1p;	CGGAGGAGCTACTAAAGAAAGAGTGCTGCAATTAATACAATTAATATAAGTGTGGTTATTGAAAATAACTATTCATTTATACGGAGGGTTGGCCGAGTGGTCTAAGGCGGCAGACTTAAGATCTGTTGGACGGTTGTCCGCGCGAGTTCGAACCTCGCATCCTTCAGTAATATTTTTTTAATATACATTTTCTCTGCCATCATGGCTTAAAAAATGCTTAAAAGAAGGGAATTAGGGGGGATGGATGAACTAAGACATAACTTTCTTTTCTTCAATTCGAACTCTGTTGGGAAGAGTTGCTTTAAAAAAGACTCTCTATCCATCTATAAAATTTATTAAAACTTTTGAACTGCACAGAATGATTGGCTCACTTAGAAACAAATTTGAGCATTTCAAAGT…	CGGATCAAAACCGAAAGTGATAACCACTACACTATAGGA
721	13865	0	1	0	0	NC_001134	347518	349584	NC_001224	4060	4170	|gene |tRNA note= GO_component: cytosol [goid 0005829] [evidence NAS] |gene |CDS[fcd=-674](+,347877,349382) note= Ybr056wp;	|neigh_up NC_001224-start |neigh_down CDS[fcd=9703](+,13818,16322) gene= AI1 note= Reverse transcriptase required for splicing of the	CGGAGGAGCTACTAAAGAAAGAGTGCTGCAATTAATACAATTAATATAAGTGTGGTTATTGAAAATAACTATTCATTTATACGGAGGGTTGGCCGAGTGGTCTAAGGCGGCAGACTTAAGATCTGTTGGACGGTTGTCCGCGCGAGTTCGAACCTCGCATCCTTCAGTAATATTTTTTTAATATACATTTTCTCTGCCATCATGGCTTAAAAAATGCTTAAAAGAAGGGAATTAGGGGGGATGGATGAACTAAGACATAACTTTCTTTTCTTCAATTCGAACTCTGTTGGGAAGAGTTGCTTTAAAAAAGACTCTCTATCCATCTATAAAATTTATTAAAACTTTTGAACTGCACAGAATGATTGGCTCACTTAGAAACAAATTTGAGCATTTCAAAGT…	CGGATATCTTCTTGTTTATCATTTATTATTTTATTAAATTTATTATTATTTTTAATTTATATTTATATTATATAATTAATTATATCGTTTATACTCCTTCGGGGTCCCCG
721	5730	0	196	0	9	NC_001134	347518	349584	NC_001140	134312	134351	|gene |tRNA note= GO_component: cytosol [goid 0005829] [evidence NAS] |gene |CDS[fcd=-674](+,347877,349382) note= Ybr056wp;	|gene |tRNA note= GO_component: cytosol [goid 0005829] [evidence NAS] |neigh_up CDS[fcd=-2291](+,132040,132915) gene= SPO13 note= Spo13p; |neigh_down CDS[fcd=216](+,134547,136526) gene= MIP6 note= Mip6p;	CGGAGGAGCTACTAAAGAAAGAGTGCTGCAATTAATACAATTAATATAAGTGTGGTTATTGAAAATAACTATTCATTTATACGGAGGGTTGGCCGAGTGGTCTAAGGCGGCAGACTTAAGATCTGTTGGACGGTTGTCCGCGCGAGTTCGAACCTCGCATCCTTCAGTAATATTTTTTTAATATACATTTTCTCTGCCATCATGGCTTAAAAAATGCTTAAAAGAAGGGAATTAGGGGGGATGGATGAACTAAGACATAACTTTCTTTTCTTCAATTCGAACTCTGTTGGGAAGAGTTGCTTTAAAAAAGACTCTCTATCCATCTATAAAATTTATTAAAACTTTTGAACTGCACAGAATGATTGGCTCACTTAGAAACAAATTTGAGCATTTCAAAGT…	CGGTCCTATAGTGTAGTGGTTATCACTTTCGGTTTTGAT
721	13879	0	1	0	0	NC_001134	347518	349584	NC_001224	9056	9503	|gene |tRNA note= GO_component: cytosol [goid 0005829] [evidence NAS] |gene |CDS[fcd=-674](+,347877,349382) note= Ybr056wp;	|gene |tRNA |neigh_up NC_001224-start |neigh_down CDS[fcd=4539](+,13818,16322) gene= AI1 note= Reverse transcriptase required for splicing of the	CGGAGGAGCTACTAAAGAAAGAGTGCTGCAATTAATACAATTAATATAAGTGTGGTTATTGAAAATAACTATTCATTTATACGGAGGGTTGGCCGAGTGGTCTAAGGCGGCAGACTTAAGATCTGTTGGACGGTTGTCCGCGCGAGTTCGAACCTCGCATCCTTCAGTAATATTTTTTTAATATACATTTTCTCTGCCATCATGGCTTAAAAAATGCTTAAAAGAAGGGAATTAGGGGGGATGGATGAACTAAGACATAACTTTCTTTTCTTCAATTCGAACTCTGTTGGGAAGAGTTGCTTTAAAAAAGACTCTCTATCCATCTATAAAATTTATTAAAACTTTTGAACTGCACAGAATGATTGGCTCACTTAGAAACAAATTTGAGCATTTCAAAGT…	CGGAACCCCGAAAGGAGAATGTATTATAATTATTACATATAATTATTATTATTCACTTCTTATTAAAAATAATACTCTATATAATTTATATAATTTATTTTAATATATATATATTTATATATAATATAATATATATATTTATTTATTATAATCATTTTTTTTTAACTTAAAATAAAACTTATTATAATTTATATAATTTATAATTTTTATATAAAAATAATTATATAATTTTTATTTATTTATATAATAATAATATTATTTGTTATATATTATATATTATATATATAATAAATAAATAAATAATAAATAATAATAATAAGGATATAGTTTAATGGTAAAACAGTTGATTTCAAATCAATCATTAGGAGTTCGAATCTCTTTATCCTTGATAATAATAAT…
721	882	0	4	0	0	NC_001134	347518	349584	NC_001134	478464	478844	|gene |tRNA note= GO_component: cytosol [goid 0005829] [evidence NAS] |gene |CDS[fcd=-674](+,347877,349382) note= Ybr056wp;	|gene gene= TEF2 |CDS[fcd=-989](+,477665,479041) gene= TEF2 note= Tef2p;	CGGAGGAGCTACTAAAGAAAGAGTGCTGCAATTAATACAATTAATATAAGTGTGGTTATTGAAAATAACTATTCATTTATACGGAGGGTTGGCCGAGTGGTCTAAGGCGGCAGACTTAAGATCTGTTGGACGGTTGTCCGCGCGAGTTCGAACCTCGCATCCTTCAGTAATATTTTTTTAATATACATTTTCTCTGCCATCATGGCTTAAAAAATGCTTAAAAGAAGGGAATTAGGGGGGATGGATGAACTAAGACATAACTTTCTTTTCTTCAATTCGAACTCTGTTGGGAAGAGTTGCTTTAAAAAAGACTCTCTATCCATCTATAAAATTTATTAAAACTTTTGAACTGCACAGAATGATTGGCTCACTTAGAAACAAATTTGAGCATTTCAAAGT…	CGGTGTCATCAAGCCAGGTATGGTTGTTACTTTCGCCCCAGCTGGTGTTACCACTGAAGTCAAGTCCGTTGAAATGCATCACGAACAATTGGAACAAGGTGTTCCAGGTGACAACGTTGGTTTCAACGTCAAGAACGTTTCCGTTAAGGAAATCAGAAGAGGTAACGTCTGTGGTGACGCTAAGAACGATCCACCAAAGGGTTGCGCTTCTTTCAACGCTACCGTCATTGTTTTGAACCATCCAGGTCAAATCTCTGCTGGTTACTCTCCAGTTTTGGATTGTCACACTGCTCACATTGCTTGTAGATTCGACGAATTGTTGGAAAAGAACGACAGAAGATCTGGTAAGAAGTTGGAAGACCATCCAAAGTTCTTGAAGT
721	4222	0	1	0	10	NC_001134	347518	349584	NC_001138	166501	167510	|gene |tRNA note= GO_component: cytosol [goid 0005829] [evidence NAS] |gene |CDS[fcd=-674](+,347877,349382) note= Ybr056wp;	|gene gene= UBP6 |CDS(+,165060,166559) gene= UBP6 note= Ubp6p; |gene gene= AIM13 |CDS(-,166739,167251) gene= AIM13 note= Aim13p; |gene gene= SUP11 gene= SUP11 note= GO_component: cytosol [goid 0005829] [evidence NAS]	CGGAGGAGCTACTAAAGAAAGAGTGCTGCAATTAATACAATTAATATAAGTGTGGTTATTGAAAATAACTATTCATTTATACGGAGGGTTGGCCGAGTGGTCTAAGGCGGCAGACTTAAGATCTGTTGGACGGTTGTCCGCGCGAGTTCGAACCTCGCATCCTTCAGTAATATTTTTTTAATATACATTTTCTCTGCCATCATGGCTTAAAAAATGCTTAAAAGAAGGGAATTAGGGGGGATGGATGAACTAAGACATAACTTTCTTTTCTTCAATTCGAACTCTGTTGGGAAGAGTTGCTTTAAAAAAGACTCTCTATCCATCTATAAAATTTATTAAAACTTTTGAACTGCACAGAATGATTGGCTCACTTAGAAACAAATTTGAGCATTTCAAAGT…	CGGTGGGGGCGAAAGTGATAGTGCACTGATCTTAATGTATAAAGGATTTGGTCTGTAAGTCCATTTTTCATTTTTTCAAAATTAATAGTTTTTTCGGAATATACATATACATTTTTTTACATACACATAAAAATATTTCTCTCCCTTTTACGTTCATCCGCCAATCGATAAAAATGCATTTTATATACATGAAATGGCGAATTCTTTTTGGTCGAGTTTATGTATACTTTTTCTTATTCAACCCATAACGAGCTTCTTGAATTCTTCCATCTCTTCGTAACAATTCAATGGCTTGCCCTTATTGGCCAAAAGACACTCAGTCAATTTTGCCTTTATAGAAATGCTGCCGTTGTCGGTTTTTTTATCAGATTTACCTTTGGCACCCCCATATTTCTCCAA…
721	3502	0	166	0	15	NC_001134	347518	349584	NC_001137	131102	131222	|gene |tRNA note= GO_component: cytosol [goid 0005829] [evidence NAS] |gene |CDS[fcd=-674](+,347877,349382) note= Ybr056wp;	|gene |tRNA note= GO_component: cytosol [goid 0005829] [evidence NAS] |neigh_up CDS[fcd=-2337](+,128825,130561) gene= VAC8 note= Vac8p; |neigh_down CDS[fcd=1958](+,133120,135234) gene= GLC3 note= Glc3p;	CGGAGGAGCTACTAAAGAAAGAGTGCTGCAATTAATACAATTAATATAAGTGTGGTTATTGAAAATAACTATTCATTTATACGGAGGGTTGGCCGAGTGGTCTAAGGCGGCAGACTTAAGATCTGTTGGACGGTTGTCCGCGCGAGTTCGAACCTCGCATCCTTCAGTAATATTTTTTTAATATACATTTTCTCTGCCATCATGGCTTAAAAAATGCTTAAAAGAAGGGAATTAGGGGGGATGGATGAACTAAGACATAACTTTCTTTTCTTCAATTCGAACTCTGTTGGGAAGAGTTGCTTTAAAAAAGACTCTCTATCCATCTATAAAATTTATTAAAACTTTTGAACTGCACAGAATGATTGGCTCACTTAGAAACAAATTTGAGCATTTCAAAGT…	CGGGGTTGTTCGGATCAAAACCGAAAGTGATAACCACTACACTATAAAACCTCTTAATTATTGATTTCCACAATAATTTTATCATATATCAACACTATTCTTCACATAGTTTTTTTAATC
721	7300	0	65	0	3732	NC_001134	347518	349584	NC_001142	542953	543108	|gene |tRNA note= GO_component: cytosol [goid 0005829] [evidence NAS] |gene |CDS[fcd=-674](+,347877,349382) note= Ybr056wp;	|gene gene= SUP4 gene= SUP4 note= GO_component: cytosol [goid 0005829] [evidence NAS] |neigh_up CDS[fcd=-535](-,541785,542495) note= Yjr056cp; |neigh_down CDS[fcd=1025](+,544055,544705) gene= CDC8 note= Cdc8p;	CGGAGGAGCTACTAAAGAAAGAGTGCTGCAATTAATACAATTAATATAAGTGTGGTTATTGAAAATAACTATTCATTTATACGGAGGGTTGGCCGAGTGGTCTAAGGCGGCAGACTTAAGATCTGTTGGACGGTTGTCCGCGCGAGTTCGAACCTCGCATCCTTCAGTAATATTTTTTTAATATACATTTTCTCTGCCATCATGGCTTAAAAAATGCTTAAAAGAAGGGAATTAGGGGGGATGGATGAACTAAGACATAACTTTCTTTTCTTCAATTCGAACTCTGTTGGGAAGAGTTGCTTTAAAAAAGACTCTCTATCCATCTATAAAATTTATTAAAACTTTTGAACTGCACAGAATGATTGGCTCACTTAGAAACAAATTTGAGCATTTCAAAGT…	CGGGGGCGAGTCGAACGCCCGATCTCAAGATTTCGTAGTGATAAATTACAGTCTTGCGCCTTAAACCAACTTGGCTACCGAGAGTATTTAATTGTTGAAGAAAGAGTATACTACATAACACATATACAATTGAAAAAGAGATTTCAAATAATTAT
721	2549	0	367	0	41	NC_001134	347518	349584	NC_001136	802758	804419	|gene |tRNA note= GO_component: cytosol [goid 0005829] [evidence NAS] |gene |CDS[fcd=-674](+,347877,349382) note= Ybr056wp;	|gene |tRNA note= GO_component: cytosol [goid 0005829] [evidence NAS] |LTR note= YDRWDELTA11 |gene |CDS[fcd=-396](+,803192,804514) note= Ydr170w-ap;	CGGAGGAGCTACTAAAGAAAGAGTGCTGCAATTAATACAATTAATATAAGTGTGGTTATTGAAAATAACTATTCATTTATACGGAGGGTTGGCCGAGTGGTCTAAGGCGGCAGACTTAAGATCTGTTGGACGGTTGTCCGCGCGAGTTCGAACCTCGCATCCTTCAGTAATATTTTTTTAATATACATTTTCTCTGCCATCATGGCTTAAAAAATGCTTAAAAGAAGGGAATTAGGGGGGATGGATGAACTAAGACATAACTTTCTTTTCTTCAATTCGAACTCTGTTGGGAAGAGTTGCTTTAAAAAAGACTCTCTATCCATCTATAAAATTTATTAAAACTTTTGAACTGCACAGAATGATTGGCTCACTTAGAAACAAATTTGAGCATTTCAAAGT…	CGGATCAAAACCGAAAGTGATAACCACTACACTATAGGACCGACAATTCATGTTAAATCCTCCTTTTTTAGGCTTTTATAAGTTACTTTGACTAGAGATGACTAGAAATGATTATATTACACGCACACACAATACACACATAGTGTTGGAATAAAAATCCACTATCGTCTATCAACTAATAGTTATATTATCAATATATTATCATATACGGTGTTAAGATGATGACATAAGTTATGAGAAGCTGTCATCGAAGTTAGAGGAAGCTGAAGTGCAAGGATTGATAATGTAATAGGATAATGAAACATATAAAACAGAATGAGGAATAATCGTAATATTGGTATATAGAAATATAGATTCCATTATGGGGATTCCTGACCCTCGAGGAGAACTTCTAGTATA…
721	6192	0	1	0	0	NC_001134	347518	349584	NC_001140	526647	526781	|gene |tRNA note= GO_component: cytosol [goid 0005829] [evidence NAS] |gene |CDS[fcd=-674](+,347877,349382) note= Ybr056wp;	|gene gene= FLO5 |CDS[fcd=-1322](+,525392,528619) gene= FLO5 note= Flo5p;	CGGAGGAGCTACTAAAGAAAGAGTGCTGCAATTAATACAATTAATATAAGTGTGGTTATTGAAAATAACTATTCATTTATACGGAGGGTTGGCCGAGTGGTCTAAGGCGGCAGACTTAAGATCTGTTGGACGGTTGTCCGCGCGAGTTCGAACCTCGCATCCTTCAGTAATATTTTTTTAATATACATTTTCTCTGCCATCATGGCTTAAAAAATGCTTAAAAGAAGGGAATTAGGGGGGATGGATGAACTAAGACATAACTTTCTTTTCTTCAATTCGAACTCTGTTGGGAAGAGTTGCTTTAAAAAAGACTCTCTATCCATCTATAAAATTTATTAAAACTTTTGAACTGCACAGAATGATTGGCTCACTTAGAAACAAATTTGAGCATTTCAAAGT…	CGGTACTTTCACCTCTACATCCACTGAGGTTACCACCATCACTGGTACCAACGGTCAACCAACTGACGAAACCGTGATTGTCATTAGAACTCCAACTAGTGAGGGTTTGATTACTACAACTACCGAACCATGGA
721	396	0	15	0	0	NC_001134	347518	349584	NC_001134	88636	88935	|gene |tRNA note= GO_component: cytosol [goid 0005829] [evidence NAS] |gene |CDS[fcd=-674](+,347877,349382) note= Ybr056wp;	|gene gene= RPS8A |CDS[fcd=338](-,88521,89123) gene= RPS8A note= Rps8ap;	CGGAGGAGCTACTAAAGAAAGAGTGCTGCAATTAATACAATTAATATAAGTGTGGTTATTGAAAATAACTATTCATTTATACGGAGGGTTGGCCGAGTGGTCTAAGGCGGCAGACTTAAGATCTGTTGGACGGTTGTCCGCGCGAGTTCGAACCTCGCATCCTTCAGTAATATTTTTTTAATATACATTTTCTCTGCCATCATGGCTTAAAAAATGCTTAAAAGAAGGGAATTAGGGGGGATGGATGAACTAAGACATAACTTTCTTTTCTTCAATTCGAACTCTGTTGGGAAGAGTTGCTTTAAAAAAGACTCTCTATCCATCTATAAAATTTATTAAAACTTTTGAACTGCACAGAATGATTGGCTCACTTAGAAACAAATTTGAGCATTTCAAAGT…	CGGCGCTGAATTGAGATTCAACGGAAGATTCGATCTTGGCAGAAGCAGCTCTAGCAGCCCACTTTCTTTCAGCGTTCTTGCTCTTGGCAACAGTTTCTTCTTCCTTGACGTTCTTCTTCTTACCCAAGGTTTGACCGTAGTGAGCTTCGAACCATTGTCTGAATGGAGTAGCATCAATTTGGACAATGGCAGCCTTGGTCAAAGTGTTAGTTCTAACCAATTCATTGTTGGATGGATGGTAAACAACACCAGCAATTCTGGTCTTCTTGGAGATACCTTCAGAAGCCCAAGAAAAGTTA
721	9178	0	5	0	0	NC_001134	347518	349584	NC_001144	705083	708504	|gene |tRNA note= GO_component: cytosol [goid 0005829] [evidence NAS] |gene |CDS[fcd=-674](+,347877,349382) note= Ybr056wp;	|gene |CDS(+,705188,706132) note= Ylr283wp; |gene gene= ECI1 |CDS(-,706200,707042) gene= ECI1 note= Eci1p; |gene gene= NNT1 |CDS(+,707362,708147) gene= NNT1 note= Nnt1p; |gene |CDS(-,708170,708340) note= Ylr285c-ap; |gene gene= CTS1 |CDS(-,708450,710138) gene= CTS1 note= Cts1p;	CGGAGGAGCTACTAAAGAAAGAGTGCTGCAATTAATACAATTAATATAAGTGTGGTTATTGAAAATAACTATTCATTTATACGGAGGGTTGGCCGAGTGGTCTAAGGCGGCAGACTTAAGATCTGTTGGACGGTTGTCCGCGCGAGTTCGAACCTCGCATCCTTCAGTAATATTTTTTTAATATACATTTTCTCTGCCATCATGGCTTAAAAAATGCTTAAAAGAAGGGAATTAGGGGGGATGGATGAACTAAGACATAACTTTCTTTTCTTCAATTCGAACTCTGTTGGGAAGAGTTGCTTTAAAAAAGACTCTCTATCCATCTATAAAATTTATTAAAACTTTTGAACTGCACAGAATGATTGGCTCACTTAGAAACAAATTTGAGCATTTCAAAGT…	CGGGGAAAATGCACAGTTTAGTTAAGTGTATAGTAATTTTATCGATAAAGGAAGAATGGAAGAGGTTTATGTATACATGTAAACTCTGAACATCTAATAGACTAATGATGCGGTTAATACGTACATTGCCGCTTCGATGCTTCAAAACTAGAATACGGCGGCAAGGCTCGTTGTTGTGTTTGCGGTGCTTTAGTTCGTATTCAAAACCACTTTTGCAGAAATCAATGTCATTGAAAAATATCCAGTTATCAGACCTATCCTCATCGCCATTATCCAAGAACAAGGAGAAGCAGGAGAAGCCAGAGAAGGAAAACGAAGGAAAGCACTCCATTGGCCTGTTAGACAGATTTTCAGAGGACTTTATTACTCAGGGCAATGGATTGAAACCTACTACTTCAC…
721	14012	0	65	0	0	NC_001134	347518	349584	NC_001224	64549	65061	|gene |tRNA note= GO_component: cytosol [goid 0005829] [evidence NAS] |gene |CDS[fcd=-674](+,347877,349382) note= Ybr056wp;	|gene |tRNA |neigh_up CDS[fcd=-3783](+,61022,61729) gene= SCEI note= Sceip |neigh_down CDS[fcd=8953](+,73758,74513) gene= COX2 note= Subunit II of cytochrome c oxidase, which is the	CGGAGGAGCTACTAAAGAAAGAGTGCTGCAATTAATACAATTAATATAAGTGTGGTTATTGAAAATAACTATTCATTTATACGGAGGGTTGGCCGAGTGGTCTAAGGCGGCAGACTTAAGATCTGTTGGACGGTTGTCCGCGCGAGTTCGAACCTCGCATCCTTCAGTAATATTTTTTTAATATACATTTTCTCTGCCATCATGGCTTAAAAAATGCTTAAAAGAAGGGAATTAGGGGGGATGGATGAACTAAGACATAACTTTCTTTTCTTCAATTCGAACTCTGTTGGGAAGAGTTGCTTTAAAAAAGACTCTCTATCCATCTATAAAATTTATTAAAACTTTTGAACTGCACAGAATGATTGGCTCACTTAGAAACAAATTTGAGCATTTCAAAGT…	CGGAAGGAGATAAATATATATATATTTATAATAATTATATAATAAAGGTGAATATATTTCAATGGTAGAAAATACGCTTGTGGTGCGTTAAATCTGAGTTCGATTCTCAGTATTCACCCTATAAATAATAATAATAATATATTTTATTATTCTTAAATTTTTTATTCTTTATATTATATATATAATATTAATATTATTACTTTTTAATAACAAAATATTATAATTAATTGATATATATATATACCAAATATAATTAATTGAAATTAAATAATAAATAAAATATTTACTTCTTTATTAAAATTCTAATTAATTGATTCTTTTTATTGAATATTAAATTCTATTATAACTTATTAATTAATTAATTAATTAATTATAATAATAATAATATTTATTATTAAT…
721	6257	0	3	0	0	NC_001134	347518	349584	NC_001141	20517	20783	|gene |tRNA note= GO_component: cytosol [goid 0005829] [evidence NAS] |gene |CDS[fcd=-674](+,347877,349382) note= Ybr056wp;	|gene gene= HXT12 note= YIL170W |neigh_up CDS[fcd=-2097](-,16784,18553) note= Yil172cp; |neigh_down CDS[fcd=5456](-,23119,26106) note= Yil169cp;	CGGAGGAGCTACTAAAGAAAGAGTGCTGCAATTAATACAATTAATATAAGTGTGGTTATTGAAAATAACTATTCATTTATACGGAGGGTTGGCCGAGTGGTCTAAGGCGGCAGACTTAAGATCTGTTGGACGGTTGTCCGCGCGAGTTCGAACCTCGCATCCTTCAGTAATATTTTTTTAATATACATTTTCTCTGCCATCATGGCTTAAAAAATGCTTAAAAGAAGGGAATTAGGGGGGATGGATGAACTAAGACATAACTTTCTTTTCTTCAATTCGAACTCTGTTGGGAAGAGTTGCTTTAAAAAAGACTCTCTATCCATCTATAAAATTTATTAAAACTTTTGAACTGCACAGAATGATTGGCTCACTTAGAAACAAATTTGAGCATTTCAAAGT…	CGGTGACAACTACTTCTTTTACTACGGTACCACCATCTTCAAATCTGTCGGTCTAAAGGACTCCTTTCAAACTTCGATCATCATTGGTGTGGTCAATTTTTTCTCTTCATTCATAGCGGTATACACCATTGAGAGGTTTGGACGCCGTACGTGTCTATTGTGGGGTGCTGCTTCTATGCTGTGCTGCTTTGCTGTCTTTGCCTCCGTTGGTGTGACAAAGCTGTGGCCTCAAGGAAGCAGTCACCAAGACATTACTTCTCAGGGTG
721	14024	0	1	0	0	NC_001134	347518	349584	NC_001224	67981	68676	|gene |tRNA note= GO_component: cytosol [goid 0005829] [evidence NAS] |gene |CDS[fcd=-674](+,347877,349382) note= Ybr056wp;	|gene |tRNA |neigh_up CDS[fcd=-7306](+,61022,61729) gene= SCEI note= Sceip |neigh_down CDS[fcd=5430](+,73758,74513) gene= COX2 note= Subunit II of cytochrome c oxidase, which is the	CGGAGGAGCTACTAAAGAAAGAGTGCTGCAATTAATACAATTAATATAAGTGTGGTTATTGAAAATAACTATTCATTTATACGGAGGGTTGGCCGAGTGGTCTAAGGCGGCAGACTTAAGATCTGTTGGACGGTTGTCCGCGCGAGTTCGAACCTCGCATCCTTCAGTAATATTTTTTTAATATACATTTTCTCTGCCATCATGGCTTAAAAAATGCTTAAAAGAAGGGAATTAGGGGGGATGGATGAACTAAGACATAACTTTCTTTTCTTCAATTCGAACTCTGTTGGGAAGAGTTGCTTTAAAAAAGACTCTCTATCCATCTATAAAATTTATTAAAACTTTTGAACTGCACAGAATGATTGGCTCACTTAGAAACAAATTTGAGCATTTCAAAGT…	CGGAACTATAATATATTTTAATATATTTTTTATTACTCCTCCTTTGGGGTCCGCCCCGCGGGGGCGGGGCGGACTATAATAATTTTTTATTGATAAAAAAGTATATATAATATAATTAATATATTTCTTTTTATATAAATTATAAATATTATTTTATAATAAAAAAAGTATATATAATATTATATATTTAATAAATAATATAATAATAATATAAATAAATATATATATATTATTAATATATTAAATTTTATAATAATAATTATAATAATAGTAGTAGGTATAAATTTTAATAAAGAGTTTTATTCCAATGGAGTAATAATAATAATAATAATAAAATAAAGGATCTGTAGCTTAATAGTAAAGTACCATTTTGTCATAATGGAGGATGTCAGTGCAAAT…
721	11600	0	2	0	2	NC_001134	347518	349584	NC_001147	26272	26538	|gene |tRNA note= GO_component: cytosol [goid 0005829] [evidence NAS] |gene |CDS[fcd=-674](+,347877,349382) note= Ybr056wp;	|gene gene= HXT11 note= synonym: LGT3 |CDS[fcd=-1133](+,25272,26975) gene= HXT11 note= Hxt11p;	CGGAGGAGCTACTAAAGAAAGAGTGCTGCAATTAATACAATTAATATAAGTGTGGTTATTGAAAATAACTATTCATTTATACGGAGGGTTGGCCGAGTGGTCTAAGGCGGCAGACTTAAGATCTGTTGGACGGTTGTCCGCGCGAGTTCGAACCTCGCATCCTTCAGTAATATTTTTTTAATATACATTTTCTCTGCCATCATGGCTTAAAAAATGCTTAAAAGAAGGGAATTAGGGGGGATGGATGAACTAAGACATAACTTTCTTTTCTTCAATTCGAACTCTGTTGGGAAGAGTTGCTTTAAAAAAGACTCTCTATCCATCTATAAAATTTATTAAAACTTTTGAACTGCACAGAATGATTGGCTCACTTAGAAACAAATTTGAGCATTTCAAAGT…	CGGTGACAACTACTTCTTTTACTACGGTACCACCATCTTCAAATCTGTCGGTCTAAAGGACTCCTTTCAGACTTCGATCATTATCGGTGTGGTTAATTTTTTCTCTTCATTCATAGCGGTATACACCATTGAGAGGTTTGGACGCCGTACGTGTCTATTGTGGGGTGCTGCTTCTATGCTATGCTGCTTTGCTGTGTTTGCCTCCGTCGGTGTGACAAAGTTGTGGCCTCAAGGAAGCAGTCACCAAGACATTACTTCTCAGGGCG
721	2392	0	188	0	20	NC_001134	347518	349584	NC_001136	645180	647818	|gene |tRNA note= GO_component: cytosol [goid 0005829] [evidence NAS] |gene |CDS[fcd=-674](+,347877,349382) note= Ybr056wp;	|gene |tRNA note= GO_component: cytosol [goid 0005829] [evidence NAS] |repeat_region note= Transposon YDRCTY1-1; Long Terminal Repeat (LTR) |LTR note= YDRCDELTA7 |gene note= Ydr098c-bp; |neigh_up CDS[fcd=-1467](-,644175,645032) gene= GRX3 note= Grx3p; |neigh_down CDS[fcd=4624](-,649801,651123) note= Ydr098c-ap;	CGGAGGAGCTACTAAAGAAAGAGTGCTGCAATTAATACAATTAATATAAGTGTGGTTATTGAAAATAACTATTCATTTATACGGAGGGTTGGCCGAGTGGTCTAAGGCGGCAGACTTAAGATCTGTTGGACGGTTGTCCGCGCGAGTTCGAACCTCGCATCCTTCAGTAATATTTTTTTAATATACATTTTCTCTGCCATCATGGCTTAAAAAATGCTTAAAAGAAGGGAATTAGGGGGGATGGATGAACTAAGACATAACTTTCTTTTCTTCAATTCGAACTCTGTTGGGAAGAGTTGCTTTAAAAAAGACTCTCTATCCATCTATAAAATTTATTAAAACTTTTGAACTGCACAGAATGATTGGCTCACTTAGAAACAAATTTGAGCATTTCAAAGT…	CGGATCAAAACCGAAAGTGATAACCACTACACTATAGGACCGTAACAACTGTGTATTGTTGTATTACGGGCTCGAGTAATACCGCAGTGTCTTGACAATCCTAATATAAACAGTCTTAGGGAAGTAACCAGTTGTCAAAACAGTTTATCAGATTAATTCACGGAATGTCACTTATCTTATATATTATATAAAATATGAATCATACTAAGTGGTGGAAGCGCGGAATCTCGGATCTAAACTAATTGTTCAAGCATTTATACGTTTGGGTAGTTCAGCTAGGGAAGGCCGTGTTTTATCTCATGTTGTTCGTTTTGTTATTGAGATATATGTGGGTAATTAGATAATTGTTGGGATTCCATTGTTGATAAAGGCTATAATATTAGGTATACAGAATATACT…
721	10532	0	158	1875	7405	NC_001134	347518	349584	NC_001145	837399	838007	|gene |tRNA note= GO_component: cytosol [goid 0005829] [evidence NAS] |gene |CDS[fcd=-674](+,347877,349382) note= Ybr056wp;	|LTR note= YMRWDELTA21 |gene gene= SUP8 gene= SUP8 note= GO_component: cytosol [goid 0005829] [evidence NAS] |neigh_up CDS[fcd=-837](-,835325,836866) gene= RIT1 note= Rit1p; |neigh_down CDS[fcd=483](+,838186,839994) gene= YKU70 note= Yku70p;	CGGAGGAGCTACTAAAGAAAGAGTGCTGCAATTAATACAATTAATATAAGTGTGGTTATTGAAAATAACTATTCATTTATACGGAGGGTTGGCCGAGTGGTCTAAGGCGGCAGACTTAAGATCTGTTGGACGGTTGTCCGCGCGAGTTCGAACCTCGCATCCTTCAGTAATATTTTTTTAATATACATTTTCTCTGCCATCATGGCTTAAAAAATGCTTAAAAGAAGGGAATTAGGGGGGATGGATGAACTAAGACATAACTTTCTTTTCTTCAATTCGAACTCTGTTGGGAAGAGTTGCTTTAAAAAAGACTCTCTATCCATCTATAAAATTTATTAAAACTTTTGAACTGCACAGAATGATTGGCTCACTTAGAAACAAATTTGAGCATTTCAAAGT…	CGGATGCTCAAATTTAAAGTGATTACTCAGTTATAAACACGCCTGGTGTGAAATTAACGACCATTAATAAGAATAAATATTACTGGCATATTATAATATGCGGTGGAAAAACATAAAATAAGGATTGAGAAATAGTTATCAAGTATAATGGAAGCTGAAGTGCAAGGATTGATAATGTAATAGGATAATGAAACATATAAACGGAATGAGGAATAATCGTAATTTTATTATGTAGAAATATAGATTCCATTTTGAGATTTCTATCCTCGAGGAGAACTTCTAATATATTCTGTGTACATAATATTATATAGCCTTGATCAACAATGCAATCCCAACAATTATCAAATTATTCACCCAATATTCAGTATAATCCATATTTATAGAATATATAGGATAATT…
721	1453	0	176	0	16	NC_001134	347518	349584	NC_001135	168327	168492	|gene |tRNA note= GO_component: cytosol [goid 0005829] [evidence NAS] |gene |CDS[fcd=-674](+,347877,349382) note= Ybr056wp;	|gene |tRNA note= GO_component: cytosol [goid 0005829] [evidence NAS] |neigh_up CDS[fcd=-414](-,167366,167995) gene= RHB1 note= Rhb1p; |neigh_down CDS[fcd=4011](-,170882,172420) gene= FEN2 note= Fen2p;	CGGAGGAGCTACTAAAGAAAGAGTGCTGCAATTAATACAATTAATATAAGTGTGGTTATTGAAAATAACTATTCATTTATACGGAGGGTTGGCCGAGTGGTCTAAGGCGGCAGACTTAAGATCTGTTGGACGGTTGTCCGCGCGAGTTCGAACCTCGCATCCTTCAGTAATATTTTTTTAATATACATTTTCTCTGCCATCATGGCTTAAAAAATGCTTAAAAGAAGGGAATTAGGGGGGATGGATGAACTAAGACATAACTTTCTTTTCTTCAATTCGAACTCTGTTGGGAAGAGTTGCTTTAAAAAAGACTCTCTATCCATCTATAAAATTTATTAAAACTTTTGAACTGCACAGAATGATTGGCTCACTTAGAAACAAATTTGAGCATTTCAAAGT…	CGGATCAAAACCGAAAGTGATAACCACTACACTATAGGACCAGGACTTCTTGTAATATTTTGTATCTCAAAATGAGGTATGTCAGTATGACAATACGTCATCCTAAACGTTCATAAAACACATATGAAACAACCTTATAACAAAACGAACAACATGAGATAAAAC
721	12196	0	0	1	1	NC_001134	347518	349584	NC_001147	530023	530135	|gene |tRNA note= GO_component: cytosol [goid 0005829] [evidence NAS] |gene |CDS[fcd=-674](+,347877,349382) note= Ybr056wp;	|gene gene= TFC7 |CDS[fcd=-1137](+,528942,530249) gene= TFC7 note= Tfc7p;	CGGAGGAGCTACTAAAGAAAGAGTGCTGCAATTAATACAATTAATATAAGTGTGGTTATTGAAAATAACTATTCATTTATACGGAGGGTTGGCCGAGTGGTCTAAGGCGGCAGACTTAAGATCTGTTGGACGGTTGTCCGCGCGAGTTCGAACCTCGCATCCTTCAGTAATATTTTTTTAATATACATTTTCTCTGCCATCATGGCTTAAAAAATGCTTAAAAGAAGGGAATTAGGGGGGATGGATGAACTAAGACATAACTTTCTTTTCTTCAATTCGAACTCTGTTGGGAAGAGTTGCTTTAAAAAAGACTCTCTATCCATCTATAAAATTTATTAAAACTTTTGAACTGCACAGAATGATTGGCTCACTTAGAAACAAATTTGAGCATTTCAAAGT…	CGGTCTACTATCACCGACTGAAGAGAATGAAACAACAAATGCTGGTCAAAGTAAAGGCTCATCGACTGCCAACGACCCAAACATACAAATACAAGAAGAAGACGTTGGACTA
721	9498	0	0	1	1	NC_001134	347518	349584	NC_001144	992275	994243	|gene |tRNA note= GO_component: cytosol [goid 0005829] [evidence NAS] |gene |CDS[fcd=-674](+,347877,349382) note= Ybr056wp;	|gene gene= CRN1 |CDS(+,990774,992729) gene= CRN1 note= Crn1p; |gene gene= SEN1 note= synonyms: NRD2, CIK3 |CDS(+,993431,1000126) gene= SEN1 note= Sen1p;	CGGAGGAGCTACTAAAGAAAGAGTGCTGCAATTAATACAATTAATATAAGTGTGGTTATTGAAAATAACTATTCATTTATACGGAGGGTTGGCCGAGTGGTCTAAGGCGGCAGACTTAAGATCTGTTGGACGGTTGTCCGCGCGAGTTCGAACCTCGCATCCTTCAGTAATATTTTTTTAATATACATTTTCTCTGCCATCATGGCTTAAAAAATGCTTAAAAGAAGGGAATTAGGGGGGATGGATGAACTAAGACATAACTTTCTTTTCTTCAATTCGAACTCTGTTGGGAAGAGTTGCTTTAAAAAAGACTCTCTATCCATCTATAAAATTTATTAAAACTTTTGAACTGCACAGAATGATTGGCTCACTTAGAAACAAATTTGAGCATTTCAAAGT…	CGGATGGGAAGAAGCCGATGATGAGCCAGCTCCTATCAAAATCGAAACCCCAGTCACTCCAACAGAAACTAAAAAGGATCGCACACCTAAGGTCGAACCTTCAAAAGAATTGAAGCCAGAGCCAGTGTCTATCGCAACAGATAGAAAACAGGAGCAAAGCTTACCTCAAGAAGAGAAGTCCTCTGAGAAAACAAAGTCCCCTGAGCAGGAAAAATCCGCAACACCTCCTTCTTCAATTACGGCTGCTAAGACAGCCATTACTGCCAGCAGTAAGGAAGAGCCATCCGCGGCAAGGACATCACCTAAGTCATTGGGTTTAAAAAAGTCTGTCGAAAAACTATCTACATTGGTTCTGCAATTAGAAGATGTAGTTGATAAATTAACGAAAGCAAATCTTGA…
721	11414	0	0	4	4	NC_001134	347518	349584	NC_001146	649592	650059	|gene |tRNA note= GO_component: cytosol [goid 0005829] [evidence NAS] |gene |CDS[fcd=-674](+,347877,349382) note= Ybr056wp;	|gene gene= PHO91 |CDS[fcd=1889](-,649030,651714) gene= PHO91 note= Pho91p;	CGGAGGAGCTACTAAAGAAAGAGTGCTGCAATTAATACAATTAATATAAGTGTGGTTATTGAAAATAACTATTCATTTATACGGAGGGTTGGCCGAGTGGTCTAAGGCGGCAGACTTAAGATCTGTTGGACGGTTGTCCGCGCGAGTTCGAACCTCGCATCCTTCAGTAATATTTTTTTAATATACATTTTCTCTGCCATCATGGCTTAAAAAATGCTTAAAAGAAGGGAATTAGGGGGGATGGATGAACTAAGACATAACTTTCTTTTCTTCAATTCGAACTCTGTTGGGAAGAGTTGCTTTAAAAAAGACTCTCTATCCATCTATAAAATTTATTAAAACTTTTGAACTGCACAGAATGATTGGCTCACTTAGAAACAAATTTGAGCATTTCAAAGT…	CGGAGATTTGGTTTGAAAGACACCAAAGAACAATTGTTATAATGCAAACTAAAGTGACAAACCATTGCTTCAGAGTGAATGGATCACGGGATGGATGCAATTGCAAAATTTTCACATTTGGCTCAGGAGGGAAGGTTATGATCAATAGCACCCAAATTGCCATGACACAAATAAAGCACACAGGTAGCGCAATCATAAACCATTCAGCCCAAGATGGTGAAGGGTCCATTATACCAATAGAAAAAATGTTTTGAGGAGAAGCGATGGGAGAAGACATACCACCGATATTGGAGGCAAGAGCGATACCAAGAATTAGAGCTTTGGCATAGGAACAATTTCTTGGCAGTGTTCTGAGCAAAGGTTGAACAATTGAATAGCAAAGAACGGGGGCAGCAACAT…
721	10992	0	0	2	2	NC_001134	347518	349584	NC_001146	280248	280376	|gene |tRNA note= GO_component: cytosol [goid 0005829] [evidence NAS] |gene |CDS[fcd=-674](+,347877,349382) note= Ybr056wp;	|neigh_up CDS[fcd=-3809](+,276503,279898) gene= CHS1 note= Chs1p; |neigh_down CDS[fcd=121](+,280433,281506) gene= DUG3 note= Dug3p;	CGGAGGAGCTACTAAAGAAAGAGTGCTGCAATTAATACAATTAATATAAGTGTGGTTATTGAAAATAACTATTCATTTATACGGAGGGTTGGCCGAGTGGTCTAAGGCGGCAGACTTAAGATCTGTTGGACGGTTGTCCGCGCGAGTTCGAACCTCGCATCCTTCAGTAATATTTTTTTAATATACATTTTCTCTGCCATCATGGCTTAAAAAATGCTTAAAAGAAGGGAATTAGGGGGGATGGATGAACTAAGACATAACTTTCTTTTCTTCAATTCGAACTCTGTTGGGAAGAGTTGCTTTAAAAAAGACTCTCTATCCATCTATAAAATTTATTAAAACTTTTGAACTGCACAGAATGATTGGCTCACTTAGAAACAAATTTGAGCATTTCAAAGT…	CGGACCCTTGAAACTGTGGCGCTTTTTAAGACGCATCTCCAAAAAAAGAAAAAGAACAAAAGAAAAAAAGCTGCAAATATATATACAAAACAGATTTCACGTTTATTGCTTGGGAGTAAGGTAACGAT
721	7897	0	0	1	1	NC_001134	347518	349584	NC_001143	295060	295251	|gene |tRNA note= GO_component: cytosol [goid 0005829] [evidence NAS] |gene |CDS[fcd=-674](+,347877,349382) note= Ybr056wp;	|gene gene= MUD2 |CDS[fcd=682](-,294254,295837) gene= MUD2 note= Mud2p;	CGGAGGAGCTACTAAAGAAAGAGTGCTGCAATTAATACAATTAATATAAGTGTGGTTATTGAAAATAACTATTCATTTATACGGAGGGTTGGCCGAGTGGTCTAAGGCGGCAGACTTAAGATCTGTTGGACGGTTGTCCGCGCGAGTTCGAACCTCGCATCCTTCAGTAATATTTTTTTAATATACATTTTCTCTGCCATCATGGCTTAAAAAATGCTTAAAAGAAGGGAATTAGGGGGGATGGATGAACTAAGACATAACTTTCTTTTCTTCAATTCGAACTCTGTTGGGAAGAGTTGCTTTAAAAAAGACTCTCTATCCATCTATAAAATTTATTAAAACTTTTGAACTGCACAGAATGATTGGCTCACTTAGAAACAAATTTGAGCATTTCAAAGT…	CGGCCTTCCTTCACCAATATAAAAGTTGGAAATTTTAAAGTCCTCCGCATTACTCTCAGTTTTCTGGAGACCTGAAATAAAATTTTCCAGCAAATCTTTCAATCTTGCTACAATGCTGGGGTCGCTGCTTTGAGACAAGCCCGAAATTACAAGCCTTGAATTTGCCTTGGATGAGGCCATGTTGTAGTAAG
721	11417	0	0	1	1	NC_001134	347518	349584	NC_001146	651014	651936	|gene |tRNA note= GO_component: cytosol [goid 0005829] [evidence NAS] |gene |CDS[fcd=-674](+,347877,349382) note= Ybr056wp;	|gene gene= PHO91 |CDS[fcd=239](-,649030,651714) gene= PHO91 note= Pho91p;	CGGAGGAGCTACTAAAGAAAGAGTGCTGCAATTAATACAATTAATATAAGTGTGGTTATTGAAAATAACTATTCATTTATACGGAGGGTTGGCCGAGTGGTCTAAGGCGGCAGACTTAAGATCTGTTGGACGGTTGTCCGCGCGAGTTCGAACCTCGCATCCTTCAGTAATATTTTTTTAATATACATTTTCTCTGCCATCATGGCTTAAAAAATGCTTAAAAGAAGGGAATTAGGGGGGATGGATGAACTAAGACATAACTTTCTTTTCTTCAATTCGAACTCTGTTGGGAAGAGTTGCTTTAAAAAAGACTCTCTATCCATCTATAAAATTTATTAAAACTTTTGAACTGCACAGAATGATTGGCTCACTTAGAAACAAATTTGAGCATTTCAAAGT…	CGGTCTGGTTCAACTCAATAAAGTCCTTCAACTCGGACAACTGGGTGTAGATCGATATCAATCTTTTCTTTAAAGAGAGCCTATGTTGGGTAAAAGGAGAAAGATACACAGGGTTAGAGTTAGAAAGCGACACTGAAGCGGAGGCCAGGTTTTGCATTGAGTTACCATTATTAGTCGTGTTCGAGACCTGCGTGTGGATGACGGGTGCAGAGTCAATCGACATGTCTGTCAGAGAGGGGTTGGAGTCCGTGGAGGAGACACTACTAAACCTTCTTTGGCGTTGTTGTGACTTAGACTTCCTGTTTCTTGCAACACTTTGCAGTTGATGCTGTTGCTGCTGATTAAACAATTGGGTGGCCTTGTTCGTGTTTTCCAGTTCCATGACATCGTCCTTCAATT…
721	5700	0	0	11	11	NC_001134	347518	349584	NC_001140	108577	110471	|gene |tRNA note= GO_component: cytosol [goid 0005829] [evidence NAS] |gene |CDS[fcd=-674](+,347877,349382) note= Ybr056wp;	|gene gene= LEU5 |CDS(+,108807,109880) gene= LEU5 note= Leu5p; |gene |CDS(-,110023,111312) note= Yhr003cp;	CGGAGGAGCTACTAAAGAAAGAGTGCTGCAATTAATACAATTAATATAAGTGTGGTTATTGAAAATAACTATTCATTTATACGGAGGGTTGGCCGAGTGGTCTAAGGCGGCAGACTTAAGATCTGTTGGACGGTTGTCCGCGCGAGTTCGAACCTCGCATCCTTCAGTAATATTTTTTTAATATACATTTTCTCTGCCATCATGGCTTAAAAAATGCTTAAAAGAAGGGAATTAGGGGGGATGGATGAACTAAGACATAACTTTCTTTTCTTCAATTCGAACTCTGTTGGGAAGAGTTGCTTTAAAAAAGACTCTCTATCCATCTATAAAATTTATTAAAACTTTTGAACTGCACAGAATGATTGGCTCACTTAGAAACAAATTTGAGCATTTCAAAGT…	CGGAAGAAAAGACCAAATAATATTATAATTAATATTTAAAACCCTTGAAAGATCATCTCTTAAAATAACCTCAAATAGTGTAAATCCAAGCACTTGAAAACTTTGCCGTTTTAGAACTCGTTAAATCCTTTAAGAAGGACATAACAGCCAGAGTAACAAAATAGTTTGCTCGTGAAAGCACCAGTGAAATTTCTCGAGGTAACTGCTAAAATAAACACAGTTCTTAAGTATGACGCGAGATAGCCCAGATTCTAACGACAGCTATAAGCATATAAACAAGAATACTACACAAAAAACCTCGTTTGATAGAAATTCATTCGATTATATTGTACGATCGGGATTAGCTGGAGGTATATCAGGTTCATGTGCGAAAACACTAATCGCACCCTTAGATAGAAT…
721	4618	0	0	15	15	NC_001134	347518	349584	NC_001139	240003	241499	|gene |tRNA note= GO_component: cytosol [goid 0005829] [evidence NAS] |gene |CDS[fcd=-674](+,347877,349382) note= Ybr056wp;	|gene gene= HUL5 |CDS(+,238358,241090) gene= HUL5 note= Hul5p; |gene |CDS(-,241358,245017) note= Ygl140cp;	CGGAGGAGCTACTAAAGAAAGAGTGCTGCAATTAATACAATTAATATAAGTGTGGTTATTGAAAATAACTATTCATTTATACGGAGGGTTGGCCGAGTGGTCTAAGGCGGCAGACTTAAGATCTGTTGGACGGTTGTCCGCGCGAGTTCGAACCTCGCATCCTTCAGTAATATTTTTTTAATATACATTTTCTCTGCCATCATGGCTTAAAAAATGCTTAAAAGAAGGGAATTAGGGGGGATGGATGAACTAAGACATAACTTTCTTTTCTTCAATTCGAACTCTGTTGGGAAGAGTTGCTTTAAAAAAGACTCTCTATCCATCTATAAAATTTATTAAAACTTTTGAACTGCACAGAATGATTGGCTCACTTAGAAACAAATTTGAGCATTTCAAAGT…	CGGTATGAGGAAGCAATCCGCTATCATCTCTAGGGATAATGTCTTAGAAGATGCTTTCAACGCATTTAACTCTATAGGAGAAAGGTTCAAAGCTTCATTAGATGTTACTTTTATTAATGAATTTGGTGAAGAAGCTGGTATTGATGGGGGCGGCATTACCAAGGAATTTTTAACTACTGTGTCTGATGAAGGATTTAAAGATCCAAAGCACGAGTTATTTCGGACGAATGATCGCTACGAATTATATCCTTCTGTTGTTTATGACGCTACGAAACTTAAGTATATATGGTTTCTGGGAAAGGTTGTAGGCAAATGTCTATATGAGCATGTTTTGATAGATGTATCTTTTGCTGATTTCTTTTTGAAAAAATTATTGAATTACTCGAACGGGTTTTTATC…
721	5246	0	0	1	1	NC_001134	347518	349584	NC_001139	798801	798859	|gene |tRNA note= GO_component: cytosol [goid 0005829] [evidence NAS] |gene |CDS[fcd=-674](+,347877,349382) note= Ybr056wp;	|gene gene= CYS4 note= synonyms: VMA41, STR4, NHS5 |CDS[fcd=-282](+,798548,800071) gene= CYS4 note= Cys4p;	CGGAGGAGCTACTAAAGAAAGAGTGCTGCAATTAATACAATTAATATAAGTGTGGTTATTGAAAATAACTATTCATTTATACGGAGGGTTGGCCGAGTGGTCTAAGGCGGCAGACTTAAGATCTGTTGGACGGTTGTCCGCGCGAGTTCGAACCTCGCATCCTTCAGTAATATTTTTTTAATATACATTTTCTCTGCCATCATGGCTTAAAAAATGCTTAAAAGAAGGGAATTAGGGGGGATGGATGAACTAAGACATAACTTTCTTTTCTTCAATTCGAACTCTGTTGGGAAGAGTTGCTTTAAAAAAGACTCTCTATCCATCTATAAAATTTATTAAAACTTTTGAACTGCACAGAATGATTGGCTCACTTAGAAACAAATTTGAGCATTTCAAAGT…	CGGTATCGGTCTAGCTTTAATCGGCGCCATCAAAGGTTACAGAACTATCATCACCTTG
721	7398	0	0	50	50	NC_001134	347518	349584	NC_001142	622969	623165	|gene |tRNA note= GO_component: cytosol [goid 0005829] [evidence NAS] |gene |CDS[fcd=-674](+,347877,349382) note= Ybr056wp;	|gene gene= SOD1 note= synonym: CRS4 |CDS[fcd=-61](-,622542,623006) gene= SOD1 note= Sod1p;	CGGAGGAGCTACTAAAGAAAGAGTGCTGCAATTAATACAATTAATATAAGTGTGGTTATTGAAAATAACTATTCATTTATACGGAGGGTTGGCCGAGTGGTCTAAGGCGGCAGACTTAAGATCTGTTGGACGGTTGTCCGCGCGAGTTCGAACCTCGCATCCTTCAGTAATATTTTTTTAATATACATTTTCTCTGCCATCATGGCTTAAAAAATGCTTAAAAGAAGGGAATTAGGGGGGATGGATGAACTAAGACATAACTTTCTTTTCTTCAATTCGAACTCTGTTGGGAAGAGTTGCTTTAAAAAAGACTCTCTATCCATCTATAAAATTTATTAAAACTTTTGAACTGCACAGAATGATTGGCTCACTTAGAAACAAATTTGAGCATTTCAAAGT…	CGGCATCACCCTTTAACACTGCGACTGCTTGAACCATTATAAATTAATTATGTTTTATTTGTTTGCGCGATTGCTTTCTTGCCTGTTTTTCCGCAACATAGTTACAGCTAAACATTTGCCCAAAACCATCTTCTTATATATATATCTGCGATGGCGAGCCCAGCGGAAGGGATGTCCGCTTACTAATTCCGACACA
721	12404	0	0	9	9	NC_001134	347518	349584	NC_001147	711058	711500	|gene |tRNA note= GO_component: cytosol [goid 0005829] [evidence NAS] |gene |CDS[fcd=-674](+,347877,349382) note= Ybr056wp;	|gene gene= PEX27 |CDS[fcd=-832](+,710447,711577) gene= PEX27 note= Pex27p;	CGGAGGAGCTACTAAAGAAAGAGTGCTGCAATTAATACAATTAATATAAGTGTGGTTATTGAAAATAACTATTCATTTATACGGAGGGTTGGCCGAGTGGTCTAAGGCGGCAGACTTAAGATCTGTTGGACGGTTGTCCGCGCGAGTTCGAACCTCGCATCCTTCAGTAATATTTTTTTAATATACATTTTCTCTGCCATCATGGCTTAAAAAATGCTTAAAAGAAGGGAATTAGGGGGGATGGATGAACTAAGACATAACTTTCTTTTCTTCAATTCGAACTCTGTTGGGAAGAGTTGCTTTAAAAAAGACTCTCTATCCATCTATAAAATTTATTAAAACTTTTGAACTGCACAGAATGATTGGCTCACTTAGAAACAAATTTGAGCATTTCAAAGT…	CGGTTTTTCGACATTATTGAAGCTTTTTATAATTTGACAGATGAGTTGATACTGTTCCATAAGCTACAATCAATGTTTGGTAAAAAGAACACATCACATGCAAATACTAATAGACTAATGACATTCGTCAAAGAACAGCACTATATCTTATGGGAAGTTTTAAATATTCTTGCTATCAATAAAAACATTGAACAATGGCGACAGCTAATAAGAGATGAAATTTATTTAAGTATCTATAATACCAGTGGTAATGCAATAAAGGAATACGAGTTAAAGTACAAACTACCTACCAATGACAAAGTCAATTTGGAGTTACGGAAAAATAATATTACATTGGATTTTTATAAGATAATACTAAACTTATTGTCTAATCTAATTAATATTAAAGGTAAAAGGGAC…
721	4870	0	0	1	1	NC_001134	347518	349584	NC_001139	449944	449963	|gene |tRNA note= GO_component: cytosol [goid 0005829] [evidence NAS] |gene |CDS[fcd=-674](+,347877,349382) note= Ybr056wp;	|gene gene= PGD1 note= synonyms: MED3, HRS1 |CDS[fcd=9](-,448769,449962) gene= PGD1 note= Pgd1p;	CGGAGGAGCTACTAAAGAAAGAGTGCTGCAATTAATACAATTAATATAAGTGTGGTTATTGAAAATAACTATTCATTTATACGGAGGGTTGGCCGAGTGGTCTAAGGCGGCAGACTTAAGATCTGTTGGACGGTTGTCCGCGCGAGTTCGAACCTCGCATCCTTCAGTAATATTTTTTTAATATACATTTTCTCTGCCATCATGGCTTAAAAAATGCTTAAAAGAAGGGAATTAGGGGGGATGGATGAACTAAGACATAACTTTCTTTTCTTCAATTCGAACTCTGTTGGGAAGAGTTGCTTTAAAAAAGACTCTCTATCCATCTATAAAATTTATTAAAACTTTTGAACTGCACAGAATGATTGGCTCACTTAGAAACAAATTTGAGCATTTCAAAGT…	CGGTATAATCGAGTCCATT
721	10028	0	0	1	1	NC_001134	347518	349584	NC_001145	369736	369884	|gene |tRNA note= GO_component: cytosol [goid 0005829] [evidence NAS] |gene |CDS[fcd=-674](+,347877,349382) note= Ybr056wp;	|gene gene= ERB1 |CDS[fcd=706](-,368093,370516) gene= ERB1 note= Erb1p;	CGGAGGAGCTACTAAAGAAAGAGTGCTGCAATTAATACAATTAATATAAGTGTGGTTATTGAAAATAACTATTCATTTATACGGAGGGTTGGCCGAGTGGTCTAAGGCGGCAGACTTAAGATCTGTTGGACGGTTGTCCGCGCGAGTTCGAACCTCGCATCCTTCAGTAATATTTTTTTAATATACATTTTCTCTGCCATCATGGCTTAAAAAATGCTTAAAAGAAGGGAATTAGGGGGGATGGATGAACTAAGACATAACTTTCTTTTCTTCAATTCGAACTCTGTTGGGAAGAGTTGCTTTAAAAAAGACTCTCTATCCATCTATAAAATTTATTAAAACTTTTGAACTGCACAGAATGATTGGCTCACTTAGAAACAAATTTGAGCATTTCAAAGT…	CGGAACAGCAGTTAATGGCATCACTTCTTCGTGTCTCGTGAACCAATCGATTAACGGTTCGTATGGATTTATGCTATCATCAGTTTGTTCGTTCCTTTGGATTTTGGAAATAAGTTCTAATTCCTCTTTGGTTAAGTTCAAACTTGAA
721	1657	0	0	1	1	NC_001134	347518	349584	NC_001136	30590	30807	|gene |tRNA note= GO_component: cytosol [goid 0005829] [evidence NAS] |gene |CDS[fcd=-674](+,347877,349382) note= Ybr056wp;	|gene gene= LRC1 |CDS[fcd=-41](+,30657,31829) gene= LRC1 note= Lrc1p;	CGGAGGAGCTACTAAAGAAAGAGTGCTGCAATTAATACAATTAATATAAGTGTGGTTATTGAAAATAACTATTCATTTATACGGAGGGTTGGCCGAGTGGTCTAAGGCGGCAGACTTAAGATCTGTTGGACGGTTGTCCGCGCGAGTTCGAACCTCGCATCCTTCAGTAATATTTTTTTAATATACATTTTCTCTGCCATCATGGCTTAAAAAATGCTTAAAAGAAGGGAATTAGGGGGGATGGATGAACTAAGACATAACTTTCTTTTCTTCAATTCGAACTCTGTTGGGAAGAGTTGCTTTAAAAAAGACTCTCTATCCATCTATAAAATTTATTAAAACTTTTGAACTGCACAGAATGATTGGCTCACTTAGAAACAAATTTGAGCATTTCAAAGT…	CGGATAGGCATAAAATATGACTCGAGATAAGACCAACAAAGATAAGTACCTCGGTTTAGTTAAGCGATGTTAGGACTGAAAGGGTGTCTAACTATTCTTATTGGATACGTTATTGCTGTCTGTGCTTTGTTTTCCAGTAGGGGAAGAAATCCTTCATTAACTGATTGGGAAAAGTTAAAGGACCAGAAAATATCGGATATTGATAACTTTGGGTTGA
721	13371	0	0	5	5	NC_001134	347518	349584	NC_001148	497808	497872	|gene |tRNA note= GO_component: cytosol [goid 0005829] [evidence NAS] |gene |CDS[fcd=-674](+,347877,349382) note= Ybr056wp;	|neigh_up CDS[fcd=-2336](+,495504,497717) gene= SUV3 note= Suv3p; |neigh_down CDS[fcd=254](+,498094,499290) gene= ERG10 note= Erg10p;	CGGAGGAGCTACTAAAGAAAGAGTGCTGCAATTAATACAATTAATATAAGTGTGGTTATTGAAAATAACTATTCATTTATACGGAGGGTTGGCCGAGTGGTCTAAGGCGGCAGACTTAAGATCTGTTGGACGGTTGTCCGCGCGAGTTCGAACCTCGCATCCTTCAGTAATATTTTTTTAATATACATTTTCTCTGCCATCATGGCTTAAAAAATGCTTAAAAGAAGGGAATTAGGGGGGATGGATGAACTAAGACATAACTTTCTTTTCTTCAATTCGAACTCTGTTGGGAAGAGTTGCTTTAAAAAAGACTCTCTATCCATCTATAAAATTTATTAAAACTTTTGAACTGCACAGAATGATTGGCTCACTTAGAAACAAATTTGAGCATTTCAAAGT…	CGGGTTTATCGTTTCCTAACAGGCACGTCACTTATAACGAGGTGCCTGTCGTTTACCGCCCAAG
[truncated: 653 more rows]

## Sheet: Raw 721-Unknown
This spreadsheet contains the output from the Topography program, it lists all of the interactions which were detected for the wild type strain yPH499 and the yDP77 mutant except that it has been filtered so that it is in the format of "ColumnA: 4C Bait fragment - Column B: Unknown interaction partner". The data is split into two categories by the Topography program, either the 4C product sequenc…
		Counts/Interaction Frequency
[truncated: 496 more rows]

## Sheet: Adjacent and Self
This worksheet details only adjacent and self interactions.
[truncated: 17 more rows]

## Sheet: tRNA
This worksheet details interactions with tRNA containing fragments. Please see below, or readme tab for Glossary of terms.
[truncated: 31 more rows]

[truncated: 5 more sheets: YSCPLASM, Mito, rDNA, ARS, TEL]
