# Supplementary material for: tRNA Gene Identity Affects Nuclear Positioning
Source: PLoS One. 2011 Dec 19;6(12):e29267. doi: 10.1371/journal.pone.0029267 (PMC3242769; doi:10.1371/journal.pone.0029267)
Supplement: Data S2 — Comparison of interactions for wild-type and yDP84 strains. Topography v1.19 program output for the high throughput sequencing of the 4C PCR product. The complete data set is presented along with tabs in which interactions have been classified according to the feature present on the partner sequence (i.e. tRNA, autonomous replicating sequences [ARS], YSCPLASM [2 micron plasmid], ribosomal DNA, Telomeres). The read-me tab explains file specific variations and presents a diagram of the fragments that were analysed to determine the interaction patterns. (XLSX) [file pone.0029267.s007.xlsx]

## Sheet: Read_me
READ_ME
Circular Chromosome Conformation Capture (4C) has been performed on an MspI restriction fragment containing the tL(CAA)G3 (Chr VII 857,491 – 857,378 bp) in a wildtype S. cerevisiae strain (yPH499) and also a mutant (yDP84) which has had the tRNA replaced with a SUP4-1 gene. This spreadsheet contains the Topography v1.19 program output for the high throughput sequencing of the 4C PCR product. This…					The data in this file consists of comparisons of the yPH499 and yDP77 datasets. The unique data was able to be mapped to a single restriction fragment. The repetitive data consists of a combination of the unique data and also fragments that were mapped to more than one restriction fragment.
The bait fragment details are:	Bait fragment	Chromosome	start	stop
	5306	NC_001139	857273	857825
Read me: identical colours indicate that elements share at least one sequence. Therefore, unless sequences mapped to the unique end of the MspI fragment interactions could be due to mis-alignment and cannot be assigned to any one particular fragment rather only a fragment grouping to a particular gene family/repetitive unit. In order to generate these files in which the unique and repetitive and …
Glossary	Unique
	Uniquely mapping means that the 4C PCR product sequence tag aligned uniquely against the reference genome.
	Repetitive
	The data in the Repetitive column is from the "data combined; .datcomb" file meaning it contains 4C PCR product sequence tags which did not align uniquely against the reference genome and those that did. The difference between the unique and repetitive numbers is the actual number of interactions which mapped against repetitive elements.
	Adjacent
	Adjacent interactions arise when the MspI fragments adjacent to the 4C bait fragment are captured during the 4C methodology. These can arise for a number of reasons, chief among these is that the MspI sites flanking the Bait fragment are not cleaved during the restriction digestion step of the 4C protocol.
	Self
	Self interactions arise when the 4C bait MspI fragment circularises. This results in a 4C PCR which amplifies across the ligated MspI junction, which is sequenced is reported as the bait fragment interacting with the bait fragment (721-721).
	Fragment
	Fragment refers to an MspI segment. They are artbitarily numbered by artifically joining chromosomes 1 to 16 (and Mitochondrial genome, 2micron plasmid [YSCPLASM]) end to end and numbering (starting at 0) from the beginnning of chromosome 1. Crucially, MspI fragments can not span across chromosomes.
	Counts/Interaction Frequency
	The number of sequence tags which aligned to a particular MspI fragment. In the case of interactions which are mapped to repetitive elements, or align in more than one region fo the genomeIt is generally accepted that the interaction frequency will be split evenly between the
	Annotation
	Annotations are derived from GenBank files from NCBI and are automatically inserted by the Topography program.
	Corrected interaction counts
	These interaction frequencies have been corrected or normalised using the adjacent interaction data, that is, the number of sequences which were obtained that crossed into the adjacent MspI fragment. This is an indication of the amount of sequencing which was obtained for each sample and provides a figure to normalise against. The correction takes place in the "adjacent and self" tab.

## Sheet: yPH499-yDP84_dat_and_datcomb
This spreadsheet contains the output from the Topography program, it lists all of the interactions which were detected for the wildtype strain, yPH499, and the yDP84 mutant, each with the 5306 bait fragment. The data is split into two categories by the Topography program, either the 4C product sequence tag aligned uniquely upon the genome, or it aligned against a repetitive element. The column la…
		Counts/Interaction Frequency
Interacting fragments		yPH499		yDP84		Fragment 1 coordinates			Fragment 2 coordinates			Annotation		Sequence		Fragment 2
Fragment 1	Fragment 2	yPH499 unique	yPH499 repetitive	yDP84 unique	yDP84 repetitive	Chromosome	start	stop	Chromosome	start	stop	Fragment 1	Fragment 2	Fragment 1	Fragment 2	First 15bp	Last 15bp
20	5306	0	0	0	3	NC_001133	25724	25858	NC_001139	857273	857825	|gene gene= FLO9 |CDS[fcd=2178](-,24001,27969) gene= FLO9 note= Flo9p;	|gene note= GO_component: cytosol [goid 0005829] [evidence NAS] |neigh_up CDS[fcd=-1243](-,855269,856306) gene= RNR4 note= Rnr4p; |neigh_down CDS[fcd=743](+,858292,858609) gene= TIM13 note= Tim13p;	CGGTGACGGTGGTCATTTCAGTGGATGTAGAGGTAAAAGTGTCGTTCCATGGCTGAGTTGTAGTCATGGCAGTAGTGGCTGTTGTTGGTGTTCTGATGACAATGATGGTCTCATCAGTTGGCAAACCGTTGGTA	CGGTTCCCTTTCTTGCCTGAAATGCTCGTTCTAATGGAAAAAAAAAGAAATAAAGGTGGGCCTGCCCATTAGCAGGAAATTGGTACTTAATTATTGAAAAAAAAATTATTGGTTGCTAAGAGATTCGAACTCTTGCATCTTACGATACCTGAGTATTCCCACAGTTAACTGCGGTCAAGATATTTCTTGAATCAGGCGCCTTAGACCGCTCGGCCAAACAACCACTTATTTGTTGAAAGCGAGCGCGGTACAAGTAATGTTACCTCATCTGATATACAATAAAGGTGGAGCGCCAATATATACGCATTTGACTGTTCATAATTCATTGAATATAATTTATTCCTTGTTAGTACAAAAGGGTTAAACAGAAAAAGACGTGACGTTGTAACCGAGAGGATG…
22	5306	0	0	0	10	NC_001133	25994	26128	NC_001139	857273	857825	|gene gene= FLO9 |CDS[fcd=1908](-,24001,27969) gene= FLO9 note= Flo9p;	|gene note= GO_component: cytosol [goid 0005829] [evidence NAS] |neigh_up CDS[fcd=-1243](-,855269,856306) gene= RNR4 note= Rnr4p; |neigh_down CDS[fcd=743](+,858292,858609) gene= TIM13 note= Tim13p;	CGGTGACGGTGGTCATTTCAGTGGATGTAGAGGTAAAAGTGTCGTTCCATGGCTGAGTTGTAGTTATGGCAGTAGTGGCTGTTGTTGGTGTTCTGATGACAATGATGGTTTCATCAGTTGGCAAACCGTTGGTA	CGGTTCCCTTTCTTGCCTGAAATGCTCGTTCTAATGGAAAAAAAAAGAAATAAAGGTGGGCCTGCCCATTAGCAGGAAATTGGTACTTAATTATTGAAAAAAAAATTATTGGTTGCTAAGAGATTCGAACTCTTGCATCTTACGATACCTGAGTATTCCCACAGTTAACTGCGGTCAAGATATTTCTTGAATCAGGCGCCTTAGACCGCTCGGCCAAACAACCACTTATTTGTTGAAAGCGAGCGCGGTACAAGTAATGTTACCTCATCTGATATACAATAAAGGTGGAGCGCCAATATATACGCATTTGACTGTTCATAATTCATTGAATATAATTTATTCCTTGTTAGTACAAAAGGGTTAAACAGAAAAAGACGTGACGTTGTAACCGAGAGGATG…
23	5306	0	0	0	8	NC_001133	26129	26263	NC_001139	857273	857825	|gene gene= FLO9 |CDS[fcd=1773](-,24001,27969) gene= FLO9 note= Flo9p;	|gene note= GO_component: cytosol [goid 0005829] [evidence NAS] |neigh_up CDS[fcd=-1243](-,855269,856306) gene= RNR4 note= Rnr4p; |neigh_down CDS[fcd=743](+,858292,858609) gene= TIM13 note= Tim13p;	CGGTGACGGTGGTCATTTCAGTGGATGTAGAGGTAAAAGTGCTGTTCCATGGCTCAGTTGTAGTTATGGCAGTAGTGGCTGTTGTTGGTGTTCTGATGACAATGATGGTTTCATCAGTTGGCAAACCGTTGGTA	CGGTTCCCTTTCTTGCCTGAAATGCTCGTTCTAATGGAAAAAAAAAGAAATAAAGGTGGGCCTGCCCATTAGCAGGAAATTGGTACTTAATTATTGAAAAAAAAATTATTGGTTGCTAAGAGATTCGAACTCTTGCATCTTACGATACCTGAGTATTCCCACAGTTAACTGCGGTCAAGATATTTCTTGAATCAGGCGCCTTAGACCGCTCGGCCAAACAACCACTTATTTGTTGAAAGCGAGCGCGGTACAAGTAATGTTACCTCATCTGATATACAATAAAGGTGGAGCGCCAATATATACGCATTTGACTGTTCATAATTCATTGAATATAATTTATTCCTTGTTAGTACAAAAGGGTTAAACAGAAAAAGACGTGACGTTGTAACCGAGAGGATG…
24	5306	0	0	0	4	NC_001133	26264	26398	NC_001139	857273	857825	|gene gene= FLO9 |CDS[fcd=1638](-,24001,27969) gene= FLO9 note= Flo9p;	|gene note= GO_component: cytosol [goid 0005829] [evidence NAS] |neigh_up CDS[fcd=-1243](-,855269,856306) gene= RNR4 note= Rnr4p; |neigh_down CDS[fcd=743](+,858292,858609) gene= TIM13 note= Tim13p;	CGGTGACGGTGGTCATTTCAGTGGATGTAGAGGTAAAAGTGTCGTTCCATGGCTGAGTTGTAGTCATGGCAGTAGTGGCTGTTGTTGGTGTTCTGATGACAATGATGGTCTCATCAGTTGGCAAACCATTGGTA	CGGTTCCCTTTCTTGCCTGAAATGCTCGTTCTAATGGAAAAAAAAAGAAATAAAGGTGGGCCTGCCCATTAGCAGGAAATTGGTACTTAATTATTGAAAAAAAAATTATTGGTTGCTAAGAGATTCGAACTCTTGCATCTTACGATACCTGAGTATTCCCACAGTTAACTGCGGTCAAGATATTTCTTGAATCAGGCGCCTTAGACCGCTCGGCCAAACAACCACTTATTTGTTGAAAGCGAGCGCGGTACAAGTAATGTTACCTCATCTGATATACAATAAAGGTGGAGCGCCAATATATACGCATTTGACTGTTCATAATTCATTGAATATAATTTATTCCTTGTTAGTACAAAAGGGTTAAACAGAAAAAGACGTGACGTTGTAACCGAGAGGATG…
27	5306	0	0	0	1	NC_001133	26669	26803	NC_001139	857273	857825	|gene gene= FLO9 |CDS[fcd=1233](-,24001,27969) gene= FLO9 note= Flo9p;	|gene note= GO_component: cytosol [goid 0005829] [evidence NAS] |neigh_up CDS[fcd=-1243](-,855269,856306) gene= RNR4 note= Rnr4p; |neigh_down CDS[fcd=743](+,858292,858609) gene= TIM13 note= Tim13p;	CGGTGACTGTGGTCAATTCGGTAGAAGTAGAGGTAAAAGTGTCGTTCCATGGCTGAGTTGTAGTCATGGCAGTAGTGGCTGTTGTTGGTGTTCTGATGACAATGATGGTCTCATCAGTTGGCAAACCATTGGTA	CGGTTCCCTTTCTTGCCTGAAATGCTCGTTCTAATGGAAAAAAAAAGAAATAAAGGTGGGCCTGCCCATTAGCAGGAAATTGGTACTTAATTATTGAAAAAAAAATTATTGGTTGCTAAGAGATTCGAACTCTTGCATCTTACGATACCTGAGTATTCCCACAGTTAACTGCGGTCAAGATATTTCTTGAATCAGGCGCCTTAGACCGCTCGGCCAAACAACCACTTATTTGTTGAAAGCGAGCGCGGTACAAGTAATGTTACCTCATCTGATATACAATAAAGGTGGAGCGCCAATATATACGCATTTGACTGTTCATAATTCATTGAATATAATTTATTCCTTGTTAGTACAAAAGGGTTAAACAGAAAAAGACGTGACGTTGTAACCGAGAGGATG…
29	5306	0	0	0	1	NC_001133	27074	27115	NC_001139	857273	857825	|gene gene= FLO9 |CDS[fcd=875](-,24001,27969) gene= FLO9 note= Flo9p;	|gene note= GO_component: cytosol [goid 0005829] [evidence NAS] |neigh_up CDS[fcd=-1243](-,855269,856306) gene= RNR4 note= Rnr4p; |neigh_down CDS[fcd=743](+,858292,858609) gene= TIM13 note= Tim13p;	CGGTGACGGTGGTCATTTCAGTAGATGTAGAAGTGAAAGTA	CGGTTCCCTTTCTTGCCTGAAATGCTCGTTCTAATGGAAAAAAAAAGAAATAAAGGTGGGCCTGCCCATTAGCAGGAAATTGGTACTTAATTATTGAAAAAAAAATTATTGGTTGCTAAGAGATTCGAACTCTTGCATCTTACGATACCTGAGTATTCCCACAGTTAACTGCGGTCAAGATATTTCTTGAATCAGGCGCCTTAGACCGCTCGGCCAAACAACCACTTATTTGTTGAAAGCGAGCGCGGTACAAGTAATGTTACCTCATCTGATATACAATAAAGGTGGAGCGCCAATATATACGCATTTGACTGTTCATAATTCATTGAATATAATTTATTCCTTGTTAGTACAAAAGGGTTAAACAGAAAAAGACGTGACGTTGTAACCGAGAGGATG…
75	5306	0	0	11	11	NC_001133	57456	57688	NC_001139	857273	857825	|gene |CDS[fcd=-53](+,57519,57851) note= Yal044w-ap;	|gene note= GO_component: cytosol [goid 0005829] [evidence NAS] |neigh_up CDS[fcd=-1243](-,855269,856306) gene= RNR4 note= Rnr4p; |neigh_down CDS[fcd=743](+,858292,858609) gene= TIM13 note= Tim13p;	CGGAATGACGAATCAAAAAGAGAATAGCATCGTTAGCAGCAAACGAAAGTGGAAAGAGAATAATGTTCAAGAGAGCAATGAGCACAGATGGTCCCGTGGCACGTACCATCCTGAAGAGACTGGAATGCGGCTTTCCAGATTACAAGAACTTTGCGTTTGGCCTCTACAACGATTCTCACAAGCATAAGGGCCATGCTGGTGTACAGGGAAATGTCTCTGCTGAGACACATTT	CGGTTCCCTTTCTTGCCTGAAATGCTCGTTCTAATGGAAAAAAAAAGAAATAAAGGTGGGCCTGCCCATTAGCAGGAAATTGGTACTTAATTATTGAAAAAAAAATTATTGGTTGCTAAGAGATTCGAACTCTTGCATCTTACGATACCTGAGTATTCCCACAGTTAACTGCGGTCAAGATATTTCTTGAATCAGGCGCCTTAGACCGCTCGGCCAAACAACCACTTATTTGTTGAAAGCGAGCGCGGTACAAGTAATGTTACCTCATCTGATATACAATAAAGGTGGAGCGCCAATATATACGCATTTGACTGTTCATAATTCATTGAATATAATTTATTCCTTGTTAGTACAAAAGGGTTAAACAGAAAAAGACGTGACGTTGTAACCGAGAGGATG…
238	5306	1	1	0	0	NC_001133	195629	196231	NC_001139	857273	857825	|gene gene= SWH1 note= synonyms: OSH1, YAR044W |CDS[fcd=-3317](+,192613,196179) gene= SWH1 note= Swh1p;	|gene note= GO_component: cytosol [goid 0005829] [evidence NAS] |neigh_up CDS[fcd=-1243](-,855269,856306) gene= RNR4 note= Rnr4p; |neigh_down CDS[fcd=743](+,858292,858609) gene= TIM13 note= Tim13p;	CGGTGCATATGAAGTCAGAGGTGAAGTATTCAACAAGGACGATAAAAAATTATGGGTTCTTGGTGGGCATTGGAATGATTCCATTTACGGGAAAAAAGTAACTGCTAGAGGCGGAGAACTGACATTAGACAGAATAAAAACGGCAAATTCTGCCACGGGAGGACCAAAACTAGATGGGTCTAAGTTTCTGATATGGAAAGCAAATGAAAGGCCTTCAGTGCCATTTAATTTAACGTCGTTTGCATTGACTTTGAATGCTTTGCCACCCCACTTGATACCATATTTAGCACCCACAGATAGTCGTTTAAGGCCCGATCAAAGGGCTATGGAAAATGGTGAATACGATAAAGCTGCCGCGGAAAAGCATCGTGTTGAAGTAAAACAAAGGGCAGCAAAAAA…	CGGTTCCCTTTCTTGCCTGAAATGCTCGTTCTAATGGAAAAAAAAAGAAATAAAGGTGGGCCTGCCCATTAGCAGGAAATTGGTACTTAATTATTGAAAAAAAAATTATTGGTTGCTAAGAGATTCGAACTCTTGCATCTTACGATACCTGAGTATTCCCACAGTTAACTGCGGTCAAGATATTTCTTGAATCAGGCGCCTTAGACCGCTCGGCCAAACAACCACTTATTTGTTGAAAGCGAGCGCGGTACAAGTAATGTTACCTCATCTGATATACAATAAAGGTGGAGCGCCAATATATACGCATTTGACTGTTCATAATTCATTGAATATAATTTATTCCTTGTTAGTACAAAAGGGTTAAACAGAAAAAGACGTGACGTTGTAACCGAGAGGATG…
239	5306	0	0	1	1	NC_001133	196232	196382	NC_001139	857273	857825	|neigh_up CDS[fcd=-3694](+,192613,196179) gene= SWH1 note= Swh1p; |neigh_down CDS[fcd=7087](+,203394,208007) gene= FLO1 note= Flo1p;	|gene note= GO_component: cytosol [goid 0005829] [evidence NAS] |neigh_up CDS[fcd=-1243](-,855269,856306) gene= RNR4 note= Rnr4p; |neigh_down CDS[fcd=743](+,858292,858609) gene= TIM13 note= Tim13p;	CGGTACATCGGAAAACAGGATAGGACCTATTTAATTATATAGTATGAAGTATTCATAACTTCTTGAGGCATCAATACATCATATTCCATGAGCTGCGTGGCATTCATACTCATTGATTTAAAGGTTTTTTATTTTCATGGAAAAGATTAA	CGGTTCCCTTTCTTGCCTGAAATGCTCGTTCTAATGGAAAAAAAAAGAAATAAAGGTGGGCCTGCCCATTAGCAGGAAATTGGTACTTAATTATTGAAAAAAAAATTATTGGTTGCTAAGAGATTCGAACTCTTGCATCTTACGATACCTGAGTATTCCCACAGTTAACTGCGGTCAAGATATTTCTTGAATCAGGCGCCTTAGACCGCTCGGCCAAACAACCACTTATTTGTTGAAAGCGAGCGCGGTACAAGTAATGTTACCTCATCTGATATACAATAAAGGTGGAGCGCCAATATATACGCATTTGACTGTTCATAATTCATTGAATATAATTTATTCCTTGTTAGTACAAAAGGGTTAAACAGAAAAAGACGTGACGTTGTAACCGAGAGGATG…
249	5306	0	1	0	0	NC_001133	204556	204690	NC_001139	857273	857825	|gene gene= FLO1 note= synonyms: FLO4, FLO2 |CDS[fcd=-1229](+,203394,208007) gene= FLO1 note= Flo1p;	|gene note= GO_component: cytosol [goid 0005829] [evidence NAS] |neigh_up CDS[fcd=-1243](-,855269,856306) gene= RNR4 note= Rnr4p; |neigh_down CDS[fcd=743](+,858292,858609) gene= TIM13 note= Tim13p;	CGGTACCAATGGTTTGCCAACTGATGAGACCATCATTGTCATCAGAACACCAACAACAGCCACTACTGCCATGACTACAACTCAGCCATGGAACGACACTTTTACCTCTACTTCTACCGAATTGACCACAGTCA	CGGTTCCCTTTCTTGCCTGAAATGCTCGTTCTAATGGAAAAAAAAAGAAATAAAGGTGGGCCTGCCCATTAGCAGGAAATTGGTACTTAATTATTGAAAAAAAAATTATTGGTTGCTAAGAGATTCGAACTCTTGCATCTTACGATACCTGAGTATTCCCACAGTTAACTGCGGTCAAGATATTTCTTGAATCAGGCGCCTTAGACCGCTCGGCCAAACAACCACTTATTTGTTGAAAGCGAGCGCGGTACAAGTAATGTTACCTCATCTGATATACAATAAAGGTGGAGCGCCAATATATACGCATTTGACTGTTCATAATTCATTGAATATAATTTATTCCTTGTTAGTACAAAAGGGTTAAACAGAAAAAGACGTGACGTTGTAACCGAGAGGATG…
251	5306	0	0	0	2	NC_001133	204826	204960	NC_001139	857273	857825	|gene gene= FLO1 note= synonyms: FLO4, FLO2 |CDS[fcd=-1499](+,203394,208007) gene= FLO1 note= Flo1p;	|gene note= GO_component: cytosol [goid 0005829] [evidence NAS] |neigh_up CDS[fcd=-1243](-,855269,856306) gene= RNR4 note= Rnr4p; |neigh_down CDS[fcd=743](+,858292,858609) gene= TIM13 note= Tim13p;	CGGTACCAATGGTTTGCCAACTGATGAGACCATCATTGTCATCAGAACACCAACAACAGCCACTACTGCCATGACTACAACTCAGCCATGGAACGACACTTTTACCTCTACATCCACTGAAATCACCACCGTCA	CGGTTCCCTTTCTTGCCTGAAATGCTCGTTCTAATGGAAAAAAAAAGAAATAAAGGTGGGCCTGCCCATTAGCAGGAAATTGGTACTTAATTATTGAAAAAAAAATTATTGGTTGCTAAGAGATTCGAACTCTTGCATCTTACGATACCTGAGTATTCCCACAGTTAACTGCGGTCAAGATATTTCTTGAATCAGGCGCCTTAGACCGCTCGGCCAAACAACCACTTATTTGTTGAAAGCGAGCGCGGTACAAGTAATGTTACCTCATCTGATATACAATAAAGGTGGAGCGCCAATATATACGCATTTGACTGTTCATAATTCATTGAATATAATTTATTCCTTGTTAGTACAAAAGGGTTAAACAGAAAAAGACGTGACGTTGTAACCGAGAGGATG…
252	5306	0	1	0	2	NC_001133	204961	205095	NC_001139	857273	857825	|gene gene= FLO1 note= synonyms: FLO4, FLO2 |CDS[fcd=-1634](+,203394,208007) gene= FLO1 note= Flo1p;	|gene note= GO_component: cytosol [goid 0005829] [evidence NAS] |neigh_up CDS[fcd=-1243](-,855269,856306) gene= RNR4 note= Rnr4p; |neigh_down CDS[fcd=743](+,858292,858609) gene= TIM13 note= Tim13p;	CGGTACCAATGGTTTGCCAACTGATGAGACCATCATTGTCATCAGAACACCAACAACAGCCACTACTGCCATGACTACACCTCAGCCATGGAACGACACTTTTACCTCTACATCCACTGAAATGACCACCGTCA	CGGTTCCCTTTCTTGCCTGAAATGCTCGTTCTAATGGAAAAAAAAAGAAATAAAGGTGGGCCTGCCCATTAGCAGGAAATTGGTACTTAATTATTGAAAAAAAAATTATTGGTTGCTAAGAGATTCGAACTCTTGCATCTTACGATACCTGAGTATTCCCACAGTTAACTGCGGTCAAGATATTTCTTGAATCAGGCGCCTTAGACCGCTCGGCCAAACAACCACTTATTTGTTGAAAGCGAGCGCGGTACAAGTAATGTTACCTCATCTGATATACAATAAAGGTGGAGCGCCAATATATACGCATTTGACTGTTCATAATTCATTGAATATAATTTATTCCTTGTTAGTACAAAAGGGTTAAACAGAAAAAGACGTGACGTTGTAACCGAGAGGATG…
253	5306	0	0	0	5	NC_001133	205096	205230	NC_001139	857273	857825	|gene gene= FLO1 note= synonyms: FLO4, FLO2 |CDS[fcd=-1769](+,203394,208007) gene= FLO1 note= Flo1p;	|gene note= GO_component: cytosol [goid 0005829] [evidence NAS] |neigh_up CDS[fcd=-1243](-,855269,856306) gene= RNR4 note= Rnr4p; |neigh_down CDS[fcd=743](+,858292,858609) gene= TIM13 note= Tim13p;	CGGTACCAACGGTTTGCCAACTGATGAAACCATCATTGTCATCAGAACACCAACAACAGCCACTACTGCCATAACTACAACTGAGCCATGGAACAGCACTTTTACCTCTACATCCACTGAAATGACCACCGTCA	CGGTTCCCTTTCTTGCCTGAAATGCTCGTTCTAATGGAAAAAAAAAGAAATAAAGGTGGGCCTGCCCATTAGCAGGAAATTGGTACTTAATTATTGAAAAAAAAATTATTGGTTGCTAAGAGATTCGAACTCTTGCATCTTACGATACCTGAGTATTCCCACAGTTAACTGCGGTCAAGATATTTCTTGAATCAGGCGCCTTAGACCGCTCGGCCAAACAACCACTTATTTGTTGAAAGCGAGCGCGGTACAAGTAATGTTACCTCATCTGATATACAATAAAGGTGGAGCGCCAATATATACGCATTTGACTGTTCATAATTCATTGAATATAATTTATTCCTTGTTAGTACAAAAGGGTTAAACAGAAAAAGACGTGACGTTGTAACCGAGAGGATG…
254	5306	0	0	0	8	NC_001133	205231	205365	NC_001139	857273	857825	|gene gene= FLO1 note= synonyms: FLO4, FLO2 |CDS[fcd=-1904](+,203394,208007) gene= FLO1 note= Flo1p;	|gene note= GO_component: cytosol [goid 0005829] [evidence NAS] |neigh_up CDS[fcd=-1243](-,855269,856306) gene= RNR4 note= Rnr4p; |neigh_down CDS[fcd=743](+,858292,858609) gene= TIM13 note= Tim13p;	CGGTACCAACGGTTTGCCAACTGATGAAACCATCATTGTCATCAGAACACCAACAACAGCCACTACTGCCATAACTACAACTCAGCCATGGAACGACACTTTTACCTCTACATCCACTGAAATGACCACCGTCA	CGGTTCCCTTTCTTGCCTGAAATGCTCGTTCTAATGGAAAAAAAAAGAAATAAAGGTGGGCCTGCCCATTAGCAGGAAATTGGTACTTAATTATTGAAAAAAAAATTATTGGTTGCTAAGAGATTCGAACTCTTGCATCTTACGATACCTGAGTATTCCCACAGTTAACTGCGGTCAAGATATTTCTTGAATCAGGCGCCTTAGACCGCTCGGCCAAACAACCACTTATTTGTTGAAAGCGAGCGCGGTACAAGTAATGTTACCTCATCTGATATACAATAAAGGTGGAGCGCCAATATATACGCATTTGACTGTTCATAATTCATTGAATATAATTTATTCCTTGTTAGTACAAAAGGGTTAAACAGAAAAAGACGTGACGTTGTAACCGAGAGGATG…
255	5306	0	0	0	6	NC_001133	205366	205500	NC_001139	857273	857825	|gene gene= FLO1 note= synonyms: FLO4, FLO2 |CDS[fcd=-2039](+,203394,208007) gene= FLO1 note= Flo1p;	|gene note= GO_component: cytosol [goid 0005829] [evidence NAS] |neigh_up CDS[fcd=-1243](-,855269,856306) gene= RNR4 note= Rnr4p; |neigh_down CDS[fcd=743](+,858292,858609) gene= TIM13 note= Tim13p;	CGGTACCAACGGTTTGCCAACTGATGAAACCATCATTGTCATCAGAACACCAACAACAGCCACTACTGCCATGACTACAACTCAGCCATGGAACGACACTTTTACCTCTACATCCACTGAAATCACCACCGTCA	CGGTTCCCTTTCTTGCCTGAAATGCTCGTTCTAATGGAAAAAAAAAGAAATAAAGGTGGGCCTGCCCATTAGCAGGAAATTGGTACTTAATTATTGAAAAAAAAATTATTGGTTGCTAAGAGATTCGAACTCTTGCATCTTACGATACCTGAGTATTCCCACAGTTAACTGCGGTCAAGATATTTCTTGAATCAGGCGCCTTAGACCGCTCGGCCAAACAACCACTTATTTGTTGAAAGCGAGCGCGGTACAAGTAATGTTACCTCATCTGATATACAATAAAGGTGGAGCGCCAATATATACGCATTTGACTGTTCATAATTCATTGAATATAATTTATTCCTTGTTAGTACAAAAGGGTTAAACAGAAAAAGACGTGACGTTGTAACCGAGAGGATG…
389	5306	0	0	1	1	NC_001134	84145	84566	NC_001139	857273	857825	|gene gene= ILS1 |CDS(-,81041,84259) gene= ILS1 note= Ils1p; |gene gene= SSA3 note= synonym: YG106 |CDS(-,84497,86446) gene= SSA3 note= Ssa3p;	|gene note= GO_component: cytosol [goid 0005829] [evidence NAS] |neigh_up CDS[fcd=-1243](-,855269,856306) gene= RNR4 note= Rnr4p; |neigh_down CDS[fcd=743](+,858292,858609) gene= TIM13 note= Tim13p;	CGGTTTGTCTTTTGTTAATTCTAATGAAGTATGAAAGGCATCTATTTCATCCCAAAGAGATAGAACTTTTTCTTCCTCCTTTGGAAATGAGAAGTGTGCGTTACTCTCGGACATATTTCCTTGGTTTTTTGAAGCTTTTGGCTAAAGGTTGTAGGAAGTCGAGTAACATCACTCTAGTTTAAAGCGCAAAATGATATTTTTCATGCTTAAGAGTCATCATTGTTTCGAGATTTCTTGCGTGCTGCGGAAACAAAAAAAAAAAAAATTTTTCGTCATCATGGATAGATTACCCGCCATCGTATAAAAGGTTAAACATAAAAAGTAGCTAAATAGAACACTATAGAAGAATAATCAATCAACCTCTTCCACTGTTGGACCTGTATCTTCTCCACCTCCCGT…	CGGTTCCCTTTCTTGCCTGAAATGCTCGTTCTAATGGAAAAAAAAAGAAATAAAGGTGGGCCTGCCCATTAGCAGGAAATTGGTACTTAATTATTGAAAAAAAAATTATTGGTTGCTAAGAGATTCGAACTCTTGCATCTTACGATACCTGAGTATTCCCACAGTTAACTGCGGTCAAGATATTTCTTGAATCAGGCGCCTTAGACCGCTCGGCCAAACAACCACTTATTTGTTGAAAGCGAGCGCGGTACAAGTAATGTTACCTCATCTGATATACAATAAAGGTGGAGCGCCAATATATACGCATTTGACTGTTCATAATTCATTGAATATAATTTATTCCTTGTTAGTACAAAAGGGTTAAACAGAAAAAGACGTGACGTTGTAACCGAGAGGATG…
410	5306	0	0	1	1	NC_001134	93517	94971	NC_001139	857273	857825	|gene gene= UBP13 |CDS[fcd=1640](-,93641,95884) gene= UBP13 note= Ubp13p;	|gene note= GO_component: cytosol [goid 0005829] [evidence NAS] |neigh_up CDS[fcd=-1243](-,855269,856306) gene= RNR4 note= Rnr4p; |neigh_down CDS[fcd=743](+,858292,858609) gene= TIM13 note= Tim13p;	CGGTTTAAAAAAAGAAGATTAAAGATATTATATTTATGTAAGAATTAAATTAATACTGTCAGAGAAAAAATAGTTTTAAAGGAGACGGTGAACCTTTACCTTCCCTTGATATGCAAATATTTTTCAGCTTTTCCTAAAACTAAACATTCTCGACTTTTTTTTAGAAGACTTTATGGGTGTGTTAGAAACAAAGCTGTCGTCTATAGCAGTATCCAAATCGTCTGCTATAGGCAGCTCTTCCTTTTTCTTTTGACCACTATTGCAAGTTCTTAGCCAATCATCGTACTTGATTAGATTGTCTATATTATCATCTTGTTCTTTTGCCATATTTTCACGATCATTCTTTTCAACAGCGTTTGAATACATCGCTTTATAAAACAAAACATATGCTGTTGCCAT…	CGGTTCCCTTTCTTGCCTGAAATGCTCGTTCTAATGGAAAAAAAAAGAAATAAAGGTGGGCCTGCCCATTAGCAGGAAATTGGTACTTAATTATTGAAAAAAAAATTATTGGTTGCTAAGAGATTCGAACTCTTGCATCTTACGATACCTGAGTATTCCCACAGTTAACTGCGGTCAAGATATTTCTTGAATCAGGCGCCTTAGACCGCTCGGCCAAACAACCACTTATTTGTTGAAAGCGAGCGCGGTACAAGTAATGTTACCTCATCTGATATACAATAAAGGTGGAGCGCCAATATATACGCATTTGACTGTTCATAATTCATTGAATATAATTTATTCCTTGTTAGTACAAAAGGGTTAAACAGAAAAAGACGTGACGTTGTAACCGAGAGGATG…
420	5306	0	0	3	3	NC_001134	101266	101299	NC_001139	857273	857825	|neigh_up CDS[fcd=-124](-,100373,101158) gene= PRX1 note= Prx1p; |neigh_down CDS[fcd=606](+,101888,105223) gene= KIP1 note= Kip1p;	|gene note= GO_component: cytosol [goid 0005829] [evidence NAS] |neigh_up CDS[fcd=-1243](-,855269,856306) gene= RNR4 note= Rnr4p; |neigh_down CDS[fcd=743](+,858292,858609) gene= TIM13 note= Tim13p;	CGGCCCCTTGTTTCTTTACGTAATTAAAAATCT	CGGTTCCCTTTCTTGCCTGAAATGCTCGTTCTAATGGAAAAAAAAAGAAATAAAGGTGGGCCTGCCCATTAGCAGGAAATTGGTACTTAATTATTGAAAAAAAAATTATTGGTTGCTAAGAGATTCGAACTCTTGCATCTTACGATACCTGAGTATTCCCACAGTTAACTGCGGTCAAGATATTTCTTGAATCAGGCGCCTTAGACCGCTCGGCCAAACAACCACTTATTTGTTGAAAGCGAGCGCGGTACAAGTAATGTTACCTCATCTGATATACAATAAAGGTGGAGCGCCAATATATACGCATTTGACTGTTCATAATTCATTGAATATAATTTATTCCTTGTTAGTACAAAAGGGTTAAACAGAAAAAGACGTGACGTTGTAACCGAGAGGATG…
479	5306	0	0	3	3	NC_001134	151358	151655	NC_001139	857273	857825	|gene gene= POL12 |CDS[fcd=2107](-,151496,153613) gene= POL12 note= Pol12p;	|gene note= GO_component: cytosol [goid 0005829] [evidence NAS] |neigh_up CDS[fcd=-1243](-,855269,856306) gene= RNR4 note= Rnr4p; |neigh_down CDS[fcd=743](+,858292,858609) gene= TIM13 note= Tim13p;	CGGATACTGATCATGTTATGGTCTTTAATCAATAAGTAAGTTATAGAGCCAGTTTCAAGGTCGATAGTTCAGGTGTATAACAATACTTTTTGGTGCTACCTTGAGCTATTCCATTAGTTAAGTTTGAATTAAATATATCAACTAGCAATCAAGTCAACTCTAGCGCGCTTCCACACGTTGTGTAGATAAACTGGCTCTTCACCTTCAACAAGCGTCAATTTCCCGTCTTCAAGATCAGGGCATTGGACAGTAATTTGTGCATAGGATCCCCTGTTACCTGTTGCTCTAATAAATCTT	CGGTTCCCTTTCTTGCCTGAAATGCTCGTTCTAATGGAAAAAAAAAGAAATAAAGGTGGGCCTGCCCATTAGCAGGAAATTGGTACTTAATTATTGAAAAAAAAATTATTGGTTGCTAAGAGATTCGAACTCTTGCATCTTACGATACCTGAGTATTCCCACAGTTAACTGCGGTCAAGATATTTCTTGAATCAGGCGCCTTAGACCGCTCGGCCAAACAACCACTTATTTGTTGAAAGCGAGCGCGGTACAAGTAATGTTACCTCATCTGATATACAATAAAGGTGGAGCGCCAATATATACGCATTTGACTGTTCATAATTCATTGAATATAATTTATTCCTTGTTAGTACAAAAGGGTTAAACAGAAAAAGACGTGACGTTGTAACCGAGAGGATG…
498	5306	0	0	0	1	NC_001134	163615	164612	NC_001139	857273	857825	|gene gene= PET9 note= synonyms: ANC2, AAC2 |CDS(-,163044,164000) gene= PET9 note= Pet9p; |gene |CDS(-,164491,164775) note= Ybl029c-ap;	|gene note= GO_component: cytosol [goid 0005829] [evidence NAS] |neigh_up CDS[fcd=-1243](-,855269,856306) gene= RNR4 note= Rnr4p; |neigh_down CDS[fcd=743](+,858292,858609) gene= TIM13 note= Tim13p;	CGGCAAACCATTTGGCGTAACCTTCTTCCTTCTTGAAACCAAACATGGCCTTGATCTTGTCCTTGAAGGCGAAATTCAAAGCTTGAGTGGGGAAATAACGGATAACGTTAGCAGTGTTACCTCTCCAGAATGAGATAACACCTTCCTGTGTAGCGGTTCTCTTGAAACAGTCTAAGATACCTGCGTATTTTCTGTCCAAAGTACCTTGTTTTAACATTTCATCTTGGTTTTGGATCAAAAGTTTAACTCTTTCGATGGGAGATGCAGCAGTTTTGGCGACAGCGGCACTGACACCACCCATTAAGAAATCAATCAAAAAGTTAGATTCCTTCTTTGGAGCTGGGGCTGGAGGTAATGGGGTTTTGACTTGGGCGTTGGAAGACATGGCTATTTGCTTAT…	CGGTTCCCTTTCTTGCCTGAAATGCTCGTTCTAATGGAAAAAAAAAGAAATAAAGGTGGGCCTGCCCATTAGCAGGAAATTGGTACTTAATTATTGAAAAAAAAATTATTGGTTGCTAAGAGATTCGAACTCTTGCATCTTACGATACCTGAGTATTCCCACAGTTAACTGCGGTCAAGATATTTCTTGAATCAGGCGCCTTAGACCGCTCGGCCAAACAACCACTTATTTGTTGAAAGCGAGCGCGGTACAAGTAATGTTACCTCATCTGATATACAATAAAGGTGGAGCGCCAATATATACGCATTTGACTGTTCATAATTCATTGAATATAATTTATTCCTTGTTAGTACAAAAGGGTTAAACAGAAAAAGACGTGACGTTGTAACCGAGAGGATG…
506	5306	0	0	2	2	NC_001134	168544	170155	NC_001139	857273	857825	|gene gene= RPL19B gene= RPL19B note= Rpl19bp; |rep_origin note= ARS207 |neigh_up CDS[fcd=-1508](-,167521,167841) note= Ybl028cp; |neigh_down CDS[fcd=2135](+,171484,171921) gene= RRN10 note= Rrn10p;	|gene note= GO_component: cytosol [goid 0005829] [evidence NAS] |neigh_up CDS[fcd=-1243](-,855269,856306) gene= RNR4 note= Rnr4p; |neigh_down CDS[fcd=743](+,858292,858609) gene= TIM13 note= Tim13p;	CGGTGGTCGCATAGTTGGTAGCAACATCCATAGAAGAACCTCAGATAAATTTCAAGCTTGTACGAATTGCCGCGTTTATTACAAACTATAGAATTATCGCAGCAATGGTACGTGTCTGTTCCTGCAAGCGTTAATTCGATTGATAGATAAAGTAATTCATTAACCTTTGCGAATATGCTCTTTACTGTTAGGTTTCAGGATTTTAAAAATGAAGCAACTTTACTAACATCAATATGCAAATAAATCTGCAAAAACTTTTTTTCACAGGGCTAACTTGCGTACTCAAAAGAGACTTGCCGCTTCTGTTGTCGGTGTTGGTAAGAGAAAGGTTTGGTTAGACCCAAACGAAACTTCTGAAATTGCCCAAGCCAACTCTAGAAATGCCATTAGAAAATTGGT…	CGGTTCCCTTTCTTGCCTGAAATGCTCGTTCTAATGGAAAAAAAAAGAAATAAAGGTGGGCCTGCCCATTAGCAGGAAATTGGTACTTAATTATTGAAAAAAAAATTATTGGTTGCTAAGAGATTCGAACTCTTGCATCTTACGATACCTGAGTATTCCCACAGTTAACTGCGGTCAAGATATTTCTTGAATCAGGCGCCTTAGACCGCTCGGCCAAACAACCACTTATTTGTTGAAAGCGAGCGCGGTACAAGTAATGTTACCTCATCTGATATACAATAAAGGTGGAGCGCCAATATATACGCATTTGACTGTTCATAATTCATTGAATATAATTTATTCCTTGTTAGTACAAAAGGGTTAAACAGAAAAAGACGTGACGTTGTAACCGAGAGGATG…
513	5306	226	226	0	0	NC_001134	176247	176345	NC_001139	857273	857825	|gene gene= MCM2 |CDS[fcd=1233](-,174923,177529) gene= MCM2 note= Mcm2p;	|gene note= GO_component: cytosol [goid 0005829] [evidence NAS] |neigh_up CDS[fcd=-1243](-,855269,856306) gene= RNR4 note= Rnr4p; |neigh_down CDS[fcd=743](+,858292,858609) gene= TIM13 note= Tim13p;	CGGTAACTTCTACCTCTTCACCTGGCTTGGATACATCTACCAAATCCGCCAACAAAATGACTTCTCTATGTCTTGGTAGACGGCCTGGAGGAACGGTT	CGGTTCCCTTTCTTGCCTGAAATGCTCGTTCTAATGGAAAAAAAAAGAAATAAAGGTGGGCCTGCCCATTAGCAGGAAATTGGTACTTAATTATTGAAAAAAAAATTATTGGTTGCTAAGAGATTCGAACTCTTGCATCTTACGATACCTGAGTATTCCCACAGTTAACTGCGGTCAAGATATTTCTTGAATCAGGCGCCTTAGACCGCTCGGCCAAACAACCACTTATTTGTTGAAAGCGAGCGCGGTACAAGTAATGTTACCTCATCTGATATACAATAAAGGTGGAGCGCCAATATATACGCATTTGACTGTTCATAATTCATTGAATATAATTTATTCCTTGTTAGTACAAAAGGGTTAAACAGAAAAAGACGTGACGTTGTAACCGAGAGGATG…
523	5306	87	87	1	1	NC_001134	185033	185153	NC_001139	857273	857825	|gene gene= APN2 note= synonym: ETH1 |CDS[fcd=-737](+,184356,185918) gene= APN2 note= Apn2p;	|gene note= GO_component: cytosol [goid 0005829] [evidence NAS] |neigh_up CDS[fcd=-1243](-,855269,856306) gene= RNR4 note= Rnr4p; |neigh_down CDS[fcd=743](+,858292,858609) gene= TIM13 note= Tim13p;	CGGGATCTTATAGACAGTGCCGATACATTAGAACAATTCTCAATTCCAATAACAGATCCCATGGGTGGAACAAAGTTAGAAGCACAATATAGGGATAAAGCAATCCAATTTATTATCAAT	CGGTTCCCTTTCTTGCCTGAAATGCTCGTTCTAATGGAAAAAAAAAGAAATAAAGGTGGGCCTGCCCATTAGCAGGAAATTGGTACTTAATTATTGAAAAAAAAATTATTGGTTGCTAAGAGATTCGAACTCTTGCATCTTACGATACCTGAGTATTCCCACAGTTAACTGCGGTCAAGATATTTCTTGAATCAGGCGCCTTAGACCGCTCGGCCAAACAACCACTTATTTGTTGAAAGCGAGCGCGGTACAAGTAATGTTACCTCATCTGATATACAATAAAGGTGGAGCGCCAATATATACGCATTTGACTGTTCATAATTCATTGAATATAATTTATTCCTTGTTAGTACAAAAGGGTTAAACAGAAAAAGACGTGACGTTGTAACCGAGAGGATG…
524	5306	0	0	22	22	NC_001134	185154	185393	NC_001139	857273	857825	|gene gene= APN2 note= synonym: ETH1 |CDS[fcd=-917](+,184356,185918) gene= APN2 note= Apn2p;	|gene note= GO_component: cytosol [goid 0005829] [evidence NAS] |neigh_up CDS[fcd=-1243](-,855269,856306) gene= RNR4 note= Rnr4p; |neigh_down CDS[fcd=743](+,858292,858609) gene= TIM13 note= Tim13p;	CGGACACGCCACATCGGAGGATATTTAATCAAATATTGGCTGATTCACTTTTACCAGACGCGAGTAAAAGGGGGATACTGATAGACACTACGAGGCTAATTCAAACAAGAAATCGACTTAAAATGTATACAGTCTGGAATATGTTAAAAAATTTAAGACCTTCGAATTATGGCTCACGGATAGATTTTATCCTAGTGTCCTTAAAGCTTGAACGATGCATAAAAGCAGCTGACATTCTT	CGGTTCCCTTTCTTGCCTGAAATGCTCGTTCTAATGGAAAAAAAAAGAAATAAAGGTGGGCCTGCCCATTAGCAGGAAATTGGTACTTAATTATTGAAAAAAAAATTATTGGTTGCTAAGAGATTCGAACTCTTGCATCTTACGATACCTGAGTATTCCCACAGTTAACTGCGGTCAAGATATTTCTTGAATCAGGCGCCTTAGACCGCTCGGCCAAACAACCACTTATTTGTTGAAAGCGAGCGCGGTACAAGTAATGTTACCTCATCTGATATACAATAAAGGTGGAGCGCCAATATATACGCATTTGACTGTTCATAATTCATTGAATATAATTTATTCCTTGTTAGTACAAAAGGGTTAAACAGAAAAAGACGTGACGTTGTAACCGAGAGGATG…
543	5306	0	0	0	1	NC_001134	197652	197824	NC_001139	857273	857825	|gene |tRNA note= GO_component: cytosol [goid 0005829] [evidence NAS] |LTR note= YBLWSIGMA1 |neigh_up CDS[fcd=-3613](+,194125,195705) gene= ACH1 note= Ach1p; |neigh_down CDS[fcd=4013](-,199067,201751) gene= RRN6 note= Rrn6p;	|gene note= GO_component: cytosol [goid 0005829] [evidence NAS] |neigh_up CDS[fcd=-1243](-,855269,856306) gene= RNR4 note= Rnr4p; |neigh_down CDS[fcd=743](+,858292,858609) gene= TIM13 note= Tim13p;	CGGGGGCCCAACGATGGCAACGTTGGATTTTACCACTAAACCACTTGCGCTTATTTCTTGGAAGTGTTGTATCTCAAAATGAGATACGTCAGTATGACAATACGTCATCCTGAACGTTCATAAAACACATATGAAACAACCTTATAACAAAACGAACAACATGAGATAAAAC	CGGTTCCCTTTCTTGCCTGAAATGCTCGTTCTAATGGAAAAAAAAAGAAATAAAGGTGGGCCTGCCCATTAGCAGGAAATTGGTACTTAATTATTGAAAAAAAAATTATTGGTTGCTAAGAGATTCGAACTCTTGCATCTTACGATACCTGAGTATTCCCACAGTTAACTGCGGTCAAGATATTTCTTGAATCAGGCGCCTTAGACCGCTCGGCCAAACAACCACTTATTTGTTGAAAGCGAGCGCGGTACAAGTAATGTTACCTCATCTGATATACAATAAAGGTGGAGCGCCAATATATACGCATTTGACTGTTCATAATTCATTGAATATAATTTATTCCTTGTTAGTACAAAAGGGTTAAACAGAAAAAGACGTGACGTTGTAACCGAGAGGATG…
596	5306	0	0	23	23	NC_001134	243015	243644	NC_001139	857273	857825	|gene gene= COQ1 |CDS[fcd=-518](+,242811,244232) gene= COQ1 note= Coq1p;	|gene note= GO_component: cytosol [goid 0005829] [evidence NAS] |neigh_up CDS[fcd=-1243](-,855269,856306) gene= RNR4 note= Rnr4p; |neigh_down CDS[fcd=743](+,858292,858609) gene= TIM13 note= Tim13p;	CGGTGCTAAACAAGGTTACTAGTTACTATTTTGAAACAGAAGGCAAAAAAGTACGTCCCTTGTTAGTGTTGTTGTTGTCAAGAGCACTTTCTGAAATTCCCATGACAGAAAGAAATCACTTGAAAATTGACAAGTCGGATGTTCCTGAGGACCCAATTTACTCTAAACCTAGTCAAAATCAACTATTTCAACGTCCTGCAAGTAGCATATCCCCACTACATATTCTTCACGGTATTAAACCACTAAATCCCTTGACAAAAGGTCCTGAGCCTTTGCCAGAAGAAACTTTTGACAAACAAAGAGGGATTTTACCCAAACAGAGAAGATTAGCAGAGATTGTAGAGATGATACACACTGCGTCTTTACTTCATGATGACGTTATTGATCATTCTGATACAA…	CGGTTCCCTTTCTTGCCTGAAATGCTCGTTCTAATGGAAAAAAAAAGAAATAAAGGTGGGCCTGCCCATTAGCAGGAAATTGGTACTTAATTATTGAAAAAAAAATTATTGGTTGCTAAGAGATTCGAACTCTTGCATCTTACGATACCTGAGTATTCCCACAGTTAACTGCGGTCAAGATATTTCTTGAATCAGGCGCCTTAGACCGCTCGGCCAAACAACCACTTATTTGTTGAAAGCGAGCGCGGTACAAGTAATGTTACCTCATCTGATATACAATAAAGGTGGAGCGCCAATATATACGCATTTGACTGTTCATAATTCATTGAATATAATTTATTCCTTGTTAGTACAAAAGGGTTAAACAGAAAAAGACGTGACGTTGTAACCGAGAGGATG…
679	5306	5	5	0	0	NC_001134	315411	315438	NC_001139	857273	857825	|neigh_up CDS[fcd=-3527](+,311897,314788) gene= CHS2 note= Chs2p; |neigh_down CDS[fcd=151](+,315575,316510) gene= ATP3 note= Atp3p;	|gene note= GO_component: cytosol [goid 0005829] [evidence NAS] |neigh_up CDS[fcd=-1243](-,855269,856306) gene= RNR4 note= Rnr4p; |neigh_down CDS[fcd=743](+,858292,858609) gene= TIM13 note= Tim13p;	CGGACCGCAATAACGATTAAAGAAGGC	CGGTTCCCTTTCTTGCCTGAAATGCTCGTTCTAATGGAAAAAAAAAGAAATAAAGGTGGGCCTGCCCATTAGCAGGAAATTGGTACTTAATTATTGAAAAAAAAATTATTGGTTGCTAAGAGATTCGAACTCTTGCATCTTACGATACCTGAGTATTCCCACAGTTAACTGCGGTCAAGATATTTCTTGAATCAGGCGCCTTAGACCGCTCGGCCAAACAACCACTTATTTGTTGAAAGCGAGCGCGGTACAAGTAATGTTACCTCATCTGATATACAATAAAGGTGGAGCGCCAATATATACGCATTTGACTGTTCATAATTCATTGAATATAATTTATTCCTTGTTAGTACAAAAGGGTTAAACAGAAAAAGACGTGACGTTGTAACCGAGAGGATG…
679	5305	1	1	0	0	NC_001134	315411	315438	NC_001139	856823	857272	|neigh_up CDS[fcd=-3527](+,311897,314788) gene= CHS2 note= Chs2p; |neigh_down CDS[fcd=151](+,315575,316510) gene= ATP3 note= Atp3p;	|neigh_up CDS[fcd=-741](-,855269,856306) gene= RNR4 note= Rnr4p; |neigh_down CDS[fcd=1245](+,858292,858609) gene= TIM13 note= Tim13p;	CGGACCGCAATAACGATTAAAGAAGGC	CGGTGCTTGGTGTTGGGTGGTCGTACCTGCTAGTTCCATTGGTGCGGTGTATGGGCGGGTACCCTCAAAAAGGGAAACGAAGGTAGGCGCACGGTGCTTATTAAGCTCAGAGGCGACCTCGCAGAAGGGGGCAGACCACACAAGCGGTGGAGGCGCTCCAGATATTCAGTGGAGTGGGGCTTGCTCATGTTCTGTTGTTGGTTTTGGATAGAAAAAGAGCGGGTTGAATAGTTTGCCATGGCAACCACTCTGGAAGCGAAATCACATAGACGCGTAAACACTCACACACAGGATATTCGTATAGCAAGGTACTAGTGGCGACACTCAGGTGGTCCTCGTTGCCTTATCTCCAGATTCCTCAATTTCTGTGAAACGTAAACATTATGGGAATAGTCTAGA…
694	5306	4	4	35	35	NC_001134	324425	324485	NC_001139	857273	857825	|gene gene= TCM62 |CDS[fcd=1603](-,324337,326058) gene= TCM62 note= Tcm62p;	|gene note= GO_component: cytosol [goid 0005829] [evidence NAS] |neigh_up CDS[fcd=-1243](-,855269,856306) gene= RNR4 note= Rnr4p; |neigh_down CDS[fcd=743](+,858292,858609) gene= TIM13 note= Tim13p;	CGGCTAAACAAGAATCCATTTTGCTCCATGGCTCCAAGTTTCCATCCTTTACTGTGTTCA	CGGTTCCCTTTCTTGCCTGAAATGCTCGTTCTAATGGAAAAAAAAAGAAATAAAGGTGGGCCTGCCCATTAGCAGGAAATTGGTACTTAATTATTGAAAAAAAAATTATTGGTTGCTAAGAGATTCGAACTCTTGCATCTTACGATACCTGAGTATTCCCACAGTTAACTGCGGTCAAGATATTTCTTGAATCAGGCGCCTTAGACCGCTCGGCCAAACAACCACTTATTTGTTGAAAGCGAGCGCGGTACAAGTAATGTTACCTCATCTGATATACAATAAAGGTGGAGCGCCAATATATACGCATTTGACTGTTCATAATTCATTGAATATAATTTATTCCTTGTTAGTACAAAAGGGTTAAACAGAAAAAGACGTGACGTTGTAACCGAGAGGATG…
719	5306	0	0	3	3	NC_001134	346852	346929	NC_001139	857273	857825	|gene gene= PRP6 note= synonyms: TSM7269, RNA6 |CDS[fcd=409](-,344600,347299) gene= PRP6 note= Prp6p;	|gene note= GO_component: cytosol [goid 0005829] [evidence NAS] |neigh_up CDS[fcd=-1243](-,855269,856306) gene= RNR4 note= Rnr4p; |neigh_down CDS[fcd=743](+,858292,858609) gene= TIM13 note= Tim13p;	CGGTGCAGCATAAGTTTTTCTGTTTAATTGCTCTTGAATTCTATTTCTCTTGTTTCTTCTTGTAAAATCTGTGGCAT	CGGTTCCCTTTCTTGCCTGAAATGCTCGTTCTAATGGAAAAAAAAAGAAATAAAGGTGGGCCTGCCCATTAGCAGGAAATTGGTACTTAATTATTGAAAAAAAAATTATTGGTTGCTAAGAGATTCGAACTCTTGCATCTTACGATACCTGAGTATTCCCACAGTTAACTGCGGTCAAGATATTTCTTGAATCAGGCGCCTTAGACCGCTCGGCCAAACAACCACTTATTTGTTGAAAGCGAGCGCGGTACAAGTAATGTTACCTCATCTGATATACAATAAAGGTGGAGCGCCAATATATACGCATTTGACTGTTCATAATTCATTGAATATAATTTATTCCTTGTTAGTACAAAAGGGTTAAACAGAAAAAGACGTGACGTTGTAACCGAGAGGATG…
720	721	1	1	0	0	NC_001134	346930	347517	NC_001134	347518	349584	|gene gene= PRP6 note= synonyms: TSM7269, RNA6 |CDS[fcd=76](-,344600,347299) gene= PRP6 note= Prp6p;	|gene |tRNA note= GO_component: cytosol [goid 0005829] [evidence NAS] |gene |CDS[fcd=-674](+,347877,349382) note= Ybr056wp;	CGGAATATCCATCCACTCACTCTCCGTTACAGCAGCTAATGATTCTTTCAAATCGGCAAATTGCCGTTTCACGTTTGAAGAATCAACTGAATTGTCATCATCCTTTTCATTAGCTCTTTTCTTTTTCTTTTGTGCTAATTTCAATTCAAGCGTTTTGAATACATTTGCAGCTTCATCATCTTCATCATCTTTCGGTTGGCTTTGAAGATGGTTGTTCAAATTTTCACGGTACCTTTTCGGTATTCTTCTTCCTTTGTCATCATTACTAACCACTTGCTTTTCTTTTGTTGAAAATCCAGTGGCTCCACGACCAATACCTGGTACGTAACCTGCAGGTGGTTCTTGATCCAAAAAAGATGGCCTCTCCATAAAATGTGACGTTTTCTTGCTGTTAAACTC…	CGGAGGAGCTACTAAAGAAAGAGTGCTGCAATTAATACAATTAATATAAGTGTGGTTATTGAAAATAACTATTCATTTATACGGAGGGTTGGCCGAGTGGTCTAAGGCGGCAGACTTAAGATCTGTTGGACGGTTGTCCGCGCGAGTTCGAACCTCGCATCCTTCAGTAATATTTTTTTAATATACATTTTCTCTGCCATCATGGCTTAAAAAATGCTTAAAAGAAGGGAATTAGGGGGGATGGATGAACTAAGACATAACTTTCTTTTCTTCAATTCGAACTCTGTTGGGAAGAGTTGCTTTAAAAAAGACTCTCTATCCATCTATAAAATTTATTAAAACTTTTGAACTGCACAGAATGATTGGCTCACTTAGAAACAAATTTGAGCATTTCAAAGT…
720	5306	3	3	10	10	NC_001134	346930	347517	NC_001139	857273	857825	|gene gene= PRP6 note= synonyms: TSM7269, RNA6 |CDS[fcd=76](-,344600,347299) gene= PRP6 note= Prp6p;	|gene note= GO_component: cytosol [goid 0005829] [evidence NAS] |neigh_up CDS[fcd=-1243](-,855269,856306) gene= RNR4 note= Rnr4p; |neigh_down CDS[fcd=743](+,858292,858609) gene= TIM13 note= Tim13p;	CGGAATATCCATCCACTCACTCTCCGTTACAGCAGCTAATGATTCTTTCAAATCGGCAAATTGCCGTTTCACGTTTGAAGAATCAACTGAATTGTCATCATCCTTTTCATTAGCTCTTTTCTTTTTCTTTTGTGCTAATTTCAATTCAAGCGTTTTGAATACATTTGCAGCTTCATCATCTTCATCATCTTTCGGTTGGCTTTGAAGATGGTTGTTCAAATTTTCACGGTACCTTTTCGGTATTCTTCTTCCTTTGTCATCATTACTAACCACTTGCTTTTCTTTTGTTGAAAATCCAGTGGCTCCACGACCAATACCTGGTACGTAACCTGCAGGTGGTTCTTGATCCAAAAAAGATGGCCTCTCCATAAAATGTGACGTTTTCTTGCTGTTAAACTC…	CGGTTCCCTTTCTTGCCTGAAATGCTCGTTCTAATGGAAAAAAAAAGAAATAAAGGTGGGCCTGCCCATTAGCAGGAAATTGGTACTTAATTATTGAAAAAAAAATTATTGGTTGCTAAGAGATTCGAACTCTTGCATCTTACGATACCTGAGTATTCCCACAGTTAACTGCGGTCAAGATATTTCTTGAATCAGGCGCCTTAGACCGCTCGGCCAAACAACCACTTATTTGTTGAAAGCGAGCGCGGTACAAGTAATGTTACCTCATCTGATATACAATAAAGGTGGAGCGCCAATATATACGCATTTGACTGTTCATAATTCATTGAATATAATTTATTCCTTGTTAGTACAAAAGGGTTAAACAGAAAAAGACGTGACGTTGTAACCGAGAGGATG…
720	4870	0	0	1	1	NC_001134	346930	347517	NC_001139	449944	449963	|gene gene= PRP6 note= synonyms: TSM7269, RNA6 |CDS[fcd=76](-,344600,347299) gene= PRP6 note= Prp6p;	|gene gene= PGD1 note= synonyms: MED3, HRS1 |CDS[fcd=9](-,448769,449962) gene= PGD1 note= Pgd1p;	CGGAATATCCATCCACTCACTCTCCGTTACAGCAGCTAATGATTCTTTCAAATCGGCAAATTGCCGTTTCACGTTTGAAGAATCAACTGAATTGTCATCATCCTTTTCATTAGCTCTTTTCTTTTTCTTTTGTGCTAATTTCAATTCAAGCGTTTTGAATACATTTGCAGCTTCATCATCTTCATCATCTTTCGGTTGGCTTTGAAGATGGTTGTTCAAATTTTCACGGTACCTTTTCGGTATTCTTCTTCCTTTGTCATCATTACTAACCACTTGCTTTTCTTTTGTTGAAAATCCAGTGGCTCCACGACCAATACCTGGTACGTAACCTGCAGGTGGTTCTTGATCCAAAAAAGATGGCCTCTCCATAAAATGTGACGTTTTCTTGCTGTTAAACTC…	CGGTATAATCGAGTCCATT
721	720	1	1	0	0	NC_001134	347518	349584	NC_001134	346930	347517	|gene |tRNA note= GO_component: cytosol [goid 0005829] [evidence NAS] |gene |CDS[fcd=-674](+,347877,349382) note= Ybr056wp;	|gene gene= PRP6 note= synonyms: TSM7269, RNA6 |CDS[fcd=76](-,344600,347299) gene= PRP6 note= Prp6p;	CGGAGGAGCTACTAAAGAAAGAGTGCTGCAATTAATACAATTAATATAAGTGTGGTTATTGAAAATAACTATTCATTTATACGGAGGGTTGGCCGAGTGGTCTAAGGCGGCAGACTTAAGATCTGTTGGACGGTTGTCCGCGCGAGTTCGAACCTCGCATCCTTCAGTAATATTTTTTTAATATACATTTTCTCTGCCATCATGGCTTAAAAAATGCTTAAAAGAAGGGAATTAGGGGGGATGGATGAACTAAGACATAACTTTCTTTTCTTCAATTCGAACTCTGTTGGGAAGAGTTGCTTTAAAAAAGACTCTCTATCCATCTATAAAATTTATTAAAACTTTTGAACTGCACAGAATGATTGGCTCACTTAGAAACAAATTTGAGCATTTCAAAGT…	CGGAATATCCATCCACTCACTCTCCGTTACAGCAGCTAATGATTCTTTCAAATCGGCAAATTGCCGTTTCACGTTTGAAGAATCAACTGAATTGTCATCATCCTTTTCATTAGCTCTTTTCTTTTTCTTTTGTGCTAATTTCAATTCAAGCGTTTTGAATACATTTGCAGCTTCATCATCTTCATCATCTTTCGGTTGGCTTTGAAGATGGTTGTTCAAATTTTCACGGTACCTTTTCGGTATTCTTCTTCCTTTGTCATCATTACTAACCACTTGCTTTTCTTTTGTTGAAAATCCAGTGGCTCCACGACCAATACCTGGTACGTAACCTGCAGGTGGTTCTTGATCCAAAAAAGATGGCCTCTCCATAAAATGTGACGTTTTCTTGCTGTTAAACTC…
721	5306	165	165	3792	3792	NC_001134	347518	349584	NC_001139	857273	857825	|gene |tRNA note= GO_component: cytosol [goid 0005829] [evidence NAS] |gene |CDS[fcd=-674](+,347877,349382) note= Ybr056wp;	|gene note= GO_component: cytosol [goid 0005829] [evidence NAS] |neigh_up CDS[fcd=-1243](-,855269,856306) gene= RNR4 note= Rnr4p; |neigh_down CDS[fcd=743](+,858292,858609) gene= TIM13 note= Tim13p;	CGGAGGAGCTACTAAAGAAAGAGTGCTGCAATTAATACAATTAATATAAGTGTGGTTATTGAAAATAACTATTCATTTATACGGAGGGTTGGCCGAGTGGTCTAAGGCGGCAGACTTAAGATCTGTTGGACGGTTGTCCGCGCGAGTTCGAACCTCGCATCCTTCAGTAATATTTTTTTAATATACATTTTCTCTGCCATCATGGCTTAAAAAATGCTTAAAAGAAGGGAATTAGGGGGGATGGATGAACTAAGACATAACTTTCTTTTCTTCAATTCGAACTCTGTTGGGAAGAGTTGCTTTAAAAAAGACTCTCTATCCATCTATAAAATTTATTAAAACTTTTGAACTGCACAGAATGATTGGCTCACTTAGAAACAAATTTGAGCATTTCAAAGT…	CGGTTCCCTTTCTTGCCTGAAATGCTCGTTCTAATGGAAAAAAAAAGAAATAAAGGTGGGCCTGCCCATTAGCAGGAAATTGGTACTTAATTATTGAAAAAAAAATTATTGGTTGCTAAGAGATTCGAACTCTTGCATCTTACGATACCTGAGTATTCCCACAGTTAACTGCGGTCAAGATATTTCTTGAATCAGGCGCCTTAGACCGCTCGGCCAAACAACCACTTATTTGTTGAAAGCGAGCGCGGTACAAGTAATGTTACCTCATCTGATATACAATAAAGGTGGAGCGCCAATATATACGCATTTGACTGTTCATAATTCATTGAATATAATTTATTCCTTGTTAGTACAAAAGGGTTAAACAGAAAAAGACGTGACGTTGTAACCGAGAGGATG…
721	721	2	2	1	1	NC_001134	347518	349584	NC_001134	347518	349584	|gene |tRNA note= GO_component: cytosol [goid 0005829] [evidence NAS] |gene |CDS[fcd=-674](+,347877,349382) note= Ybr056wp;	|gene |tRNA note= GO_component: cytosol [goid 0005829] [evidence NAS] |gene |CDS[fcd=-674](+,347877,349382) note= Ybr056wp;	CGGAGGAGCTACTAAAGAAAGAGTGCTGCAATTAATACAATTAATATAAGTGTGGTTATTGAAAATAACTATTCATTTATACGGAGGGTTGGCCGAGTGGTCTAAGGCGGCAGACTTAAGATCTGTTGGACGGTTGTCCGCGCGAGTTCGAACCTCGCATCCTTCAGTAATATTTTTTTAATATACATTTTCTCTGCCATCATGGCTTAAAAAATGCTTAAAAGAAGGGAATTAGGGGGGATGGATGAACTAAGACATAACTTTCTTTTCTTCAATTCGAACTCTGTTGGGAAGAGTTGCTTTAAAAAAGACTCTCTATCCATCTATAAAATTTATTAAAACTTTTGAACTGCACAGAATGATTGGCTCACTTAGAAACAAATTTGAGCATTTCAAAGT…	CGGAGGAGCTACTAAAGAAAGAGTGCTGCAATTAATACAATTAATATAAGTGTGGTTATTGAAAATAACTATTCATTTATACGGAGGGTTGGCCGAGTGGTCTAAGGCGGCAGACTTAAGATCTGTTGGACGGTTGTCCGCGCGAGTTCGAACCTCGCATCCTTCAGTAATATTTTTTTAATATACATTTTCTCTGCCATCATGGCTTAAAAAATGCTTAAAAGAAGGGAATTAGGGGGGATGGATGAACTAAGACATAACTTTCTTTTCTTCAATTCGAACTCTGTTGGGAAGAGTTGCTTTAAAAAAGACTCTCTATCCATCTATAAAATTTATTAAAACTTTTGAACTGCACAGAATGATTGGCTCACTTAGAAACAAATTTGAGCATTTCAAAGT…
721	2701	0	0	6	6	NC_001134	347518	349584	NC_001136	946389	946424	|gene |tRNA note= GO_component: cytosol [goid 0005829] [evidence NAS] |gene |CDS[fcd=-674](+,347877,349382) note= Ybr056wp;	|gene gene= SUP2 gene= SUP2 note= GO_component: cytosol [goid 0005829] [evidence NAS] |neigh_up CDS[fcd=-1258](-,943670,945148) gene= SNU56 note= Snu56p; |neigh_down CDS[fcd=397](+,946803,948452) gene= AMD2 note= Amd2p;	CGGAGGAGCTACTAAAGAAAGAGTGCTGCAATTAATACAATTAATATAAGTGTGGTTATTGAAAATAACTATTCATTTATACGGAGGGTTGGCCGAGTGGTCTAAGGCGGCAGACTTAAGATCTGTTGGACGGTTGTCCGCGCGAGTTCGAACCTCGCATCCTTCAGTAATATTTTTTTAATATACATTTTCTCTGCCATCATGGCTTAAAAAATGCTTAAAAGAAGGGAATTAGGGGGGATGGATGAACTAAGACATAACTTTCTTTTCTTCAATTCGAACTCTGTTGGGAAGAGTTGCTTTAAAAAAGACTCTCTATCCATCTATAAAATTTATTAAAACTTTTGAACTGCACAGAATGATTGGCTCACTTAGAAACAAATTTGAGCATTTCAAAGT…	CGGGAGATTTTTTTATGTCAAGCACCTACTTTTAG
721	2700	0	0	0	1	NC_001134	347518	349584	NC_001136	945976	946388	|gene |tRNA note= GO_component: cytosol [goid 0005829] [evidence NAS] |gene |CDS[fcd=-674](+,347877,349382) note= Ybr056wp;	|LTR note= YDRCSIGMA3 |gene gene= SUP2 gene= SUP2 note= GO_component: cytosol [goid 0005829] [evidence NAS] |neigh_up CDS[fcd=-1034](-,943670,945148) gene= SNU56 note= Snu56p; |neigh_down CDS[fcd=621](+,946803,948452) gene= AMD2 note= Amd2p;	CGGAGGAGCTACTAAAGAAAGAGTGCTGCAATTAATACAATTAATATAAGTGTGGTTATTGAAAATAACTATTCATTTATACGGAGGGTTGGCCGAGTGGTCTAAGGCGGCAGACTTAAGATCTGTTGGACGGTTGTCCGCGCGAGTTCGAACCTCGCATCCTTCAGTAATATTTTTTTAATATACATTTTCTCTGCCATCATGGCTTAAAAAATGCTTAAAAGAAGGGAATTAGGGGGGATGGATGAACTAAGACATAACTTTCTTTTCTTCAATTCGAACTCTGTTGGGAAGAGTTGCTTTAAAAAAGACTCTCTATCCATCTATAAAATTTATTAAAACTTTTGAACTGCACAGAATGATTGGCTCACTTAGAAACAAATTTGAGCATTTCAAAGT…	CGGAGTGTTTTGACAATCCTAATATAAACAGTCTTAGGGAAGTAACCAGTTGTCAAAACAGTTTATCAGATTAATTCACGGAATGTTACTTATCTTATATATTATATAAAATATGAATCATACTAAGTGGTGGAAGCGCGGAATCTCGGATCTAAACTAATTGTTCAGGCATTTATACTTTTGGGTAGTTCAGCTAGGGAAGGACGGGTTTTGTCTCATGTTGTTCGTTTTGTTATAAGGTTGTTTCATATGTGTTTTATGAACGTTTAGGATGACGTATTGTCATACTGACGTATCTCATTTTGAGATACAACACCTCGCAAGAAATCGACTCTCGGTAGCCAAGTTGGTTTAAGGCGCAAGACTGTAATTTATCACTACGAAATCTTGAGATCGGGC…
721	1269	0	0	0	1	NC_001134	347518	349584	NC_001135	10448	10641	|gene |tRNA note= GO_component: cytosol [goid 0005829] [evidence NAS] |gene |CDS[fcd=-674](+,347877,349382) note= Ybr056wp;	|gene gene= VBA3 |CDS[fcd=-838](+,9706,11082) gene= VBA3 note= Vba3p;	CGGAGGAGCTACTAAAGAAAGAGTGCTGCAATTAATACAATTAATATAAGTGTGGTTATTGAAAATAACTATTCATTTATACGGAGGGTTGGCCGAGTGGTCTAAGGCGGCAGACTTAAGATCTGTTGGACGGTTGTCCGCGCGAGTTCGAACCTCGCATCCTTCAGTAATATTTTTTTAATATACATTTTCTCTGCCATCATGGCTTAAAAAATGCTTAAAAGAAGGGAATTAGGGGGGATGGATGAACTAAGACATAACTTTCTTTTCTTCAATTCGAACTCTGTTGGGAAGAGTTGCTTTAAAAAAGACTCTCTATCCATCTATAAAATTTATTAAAACTTTTGAACTGCACAGAATGATTGGCTCACTTAGAAACAAATTTGAGCATTTCAAAGT…	CGGTCTTCACTTGATACCAATCGTTATTACCAACGTTATTGCGGCCATTGCAAGTGGTGTGATTACCAAAAAGCTCGGTTTAGTTAAACCACTCTTAATATTTGGAGGCGTTCTTGGGGTAATTGGAGCAGGGCTTATGACACTTATGACAAATACGTCCACGAAGTCAACTCAAATTGGTGTTTTGCTATTA
721	9813	0	0	0	1	NC_001134	347518	349584	NC_001145	168324	168875	|gene |tRNA note= GO_component: cytosol [goid 0005829] [evidence NAS] |gene |CDS[fcd=-674](+,347877,349382) note= Ybr056wp;	|LTR note= YMLCDELTA2 |gene gene= SUP5 gene= SUP5 note= GO_component: cytosol [goid 0005829] [evidence NAS] |neigh_up CDS[fcd=-818](-,167623,167781) note= Yml054c-ap; |neigh_down CDS[fcd=1155](-,169116,169754) note= Yml053cp;	CGGAGGAGCTACTAAAGAAAGAGTGCTGCAATTAATACAATTAATATAAGTGTGGTTATTGAAAATAACTATTCATTTATACGGAGGGTTGGCCGAGTGGTCTAAGGCGGCAGACTTAAGATCTGTTGGACGGTTGTCCGCGCGAGTTCGAACCTCGCATCCTTCAGTAATATTTTTTTAATATACATTTTCTCTGCCATCATGGCTTAAAAAATGCTTAAAAGAAGGGAATTAGGGGGGATGGATGAACTAAGACATAACTTTCTTTTCTTCAATTCGAACTCTGTTGGGAAGAGTTGCTTTAAAAAAGACTCTCTATCCATCTATAAAATTTATTAAAACTTTTGAACTGCACAGAATGATTGGCTCACTTAGAAACAAATTTGAGCATTTCAAAGT…	CGGATTTATTTCGTAAATTCTTATTGAAGAATGGGTGAATTTTGAGATAATCGTTGGGATTCCATTTTTAATAAGGCAATAATATTAGGTATGTAGAATGTACTAGAAGTTCTCCTCGAGGATTTAGGAATCCATAAAAGGGAATCTGCAATTCTACACAATTCTATAAATATTATTATCATCATTTTATATGTTAATATTCATTGATCCTATTACATTATCAATCCTTGCGTTTCAGCTTCCACTAATTTAGATGACTATTTCTCATCATTTGCGTCATCTTCTAACACCGTATATGATAATATACTAGTAACGTAAATACTAGTTAGTAGATGATAGTTGATTTTTATTCCAACACTTATATTCTATATATCCATAACATTGTCTACATATAATCCG…
740	5306	0	0	4	4	NC_001134	364242	364450	NC_001139	857273	857825	|neigh_up CDS[fcd=-1834](-,360650,362512) gene= ORC2 note= Orc2p; |neigh_down CDS[fcd=1371](-,364785,365717) gene= TRM7 note= Trm7p;	|gene note= GO_component: cytosol [goid 0005829] [evidence NAS] |neigh_up CDS[fcd=-1243](-,855269,856306) gene= RNR4 note= Rnr4p; |neigh_down CDS[fcd=743](+,858292,858609) gene= TIM13 note= Tim13p;	CGGGTTTATGTGAGCGTTTCGAGGTTTTTGTATCTAAAAAGGAGATATGTAATGCGTAAACCCGAACTGAACAATTCGTTTGACCAAAAGGGGCTTTCCTACAAACAAGCAGGGCAATAGGAGCAAGGCAAATGGATCAAGGTGATGCTTATGCATAATTTATACGATGGAATCCTTTGTAATGCTCCGTACTACGGTTTACCACCAA	CGGTTCCCTTTCTTGCCTGAAATGCTCGTTCTAATGGAAAAAAAAAGAAATAAAGGTGGGCCTGCCCATTAGCAGGAAATTGGTACTTAATTATTGAAAAAAAAATTATTGGTTGCTAAGAGATTCGAACTCTTGCATCTTACGATACCTGAGTATTCCCACAGTTAACTGCGGTCAAGATATTTCTTGAATCAGGCGCCTTAGACCGCTCGGCCAAACAACCACTTATTTGTTGAAAGCGAGCGCGGTACAAGTAATGTTACCTCATCTGATATACAATAAAGGTGGAGCGCCAATATATACGCATTTGACTGTTCATAATTCATTGAATATAATTTATTCCTTGTTAGTACAAAAGGGTTAAACAGAAAAAGACGTGACGTTGTAACCGAGAGGATG…
746	5306	3	3	0	0	NC_001134	370348	370461	NC_001139	857273	857825	|gene gene= NRG2 |CDS[fcd=293](-,370035,370697) gene= NRG2 note= Nrg2p;	|gene note= GO_component: cytosol [goid 0005829] [evidence NAS] |neigh_up CDS[fcd=-1243](-,855269,856306) gene= RNR4 note= Rnr4p; |neigh_down CDS[fcd=743](+,858292,858609) gene= TIM13 note= Tim13p;	CGGTATTCTCTGCTTTTACAATATTAATATTTTGCAATGGCAGTATCGGTGACGTTTTTCCACTTGCTGTTAATCTTGAAATAGTCCCGTCACTCGTTCTGTTCGCTTGTTTT	CGGTTCCCTTTCTTGCCTGAAATGCTCGTTCTAATGGAAAAAAAAAGAAATAAAGGTGGGCCTGCCCATTAGCAGGAAATTGGTACTTAATTATTGAAAAAAAAATTATTGGTTGCTAAGAGATTCGAACTCTTGCATCTTACGATACCTGAGTATTCCCACAGTTAACTGCGGTCAAGATATTTCTTGAATCAGGCGCCTTAGACCGCTCGGCCAAACAACCACTTATTTGTTGAAAGCGAGCGCGGTACAAGTAATGTTACCTCATCTGATATACAATAAAGGTGGAGCGCCAATATATACGCATTTGACTGTTCATAATTCATTGAATATAATTTATTCCTTGTTAGTACAAAAGGGTTAAACAGAAAAAGACGTGACGTTGTAACCGAGAGGATG…
761	5306	0	0	318	318	NC_001134	377958	378050	NC_001139	857273	857825	|gene gene= TAT1 note= synonyms: VAP1, TAP1 |CDS[fcd=426](-,376571,378430) gene= TAT1 note= Tat1p;	|gene note= GO_component: cytosol [goid 0005829] [evidence NAS] |neigh_up CDS[fcd=-1243](-,855269,856306) gene= RNR4 note= Rnr4p; |neigh_down CDS[fcd=743](+,858292,858609) gene= TIM13 note= Tim13p;	CGGTTAGTCCTGCATAACAGAGACCTAACTCGCCTGCCGCTTGGATGATACAGTAAAGCATGATCGATGCTATTCCGTAACCAAGGACTAAC	CGGTTCCCTTTCTTGCCTGAAATGCTCGTTCTAATGGAAAAAAAAAGAAATAAAGGTGGGCCTGCCCATTAGCAGGAAATTGGTACTTAATTATTGAAAAAAAAATTATTGGTTGCTAAGAGATTCGAACTCTTGCATCTTACGATACCTGAGTATTCCCACAGTTAACTGCGGTCAAGATATTTCTTGAATCAGGCGCCTTAGACCGCTCGGCCAAACAACCACTTATTTGTTGAAAGCGAGCGCGGTACAAGTAATGTTACCTCATCTGATATACAATAAAGGTGGAGCGCCAATATATACGCATTTGACTGTTCATAATTCATTGAATATAATTTATTCCTTGTTAGTACAAAAGGGTTAAACAGAAAAAGACGTGACGTTGTAACCGAGAGGATG…
803	5306	0	0	2	2	NC_001134	412957	413313	NC_001139	857273	857825	|gene gene= MIS1 |CDS[fcd=-2087](+,411048,413975) gene= MIS1 note= Mis1p;	|gene note= GO_component: cytosol [goid 0005829] [evidence NAS] |neigh_up CDS[fcd=-1243](-,855269,856306) gene= RNR4 note= Rnr4p; |neigh_down CDS[fcd=743](+,858292,858609) gene= TIM13 note= Tim13p;	CGGTGCTCTGACTGCATTATTACGTGACGCTATAAAGCCTAACTTAATGCAAACTTTGGAAGGGACCCCCGTAATGGTTCACGCTGGTCCTTTCGCCAACATCTCCATCGGCGCATCATCAGTAATTGCAGACTTAATGGCATTGAAGCTTGTTGGTTCAGAAAAGAACCCGTTAAATGACAAGAACATCCATGAACCTGGTTATGTAGTTACTGAAGCAGGATTCGATTTTGCCATGGGTGGTGAAAGATTCTTTGATATCAAATGTCGTTCCTCTGGATTGGTGCCAGATGCAGTTGTCTTAGTCGCAACCGTAAGAGCTTTGAAATCTCATGGAGGTGCTCCAAATGTTAAGC	CGGTTCCCTTTCTTGCCTGAAATGCTCGTTCTAATGGAAAAAAAAAGAAATAAAGGTGGGCCTGCCCATTAGCAGGAAATTGGTACTTAATTATTGAAAAAAAAATTATTGGTTGCTAAGAGATTCGAACTCTTGCATCTTACGATACCTGAGTATTCCCACAGTTAACTGCGGTCAAGATATTTCTTGAATCAGGCGCCTTAGACCGCTCGGCCAAACAACCACTTATTTGTTGAAAGCGAGCGCGGTACAAGTAATGTTACCTCATCTGATATACAATAAAGGTGGAGCGCCAATATATACGCATTTGACTGTTCATAATTCATTGAATATAATTTATTCCTTGTTAGTACAAAAGGGTTAAACAGAAAAAGACGTGACGTTGTAACCGAGAGGATG…
841	5306	1	1	0	0	NC_001134	451432	452065	NC_001139	857273	857825	|gene gene= VID24 note= synonym: GID4 |CDS[fcd=215](-,450875,451963) gene= VID24 note= Vid24p;	|gene note= GO_component: cytosol [goid 0005829] [evidence NAS] |neigh_up CDS[fcd=-1243](-,855269,856306) gene= RNR4 note= Rnr4p; |neigh_down CDS[fcd=743](+,858292,858609) gene= TIM13 note= Tim13p;	CGGGTGTTGGTTCGTGAGTCCTCTTATCGACAAAAATCCAGATAAATGAGGGGACAGCGACGTGCAATCTTTCTTTGGCAAATCTACAGTCTTTAAGTTAACTGTTACCTGATAGCGTTTGTATCCTGATATCTGGTACCCTGTAAACTGCATTCTTGGTCTTAAGTAGTTTGTGCAAACCGTATGGTTATAGGAAGAGGTCACAATGACTGGATTTTCCGAACTATAGGGAGATTGGTCCTCAACAATATATTTCTTCCTTGTCGACCCATTAGGTGTATGGGCGAGTTGCTGCAGGGAAGACAACGAATCCCTAGAAGCGCACTTGTAAAGATCTTGCTCTTGTAAGTAGCGATGACGGTCATGAAGATGAAAGGGTGCGGTTGAAGTCAAGTTGAA…	CGGTTCCCTTTCTTGCCTGAAATGCTCGTTCTAATGGAAAAAAAAAGAAATAAAGGTGGGCCTGCCCATTAGCAGGAAATTGGTACTTAATTATTGAAAAAAAAATTATTGGTTGCTAAGAGATTCGAACTCTTGCATCTTACGATACCTGAGTATTCCCACAGTTAACTGCGGTCAAGATATTTCTTGAATCAGGCGCCTTAGACCGCTCGGCCAAACAACCACTTATTTGTTGAAAGCGAGCGCGGTACAAGTAATGTTACCTCATCTGATATACAATAAAGGTGGAGCGCCAATATATACGCATTTGACTGTTCATAATTCATTGAATATAATTTATTCCTTGTTAGTACAAAAGGGTTAAACAGAAAAAGACGTGACGTTGTAACCGAGAGGATG…
843	5306	2	3	0	0	NC_001134	452260	452322	NC_001139	857273	857825	|neigh_up CDS[fcd=-328](-,450875,451963) gene= VID24 note= Vid24p; |neigh_down CDS[fcd=361](+,452652,453218) gene= PHO88 note= Pho88p;	|gene note= GO_component: cytosol [goid 0005829] [evidence NAS] |neigh_up CDS[fcd=-1243](-,855269,856306) gene= RNR4 note= Rnr4p; |neigh_down CDS[fcd=743](+,858292,858609) gene= TIM13 note= Tim13p;	CGGAAAAGAAAAAAAAAACGAAAATTAAAACCCGCCTGCCCCGCGGGGTGGGGGAGGGGTCA	CGGTTCCCTTTCTTGCCTGAAATGCTCGTTCTAATGGAAAAAAAAAGAAATAAAGGTGGGCCTGCCCATTAGCAGGAAATTGGTACTTAATTATTGAAAAAAAAATTATTGGTTGCTAAGAGATTCGAACTCTTGCATCTTACGATACCTGAGTATTCCCACAGTTAACTGCGGTCAAGATATTTCTTGAATCAGGCGCCTTAGACCGCTCGGCCAAACAACCACTTATTTGTTGAAAGCGAGCGCGGTACAAGTAATGTTACCTCATCTGATATACAATAAAGGTGGAGCGCCAATATATACGCATTTGACTGTTCATAATTCATTGAATATAATTTATTCCTTGTTAGTACAAAAGGGTTAAACAGAAAAAGACGTGACGTTGTAACCGAGAGGATG…
847	5306	42	42	0	0	NC_001134	453088	453189	NC_001139	857273	857825	|gene gene= PHO88 |CDS[fcd=-486](+,452652,453218) gene= PHO88 note= Pho88p;	|gene note= GO_component: cytosol [goid 0005829] [evidence NAS] |neigh_up CDS[fcd=-1243](-,855269,856306) gene= RNR4 note= Rnr4p; |neigh_down CDS[fcd=743](+,858292,858609) gene= TIM13 note= Tim13p;	CGGCGATTTGAAGAGACCATTCAAGGCTCCATCTTTGTTTGGTGGTATGGGTCAAACTGGTCCAAAGACCGACAAGAAATCTATCGAAGAAGCTGAAAGAG	CGGTTCCCTTTCTTGCCTGAAATGCTCGTTCTAATGGAAAAAAAAAGAAATAAAGGTGGGCCTGCCCATTAGCAGGAAATTGGTACTTAATTATTGAAAAAAAAATTATTGGTTGCTAAGAGATTCGAACTCTTGCATCTTACGATACCTGAGTATTCCCACAGTTAACTGCGGTCAAGATATTTCTTGAATCAGGCGCCTTAGACCGCTCGGCCAAACAACCACTTATTTGTTGAAAGCGAGCGCGGTACAAGTAATGTTACCTCATCTGATATACAATAAAGGTGGAGCGCCAATATATACGCATTTGACTGTTCATAATTCATTGAATATAATTTATTCCTTGTTAGTACAAAAGGGTTAAACAGAAAAAGACGTGACGTTGTAACCGAGAGGATG…
870	5306	2	2	0	0	NC_001134	473709	474128	NC_001139	857273	857825	|gene gene= LYS2 |CDS[fcd=2](-,469742,473920) gene= LYS2 note= Lys2p;	|gene note= GO_component: cytosol [goid 0005829] [evidence NAS] |neigh_up CDS[fcd=-1243](-,855269,856306) gene= RNR4 note= Rnr4p; |neigh_down CDS[fcd=743](+,858292,858609) gene= TIM13 note= Tim13p;	CGGTTACTCTATATATCAATGCAGCCCATACACTCAAAGCGACAGCGTATTTGTTAGAAAAACTATCATGAGGCACATCGAGCTGAGGTAGCTGTAACGAATATGTAGCTTGTTTCGTATAAGGTTCTTGTTGTGGGCGTAAAAAGTCATGTGGTAACACTGAAAGAGTTGGATTATCCAACTTCTCTATCCAGACCTTTTCGTTAGTCATTAGTGAGTAACTCTGTGATATCTCTCTATAATTAGCAGTTTTTCACTGAAATTCCAGGAAAGGTAATAAACTCAGATTTTTTTTTATACTATTGGCTGCTTGTTACTTATATATCTTGAACTTCTCCCAGCGGGTCTTCAAATACATTTGGGCGATGTTCATGTTCATTAGGCAGGTATTTCGACATT…	CGGTTCCCTTTCTTGCCTGAAATGCTCGTTCTAATGGAAAAAAAAAGAAATAAAGGTGGGCCTGCCCATTAGCAGGAAATTGGTACTTAATTATTGAAAAAAAAATTATTGGTTGCTAAGAGATTCGAACTCTTGCATCTTACGATACCTGAGTATTCCCACAGTTAACTGCGGTCAAGATATTTCTTGAATCAGGCGCCTTAGACCGCTCGGCCAAACAACCACTTATTTGTTGAAAGCGAGCGCGGTACAAGTAATGTTACCTCATCTGATATACAATAAAGGTGGAGCGCCAATATATACGCATTTGACTGTTCATAATTCATTGAATATAATTTATTCCTTGTTAGTACAAAAGGGTTAAACAGAAAAAGACGTGACGTTGTAACCGAGAGGATG…
879	5306	0	0	0	1	NC_001134	477735	478037	NC_001139	857273	857825	|gene gene= TEF2 |CDS[fcd=-221](+,477665,479041) gene= TEF2 note= Tef2p;	|gene note= GO_component: cytosol [goid 0005829] [evidence NAS] |neigh_up CDS[fcd=-1243](-,855269,856306) gene= RNR4 note= Rnr4p; |neigh_down CDS[fcd=743](+,858292,858609) gene= TIM13 note= Tim13p;	CGGTCATTTGATTTACAAGTGTGGTGGTATTGACAAGAGAACCATCGAAAAGTTCGAAAAGGAAGCCGCTGAATTAGGTAAGGGTTCTTTCAAGTACGCTTGGGTTTTGGACAAGTTAAAGGCTGAAAGAGAAAGAGGTATCACTATCGATATTGCTTTGTGGAAGTTCGAAACTCCAAAGTACCAAGTTACCGTTATTGATGCTCCAGGTCACAGAGATTTCATCAAGAACATGATTACTGGTACTTCTCAAGCTGACTGTGCTATCTTGATTATTGCTGGTGGTGTCGGTGAATTCGAAG	CGGTTCCCTTTCTTGCCTGAAATGCTCGTTCTAATGGAAAAAAAAAGAAATAAAGGTGGGCCTGCCCATTAGCAGGAAATTGGTACTTAATTATTGAAAAAAAAATTATTGGTTGCTAAGAGATTCGAACTCTTGCATCTTACGATACCTGAGTATTCCCACAGTTAACTGCGGTCAAGATATTTCTTGAATCAGGCGCCTTAGACCGCTCGGCCAAACAACCACTTATTTGTTGAAAGCGAGCGCGGTACAAGTAATGTTACCTCATCTGATATACAATAAAGGTGGAGCGCCAATATATACGCATTTGACTGTTCATAATTCATTGAATATAATTTATTCCTTGTTAGTACAAAAGGGTTAAACAGAAAAAGACGTGACGTTGTAACCGAGAGGATG…
918	5306	1	1	0	0	NC_001134	518695	518881	NC_001139	857273	857825	|gene gene= IRA1 note= synonyms: PPD1, GLC1 |CDS[fcd=7834](-,517344,526622) gene= IRA1 note= Ira1p;	|gene note= GO_component: cytosol [goid 0005829] [evidence NAS] |neigh_up CDS[fcd=-1243](-,855269,856306) gene= RNR4 note= Rnr4p; |neigh_down CDS[fcd=743](+,858292,858609) gene= TIM13 note= Tim13p;	CGGAGATAAAGTTCAACTTTTGACGTGCGAATGTTGCACAGACGATATCCAAATTTTTCCTATTCCTTTCAGGTAAGGACTCATTGTTGGTTAAAGAATGACAAACATTCATCAACAACTCGTACAATGAGACTCTTATTTCCGAAGGACCGACATCAATTAACAGAGACACAGCGAAAAGAATCT	CGGTTCCCTTTCTTGCCTGAAATGCTCGTTCTAATGGAAAAAAAAAGAAATAAAGGTGGGCCTGCCCATTAGCAGGAAATTGGTACTTAATTATTGAAAAAAAAATTATTGGTTGCTAAGAGATTCGAACTCTTGCATCTTACGATACCTGAGTATTCCCACAGTTAACTGCGGTCAAGATATTTCTTGAATCAGGCGCCTTAGACCGCTCGGCCAAACAACCACTTATTTGTTGAAAGCGAGCGCGGTACAAGTAATGTTACCTCATCTGATATACAATAAAGGTGGAGCGCCAATATATACGCATTTGACTGTTCATAATTCATTGAATATAATTTATTCCTTGTTAGTACAAAAGGGTTAAACAGAAAAAGACGTGACGTTGTAACCGAGAGGATG…
1042	5306	0	0	8	8	NC_001134	629964	630306	NC_001139	857273	857825	|gene gene= COS111 |CDS[fcd=-972](+,629163,631937) gene= COS111 note= Cos111p;	|gene note= GO_component: cytosol [goid 0005829] [evidence NAS] |neigh_up CDS[fcd=-1243](-,855269,856306) gene= RNR4 note= Rnr4p; |neigh_down CDS[fcd=743](+,858292,858609) gene= TIM13 note= Tim13p;	CGGGAATTATAGGCCAAGACTCGAAGGATTCTCAAGGCCTAGACGATGATGGCCACTCAAGGCGTCACAGACGCCGTCGCCGCAGATCTACTAACACAAGTTTGAATCTACCTCCAGCTACTCCAACATCTACCATTTCTAACGAGGATGATGCCAATAGCGGATTAATCAAAGACGACGCTTCAAATGGCAGTGAAGTTGAAGACTTGGCATTAGCTGGTTGGAGAGACTGGAGATACAGAAATGAACCCCTTTATAGCTCTCCTCTGTTGAACAGCTTTAAACTGAAAAAAGTGGTTTCTCGTTCTTCTTCTATCACTTCTACATCTTCTGGAAATTCCA	CGGTTCCCTTTCTTGCCTGAAATGCTCGTTCTAATGGAAAAAAAAAGAAATAAAGGTGGGCCTGCCCATTAGCAGGAAATTGGTACTTAATTATTGAAAAAAAAATTATTGGTTGCTAAGAGATTCGAACTCTTGCATCTTACGATACCTGAGTATTCCCACAGTTAACTGCGGTCAAGATATTTCTTGAATCAGGCGCCTTAGACCGCTCGGCCAAACAACCACTTATTTGTTGAAAGCGAGCGCGGTACAAGTAATGTTACCTCATCTGATATACAATAAAGGTGGAGCGCCAATATATACGCATTTGACTGTTCATAATTCATTGAATATAATTTATTCCTTGTTAGTACAAAAGGGTTAAACAGAAAAAGACGTGACGTTGTAACCGAGAGGATG…
1089	5306	0	0	0	6	NC_001134	671225	672498	NC_001139	857273	857825	|gene |CDS[fcd=-1239](+,670622,673324) note= Ybr225wp;	|gene note= GO_component: cytosol [goid 0005829] [evidence NAS] |neigh_up CDS[fcd=-1243](-,855269,856306) gene= RNR4 note= Rnr4p; |neigh_down CDS[fcd=743](+,858292,858609) gene= TIM13 note= Tim13p;	CGGCATCAGATTCTTCTCTTCTAATCAAAACCGTTTCAGGAAATCATAATTTAATCAACATTTGCATAGACGGTGAATTCAAACAAATAATGTACGACCCGAATCATAATGAGCTCTTTAATAGAATGGACTTGTTTCTATCTTTTAACATGGACTCCTCGCCAGAAGACTCTTTAATATTTGCCAAGAAAAGATTACGGTCGTACATTGATTTCCTAACAAAATATTTGGAATCTAGGAAATATGCATTTGAATGTTATCCATTTAACATTGAAAACATCATAAATATAGAGACTGAGGTTAAATGCTTTCCATCGTTTGACCCGTTAAAAGATTATTCTGAAATTGAATCCTTGATTCAATTATGGTTGGCTCAATCTCAAAAATTTTTACTGCAAT…	CGGTTCCCTTTCTTGCCTGAAATGCTCGTTCTAATGGAAAAAAAAAGAAATAAAGGTGGGCCTGCCCATTAGCAGGAAATTGGTACTTAATTATTGAAAAAAAAATTATTGGTTGCTAAGAGATTCGAACTCTTGCATCTTACGATACCTGAGTATTCCCACAGTTAACTGCGGTCAAGATATTTCTTGAATCAGGCGCCTTAGACCGCTCGGCCAAACAACCACTTATTTGTTGAAAGCGAGCGCGGTACAAGTAATGTTACCTCATCTGATATACAATAAAGGTGGAGCGCCAATATATACGCATTTGACTGTTCATAATTCATTGAATATAATTTATTCCTTGTTAGTACAAAAGGGTTAAACAGAAAAAGACGTGACGTTGTAACCGAGAGGATG…
1228	5306	1	1	0	0	NC_001134	786939	787475	NC_001139	857273	857825	|gene gene= VBA2 |CDS[fcd=-206](+,787001,788425) gene= VBA2 note= Vba2p;	|gene note= GO_component: cytosol [goid 0005829] [evidence NAS] |neigh_up CDS[fcd=-1243](-,855269,856306) gene= RNR4 note= Rnr4p; |neigh_down CDS[fcd=743](+,858292,858609) gene= TIM13 note= Tim13p;	CGGTTTTGACGGAACCGTTACAGCTTCGACGTACCAAACGATTGGTAACGAATTTAATCAGATGAGTATTTCAAATTGGATCACCACTGCGTATTTAATTACATCAACATCTTTTCAACCTCTTTATGGGTCATTTTCTGATGCACTTGGTCGAAGAAACTGCCTTTTCTTTGCTAATGGGGCTTTTACCATTGGATGTCTAGCCTGTGGTTTCTCGAAAAACATCTACATGCTTAGTTTTATGAGAGCATTGACAGGCATAGGAGGTGGTGGCTTGATCACACTTTCTACAATCGTAAATTCAGACGTTATTCCAAGTTCGAAAAGAGGAATTTTTCAAGCGTTTCAGAATTTACTTTTGGGATTTGGTGCCATATGTGGAGCGTCTTTCGGTGGCAC…	CGGTTCCCTTTCTTGCCTGAAATGCTCGTTCTAATGGAAAAAAAAAGAAATAAAGGTGGGCCTGCCCATTAGCAGGAAATTGGTACTTAATTATTGAAAAAAAAATTATTGGTTGCTAAGAGATTCGAACTCTTGCATCTTACGATACCTGAGTATTCCCACAGTTAACTGCGGTCAAGATATTTCTTGAATCAGGCGCCTTAGACCGCTCGGCCAAACAACCACTTATTTGTTGAAAGCGAGCGCGGTACAAGTAATGTTACCTCATCTGATATACAATAAAGGTGGAGCGCCAATATATACGCATTTGACTGTTCATAATTCATTGAATATAATTTATTCCTTGTTAGTACAAAAGGGTTAAACAGAAAAAGACGTGACGTTGTAACCGAGAGGATG…
1250	5306	0	0	55	118	NC_001134	808386	808522	NC_001139	857273	857825	|neigh_up CDS[fcd=-3109](+,805345,807099) gene= MAL32 note= Mal32p; |neigh_down CDS[fcd=597](+,809051,809413) gene= DAN3 note= Dan3p;	|gene note= GO_component: cytosol [goid 0005829] [evidence NAS] |neigh_up CDS[fcd=-1243](-,855269,856306) gene= RNR4 note= Rnr4p; |neigh_down CDS[fcd=743](+,858292,858609) gene= TIM13 note= Tim13p;	CGGTATGGCCAGCTTGATCCAGTGGAAGTTCCGCTGTTTCAGAACTAGGGCTTCGTAGCACCTCGAATGCTCATTTATTCTTGTCAACATTTTTGCTGGCAGTGTATAAGACTGTAGGCACCTACAATATACGACT	CGGTTCCCTTTCTTGCCTGAAATGCTCGTTCTAATGGAAAAAAAAAGAAATAAAGGTGGGCCTGCCCATTAGCAGGAAATTGGTACTTAATTATTGAAAAAAAAATTATTGGTTGCTAAGAGATTCGAACTCTTGCATCTTACGATACCTGAGTATTCCCACAGTTAACTGCGGTCAAGATATTTCTTGAATCAGGCGCCTTAGACCGCTCGGCCAAACAACCACTTATTTGTTGAAAGCGAGCGCGGTACAAGTAATGTTACCTCATCTGATATACAATAAAGGTGGAGCGCCAATATATACGCATTTGACTGTTCATAATTCATTGAATATAATTTATTCCTTGTTAGTACAAAAGGGTTAAACAGAAAAAGACGTGACGTTGTAACCGAGAGGATG…
1269	721	0	0	0	1	NC_001135	10448	10641	NC_001134	347518	349584	|gene gene= VBA3 |CDS[fcd=-838](+,9706,11082) gene= VBA3 note= Vba3p;	|gene |tRNA note= GO_component: cytosol [goid 0005829] [evidence NAS] |gene |CDS[fcd=-674](+,347877,349382) note= Ybr056wp;	CGGTCTTCACTTGATACCAATCGTTATTACCAACGTTATTGCGGCCATTGCAAGTGGTGTGATTACCAAAAAGCTCGGTTTAGTTAAACCACTCTTAATATTTGGAGGCGTTCTTGGGGTAATTGGAGCAGGGCTTATGACACTTATGACAAATACGTCCACGAAGTCAACTCAAATTGGTGTTTTGCTATTA	CGGAGGAGCTACTAAAGAAAGAGTGCTGCAATTAATACAATTAATATAAGTGTGGTTATTGAAAATAACTATTCATTTATACGGAGGGTTGGCCGAGTGGTCTAAGGCGGCAGACTTAAGATCTGTTGGACGGTTGTCCGCGCGAGTTCGAACCTCGCATCCTTCAGTAATATTTTTTTAATATACATTTTCTCTGCCATCATGGCTTAAAAAATGCTTAAAAGAAGGGAATTAGGGGGGATGGATGAACTAAGACATAACTTTCTTTTCTTCAATTCGAACTCTGTTGGGAAGAGTTGCTTTAAAAAAGACTCTCTATCCATCTATAAAATTTATTAAAACTTTTGAACTGCACAGAATGATTGGCTCACTTAGAAACAAATTTGAGCATTTCAAAGT…
1269	5306	0	0	0	1	NC_001135	10448	10641	NC_001139	857273	857825	|gene gene= VBA3 |CDS[fcd=-838](+,9706,11082) gene= VBA3 note= Vba3p;	|gene note= GO_component: cytosol [goid 0005829] [evidence NAS] |neigh_up CDS[fcd=-1243](-,855269,856306) gene= RNR4 note= Rnr4p; |neigh_down CDS[fcd=743](+,858292,858609) gene= TIM13 note= Tim13p;	CGGTCTTCACTTGATACCAATCGTTATTACCAACGTTATTGCGGCCATTGCAAGTGGTGTGATTACCAAAAAGCTCGGTTTAGTTAAACCACTCTTAATATTTGGAGGCGTTCTTGGGGTAATTGGAGCAGGGCTTATGACACTTATGACAAATACGTCCACGAAGTCAACTCAAATTGGTGTTTTGCTATTA	CGGTTCCCTTTCTTGCCTGAAATGCTCGTTCTAATGGAAAAAAAAAGAAATAAAGGTGGGCCTGCCCATTAGCAGGAAATTGGTACTTAATTATTGAAAAAAAAATTATTGGTTGCTAAGAGATTCGAACTCTTGCATCTTACGATACCTGAGTATTCCCACAGTTAACTGCGGTCAAGATATTTCTTGAATCAGGCGCCTTAGACCGCTCGGCCAAACAACCACTTATTTGTTGAAAGCGAGCGCGGTACAAGTAATGTTACCTCATCTGATATACAATAAAGGTGGAGCGCCAATATATACGCATTTGACTGTTCATAATTCATTGAATATAATTTATTCCTTGTTAGTACAAAAGGGTTAAACAGAAAAAGACGTGACGTTGTAACCGAGAGGATG…
1373	5306	0	0	0	1	NC_001135	85222	85470	NC_001139	857273	857825	|repeat_region note= Transposon YCLWTY2-1; Long Terminal Repeat (LTR) |gene note= Ycl019wp; |gene |CDS[fcd=-244](+,85102,86418) note= Ycl020wp;	|gene note= GO_component: cytosol [goid 0005829] [evidence NAS] |neigh_up CDS[fcd=-1243](-,855269,856306) gene= RNR4 note= Rnr4p; |neigh_down CDS[fcd=743](+,858292,858609) gene= TIM13 note= Tim13p;	CGGAATTTGATAGAGATTCCACTAAGGTTAATTCTCAACAAGAGACAACACCTGGGACATCAGCTGTTCCAGAGAACCATCATCATGTCTCTCCTCAACCTGCTTCAGTACCACCTCCACAGAATGGACAGTACCAACAGCACGGCATGATGACCCCAAACAAAGCTATGGCCTCTAACTGGGCACATTACCAACAACCGTCTATGATGACGTGTTCACATTATCAAACGTCACCTGCGTATTATCAA	CGGTTCCCTTTCTTGCCTGAAATGCTCGTTCTAATGGAAAAAAAAAGAAATAAAGGTGGGCCTGCCCATTAGCAGGAAATTGGTACTTAATTATTGAAAAAAAAATTATTGGTTGCTAAGAGATTCGAACTCTTGCATCTTACGATACCTGAGTATTCCCACAGTTAACTGCGGTCAAGATATTTCTTGAATCAGGCGCCTTAGACCGCTCGGCCAAACAACCACTTATTTGTTGAAAGCGAGCGCGGTACAAGTAATGTTACCTCATCTGATATACAATAAAGGTGGAGCGCCAATATATACGCATTTGACTGTTCATAATTCATTGAATATAATTTATTCCTTGTTAGTACAAAAGGGTTAAACAGAAAAAGACGTGACGTTGTAACCGAGAGGATG…
1405	5306	0	0	51	51	NC_001135	122696	122889	NC_001139	857273	857825	|neigh_up CDS[fcd=-466](-,120944,122326) gene= CIT2 note= Cit2p; |neigh_down CDS[fcd=3936](-,126009,126728) note= Ycr007cp;	|gene note= GO_component: cytosol [goid 0005829] [evidence NAS] |neigh_up CDS[fcd=-1243](-,855269,856306) gene= RNR4 note= Rnr4p; |neigh_down CDS[fcd=743](+,858292,858609) gene= TIM13 note= Tim13p;	CGGATAAATGCGTCGAATGTGCGCGCTATTAGTTTGCGCTCTTTTGAGATACCGCCAAGCCATTGATTGAATGACCCAAGGACGGATTTGTTCAACACTCCAAAGCGGCTTATGTTGTGGCAACAACTCTGGGGAAAGTCAGCGCAATGTTTTCCCCTAAGGATTCGCGCGAGCCGTGTGTAACAAAGTTCCG	CGGTTCCCTTTCTTGCCTGAAATGCTCGTTCTAATGGAAAAAAAAAGAAATAAAGGTGGGCCTGCCCATTAGCAGGAAATTGGTACTTAATTATTGAAAAAAAAATTATTGGTTGCTAAGAGATTCGAACTCTTGCATCTTACGATACCTGAGTATTCCCACAGTTAACTGCGGTCAAGATATTTCTTGAATCAGGCGCCTTAGACCGCTCGGCCAAACAACCACTTATTTGTTGAAAGCGAGCGCGGTACAAGTAATGTTACCTCATCTGATATACAATAAAGGTGGAGCGCCAATATATACGCATTTGACTGTTCATAATTCATTGAATATAATTTATTCCTTGTTAGTACAAAAGGGTTAAACAGAAAAAGACGTGACGTTGTAACCGAGAGGATG…
1406	5306	3	3	0	0	NC_001135	122890	123582	NC_001139	857273	857825	|gene gene= SUF2 |tRNA gene= SUF2 note= GO_component: cytosol [goid 0005829] [evidence NAS] |neigh_up CDS[fcd=-910](-,120944,122326) gene= CIT2 note= Cit2p; |neigh_down CDS[fcd=3492](-,126009,126728) note= Ycr007cp;	|gene note= GO_component: cytosol [goid 0005829] [evidence NAS] |neigh_up CDS[fcd=-1243](-,855269,856306) gene= RNR4 note= Rnr4p; |neigh_down CDS[fcd=743](+,858292,858609) gene= TIM13 note= Tim13p;	CGGTATAGCATATCTAAACCACAGAAGGACGCTTATACGGCCGTCTTCCACAGTAATTAGAAGGACATTAGTCGGAGTGTAAATAAGACGGTTGCATACGCGTATGAACATGGGCCATTCATTTTACGGAAATGGCAACACATTTTCTTGTTTTTAATGTAAATAGTACGGAGTTCCTTTTTGGTGCGCTGAATGTATGCCGTAGTTTGGTTTCTTGCCAGGCGTGAGAAGAGAGGTCACACATGCTGTTGGGGTTCATGATTTTCAGCCTTCGCTCTGCTAAGTAAAAGGTCCATTGATCCGAAGCGCTTCCTCCAATATCGCAGTGATAAACGGTCATGTAAGCCTACAGTCTTTAAACTGTAGATGATTTAATGGATTATCTCATACATTGAATAT…	CGGTTCCCTTTCTTGCCTGAAATGCTCGTTCTAATGGAAAAAAAAAGAAATAAAGGTGGGCCTGCCCATTAGCAGGAAATTGGTACTTAATTATTGAAAAAAAAATTATTGGTTGCTAAGAGATTCGAACTCTTGCATCTTACGATACCTGAGTATTCCCACAGTTAACTGCGGTCAAGATATTTCTTGAATCAGGCGCCTTAGACCGCTCGGCCAAACAACCACTTATTTGTTGAAAGCGAGCGCGGTACAAGTAATGTTACCTCATCTGATATACAATAAAGGTGGAGCGCCAATATATACGCATTTGACTGTTCATAATTCATTGAATATAATTTATTCCTTGTTAGTACAAAAGGGTTAAACAGAAAAAGACGTGACGTTGTAACCGAGAGGATG…
1446	5306	1	1	0	0	NC_001135	163579	163734	NC_001139	857273	857825	|neigh_up CDS[fcd=-593](-,162941,163063) gene= PMP1 note= Pmp1p; |neigh_down CDS[fcd=2679](-,164107,166335) gene= NPP1 note= Npp1p;	|gene note= GO_component: cytosol [goid 0005829] [evidence NAS] |neigh_up CDS[fcd=-1243](-,855269,856306) gene= RNR4 note= Rnr4p; |neigh_down CDS[fcd=743](+,858292,858609) gene= TIM13 note= Tim13p;	CGGCTTTCCCAAAAAAGGAATTCCTGTCCAATGCAACGACAGCCATAGAAACAGCCGCGGTTGGGTGCGTGGGTGCGGTAATTTAACGATCATATGGTATGGGTGCACGTGGGATTCTAGGGGAAGTGCGCGCGGATACCGAATCGGCCATCGAA	CGGTTCCCTTTCTTGCCTGAAATGCTCGTTCTAATGGAAAAAAAAAGAAATAAAGGTGGGCCTGCCCATTAGCAGGAAATTGGTACTTAATTATTGAAAAAAAAATTATTGGTTGCTAAGAGATTCGAACTCTTGCATCTTACGATACCTGAGTATTCCCACAGTTAACTGCGGTCAAGATATTTCTTGAATCAGGCGCCTTAGACCGCTCGGCCAAACAACCACTTATTTGTTGAAAGCGAGCGCGGTACAAGTAATGTTACCTCATCTGATATACAATAAAGGTGGAGCGCCAATATATACGCATTTGACTGTTCATAATTCATTGAATATAATTTATTCCTTGTTAGTACAAAAGGGTTAAACAGAAAAAGACGTGACGTTGTAACCGAGAGGATG…
1453	5306	0	0	0	1	NC_001135	168327	168492	NC_001139	857273	857825	|gene |tRNA note= GO_component: cytosol [goid 0005829] [evidence NAS] |neigh_up CDS[fcd=-414](-,167366,167995) gene= RHB1 note= Rhb1p; |neigh_down CDS[fcd=4011](-,170882,172420) gene= FEN2 note= Fen2p;	|gene note= GO_component: cytosol [goid 0005829] [evidence NAS] |neigh_up CDS[fcd=-1243](-,855269,856306) gene= RNR4 note= Rnr4p; |neigh_down CDS[fcd=743](+,858292,858609) gene= TIM13 note= Tim13p;	CGGATCAAAACCGAAAGTGATAACCACTACACTATAGGACCAGGACTTCTTGTAATATTTTGTATCTCAAAATGAGGTATGTCAGTATGACAATACGTCATCCTAAACGTTCATAAAACACATATGAAACAACCTTATAACAAAACGAACAACATGAGATAAAAC	CGGTTCCCTTTCTTGCCTGAAATGCTCGTTCTAATGGAAAAAAAAAGAAATAAAGGTGGGCCTGCCCATTAGCAGGAAATTGGTACTTAATTATTGAAAAAAAAATTATTGGTTGCTAAGAGATTCGAACTCTTGCATCTTACGATACCTGAGTATTCCCACAGTTAACTGCGGTCAAGATATTTCTTGAATCAGGCGCCTTAGACCGCTCGGCCAAACAACCACTTATTTGTTGAAAGCGAGCGCGGTACAAGTAATGTTACCTCATCTGATATACAATAAAGGTGGAGCGCCAATATATACGCATTTGACTGTTCATAATTCATTGAATATAATTTATTCCTTGTTAGTACAAAAGGGTTAAACAGAAAAAGACGTGACGTTGTAACCGAGAGGATG…
1500	5306	0	0	3	3	NC_001135	210739	211220	NC_001139	857273	857825	|gene gene= BUD23 |CDS[fcd=562](-,210714,211541) gene= BUD23 note= Bud23p;	|gene note= GO_component: cytosol [goid 0005829] [evidence NAS] |neigh_up CDS[fcd=-1243](-,855269,856306) gene= RNR4 note= Rnr4p; |neigh_down CDS[fcd=743](+,858292,858609) gene= TIM13 note= Tim13p;	CGGTGAACTTGGAGTCCTTCGCAACTTTCCTCCCACGTCTTTTCATGAGCTCCTTCTTTCTTAGAATGAAACTCTTGGCAGACTCCTTGTCTTTGCCTCCCTTCAAGCGCTGGCGCAGTTGTTTCTTCAAGTTGACGTTCTCCTCGTCCATGGTCACACCGTCCAAATTCACCTGCTCCTCCCCCTGCGGTGGGGCCCCACTGCTCAACACAAGGTAGTACTTCTTATTCTTTTTAGACTCTGGGTCGTCCACCACAAGCCCGCCACTGAACCCTGCCACCTTGGCAGACTGCAGTATGTCGTCCACCTGGTCGTCGTTTTTCGGGTAGAACTGGGCCACAAATTTCCCTCCCTTCTTCAGTGCAGCATACAATGTGTTGAAAAACCTCATCAACCGCT…	CGGTTCCCTTTCTTGCCTGAAATGCTCGTTCTAATGGAAAAAAAAAGAAATAAAGGTGGGCCTGCCCATTAGCAGGAAATTGGTACTTAATTATTGAAAAAAAAATTATTGGTTGCTAAGAGATTCGAACTCTTGCATCTTACGATACCTGAGTATTCCCACAGTTAACTGCGGTCAAGATATTTCTTGAATCAGGCGCCTTAGACCGCTCGGCCAAACAACCACTTATTTGTTGAAAGCGAGCGCGGTACAAGTAATGTTACCTCATCTGATATACAATAAAGGTGGAGCGCCAATATATACGCATTTGACTGTTCATAATTCATTGAATATAATTTATTCCTTGTTAGTACAAAAGGGTTAAACAGAAAAAGACGTGACGTTGTAACCGAGAGGATG…
1525	5306	14	14	0	0	NC_001135	223510	223606	NC_001139	857273	857825	|gene gene= YIH1 |CDS[fcd=668](-,223450,224226) gene= YIH1 note= Yih1p;	|gene note= GO_component: cytosol [goid 0005829] [evidence NAS] |neigh_up CDS[fcd=-1243](-,855269,856306) gene= RNR4 note= Rnr4p; |neigh_down CDS[fcd=743](+,858292,858609) gene= TIM13 note= Tim13p;	CGGTCGGGACCTATGTGGGCACCGCCGAACCAACGGGCCACCACAACGATGACGTTCCACACATCCATGATGGTGATGAGGTGCAGCATTCTGGAG	CGGTTCCCTTTCTTGCCTGAAATGCTCGTTCTAATGGAAAAAAAAAGAAATAAAGGTGGGCCTGCCCATTAGCAGGAAATTGGTACTTAATTATTGAAAAAAAAATTATTGGTTGCTAAGAGATTCGAACTCTTGCATCTTACGATACCTGAGTATTCCCACAGTTAACTGCGGTCAAGATATTTCTTGAATCAGGCGCCTTAGACCGCTCGGCCAAACAACCACTTATTTGTTGAAAGCGAGCGCGGTACAAGTAATGTTACCTCATCTGATATACAATAAAGGTGGAGCGCCAATATATACGCATTTGACTGTTCATAATTCATTGAATATAATTTATTCCTTGTTAGTACAAAAGGGTTAAACAGAAAAAGACGTGACGTTGTAACCGAGAGGATG…
1526	5306	7	7	0	0	NC_001135	223607	223862	NC_001139	857273	857825	|gene gene= YIH1 |CDS[fcd=492](-,223450,224226) gene= YIH1 note= Yih1p;	|gene note= GO_component: cytosol [goid 0005829] [evidence NAS] |neigh_up CDS[fcd=-1243](-,855269,856306) gene= RNR4 note= Rnr4p; |neigh_down CDS[fcd=743](+,858292,858609) gene= TIM13 note= Tim13p;	CGGCGGCCGTTTCACCGTCATCATCGGAATCTTGATATGTTGCCGCAGAGCCATCCTGCTTGATTCGCCATGCACTCATGACATGGTTTGCCTTACGCATCTTGGAGTCGGTCTTCAGTAGGTCTAGCATGGCAAACGCTTGTTCCTCGGAGGTAACATGTGCTGCAAAGGCCATGAAAGTCGAGCCTCTATCAGTAATGGGGTCCGACGCGGTCCAGCCCTCGAAGGGGTCTGTGGGAATGTCACTCTGCTGGA	CGGTTCCCTTTCTTGCCTGAAATGCTCGTTCTAATGGAAAAAAAAAGAAATAAAGGTGGGCCTGCCCATTAGCAGGAAATTGGTACTTAATTATTGAAAAAAAAATTATTGGTTGCTAAGAGATTCGAACTCTTGCATCTTACGATACCTGAGTATTCCCACAGTTAACTGCGGTCAAGATATTTCTTGAATCAGGCGCCTTAGACCGCTCGGCCAAACAACCACTTATTTGTTGAAAGCGAGCGCGGTACAAGTAATGTTACCTCATCTGATATACAATAAAGGTGGAGCGCCAATATATACGCATTTGACTGTTCATAATTCATTGAATATAATTTATTCCTTGTTAGTACAAAAGGGTTAAACAGAAAAAGACGTGACGTTGTAACCGAGAGGATG…
1567	5306	0	0	4	4	NC_001135	249505	249590	NC_001139	857273	857825	|gene |CDS[fcd=495](-,249290,250042) note= Ycr076cp;	|gene note= GO_component: cytosol [goid 0005829] [evidence NAS] |neigh_up CDS[fcd=-1243](-,855269,856306) gene= RNR4 note= Rnr4p; |neigh_down CDS[fcd=743](+,858292,858609) gene= TIM13 note= Tim13p;	CGGATGGCTTGTGCCAACAGGATACAGATCACCATCCGCATACCCTCCTGCTGGGTTAGCGAAGCTCGGTTCAGTTACCGTAAGT	CGGTTCCCTTTCTTGCCTGAAATGCTCGTTCTAATGGAAAAAAAAAGAAATAAAGGTGGGCCTGCCCATTAGCAGGAAATTGGTACTTAATTATTGAAAAAAAAATTATTGGTTGCTAAGAGATTCGAACTCTTGCATCTTACGATACCTGAGTATTCCCACAGTTAACTGCGGTCAAGATATTTCTTGAATCAGGCGCCTTAGACCGCTCGGCCAAACAACCACTTATTTGTTGAAAGCGAGCGCGGTACAAGTAATGTTACCTCATCTGATATACAATAAAGGTGGAGCGCCAATATATACGCATTTGACTGTTCATAATTCATTGAATATAATTTATTCCTTGTTAGTACAAAAGGGTTAAACAGAAAAAGACGTGACGTTGTAACCGAGAGGATG…
1631	5306	0	0	0	1	NC_001136	15044	15824	NC_001139	857273	857825	|rep_origin note= ARS403 |neigh_up CDS[fcd=-2074](-,11657,13360) gene= HXT15 note= Hxt15p; |neigh_down CDS[fcd=770](+,16204,17226) gene= THI13 note= Thi13p;	|gene note= GO_component: cytosol [goid 0005829] [evidence NAS] |neigh_up CDS[fcd=-1243](-,855269,856306) gene= RNR4 note= Rnr4p; |neigh_down CDS[fcd=743](+,858292,858609) gene= TIM13 note= Tim13p;	CGGGAATCTTGTTGCCATAAGGTGCTTTTATGATATCAAACCAGGGGGGAGAATATTTGGGAAGTAATTGGGAAGTAATTGTATGTATTTCTAAAATTTTTGGATACTCAACTTTTAAATTCAAAATAGTTATATTTGTTATCGAAATGTAGTAGAAATATTCTAAGTAACCAATTTCAAAACTGCATCTATCTTTGGATAAACTGGTGTGATAAGATATACATTGAATGCTGATGTCCATCACACATATGTTTACACTGGCGTCGCTCTGTACCTATTTCAGAATAGATTAATGACAAAGTAAAAGTTCAATAGGCGGGCGGAAAAAATTAGAGATTCATTGAATCTCTAATTTATTTAAAGTTTATAAGTCGTTACATATTTTTCTATGGTAAGTTC…	CGGTTCCCTTTCTTGCCTGAAATGCTCGTTCTAATGGAAAAAAAAAGAAATAAAGGTGGGCCTGCCCATTAGCAGGAAATTGGTACTTAATTATTGAAAAAAAAATTATTGGTTGCTAAGAGATTCGAACTCTTGCATCTTACGATACCTGAGTATTCCCACAGTTAACTGCGGTCAAGATATTTCTTGAATCAGGCGCCTTAGACCGCTCGGCCAAACAACCACTTATTTGTTGAAAGCGAGCGCGGTACAAGTAATGTTACCTCATCTGATATACAATAAAGGTGGAGCGCCAATATATACGCATTTGACTGTTCATAATTCATTGAATATAATTTATTCCTTGTTAGTACAAAAGGGTTAAACAGAAAAAGACGTGACGTTGTAACCGAGAGGATG…
1657	5306	0	0	99	99	NC_001136	30590	30807	NC_001139	857273	857825	|gene gene= LRC1 |CDS[fcd=-41](+,30657,31829) gene= LRC1 note= Lrc1p;	|gene note= GO_component: cytosol [goid 0005829] [evidence NAS] |neigh_up CDS[fcd=-1243](-,855269,856306) gene= RNR4 note= Rnr4p; |neigh_down CDS[fcd=743](+,858292,858609) gene= TIM13 note= Tim13p;	CGGATAGGCATAAAATATGACTCGAGATAAGACCAACAAAGATAAGTACCTCGGTTTAGTTAAGCGATGTTAGGACTGAAAGGGTGTCTAACTATTCTTATTGGATACGTTATTGCTGTCTGTGCTTTGTTTTCCAGTAGGGGAAGAAATCCTTCATTAACTGATTGGGAAAAGTTAAAGGACCAGAAAATATCGGATATTGATAACTTTGGGTTGA	CGGTTCCCTTTCTTGCCTGAAATGCTCGTTCTAATGGAAAAAAAAAGAAATAAAGGTGGGCCTGCCCATTAGCAGGAAATTGGTACTTAATTATTGAAAAAAAAATTATTGGTTGCTAAGAGATTCGAACTCTTGCATCTTACGATACCTGAGTATTCCCACAGTTAACTGCGGTCAAGATATTTCTTGAATCAGGCGCCTTAGACCGCTCGGCCAAACAACCACTTATTTGTTGAAAGCGAGCGCGGTACAAGTAATGTTACCTCATCTGATATACAATAAAGGTGGAGCGCCAATATATACGCATTTGACTGTTCATAATTCATTGAATATAATTTATTCCTTGTTAGTACAAAAGGGTTAAACAGAAAAAGACGTGACGTTGTAACCGAGAGGATG…
1698	5306	0	0	3	3	NC_001136	60327	60601	NC_001139	857273	857825	|gene gene= HBT1 |CDS[fcd=-58](-,57266,60406) gene= HBT1 note= Hbt1p;	|gene note= GO_component: cytosol [goid 0005829] [evidence NAS] |neigh_up CDS[fcd=-1243](-,855269,856306) gene= RNR4 note= Rnr4p; |neigh_down CDS[fcd=743](+,858292,858609) gene= TIM13 note= Tim13p;	CGGGCTTACCACCAAACGAAAAATTATTTTGTTCTTCTTCGCCTTGACCATCTTTGGAAATGGACTCGTTCATATTCATATCTTGGGTTGGGTGATATTCTTGATAGCTCTCCACTGGGAAATCTTCACGGTGTTCGGTATTATTCTTATCTCTACAGTTACATATAAAAAAAGGTGTTTTTGAGTTAGTTAGTATTATATATTAATTTTCTTGAGGGGGTGGTATTATTAAAGAATTAAATTCAATATTATTACTATTAATTACACTAAGGTG	CGGTTCCCTTTCTTGCCTGAAATGCTCGTTCTAATGGAAAAAAAAAGAAATAAAGGTGGGCCTGCCCATTAGCAGGAAATTGGTACTTAATTATTGAAAAAAAAATTATTGGTTGCTAAGAGATTCGAACTCTTGCATCTTACGATACCTGAGTATTCCCACAGTTAACTGCGGTCAAGATATTTCTTGAATCAGGCGCCTTAGACCGCTCGGCCAAACAACCACTTATTTGTTGAAAGCGAGCGCGGTACAAGTAATGTTACCTCATCTGATATACAATAAAGGTGGAGCGCCAATATATACGCATTTGACTGTTCATAATTCATTGAATATAATTTATTCCTTGTTAGTACAAAAGGGTTAAACAGAAAAAGACGTGACGTTGTAACCGAGAGGATG…
1708	5306	0	0	2	2	NC_001136	63102	64045	NC_001139	857273	857825	|gene gene= CDC13 note= synonym: EST4 |CDS[fcd=1446](-,62245,65019) gene= CDC13 note= Cdc13p;	|gene note= GO_component: cytosol [goid 0005829] [evidence NAS] |neigh_up CDS[fcd=-1243](-,855269,856306) gene= RNR4 note= Rnr4p; |neigh_down CDS[fcd=743](+,858292,858609) gene= TIM13 note= Tim13p;	CGGCTCACATTCGCGCACAATGGCATTCAATTTGCCGTTGTACATTTTCACTTTTATATTCATCTTACAAACTATGCCGTATTGCGAAAGGTTTTCATCGCGGCCGTTCTGTAGATCTCTTAGCCCGTTGTTGAATATTTTTCTGAGCTTAGAGTCAAACGTTTCGAATTGGTTTTTGTACATGATGGCTTTGAAGCCCTCGTTCAGCTCTAACTTGTTCTCGTAATCTATTAGATATCTGTCGTAAAGATAGTTTTGGACGATATCGTTCTTGGTAAAATCGCTAAAGACAAAAGATATAAAGGCAGGTTTATCAAACGAGCAGGAGACTAGCATGCCAAACATTGTTATGTATTTGGTCTCAAAAGTGTCGAGTCCCAACTGACAGAATTCGATGGT…	CGGTTCCCTTTCTTGCCTGAAATGCTCGTTCTAATGGAAAAAAAAAGAAATAAAGGTGGGCCTGCCCATTAGCAGGAAATTGGTACTTAATTATTGAAAAAAAAATTATTGGTTGCTAAGAGATTCGAACTCTTGCATCTTACGATACCTGAGTATTCCCACAGTTAACTGCGGTCAAGATATTTCTTGAATCAGGCGCCTTAGACCGCTCGGCCAAACAACCACTTATTTGTTGAAAGCGAGCGCGGTACAAGTAATGTTACCTCATCTGATATACAATAAAGGTGGAGCGCCAATATATACGCATTTGACTGTTCATAATTCATTGAATATAATTTATTCCTTGTTAGTACAAAAGGGTTAAACAGAAAAAGACGTGACGTTGTAACCGAGAGGATG…
1741	5306	0	0	0	1	NC_001136	81604	83595	NC_001139	857273	857825	|gene |tRNA note= GO_component: cytosol [goid 0005829] [evidence NAS] |neigh_up CDS[fcd=-2186](-,79295,80413) note= Ydl211cp; |neigh_down CDS[fcd=1672](+,84271,85986) gene= UGA4 note= Uga4p;	|gene note= GO_component: cytosol [goid 0005829] [evidence NAS] |neigh_up CDS[fcd=-1243](-,855269,856306) gene= RNR4 note= Rnr4p; |neigh_down CDS[fcd=743](+,858292,858609) gene= TIM13 note= Tim13p;	CGGATCCTAACCTTTACTGGCCTGTTGACGTTATTTGTTACGGGCTCAGCCCATCTGAGTAAATTTGGCAATTGTGTTCAAGTCAACGCCTGGAATCATTCCCAGCGTTTTATTATGGACTGGGACTCTTGCAACTGTTCTACTGGCACAGTGGATTTATAGTGAACTGGATTTTTCAAAAATGGCTTCACTTTGAGAAACACTATTTACTATGTTTGTTAACTTCTTAACAGTGTGTATTACTTTTTTGCCATATTGATATTAAAAAAGTCATTTCGACTGCTGACAGAGAATACAACTAGTAACTGGAGAGATAGCTGGTGCAGTGAGTGATTCCACATAATGCCAGACTTCTACTCGTCAGCCAGTTCGATTGTTGAGGAAACATAGCAAAGCAGT…	CGGTTCCCTTTCTTGCCTGAAATGCTCGTTCTAATGGAAAAAAAAAGAAATAAAGGTGGGCCTGCCCATTAGCAGGAAATTGGTACTTAATTATTGAAAAAAAAATTATTGGTTGCTAAGAGATTCGAACTCTTGCATCTTACGATACCTGAGTATTCCCACAGTTAACTGCGGTCAAGATATTTCTTGAATCAGGCGCCTTAGACCGCTCGGCCAAACAACCACTTATTTGTTGAAAGCGAGCGCGGTACAAGTAATGTTACCTCATCTGATATACAATAAAGGTGGAGCGCCAATATATACGCATTTGACTGTTCATAATTCATTGAATATAATTTATTCCTTGTTAGTACAAAAGGGTTAAACAGAAAAAGACGTGACGTTGTAACCGAGAGGATG…
1748	5306	0	0	1	1	NC_001136	85838	87157	NC_001139	857273	857825	|gene gene= UGA4 |CDS(+,84271,85986) gene= UGA4 note= Uga4p; |rep_origin note= ARS405 |gene gene= CWC2 note= synonym: NTC40 |CDS(-,86208,87227) gene= CWC2 note= Cwc2p;	|gene note= GO_component: cytosol [goid 0005829] [evidence NAS] |neigh_up CDS[fcd=-1243](-,855269,856306) gene= RNR4 note= Rnr4p; |neigh_down CDS[fcd=743](+,858292,858609) gene= TIM13 note= Tim13p;	CGGTATCTGGATCCTTGCAGGTATCTACTACAAAGTTTACAAGAAGAAATACTACCACGGTCCAGCAACCAATTTGTCGGATGATGATTATACTGAAGCCGTTGGTGCTGATGTTATCGACACAATTATGTCCAAACAGGAACCATAAATGTTCAAACCTTTATAAAGATTTTATATTCAGAGTTTATAAGGTCTAGCTTATATAGTCAGTATTTTTAATTTAATTATATTATAGTTTATCCTATCTCACCGTTTTAGCTTGTTTTCTGCGCCCAAACATAAAAATCAAGAAGCGCGGATAATTTATGATCAGCTCAGCGGGAATGTTAATGGCAGATACTTAGAATTTGGTGGAAACGATTTTCTTCTCTAATCCTCATCAGAGGAGAGGTAATCGAG…	CGGTTCCCTTTCTTGCCTGAAATGCTCGTTCTAATGGAAAAAAAAAGAAATAAAGGTGGGCCTGCCCATTAGCAGGAAATTGGTACTTAATTATTGAAAAAAAAATTATTGGTTGCTAAGAGATTCGAACTCTTGCATCTTACGATACCTGAGTATTCCCACAGTTAACTGCGGTCAAGATATTTCTTGAATCAGGCGCCTTAGACCGCTCGGCCAAACAACCACTTATTTGTTGAAAGCGAGCGCGGTACAAGTAATGTTACCTCATCTGATATACAATAAAGGTGGAGCGCCAATATATACGCATTTGACTGTTCATAATTCATTGAATATAATTTATTCCTTGTTAGTACAAAAGGGTTAAACAGAAAAAGACGTGACGTTGTAACCGAGAGGATG…
1813	5306	1	1	2	2	NC_001136	138839	138873	NC_001139	857273	857825	|gene gene= PCL9 |CDS[fcd=-564](+,138292,139206) gene= PCL9 note= Pcl9p;	|gene note= GO_component: cytosol [goid 0005829] [evidence NAS] |neigh_up CDS[fcd=-1243](-,855269,856306) gene= RNR4 note= Rnr4p; |neigh_down CDS[fcd=743](+,858292,858609) gene= TIM13 note= Tim13p;	CGGCCAACTGAAAGAATATATAAATCATAGAAGA	CGGTTCCCTTTCTTGCCTGAAATGCTCGTTCTAATGGAAAAAAAAAGAAATAAAGGTGGGCCTGCCCATTAGCAGGAAATTGGTACTTAATTATTGAAAAAAAAATTATTGGTTGCTAAGAGATTCGAACTCTTGCATCTTACGATACCTGAGTATTCCCACAGTTAACTGCGGTCAAGATATTTCTTGAATCAGGCGCCTTAGACCGCTCGGCCAAACAACCACTTATTTGTTGAAAGCGAGCGCGGTACAAGTAATGTTACCTCATCTGATATACAATAAAGGTGGAGCGCCAATATATACGCATTTGACTGTTCATAATTCATTGAATATAATTTATTCCTTGTTAGTACAAAAGGGTTAAACAGAAAAAGACGTGACGTTGTAACCGAGAGGATG…
1827	5306	0	0	0	4	NC_001136	148882	150227	NC_001139	857273	857825	|gene |CDS(+,148192,149079) note= Ydl173wp; |gene gene= GLT1 |CDS(-,149204,155641) gene= GLT1 note= Glt1p;	|gene note= GO_component: cytosol [goid 0005829] [evidence NAS] |neigh_up CDS[fcd=-1243](-,855269,856306) gene= RNR4 note= Rnr4p; |neigh_down CDS[fcd=743](+,858292,858609) gene= TIM13 note= Tim13p;	CGGAAAAATTTGCTATTGGAAGAGGTGGCGCTGGAAACATAATTTCTCCAAAGTCAAGCAGGAACACTATCAACCATAACTTAAACGATGATGATGAAGATAAGTTTAATTTGAAAGATGACAATGGTAAAGAGAAGAAGAAGAAGAAGAAGAAGAAATCAGGGTTTTTCAGTTCTTTGAAAACTATGTTTAATTGAAATAACATTCATCAGCAAAATTAATAAACTAAATAAAATAAATAAATAAATAAATAAATAAATAAATAAATAAATAAATAAATAAATAATATACGATCATAAAATAAATAATAACTCAAGCTTTTTAGACTTGACTAGCTAATTCTTTCAATAGTTTGTAATCACGTTGAACGATACCACCATTACTTGGTAGATACGTAGT…	CGGTTCCCTTTCTTGCCTGAAATGCTCGTTCTAATGGAAAAAAAAAGAAATAAAGGTGGGCCTGCCCATTAGCAGGAAATTGGTACTTAATTATTGAAAAAAAAATTATTGGTTGCTAAGAGATTCGAACTCTTGCATCTTACGATACCTGAGTATTCCCACAGTTAACTGCGGTCAAGATATTTCTTGAATCAGGCGCCTTAGACCGCTCGGCCAAACAACCACTTATTTGTTGAAAGCGAGCGCGGTACAAGTAATGTTACCTCATCTGATATACAATAAAGGTGGAGCGCCAATATATACGCATTTGACTGTTCATAATTCATTGAATATAATTTATTCCTTGTTAGTACAAAAGGGTTAAACAGAAAAAGACGTGACGTTGTAACCGAGAGGATG…
1835	5306	0	0	18	18	NC_001136	155352	155523	NC_001139	857273	857825	|gene gene= GLT1 |CDS[fcd=204](-,149204,155641) gene= GLT1 note= Glt1p;	|gene note= GO_component: cytosol [goid 0005829] [evidence NAS] |neigh_up CDS[fcd=-1243](-,855269,856306) gene= RNR4 note= Rnr4p; |neigh_down CDS[fcd=743](+,858292,858609) gene= TIM13 note= Tim13p;	CGGCACCGTCACCGTTCCCATCAGATGAGACGGCACCACGATGTGTCATATTCACTAAAAGATATCTAGCGTCAGTAACAATCTTGTGAGACTGTTCACCATGCTTATTTGCTACGAAACCGACACCACAAGCGTCATGTTCATAATCAGGGTCGTAAAGTCCTCGTTTGT	CGGTTCCCTTTCTTGCCTGAAATGCTCGTTCTAATGGAAAAAAAAAGAAATAAAGGTGGGCCTGCCCATTAGCAGGAAATTGGTACTTAATTATTGAAAAAAAAATTATTGGTTGCTAAGAGATTCGAACTCTTGCATCTTACGATACCTGAGTATTCCCACAGTTAACTGCGGTCAAGATATTTCTTGAATCAGGCGCCTTAGACCGCTCGGCCAAACAACCACTTATTTGTTGAAAGCGAGCGCGGTACAAGTAATGTTACCTCATCTGATATACAATAAAGGTGGAGCGCCAATATATACGCATTTGACTGTTCATAATTCATTGAATATAATTTATTCCTTGTTAGTACAAAAGGGTTAAACAGAAAAAGACGTGACGTTGTAACCGAGAGGATG…
1994	5306	0	0	1	1	NC_001136	303670	303859	NC_001139	857273	857825	|gene gene= NDE2 note= synonym: NDH2 |CDS[fcd=-553](+,303211,304848) gene= NDE2 note= Nde2p;	|gene note= GO_component: cytosol [goid 0005829] [evidence NAS] |neigh_up CDS[fcd=-1243](-,855269,856306) gene= RNR4 note= Rnr4p; |neigh_down CDS[fcd=743](+,858292,858609) gene= TIM13 note= Tim13p;	CGGTTAGATCGATCGCTAGAAGAACGCCTGGAGAAGTTCACTACATTGAGGCGGAAGCGTTGGACGTTGATCCAAAGGCCAAAAAAGTAATGGTGCAATCGGTGTCAGAGGACGAATATTTCGTTTCGAGCTTAAGTTACGATTATCTTGTTGTTAGTGTAGGCGCTAAAACCACTACTTTTAACATTC	CGGTTCCCTTTCTTGCCTGAAATGCTCGTTCTAATGGAAAAAAAAAGAAATAAAGGTGGGCCTGCCCATTAGCAGGAAATTGGTACTTAATTATTGAAAAAAAAATTATTGGTTGCTAAGAGATTCGAACTCTTGCATCTTACGATACCTGAGTATTCCCACAGTTAACTGCGGTCAAGATATTTCTTGAATCAGGCGCCTTAGACCGCTCGGCCAAACAACCACTTATTTGTTGAAAGCGAGCGCGGTACAAGTAATGTTACCTCATCTGATATACAATAAAGGTGGAGCGCCAATATATACGCATTTGACTGTTCATAATTCATTGAATATAATTTATTCCTTGTTAGTACAAAAGGGTTAAACAGAAAAAGACGTGACGTTGTAACCGAGAGGATG…
2066	5306	7	7	0	0	NC_001136	368868	368908	NC_001139	857273	857825	|neigh_up CDS[fcd=-677](-,366739,368211) gene= STP4 note= Stp4p; |neigh_down CDS[fcd=881](+,369769,370704) gene= SIT4 note= Sit4p;	|gene note= GO_component: cytosol [goid 0005829] [evidence NAS] |neigh_up CDS[fcd=-1243](-,855269,856306) gene= RNR4 note= Rnr4p; |neigh_down CDS[fcd=743](+,858292,858609) gene= TIM13 note= Tim13p;	CGGATTTTATTTTCCTCAATGTGCTCGTGTAAGTGTCGGC	CGGTTCCCTTTCTTGCCTGAAATGCTCGTTCTAATGGAAAAAAAAAGAAATAAAGGTGGGCCTGCCCATTAGCAGGAAATTGGTACTTAATTATTGAAAAAAAAATTATTGGTTGCTAAGAGATTCGAACTCTTGCATCTTACGATACCTGAGTATTCCCACAGTTAACTGCGGTCAAGATATTTCTTGAATCAGGCGCCTTAGACCGCTCGGCCAAACAACCACTTATTTGTTGAAAGCGAGCGCGGTACAAGTAATGTTACCTCATCTGATATACAATAAAGGTGGAGCGCCAATATATACGCATTTGACTGTTCATAATTCATTGAATATAATTTATTCCTTGTTAGTACAAAAGGGTTAAACAGAAAAAGACGTGACGTTGTAACCGAGAGGATG…
2104	5306	2	2	0	0	NC_001136	394551	394760	NC_001139	857273	857825	|gene gene= DBP10 |CDS[fcd=-441](+,394214,397201) gene= DBP10 note= Dbp10p;	|gene note= GO_component: cytosol [goid 0005829] [evidence NAS] |neigh_up CDS[fcd=-1243](-,855269,856306) gene= RNR4 note= Rnr4p; |neigh_down CDS[fcd=743](+,858292,858609) gene= TIM13 note= Tim13p;	CGGTGATGATGAGGATGATGTCAATGAATATTTCTCCACAAATAACTTGGAGAAAACAAAGCATAAAAAAGGTAGTTTTCCCAGCTTTGGCCTATCCAAAATTGTATTGAACAATATTAAAAGGAAGGGATTTCGCCAACCCACTCCTATTCAAAGGAAGACTATCCCATTAATTTTGCAAAGTAGGGATATTGTTGGTATGGCACGTA	CGGTTCCCTTTCTTGCCTGAAATGCTCGTTCTAATGGAAAAAAAAAGAAATAAAGGTGGGCCTGCCCATTAGCAGGAAATTGGTACTTAATTATTGAAAAAAAAATTATTGGTTGCTAAGAGATTCGAACTCTTGCATCTTACGATACCTGAGTATTCCCACAGTTAACTGCGGTCAAGATATTTCTTGAATCAGGCGCCTTAGACCGCTCGGCCAAACAACCACTTATTTGTTGAAAGCGAGCGCGGTACAAGTAATGTTACCTCATCTGATATACAATAAAGGTGGAGCGCCAATATATACGCATTTGACTGTTCATAATTCATTGAATATAATTTATTCCTTGTTAGTACAAAAGGGTTAAACAGAAAAAGACGTGACGTTGTAACCGAGAGGATG…
2182	5306	0	0	3	3	NC_001136	463115	463460	NC_001139	857273	857825	|rep_origin note= ARS1 |gene gene= GAL3 |CDS[fcd=144](+,463431,464993) gene= GAL3 note= Gal3p;	|gene note= GO_component: cytosol [goid 0005829] [evidence NAS] |neigh_up CDS[fcd=-1243](-,855269,856306) gene= RNR4 note= Rnr4p; |neigh_down CDS[fcd=743](+,858292,858609) gene= TIM13 note= Tim13p;	CGGACCCTAGTGCACTTACCCCACGTTCGGTCCACTGTGTGCCGAACATGCTCCTTCACTATTTTAACATGTGGAATTCTTGAAAGAATGAAATCGCCATGCCAAGCCATCACACGGTCTTTTATGCAATTGATTGACCGCCTGCAACACATAGGCAGTAAAATTTTTACTGAAACGTATATAATCATCATAAGCGACAAGTGAGGCAACACCTTTGTTACCACATTGACAACCCCAGGTATTCATACTTCCTATTAGCGGAATCAGGAGTGCAAAAAGAGAAAATAAAAGTAAAAAGGTAGGGCAACACATAGTATGAATACAAACGTTCCAATATTCAGTTCT	CGGTTCCCTTTCTTGCCTGAAATGCTCGTTCTAATGGAAAAAAAAAGAAATAAAGGTGGGCCTGCCCATTAGCAGGAAATTGGTACTTAATTATTGAAAAAAAAATTATTGGTTGCTAAGAGATTCGAACTCTTGCATCTTACGATACCTGAGTATTCCCACAGTTAACTGCGGTCAAGATATTTCTTGAATCAGGCGCCTTAGACCGCTCGGCCAAACAACCACTTATTTGTTGAAAGCGAGCGCGGTACAAGTAATGTTACCTCATCTGATATACAATAAAGGTGGAGCGCCAATATATACGCATTTGACTGTTCATAATTCATTGAATATAATTTATTCCTTGTTAGTACAAAAGGGTTAAACAGAAAAAGACGTGACGTTGTAACCGAGAGGATG…
2193	5306	0	0	0	1	NC_001136	472049	472093	NC_001139	857273	857825	|gene gene= RPL4B |CDS[fcd=-221](+,471850,472938) gene= RPL4B note= Rpl4bp;	|gene note= GO_component: cytosol [goid 0005829] [evidence NAS] |neigh_up CDS[fcd=-1243](-,855269,856306) gene= RNR4 note= Rnr4p; |neigh_down CDS[fcd=743](+,858292,858609) gene= TIM13 note= Tim13p;	CGGTCGTGCCGTCGCTCGTATTCCAAGAGTTGGTGGTGGTGGTA	CGGTTCCCTTTCTTGCCTGAAATGCTCGTTCTAATGGAAAAAAAAAGAAATAAAGGTGGGCCTGCCCATTAGCAGGAAATTGGTACTTAATTATTGAAAAAAAAATTATTGGTTGCTAAGAGATTCGAACTCTTGCATCTTACGATACCTGAGTATTCCCACAGTTAACTGCGGTCAAGATATTTCTTGAATCAGGCGCCTTAGACCGCTCGGCCAAACAACCACTTATTTGTTGAAAGCGAGCGCGGTACAAGTAATGTTACCTCATCTGATATACAATAAAGGTGGAGCGCCAATATATACGCATTTGACTGTTCATAATTCATTGAATATAATTTATTCCTTGTTAGTACAAAAGGGTTAAACAGAAAAAGACGTGACGTTGTAACCGAGAGGATG…
2236	5306	0	1	0	0	NC_001136	518981	519229	NC_001139	857273	857825	|repeat_region note= Transposon YDRCTY2-1; Long Terminal Repeat (LTR) |gene note= Ydr034c-dp; |gene |CDS[fcd=248](-,518037,519353) note= Ydr034c-cp;	|gene note= GO_component: cytosol [goid 0005829] [evidence NAS] |neigh_up CDS[fcd=-1243](-,855269,856306) gene= RNR4 note= Rnr4p; |neigh_down CDS[fcd=743](+,858292,858609) gene= TIM13 note= Tim13p;	CGGTTGATAATACGCAGGTGACGTTTGATAATGTGAACACGTCATCATAGATGGTTGTTGGTAATGTGCCCAGTTAGAGGCCATAGCTTTGTTTGGGGTCATCATGCCGTGCTGTTGGTACTGTCCATTCTGTGGAGGTGGTACTGAAGCAGGTTGAGGAGAGACATGATGATGGTTCTCTGGAACAGCTGATGTCCCAGGTGTTGTCTCTTGTTGAGAATTAACCTTAGTGGAATCTCTATCAAATT	CGGTTCCCTTTCTTGCCTGAAATGCTCGTTCTAATGGAAAAAAAAAGAAATAAAGGTGGGCCTGCCCATTAGCAGGAAATTGGTACTTAATTATTGAAAAAAAAATTATTGGTTGCTAAGAGATTCGAACTCTTGCATCTTACGATACCTGAGTATTCCCACAGTTAACTGCGGTCAAGATATTTCTTGAATCAGGCGCCTTAGACCGCTCGGCCAAACAACCACTTATTTGTTGAAAGCGAGCGCGGTACAAGTAATGTTACCTCATCTGATATACAATAAAGGTGGAGCGCCAATATATACGCATTTGACTGTTCATAATTCATTGAATATAATTTATTCCTTGTTAGTACAAAAGGGTTAAACAGAAAAAGACGTGACGTTGTAACCGAGAGGATG…
2249	5306	0	0	0	2	NC_001136	526883	527663	NC_001139	857273	857825	|gene gene= KRS1 note= synonym: GCD5 |CDS(+,525437,527212) gene= KRS1 note= Krs1p; |gene gene= ENA5 |CDS(-,527419,530694) gene= ENA5 note= Ena5p;	|gene note= GO_component: cytosol [goid 0005829] [evidence NAS] |neigh_up CDS[fcd=-1243](-,855269,856306) gene= RNR4 note= Rnr4p; |neigh_down CDS[fcd=743](+,858292,858609) gene= TIM13 note= Tim13p;	CGGGTCTATGTGAGCGTTTCGAGGTCTTTGTAGCTACAAAGGAAATTTGTAATGCCTACACTGAATTGAACGATCCATTTGACCAAAGGGCACGTTTCGAAGAACAAGCTAGACAAAAGGATCAAGGTGATGACGAAGCTCAATTAGTCGATGAAACCTTCTGTAATGCTCTAGAATACGGTTTACCACCAACTGGTGGTTGGGGTTGTGGTATTGATAGACTGGCCATGTTCTTGACCGACTCCAACACCATTAGAGAAGTCTTATTGTTCCCAACTTTGAAGCCTGATGTTTTGAGAGAGGAAGTCAAAAAGGAAGAAGAAAATTAAGCTAAAAGATATTAGAACATATTGTATAATGTAAGTATTATTATTCTAAGATAGAGCTTGAATATGAAAA…	CGGTTCCCTTTCTTGCCTGAAATGCTCGTTCTAATGGAAAAAAAAAGAAATAAAGGTGGGCCTGCCCATTAGCAGGAAATTGGTACTTAATTATTGAAAAAAAAATTATTGGTTGCTAAGAGATTCGAACTCTTGCATCTTACGATACCTGAGTATTCCCACAGTTAACTGCGGTCAAGATATTTCTTGAATCAGGCGCCTTAGACCGCTCGGCCAAACAACCACTTATTTGTTGAAAGCGAGCGCGGTACAAGTAATGTTACCTCATCTGATATACAATAAAGGTGGAGCGCCAATATATACGCATTTGACTGTTCATAATTCATTGAATATAATTTATTCCTTGTTAGTACAAAAGGGTTAAACAGAAAAAGACGTGACGTTGTAACCGAGAGGATG…
2256	5306	0	0	0	4	NC_001136	531402	531548	NC_001139	857273	857825	|gene gene= ENA2 |CDS[fcd=3104](-,531304,534579) gene= ENA2 note= Ena2p;	|gene note= GO_component: cytosol [goid 0005829] [evidence NAS] |neigh_up CDS[fcd=-1243](-,855269,856306) gene= RNR4 note= Rnr4p; |neigh_down CDS[fcd=743](+,858292,858609) gene= TIM13 note= Tim13p;	CGGGTTGTGCGCTCTCTGAGTTTTGAAATAGCGCCTCTTTCCACACTTGTAAAGTTCAGCACCTATCCAGAATGCAATTGTGAATGCAATGGCGAGACCCCATTCAGCACCAATTGGTTTATGCAAAAACACTTTATCATTAATAA	CGGTTCCCTTTCTTGCCTGAAATGCTCGTTCTAATGGAAAAAAAAAGAAATAAAGGTGGGCCTGCCCATTAGCAGGAAATTGGTACTTAATTATTGAAAAAAAAATTATTGGTTGCTAAGAGATTCGAACTCTTGCATCTTACGATACCTGAGTATTCCCACAGTTAACTGCGGTCAAGATATTTCTTGAATCAGGCGCCTTAGACCGCTCGGCCAAACAACCACTTATTTGTTGAAAGCGAGCGCGGTACAAGTAATGTTACCTCATCTGATATACAATAAAGGTGGAGCGCCAATATATACGCATTTGACTGTTCATAATTCATTGAATATAATTTATTCCTTGTTAGTACAAAAGGGTTAAACAGAAAAAGACGTGACGTTGTAACCGAGAGGATG…
2263	5306	0	0	0	3	NC_001136	535287	535433	NC_001139	857273	857825	|gene gene= ENA1 note= synonyms: PMR2, HOR6 |CDS[fcd=3104](-,535189,538464) gene= ENA1 note= Ena1p;	|gene note= GO_component: cytosol [goid 0005829] [evidence NAS] |neigh_up CDS[fcd=-1243](-,855269,856306) gene= RNR4 note= Rnr4p; |neigh_down CDS[fcd=743](+,858292,858609) gene= TIM13 note= Tim13p;	CGGGTTGTGCGCTCTCTGAGTTTTGAAATAGCGCCTCTTTCCACACTTGTAAAGTTCAGCACCTATCCAGAATGCAATTGTGAATGCAATGGCGAGACCCCATTCAGCACCAATTGGTTTATGCAAAAACACTTTATCATTAATAA	CGGTTCCCTTTCTTGCCTGAAATGCTCGTTCTAATGGAAAAAAAAAGAAATAAAGGTGGGCCTGCCCATTAGCAGGAAATTGGTACTTAATTATTGAAAAAAAAATTATTGGTTGCTAAGAGATTCGAACTCTTGCATCTTACGATACCTGAGTATTCCCACAGTTAACTGCGGTCAAGATATTTCTTGAATCAGGCGCCTTAGACCGCTCGGCCAAACAACCACTTATTTGTTGAAAGCGAGCGCGGTACAAGTAATGTTACCTCATCTGATATACAATAAAGGTGGAGCGCCAATATATACGCATTTGACTGTTCATAATTCATTGAATATAATTTATTCCTTGTTAGTACAAAAGGGTTAAACAGAAAAAGACGTGACGTTGTAACCGAGAGGATG…
2365	5306	0	0	27	27	NC_001136	630878	630938	NC_001139	857273	857825	|neigh_up CDS[fcd=-2377](-,626705,628531) gene= RLI1 note= Rli1p; |neigh_down CDS[fcd=371](+,631279,636117) gene= DNF2 note= Dnf2p;	|gene note= GO_component: cytosol [goid 0005829] [evidence NAS] |neigh_up CDS[fcd=-1243](-,855269,856306) gene= RNR4 note= Rnr4p; |neigh_down CDS[fcd=743](+,858292,858609) gene= TIM13 note= Tim13p;	CGGGATCGACCGTCCTACACTAATGTAAGCATTAGTCCGCTCGAGGGTCCACGTTTAATT	CGGTTCCCTTTCTTGCCTGAAATGCTCGTTCTAATGGAAAAAAAAAGAAATAAAGGTGGGCCTGCCCATTAGCAGGAAATTGGTACTTAATTATTGAAAAAAAAATTATTGGTTGCTAAGAGATTCGAACTCTTGCATCTTACGATACCTGAGTATTCCCACAGTTAACTGCGGTCAAGATATTTCTTGAATCAGGCGCCTTAGACCGCTCGGCCAAACAACCACTTATTTGTTGAAAGCGAGCGCGGTACAAGTAATGTTACCTCATCTGATATACAATAAAGGTGGAGCGCCAATATATACGCATTTGACTGTTCATAATTCATTGAATATAATTTATTCCTTGTTAGTACAAAAGGGTTAAACAGAAAAAGACGTGACGTTGTAACCGAGAGGATG…
2385	5306	12	12	0	0	NC_001136	644441	644583	NC_001139	857273	857825	|gene gene= GRX3 |CDS[fcd=520](-,644175,645032) gene= GRX3 note= Grx3p;	|gene note= GO_component: cytosol [goid 0005829] [evidence NAS] |neigh_up CDS[fcd=-1243](-,855269,856306) gene= RNR4 note= Rnr4p; |neigh_down CDS[fcd=743](+,858292,858609) gene= TIM13 note= Tim13p;	CGGCGCGGCATTGACCAATTTAGTCAATCTAGCGTTTATTTGCTCCTCAGTTTCTTCTTCCTCTTCTTCGTCGTCATCGTCTTCATCATTATGACTCCCCTCATTTACGTTTGCATTTTCCATAGTATGAGTTTGTGATGAT	CGGTTCCCTTTCTTGCCTGAAATGCTCGTTCTAATGGAAAAAAAAAGAAATAAAGGTGGGCCTGCCCATTAGCAGGAAATTGGTACTTAATTATTGAAAAAAAAATTATTGGTTGCTAAGAGATTCGAACTCTTGCATCTTACGATACCTGAGTATTCCCACAGTTAACTGCGGTCAAGATATTTCTTGAATCAGGCGCCTTAGACCGCTCGGCCAAACAACCACTTATTTGTTGAAAGCGAGCGCGGTACAAGTAATGTTACCTCATCTGATATACAATAAAGGTGGAGCGCCAATATATACGCATTTGACTGTTCATAATTCATTGAATATAATTTATTCCTTGTTAGTACAAAAGGGTTAAACAGAAAAAGACGTGACGTTGTAACCGAGAGGATG…
2447	5306	2	2	0	0	NC_001136	700747	701475	NC_001139	857273	857825	|gene |CDS(+,700312,701286) note= Ydr124wp; |gene gene= ECM18 |CDS(-,701394,702755) gene= ECM18 note= Ecm18p;	|gene note= GO_component: cytosol [goid 0005829] [evidence NAS] |neigh_up CDS[fcd=-1243](-,855269,856306) gene= RNR4 note= Rnr4p; |neigh_down CDS[fcd=743](+,858292,858609) gene= TIM13 note= Tim13p;	CGGACCACCTCCAGAAAGCGGATCGACTGAAATTGATGTGCACGATAATTATGAATGTTCTACCGCAATCTCCCTTCAGCCTTGAGATTTTGGACGAGCTTACAGGAGTGACCGCCGCAATGACCATTTTTAAGAAAGAAACTGTGAAGAAAGTAATCATGAAAAATGTTTTCGAAATTGCGAAATGCTTGTGCAACAAAGATTTCAAGCAGAAGACCATATCACTTGATGATTTAAATGACCTAGCCCAAAAACAGAAAAAATCATACCATAGTCGTCGATTTGATGTAAATAAAATGGTTAAGGTAGAAAAAGATTTGTTACAACAGTCAAGTGGAAGCGATTCTTCACCCTCGATGATCCTTCCTTCAAAAGAAAGTGACACAGAGTATTTCCCCA…	CGGTTCCCTTTCTTGCCTGAAATGCTCGTTCTAATGGAAAAAAAAAGAAATAAAGGTGGGCCTGCCCATTAGCAGGAAATTGGTACTTAATTATTGAAAAAAAAATTATTGGTTGCTAAGAGATTCGAACTCTTGCATCTTACGATACCTGAGTATTCCCACAGTTAACTGCGGTCAAGATATTTCTTGAATCAGGCGCCTTAGACCGCTCGGCCAAACAACCACTTATTTGTTGAAAGCGAGCGCGGTACAAGTAATGTTACCTCATCTGATATACAATAAAGGTGGAGCGCCAATATATACGCATTTGACTGTTCATAATTCATTGAATATAATTTATTCCTTGTTAGTACAAAAGGGTTAAACAGAAAAAGACGTGACGTTGTAACCGAGAGGATG…
2458	5306	7	7	0	0	NC_001136	712471	712971	NC_001139	857273	857825	|gene |CDS[fcd=-3175](+,709546,712992) note= Ydr128wp;	|gene note= GO_component: cytosol [goid 0005829] [evidence NAS] |neigh_up CDS[fcd=-1243](-,855269,856306) gene= RNR4 note= Rnr4p; |neigh_down CDS[fcd=743](+,858292,858609) gene= TIM13 note= Tim13p;	CGGCCCAAAAGCAGGGCAGCCGTGCCATTTCATCCAGCCCTTTTCATAGTAGAATGCCTGACATCAAAGTCGAGCTTTTACATGACGATATTATAGAAGCTTATGAACAAGAAGACCTCTTACATTTAGAGGTATCAGACATACCAAAGTTCCAAACTTATATTTATCAATATTCAAAGTTACTTTTTAGATGGGGACTGCCTTTAGAAAGGGTCAAAATTCTAAAAGTTAGTACTGATTTCAGAAGTTCTTATAGTTCCCAAGGCATCCCCCCTAACAATAACAAGAAAAGTCCTTACAATGGTGTACTTACGCACTGGATCGAGAACAACGAGTTTGGAGAAGAAAAATTCCTAGCCCGAAATTGTAATTACTGTGATTTAAGAGTGACAAGAAGTA…	CGGTTCCCTTTCTTGCCTGAAATGCTCGTTCTAATGGAAAAAAAAAGAAATAAAGGTGGGCCTGCCCATTAGCAGGAAATTGGTACTTAATTATTGAAAAAAAAATTATTGGTTGCTAAGAGATTCGAACTCTTGCATCTTACGATACCTGAGTATTCCCACAGTTAACTGCGGTCAAGATATTTCTTGAATCAGGCGCCTTAGACCGCTCGGCCAAACAACCACTTATTTGTTGAAAGCGAGCGCGGTACAAGTAATGTTACCTCATCTGATATACAATAAAGGTGGAGCGCCAATATATACGCATTTGACTGTTCATAATTCATTGAATATAATTTATTCCTTGTTAGTACAAAAGGGTTAAACAGAAAAAGACGTGACGTTGTAACCGAGAGGATG…
2505	5306	0	0	1	1	NC_001136	751096	751461	NC_001139	857273	857825	|neigh_up CDS[fcd=-539](-,748610,750739) gene= SWI5 note= Swi5p; |neigh_down CDS[fcd=350](+,751628,753232) gene= EKI1 note= Eki1p;	|gene note= GO_component: cytosol [goid 0005829] [evidence NAS] |neigh_up CDS[fcd=-1243](-,855269,856306) gene= RNR4 note= Rnr4p; |neigh_down CDS[fcd=743](+,858292,858609) gene= TIM13 note= Tim13p;	CGGATTGGGATTCAGACCAAGATATTTCCAACAATGCTGCTATGAATTGGAACAGAGATGTTCTAATGAATATTTAACAAGGTGTGAGCGGAGTGTACCACTCCTATCGGCTTTCAGATAATCATACTACCTTTCAGAATATCTAACAATAACACTCCGATATTTGATTCGCTCTCCTTTAAGACAGAAATAACATTGGCCCTAGAATCCAATGCCGTAAATATCTACTTGACACCATTTAATGAAAGAACTGTCTGACTGCCGAAGTTTTATAAGTAGTTTGACTATGTTTCATAAGTTAGGCCACTAGACAGCATGTGAAAACGGTGATGATAGTAAAAAAATATCGTTTGGGTTTTGGCTAC	CGGTTCCCTTTCTTGCCTGAAATGCTCGTTCTAATGGAAAAAAAAAGAAATAAAGGTGGGCCTGCCCATTAGCAGGAAATTGGTACTTAATTATTGAAAAAAAAATTATTGGTTGCTAAGAGATTCGAACTCTTGCATCTTACGATACCTGAGTATTCCCACAGTTAACTGCGGTCAAGATATTTCTTGAATCAGGCGCCTTAGACCGCTCGGCCAAACAACCACTTATTTGTTGAAAGCGAGCGCGGTACAAGTAATGTTACCTCATCTGATATACAATAAAGGTGGAGCGCCAATATATACGCATTTGACTGTTCATAATTCATTGAATATAATTTATTCCTTGTTAGTACAAAAGGGTTAAACAGAAAAAGACGTGACGTTGTAACCGAGAGGATG…
2520	5306	0	0	2	2	NC_001136	768783	768878	NC_001139	857273	857825	|gene gene= CPR1 note= synonyms: CPH1, CYP1 |CDS[fcd=167](-,768509,768997) gene= CPR1 note= Cpr1p;	|gene note= GO_component: cytosol [goid 0005829] [evidence NAS] |neigh_up CDS[fcd=-1243](-,855269,856306) gene= RNR4 note= Rnr4p; |neigh_down CDS[fcd=743](+,858292,858609) gene= TIM13 note= Tim13p;	CGGTACCGTTACCAGCAGTGAAGTCACCACCTTGCAACATGAAGTCTGGAATAACTCTGTGGAATGGAGAGCCAGCGTAGCCGAATCCCTTTTCA	CGGTTCCCTTTCTTGCCTGAAATGCTCGTTCTAATGGAAAAAAAAAGAAATAAAGGTGGGCCTGCCCATTAGCAGGAAATTGGTACTTAATTATTGAAAAAAAAATTATTGGTTGCTAAGAGATTCGAACTCTTGCATCTTACGATACCTGAGTATTCCCACAGTTAACTGCGGTCAAGATATTTCTTGAATCAGGCGCCTTAGACCGCTCGGCCAAACAACCACTTATTTGTTGAAAGCGAGCGCGGTACAAGTAATGTTACCTCATCTGATATACAATAAAGGTGGAGCGCCAATATATACGCATTTGACTGTTCATAATTCATTGAATATAATTTATTCCTTGTTAGTACAAAAGGGTTAAACAGAAAAAGACGTGACGTTGTAACCGAGAGGATG…
2523	5306	1	1	0	0	NC_001136	770091	770111	NC_001139	857273	857825	|neigh_up CDS[fcd=-579](+,769522,769935) gene= RPA14 note= Rpa14p; |neigh_down CDS[fcd=253](+,770354,771451) gene= HOM2 note= Hom2p;	|gene note= GO_component: cytosol [goid 0005829] [evidence NAS] |neigh_up CDS[fcd=-1243](-,855269,856306) gene= RNR4 note= Rnr4p; |neigh_down CDS[fcd=743](+,858292,858609) gene= TIM13 note= Tim13p;	CGGCAGCGGCCTCAAAGTAC	CGGTTCCCTTTCTTGCCTGAAATGCTCGTTCTAATGGAAAAAAAAAGAAATAAAGGTGGGCCTGCCCATTAGCAGGAAATTGGTACTTAATTATTGAAAAAAAAATTATTGGTTGCTAAGAGATTCGAACTCTTGCATCTTACGATACCTGAGTATTCCCACAGTTAACTGCGGTCAAGATATTTCTTGAATCAGGCGCCTTAGACCGCTCGGCCAAACAACCACTTATTTGTTGAAAGCGAGCGCGGTACAAGTAATGTTACCTCATCTGATATACAATAAAGGTGGAGCGCCAATATATACGCATTTGACTGTTCATAATTCATTGAATATAATTTATTCCTTGTTAGTACAAAAGGGTTAAACAGAAAAAGACGTGACGTTGTAACCGAGAGGATG…
2529	5306	0	0	46	46	NC_001136	777088	777498	NC_001139	857273	857825	|gene gene= SSY1 note= synonym: SHR10 |CDS[fcd=-1133](+,776160,778718) gene= SSY1 note= Ssy1p;	|gene note= GO_component: cytosol [goid 0005829] [evidence NAS] |neigh_up CDS[fcd=-1243](-,855269,856306) gene= RNR4 note= Rnr4p; |neigh_down CDS[fcd=743](+,858292,858609) gene= TIM13 note= Tim13p;	CGGGCCATTTGGTACACTACTTGGGTTTGGACTCACAGGTAGCATCATTTTAGCCACAATGCTGTCATTTACAGAGTTATCCACCCTTATTCCTGTGTCTTCTGGGTTCTCAGGACTGGCTTCTAGATTTGTAGAGGATGCTTTCGGATTTGCATTGGGCTGGACGTATTGGATTTCCTGTATGCTTGCTCTTCCTGCCCAAGTTTCCTCAAGTACATTCTATCTCAGCTATTATAATAATGTCAATATATCAAAGGGAGTAACAGCAGGGTTTATCACGCTGTTTTCTGCATTTAGCATTGTAGTAAATTTACTGGATGTCAGCATAATGGGTGAAATTGTATATGTTGCTGGAATAAGCAAAGTGATAATTGCAATTTTGATGGTTTTCACGATGAT…	CGGTTCCCTTTCTTGCCTGAAATGCTCGTTCTAATGGAAAAAAAAAGAAATAAAGGTGGGCCTGCCCATTAGCAGGAAATTGGTACTTAATTATTGAAAAAAAAATTATTGGTTGCTAAGAGATTCGAACTCTTGCATCTTACGATACCTGAGTATTCCCACAGTTAACTGCGGTCAAGATATTTCTTGAATCAGGCGCCTTAGACCGCTCGGCCAAACAACCACTTATTTGTTGAAAGCGAGCGCGGTACAAGTAATGTTACCTCATCTGATATACAATAAAGGTGGAGCGCCAATATATACGCATTTGACTGTTCATAATTCATTGAATATAATTTATTCCTTGTTAGTACAAAAGGGTTAAACAGAAAAAGACGTGACGTTGTAACCGAGAGGATG…
2607	5306	10	10	0	0	NC_001136	847480	847560	NC_001139	857273	857825	|gene gene= MSS116 |CDS[fcd=423](-,845949,847943) gene= MSS116 note= Mss116p;	|gene note= GO_component: cytosol [goid 0005829] [evidence NAS] |neigh_up CDS[fcd=-1243](-,855269,856306) gene= RNR4 note= Rnr4p; |neigh_down CDS[fcd=743](+,858292,858609) gene= TIM13 note= Tim13p;	CGGTTTTAGCTCTTGCGATAACATCATGGTCTTCACTGGATAATATTGGTTTGATAGTCTTTTGCTGTACAGGAGTTAAA	CGGTTCCCTTTCTTGCCTGAAATGCTCGTTCTAATGGAAAAAAAAAGAAATAAAGGTGGGCCTGCCCATTAGCAGGAAATTGGTACTTAATTATTGAAAAAAAAATTATTGGTTGCTAAGAGATTCGAACTCTTGCATCTTACGATACCTGAGTATTCCCACAGTTAACTGCGGTCAAGATATTTCTTGAATCAGGCGCCTTAGACCGCTCGGCCAAACAACCACTTATTTGTTGAAAGCGAGCGCGGTACAAGTAATGTTACCTCATCTGATATACAATAAAGGTGGAGCGCCAATATATACGCATTTGACTGTTCATAATTCATTGAATATAATTTATTCCTTGTTAGTACAAAAGGGTTAAACAGAAAAAGACGTGACGTTGTAACCGAGAGGATG…
2677	5306	0	0	2	2	NC_001136	924036	926392	NC_001139	857273	857825	|gene gene= IVY1 |CDS(+,924781,926142) gene= IVY1 note= Ivy1p; |gene gene= COX20 |CDS(-,926289,926906) gene= COX20 note= Cox20p;	|gene note= GO_component: cytosol [goid 0005829] [evidence NAS] |neigh_up CDS[fcd=-1243](-,855269,856306) gene= RNR4 note= Rnr4p; |neigh_down CDS[fcd=743](+,858292,858609) gene= TIM13 note= Tim13p;	CGGGTAAACTAAAACTTAGATGCACTAGGTAATACCATTTGGTGATAAAGGGAATAAAAAGCAGCAAATCCTAGCTCAATTACGAAACTCTGATCACTTGGGGCCCAGCTTCATTGGCTAAATTGGTGTATCCCTTGAACCGACTACGTAAGTACGTTTTGAAAAGTGTGTAAATCTATGTATAAAAGTACATCAAAAATTAGACTGAGAAAGTTCTGTATAGCTGTACTAATACATTAGGAATAGGCTAGACTTCTTCGCCGCTGGAATAAAACAGCTGGGCCTTCTCTTCATTGGTACCACTTGCTTTGCTCTATTGAAAGTACAAAGAATAGAGCAGACGAGTGTAAACATCCTATCTGCGTTCCAACAGAAGTGCGTATTGAAGTCATCTCATGC…	CGGTTCCCTTTCTTGCCTGAAATGCTCGTTCTAATGGAAAAAAAAAGAAATAAAGGTGGGCCTGCCCATTAGCAGGAAATTGGTACTTAATTATTGAAAAAAAAATTATTGGTTGCTAAGAGATTCGAACTCTTGCATCTTACGATACCTGAGTATTCCCACAGTTAACTGCGGTCAAGATATTTCTTGAATCAGGCGCCTTAGACCGCTCGGCCAAACAACCACTTATTTGTTGAAAGCGAGCGCGGTACAAGTAATGTTACCTCATCTGATATACAATAAAGGTGGAGCGCCAATATATACGCATTTGACTGTTCATAATTCATTGAATATAATTTATTCCTTGTTAGTACAAAAGGGTTAAACAGAAAAAGACGTGACGTTGTAACCGAGAGGATG…
2679	5306	11	11	0	0	NC_001136	927887	928219	NC_001139	857273	857825	|gene gene= HEM1 note= synonym: CYD1 |CDS[fcd=-605](+,927448,929094) gene= HEM1 note= Hem1p;	|gene note= GO_component: cytosol [goid 0005829] [evidence NAS] |neigh_up CDS[fcd=-1243](-,855269,856306) gene= RNR4 note= Rnr4p; |neigh_down CDS[fcd=743](+,858292,858609) gene= TIM13 note= Tim13p;	CGGTGGTACAAGAAACATTGCTGGCCATAACATCCCCACTTTGAATCTGGAAGCCGAATTGGCCACTTTACACAAGAAGGAAGGTGCCTTAGTTTTTTCGTCATGTTACGTAGCCAACGATGCCGTCTTATCCCTACTGGGTCAAAAGATGAAGGACTTGGTGATTTTCTCCGACGAACTCAACCATGCGTCCATGATTGTCGGTATTAAGCATGCTAACGTAAAAAAACACATTTTCAAACATAATGACTTGAACGAATTGGAACAACTGCTCCAGTCATACCCCAAATCCGTTCCTAAACTAATTGCTTTCGAATCAGTATATTCTATGG	CGGTTCCCTTTCTTGCCTGAAATGCTCGTTCTAATGGAAAAAAAAAGAAATAAAGGTGGGCCTGCCCATTAGCAGGAAATTGGTACTTAATTATTGAAAAAAAAATTATTGGTTGCTAAGAGATTCGAACTCTTGCATCTTACGATACCTGAGTATTCCCACAGTTAACTGCGGTCAAGATATTTCTTGAATCAGGCGCCTTAGACCGCTCGGCCAAACAACCACTTATTTGTTGAAAGCGAGCGCGGTACAAGTAATGTTACCTCATCTGATATACAATAAAGGTGGAGCGCCAATATATACGCATTTGACTGTTCATAATTCATTGAATATAATTTATTCCTTGTTAGTACAAAAGGGTTAAACAGAAAAAGACGTGACGTTGTAACCGAGAGGATG…
2688	5306	0	0	4	4	NC_001136	931474	931701	NC_001139	857273	857825	|gene gene= LYS4 note= synonym: LYS3 |CDS[fcd=-462](+,931125,933206) gene= LYS4 note= Lys4p;	|gene note= GO_component: cytosol [goid 0005829] [evidence NAS] |neigh_up CDS[fcd=-1243](-,855269,856306) gene= RNR4 note= Rnr4p; |neigh_down CDS[fcd=743](+,858292,858609) gene= TIM13 note= Tim13p;	CGGTAGAGGTATTGGTCATCAAATTATGATTGAGGAGGGCTATGCTTTCCCCTTGAACATGACTGTCGCATCTGACTCGCATTCAAACACCTACGGTGGTCTGGGGTCGCTGGGCACTCCAATAGTGAGAACAGACGCTGCAGCCATATGGGCCACGGGACAGACGTGGTGGCAGATCCCACCAGTGGCTCAGGTTGAGTTGAAAGGTCAATTGCCTCAGGGTGTTT	CGGTTCCCTTTCTTGCCTGAAATGCTCGTTCTAATGGAAAAAAAAAGAAATAAAGGTGGGCCTGCCCATTAGCAGGAAATTGGTACTTAATTATTGAAAAAAAAATTATTGGTTGCTAAGAGATTCGAACTCTTGCATCTTACGATACCTGAGTATTCCCACAGTTAACTGCGGTCAAGATATTTCTTGAATCAGGCGCCTTAGACCGCTCGGCCAAACAACCACTTATTTGTTGAAAGCGAGCGCGGTACAAGTAATGTTACCTCATCTGATATACAATAAAGGTGGAGCGCCAATATATACGCATTTGACTGTTCATAATTCATTGAATATAATTTATTCCTTGTTAGTACAAAAGGGTTAAACAGAAAAAGACGTGACGTTGTAACCGAGAGGATG…
2694	5306	8	8	0	0	NC_001136	941682	941846	NC_001139	857273	857825	|gene |CDS[fcd=1652](-,941053,943416) note= Ydr239cp;	|gene note= GO_component: cytosol [goid 0005829] [evidence NAS] |neigh_up CDS[fcd=-1243](-,855269,856306) gene= RNR4 note= Rnr4p; |neigh_down CDS[fcd=743](+,858292,858609) gene= TIM13 note= Tim13p;	CGGCAAGTTAGGAGGCGCTTGTAAAAAGTTAGAAGTCTTGTAATACTTTAGTCGCAGTTCTTCTACGTAACTAGAAACCAAAGGCACGGACTTTTCCGATTTGTTCGATACGACAGATGTTAACGGTGAACATTTGACAGATCTTTCGCTTGGGGCATCATGTA	CGGTTCCCTTTCTTGCCTGAAATGCTCGTTCTAATGGAAAAAAAAAGAAATAAAGGTGGGCCTGCCCATTAGCAGGAAATTGGTACTTAATTATTGAAAAAAAAATTATTGGTTGCTAAGAGATTCGAACTCTTGCATCTTACGATACCTGAGTATTCCCACAGTTAACTGCGGTCAAGATATTTCTTGAATCAGGCGCCTTAGACCGCTCGGCCAAACAACCACTTATTTGTTGAAAGCGAGCGCGGTACAAGTAATGTTACCTCATCTGATATACAATAAAGGTGGAGCGCCAATATATACGCATTTGACTGTTCATAATTCATTGAATATAATTTATTCCTTGTTAGTACAAAAGGGTTAAACAGAAAAAGACGTGACGTTGTAACCGAGAGGATG…
2700	5306	0	108	0	730	NC_001136	945976	946388	NC_001139	857273	857825	|LTR note= YDRCSIGMA3 |gene gene= SUP2 gene= SUP2 note= GO_component: cytosol [goid 0005829] [evidence NAS] |neigh_up CDS[fcd=-1034](-,943670,945148) gene= SNU56 note= Snu56p; |neigh_down CDS[fcd=621](+,946803,948452) gene= AMD2 note= Amd2p;	|gene note= GO_component: cytosol [goid 0005829] [evidence NAS] |neigh_up CDS[fcd=-1243](-,855269,856306) gene= RNR4 note= Rnr4p; |neigh_down CDS[fcd=743](+,858292,858609) gene= TIM13 note= Tim13p;	CGGAGTGTTTTGACAATCCTAATATAAACAGTCTTAGGGAAGTAACCAGTTGTCAAAACAGTTTATCAGATTAATTCACGGAATGTTACTTATCTTATATATTATATAAAATATGAATCATACTAAGTGGTGGAAGCGCGGAATCTCGGATCTAAACTAATTGTTCAGGCATTTATACTTTTGGGTAGTTCAGCTAGGGAAGGACGGGTTTTGTCTCATGTTGTTCGTTTTGTTATAAGGTTGTTTCATATGTGTTTTATGAACGTTTAGGATGACGTATTGTCATACTGACGTATCTCATTTTGAGATACAACACCTCGCAAGAAATCGACTCTCGGTAGCCAAGTTGGTTTAAGGCGCAAGACTGTAATTTATCACTACGAAATCTTGAGATCGGGC…	CGGTTCCCTTTCTTGCCTGAAATGCTCGTTCTAATGGAAAAAAAAAGAAATAAAGGTGGGCCTGCCCATTAGCAGGAAATTGGTACTTAATTATTGAAAAAAAAATTATTGGTTGCTAAGAGATTCGAACTCTTGCATCTTACGATACCTGAGTATTCCCACAGTTAACTGCGGTCAAGATATTTCTTGAATCAGGCGCCTTAGACCGCTCGGCCAAACAACCACTTATTTGTTGAAAGCGAGCGCGGTACAAGTAATGTTACCTCATCTGATATACAATAAAGGTGGAGCGCCAATATATACGCATTTGACTGTTCATAATTCATTGAATATAATTTATTCCTTGTTAGTACAAAAGGGTTAAACAGAAAAAGACGTGACGTTGTAACCGAGAGGATG…
2700	5325	0	0	0	1	NC_001136	945976	946388	NC_001139	883133	883186	|LTR note= YDRCSIGMA3 |gene gene= SUP2 gene= SUP2 note= GO_component: cytosol [goid 0005829] [evidence NAS] |neigh_up CDS[fcd=-1034](-,943670,945148) gene= SNU56 note= Snu56p; |neigh_down CDS[fcd=621](+,946803,948452) gene= AMD2 note= Amd2p;	|gene gene= TDH3 note= synonyms: SSS2, HSP36, HSP35, GLD1 |CDS[fcd=656](-,882817,883815) gene= TDH3 note= Tdh3p;	CGGAGTGTTTTGACAATCCTAATATAAACAGTCTTAGGGAAGTAACCAGTTGTCAAAACAGTTTATCAGATTAATTCACGGAATGTTACTTATCTTATATATTATATAAAATATGAATCATACTAAGTGGTGGAAGCGCGGAATCTCGGATCTAAACTAATTGTTCAGGCATTTATACTTTTGGGTAGTTCAGCTAGGGAAGGACGGGTTTTGTCTCATGTTGTTCGTTTTGTTATAAGGTTGTTTCATATGTGTTTTATGAACGTTTAGGATGACGTATTGTCATACTGACGTATCTCATTTTGAGATACAACACCTCGCAAGAAATCGACTCTCGGTAGCCAAGTTGGTTTAAGGCGCAAGACTGTAATTTATCACTACGAAATCTTGAGATCGGGC…	CGGTCAACTTACCTTGCAATTCTGGCAAGACCTTACCGACAGCCTTAGCAGCA
2700	721	0	0	0	1	NC_001136	945976	946388	NC_001134	347518	349584	|LTR note= YDRCSIGMA3 |gene gene= SUP2 gene= SUP2 note= GO_component: cytosol [goid 0005829] [evidence NAS] |neigh_up CDS[fcd=-1034](-,943670,945148) gene= SNU56 note= Snu56p; |neigh_down CDS[fcd=621](+,946803,948452) gene= AMD2 note= Amd2p;	|gene |tRNA note= GO_component: cytosol [goid 0005829] [evidence NAS] |gene |CDS[fcd=-674](+,347877,349382) note= Ybr056wp;	CGGAGTGTTTTGACAATCCTAATATAAACAGTCTTAGGGAAGTAACCAGTTGTCAAAACAGTTTATCAGATTAATTCACGGAATGTTACTTATCTTATATATTATATAAAATATGAATCATACTAAGTGGTGGAAGCGCGGAATCTCGGATCTAAACTAATTGTTCAGGCATTTATACTTTTGGGTAGTTCAGCTAGGGAAGGACGGGTTTTGTCTCATGTTGTTCGTTTTGTTATAAGGTTGTTTCATATGTGTTTTATGAACGTTTAGGATGACGTATTGTCATACTGACGTATCTCATTTTGAGATACAACACCTCGCAAGAAATCGACTCTCGGTAGCCAAGTTGGTTTAAGGCGCAAGACTGTAATTTATCACTACGAAATCTTGAGATCGGGC…	CGGAGGAGCTACTAAAGAAAGAGTGCTGCAATTAATACAATTAATATAAGTGTGGTTATTGAAAATAACTATTCATTTATACGGAGGGTTGGCCGAGTGGTCTAAGGCGGCAGACTTAAGATCTGTTGGACGGTTGTCCGCGCGAGTTCGAACCTCGCATCCTTCAGTAATATTTTTTTAATATACATTTTCTCTGCCATCATGGCTTAAAAAATGCTTAAAAGAAGGGAATTAGGGGGGATGGATGAACTAAGACATAACTTTCTTTTCTTCAATTCGAACTCTGTTGGGAAGAGTTGCTTTAAAAAAGACTCTCTATCCATCTATAAAATTTATTAAAACTTTTGAACTGCACAGAATGATTGGCTCACTTAGAAACAAATTTGAGCATTTCAAAGT…
2701	5306	0	0	10	10	NC_001136	946389	946424	NC_001139	857273	857825	|gene gene= SUP2 gene= SUP2 note= GO_component: cytosol [goid 0005829] [evidence NAS] |neigh_up CDS[fcd=-1258](-,943670,945148) gene= SNU56 note= Snu56p; |neigh_down CDS[fcd=397](+,946803,948452) gene= AMD2 note= Amd2p;	|gene note= GO_component: cytosol [goid 0005829] [evidence NAS] |neigh_up CDS[fcd=-1243](-,855269,856306) gene= RNR4 note= Rnr4p; |neigh_down CDS[fcd=743](+,858292,858609) gene= TIM13 note= Tim13p;	CGGGAGATTTTTTTATGTCAAGCACCTACTTTTAG	CGGTTCCCTTTCTTGCCTGAAATGCTCGTTCTAATGGAAAAAAAAAGAAATAAAGGTGGGCCTGCCCATTAGCAGGAAATTGGTACTTAATTATTGAAAAAAAAATTATTGGTTGCTAAGAGATTCGAACTCTTGCATCTTACGATACCTGAGTATTCCCACAGTTAACTGCGGTCAAGATATTTCTTGAATCAGGCGCCTTAGACCGCTCGGCCAAACAACCACTTATTTGTTGAAAGCGAGCGCGGTACAAGTAATGTTACCTCATCTGATATACAATAAAGGTGGAGCGCCAATATATACGCATTTGACTGTTCATAATTCATTGAATATAATTTATTCCTTGTTAGTACAAAAGGGTTAAACAGAAAAAGACGTGACGTTGTAACCGAGAGGATG…
2701	721	0	0	6	6	NC_001136	946389	946424	NC_001134	347518	349584	|gene gene= SUP2 gene= SUP2 note= GO_component: cytosol [goid 0005829] [evidence NAS] |neigh_up CDS[fcd=-1258](-,943670,945148) gene= SNU56 note= Snu56p; |neigh_down CDS[fcd=397](+,946803,948452) gene= AMD2 note= Amd2p;	|gene |tRNA note= GO_component: cytosol [goid 0005829] [evidence NAS] |gene |CDS[fcd=-674](+,347877,349382) note= Ybr056wp;	CGGGAGATTTTTTTATGTCAAGCACCTACTTTTAG	CGGAGGAGCTACTAAAGAAAGAGTGCTGCAATTAATACAATTAATATAAGTGTGGTTATTGAAAATAACTATTCATTTATACGGAGGGTTGGCCGAGTGGTCTAAGGCGGCAGACTTAAGATCTGTTGGACGGTTGTCCGCGCGAGTTCGAACCTCGCATCCTTCAGTAATATTTTTTTAATATACATTTTCTCTGCCATCATGGCTTAAAAAATGCTTAAAAGAAGGGAATTAGGGGGGATGGATGAACTAAGACATAACTTTCTTTTCTTCAATTCGAACTCTGTTGGGAAGAGTTGCTTTAAAAAAGACTCTCTATCCATCTATAAAATTTATTAAAACTTTTGAACTGCACAGAATGATTGGCTCACTTAGAAACAAATTTGAGCATTTCAAAGT…
2702	5306	0	0	6	6	NC_001136	946425	946524	NC_001139	857273	857825	|neigh_up CDS[fcd=-1326](-,943670,945148) gene= SNU56 note= Snu56p; |neigh_down CDS[fcd=329](+,946803,948452) gene= AMD2 note= Amd2p;	|gene note= GO_component: cytosol [goid 0005829] [evidence NAS] |neigh_up CDS[fcd=-1243](-,855269,856306) gene= RNR4 note= Rnr4p; |neigh_down CDS[fcd=743](+,858292,858609) gene= TIM13 note= Tim13p;	CGGCTTTCTGGAGATAAGTTCCCAGTAGTCGTTGTATTTGATTCTCTATTGGATAGTCAATGACACATTCGTGACCGAACAATGAGATATTATTGAGTA	CGGTTCCCTTTCTTGCCTGAAATGCTCGTTCTAATGGAAAAAAAAAGAAATAAAGGTGGGCCTGCCCATTAGCAGGAAATTGGTACTTAATTATTGAAAAAAAAATTATTGGTTGCTAAGAGATTCGAACTCTTGCATCTTACGATACCTGAGTATTCCCACAGTTAACTGCGGTCAAGATATTTCTTGAATCAGGCGCCTTAGACCGCTCGGCCAAACAACCACTTATTTGTTGAAAGCGAGCGCGGTACAAGTAATGTTACCTCATCTGATATACAATAAAGGTGGAGCGCCAATATATACGCATTTGACTGTTCATAATTCATTGAATATAATTTATTCCTTGTTAGTACAAAAGGGTTAAACAGAAAAAGACGTGACGTTGTAACCGAGAGGATG…
2727	5306	5	5	14	14	NC_001136	971217	973206	NC_001139	857273	857825	|gene gene= SET7 note= synonym: RMS1 |CDS(-,969986,971470) gene= SET7 note= Set7p; |gene gene= HSP78 |CDS(-,971804,974239) gene= HSP78 note= Hsp78p;	|gene note= GO_component: cytosol [goid 0005829] [evidence NAS] |neigh_up CDS[fcd=-1243](-,855269,856306) gene= RNR4 note= Rnr4p; |neigh_down CDS[fcd=743](+,858292,858609) gene= TIM13 note= Tim13p;	CGGTTTCGTTCAGGAACTTATCCTTGAGAGAAGGATAATCCTTTATCAGTTGAGATGTTGTAACGCTTAAAACAGAACTACGAGGTATTTTAAACAATGTTTCATCCTTCTTAATCTTTTGAGTGGCAACTACTGCGCGGCCTTGATTATCACAACAAAGATCTTTGATTTCTATCTTAGGGGATACTTCAATTTCAGCGGTAGTTTTTAACCAGCAAACAAAGTTTTCGGTATCTCTTGAAAAATCATCCATTTTCGCAAACTTTCCCCTTTATTACTAGTCATATTGAAATGATCGTATTAAGCTTTTACAAAGGTAATGAAATTTTTTCATACTCGAGAGAAAAATATGTGACACATGTGTGTATTACCCGCAGTAACTCTCGAAGATTACATTTG…	CGGTTCCCTTTCTTGCCTGAAATGCTCGTTCTAATGGAAAAAAAAAGAAATAAAGGTGGGCCTGCCCATTAGCAGGAAATTGGTACTTAATTATTGAAAAAAAAATTATTGGTTGCTAAGAGATTCGAACTCTTGCATCTTACGATACCTGAGTATTCCCACAGTTAACTGCGGTCAAGATATTTCTTGAATCAGGCGCCTTAGACCGCTCGGCCAAACAACCACTTATTTGTTGAAAGCGAGCGCGGTACAAGTAATGTTACCTCATCTGATATACAATAAAGGTGGAGCGCCAATATATACGCATTTGACTGTTCATAATTCATTGAATATAATTTATTCCTTGTTAGTACAAAAGGGTTAAACAGAAAAAGACGTGACGTTGTAACCGAGAGGATG…
2774	5306	4	4	0	0	NC_001136	1011789	1012160	NC_001139	857273	857825	|neigh_up CDS[fcd=-1802](+,1010172,1011269) gene= DON1 note= Don1p; |neigh_down CDS[fcd=274](+,1012248,1012955) gene= BSC2 note= Bsc2p;	|gene note= GO_component: cytosol [goid 0005829] [evidence NAS] |neigh_up CDS[fcd=-1243](-,855269,856306) gene= RNR4 note= Rnr4p; |neigh_down CDS[fcd=743](+,858292,858609) gene= TIM13 note= Tim13p;	CGGGACAAATGCAAGTTAGATTCCTTGATTCCCGAATGCTCGGTCTTGCGTTTCGCCGTGGCTGCATGGAAGGTCATCGTACGGGTACGGGCAGTCTGGCTGAGTGGTGCCGCCAAAGTGCAATAGCTGTCAGTAGGGCGTGAGGAATGTAAAAGGCAAGAAAACATGTACGAGGGAAGAGAAGGGGGCAAAAGAAAGATAATAGGAACGGTGTAGATGAACTAGAAAAGGTTCAAGAGATGATAAACGTGAAGGGAGTGTCATATCTACCGACATAAAGATAGAGATCTTTTTTTTTCCTTTATTTTTTTTTTTGATTTTTTTTTTTGATTTTCTTGATATTAGTTTTTAGAAGTCCTTTGACGGGGCAG	CGGTTCCCTTTCTTGCCTGAAATGCTCGTTCTAATGGAAAAAAAAAGAAATAAAGGTGGGCCTGCCCATTAGCAGGAAATTGGTACTTAATTATTGAAAAAAAAATTATTGGTTGCTAAGAGATTCGAACTCTTGCATCTTACGATACCTGAGTATTCCCACAGTTAACTGCGGTCAAGATATTTCTTGAATCAGGCGCCTTAGACCGCTCGGCCAAACAACCACTTATTTGTTGAAAGCGAGCGCGGTACAAGTAATGTTACCTCATCTGATATACAATAAAGGTGGAGCGCCAATATATACGCATTTGACTGTTCATAATTCATTGAATATAATTTATTCCTTGTTAGTACAAAAGGGTTAAACAGAAAAAGACGTGACGTTGTAACCGAGAGGATG…
2778	5306	0	0	2	2	NC_001136	1014411	1014662	NC_001139	857273	857825	|gene gene= MTH1 note= synonyms: HTR1, DGT1, BPC1 |CDS[fcd=1162](-,1014397,1015698) gene= MTH1 note= Mth1p;	|gene note= GO_component: cytosol [goid 0005829] [evidence NAS] |neigh_up CDS[fcd=-1243](-,855269,856306) gene= RNR4 note= Rnr4p; |neigh_down CDS[fcd=743](+,858292,858609) gene= TIM13 note= Tim13p;	CGGCTGCCAATCCAATCCTAATCTTTGGTAAACTTGTGCCTGACATTGCGACCATATCGTAGCCTTTTCTTCTTTAGATAAGCTGACTTTGTTTTTTCCCTGTTGATTTGTTGCGGCGCTTGATCTCATCATCAATTCATCAAGGTTATTATTGGGGTTTTTCAACTGAATGTTCTTCAATAAAGCCTTTTTCAGAAGCGATTTTGTTTCTGTGCTGTTTTTCCGCGGTATTATGCTTGGTGGGGGCATGT	CGGTTCCCTTTCTTGCCTGAAATGCTCGTTCTAATGGAAAAAAAAAGAAATAAAGGTGGGCCTGCCCATTAGCAGGAAATTGGTACTTAATTATTGAAAAAAAAATTATTGGTTGCTAAGAGATTCGAACTCTTGCATCTTACGATACCTGAGTATTCCCACAGTTAACTGCGGTCAAGATATTTCTTGAATCAGGCGCCTTAGACCGCTCGGCCAAACAACCACTTATTTGTTGAAAGCGAGCGCGGTACAAGTAATGTTACCTCATCTGATATACAATAAAGGTGGAGCGCCAATATATACGCATTTGACTGTTCATAATTCATTGAATATAATTTATTCCTTGTTAGTACAAAAGGGTTAAACAGAAAAAGACGTGACGTTGTAACCGAGAGGATG…
2840	5306	0	0	1	1	NC_001136	1066460	1071236	NC_001139	857273	857825	|gene gene= CFT1 note= synonym: YHH1 |CDS(+,1063348,1067421) gene= CFT1 note= Cft1p; |gene gene= GPI11 |CDS(+,1067727,1068386) gene= GPI11 note= Gpi11p; |gene gene= RSC3 |CDS(-,1068725,1071382) gene= RSC3 note= Rsc3p;	|gene note= GO_component: cytosol [goid 0005829] [evidence NAS] |neigh_up CDS[fcd=-1243](-,855269,856306) gene= RNR4 note= Rnr4p; |neigh_down CDS[fcd=743](+,858292,858609) gene= TIM13 note= Tim13p;	CGGTGTTGCCAATGCCACCACTGAAGACACTCCACCAACTGGCGCTTTCCATATTTATGATGTGATAGAAGTTGTTCCCGAACCTGGTAAACCTGATACCAATTATAAGCTCAAGGAAATTTTTCAAGAAGAGGTCAGTGGTACTGTATCTACTGTTTGTGAGGTTAGTGGAAGATTCATGATTAGTCAAAGCCAAAAAGTTCTAGTAAGAGATATCCAAGAAGATAATTCCGTCATACCAGTGGCATTTTTGGATATTCCTGTTTTCGTTACGGATTCTAAAAGCTTTGGTAATCTTTTGATAATTGGTGACGCTATGCAGGGGTTCCAATTTATTGGTTTTGACGCAGAACCATACAGGATGATTTCATTGGGCAGAAGTATGTCGAAATTTCAAAC…	CGGTTCCCTTTCTTGCCTGAAATGCTCGTTCTAATGGAAAAAAAAAGAAATAAAGGTGGGCCTGCCCATTAGCAGGAAATTGGTACTTAATTATTGAAAAAAAAATTATTGGTTGCTAAGAGATTCGAACTCTTGCATCTTACGATACCTGAGTATTCCCACAGTTAACTGCGGTCAAGATATTTCTTGAATCAGGCGCCTTAGACCGCTCGGCCAAACAACCACTTATTTGTTGAAAGCGAGCGCGGTACAAGTAATGTTACCTCATCTGATATACAATAAAGGTGGAGCGCCAATATATACGCATTTGACTGTTCATAATTCATTGAATATAATTTATTCCTTGTTAGTACAAAAGGGTTAAACAGAAAAAGACGTGACGTTGTAACCGAGAGGATG…
2842	5306	6	6	7	7	NC_001136	1071247	1073090	NC_001139	857273	857825	|gene gene= RSC3 |CDS(-,1068725,1071382) gene= RSC3 note= Rsc3p; |gene gene= CPR5 note= synonym: CYP5 |CDS(-,1071876,1072553) gene= CPR5 note= Cpr5p; |gene gene= HNT2 note= synonym: APH1 gene= HNT2 note= Hnt2p;	|gene note= GO_component: cytosol [goid 0005829] [evidence NAS] |neigh_up CDS[fcd=-1243](-,855269,856306) gene= RNR4 note= Rnr4p; |neigh_down CDS[fcd=743](+,858292,858609) gene= TIM13 note= Tim13p;	CGGATAAAAGCAGTCCATTTTATTATGCTTCATACAGTTCCCACAAATCGGCTTAACACGATCGCAGCCTATCTTCCTCTTACGGCACTGCACGCATGCAGGCGGTTTTTTCATTTTTCTACCACGAATATCCATCGTTGTTTTTTGGTTCTGAAATGCTATTTTTGTAGATAAGAGCTTAAGAAAATATCACAGAAACCTCGATTTTAAATATCTGCGTAGTATGGGGCAATTGCAGCAGAGCACCAATGACTTTGGTTTGAAAGCCGTGAGTTTTGATGAAATAATCTAATGTAAGCAGCTAATATATCTTCTCGGGCGAAAACGGGAAAGTGGTCTTACAAGCGTCTAACGGGCCGAATGAATATTGGTGAACTATGGCTATTTGCGAGAAGGTAT…	CGGTTCCCTTTCTTGCCTGAAATGCTCGTTCTAATGGAAAAAAAAAGAAATAAAGGTGGGCCTGCCCATTAGCAGGAAATTGGTACTTAATTATTGAAAAAAAAATTATTGGTTGCTAAGAGATTCGAACTCTTGCATCTTACGATACCTGAGTATTCCCACAGTTAACTGCGGTCAAGATATTTCTTGAATCAGGCGCCTTAGACCGCTCGGCCAAACAACCACTTATTTGTTGAAAGCGAGCGCGGTACAAGTAATGTTACCTCATCTGATATACAATAAAGGTGGAGCGCCAATATATACGCATTTGACTGTTCATAATTCATTGAATATAATTTATTCCTTGTTAGTACAAAAGGGTTAAACAGAAAAAGACGTGACGTTGTAACCGAGAGGATG…
2874	5306	0	0	32	32	NC_001136	1108880	1108924	NC_001139	857273	857825	|gene gene= ASP1 |CDS[fcd=-203](+,1108699,1109844) gene= ASP1 note= Asp1p;	|gene note= GO_component: cytosol [goid 0005829] [evidence NAS] |neigh_up CDS[fcd=-1243](-,855269,856306) gene= RNR4 note= Rnr4p; |neigh_down CDS[fcd=743](+,858292,858609) gene= TIM13 note= Tim13p;	CGGTGGTACTATTGCATCGAAAGCTATAGACTCCTCTCAAACTG	CGGTTCCCTTTCTTGCCTGAAATGCTCGTTCTAATGGAAAAAAAAAGAAATAAAGGTGGGCCTGCCCATTAGCAGGAAATTGGTACTTAATTATTGAAAAAAAAATTATTGGTTGCTAAGAGATTCGAACTCTTGCATCTTACGATACCTGAGTATTCCCACAGTTAACTGCGGTCAAGATATTTCTTGAATCAGGCGCCTTAGACCGCTCGGCCAAACAACCACTTATTTGTTGAAAGCGAGCGCGGTACAAGTAATGTTACCTCATCTGATATACAATAAAGGTGGAGCGCCAATATATACGCATTTGACTGTTCATAATTCATTGAATATAATTTATTCCTTGTTAGTACAAAAGGGTTAAACAGAAAAAGACGTGACGTTGTAACCGAGAGGATG…
2874	2875	0	0	6	6	NC_001136	1108880	1108924	NC_001136	1108925	1109604	|gene gene= ASP1 |CDS[fcd=-203](+,1108699,1109844) gene= ASP1 note= Asp1p;	|gene gene= ASP1 |CDS[fcd=-565](+,1108699,1109844) gene= ASP1 note= Asp1p;	CGGTGGTACTATTGCATCGAAAGCTATAGACTCCTCTCAAACTG	CGGCTATCATGTTGACCTGACCATCCAAGATCTATTGGATGCCATTCCAGATATATCCAAGGTCTGTGACATTGAATATGAGCAACTATGCAACGTGGATTCTAAAGACATAAACGAGGATATTCTTTATAAAATTTATAAGGGCGTCTCAGAATCGTTGCAGGCTTTTGACGGTATAGTTATTACCCATGGGACTGATACGCTATCTGAAACTGCATTCTTTATTGAAAGTACTATTGATGCTGGCGACGTTCCTATTGTTTTTGTTGGTTCGATGCGTCCTTCAACCAGCGTTTCTGCTGATGGCCCTATGAACCTTTACCAAGCAATTTGCATTGCTTCAAATCCAAAATCTAGAGGAAGAGGTGTTCTTGTTTCCTTGAATGACCAAATTTCCTC…
2875	5306	0	0	26	26	NC_001136	1108925	1109604	NC_001139	857273	857825	|gene gene= ASP1 |CDS[fcd=-565](+,1108699,1109844) gene= ASP1 note= Asp1p;	|gene note= GO_component: cytosol [goid 0005829] [evidence NAS] |neigh_up CDS[fcd=-1243](-,855269,856306) gene= RNR4 note= Rnr4p; |neigh_down CDS[fcd=743](+,858292,858609) gene= TIM13 note= Tim13p;	CGGCTATCATGTTGACCTGACCATCCAAGATCTATTGGATGCCATTCCAGATATATCCAAGGTCTGTGACATTGAATATGAGCAACTATGCAACGTGGATTCTAAAGACATAAACGAGGATATTCTTTATAAAATTTATAAGGGCGTCTCAGAATCGTTGCAGGCTTTTGACGGTATAGTTATTACCCATGGGACTGATACGCTATCTGAAACTGCATTCTTTATTGAAAGTACTATTGATGCTGGCGACGTTCCTATTGTTTTTGTTGGTTCGATGCGTCCTTCAACCAGCGTTTCTGCTGATGGCCCTATGAACCTTTACCAAGCAATTTGCATTGCTTCAAATCCAAAATCTAGAGGAAGAGGTGTTCTTGTTTCCTTGAATGACCAAATTTCCTC…	CGGTTCCCTTTCTTGCCTGAAATGCTCGTTCTAATGGAAAAAAAAAGAAATAAAGGTGGGCCTGCCCATTAGCAGGAAATTGGTACTTAATTATTGAAAAAAAAATTATTGGTTGCTAAGAGATTCGAACTCTTGCATCTTACGATACCTGAGTATTCCCACAGTTAACTGCGGTCAAGATATTTCTTGAATCAGGCGCCTTAGACCGCTCGGCCAAACAACCACTTATTTGTTGAAAGCGAGCGCGGTACAAGTAATGTTACCTCATCTGATATACAATAAAGGTGGAGCGCCAATATATACGCATTTGACTGTTCATAATTCATTGAATATAATTTATTCCTTGTTAGTACAAAAGGGTTAAACAGAAAAAGACGTGACGTTGTAACCGAGAGGATG…
2875	2874	0	0	6	6	NC_001136	1108925	1109604	NC_001136	1108880	1108924	|gene gene= ASP1 |CDS[fcd=-565](+,1108699,1109844) gene= ASP1 note= Asp1p;	|gene gene= ASP1 |CDS[fcd=-203](+,1108699,1109844) gene= ASP1 note= Asp1p;	CGGCTATCATGTTGACCTGACCATCCAAGATCTATTGGATGCCATTCCAGATATATCCAAGGTCTGTGACATTGAATATGAGCAACTATGCAACGTGGATTCTAAAGACATAAACGAGGATATTCTTTATAAAATTTATAAGGGCGTCTCAGAATCGTTGCAGGCTTTTGACGGTATAGTTATTACCCATGGGACTGATACGCTATCTGAAACTGCATTCTTTATTGAAAGTACTATTGATGCTGGCGACGTTCCTATTGTTTTTGTTGGTTCGATGCGTCCTTCAACCAGCGTTTCTGCTGATGGCCCTATGAACCTTTACCAAGCAATTTGCATTGCTTCAAATCCAAAATCTAGAGGAAGAGGTGTTCTTGTTTCCTTGAATGACCAAATTTCCTC…	CGGTGGTACTATTGCATCGAAAGCTATAGACTCCTCTCAAACTG
2898	5306	0	0	2	2	NC_001136	1129143	1129313	NC_001139	857273	857825	|gene gene= UBX5 |CDS[fcd=-1361](+,1127867,1129369) gene= UBX5 note= Ubx5p;	|gene note= GO_component: cytosol [goid 0005829] [evidence NAS] |neigh_up CDS[fcd=-1243](-,855269,856306) gene= RNR4 note= Rnr4p; |neigh_down CDS[fcd=743](+,858292,858609) gene= TIM13 note= Tim13p;	CGGTGATGGCTCCAGACTAGTTCGTAGATTCAATGCTCTGGAAGACACTGTGCGTACTATTTACGAGGTTATCAAGACAGAAATGGATGGTTTTGCCGATTCAAGATTCACACTAAATGATCACCAAAGAGAGGACTTGATTGATAAATTAAACATGACCATAGCGGACG	CGGTTCCCTTTCTTGCCTGAAATGCTCGTTCTAATGGAAAAAAAAAGAAATAAAGGTGGGCCTGCCCATTAGCAGGAAATTGGTACTTAATTATTGAAAAAAAAATTATTGGTTGCTAAGAGATTCGAACTCTTGCATCTTACGATACCTGAGTATTCCCACAGTTAACTGCGGTCAAGATATTTCTTGAATCAGGCGCCTTAGACCGCTCGGCCAAACAACCACTTATTTGTTGAAAGCGAGCGCGGTACAAGTAATGTTACCTCATCTGATATACAATAAAGGTGGAGCGCCAATATATACGCATTTGACTGTTCATAATTCATTGAATATAATTTATTCCTTGTTAGTACAAAAGGGTTAAACAGAAAAAGACGTGACGTTGTAACCGAGAGGATG…
2904	5306	2	2	0	0	NC_001136	1134886	1135319	NC_001139	857273	857825	|gene |CDS[fcd=324](-,1133255,1135426) note= Ydr333cp;	|gene note= GO_component: cytosol [goid 0005829] [evidence NAS] |neigh_up CDS[fcd=-1243](-,855269,856306) gene= RNR4 note= Rnr4p; |neigh_down CDS[fcd=743](+,858292,858609) gene= TIM13 note= Tim13p;	CGGATCACTTTCTAAGCTTAAAAATGACTTCCAAGGTTGGCTAGATGCTTCCTCTGGTTCAGATGCCGTGAAGAAACCTTCCTCATTAGTGTCATCATTTTTAGTCTTACCGTACTTCAATATATCAGTTTTTTTGAACTGTTGGATAATCTTGTCGAATTCTTCATCATCATCATCATCATCGGAACCCTTGTCTTTTGCAGCCTCGGCGGTATGGTTTTTTTGCTTCCTTTTTGCCTTTTTATTCTTTTTCCTTCTAGAAGACTTGGATGCTAGTGTAATTCTTTTAGGTTGACCATTACTTTGAGTATCACGCTCCCCAGCAGCAGCAGCTTCTTCATCCTGCTCAGACATTTGTCCTTCATCAGTGCTATTATCTGAATCACGTACGTTATTCAT…	CGGTTCCCTTTCTTGCCTGAAATGCTCGTTCTAATGGAAAAAAAAAGAAATAAAGGTGGGCCTGCCCATTAGCAGGAAATTGGTACTTAATTATTGAAAAAAAAATTATTGGTTGCTAAGAGATTCGAACTCTTGCATCTTACGATACCTGAGTATTCCCACAGTTAACTGCGGTCAAGATATTTCTTGAATCAGGCGCCTTAGACCGCTCGGCCAAACAACCACTTATTTGTTGAAAGCGAGCGCGGTACAAGTAATGTTACCTCATCTGATATACAATAAAGGTGGAGCGCCAATATATACGCATTTGACTGTTCATAATTCATTGAATATAATTTATTCCTTGTTAGTACAAAAGGGTTAAACAGAAAAAGACGTGACGTTGTAACCGAGAGGATG…
2932	5306	1	1	0	0	NC_001136	1164942	1165078	NC_001139	857273	857825	|neigh_up CDS[fcd=-356](-,1162951,1164654) gene= HXT3 note= Hxt3p; |neigh_down CDS[fcd=3643](-,1167208,1168653) gene= SVF1 note= Svf1p;	|gene note= GO_component: cytosol [goid 0005829] [evidence NAS] |neigh_up CDS[fcd=-1243](-,855269,856306) gene= RNR4 note= Rnr4p; |neigh_down CDS[fcd=743](+,858292,858609) gene= TIM13 note= Tim13p;	CGGAAATACCAACATCGGGGAAAGCGGAAAATCTGGAAAAATTCTCCACGAAGCTTTCTCTGTGATAATCCGCGACCGAGAGTTTAACCGAATCCGCGGAACGAGATATTCCGTGTTTATTGCGGTATTATATGAG	CGGTTCCCTTTCTTGCCTGAAATGCTCGTTCTAATGGAAAAAAAAAGAAATAAAGGTGGGCCTGCCCATTAGCAGGAAATTGGTACTTAATTATTGAAAAAAAAATTATTGGTTGCTAAGAGATTCGAACTCTTGCATCTTACGATACCTGAGTATTCCCACAGTTAACTGCGGTCAAGATATTTCTTGAATCAGGCGCCTTAGACCGCTCGGCCAAACAACCACTTATTTGTTGAAAGCGAGCGCGGTACAAGTAATGTTACCTCATCTGATATACAATAAAGGTGGAGCGCCAATATATACGCATTTGACTGTTCATAATTCATTGAATATAATTTATTCCTTGTTAGTACAAAAGGGTTAAACAGAAAAAGACGTGACGTTGTAACCGAGAGGATG…
2935	5306	116	116	0	0	NC_001136	1165118	1165555	NC_001139	857273	857825	|neigh_up CDS[fcd=-682](-,1162951,1164654) gene= HXT3 note= Hxt3p; |neigh_down CDS[fcd=3317](-,1167208,1168653) gene= SVF1 note= Svf1p;	|gene note= GO_component: cytosol [goid 0005829] [evidence NAS] |neigh_up CDS[fcd=-1243](-,855269,856306) gene= RNR4 note= Rnr4p; |neigh_down CDS[fcd=743](+,858292,858609) gene= TIM13 note= Tim13p;	CGGGCAGCAGGCGAAGCTGGAAGAATATAGCTAAGAAAATGCGCACGGAAAAAAAACACTCCCGAATTTCTCCGTGAAAAGAGCCTACTAGGGGATAATAGTAGGTATCCGTTAATATTACCGAACTATTGAAAACCTACCAAATGCAAGAAGATGCAAACGAGCTAGAATGTTCCGCGAATAGCTCATCTTACAATTTTTTTCTTTTTTCAAGAAAAAGAAAGTATTTTTTTTTCCTTTCATTTCATTGCTCCTCCTCCAGGTGTTATCTCGAGAAGATGAAGGCTGTCTGCGATGACGAATAGGAAAGAAAAAATTTTCCTTAATTTTGCTTGCTTAATTCTTATACGAATAATTCTTCTTAATCAACATCGGGCTTCATATTTACCAACACGCATT…	CGGTTCCCTTTCTTGCCTGAAATGCTCGTTCTAATGGAAAAAAAAAGAAATAAAGGTGGGCCTGCCCATTAGCAGGAAATTGGTACTTAATTATTGAAAAAAAAATTATTGGTTGCTAAGAGATTCGAACTCTTGCATCTTACGATACCTGAGTATTCCCACAGTTAACTGCGGTCAAGATATTTCTTGAATCAGGCGCCTTAGACCGCTCGGCCAAACAACCACTTATTTGTTGAAAGCGAGCGCGGTACAAGTAATGTTACCTCATCTGATATACAATAAAGGTGGAGCGCCAATATATACGCATTTGACTGTTCATAATTCATTGAATATAATTTATTCCTTGTTAGTACAAAAGGGTTAAACAGAAAAAGACGTGACGTTGTAACCGAGAGGATG…
2965	5306	0	0	53	53	NC_001136	1198674	1198905	NC_001139	857273	857825	|gene gene= TFC6 |CDS[fcd=-100](-,1196671,1198689) gene= TFC6 note= Tfc6p;	|gene note= GO_component: cytosol [goid 0005829] [evidence NAS] |neigh_up CDS[fcd=-1243](-,855269,856306) gene= RNR4 note= Rnr4p; |neigh_down CDS[fcd=743](+,858292,858609) gene= TIM13 note= Tim13p;	CGGTATTACTGCCATCGCCACAACTTAATATATTATTACACGTATCGCAATGGAGCAAGTTAGAGAAATTTCGCTAATGGATCAAAGAGTACTAGCTTTAGTTTTTAGGACATGAAACTGCTCTTACTGAGTAGAAATCAAAGCTTTAACAACTCATCCAGGCTTTCTCGAACAAAAAATGGAATGTTGTTTATCTTCTTTTGCAACGTAGGGTTTTCGAACCGCAGCTTT	CGGTTCCCTTTCTTGCCTGAAATGCTCGTTCTAATGGAAAAAAAAAGAAATAAAGGTGGGCCTGCCCATTAGCAGGAAATTGGTACTTAATTATTGAAAAAAAAATTATTGGTTGCTAAGAGATTCGAACTCTTGCATCTTACGATACCTGAGTATTCCCACAGTTAACTGCGGTCAAGATATTTCTTGAATCAGGCGCCTTAGACCGCTCGGCCAAACAACCACTTATTTGTTGAAAGCGAGCGCGGTACAAGTAATGTTACCTCATCTGATATACAATAAAGGTGGAGCGCCAATATATACGCATTTGACTGTTCATAATTCATTGAATATAATTTATTCCTTGTTAGTACAAAAGGGTTAAACAGAAAAAGACGTGACGTTGTAACCGAGAGGATG…
3020	5306	0	0	570	570	NC_001136	1251279	1251371	NC_001139	857273	857825	|gene gene= RVS167 |CDS[fcd=-1147](+,1250178,1251626) gene= RVS167 note= Rvs167p;	|gene note= GO_component: cytosol [goid 0005829] [evidence NAS] |neigh_up CDS[fcd=-1243](-,855269,856306) gene= RNR4 note= Rnr4p; |neigh_down CDS[fcd=743](+,858292,858609) gene= TIM13 note= Tim13p;	CGGGTACTTATCCACAGTATGCTGCTGCGCAATCTCCACCGCTCACTGGGCTAGGCTTCCAACAATCACCACAGCAGCAACAGGGACCACCA	CGGTTCCCTTTCTTGCCTGAAATGCTCGTTCTAATGGAAAAAAAAAGAAATAAAGGTGGGCCTGCCCATTAGCAGGAAATTGGTACTTAATTATTGAAAAAAAAATTATTGGTTGCTAAGAGATTCGAACTCTTGCATCTTACGATACCTGAGTATTCCCACAGTTAACTGCGGTCAAGATATTTCTTGAATCAGGCGCCTTAGACCGCTCGGCCAAACAACCACTTATTTGTTGAAAGCGAGCGCGGTACAAGTAATGTTACCTCATCTGATATACAATAAAGGTGGAGCGCCAATATATACGCATTTGACTGTTCATAATTCATTGAATATAATTTATTCCTTGTTAGTACAAAAGGGTTAAACAGAAAAAGACGTGACGTTGTAACCGAGAGGATG…
3021	5306	1	1	167	167	NC_001136	1251372	1251507	NC_001139	857273	857825	|gene gene= RVS167 |CDS[fcd=-1261](+,1250178,1251626) gene= RVS167 note= Rvs167p;	|gene note= GO_component: cytosol [goid 0005829] [evidence NAS] |neigh_up CDS[fcd=-1243](-,855269,856306) gene= RNR4 note= Rnr4p; |neigh_down CDS[fcd=743](+,858292,858609) gene= TIM13 note= Tim13p;	CGGCCTACTCTAATCCTCTAACATCACCTGTTGCGGGCACACCAGCCGCGGCCGTAGCGGCAGCTCCTGGCGTTGAAACTGTTACCGCATTGTATGACTACCAAGCTCAAGCTGCTGGTGATTTGTCTTTCCCTG	CGGTTCCCTTTCTTGCCTGAAATGCTCGTTCTAATGGAAAAAAAAAGAAATAAAGGTGGGCCTGCCCATTAGCAGGAAATTGGTACTTAATTATTGAAAAAAAAATTATTGGTTGCTAAGAGATTCGAACTCTTGCATCTTACGATACCTGAGTATTCCCACAGTTAACTGCGGTCAAGATATTTCTTGAATCAGGCGCCTTAGACCGCTCGGCCAAACAACCACTTATTTGTTGAAAGCGAGCGCGGTACAAGTAATGTTACCTCATCTGATATACAATAAAGGTGGAGCGCCAATATATACGCATTTGACTGTTCATAATTCATTGAATATAATTTATTCCTTGTTAGTACAAAAGGGTTAAACAGAAAAAGACGTGACGTTGTAACCGAGAGGATG…
3030	5306	0	0	1	1	NC_001136	1254080	1255209	NC_001139	857273	857825	|gene gene= SAC7 |CDS(+,1252529,1254493) gene= SAC7 note= Sac7p; |gene gene= UBA2 note= synonym: UAL1 |CDS(-,1254929,1256839) gene= UBA2 note= Uba2p;	|gene note= GO_component: cytosol [goid 0005829] [evidence NAS] |neigh_up CDS[fcd=-1243](-,855269,856306) gene= RNR4 note= Rnr4p; |neigh_down CDS[fcd=743](+,858292,858609) gene= TIM13 note= Tim13p;	CGGGAATTTTGAGTGACACAGGAGACAATGGCGACTTAACTGCTACTGAAGCTGAAGGTGATGATTATGAAGAAGAAAATGTTGATCCATACGGTCAGTCTCCATCTAGCGTACACTCAGGTTCTTTGCCCAAACAGCATTATCTGCCAATTCCTCGAATGAACAGATCGTTGAGTGGAAACAGTACCAATTCGTCCTTTAACACTAGACCTATTTCAATGATCCTGACCAGTGGTAATGATAATTCCGCTGATCAATTAGAATTACTAAGTAACACTCATAGCAATAATGAGCGCAGTAATGCTTTACCATTAACCGAAGATGATGGGGATGAAAGAAATTCAAGATCACGCAAGAGGGAATCATGGTTTCAAAGACTAACAAGCCGTTCAGGCTCTG…	CGGTTCCCTTTCTTGCCTGAAATGCTCGTTCTAATGGAAAAAAAAAGAAATAAAGGTGGGCCTGCCCATTAGCAGGAAATTGGTACTTAATTATTGAAAAAAAAATTATTGGTTGCTAAGAGATTCGAACTCTTGCATCTTACGATACCTGAGTATTCCCACAGTTAACTGCGGTCAAGATATTTCTTGAATCAGGCGCCTTAGACCGCTCGGCCAAACAACCACTTATTTGTTGAAAGCGAGCGCGGTACAAGTAATGTTACCTCATCTGATATACAATAAAGGTGGAGCGCCAATATATACGCATTTGACTGTTCATAATTCATTGAATATAATTTATTCCTTGTTAGTACAAAAGGGTTAAACAGAAAAAGACGTGACGTTGTAACCGAGAGGATG…
3051	5306	0	0	2	2	NC_001136	1268016	1268117	NC_001139	857273	857825	|gene gene= UTP5 |CDS[fcd=-603](+,1267463,1269394) gene= UTP5 note= Utp5p;	|gene note= GO_component: cytosol [goid 0005829] [evidence NAS] |neigh_up CDS[fcd=-1243](-,855269,856306) gene= RNR4 note= Rnr4p; |neigh_down CDS[fcd=743](+,858292,858609) gene= TIM13 note= Tim13p;	CGGTCATGTATCTCCAGTGTCCACATTGCAAGTTATAACTAATGAATTTTTCATATCAGGCGCAGAGGGTGATAGATTCTTGAACGTATATGATATTCATT	CGGTTCCCTTTCTTGCCTGAAATGCTCGTTCTAATGGAAAAAAAAAGAAATAAAGGTGGGCCTGCCCATTAGCAGGAAATTGGTACTTAATTATTGAAAAAAAAATTATTGGTTGCTAAGAGATTCGAACTCTTGCATCTTACGATACCTGAGTATTCCCACAGTTAACTGCGGTCAAGATATTTCTTGAATCAGGCGCCTTAGACCGCTCGGCCAAACAACCACTTATTTGTTGAAAGCGAGCGCGGTACAAGTAATGTTACCTCATCTGATATACAATAAAGGTGGAGCGCCAATATATACGCATTTGACTGTTCATAATTCATTGAATATAATTTATTCCTTGTTAGTACAAAAGGGTTAAACAGAAAAAGACGTGACGTTGTAACCGAGAGGATG…
3164	5306	0	0	110	110	NC_001136	1367585	1367804	NC_001139	857273	857825	|gene gene= NHX1 note= synonyms: VPL27, NHA2, VPS44 |CDS[fcd=-217](+,1367477,1369378) gene= NHX1 note= Nhx1p;	|gene note= GO_component: cytosol [goid 0005829] [evidence NAS] |neigh_up CDS[fcd=-1243](-,855269,856306) gene= RNR4 note= Rnr4p; |neigh_down CDS[fcd=743](+,858292,858609) gene= TIM13 note= Tim13p;	CGGGTAGCGATGACCCTATTGCAGGTGATCCTGATGTAGACTTAAACCCTGTTACAGAAGAAATGTTCTCTTCATGGGCATTGTTCATTATGTTGCTCCTATTGATCTCTGCATTGTGGTCTAGTTACTATTTAACTCAGAAACGAATTAGGGCAGTGCATGAAACTGTGCTTTCTATTTTTTATGGTATGGTTATTGGCTTGATAATAAGGATGTCCC	CGGTTCCCTTTCTTGCCTGAAATGCTCGTTCTAATGGAAAAAAAAAGAAATAAAGGTGGGCCTGCCCATTAGCAGGAAATTGGTACTTAATTATTGAAAAAAAAATTATTGGTTGCTAAGAGATTCGAACTCTTGCATCTTACGATACCTGAGTATTCCCACAGTTAACTGCGGTCAAGATATTTCTTGAATCAGGCGCCTTAGACCGCTCGGCCAAACAACCACTTATTTGTTGAAAGCGAGCGCGGTACAAGTAATGTTACCTCATCTGATATACAATAAAGGTGGAGCGCCAATATATACGCATTTGACTGTTCATAATTCATTGAATATAATTTATTCCTTGTTAGTACAAAAGGGTTAAACAGAAAAAGACGTGACGTTGTAACCGAGAGGATG…
3181	5306	0	0	1	1	NC_001136	1383872	1384389	NC_001139	857273	857825	|gene gene= TFB3 note= synonym: RIG2 |CDS[fcd=-327](+,1383803,1384768) gene= TFB3 note= Tfb3p;	|gene note= GO_component: cytosol [goid 0005829] [evidence NAS] |neigh_up CDS[fcd=-1243](-,855269,856306) gene= RNR4 note= Rnr4p; |neigh_down CDS[fcd=743](+,858292,858609) gene= TIM13 note= Tim13p;	CGGATGTGAAATTTTTGGTGAATCCTGAATGCTATCACAGGATCTGTGAGTCGTGTGTTGATCGAATATTTAGTCTCGGTCCTGCCCAGTGTCCATATAAAGGGTGTGACAAGATTCTTAGAAAGAATAAGTTCAAGACCCAAATATTCGATGATGTGGAAGTTGAGAAAGAAGTTGACATCAGGAAGAGAGTGTTCAATGTGTTCAACAAAACTATCGATGACTTCAATGGTGACCTTGTGGAATATAACAAATATTTGGAAGAGGTGGAAGACATTATATACAAACTAGATCACGGGATCGATGTGGCTAAGACCGAGGAGAAACTACGCACCTACGAGGAATTAAACAAGCAACTGATTATGAATAACTTGGAGAGAAGCAGAACAGAGATAGAAA…	CGGTTCCCTTTCTTGCCTGAAATGCTCGTTCTAATGGAAAAAAAAAGAAATAAAGGTGGGCCTGCCCATTAGCAGGAAATTGGTACTTAATTATTGAAAAAAAAATTATTGGTTGCTAAGAGATTCGAACTCTTGCATCTTACGATACCTGAGTATTCCCACAGTTAACTGCGGTCAAGATATTTCTTGAATCAGGCGCCTTAGACCGCTCGGCCAAACAACCACTTATTTGTTGAAAGCGAGCGCGGTACAAGTAATGTTACCTCATCTGATATACAATAAAGGTGGAGCGCCAATATATACGCATTTGACTGTTCATAATTCATTGAATATAATTTATTCCTTGTTAGTACAAAAGGGTTAAACAGAAAAAGACGTGACGTTGTAACCGAGAGGATG…
3183	5306	0	0	1	1	NC_001136	1385548	1386782	NC_001139	857273	857825	|gene |CDS(-,1385516,1385758) note= Ydr461c-ap; |gene gene= MRPL28 |CDS(+,1386065,1386508) gene= MRPL28 note= Mrpl28p;	|gene note= GO_component: cytosol [goid 0005829] [evidence NAS] |neigh_up CDS[fcd=-1243](-,855269,856306) gene= RNR4 note= Rnr4p; |neigh_down CDS[fcd=743](+,858292,858609) gene= TIM13 note= Tim13p;	CGGATATCCCTTGTGGGATCTTGGATGCGGATGGTGAGTGTAAACAGGCCTCATAAAGCTGTCTCTGTGTGCGGAAGATGTCGTTTCATCGGCTTCGACCTCCTCCTTATCTTGCTTCATTGTTTCTTCGTAAGAGGGCGGATCTACGGGCAGCGGGGTCGCTGTCTCCTTGTATGCATGCTTATTTATATCACTCTTTCCGCTATCCATCATAATCTGTTTTTGTTTATGTGCTTTGAATACTCAACACATAAAATAATATCCAGTTAATTGTCGTCTGTCCATTGACGCTTTGCCTTTGTCCCTTTAGACTGTCTTTATTGTGAAATATGCACGGCTGAGAATTACGTATACAGTGACTATCGTATGGGGCGACAAAAGTTCCCAGCGAGAAACAAG…	CGGTTCCCTTTCTTGCCTGAAATGCTCGTTCTAATGGAAAAAAAAAGAAATAAAGGTGGGCCTGCCCATTAGCAGGAAATTGGTACTTAATTATTGAAAAAAAAATTATTGGTTGCTAAGAGATTCGAACTCTTGCATCTTACGATACCTGAGTATTCCCACAGTTAACTGCGGTCAAGATATTTCTTGAATCAGGCGCCTTAGACCGCTCGGCCAAACAACCACTTATTTGTTGAAAGCGAGCGCGGTACAAGTAATGTTACCTCATCTGATATACAATAAAGGTGGAGCGCCAATATATACGCATTTGACTGTTCATAATTCATTGAATATAATTTATTCCTTGTTAGTACAAAAGGGTTAAACAGAAAAAGACGTGACGTTGTAACCGAGAGGATG…
3185	5306	0	0	1	1	NC_001136	1387523	1389166	NC_001139	857273	857825	|gene gene= STP1 note= synonyms: SSY2, BAP1 |CDS(+,1386808,1388367) gene= STP1 note= Stp1p; |gene gene= SPP41 |CDS(+,1388864,1393171) gene= SPP41 note= Spp41p;	|gene note= GO_component: cytosol [goid 0005829] [evidence NAS] |neigh_up CDS[fcd=-1243](-,855269,856306) gene= RNR4 note= Rnr4p; |neigh_down CDS[fcd=743](+,858292,858609) gene= TIM13 note= Tim13p;	CGGCCATTGCGCTCAATGTGGTGAATACTTTTCCACCATTGAAAATTTCGTTGAGAATCACATTGAGTCTGGGGACTGTAAAGCTTTACCGCAGGGGTATACCAAGAAAAATGAAAAAAGATCTGGAAAATTAAGGAAGATCAAGACATCTAATGGTCATTCTAGATTCATATCCACTTCGCAAAGTGTTGTAGAACCTAAAGTACTTTTCAACAAGGATGCCGTAGAGGCTATGACCATAGTGGCTAATAACAGTTCGGGCAATGATATTATATCCAAGTACGGAAACAACAAATTAATGTTAAACTCGGAAAACTTTAAAGTCGACATACCCAAGAGAAAGAGAAAATATATCAAGAAAAAGCAGCAACAGGTATCTGGATCGACGGTAACCACACC…	CGGTTCCCTTTCTTGCCTGAAATGCTCGTTCTAATGGAAAAAAAAAGAAATAAAGGTGGGCCTGCCCATTAGCAGGAAATTGGTACTTAATTATTGAAAAAAAAATTATTGGTTGCTAAGAGATTCGAACTCTTGCATCTTACGATACCTGAGTATTCCCACAGTTAACTGCGGTCAAGATATTTCTTGAATCAGGCGCCTTAGACCGCTCGGCCAAACAACCACTTATTTGTTGAAAGCGAGCGCGGTACAAGTAATGTTACCTCATCTGATATACAATAAAGGTGGAGCGCCAATATATACGCATTTGACTGTTCATAATTCATTGAATATAATTTATTCCTTGTTAGTACAAAAGGGTTAAACAGAAAAAGACGTGACGTTGTAACCGAGAGGATG…
3208	5306	0	1	0	0	NC_001136	1410878	1412767	NC_001139	857273	857825	|gene |CDS(-,1410445,1411119) note= Ydr476cp; |gene gene= SNF1 note= synonyms: PAS14, HAF3, GLC2, CCR1, CAT1 |CDS(+,1412365,1414266) gene= SNF1 note= Snf1p;	|gene note= GO_component: cytosol [goid 0005829] [evidence NAS] |neigh_up CDS[fcd=-1243](-,855269,856306) gene= RNR4 note= Rnr4p; |neigh_down CDS[fcd=743](+,858292,858609) gene= TIM13 note= Tim13p;	CGGTAGCAGTGCGGGTATCGTTGCCCGTGTCATTGTCAATGAAGTAGATAATCTTCTCGATGTTCTGACCCGTTTCTGTGTGAAGGAACTTGAGCGTAAACGTGGACGTCTGCGTGTCGATCTCTGTCAGTCTGACATGCTTGACGGCCTTGGTAATGGGAACGTGGCCAAAAACGGCGAGACAATCCTCCAGCCCCAACTTGTGCGTATCGTTGATGCTTACAATTAACGAATCCCACATACTTGTGTATACCCGTATACTTGCTTGAGTTGATAGAACGCACGCTCTCGCCGATATAAGCCTCCACTCTTTATATATACCATATCCAAATAGGTGTGCACTTTGTGGCAAGGAGTAATTATAAACGAACAGAATATCCCGACCACATGGCAAGACCA…	CGGTTCCCTTTCTTGCCTGAAATGCTCGTTCTAATGGAAAAAAAAAGAAATAAAGGTGGGCCTGCCCATTAGCAGGAAATTGGTACTTAATTATTGAAAAAAAAATTATTGGTTGCTAAGAGATTCGAACTCTTGCATCTTACGATACCTGAGTATTCCCACAGTTAACTGCGGTCAAGATATTTCTTGAATCAGGCGCCTTAGACCGCTCGGCCAAACAACCACTTATTTGTTGAAAGCGAGCGCGGTACAAGTAATGTTACCTCATCTGATATACAATAAAGGTGGAGCGCCAATATATACGCATTTGACTGTTCATAATTCATTGAATATAATTTATTCCTTGTTAGTACAAAAGGGTTAAACAGAAAAAGACGTGACGTTGTAACCGAGAGGATG…
3238	5306	0	0	0	1	NC_001136	1445170	1446318	NC_001139	857273	857825	|gene gene= ITR1 |CDS(-,1443705,1445459) gene= ITR1 note= Itr1p; |gene gene= SEC20 |CDS(-,1445835,1446986) gene= SEC20 note= Sec20p;	|gene note= GO_component: cytosol [goid 0005829] [evidence NAS] |neigh_up CDS[fcd=-1243](-,855269,856306) gene= RNR4 note= Rnr4p; |neigh_down CDS[fcd=743](+,858292,858609) gene= TIM13 note= Tim13p;	CGGATATGGATGCGACAAAAGTCAGAGTGATGATGAAGGGCGAAAGAGATTGGTTAAAAGTGATCATGACCGACGTGTCATCCTCGTCGTTCACGGGTTTAATTTGAATCCTATCTTCATCATCGCTAGCGGGAGCCCTCTGTATTTCATGTGACTCAAGTGTAATTTTACCTCTCTTTGAAGGTGAGTCATGCTCACTGTTGAACTCTACACTATCAGCGTTGCCAACGGCATCACCAACATTTGATTGCGATGTCTTTGACGTGAGATATGGTATGTGTATTCCCATTTTAACACCCACTGCAGAAACAAAGAAAATGAAAGAGATGTATACAGTAGGACGACCAATAAATCTGAATAGCGCACCAAACTGAAAGAGAAGAATAGAGCAAACACCTG…	CGGTTCCCTTTCTTGCCTGAAATGCTCGTTCTAATGGAAAAAAAAAGAAATAAAGGTGGGCCTGCCCATTAGCAGGAAATTGGTACTTAATTATTGAAAAAAAAATTATTGGTTGCTAAGAGATTCGAACTCTTGCATCTTACGATACCTGAGTATTCCCACAGTTAACTGCGGTCAAGATATTTCTTGAATCAGGCGCCTTAGACCGCTCGGCCAAACAACCACTTATTTGTTGAAAGCGAGCGCGGTACAAGTAATGTTACCTCATCTGATATACAATAAAGGTGGAGCGCCAATATATACGCATTTGACTGTTCATAATTCATTGAATATAATTTATTCCTTGTTAGTACAAAAGGGTTAAACAGAAAAAGACGTGACGTTGTAACCGAGAGGATG…
3245	5306	0	4	0	0	NC_001136	1453702	1453746	NC_001139	857273	857825	|gene gene= SAM2 note= synonym: ETH2 |CDS[fcd=732](-,1453302,1454456) gene= SAM2 note= Sam2p;	|gene note= GO_component: cytosol [goid 0005829] [evidence NAS] |neigh_up CDS[fcd=-1243](-,855269,856306) gene= RNR4 note= Rnr4p; |neigh_down CDS[fcd=743](+,858292,858609) gene= TIM13 note= Tim13p;	CGGTCAAACCAGCGTCACCTTGAGGACCACCGATGACGAATCTA	CGGTTCCCTTTCTTGCCTGAAATGCTCGTTCTAATGGAAAAAAAAAGAAATAAAGGTGGGCCTGCCCATTAGCAGGAAATTGGTACTTAATTATTGAAAAAAAAATTATTGGTTGCTAAGAGATTCGAACTCTTGCATCTTACGATACCTGAGTATTCCCACAGTTAACTGCGGTCAAGATATTTCTTGAATCAGGCGCCTTAGACCGCTCGGCCAAACAACCACTTATTTGTTGAAAGCGAGCGCGGTACAAGTAATGTTACCTCATCTGATATACAATAAAGGTGGAGCGCCAATATATACGCATTTGACTGTTCATAATTCATTGAATATAATTTATTCCTTGTTAGTACAAAAGGGTTAAACAGAAAAAGACGTGACGTTGTAACCGAGAGGATG…
3286	5306	0	0	5	5	NC_001136	1490397	1490418	NC_001139	857273	857825	|neigh_up CDS[fcd=-617](-,1489590,1489790) note= Ydr524c-bp; |neigh_down CDS[fcd=181](+,1490588,1490827) gene= SNA2 note= Sna2p;	|gene note= GO_component: cytosol [goid 0005829] [evidence NAS] |neigh_up CDS[fcd=-1243](-,855269,856306) gene= RNR4 note= Rnr4p; |neigh_down CDS[fcd=743](+,858292,858609) gene= TIM13 note= Tim13p;	CGGGGCGATATAATCCATGTA	CGGTTCCCTTTCTTGCCTGAAATGCTCGTTCTAATGGAAAAAAAAAGAAATAAAGGTGGGCCTGCCCATTAGCAGGAAATTGGTACTTAATTATTGAAAAAAAAATTATTGGTTGCTAAGAGATTCGAACTCTTGCATCTTACGATACCTGAGTATTCCCACAGTTAACTGCGGTCAAGATATTTCTTGAATCAGGCGCCTTAGACCGCTCGGCCAAACAACCACTTATTTGTTGAAAGCGAGCGCGGTACAAGTAATGTTACCTCATCTGATATACAATAAAGGTGGAGCGCCAATATATACGCATTTGACTGTTCATAATTCATTGAATATAATTTATTCCTTGTTAGTACAAAAGGGTTAAACAGAAAAAGACGTGACGTTGTAACCGAGAGGATG…
3448	5306	0	0	0	7	NC_001137	91969	93327	NC_001139	857273	857825	|gene gene= SPF1 note= synonyms: PER9, PIO1, COD1 |CDS[fcd=-2390](+,90258,93905) gene= SPF1 note= Spf1p;	|gene note= GO_component: cytosol [goid 0005829] [evidence NAS] |neigh_up CDS[fcd=-1243](-,855269,856306) gene= RNR4 note= Rnr4p; |neigh_down CDS[fcd=743](+,858292,858609) gene= TIM13 note= Tim13p;	CGGAAAATTGGATATTATCCGTAGATTTCAATTTTCTTCTGCTTTAAAAAGGTCTGCTTCTATTGCTTCTCACAACGATGCCTTGTTTGCTGCTGTCAAAGGTGCACCTGAAACGATTCGTGAAAGGCTTTCTGACATTCCCAAGAATTATGACGAAATCTATAAATCCTTTACACGCTCTGGTTCAAGAGTTTTGGCTTTGGCTTCTAAGTCGTTGCCAAAAATGTCTCAGTCTAAAATTGATGATCTAAACCGTGATGATGTTGAATCTGAATTAACCTTTAATGGGTTTTTGATTTTCCATTGTCCTCTGAAGGATGACGCTATTGAAACCATTAAAATGTTAAATGAATCCTCCCATCGTTCTATTATGATTACTGGTGATAATCCATTAACTGC…	CGGTTCCCTTTCTTGCCTGAAATGCTCGTTCTAATGGAAAAAAAAAGAAATAAAGGTGGGCCTGCCCATTAGCAGGAAATTGGTACTTAATTATTGAAAAAAAAATTATTGGTTGCTAAGAGATTCGAACTCTTGCATCTTACGATACCTGAGTATTCCCACAGTTAACTGCGGTCAAGATATTTCTTGAATCAGGCGCCTTAGACCGCTCGGCCAAACAACCACTTATTTGTTGAAAGCGAGCGCGGTACAAGTAATGTTACCTCATCTGATATACAATAAAGGTGGAGCGCCAATATATACGCATTTGACTGTTCATAATTCATTGAATATAATTTATTCCTTGTTAGTACAAAAGGGTTAAACAGAAAAAGACGTGACGTTGTAACCGAGAGGATG…
3502	5306	0	0	0	1	NC_001137	131102	131222	NC_001139	857273	857825	|gene |tRNA note= GO_component: cytosol [goid 0005829] [evidence NAS] |neigh_up CDS[fcd=-2337](+,128825,130561) gene= VAC8 note= Vac8p; |neigh_down CDS[fcd=1958](+,133120,135234) gene= GLC3 note= Glc3p;	|gene note= GO_component: cytosol [goid 0005829] [evidence NAS] |neigh_up CDS[fcd=-1243](-,855269,856306) gene= RNR4 note= Rnr4p; |neigh_down CDS[fcd=743](+,858292,858609) gene= TIM13 note= Tim13p;	CGGGGTTGTTCGGATCAAAACCGAAAGTGATAACCACTACACTATAAAACCTCTTAATTATTGATTTCCACAATAATTTTATCATATATCAACACTATTCTTCACATAGTTTTTTTAATC	CGGTTCCCTTTCTTGCCTGAAATGCTCGTTCTAATGGAAAAAAAAAGAAATAAAGGTGGGCCTGCCCATTAGCAGGAAATTGGTACTTAATTATTGAAAAAAAAATTATTGGTTGCTAAGAGATTCGAACTCTTGCATCTTACGATACCTGAGTATTCCCACAGTTAACTGCGGTCAAGATATTTCTTGAATCAGGCGCCTTAGACCGCTCGGCCAAACAACCACTTATTTGTTGAAAGCGAGCGCGGTACAAGTAATGTTACCTCATCTGATATACAATAAAGGTGGAGCGCCAATATATACGCATTTGACTGTTCATAATTCATTGAATATAATTTATTCCTTGTTAGTACAAAAGGGTTAAACAGAAAAAGACGTGACGTTGTAACCGAGAGGATG…
3533	5306	3	3	0	0	NC_001137	154040	154464	NC_001139	857273	857825	|gene gene= MNN1 |CDS[fcd=-733](+,153519,155807) gene= MNN1 note= Mnn1p;	|gene note= GO_component: cytosol [goid 0005829] [evidence NAS] |neigh_up CDS[fcd=-1243](-,855269,856306) gene= RNR4 note= Rnr4p; |neigh_down CDS[fcd=743](+,858292,858609) gene= TIM13 note= Tim13p;	CGGAAATATGATATGTTCCAGGCATTTGAGAGAATAAGAGCCTATGATAGATGTTTTATGCAGGCCAATCCAGTTAATATTCAAGAAATTTTTCCGAAAAGTGATAAGATGTCGAAAGAGAGGGTTCAATCAAAATTAATCAAAACCTTAAATGCTACTTTCCCTAATTATGATCCAGACAATTTTAAGAAATACGATCAATTCGAATTCGAGCACAAAATGTTTCCGTTTATAAATAACTTTACCACAGAGACTTTTCATGAGATGGTTCCAAAAATCACATCACCTTTTGGAAAAGTATTAGAGCAAGGCTTCTTACCCAAGTTCGATCATAAAACTGGTAAAGTGCAGGAGTATTTCAAATATGAATACGATCCATCAAAAACCTTCTGGGCCAAT…	CGGTTCCCTTTCTTGCCTGAAATGCTCGTTCTAATGGAAAAAAAAAGAAATAAAGGTGGGCCTGCCCATTAGCAGGAAATTGGTACTTAATTATTGAAAAAAAAATTATTGGTTGCTAAGAGATTCGAACTCTTGCATCTTACGATACCTGAGTATTCCCACAGTTAACTGCGGTCAAGATATTTCTTGAATCAGGCGCCTTAGACCGCTCGGCCAAACAACCACTTATTTGTTGAAAGCGAGCGCGGTACAAGTAATGTTACCTCATCTGATATACAATAAAGGTGGAGCGCCAATATATACGCATTTGACTGTTCATAATTCATTGAATATAATTTATTCCTTGTTAGTACAAAAGGGTTAAACAGAAAAAGACGTGACGTTGTAACCGAGAGGATG…
3550	5306	0	0	8	8	NC_001137	171720	171958	NC_001139	857273	857825	|gene gene= SEC3 note= synonym: PSL1 |CDS[fcd=-22](-,167807,171817) gene= SEC3 note= Sec3p;	|gene note= GO_component: cytosol [goid 0005829] [evidence NAS] |neigh_up CDS[fcd=-1243](-,855269,856306) gene= RNR4 note= Rnr4p; |neigh_down CDS[fcd=743](+,858292,858609) gene= TIM13 note= Tim13p;	CGGATATTGTTCTCTTGTGGAAAAACGATGTGTTTTCATCGTGTGATGTCTCACGACTGTGAGACTTCCTTTTAAAAGGAGACTTCGAGGACCTCATAATATAGAATAAATTGCGTAGCCTTGTTACCTAGCTGGAGATATCTGGCACCGACTCAGTCTTTATGACCGCTTTTTCTTCATAAGCTATGATACTGTTATTGCTATAAGTGTTCACCAAGTTAGTATTTGCCCATTAATA	CGGTTCCCTTTCTTGCCTGAAATGCTCGTTCTAATGGAAAAAAAAAGAAATAAAGGTGGGCCTGCCCATTAGCAGGAAATTGGTACTTAATTATTGAAAAAAAAATTATTGGTTGCTAAGAGATTCGAACTCTTGCATCTTACGATACCTGAGTATTCCCACAGTTAACTGCGGTCAAGATATTTCTTGAATCAGGCGCCTTAGACCGCTCGGCCAAACAACCACTTATTTGTTGAAAGCGAGCGCGGTACAAGTAATGTTACCTCATCTGATATACAATAAAGGTGGAGCGCCAATATATACGCATTTGACTGTTCATAATTCATTGAATATAATTTATTCCTTGTTAGTACAAAAGGGTTAAACAGAAAAAGACGTGACGTTGTAACCGAGAGGATG…
3621	5306	0	0	20	20	NC_001137	222046	222354	NC_001139	857273	857825	|gene |CDS[fcd=-355](+,221845,222402) note= Yer034wp;	|gene note= GO_component: cytosol [goid 0005829] [evidence NAS] |neigh_up CDS[fcd=-1243](-,855269,856306) gene= RNR4 note= Rnr4p; |neigh_down CDS[fcd=743](+,858292,858609) gene= TIM13 note= Tim13p;	CGGTACTCGAGGACCCGCATTCTGCAGTCGCCAATGCAGAGTTGAACAAGGTGCTAAAAGACGTCCTCAAAAATCGGCTCCAGCAGAACGACGACGCCACAGCCGTCAATAATGTTGCTAATAAAGATACTTTGAAAATCAAAGACCTCAAGCAGATGAATACGGATGAGCTCAATCGTTGGCTCGGACGGCAGAATACAACATCGGCTATAACAGCGGCTGAGCCCGAATCATTAGTCGTTCCCATTCACGTACAAGGTGATCATGATCGTGCGGGCAAGAAGATCAGTGCCCCTTCGACCGATCTA	CGGTTCCCTTTCTTGCCTGAAATGCTCGTTCTAATGGAAAAAAAAAGAAATAAAGGTGGGCCTGCCCATTAGCAGGAAATTGGTACTTAATTATTGAAAAAAAAATTATTGGTTGCTAAGAGATTCGAACTCTTGCATCTTACGATACCTGAGTATTCCCACAGTTAACTGCGGTCAAGATATTTCTTGAATCAGGCGCCTTAGACCGCTCGGCCAAACAACCACTTATTTGTTGAAAGCGAGCGCGGTACAAGTAATGTTACCTCATCTGATATACAATAAAGGTGGAGCGCCAATATATACGCATTTGACTGTTCATAATTCATTGAATATAATTTATTCCTTGTTAGTACAAAAGGGTTAAACAGAAAAAGACGTGACGTTGTAACCGAGAGGATG…
3632	5306	3	3	0	0	NC_001137	228675	228933	NC_001139	857273	857825	|gene gene= HVG1 note= synonym: YEM9 |CDS[fcd=400](-,228455,229204) gene= HVG1 note= Hvg1p;	|gene note= GO_component: cytosol [goid 0005829] [evidence NAS] |neigh_up CDS[fcd=-1243](-,855269,856306) gene= RNR4 note= Rnr4p; |neigh_down CDS[fcd=743](+,858292,858609) gene= TIM13 note= Tim13p;	CGGAACAGTACGATATCCCCACGGACATGAGCCCACTGATGACCATTGCTGCCAGTGAGTCGGCGGACAAGTTCACAGACAAATTCTTTGTGGACCAATCTTCCATAATGAAGGAAAAGACTAGCAGCAAAGGCAATGCCAGAACGTTGTTATAAAACATAGTATCATAGTCTTTAAAGTTAGTCAGCCGAATTCTCTTCCGCATAATCAAAACGAACAATGCAGACGAAATACAATTGGTGAACATCCAGAGGTACC	CGGTTCCCTTTCTTGCCTGAAATGCTCGTTCTAATGGAAAAAAAAAGAAATAAAGGTGGGCCTGCCCATTAGCAGGAAATTGGTACTTAATTATTGAAAAAAAAATTATTGGTTGCTAAGAGATTCGAACTCTTGCATCTTACGATACCTGAGTATTCCCACAGTTAACTGCGGTCAAGATATTTCTTGAATCAGGCGCCTTAGACCGCTCGGCCAAACAACCACTTATTTGTTGAAAGCGAGCGCGGTACAAGTAATGTTACCTCATCTGATATACAATAAAGGTGGAGCGCCAATATATACGCATTTGACTGTTCATAATTCATTGAATATAATTTATTCCTTGTTAGTACAAAAGGGTTAAACAGAAAAAGACGTGACGTTGTAACCGAGAGGATG…
3638	5306	0	0	9	9	NC_001137	234317	234425	NC_001139	857273	857825	|gene gene= YEN1 |CDS[fcd=-1911](+,232460,234739) gene= YEN1 note= Yen1p;	|gene note= GO_component: cytosol [goid 0005829] [evidence NAS] |neigh_up CDS[fcd=-1243](-,855269,856306) gene= RNR4 note= Rnr4p; |neigh_down CDS[fcd=743](+,858292,858609) gene= TIM13 note= Tim13p;	CGGCTCCCACAAGACTGACCACCGTCGATGAACACAGCGATAATGACGATGATTCGTTGATTTTTGTAGATGAGATTACAAACAGCCAAAGCGTTTTAGATAGTTCAC	CGGTTCCCTTTCTTGCCTGAAATGCTCGTTCTAATGGAAAAAAAAAGAAATAAAGGTGGGCCTGCCCATTAGCAGGAAATTGGTACTTAATTATTGAAAAAAAAATTATTGGTTGCTAAGAGATTCGAACTCTTGCATCTTACGATACCTGAGTATTCCCACAGTTAACTGCGGTCAAGATATTTCTTGAATCAGGCGCCTTAGACCGCTCGGCCAAACAACCACTTATTTGTTGAAAGCGAGCGCGGTACAAGTAATGTTACCTCATCTGATATACAATAAAGGTGGAGCGCCAATATATACGCATTTGACTGTTCATAATTCATTGAATATAATTTATTCCTTGTTAGTACAAAAGGGTTAAACAGAAAAAGACGTGACGTTGTAACCGAGAGGATG…
3641	5306	2	2	0	0	NC_001137	236631	236828	NC_001139	857273	857825	|gene gene= SAH1 |CDS[fcd=389](-,235769,237118) gene= SAH1 note= Sah1p;	|gene note= GO_component: cytosol [goid 0005829] [evidence NAS] |neigh_up CDS[fcd=-1243](-,855269,856306) gene= RNR4 note= Rnr4p; |neigh_down CDS[fcd=743](+,858292,858609) gene= TIM13 note= Tim13p;	CGGTGGTAGTTTCTTCGGAAAGACCAAAGCAGTCTTCCAGCATTTCAGGGTGCTTTTCATGAACTAAAGTGGTTAAATCACCACCATCATCTAAGATCAAGTTCAATTTCTTGTTGTCCTTGAAGGCAAACAATTGTTGTTCAATACACCACAAATACTCTTCTTCAGTTTCACCCTTCCAGGCAAAAACTGGAACA	CGGTTCCCTTTCTTGCCTGAAATGCTCGTTCTAATGGAAAAAAAAAGAAATAAAGGTGGGCCTGCCCATTAGCAGGAAATTGGTACTTAATTATTGAAAAAAAAATTATTGGTTGCTAAGAGATTCGAACTCTTGCATCTTACGATACCTGAGTATTCCCACAGTTAACTGCGGTCAAGATATTTCTTGAATCAGGCGCCTTAGACCGCTCGGCCAAACAACCACTTATTTGTTGAAAGCGAGCGCGGTACAAGTAATGTTACCTCATCTGATATACAATAAAGGTGGAGCGCCAATATATACGCATTTGACTGTTCATAATTCATTGAATATAATTTATTCCTTGTTAGTACAAAAGGGTTAAACAGAAAAAGACGTGACGTTGTAACCGAGAGGATG…
3653	5306	0	0	0	1	NC_001137	250158	250322	NC_001139	857273	857825	|LTR note= YERCSIGMA1 |gene |tRNA note= GO_component: cytosol [goid 0005829] [evidence NAS] |neigh_up CDS[fcd=-2084](-,246981,248156) gene= CAJ1 note= Caj1p; |neigh_down CDS[fcd=477](+,250717,251001) gene= ISD11 note= Isd11p;	|gene note= GO_component: cytosol [goid 0005829] [evidence NAS] |neigh_up CDS[fcd=-1243](-,855269,856306) gene= RNR4 note= Rnr4p; |neigh_down CDS[fcd=743](+,858292,858609) gene= TIM13 note= Tim13p;	CGGGTTTTATCTCATGTTGTTCGTTTTGTTATAAGGTTGTTTCATCTGTGTTTTATGAACGTTTAGGATGACGTATTGTCATACTGACGTATCTCATTTTGAGATACAACAATTTACAGTTGTACTGGTCCTATAGTGTAGTGGTTATCACTTTCGGTTTTGAT	CGGTTCCCTTTCTTGCCTGAAATGCTCGTTCTAATGGAAAAAAAAAGAAATAAAGGTGGGCCTGCCCATTAGCAGGAAATTGGTACTTAATTATTGAAAAAAAAATTATTGGTTGCTAAGAGATTCGAACTCTTGCATCTTACGATACCTGAGTATTCCCACAGTTAACTGCGGTCAAGATATTTCTTGAATCAGGCGCCTTAGACCGCTCGGCCAAACAACCACTTATTTGTTGAAAGCGAGCGCGGTACAAGTAATGTTACCTCATCTGATATACAATAAAGGTGGAGCGCCAATATATACGCATTTGACTGTTCATAATTCATTGAATATAATTTATTCCTTGTTAGTACAAAAGGGTTAAACAGAAAAAGACGTGACGTTGTAACCGAGAGGATG…
3675	5306	0	0	1	1	NC_001137	267499	267522	NC_001139	857273	857825	|gene gene= FCY2 note= synonym: BRA7 |CDS[fcd=602](-,266511,268112) gene= FCY2 note= Fcy2p;	|gene note= GO_component: cytosol [goid 0005829] [evidence NAS] |neigh_up CDS[fcd=-1243](-,855269,856306) gene= RNR4 note= Rnr4p; |neigh_down CDS[fcd=743](+,858292,858609) gene= TIM13 note= Tim13p;	CGGCCCAAATAGGACAGACGTGG	CGGTTCCCTTTCTTGCCTGAAATGCTCGTTCTAATGGAAAAAAAAAGAAATAAAGGTGGGCCTGCCCATTAGCAGGAAATTGGTACTTAATTATTGAAAAAAAAATTATTGGTTGCTAAGAGATTCGAACTCTTGCATCTTACGATACCTGAGTATTCCCACAGTTAACTGCGGTCAAGATATTTCTTGAATCAGGCGCCTTAGACCGCTCGGCCAAACAACCACTTATTTGTTGAAAGCGAGCGCGGTACAAGTAATGTTACCTCATCTGATATACAATAAAGGTGGAGCGCCAATATATACGCATTTGACTGTTCATAATTCATTGAATATAATTTATTCCTTGTTAGTACAAAAGGGTTAAACAGAAAAAGACGTGACGTTGTAACCGAGAGGATG…
3684	5306	0	0	13	13	NC_001137	280121	280330	NC_001139	857273	857825	|gene gene= HOR2 note= synonym: GPP2 |CDS[fcd=455](-,279928,280680) gene= HOR2 note= Hor2p;	|gene note= GO_component: cytosol [goid 0005829] [evidence NAS] |neigh_up CDS[fcd=-1243](-,855269,856306) gene= RNR4 note= Rnr4p; |neigh_down CDS[fcd=743](+,858292,858609) gene= TIM13 note= Tim13p;	CGGCGGCAATACCTGCTGGAGCGTCTTCAAATACTACTACCTTAGATTTGGAAGGGTCTTGCTCATTGATCGGATATCCTAAGCCATTCCTGCCCTTCAGATATGGTTCTGGATGAGGCTTACCCTGTTTGACATCATTAGCGGTAATGAAGTACTTTGGTCTCCTGATTCCCAGATGCTCGAACCATTTTTGTGCCATATCACGGGTA	CGGTTCCCTTTCTTGCCTGAAATGCTCGTTCTAATGGAAAAAAAAAGAAATAAAGGTGGGCCTGCCCATTAGCAGGAAATTGGTACTTAATTATTGAAAAAAAAATTATTGGTTGCTAAGAGATTCGAACTCTTGCATCTTACGATACCTGAGTATTCCCACAGTTAACTGCGGTCAAGATATTTCTTGAATCAGGCGCCTTAGACCGCTCGGCCAAACAACCACTTATTTGTTGAAAGCGAGCGCGGTACAAGTAATGTTACCTCATCTGATATACAATAAAGGTGGAGCGCCAATATATACGCATTTGACTGTTCATAATTCATTGAATATAATTTATTCCTTGTTAGTACAAAAGGGTTAAACAGAAAAAGACGTGACGTTGTAACCGAGAGGATG…
3721	5306	0	0	2	2	NC_001137	320856	321131	NC_001139	857273	857825	|gene gene= AIM9 |CDS[fcd=-1034](+,319959,321842) gene= AIM9 note= Aim9p;	|gene note= GO_component: cytosol [goid 0005829] [evidence NAS] |neigh_up CDS[fcd=-1243](-,855269,856306) gene= RNR4 note= Rnr4p; |neigh_down CDS[fcd=743](+,858292,858609) gene= TIM13 note= Tim13p;	CGGATCTACAAAACAGATGGAAAATTGGGCCATCCGTGGAAAGATGTCTCTGGAGACATAAATCTCACTTGGATTTTCATAAACAAATGAAACCTTTTTTGGGACCATGGCCAAAGAAGTCTCCAATGGATATAATTAAAAATACTGGCCTATTGGAAGCTGAAAATGCTAAAACTAGAATAGCCATGAAAGAGGCAGGAAGTTCAGCTGAATTGATGTATCCTCGAACTTTGAAGGAGCAAATAACTACCTATGAAAATTTAGCTAAGATTGCC	CGGTTCCCTTTCTTGCCTGAAATGCTCGTTCTAATGGAAAAAAAAAGAAATAAAGGTGGGCCTGCCCATTAGCAGGAAATTGGTACTTAATTATTGAAAAAAAAATTATTGGTTGCTAAGAGATTCGAACTCTTGCATCTTACGATACCTGAGTATTCCCACAGTTAACTGCGGTCAAGATATTTCTTGAATCAGGCGCCTTAGACCGCTCGGCCAAACAACCACTTATTTGTTGAAAGCGAGCGCGGTACAAGTAATGTTACCTCATCTGATATACAATAAAGGTGGAGCGCCAATATATACGCATTTGACTGTTCATAATTCATTGAATATAATTTATTCCTTGTTAGTACAAAAGGGTTAAACAGAAAAAGACGTGACGTTGTAACCGAGAGGATG…
3722	5306	0	0	2	2	NC_001137	321132	321777	NC_001139	857273	857825	|gene gene= AIM9 |CDS[fcd=-1495](+,319959,321842) gene= AIM9 note= Aim9p;	|gene note= GO_component: cytosol [goid 0005829] [evidence NAS] |neigh_up CDS[fcd=-1243](-,855269,856306) gene= RNR4 note= Rnr4p; |neigh_down CDS[fcd=743](+,858292,858609) gene= TIM13 note= Tim13p;	CGGATTTATTCAACGTCAAAACAAAGGCCATTCCAAATATGCAGGAACTATTGTCACCACGTTTGTTTCATCCTGATCTAGACCCCATGAATATTATTGTTAACAAAGAAGCACAAGAAGCCTATCTATTAGATTTTGAAGGAGCATGCACAAAACCTTTCATTTTACAGAATTCGCCACAATTCATCGCCTATGATGGGCCCAAGATTTATGACTTAAAGGAGGACATAACCGATTTTGACAAATTATCTGAGGCGGAAAAGGTGCAATATCAGTTCATGTACAAGCGCACCCGTAATCAACATCAATGGGAGAAAAAATTAAATGACAATAATCCTAAATTAATTACTGCAGTTGCCCCACCTGTTAAGCTACTGAGAAGCCCATATATTGCAGCTG…	CGGTTCCCTTTCTTGCCTGAAATGCTCGTTCTAATGGAAAAAAAAAGAAATAAAGGTGGGCCTGCCCATTAGCAGGAAATTGGTACTTAATTATTGAAAAAAAAATTATTGGTTGCTAAGAGATTCGAACTCTTGCATCTTACGATACCTGAGTATTCCCACAGTTAACTGCGGTCAAGATATTTCTTGAATCAGGCGCCTTAGACCGCTCGGCCAAACAACCACTTATTTGTTGAAAGCGAGCGCGGTACAAGTAATGTTACCTCATCTGATATACAATAAAGGTGGAGCGCCAATATATACGCATTTGACTGTTCATAATTCATTGAATATAATTTATTCCTTGTTAGTACAAAAGGGTTAAACAGAAAAAGACGTGACGTTGTAACCGAGAGGATG…
3748	5306	7	7	0	0	NC_001137	337969	338206	NC_001139	857273	857825	|gene gene= TRP2 |CDS[fcd=-142](+,337945,339468) gene= TRP2 note= Trp2p;	|gene note= GO_component: cytosol [goid 0005829] [evidence NAS] |neigh_up CDS[fcd=-1243](-,855269,856306) gene= RNR4 note= Rnr4p; |neigh_down CDS[fcd=743](+,858292,858609) gene= TIM13 note= Tim13p;	CGGATATTGACTCTCTAAAGCAATTACAGCAGCAAAATGACGATAGTTCCATAAATATGTATCCCGTGTATGCGTATTTGCCATCATTGGATCTGACTCCTCACGTGGCATATCTAAAATTGGCACAATTGAACAACCCTGATAGAAAGGAATCATTTCTGTTGGAAAGTGCTAAGACAAATAATGAATTAGATCGTTATTCATTCATAGGTATCTCGCCACGCAAGACCATCAAAA	CGGTTCCCTTTCTTGCCTGAAATGCTCGTTCTAATGGAAAAAAAAAGAAATAAAGGTGGGCCTGCCCATTAGCAGGAAATTGGTACTTAATTATTGAAAAAAAAATTATTGGTTGCTAAGAGATTCGAACTCTTGCATCTTACGATACCTGAGTATTCCCACAGTTAACTGCGGTCAAGATATTTCTTGAATCAGGCGCCTTAGACCGCTCGGCCAAACAACCACTTATTTGTTGAAAGCGAGCGCGGTACAAGTAATGTTACCTCATCTGATATACAATAAAGGTGGAGCGCCAATATATACGCATTTGACTGTTCATAATTCATTGAATATAATTTATTCCTTGTTAGTACAAAAGGGTTAAACAGAAAAAGACGTGACGTTGTAACCGAGAGGATG…
3781	5306	0	2	0	0	NC_001137	363580	363621	NC_001139	857273	857825	|gene gene= RPS8B |CDS[fcd=-504](+,363096,363698) gene= RPS8B note= Rps8bp;	|gene note= GO_component: cytosol [goid 0005829] [evidence NAS] |neigh_up CDS[fcd=-1243](-,855269,856306) gene= RNR4 note= Rnr4p; |neigh_down CDS[fcd=743](+,858292,858609) gene= TIM13 note= Tim13p;	CGGTAGATTATACGCTTGTATCTCTTCCAGACCAGGTCAAT	CGGTTCCCTTTCTTGCCTGAAATGCTCGTTCTAATGGAAAAAAAAAGAAATAAAGGTGGGCCTGCCCATTAGCAGGAAATTGGTACTTAATTATTGAAAAAAAAATTATTGGTTGCTAAGAGATTCGAACTCTTGCATCTTACGATACCTGAGTATTCCCACAGTTAACTGCGGTCAAGATATTTCTTGAATCAGGCGCCTTAGACCGCTCGGCCAAACAACCACTTATTTGTTGAAAGCGAGCGCGGTACAAGTAATGTTACCTCATCTGATATACAATAAAGGTGGAGCGCCAATATATACGCATTTGACTGTTCATAATTCATTGAATATAATTTATTCCTTGTTAGTACAAAAGGGTTAAACAGAAAAAGACGTGACGTTGTAACCGAGAGGATG…
3806	5306	0	0	4	4	NC_001137	377803	377872	NC_001139	857273	857825	|neigh_up CDS[fcd=-227](-,375211,377610) gene= FLO8 note= Flo8p; |neigh_down CDS[fcd=4262](-,378758,382099) gene= KAP123 note= Kap123p;	|gene note= GO_component: cytosol [goid 0005829] [evidence NAS] |neigh_up CDS[fcd=-1243](-,855269,856306) gene= RNR4 note= Rnr4p; |neigh_down CDS[fcd=743](+,858292,858609) gene= TIM13 note= Tim13p;	CGGTCTCAAACCAACCCTCTACAACTTCATCGTGATCCCATTCTTTCTTCGTTGTCTTCCCACGCTCTT	CGGTTCCCTTTCTTGCCTGAAATGCTCGTTCTAATGGAAAAAAAAAGAAATAAAGGTGGGCCTGCCCATTAGCAGGAAATTGGTACTTAATTATTGAAAAAAAAATTATTGGTTGCTAAGAGATTCGAACTCTTGCATCTTACGATACCTGAGTATTCCCACAGTTAACTGCGGTCAAGATATTTCTTGAATCAGGCGCCTTAGACCGCTCGGCCAAACAACCACTTATTTGTTGAAAGCGAGCGCGGTACAAGTAATGTTACCTCATCTGATATACAATAAAGGTGGAGCGCCAATATATACGCATTTGACTGTTCATAATTCATTGAATATAATTTATTCCTTGTTAGTACAAAAGGGTTAAACAGAAAAAGACGTGACGTTGTAACCGAGAGGATG…
3852	5306	0	0	4	4	NC_001137	417982	418641	NC_001139	857273	857825	|gene gene= SAK1 note= synonym: PAK1 |CDS[fcd=-1034](+,417277,420705) gene= SAK1 note= Sak1p;	|gene note= GO_component: cytosol [goid 0005829] [evidence NAS] |neigh_up CDS[fcd=-1243](-,855269,856306) gene= RNR4 note= Rnr4p; |neigh_down CDS[fcd=743](+,858292,858609) gene= TIM13 note= Tim13p;	CGGATTGTATGGAATCAGATGCTAAGGGTCCCTCTTTACTAAGTTTTCAAGAAACGCGAGAGATTTTAAGAGGCGTTGTGCTCGGCTTAGAATATCTCCATTACCAAGGAATCATTCACCGAGATATTAAGCCTGCCAACTTATTAATATCAGGAGATGGCACTGTTAAGATTTCCGATTTTGGTGTTTCTTTAGCTGCTAGCAGCACGAATAGTTCCGATAGTAGCGAATCCTTAGACGAGTTAGAATTAGCCAAAACAGTGGGCACGCCTGCATTTTTTGCTCCCGAAATGTGCTTGGGTGAAGATGCATTCACCAGGTATAACTTAACAAAGGAAAATTTATTTCGTGGTTCTTGCATCTCATTCATGATAGATATTTGGGCTGTGGGTGTGACCT…	CGGTTCCCTTTCTTGCCTGAAATGCTCGTTCTAATGGAAAAAAAAAGAAATAAAGGTGGGCCTGCCCATTAGCAGGAAATTGGTACTTAATTATTGAAAAAAAAATTATTGGTTGCTAAGAGATTCGAACTCTTGCATCTTACGATACCTGAGTATTCCCACAGTTAACTGCGGTCAAGATATTTCTTGAATCAGGCGCCTTAGACCGCTCGGCCAAACAACCACTTATTTGTTGAAAGCGAGCGCGGTACAAGTAATGTTACCTCATCTGATATACAATAAAGGTGGAGCGCCAATATATACGCATTTGACTGTTCATAATTCATTGAATATAATTTATTCCTTGTTAGTACAAAAGGGTTAAACAGAAAAAGACGTGACGTTGTAACCGAGAGGATG…
3908	5306	0	0	17	17	NC_001137	467979	468039	NC_001139	857273	857825	|neigh_up CDS[fcd=-544](-,466203,467465) gene= PEA2 note= Pea2p; |neigh_down CDS[fcd=356](+,468365,468811) gene= SPI1 note= Spi1p;	|gene note= GO_component: cytosol [goid 0005829] [evidence NAS] |neigh_up CDS[fcd=-1243](-,855269,856306) gene= RNR4 note= Rnr4p; |neigh_down CDS[fcd=743](+,858292,858609) gene= TIM13 note= Tim13p;	CGGGACTGGGGGCCCCTATCGGGGCTCGAACCCGAATCCCGCGAGTATTTATTTGAAGGT	CGGTTCCCTTTCTTGCCTGAAATGCTCGTTCTAATGGAAAAAAAAAGAAATAAAGGTGGGCCTGCCCATTAGCAGGAAATTGGTACTTAATTATTGAAAAAAAAATTATTGGTTGCTAAGAGATTCGAACTCTTGCATCTTACGATACCTGAGTATTCCCACAGTTAACTGCGGTCAAGATATTTCTTGAATCAGGCGCCTTAGACCGCTCGGCCAAACAACCACTTATTTGTTGAAAGCGAGCGCGGTACAAGTAATGTTACCTCATCTGATATACAATAAAGGTGGAGCGCCAATATATACGCATTTGACTGTTCATAATTCATTGAATATAATTTATTCCTTGTTAGTACAAAAGGGTTAAACAGAAAAAGACGTGACGTTGTAACCGAGAGGATG…
3960	5306	1	1	0	0	NC_001137	515881	516180	NC_001139	857273	857825	|gene gene= DNF1 |CDS[fcd=-3291](+,512739,517454) gene= DNF1 note= Dnf1p;	|gene note= GO_component: cytosol [goid 0005829] [evidence NAS] |neigh_up CDS[fcd=-1243](-,855269,856306) gene= RNR4 note= Rnr4p; |neigh_down CDS[fcd=743](+,858292,858609) gene= TIM13 note= Tim13p;	CGGTTCAGAAGAAGAGATTTTTGAAGCTAAAAAGGATCACGAATTTCCGAAGGGTAATTACGCCATCGTTATCGATGGTGATGCTTTGAAATTGGCGCTATATGGTGAAGATATAAGAAGAAAGTTTCTTTTACTCTGCAAGAATTGTAGAGCTGTCTTATGCTGTAGAGTATCTCCATCTCAAAAAGCAGCCGTTGTTAAGTTAGTCAAGGATTCTCTAGATGTCATGACACTAGCCATCGGCGATGGTTCCAACGACGTCGCCATGATTCAATCTGCGGATGTTGGTATTGGTATTG	CGGTTCCCTTTCTTGCCTGAAATGCTCGTTCTAATGGAAAAAAAAAGAAATAAAGGTGGGCCTGCCCATTAGCAGGAAATTGGTACTTAATTATTGAAAAAAAAATTATTGGTTGCTAAGAGATTCGAACTCTTGCATCTTACGATACCTGAGTATTCCCACAGTTAACTGCGGTCAAGATATTTCTTGAATCAGGCGCCTTAGACCGCTCGGCCAAACAACCACTTATTTGTTGAAAGCGAGCGCGGTACAAGTAATGTTACCTCATCTGATATACAATAAAGGTGGAGCGCCAATATATACGCATTTGACTGTTCATAATTCATTGAATATAATTTATTCCTTGTTAGTACAAAAGGGTTAAACAGAAAAAGACGTGACGTTGTAACCGAGAGGATG…
3982	5306	0	0	3	3	NC_001137	539527	539811	NC_001139	857273	857825	|gene gene= TMT1 note= synonym: TAM1 |CDS[fcd=689](-,539459,540358) gene= TMT1 note= Tmt1p;	|gene note= GO_component: cytosol [goid 0005829] [evidence NAS] |neigh_up CDS[fcd=-1243](-,855269,856306) gene= RNR4 note= Rnr4p; |neigh_down CDS[fcd=743](+,858292,858609) gene= TIM13 note= Tim13p;	CGGCCTCCTCCTTAGTGACTCTTTAATAAACCAATCTGCTACATCTTCTTTATCTTTGTTCTTTGGATCCTGCTTCCACTGATGGTAAGCGCTCCAGGTTCTGACATAATCTGCAAACTCCACTAGGGTGACCTGCTTTCTGATTAGCAATGGCTTCTTTGTATGCTGGTGGAGTTTTACTTTGTCTCTCACATCTTCTGCACAAAAATATGAAACTTGTATATCATGGAAAAGTTCTGGGTCTAAGTGAGAGTCTTTCAGCATATTACGAAGGCGAGATCTCC	CGGTTCCCTTTCTTGCCTGAAATGCTCGTTCTAATGGAAAAAAAAAGAAATAAAGGTGGGCCTGCCCATTAGCAGGAAATTGGTACTTAATTATTGAAAAAAAAATTATTGGTTGCTAAGAGATTCGAACTCTTGCATCTTACGATACCTGAGTATTCCCACAGTTAACTGCGGTCAAGATATTTCTTGAATCAGGCGCCTTAGACCGCTCGGCCAAACAACCACTTATTTGTTGAAAGCGAGCGCGGTACAAGTAATGTTACCTCATCTGATATACAATAAAGGTGGAGCGCCAATATATACGCATTTGACTGTTCATAATTCATTGAATATAATTTATTCCTTGTTAGTACAAAAGGGTTAAACAGAAAAAGACGTGACGTTGTAACCGAGAGGATG…
4084	5306	1	1	0	0	NC_001138	53843	53920	NC_001139	857273	857825	|gene gene= ACT1 note= synonyms: ABY1, END7 gene= ACT1 note= Act1p; |neigh_up CDS[fcd=-2531](+,51350,52972) note= Yfl040wp; |neigh_down CDS[fcd=2104](-,55365,55985) gene= YPT1 note= Ypt1p;	|gene note= GO_component: cytosol [goid 0005829] [evidence NAS] |neigh_up CDS[fcd=-1243](-,855269,856306) gene= RNR4 note= Rnr4p; |neigh_down CDS[fcd=743](+,858292,858609) gene= TIM13 note= Tim13p;	CGGCCAAATCGATTCTCAAAATGGCGTGAGGTAGAGAGAAACCAGCGTAAATTGGAACGACGTGAGTAACACCATCA	CGGTTCCCTTTCTTGCCTGAAATGCTCGTTCTAATGGAAAAAAAAAGAAATAAAGGTGGGCCTGCCCATTAGCAGGAAATTGGTACTTAATTATTGAAAAAAAAATTATTGGTTGCTAAGAGATTCGAACTCTTGCATCTTACGATACCTGAGTATTCCCACAGTTAACTGCGGTCAAGATATTTCTTGAATCAGGCGCCTTAGACCGCTCGGCCAAACAACCACTTATTTGTTGAAAGCGAGCGCGGTACAAGTAATGTTACCTCATCTGATATACAATAAAGGTGGAGCGCCAATATATACGCATTTGACTGTTCATAATTCATTGAATATAATTTATTCCTTGTTAGTACAAAAGGGTTAAACAGAAAAAGACGTGACGTTGTAACCGAGAGGATG…
4137	5306	0	0	9	9	NC_001138	95329	95358	NC_001139	857273	857825	|neigh_up CDS[fcd=-335](-,93497,95008) gene= FRS2 note= Frs2p; |neigh_down CDS[fcd=621](+,95964,97496) gene= GAT1 note= Gat1p;	|gene note= GO_component: cytosol [goid 0005829] [evidence NAS] |neigh_up CDS[fcd=-1243](-,855269,856306) gene= RNR4 note= Rnr4p; |neigh_down CDS[fcd=743](+,858292,858609) gene= TIM13 note= Tim13p;	CGGGTCACCTAACTTATGGCCAAATGCGA	CGGTTCCCTTTCTTGCCTGAAATGCTCGTTCTAATGGAAAAAAAAAGAAATAAAGGTGGGCCTGCCCATTAGCAGGAAATTGGTACTTAATTATTGAAAAAAAAATTATTGGTTGCTAAGAGATTCGAACTCTTGCATCTTACGATACCTGAGTATTCCCACAGTTAACTGCGGTCAAGATATTTCTTGAATCAGGCGCCTTAGACCGCTCGGCCAAACAACCACTTATTTGTTGAAAGCGAGCGCGGTACAAGTAATGTTACCTCATCTGATATACAATAAAGGTGGAGCGCCAATATATACGCATTTGACTGTTCATAATTCATTGAATATAATTTATTCCTTGTTAGTACAAAAGGGTTAAACAGAAAAAGACGTGACGTTGTAACCGAGAGGATG…
4138	5306	1	1	40	40	NC_001138	95359	95611	NC_001139	857273	857825	|neigh_up CDS[fcd=-477](-,93497,95008) gene= FRS2 note= Frs2p; |neigh_down CDS[fcd=479](+,95964,97496) gene= GAT1 note= Gat1p;	|gene note= GO_component: cytosol [goid 0005829] [evidence NAS] |neigh_up CDS[fcd=-1243](-,855269,856306) gene= RNR4 note= Rnr4p; |neigh_down CDS[fcd=743](+,858292,858609) gene= TIM13 note= Tim13p;	CGGTCCCGCTTTCCGATTTTAGCCGCCGAAGACGTACTTGGCGCCATAATTAAAACCTAGCTTGCCCAATACTTCTGAGTTCTACGTGGTGCAAAAATATTTTTTTTTTTTTGAAAAACCTACCCTATTTCATTATAGATGCATCCATCAGTATTACGGTGTCCTCACACAACCCTGTCTCTGCACAACGTAATACCTCCTTTTCCCGTCTGCTAGCTCTCATTTCGCGGTAATCCAACTTCAACCAGCAAC	CGGTTCCCTTTCTTGCCTGAAATGCTCGTTCTAATGGAAAAAAAAAGAAATAAAGGTGGGCCTGCCCATTAGCAGGAAATTGGTACTTAATTATTGAAAAAAAAATTATTGGTTGCTAAGAGATTCGAACTCTTGCATCTTACGATACCTGAGTATTCCCACAGTTAACTGCGGTCAAGATATTTCTTGAATCAGGCGCCTTAGACCGCTCGGCCAAACAACCACTTATTTGTTGAAAGCGAGCGCGGTACAAGTAATGTTACCTCATCTGATATACAATAAAGGTGGAGCGCCAATATATACGCATTTGACTGTTCATAATTCATTGAATATAATTTATTCCTTGTTAGTACAAAAGGGTTAAACAGAAAAAGACGTGACGTTGTAACCGAGAGGATG…
4222	5306	0	1	0	24	NC_001138	166501	167510	NC_001139	857273	857825	|gene gene= UBP6 |CDS(+,165060,166559) gene= UBP6 note= Ubp6p; |gene gene= AIM13 |CDS(-,166739,167251) gene= AIM13 note= Aim13p; |gene gene= SUP11 gene= SUP11 note= GO_component: cytosol [goid 0005829] [evidence NAS]	|gene note= GO_component: cytosol [goid 0005829] [evidence NAS] |neigh_up CDS[fcd=-1243](-,855269,856306) gene= RNR4 note= Rnr4p; |neigh_down CDS[fcd=743](+,858292,858609) gene= TIM13 note= Tim13p;	CGGTGGGGGCGAAAGTGATAGTGCACTGATCTTAATGTATAAAGGATTTGGTCTGTAAGTCCATTTTTCATTTTTTCAAAATTAATAGTTTTTTCGGAATATACATATACATTTTTTTACATACACATAAAAATATTTCTCTCCCTTTTACGTTCATCCGCCAATCGATAAAAATGCATTTTATATACATGAAATGGCGAATTCTTTTTGGTCGAGTTTATGTATACTTTTTCTTATTCAACCCATAACGAGCTTCTTGAATTCTTCCATCTCTTCGTAACAATTCAATGGCTTGCCCTTATTGGCCAAAAGACACTCAGTCAATTTTGCCTTTATAGAAATGCTGCCGTTGTCGGTTTTTTTATCAGATTTACCTTTGGCACCCCCATATTTCTCCAA…	CGGTTCCCTTTCTTGCCTGAAATGCTCGTTCTAATGGAAAAAAAAAGAAATAAAGGTGGGCCTGCCCATTAGCAGGAAATTGGTACTTAATTATTGAAAAAAAAATTATTGGTTGCTAAGAGATTCGAACTCTTGCATCTTACGATACCTGAGTATTCCCACAGTTAACTGCGGTCAAGATATTTCTTGAATCAGGCGCCTTAGACCGCTCGGCCAAACAACCACTTATTTGTTGAAAGCGAGCGCGGTACAAGTAATGTTACCTCATCTGATATACAATAAAGGTGGAGCGCCAATATATACGCATTTGACTGTTCATAATTCATTGAATATAATTTATTCCTTGTTAGTACAAAAGGGTTAAACAGAAAAAGACGTGACGTTGTAACCGAGAGGATG…
4222	5307	0	0	0	1	NC_001138	166501	167510	NC_001139	857826	858130	|gene gene= UBP6 |CDS(+,165060,166559) gene= UBP6 note= Ubp6p; |gene gene= AIM13 |CDS(-,166739,167251) gene= AIM13 note= Aim13p; |gene gene= SUP11 gene= SUP11 note= GO_component: cytosol [goid 0005829] [evidence NAS]	|neigh_up CDS[fcd=-1672](-,855269,856306) gene= RNR4 note= Rnr4p; |neigh_down CDS[fcd=314](+,858292,858609) gene= TIM13 note= Tim13p;	CGGTGGGGGCGAAAGTGATAGTGCACTGATCTTAATGTATAAAGGATTTGGTCTGTAAGTCCATTTTTCATTTTTTCAAAATTAATAGTTTTTTCGGAATATACATATACATTTTTTTACATACACATAAAAATATTTCTCTCCCTTTTACGTTCATCCGCCAATCGATAAAAATGCATTTTATATACATGAAATGGCGAATTCTTTTTGGTCGAGTTTATGTATACTTTTTCTTATTCAACCCATAACGAGCTTCTTGAATTCTTCCATCTCTTCGTAACAATTCAATGGCTTGCCCTTATTGGCCAAAAGACACTCAGTCAATTTTGCCTTTATAGAAATGCTGCCGTTGTCGGTTTTTTTATCAGATTTACCTTTGGCACCCCCATATTTCTCCAA…	CGGTGTATTACCCGCAAGAATTCTGATAACGTTCAAGCTAAAACAAAACTGCTAAATGAGTTCTGAAATGGCATTTATGAGTACATATGATAGATTTGCTATGTATCAAACCTGGAACTGGCGCTAGCGCTATGGTTTCACTTCCTCATTAAACCATACCCTTGACGATTTGACAGGTCGCTACAGATTCAGAAAGAGATCATATCAATACAACAAATAAAATATAAGCGAATAAAGAGCAATGTCTTTCCCCTTTAGTCACATTACTAGCCAACGCTAATTCTTGATCTCCTTCCTCTTGTTT
4243	5306	0	0	0	1	NC_001138	180986	181313	NC_001139	857273	857825	|gene |tRNA note= GO_component: cytosol [goid 0005829] [evidence NAS] |neigh_up CDS[fcd=-414](-,177034,180735) note= Yfr016cp; |neigh_down CDS[fcd=1700](-,182262,182849) note= Yfr017cp;	|gene note= GO_component: cytosol [goid 0005829] [evidence NAS] |neigh_up CDS[fcd=-1243](-,855269,856306) gene= RNR4 note= Rnr4p; |neigh_down CDS[fcd=743](+,858292,858609) gene= TIM13 note= Tim13p;	CGGGGGCCCAACGATGGCAACGTTGGATTTTACCACTAAACCACTTGCGCTTATTGGAAGTGTTCGTGTTCTAATAAGGTCACAACAGCTCCAACATTAACCAGAAATACCTGTAAATAGCCCCGCCACGAGGCAACAATTGTCTCTGTATTCTTATCTTTCTCAATAAGCACTTATTAGTTAGTTTACATCCGAGTTCTTGAGCACTCCCCACCTTTTTAGTAGGTCTGAAGTCTTGTTTACAACAGCGGGCACCTCAAGATTGAAAGGAGTTGAGAGTTAGAATATATAATTTTGAAATTAAATTTGAAAATGATGCGATTACCA	CGGTTCCCTTTCTTGCCTGAAATGCTCGTTCTAATGGAAAAAAAAAGAAATAAAGGTGGGCCTGCCCATTAGCAGGAAATTGGTACTTAATTATTGAAAAAAAAATTATTGGTTGCTAAGAGATTCGAACTCTTGCATCTTACGATACCTGAGTATTCCCACAGTTAACTGCGGTCAAGATATTTCTTGAATCAGGCGCCTTAGACCGCTCGGCCAAACAACCACTTATTTGTTGAAAGCGAGCGCGGTACAAGTAATGTTACCTCATCTGATATACAATAAAGGTGGAGCGCCAATATATACGCATTTGACTGTTCATAATTCATTGAATATAATTTATTCCTTGTTAGTACAAAAGGGTTAAACAGAAAAAGACGTGACGTTGTAACCGAGAGGATG…
4280	5306	0	0	2	2	NC_001138	209975	210610	NC_001139	857273	857825	|gene gene= CDC14 note= synonym: OAF3 |CDS[fcd=-236](-,208401,210056) gene= CDC14 note= Cdc14p; |gene gene= SUP6 gene= SUP6 note= GO_component: cytosol [goid 0005829] [evidence NAS]	|gene note= GO_component: cytosol [goid 0005829] [evidence NAS] |neigh_up CDS[fcd=-1243](-,855269,856306) gene= RNR4 note= Rnr4p; |neigh_down CDS[fcd=743](+,858292,858609) gene= TIM13 note= Tim13p;	CGGCGTGTAATCATATGCACCGAGATATACTCTGCCTCGCAGGAACTCGATCGTGTTGTCGAGGTATACACTCCTACGCATTTTTTTTTTTTTTTTATAAGCGTACTTTGTAGTCCCAGCCTCTGTGCAATTGTTTCGTATTATACCTCGAACGAATCGGAAATATTTGGTACATTATTGTTTCAATTTCAATTTGTTTACCTTTGAACCAAGTGAAGAAAAACTTATGGTGCTAAAAGTACATTCCCCGTTGAAAGTGATACAGCTTTCTTGATTGACACAATAGCAATGGCCTTCAAATGCATATCTCTACTATCGGCTAAAAAACGAATGACTCACGTTATCAGGCTCATAGCTTGTGTGTGTGTGTGTGTGTGTGTGTGTGTGTGTGTGTGTGTG…	CGGTTCCCTTTCTTGCCTGAAATGCTCGTTCTAATGGAAAAAAAAAGAAATAAAGGTGGGCCTGCCCATTAGCAGGAAATTGGTACTTAATTATTGAAAAAAAAATTATTGGTTGCTAAGAGATTCGAACTCTTGCATCTTACGATACCTGAGTATTCCCACAGTTAACTGCGGTCAAGATATTTCTTGAATCAGGCGCCTTAGACCGCTCGGCCAAACAACCACTTATTTGTTGAAAGCGAGCGCGGTACAAGTAATGTTACCTCATCTGATATACAATAAAGGTGGAGCGCCAATATATACGCATTTGACTGTTCATAATTCATTGAATATAATTTATTCCTTGTTAGTACAAAAGGGTTAAACAGAAAAAGACGTGACGTTGTAACCGAGAGGATG…
4281	5306	0	116	0	1179	NC_001138	210611	211255	NC_001139	857273	857825	|gene gene= SUP6 gene= SUP6 note= GO_component: cytosol [goid 0005829] [evidence NAS] |gene gene= PTR3 note= synonym: SSY3 |CDS[fcd=-8](+,210925,212961) gene= PTR3 note= Ptr3p;	|gene note= GO_component: cytosol [goid 0005829] [evidence NAS] |neigh_up CDS[fcd=-1243](-,855269,856306) gene= RNR4 note= Rnr4p; |neigh_down CDS[fcd=743](+,858292,858609) gene= TIM13 note= Tim13p;	CGGGGGCGAGTCGAACGCCCGATCTCAAGATTTCGTAGTGGTAAATTACAGTCTTGCGCCTTAAACCAACTTGGCTACCGAGAGTCGTTTTTGTTGATTACTTTGCTATATAAAGATTCCTTTATCATTATTTCATGAGGCGCACTTTTGATTTTCACACCTTTTTCAAGCGGAGGAGTTATTCGTCTTATTAACATTACCATTACAGTAGTCATCAATGATTACCTTATCAGCACTGAAAAGATACCCGTAAAATTTAGCACACGCACACTCACACATACATAGGTACGAAATACACAACTGATAGGCGTTCATGCACTCTCATAGACAAAAGTGGGGCCGCCAGACGGATATAGCGAGGGTGCTCGACGATATAGAACACGACCTCTATCTACCGCA…	CGGTTCCCTTTCTTGCCTGAAATGCTCGTTCTAATGGAAAAAAAAAGAAATAAAGGTGGGCCTGCCCATTAGCAGGAAATTGGTACTTAATTATTGAAAAAAAAATTATTGGTTGCTAAGAGATTCGAACTCTTGCATCTTACGATACCTGAGTATTCCCACAGTTAACTGCGGTCAAGATATTTCTTGAATCAGGCGCCTTAGACCGCTCGGCCAAACAACCACTTATTTGTTGAAAGCGAGCGCGGTACAAGTAATGTTACCTCATCTGATATACAATAAAGGTGGAGCGCCAATATATACGCATTTGACTGTTCATAATTCATTGAATATAATTTATTCCTTGTTAGTACAAAAGGGTTAAACAGAAAAAGACGTGACGTTGTAACCGAGAGGATG…
4317	5306	0	0	2	2	NC_001138	237079	238016	NC_001139	857273	857825	|gene gene= SAP155 |CDS(+,234229,237237) gene= SAP155 note= Sap155p; |gene gene= ERJ5 |CDS(-,237355,238242) gene= ERJ5 note= Erj5p;	|gene note= GO_component: cytosol [goid 0005829] [evidence NAS] |neigh_up CDS[fcd=-1243](-,855269,856306) gene= RNR4 note= Rnr4p; |neigh_down CDS[fcd=743](+,858292,858609) gene= TIM13 note= Tim13p;	CGGAGGACAAGAACAGTAATAGTAACATTAACAATACCAACCATAATAGTAATAATAGTAATAACAACGATAATAACGATAATAATGATAATGACAATGATAATACTCGTAATTATAATGAAGATGCTGATAATGATAATGATTATGATCATGAATGATACATTGTTTTGTACTTTTCTTTAATTTGTATATATATATATTAATTTATATGTATAAGTACCATGTAGTTTTCTATTCATTCATTCATTCATCATGATAATATTACTTCTTACGTATCATTTACGTGAATAGATCACTTTACCGTTAGGCAATTCCATTTTCTTTTGGCCTTTCTTTGCAGAACCCTTTTTTACTTTGTTCCCCTTTTTTGTTTGGTTACCATCATACTTTTTACTATCC…	CGGTTCCCTTTCTTGCCTGAAATGCTCGTTCTAATGGAAAAAAAAAGAAATAAAGGTGGGCCTGCCCATTAGCAGGAAATTGGTACTTAATTATTGAAAAAAAAATTATTGGTTGCTAAGAGATTCGAACTCTTGCATCTTACGATACCTGAGTATTCCCACAGTTAACTGCGGTCAAGATATTTCTTGAATCAGGCGCCTTAGACCGCTCGGCCAAACAACCACTTATTTGTTGAAAGCGAGCGCGGTACAAGTAATGTTACCTCATCTGATATACAATAAAGGTGGAGCGCCAATATATACGCATTTGACTGTTCATAATTCATTGAATATAATTTATTCCTTGTTAGTACAAAAGGGTTAAACAGAAAAAGACGTGACGTTGTAACCGAGAGGATG…
4560	5306	1	1	0	0	NC_001139	180953	181782	NC_001139	857273	857825	|gene gene= NUP49 note= synonym: NSP49 |CDS[fcd=-661](+,180706,182124) gene= NUP49 note= Nup49p;	|gene note= GO_component: cytosol [goid 0005829] [evidence NAS] |neigh_up CDS[fcd=-1243](-,855269,856306) gene= RNR4 note= Rnr4p; |neigh_down CDS[fcd=743](+,858292,858609) gene= TIM13 note= Tim13p;	CGGAGGGGGCCTTTTCGGTAACAAACCTAACAATACGGCGAACACTGGGGGCGGGTTATTTGGCGCTAATTCGAACAGTAATTCTGGCAGTTTGTTTGGTTCCAACAATGCACAGACGAGTCGTGGTTTGTTTGGTAATAATAACACTAATAATATCAATAATAGTAGTAGTGGCATGAATAATGCAAGCGCTGGACTATTTGGCTCTAAACCTGCAGGAGGCACTTCTTTGTTCGGTAATACAAGCACCTCTTCGGCCCCTGCGCAGAACCAGGGCATGTTTGGTGCAAAACCAGCTGGTACATCTCTATTCGGCAATAATGCAGGTAATACGACCACTGGTGGAGGGTTATTTGGCTCCAAACCGACAGGAGCAACGTCTTTGTTTGGTTCATCAAA…	CGGTTCCCTTTCTTGCCTGAAATGCTCGTTCTAATGGAAAAAAAAAGAAATAAAGGTGGGCCTGCCCATTAGCAGGAAATTGGTACTTAATTATTGAAAAAAAAATTATTGGTTGCTAAGAGATTCGAACTCTTGCATCTTACGATACCTGAGTATTCCCACAGTTAACTGCGGTCAAGATATTTCTTGAATCAGGCGCCTTAGACCGCTCGGCCAAACAACCACTTATTTGTTGAAAGCGAGCGCGGTACAAGTAATGTTACCTCATCTGATATACAATAAAGGTGGAGCGCCAATATATACGCATTTGACTGTTCATAATTCATTGAATATAATTTATTCCTTGTTAGTACAAAAGGGTTAAACAGAAAAAGACGTGACGTTGTAACCGAGAGGATG…
4587	5306	1	1	0	0	NC_001139	205209	205827	NC_001139	857273	857825	|LTR note= YGLWTAU2 |gene note= GO_component: cytosol [goid 0005829] [evidence NAS] |neigh_up CDS[fcd=-2791](+,202727,203839) note= Ygl159wp; |neigh_down CDS[fcd=1520](+,207038,208576) gene= RCK1 note= Rck1p;	|gene note= GO_component: cytosol [goid 0005829] [evidence NAS] |neigh_up CDS[fcd=-1243](-,855269,856306) gene= RNR4 note= Rnr4p; |neigh_down CDS[fcd=743](+,858292,858609) gene= TIM13 note= Tim13p;	CGGAATTACTATCATATTGTTCGTAAGCAATAATAAATCAATTAGTGTGGGTGTTTTATACCTCTCTCATATGAGTATATAAAGATCCTTATTTAATTTTGATTATACTATCTTCTAGCCTTCAATTATCGACATCGCTCACTTGAGCAGTTCATCTAAGAAAAAAAGAACTATAGCTAAATAACCCAGTATTATTTGTTTCGCTGTAGGTTGTTGCACAAGGGTTTCTTCTGTGAACATTTTGAATTGTACGCTTAAGATGATAATACCTAACTGATTCCAACCTATATTAGTAGAACCGAAACATACAAATAAGTGGTTGTTTGGCCGAGCGGTCTAAGGCGCCTGATTCAAGCAATATCTTGACCGCAGTTAACTGTGGGAATACTCAGGTATCGT…	CGGTTCCCTTTCTTGCCTGAAATGCTCGTTCTAATGGAAAAAAAAAGAAATAAAGGTGGGCCTGCCCATTAGCAGGAAATTGGTACTTAATTATTGAAAAAAAAATTATTGGTTGCTAAGAGATTCGAACTCTTGCATCTTACGATACCTGAGTATTCCCACAGTTAACTGCGGTCAAGATATTTCTTGAATCAGGCGCCTTAGACCGCTCGGCCAAACAACCACTTATTTGTTGAAAGCGAGCGCGGTACAAGTAATGTTACCTCATCTGATATACAATAAAGGTGGAGCGCCAATATATACGCATTTGACTGTTCATAATTCATTGAATATAATTTATTCCTTGTTAGTACAAAAGGGTTAAACAGAAAAAGACGTGACGTTGTAACCGAGAGGATG…
4601	5306	0	0	4	4	NC_001139	217002	217390	NC_001139	857273	857825	|gene gene= PEX14 |CDS[fcd=-918](+,216278,217303) gene= PEX14 note= Pex14p;	|gene note= GO_component: cytosol [goid 0005829] [evidence NAS] |neigh_up CDS[fcd=-1243](-,855269,856306) gene= RNR4 note= Rnr4p; |neigh_down CDS[fcd=743](+,858292,858609) gene= TIM13 note= Tim13p;	CGGTAATGCGCAGGACAACAGATTATTTTCCATATCTCCTAATGGTATACCTGGCATAGATACGATTCCATCTGCGTCTGAGATTCTTGCCAAAATGGGCATGCAAGAAGAAAGTGATAAAGAAAAGGAAAACGGCAGCGATGCTAATAAAGATGACAATGCTGTTCCAGCGTGGAAAAAAGCAAGAGAACAAACTATTGATAGCAACGCCTCCATTCCAGAATGGCAAAAAAATACCGCCGCCAATGAGATCAGTGTCCCTGACTGGCAAAATGGACAGGTCGAAGACTCCATCCCATAGCGCAATTCTATGTAAGTAATTAGTTTTTTAACGGAAATTGTAATTGTAACTGTCCTAGATACTATGGACATTCAATCTGATTGTTAC	CGGTTCCCTTTCTTGCCTGAAATGCTCGTTCTAATGGAAAAAAAAAGAAATAAAGGTGGGCCTGCCCATTAGCAGGAAATTGGTACTTAATTATTGAAAAAAAAATTATTGGTTGCTAAGAGATTCGAACTCTTGCATCTTACGATACCTGAGTATTCCCACAGTTAACTGCGGTCAAGATATTTCTTGAATCAGGCGCCTTAGACCGCTCGGCCAAACAACCACTTATTTGTTGAAAGCGAGCGCGGTACAAGTAATGTTACCTCATCTGATATACAATAAAGGTGGAGCGCCAATATATACGCATTTGACTGTTCATAATTCATTGAATATAATTTATTCCTTGTTAGTACAAAAGGGTTAAACAGAAAAAGACGTGACGTTGTAACCGAGAGGATG…
4659	5306	25	25	22	22	NC_001139	272839	272985	NC_001139	857273	857825	|gene gene= MET13 note= synonym: MET11 |CDS[fcd=-386](+,272526,274328) gene= MET13 note= Met13p;	|gene note= GO_component: cytosol [goid 0005829] [evidence NAS] |neigh_up CDS[fcd=-1243](-,855269,856306) gene= RNR4 note= Rnr4p; |neigh_down CDS[fcd=743](+,858292,858609) gene= TIM13 note= Tim13p;	CGGTTGCCAGAACATCCTAGCGCTGAGAGGAGATCCTCCTAGGGACGCAGAAAACTGGACTCCCGTTGAAGGTGGCTTCCAGTATGCCAAGGACTTGATTAAGTATATCAAGTCCAAGTACGGTGACCATTTCGCTATCGGCGTTG	CGGTTCCCTTTCTTGCCTGAAATGCTCGTTCTAATGGAAAAAAAAAGAAATAAAGGTGGGCCTGCCCATTAGCAGGAAATTGGTACTTAATTATTGAAAAAAAAATTATTGGTTGCTAAGAGATTCGAACTCTTGCATCTTACGATACCTGAGTATTCCCACAGTTAACTGCGGTCAAGATATTTCTTGAATCAGGCGCCTTAGACCGCTCGGCCAAACAACCACTTATTTGTTGAAAGCGAGCGCGGTACAAGTAATGTTACCTCATCTGATATACAATAAAGGTGGAGCGCCAATATATACGCATTTGACTGTTCATAATTCATTGAATATAATTTATTCCTTGTTAGTACAAAAGGGTTAAACAGAAAAAGACGTGACGTTGTAACCGAGAGGATG…
4671	5306	19	19	2	2	NC_001139	279533	279648	NC_001139	857273	857825	|gene gene= NAB2 |CDS[fcd=939](-,278952,280529) gene= NAB2 note= Nab2p;	|gene note= GO_component: cytosol [goid 0005829] [evidence NAS] |neigh_up CDS[fcd=-1243](-,855269,856306) gene= RNR4 note= Rnr4p; |neigh_down CDS[fcd=743](+,858292,858609) gene= TIM13 note= Tim13p;	CGGTTTCCTTTTTGCCGCCAATAAATCAGCTTTTCTTTTTTGAAATTCTTCACGAGTTCTTTCCATTTCCTTCATCAACTCTTCATCTTCATTTGGATGTAAAAACTCACAAGTT	CGGTTCCCTTTCTTGCCTGAAATGCTCGTTCTAATGGAAAAAAAAAGAAATAAAGGTGGGCCTGCCCATTAGCAGGAAATTGGTACTTAATTATTGAAAAAAAAATTATTGGTTGCTAAGAGATTCGAACTCTTGCATCTTACGATACCTGAGTATTCCCACAGTTAACTGCGGTCAAGATATTTCTTGAATCAGGCGCCTTAGACCGCTCGGCCAAACAACCACTTATTTGTTGAAAGCGAGCGCGGTACAAGTAATGTTACCTCATCTGATATACAATAAAGGTGGAGCGCCAATATATACGCATTTGACTGTTCATAATTCATTGAATATAATTTATTCCTTGTTAGTACAAAAGGGTTAAACAGAAAAAGACGTGACGTTGTAACCGAGAGGATG…
4764	5306	0	0	3	3	NC_001139	371186	371354	NC_001139	857273	857825	|gene gene= HSF1 note= synonyms: MAS3, EXA3 |CDS[fcd=-2514](+,368756,371257) gene= HSF1 note= Hsf1p;	|gene note= GO_component: cytosol [goid 0005829] [evidence NAS] |neigh_up CDS[fcd=-1243](-,855269,856306) gene= RNR4 note= Rnr4p; |neigh_down CDS[fcd=743](+,858292,858609) gene= TIM13 note= Tim13p;	CGGCTATAGTCGAAATACAGGACCCGACAGAGTACAACGATCACCGCCTGCCCAAACGAGCTAAGAAATAGTACACAGGGCAAGGTCATTAAATAGCGTATATAATCATTTAATATAGTATGTTCTCGAAGCTGATCGCGTAAGGCGCAGAGCGAACTAAAAAAAATA	CGGTTCCCTTTCTTGCCTGAAATGCTCGTTCTAATGGAAAAAAAAAGAAATAAAGGTGGGCCTGCCCATTAGCAGGAAATTGGTACTTAATTATTGAAAAAAAAATTATTGGTTGCTAAGAGATTCGAACTCTTGCATCTTACGATACCTGAGTATTCCCACAGTTAACTGCGGTCAAGATATTTCTTGAATCAGGCGCCTTAGACCGCTCGGCCAAACAACCACTTATTTGTTGAAAGCGAGCGCGGTACAAGTAATGTTACCTCATCTGATATACAATAAAGGTGGAGCGCCAATATATACGCATTTGACTGTTCATAATTCATTGAATATAATTTATTCCTTGTTAGTACAAAAGGGTTAAACAGAAAAAGACGTGACGTTGTAACCGAGAGGATG…
4782	5306	0	0	4	4	NC_001139	384386	384515	NC_001139	857273	857825	|gene gene= PUS2 |CDS[fcd=-793](+,383657,384769) gene= PUS2 note= Pus2p;	|gene note= GO_component: cytosol [goid 0005829] [evidence NAS] |neigh_up CDS[fcd=-1243](-,855269,856306) gene= RNR4 note= Rnr4p; |neigh_down CDS[fcd=743](+,858292,858609) gene= TIM13 note= Tim13p;	CGGGATGGATATGTGTGCGGATCCACGGGCAGTCGTTTATGTTGCATCAGATTCGACGAATGGTAGCGCTTGCCGTACTTGCAGCCCGTTGCCAATTGCCGCCTAATATTGTACGTAACTATTTTAACG	CGGTTCCCTTTCTTGCCTGAAATGCTCGTTCTAATGGAAAAAAAAAGAAATAAAGGTGGGCCTGCCCATTAGCAGGAAATTGGTACTTAATTATTGAAAAAAAAATTATTGGTTGCTAAGAGATTCGAACTCTTGCATCTTACGATACCTGAGTATTCCCACAGTTAACTGCGGTCAAGATATTTCTTGAATCAGGCGCCTTAGACCGCTCGGCCAAACAACCACTTATTTGTTGAAAGCGAGCGCGGTACAAGTAATGTTACCTCATCTGATATACAATAAAGGTGGAGCGCCAATATATACGCATTTGACTGTTCATAATTCATTGAATATAATTTATTCCTTGTTAGTACAAAAGGGTTAAACAGAAAAAGACGTGACGTTGTAACCGAGAGGATG…
4789	5306	0	0	15	15	NC_001139	386169	386321	NC_001139	857273	857825	|gene gene= PYC1 |CDS[fcd=-1046](+,385199,388735) gene= PYC1 note= Pyc1p;	|gene note= GO_component: cytosol [goid 0005829] [evidence NAS] |neigh_up CDS[fcd=-1243](-,855269,856306) gene= RNR4 note= Rnr4p; |neigh_down CDS[fcd=743](+,858292,858609) gene= TIM13 note= Tim13p;	CGGTATAGATATTGTGGCGGCTCAGATCCAAATTGCGGCAGGTGCCTCTCTACCCCAGCTGGGCCTATTCCAGGACAAAATTACGACTCGTGGCTTTGCCATTCAGTGCCGTATTACCACGGAAGACCCTGCTAAGAACTTCCAACCAGATA	CGGTTCCCTTTCTTGCCTGAAATGCTCGTTCTAATGGAAAAAAAAAGAAATAAAGGTGGGCCTGCCCATTAGCAGGAAATTGGTACTTAATTATTGAAAAAAAAATTATTGGTTGCTAAGAGATTCGAACTCTTGCATCTTACGATACCTGAGTATTCCCACAGTTAACTGCGGTCAAGATATTTCTTGAATCAGGCGCCTTAGACCGCTCGGCCAAACAACCACTTATTTGTTGAAAGCGAGCGCGGTACAAGTAATGTTACCTCATCTGATATACAATAAAGGTGGAGCGCCAATATATACGCATTTGACTGTTCATAATTCATTGAATATAATTTATTCCTTGTTAGTACAAAAGGGTTAAACAGAAAAAGACGTGACGTTGTAACCGAGAGGATG…
4803	5306	0	0	3	3	NC_001139	394055	395699	NC_001139	857273	857825	|gene gene= RAD6 note= synonyms: PSO8, UBC2 |CDS(+,393992,394510) gene= RAD6 note= Rad6p; |gene |CDS(-,394972,395835) note= Ygl057cp;	|gene note= GO_component: cytosol [goid 0005829] [evidence NAS] |neigh_up CDS[fcd=-1243](-,855269,856306) gene= RNR4 note= Rnr4p; |neigh_down CDS[fcd=743](+,858292,858609) gene= TIM13 note= Tim13p;	CGGGTGTATCTGCTTCACCATTACCTGATAACGTCATGGTATGGAACGCCATGATTATCGGGCCAGCCGATACTCCATATGAAGACGGAACTTTTAGGTTATTGTTGGAGTTTGATGAAGAATATCCCAATAAGCCACCGCATGTCAAATTTTTGAGTGAAATGTTTCATCCCAATGTCTATGCAAATGGTGAAATTTGTTTGGATATTTTGCAGAACAGATGGACTCCAACATATGATGTCGCATCCATATTGACATCCATTCAAAGTTTATTCAACGATCCAAATCCAGCTTCGCCAGCAAACGTTGAAGCTGCAACATTATTCAAAGATCATAAATCACAGTACGTCAAAAGAGTTAAGGAGACGGTAGAGAAATCTTGGGAGGATGATATGGACG…	CGGTTCCCTTTCTTGCCTGAAATGCTCGTTCTAATGGAAAAAAAAAGAAATAAAGGTGGGCCTGCCCATTAGCAGGAAATTGGTACTTAATTATTGAAAAAAAAATTATTGGTTGCTAAGAGATTCGAACTCTTGCATCTTACGATACCTGAGTATTCCCACAGTTAACTGCGGTCAAGATATTTCTTGAATCAGGCGCCTTAGACCGCTCGGCCAAACAACCACTTATTTGTTGAAAGCGAGCGCGGTACAAGTAATGTTACCTCATCTGATATACAATAAAGGTGGAGCGCCAATATATACGCATTTGACTGTTCATAATTCATTGAATATAATTTATTCCTTGTTAGTACAAAAGGGTTAAACAGAAAAAGACGTGACGTTGTAACCGAGAGGATG…
4814	5306	0	0	0	1	NC_001139	401552	401726	NC_001139	857273	857825	|gene |tRNA note= GO_component: cytosol [goid 0005829] [evidence NAS] |LTR note= YGLWSIGMA2 |neigh_up CDS[fcd=-349](-,400874,401290) gene= ERV14 note= Erv14p; |neigh_down CDS[fcd=953](+,402592,403305) gene= PRM8 note= Prm8p;	|gene note= GO_component: cytosol [goid 0005829] [evidence NAS] |neigh_up CDS[fcd=-1243](-,855269,856306) gene= RNR4 note= Rnr4p; |neigh_down CDS[fcd=743](+,858292,858609) gene= TIM13 note= Tim13p;	CGGTCTCCACGGTGAAAGCGTGATGTGATAGCCGTTACACTATATCGGAAACAAATTAACTGAAAATGTTGTATCTCAAAATGAGATATGTCAGTATGACAATACGTCATCCTAAACGTTCATACAACACATATGAAACAACCTTATATCAAAACGAACAACATGAGATAAAAC	CGGTTCCCTTTCTTGCCTGAAATGCTCGTTCTAATGGAAAAAAAAAGAAATAAAGGTGGGCCTGCCCATTAGCAGGAAATTGGTACTTAATTATTGAAAAAAAAATTATTGGTTGCTAAGAGATTCGAACTCTTGCATCTTACGATACCTGAGTATTCCCACAGTTAACTGCGGTCAAGATATTTCTTGAATCAGGCGCCTTAGACCGCTCGGCCAAACAACCACTTATTTGTTGAAAGCGAGCGCGGTACAAGTAATGTTACCTCATCTGATATACAATAAAGGTGGAGCGCCAATATATACGCATTTGACTGTTCATAATTCATTGAATATAATTTATTCCTTGTTAGTACAAAAGGGTTAAACAGAAAAAGACGTGACGTTGTAACCGAGAGGATG…
4815	5306	0	0	0	1	NC_001139	401727	402643	NC_001139	857273	857825	|LTR note= YGLWSIGMA2 |LTR note= YGLWDELTA7 |gene gene= PRM8 |CDS[fcd=407](+,402592,403305) gene= PRM8 note= Prm8p;	|gene note= GO_component: cytosol [goid 0005829] [evidence NAS] |neigh_up CDS[fcd=-1243](-,855269,856306) gene= RNR4 note= Rnr4p; |neigh_down CDS[fcd=743](+,858292,858609) gene= TIM13 note= Tim13p;	CGGCCTTCCCTAGCTGAACTACCCAAAAGTATAAATGCCTGAACAATTAGTTTAGATCCGAGATTCCGCGCTTCCACCACTTAGTATGATTCATATTTTATATAATATATAAGATAAGTAACATTCCGTGAATTAATCTGATAAACTGTTTTGACAACTGGTTACTTACCATATATATTATTGAGAAATGGGTGGATTTTGAGATAAATGTGAGAAATGGGTGAATGTTGAGATTGTTGGAATAAAAATCCACTATCGTCTATCAACTAATAGTTATATTATCAATATATTATCATATACGGTGTTAAGATGATGACATAAGTTATGAGAAGCTGTCATCGATGTTAGAGGAAGCTGAAGTGCAAGGATTGATAATGTAATAGGATAATGAAACATATA…	CGGTTCCCTTTCTTGCCTGAAATGCTCGTTCTAATGGAAAAAAAAAGAAATAAAGGTGGGCCTGCCCATTAGCAGGAAATTGGTACTTAATTATTGAAAAAAAAATTATTGGTTGCTAAGAGATTCGAACTCTTGCATCTTACGATACCTGAGTATTCCCACAGTTAACTGCGGTCAAGATATTTCTTGAATCAGGCGCCTTAGACCGCTCGGCCAAACAACCACTTATTTGTTGAAAGCGAGCGCGGTACAAGTAATGTTACCTCATCTGATATACAATAAAGGTGGAGCGCCAATATATACGCATTTGACTGTTCATAATTCATTGAATATAATTTATTCCTTGTTAGTACAAAAGGGTTAAACAGAAAAAGACGTGACGTTGTAACCGAGAGGATG…
4870	720	0	0	1	1	NC_001139	449944	449963	NC_001134	346930	347517	|gene gene= PGD1 note= synonyms: MED3, HRS1 |CDS[fcd=9](-,448769,449962) gene= PGD1 note= Pgd1p;	|gene gene= PRP6 note= synonyms: TSM7269, RNA6 |CDS[fcd=76](-,344600,347299) gene= PRP6 note= Prp6p;	CGGTATAATCGAGTCCATT	CGGAATATCCATCCACTCACTCTCCGTTACAGCAGCTAATGATTCTTTCAAATCGGCAAATTGCCGTTTCACGTTTGAAGAATCAACTGAATTGTCATCATCCTTTTCATTAGCTCTTTTCTTTTTCTTTTGTGCTAATTTCAATTCAAGCGTTTTGAATACATTTGCAGCTTCATCATCTTCATCATCTTTCGGTTGGCTTTGAAGATGGTTGTTCAAATTTTCACGGTACCTTTTCGGTATTCTTCTTCCTTTGTCATCATTACTAACCACTTGCTTTTCTTTTGTTGAAAATCCAGTGGCTCCACGACCAATACCTGGTACGTAACCTGCAGGTGGTTCTTGATCCAAAAAAGATGGCCTCTCCATAAAATGTGACGTTTTCTTGCTGTTAAACTC…
4905	5306	0	2	0	0	NC_001139	482262	482462	NC_001139	857273	857825	|gene gene= PMA1 |CDS[fcd=309](-,479915,482671) gene= PMA1 note= Pma1p;	|gene note= GO_component: cytosol [goid 0005829] [evidence NAS] |neigh_up CDS[fcd=-1243](-,855269,856306) gene= RNR4 note= Rnr4p; |neigh_down CDS[fcd=743](+,858292,858609) gene= TIM13 note= Tim13p;	CGGCAGCCAAAATAGCAGCGGCTTCCATAACGAATTGAATTGGACCGACGAAAAACATAACGAACTTAACGACTAAAGATTCTTTTTCGTCAGCCATTTGATTCAAACCGTACTTCTTTCTTCTTTTCAAAACTTCATCGGAAGTTAAACCGTAAGATGGGTCAGTTTGTAAATATTCTTCTGGAACTGGTCTAGCTTCA	CGGTTCCCTTTCTTGCCTGAAATGCTCGTTCTAATGGAAAAAAAAAGAAATAAAGGTGGGCCTGCCCATTAGCAGGAAATTGGTACTTAATTATTGAAAAAAAAATTATTGGTTGCTAAGAGATTCGAACTCTTGCATCTTACGATACCTGAGTATTCCCACAGTTAACTGCGGTCAAGATATTTCTTGAATCAGGCGCCTTAGACCGCTCGGCCAAACAACCACTTATTTGTTGAAAGCGAGCGCGGTACAAGTAATGTTACCTCATCTGATATACAATAAAGGTGGAGCGCCAATATATACGCATTTGACTGTTCATAATTCATTGAATATAATTTATTCCTTGTTAGTACAAAAGGGTTAAACAGAAAAAGACGTGACGTTGTAACCGAGAGGATG…
4915	5306	0	0	656	656	NC_001139	486182	486582	NC_001139	857273	857825	|gene gene= PMC1 |CDS[fcd=-457](+,485925,489446) gene= PMC1 note= Pmc1p;	|gene note= GO_component: cytosol [goid 0005829] [evidence NAS] |neigh_up CDS[fcd=-1243](-,855269,856306) gene= RNR4 note= Rnr4p; |neigh_down CDS[fcd=743](+,858292,858609) gene= TIM13 note= Tim13p;	CGGTATAAAAATTATGGCGATAATTCACTTCCTGAAAGAATACCAAAGTCTTTTTTACAATTAGTATGGGCTGCTTTTAATGACAAAACAATGCAATTACTGACAGTCGCCGCTGTTGTTTCCTTTGTTTTAGGTCTATACGAACTATGGATGCAACCTCCACAGTATGATCCTGAAGGAAATAAAATTAAGCAAGTTGACTGGATTGAAGGGGTTGCTATCATGATTGCGGTCTTTGTGGTAGTTCTAGTGAGTGCCGCTAACGATTACCAGAAGGAGTTGCAATTTGCAAAGCTAAATAAAAAGAAGGAAAACCGTAAAATTATAGTCATAAGAAATGATCAGGAAATATTAATTTCCATTCACCACGTTTTAGTCGGTGATGTCATTTCATTACAAA	CGGTTCCCTTTCTTGCCTGAAATGCTCGTTCTAATGGAAAAAAAAAGAAATAAAGGTGGGCCTGCCCATTAGCAGGAAATTGGTACTTAATTATTGAAAAAAAAATTATTGGTTGCTAAGAGATTCGAACTCTTGCATCTTACGATACCTGAGTATTCCCACAGTTAACTGCGGTCAAGATATTTCTTGAATCAGGCGCCTTAGACCGCTCGGCCAAACAACCACTTATTTGTTGAAAGCGAGCGCGGTACAAGTAATGTTACCTCATCTGATATACAATAAAGGTGGAGCGCCAATATATACGCATTTGACTGTTCATAATTCATTGAATATAATTTATTCCTTGTTAGTACAAAAGGGTTAAACAGAAAAAGACGTGACGTTGTAACCGAGAGGATG…
4918	5306	2	2	0	0	NC_001139	487128	487307	NC_001139	857273	857825	|gene gene= PMC1 |CDS[fcd=-1292](+,485925,489446) gene= PMC1 note= Pmc1p;	|gene note= GO_component: cytosol [goid 0005829] [evidence NAS] |neigh_up CDS[fcd=-1243](-,855269,856306) gene= RNR4 note= Rnr4p; |neigh_down CDS[fcd=743](+,858292,858609) gene= TIM13 note= Tim13p;	CGGAAGGTTTACCATTAGCTGTAACTTTGGCCTTAGCGTTTGCAACAACAAGAATGACAAAAGACGGTAATTTAGTACGGGTTTTAAGAAGCTGTGAAACGATGGGATCTGCTACTGCAGTGTGCTCTGATAAGACTGGCACTTTGACAGAAAATGTCATGACTGTCGTTCGTGGCTTC	CGGTTCCCTTTCTTGCCTGAAATGCTCGTTCTAATGGAAAAAAAAAGAAATAAAGGTGGGCCTGCCCATTAGCAGGAAATTGGTACTTAATTATTGAAAAAAAAATTATTGGTTGCTAAGAGATTCGAACTCTTGCATCTTACGATACCTGAGTATTCCCACAGTTAACTGCGGTCAAGATATTTCTTGAATCAGGCGCCTTAGACCGCTCGGCCAAACAACCACTTATTTGTTGAAAGCGAGCGCGGTACAAGTAATGTTACCTCATCTGATATACAATAAAGGTGGAGCGCCAATATATACGCATTTGACTGTTCATAATTCATTGAATATAATTTATTCCTTGTTAGTACAAAAGGGTTAAACAGAAAAAGACGTGACGTTGTAACCGAGAGGATG…
4942	5306	1	1	0	0	NC_001139	506715	506990	NC_001139	857273	857825	|gene gene= PRP18 |CDS(+,506074,506829) gene= PRP18 note= Prp18p; |gene gene= MUQ1 note= synonym: ECT1 |CDS(+,506973,507944) gene= MUQ1 note= Muq1p;	|gene note= GO_component: cytosol [goid 0005829] [evidence NAS] |neigh_up CDS[fcd=-1243](-,855269,856306) gene= RNR4 note= Rnr4p; |neigh_down CDS[fcd=743](+,858292,858609) gene= TIM13 note= Tim13p;	CGGAATGCTGCTAACATAATGATTGATGAAAGAACGCGATTATGGATTACCAGTATTAAAAGATTAATAACTTTTGAAGAATGGTATACCAGCAACCACGATAGCTTAGCCTAATTGTTGAACTATTGTTTTCGTTATCGCGTGGCACGATATCATGCGGCCAAAATAAGAAGCAAGAATGCAGATGTTGATAGCCTTTGTTCAATTTTCCAGAGACAAATGCTTTACAGGATCGGGACTTGAAATATACTGACTGGATGACGGTAAACTTAGAT	CGGTTCCCTTTCTTGCCTGAAATGCTCGTTCTAATGGAAAAAAAAAGAAATAAAGGTGGGCCTGCCCATTAGCAGGAAATTGGTACTTAATTATTGAAAAAAAAATTATTGGTTGCTAAGAGATTCGAACTCTTGCATCTTACGATACCTGAGTATTCCCACAGTTAACTGCGGTCAAGATATTTCTTGAATCAGGCGCCTTAGACCGCTCGGCCAAACAACCACTTATTTGTTGAAAGCGAGCGCGGTACAAGTAATGTTACCTCATCTGATATACAATAAAGGTGGAGCGCCAATATATACGCATTTGACTGTTCATAATTCATTGAATATAATTTATTCCTTGTTAGTACAAAAGGGTTAAACAGAAAAAGACGTGACGTTGTAACCGAGAGGATG…
4991	5306	0	0	9	9	NC_001139	554832	555323	NC_001139	857273	857825	|gene gene= TIM21 |CDS[fcd=-106](-,554252,554971) gene= TIM21 note= Tim21p;	|gene note= GO_component: cytosol [goid 0005829] [evidence NAS] |neigh_up CDS[fcd=-1243](-,855269,856306) gene= RNR4 note= Rnr4p; |neigh_down CDS[fcd=743](+,858292,858609) gene= TIM13 note= Tim13p;	CGGTGCCATTACTATATAATCTTGTTCTAAGCAGTGACGTATGAGTTATTACCGATGAGTTCACGAAAGTATTATATCGTGGAAACAAAGGCTTTCTATGTCCTAAACGGAGTAAAGACCTAGGCAAACTTGAGCTCATTGTTTAAACTTGGAGTCAGGAAAATAATATACGAATGATTTTACCAACCTGATATCTAAAATTAAATTTAGAACTATAACCTGCTGTCACTGGCGGAAAAATACGCCCTCAGGTTTGACCTAGTAGAGCTGAACATCTTTTCACTGCTTTCTGTATCCTTTATTTATTGGAGCTTCCGAAACTTCCCAAGAAAAGTGAAGAAAAAACCAGGAAAATCAAAAGACATGACGCATATAATGTACACCTTTTTTTTTTCGCGG…	CGGTTCCCTTTCTTGCCTGAAATGCTCGTTCTAATGGAAAAAAAAAGAAATAAAGGTGGGCCTGCCCATTAGCAGGAAATTGGTACTTAATTATTGAAAAAAAAATTATTGGTTGCTAAGAGATTCGAACTCTTGCATCTTACGATACCTGAGTATTCCCACAGTTAACTGCGGTCAAGATATTTCTTGAATCAGGCGCCTTAGACCGCTCGGCCAAACAACCACTTATTTGTTGAAAGCGAGCGCGGTACAAGTAATGTTACCTCATCTGATATACAATAAAGGTGGAGCGCCAATATATACGCATTTGACTGTTCATAATTCATTGAATATAATTTATTCCTTGTTAGTACAAAAGGGTTAAACAGAAAAAGACGTGACGTTGTAACCGAGAGGATG…
5011	5306	0	0	3	3	NC_001139	581373	581863	NC_001139	857273	857825	|gene gene= NQM1 |CDS[fcd=-178](-,580439,581440) gene= NQM1 note= Nqm1p;	|gene note= GO_component: cytosol [goid 0005829] [evidence NAS] |neigh_up CDS[fcd=-1243](-,855269,856306) gene= RNR4 note= Rnr4p; |neigh_down CDS[fcd=743](+,858292,858609) gene= TIM13 note= Tim13p;	CGGCCTTTTTTAATTGTTCTAAAGATGAGGTAGCAACTTTTTGTTTTTTCTCTGAAGGTTCTGACATATTTAATTTCTTGTATATATGTGATTATTTCCTATTTTTTATGACTTACGCTAGCAAGAAATAATGATATACTTAGCATAAATATGACTGCGCTGCAAGATTGCTCTTCTTTTATATGTTGTCCACCCCATTCTAGATGGTTAGAAGGATCCACTATGCTCCCCTCATTCGCCCCTACTATGGAAGAAGAAGAGAAGGACAAAAGACGTATTTCGTTACAAGTCAAGAAGTCCGAGGAGTACAAGAGCCAAAATCAGAGCCAGAGCCAGAGCCAGATCAAGGAAAGTAACCTATAATTCCCCGCGTTAACAGTCCAGTCCCTCTTATTGAAA…	CGGTTCCCTTTCTTGCCTGAAATGCTCGTTCTAATGGAAAAAAAAAGAAATAAAGGTGGGCCTGCCCATTAGCAGGAAATTGGTACTTAATTATTGAAAAAAAAATTATTGGTTGCTAAGAGATTCGAACTCTTGCATCTTACGATACCTGAGTATTCCCACAGTTAACTGCGGTCAAGATATTTCTTGAATCAGGCGCCTTAGACCGCTCGGCCAAACAACCACTTATTTGTTGAAAGCGAGCGCGGTACAAGTAATGTTACCTCATCTGATATACAATAAAGGTGGAGCGCCAATATATACGCATTTGACTGTTCATAATTCATTGAATATAATTTATTCCTTGTTAGTACAAAAGGGTTAAACAGAAAAAGACGTGACGTTGTAACCGAGAGGATG…
5075	5306	0	0	4	4	NC_001139	642027	642217	NC_001139	857273	857825	|gene gene= TWF1 |CDS[fcd=-108](+,642014,643012) gene= TWF1 note= Twf1p;	|gene note= GO_component: cytosol [goid 0005829] [evidence NAS] |neigh_up CDS[fcd=-1243](-,855269,856306) gene= RNR4 note= Rnr4p; |neigh_down CDS[fcd=743](+,858292,858609) gene= TIM13 note= Tim13p;	CGGTATAGTCGCAGAACAAGCCTTGCTGCATTCTCTGAATGAAAATCTTTCAGCAGATGGCATCGTCATCATTATAGCCAAAATTTCCCCTGATTCTACCTCGGTACATCAAACGCAAGTCGCACGTAGCTTCGAGGAGCTGGTACAGTTGGCATCACAAGAAAGAGAACCGTTGTACATCTTCTATAAG	CGGTTCCCTTTCTTGCCTGAAATGCTCGTTCTAATGGAAAAAAAAAGAAATAAAGGTGGGCCTGCCCATTAGCAGGAAATTGGTACTTAATTATTGAAAAAAAAATTATTGGTTGCTAAGAGATTCGAACTCTTGCATCTTACGATACCTGAGTATTCCCACAGTTAACTGCGGTCAAGATATTTCTTGAATCAGGCGCCTTAGACCGCTCGGCCAAACAACCACTTATTTGTTGAAAGCGAGCGCGGTACAAGTAATGTTACCTCATCTGATATACAATAAAGGTGGAGCGCCAATATATACGCATTTGACTGTTCATAATTCATTGAATATAATTTATTCCTTGTTAGTACAAAAGGGTTAAACAGAAAAAGACGTGACGTTGTAACCGAGAGGATG…
5157	5306	0	0	2	2	NC_001139	730784	731066	NC_001139	857273	857825	|gene gene= COG2 note= synonym: SEC35 |CDS[fcd=-99](-,730038,730826) gene= COG2 note= Cog2p;	|gene note= GO_component: cytosol [goid 0005829] [evidence NAS] |neigh_up CDS[fcd=-1243](-,855269,856306) gene= RNR4 note= Rnr4p; |neigh_down CDS[fcd=743](+,858292,858609) gene= TIM13 note= Tim13p;	CGGTAAATCTAAGTCTAGTTCATCATCATTCAAAAAGTCCATTTCGCCCTGAGAGAAATTGCGACTATGACTGTTGACCATTCCCTTTTCATATTATTTATTATTCTATATTTTTTCTAAGCTTCATTTTCTTGTCCTGTTGAAAATTCCATGAAATCGAGGTAAAGGCCCGAGCAATAATAATTTTAATTTAAATAAGGCACCCTCATAAAAACGGTCTTACATCCCATTATACCTAAATACGTATTTTTTGGATCTAGAGTGTTAACTATTTCACGATTA	CGGTTCCCTTTCTTGCCTGAAATGCTCGTTCTAATGGAAAAAAAAAGAAATAAAGGTGGGCCTGCCCATTAGCAGGAAATTGGTACTTAATTATTGAAAAAAAAATTATTGGTTGCTAAGAGATTCGAACTCTTGCATCTTACGATACCTGAGTATTCCCACAGTTAACTGCGGTCAAGATATTTCTTGAATCAGGCGCCTTAGACCGCTCGGCCAAACAACCACTTATTTGTTGAAAGCGAGCGCGGTACAAGTAATGTTACCTCATCTGATATACAATAAAGGTGGAGCGCCAATATATACGCATTTGACTGTTCATAATTCATTGAATATAATTTATTCCTTGTTAGTACAAAAGGGTTAAACAGAAAAAGACGTGACGTTGTAACCGAGAGGATG…
5163	5307	1	1	0	0	NC_001139	732808	732828	NC_001139	857826	858130	|gene gene= MEP1 note= synonym: AMT1 |CDS[fcd=114](-,731454,732932) gene= MEP1 note= Mep1p;	|neigh_up CDS[fcd=-1672](-,855269,856306) gene= RNR4 note= Rnr4p; |neigh_down CDS[fcd=314](+,858292,858609) gene= TIM13 note= Tim13p;	CGGAGTACAAGAATCCCAAT	CGGTGTATTACCCGCAAGAATTCTGATAACGTTCAAGCTAAAACAAAACTGCTAAATGAGTTCTGAAATGGCATTTATGAGTACATATGATAGATTTGCTATGTATCAAACCTGGAACTGGCGCTAGCGCTATGGTTTCACTTCCTCATTAAACCATACCCTTGACGATTTGACAGGTCGCTACAGATTCAGAAAGAGATCATATCAATACAACAAATAAAATATAAGCGAATAAAGAGCAATGTCTTTCCCCTTTAGTCACATTACTAGCCAACGCTAATTCTTGATCTCCTTCCTCTTGTTT
5163	5306	2	2	0	0	NC_001139	732808	732828	NC_001139	857273	857825	|gene gene= MEP1 note= synonym: AMT1 |CDS[fcd=114](-,731454,732932) gene= MEP1 note= Mep1p;	|gene note= GO_component: cytosol [goid 0005829] [evidence NAS] |neigh_up CDS[fcd=-1243](-,855269,856306) gene= RNR4 note= Rnr4p; |neigh_down CDS[fcd=743](+,858292,858609) gene= TIM13 note= Tim13p;	CGGAGTACAAGAATCCCAAT	CGGTTCCCTTTCTTGCCTGAAATGCTCGTTCTAATGGAAAAAAAAAGAAATAAAGGTGGGCCTGCCCATTAGCAGGAAATTGGTACTTAATTATTGAAAAAAAAATTATTGGTTGCTAAGAGATTCGAACTCTTGCATCTTACGATACCTGAGTATTCCCACAGTTAACTGCGGTCAAGATATTTCTTGAATCAGGCGCCTTAGACCGCTCGGCCAAACAACCACTTATTTGTTGAAAGCGAGCGCGGTACAAGTAATGTTACCTCATCTGATATACAATAAAGGTGGAGCGCCAATATATACGCATTTGACTGTTCATAATTCATTGAATATAATTTATTCCTTGTTAGTACAAAAGGGTTAAACAGAAAAAGACGTGACGTTGTAACCGAGAGGATG…
5172	5306	7	7	0	0	NC_001139	742353	742833	NC_001139	857273	857825	|gene |CDS[fcd=-263](+,742330,745440) note= Ygr125wp;	|gene note= GO_component: cytosol [goid 0005829] [evidence NAS] |neigh_up CDS[fcd=-1243](-,855269,856306) gene= RNR4 note= Rnr4p; |neigh_down CDS[fcd=743](+,858292,858609) gene= TIM13 note= Tim13p;	CGGAGTAATTCGTCGCTTTCGGAGGCCATATCAGTTTCTTTAGGAATAAATCAAGACTCATCTGTGAACAAGATGCATAGAGCGAGTGTTAGCGCAATGTCTCCTCCATTATGCCGTTCATACATGAGCGGATTTTTTACTGGTGGAAACTCACCTATGATCAATAATTTGTCGGATTCAAAACTTCCCATCTCGAACAAACAACATCCTAAAGTGATACATGGATCAGAAAATTTGCATAGGCAGACAGCTCAACTATCCAATGAATTTTGCTCCTCTTCTGTGGAAGAAAATTCTCCCACAATTAAGGATTACATGGACATTATAGGCAATGGTGATAGAAAAGATGATCAATCTATGCGTACTATAGAAGAGAATATTGATGAAGAATATTCAGAT…	CGGTTCCCTTTCTTGCCTGAAATGCTCGTTCTAATGGAAAAAAAAAGAAATAAAGGTGGGCCTGCCCATTAGCAGGAAATTGGTACTTAATTATTGAAAAAAAAATTATTGGTTGCTAAGAGATTCGAACTCTTGCATCTTACGATACCTGAGTATTCCCACAGTTAACTGCGGTCAAGATATTTCTTGAATCAGGCGCCTTAGACCGCTCGGCCAAACAACCACTTATTTGTTGAAAGCGAGCGCGGTACAAGTAATGTTACCTCATCTGATATACAATAAAGGTGGAGCGCCAATATATACGCATTTGACTGTTCATAATTCATTGAATATAATTTATTCCTTGTTAGTACAAAAGGGTTAAACAGAAAAAGACGTGACGTTGTAACCGAGAGGATG…
5182	5306	4	4	0	0	NC_001139	749951	750115	NC_001139	857273	857825	|gene gene= UTP8 |CDS[fcd=63](-,747955,750096) gene= UTP8 note= Utp8p;	|gene note= GO_component: cytosol [goid 0005829] [evidence NAS] |neigh_up CDS[fcd=-1243](-,855269,856306) gene= RNR4 note= Rnr4p; |neigh_down CDS[fcd=743](+,858292,858609) gene= TIM13 note= Tim13p;	CGGAAATACCTAACGTTATGTTATTTGTAGATTCATTAAAGGTGCCATCTGCGACTTGAACGTAATCTGCTTGTAAAGAAAAATTGCTCAATGAAGCAATTTTTGGGAGAGTTGCTAGTCTAAATGGTTGAGACAGGGATGGCATTTTGAATCTTTACTATCCT	CGGTTCCCTTTCTTGCCTGAAATGCTCGTTCTAATGGAAAAAAAAAGAAATAAAGGTGGGCCTGCCCATTAGCAGGAAATTGGTACTTAATTATTGAAAAAAAAATTATTGGTTGCTAAGAGATTCGAACTCTTGCATCTTACGATACCTGAGTATTCCCACAGTTAACTGCGGTCAAGATATTTCTTGAATCAGGCGCCTTAGACCGCTCGGCCAAACAACCACTTATTTGTTGAAAGCGAGCGCGGTACAAGTAATGTTACCTCATCTGATATACAATAAAGGTGGAGCGCCAATATATACGCATTTGACTGTTCATAATTCATTGAATATAATTTATTCCTTGTTAGTACAAAAGGGTTAAACAGAAAAAGACGTGACGTTGTAACCGAGAGGATG…
5212	5306	1	1	0	0	NC_001139	771229	771800	NC_001139	857273	857825	|gene gene= VPS62 |CDS[fcd=-940](+,770574,771977) gene= VPS62 note= Vps62p;	|gene note= GO_component: cytosol [goid 0005829] [evidence NAS] |neigh_up CDS[fcd=-1243](-,855269,856306) gene= RNR4 note= Rnr4p; |neigh_down CDS[fcd=743](+,858292,858609) gene= TIM13 note= Tim13p;	CGGACCATGGGGAAATCATGTAGGGGACTGGGAACATTCTTTAGTACGATTCTATAAAGGAGAACCACAATATCTATGGATGAGTGCGCATGGGGGTGGTAGTGCCTATAAGTTCGAAGCCATTGAGAAAATCAAAAGATTGCGTCGTGTTGACGGTAAATTGACAAACGAGGTTATTAAGAAGCCTTTAATATTTAGTGCAAGAGGCACACATGCACATTATGCATCAGTCGGTCAACATGCGCACGATGTTCCGTTTTTCTTTATGCCATTGAGTGACTTTACTGATAGAGGGCCATTATGGGATCCTTCTTTAAACTATTATGCCTATACAGTGACTGTGGGGGAAAAAATGACACCATGCGGCGCTGAAGAAACTAAAATGGGACTAGAATGGCT…	CGGTTCCCTTTCTTGCCTGAAATGCTCGTTCTAATGGAAAAAAAAAGAAATAAAGGTGGGCCTGCCCATTAGCAGGAAATTGGTACTTAATTATTGAAAAAAAAATTATTGGTTGCTAAGAGATTCGAACTCTTGCATCTTACGATACCTGAGTATTCCCACAGTTAACTGCGGTCAAGATATTTCTTGAATCAGGCGCCTTAGACCGCTCGGCCAAACAACCACTTATTTGTTGAAAGCGAGCGCGGTACAAGTAATGTTACCTCATCTGATATACAATAAAGGTGGAGCGCCAATATATACGCATTTGACTGTTCATAATTCATTGAATATAATTTATTCCTTGTTAGTACAAAAGGGTTAAACAGAAAAAGACGTGACGTTGTAACCGAGAGGATG…
5245	5306	0	0	9	9	NC_001139	798747	798800	NC_001139	857273	857825	|gene gene= CYS4 note= synonyms: VMA41, STR4, NHS5 |CDS[fcd=-225](+,798548,800071) gene= CYS4 note= Cys4p;	|gene note= GO_component: cytosol [goid 0005829] [evidence NAS] |neigh_up CDS[fcd=-1243](-,855269,856306) gene= RNR4 note= Rnr4p; |neigh_down CDS[fcd=743](+,858292,858609) gene= TIM13 note= Tim13p;	CGGTAGAATTCATCCTTCCAGATCTACTCTGATCGAACCTACTTCTGGTAACA	CGGTTCCCTTTCTTGCCTGAAATGCTCGTTCTAATGGAAAAAAAAAGAAATAAAGGTGGGCCTGCCCATTAGCAGGAAATTGGTACTTAATTATTGAAAAAAAAATTATTGGTTGCTAAGAGATTCGAACTCTTGCATCTTACGATACCTGAGTATTCCCACAGTTAACTGCGGTCAAGATATTTCTTGAATCAGGCGCCTTAGACCGCTCGGCCAAACAACCACTTATTTGTTGAAAGCGAGCGCGGTACAAGTAATGTTACCTCATCTGATATACAATAAAGGTGGAGCGCCAATATATACGCATTTGACTGTTCATAATTCATTGAATATAATTTATTCCTTGTTAGTACAAAAGGGTTAAACAGAAAAAGACGTGACGTTGTAACCGAGAGGATG…
5246	5306	0	0	39	39	NC_001139	798801	798859	NC_001139	857273	857825	|gene gene= CYS4 note= synonyms: VMA41, STR4, NHS5 |CDS[fcd=-282](+,798548,800071) gene= CYS4 note= Cys4p;	|gene note= GO_component: cytosol [goid 0005829] [evidence NAS] |neigh_up CDS[fcd=-1243](-,855269,856306) gene= RNR4 note= Rnr4p; |neigh_down CDS[fcd=743](+,858292,858609) gene= TIM13 note= Tim13p;	CGGTATCGGTCTAGCTTTAATCGGCGCCATCAAAGGTTACAGAACTATCATCACCTTG	CGGTTCCCTTTCTTGCCTGAAATGCTCGTTCTAATGGAAAAAAAAAGAAATAAAGGTGGGCCTGCCCATTAGCAGGAAATTGGTACTTAATTATTGAAAAAAAAATTATTGGTTGCTAAGAGATTCGAACTCTTGCATCTTACGATACCTGAGTATTCCCACAGTTAACTGCGGTCAAGATATTTCTTGAATCAGGCGCCTTAGACCGCTCGGCCAAACAACCACTTATTTGTTGAAAGCGAGCGCGGTACAAGTAATGTTACCTCATCTGATATACAATAAAGGTGGAGCGCCAATATATACGCATTTGACTGTTCATAATTCATTGAATATAATTTATTCCTTGTTAGTACAAAAGGGTTAAACAGAAAAAGACGTGACGTTGTAACCGAGAGGATG…
5257	5306	2	2	0	0	NC_001139	805446	805475	NC_001139	857273	857825	|gene gene= MTR3 |CDS[fcd=566](-,805274,806026) gene= MTR3 note= Mtr3p;	|gene note= GO_component: cytosol [goid 0005829] [evidence NAS] |neigh_up CDS[fcd=-1243](-,855269,856306) gene= RNR4 note= Rnr4p; |neigh_down CDS[fcd=743](+,858292,858609) gene= TIM13 note= Tim13p;	CGGCACCTGCCATATCCACTAATTCGATG	CGGTTCCCTTTCTTGCCTGAAATGCTCGTTCTAATGGAAAAAAAAAGAAATAAAGGTGGGCCTGCCCATTAGCAGGAAATTGGTACTTAATTATTGAAAAAAAAATTATTGGTTGCTAAGAGATTCGAACTCTTGCATCTTACGATACCTGAGTATTCCCACAGTTAACTGCGGTCAAGATATTTCTTGAATCAGGCGCCTTAGACCGCTCGGCCAAACAACCACTTATTTGTTGAAAGCGAGCGCGGTACAAGTAATGTTACCTCATCTGATATACAATAAAGGTGGAGCGCCAATATATACGCATTTGACTGTTCATAATTCATTGAATATAATTTATTCCTTGTTAGTACAAAAGGGTTAAACAGAAAAAGACGTGACGTTGTAACCGAGAGGATG…
5258	5306	2	2	0	0	NC_001139	805476	805625	NC_001139	857273	857825	|gene gene= MTR3 |CDS[fcd=476](-,805274,806026) gene= MTR3 note= Mtr3p;	|gene note= GO_component: cytosol [goid 0005829] [evidence NAS] |neigh_up CDS[fcd=-1243](-,855269,856306) gene= RNR4 note= Rnr4p; |neigh_down CDS[fcd=743](+,858292,858609) gene= TIM13 note= Tim13p;	CGGCATCAGCTAAGGCTAGCGTTATACTAGTGATACAATGTGGTATGAGAGATGATATTTGAGAAGACATCATTTTGCTTTGCGAATCGTCGTCCTGAGGATTATTTGTAAGATCCTTATCATACGTTAAATAAACGAAGATATCGATG	CGGTTCCCTTTCTTGCCTGAAATGCTCGTTCTAATGGAAAAAAAAAGAAATAAAGGTGGGCCTGCCCATTAGCAGGAAATTGGTACTTAATTATTGAAAAAAAAATTATTGGTTGCTAAGAGATTCGAACTCTTGCATCTTACGATACCTGAGTATTCCCACAGTTAACTGCGGTCAAGATATTTCTTGAATCAGGCGCCTTAGACCGCTCGGCCAAACAACCACTTATTTGTTGAAAGCGAGCGCGGTACAAGTAATGTTACCTCATCTGATATACAATAAAGGTGGAGCGCCAATATATACGCATTTGACTGTTCATAATTCATTGAATATAATTTATTCCTTGTTAGTACAAAAGGGTTAAACAGAAAAAGACGTGACGTTGTAACCGAGAGGATG…
5281	5306	2	2	0	0	NC_001139	837261	837414	NC_001139	857273	857825	|gene gene= PSD2 |CDS[fcd=-190](+,837147,840563) gene= PSD2 note= Psd2p;	|gene note= GO_component: cytosol [goid 0005829] [evidence NAS] |neigh_up CDS[fcd=-1243](-,855269,856306) gene= RNR4 note= Rnr4p; |neigh_down CDS[fcd=743](+,858292,858609) gene= TIM13 note= Tim13p;	CGGTATGTTTTGTTACCACTAATACATTTTATAGTCAAAAGACGAACAAGCTCAAGAACTCAAATACACACTGGAATCAAACCTTGAGGATCAAACTTCCGAGAAATCCAACATCTGAATGGTTAAGGATTATAGTATACGACGCCCTACCAA	CGGTTCCCTTTCTTGCCTGAAATGCTCGTTCTAATGGAAAAAAAAAGAAATAAAGGTGGGCCTGCCCATTAGCAGGAAATTGGTACTTAATTATTGAAAAAAAAATTATTGGTTGCTAAGAGATTCGAACTCTTGCATCTTACGATACCTGAGTATTCCCACAGTTAACTGCGGTCAAGATATTTCTTGAATCAGGCGCCTTAGACCGCTCGGCCAAACAACCACTTATTTGTTGAAAGCGAGCGCGGTACAAGTAATGTTACCTCATCTGATATACAATAAAGGTGGAGCGCCAATATATACGCATTTGACTGTTCATAATTCATTGAATATAATTTATTCCTTGTTAGTACAAAAGGGTTAAACAGAAAAAGACGTGACGTTGTAACCGAGAGGATG…
5282	5306	8	8	0	0	NC_001139	837415	837590	NC_001139	857273	857825	|gene gene= PSD2 |CDS[fcd=-355](+,837147,840563) gene= PSD2 note= Psd2p;	|gene note= GO_component: cytosol [goid 0005829] [evidence NAS] |neigh_up CDS[fcd=-1243](-,855269,856306) gene= RNR4 note= Rnr4p; |neigh_down CDS[fcd=743](+,858292,858609) gene= TIM13 note= Tim13p;	CGGAGCTCCCCCTACTACCCCCAGTAGACCAAGGACAACCACTGCAAATACATCTTCATCGACACTGTCAAATTCAGGGCTAAGTTCTCACTCTCATTCGTCGAGAAATTTGAATGTTACGTCCAAAGGTAATCAAACTTCAACATCAATTAATTCAGTATCATCTTCAGCTACA	CGGTTCCCTTTCTTGCCTGAAATGCTCGTTCTAATGGAAAAAAAAAGAAATAAAGGTGGGCCTGCCCATTAGCAGGAAATTGGTACTTAATTATTGAAAAAAAAATTATTGGTTGCTAAGAGATTCGAACTCTTGCATCTTACGATACCTGAGTATTCCCACAGTTAACTGCGGTCAAGATATTTCTTGAATCAGGCGCCTTAGACCGCTCGGCCAAACAACCACTTATTTGTTGAAAGCGAGCGCGGTACAAGTAATGTTACCTCATCTGATATACAATAAAGGTGGAGCGCCAATATATACGCATTTGACTGTTCATAATTCATTGAATATAATTTATTCCTTGTTAGTACAAAAGGGTTAAACAGAAAAAGACGTGACGTTGTAACCGAGAGGATG…
5283	5306	2	2	0	0	NC_001139	837591	837633	NC_001139	857273	857825	|gene gene= PSD2 |CDS[fcd=-465](+,837147,840563) gene= PSD2 note= Psd2p;	|gene note= GO_component: cytosol [goid 0005829] [evidence NAS] |neigh_up CDS[fcd=-1243](-,855269,856306) gene= RNR4 note= Rnr4p; |neigh_down CDS[fcd=743](+,858292,858609) gene= TIM13 note= Tim13p;	CGGCCCCTTCACATTCTTCCTCTTCTCTCTCAACAACAGGTC	CGGTTCCCTTTCTTGCCTGAAATGCTCGTTCTAATGGAAAAAAAAAGAAATAAAGGTGGGCCTGCCCATTAGCAGGAAATTGGTACTTAATTATTGAAAAAAAAATTATTGGTTGCTAAGAGATTCGAACTCTTGCATCTTACGATACCTGAGTATTCCCACAGTTAACTGCGGTCAAGATATTTCTTGAATCAGGCGCCTTAGACCGCTCGGCCAAACAACCACTTATTTGTTGAAAGCGAGCGCGGTACAAGTAATGTTACCTCATCTGATATACAATAAAGGTGGAGCGCCAATATATACGCATTTGACTGTTCATAATTCATTGAATATAATTTATTCCTTGTTAGTACAAAAGGGTTAAACAGAAAAAGACGTGACGTTGTAACCGAGAGGATG…
5287	5306	1	1	0	0	NC_001139	839795	839939	NC_001139	857273	857825	|gene gene= PSD2 |CDS[fcd=-2720](+,837147,840563) gene= PSD2 note= Psd2p;	|gene note= GO_component: cytosol [goid 0005829] [evidence NAS] |neigh_up CDS[fcd=-1243](-,855269,856306) gene= RNR4 note= Rnr4p; |neigh_down CDS[fcd=743](+,858292,858609) gene= TIM13 note= Tim13p;	CGGCTGCCTGAAAGTAATAATAAAGAAATATTGTTTTCACCAGCAGATTCAAGATGCACAGTGTTCCCAACTATACAAGAATCGAAGGAAATATGGGTGAAAGGAAGAAAATTTTCTATTAAGAAACTAGCCAATAACTATAAT	CGGTTCCCTTTCTTGCCTGAAATGCTCGTTCTAATGGAAAAAAAAAGAAATAAAGGTGGGCCTGCCCATTAGCAGGAAATTGGTACTTAATTATTGAAAAAAAAATTATTGGTTGCTAAGAGATTCGAACTCTTGCATCTTACGATACCTGAGTATTCCCACAGTTAACTGCGGTCAAGATATTTCTTGAATCAGGCGCCTTAGACCGCTCGGCCAAACAACCACTTATTTGTTGAAAGCGAGCGCGGTACAAGTAATGTTACCTCATCTGATATACAATAAAGGTGGAGCGCCAATATATACGCATTTGACTGTTCATAATTCATTGAATATAATTTATTCCTTGTTAGTACAAAAGGGTTAAACAGAAAAAGACGTGACGTTGTAACCGAGAGGATG…
5288	5306	1	1	27	27	NC_001139	839940	840004	NC_001139	857273	857825	|gene gene= PSD2 |CDS[fcd=-2825](+,837147,840563) gene= PSD2 note= Psd2p;	|gene note= GO_component: cytosol [goid 0005829] [evidence NAS] |neigh_up CDS[fcd=-1243](-,855269,856306) gene= RNR4 note= Rnr4p; |neigh_down CDS[fcd=743](+,858292,858609) gene= TIM13 note= Tim13p;	CGGAAACATTTAATGACAATAACTGCAGTATTGGTATATTTAGACTGGCGCCACAAGATTATCA	CGGTTCCCTTTCTTGCCTGAAATGCTCGTTCTAATGGAAAAAAAAAGAAATAAAGGTGGGCCTGCCCATTAGCAGGAAATTGGTACTTAATTATTGAAAAAAAAATTATTGGTTGCTAAGAGATTCGAACTCTTGCATCTTACGATACCTGAGTATTCCCACAGTTAACTGCGGTCAAGATATTTCTTGAATCAGGCGCCTTAGACCGCTCGGCCAAACAACCACTTATTTGTTGAAAGCGAGCGCGGTACAAGTAATGTTACCTCATCTGATATACAATAAAGGTGGAGCGCCAATATATACGCATTTGACTGTTCATAATTCATTGAATATAATTTATTCCTTGTTAGTACAAAAGGGTTAAACAGAAAAAGACGTGACGTTGTAACCGAGAGGATG…
5290	5306	1	1	10	10	NC_001139	841913	845109	NC_001139	857273	857825	|gene gene= MSM1 |CDS(-,840829,842556) gene= MSM1 note= Msm1p; |gene gene= YIP1 |CDS(-,842850,843596) gene= YIP1 note= Yip1p; |gene gene= RBG2 note= synonym: GIR1 |CDS(+,843859,844965) gene= RBG2 note= Rbg2p;	|gene note= GO_component: cytosol [goid 0005829] [evidence NAS] |neigh_up CDS[fcd=-1243](-,855269,856306) gene= RNR4 note= Rnr4p; |neigh_down CDS[fcd=743](+,858292,858609) gene= TIM13 note= Tim13p;	CGGTTTCTAGTTCTTTTAGAATTTGGTCTCTTTTAGAAGCAGGAAAAATGAAATCTGGATTCTTTCTTATATGGTCAACTATTTTCTTGTTAAATAAGGATAGCCTAAAGAAGTAATTTGTCTCTGACTGATAAACTACTTCGTTTTTCGATTCTGTATTCAGATACTTACCATCATTTTTGGGGTCTTTAATAACCTTGGATTCAGGATAGAATGTTTCATCAGAAATGGAATACCAACCCTTATGTTCGCCCATGTAAATATAGCCATTTTTCAAACAAAGTTCCCATAATTTCATCACGTTTTCAATGTGGTCAGGATCCGTAGTCCTTATAAATCTTGTATAATTAATGCCATATATTTTGTCTAATTGAACAAACTCTGGGTATAGCTTATCGA…	CGGTTCCCTTTCTTGCCTGAAATGCTCGTTCTAATGGAAAAAAAAAGAAATAAAGGTGGGCCTGCCCATTAGCAGGAAATTGGTACTTAATTATTGAAAAAAAAATTATTGGTTGCTAAGAGATTCGAACTCTTGCATCTTACGATACCTGAGTATTCCCACAGTTAACTGCGGTCAAGATATTTCTTGAATCAGGCGCCTTAGACCGCTCGGCCAAACAACCACTTATTTGTTGAAAGCGAGCGCGGTACAAGTAATGTTACCTCATCTGATATACAATAAAGGTGGAGCGCCAATATATACGCATTTGACTGTTCATAATTCATTGAATATAATTTATTCCTTGTTAGTACAAAAGGGTTAAACAGAAAAAGACGTGACGTTGTAACCGAGAGGATG…
5294	5306	1	1	0	0	NC_001139	846441	846601	NC_001139	857273	857825	|neigh_up CDS[fcd=-111](-,845898,846410) gene= CBP4 note= Cbp4p; |neigh_down CDS[fcd=139](+,846660,846746) note= Ygr174w-ap;	|gene note= GO_component: cytosol [goid 0005829] [evidence NAS] |neigh_up CDS[fcd=-1243](-,855269,856306) gene= RNR4 note= Rnr4p; |neigh_down CDS[fcd=743](+,858292,858609) gene= TIM13 note= Tim13p;	CGGGGGATGAGCAAAAAAAGGGATATGGGGAATGAAAAGTGAGATAAACTAGCAATAATCTATTCTAATAAGTAGAACATTCACAAAGACTACTATGGTGTAATTCTGAAAGGATTTACGAGAGCACAAATACTATTATGTATAATTCTGACTGCAGAAT	CGGTTCCCTTTCTTGCCTGAAATGCTCGTTCTAATGGAAAAAAAAAGAAATAAAGGTGGGCCTGCCCATTAGCAGGAAATTGGTACTTAATTATTGAAAAAAAAATTATTGGTTGCTAAGAGATTCGAACTCTTGCATCTTACGATACCTGAGTATTCCCACAGTTAACTGCGGTCAAGATATTTCTTGAATCAGGCGCCTTAGACCGCTCGGCCAAACAACCACTTATTTGTTGAAAGCGAGCGCGGTACAAGTAATGTTACCTCATCTGATATACAATAAAGGTGGAGCGCCAATATATACGCATTTGACTGTTCATAATTCATTGAATATAATTTATTCCTTGTTAGTACAAAAGGGTTAAACAGAAAAAGACGTGACGTTGTAACCGAGAGGATG…
5298	5306	4	4	0	0	NC_001139	852415	852993	NC_001139	857273	857825	|gene gene= PBP1 note= synonym: MRS16 |CDS[fcd=516](-,851052,853220) gene= PBP1 note= Pbp1p;	|gene note= GO_component: cytosol [goid 0005829] [evidence NAS] |neigh_up CDS[fcd=-1243](-,855269,856306) gene= RNR4 note= Rnr4p; |neigh_down CDS[fcd=743](+,858292,858609) gene= TIM13 note= Tim13p;	CGGAAGTTCCTTGCGATTCAATTTCCTTAGCGATTCTTTCGGCTTCTTGCAACCTCTTACTGTAATTAGGGTCATCCTTGTTAATCTTTGTTGTATACAAATGTTCATCAAAAGTTGACTTTACGCCAAACTTTTTCTCGTTCACAGCAAATTGATCCCAACTGGCAGAATCGTCTTCCAAAGCTTTACCCTTGTTGATATCAAAATGTTCCGCGCCTTCTTCGGGTGTCCATTTTTCTAACTTACGCTCCTTAATTTCTCTACCAGAACCAGAAATATCAACATCAGTCCTGAATTTCGTAACTTCATTCGATTCTCCATTTACCCTTTCCTTTTCAATATTTGTTCTGGCGGGCGTTGTTTCTTGGGCTTTGGAATTTTCCCATTTCTCATCAAGAG…	CGGTTCCCTTTCTTGCCTGAAATGCTCGTTCTAATGGAAAAAAAAAGAAATAAAGGTGGGCCTGCCCATTAGCAGGAAATTGGTACTTAATTATTGAAAAAAAAATTATTGGTTGCTAAGAGATTCGAACTCTTGCATCTTACGATACCTGAGTATTCCCACAGTTAACTGCGGTCAAGATATTTCTTGAATCAGGCGCCTTAGACCGCTCGGCCAAACAACCACTTATTTGTTGAAAGCGAGCGCGGTACAAGTAATGTTACCTCATCTGATATACAATAAAGGTGGAGCGCCAATATATACGCATTTGACTGTTCATAATTCATTGAATATAATTTATTCCTTGTTAGTACAAAAGGGTTAAACAGAAAAAGACGTGACGTTGTAACCGAGAGGATG…
5299	5306	9	9	0	0	NC_001139	852994	853596	NC_001139	857273	857825	|gene gene= PBP1 note= synonym: MRS16 |CDS[fcd=-75](-,851052,853220) gene= PBP1 note= Pbp1p;	|gene note= GO_component: cytosol [goid 0005829] [evidence NAS] |neigh_up CDS[fcd=-1243](-,855269,856306) gene= RNR4 note= Rnr4p; |neigh_down CDS[fcd=743](+,858292,858609) gene= TIM13 note= Tim13p;	CGGTATATTTCACACCTGAAGTAACAGTTACTGTTACATCAGAGCCTATACTATTGGCTAACAAATAATCTTGACGGTCATCAAAGTTTCTCGTAATTTCAGGGTTCTCATAGAACATTGAACTGTTGTTTTGATTAGGGACGCCTCCATTCGTATAATTGCTGTCAGAATTACCACCCTTTCTTGAGTTGGTGGAGCTATCTCTTTTCCTAAAGTTTCCCTTCATATTGTTTCAATGTAATGAACTCCTTTAATTACTTCCGTGACTGAGGATGTCAGTTTTTATATCAAATCAATTTTCAAAGATTTAATTATTGCTTCCCCTTCAAGATCAATTCGGAAATAATCGAAACGTCTTCTGGAAAGAACAAAAAGAAAGATAGAAGAAAACGCGAGTGA…	CGGTTCCCTTTCTTGCCTGAAATGCTCGTTCTAATGGAAAAAAAAAGAAATAAAGGTGGGCCTGCCCATTAGCAGGAAATTGGTACTTAATTATTGAAAAAAAAATTATTGGTTGCTAAGAGATTCGAACTCTTGCATCTTACGATACCTGAGTATTCCCACAGTTAACTGCGGTCAAGATATTTCTTGAATCAGGCGCCTTAGACCGCTCGGCCAAACAACCACTTATTTGTTGAAAGCGAGCGCGGTACAAGTAATGTTACCTCATCTGATATACAATAAAGGTGGAGCGCCAATATATACGCATTTGACTGTTCATAATTCATTGAATATAATTTATTCCTTGTTAGTACAAAAGGGTTAAACAGAAAAAGACGTGACGTTGTAACCGAGAGGATG…
5300	5306	3	3	0	0	NC_001139	853597	854159	NC_001139	857273	857825	|gene gene= OKP1 |CDS[fcd=1022](-,853680,854900) gene= OKP1 note= Okp1p;	|gene note= GO_component: cytosol [goid 0005829] [evidence NAS] |neigh_up CDS[fcd=-1243](-,855269,856306) gene= RNR4 note= Rnr4p; |neigh_down CDS[fcd=743](+,858292,858609) gene= TIM13 note= Tim13p;	CGGATGCTAATAGTGCATGATTATATATCAAATATTTAGTTATATGCATCGTAATCGTAAACTCTGAAACAATGGATTATCGCTAGTGTATATCTTCTTCGGTCTTATCTTGGTGCGACTCATGGTGCGGTACAAAAACCTCTTTGATTTCTTCTTCATGTGAATCCGAAATCATTTGACCCATTGTTTCCTTAAGTTCCTTTGATTTCTTCGTATATTCTTTCAAAGAAGGTAACAACGACAGTACTTCCTCCTTATCAAGCCTCACATCGGCTGTACTTTTTATGGGGTCGTTCAACATCAGGTTCAATTCGTGGCTATCATTTCTAAAAGTTACTGGGCCATCAGGATGCATAAATCCATTAGTAGATTCTAAGCCATATGTATATTCCATTGCTT…	CGGTTCCCTTTCTTGCCTGAAATGCTCGTTCTAATGGAAAAAAAAAGAAATAAAGGTGGGCCTGCCCATTAGCAGGAAATTGGTACTTAATTATTGAAAAAAAAATTATTGGTTGCTAAGAGATTCGAACTCTTGCATCTTACGATACCTGAGTATTCCCACAGTTAACTGCGGTCAAGATATTTCTTGAATCAGGCGCCTTAGACCGCTCGGCCAAACAACCACTTATTTGTTGAAAGCGAGCGCGGTACAAGTAATGTTACCTCATCTGATATACAATAAAGGTGGAGCGCCAATATATACGCATTTGACTGTTCATAATTCATTGAATATAATTTATTCCTTGTTAGTACAAAAGGGTTAAACAGAAAAAGACGTGACGTTGTAACCGAGAGGATG…
5301	5306	5	5	111	111	NC_001139	854160	855035	NC_001139	857273	857825	|gene gene= OKP1 |CDS[fcd=303](-,853680,854900) gene= OKP1 note= Okp1p;	|gene note= GO_component: cytosol [goid 0005829] [evidence NAS] |neigh_up CDS[fcd=-1243](-,855269,856306) gene= RNR4 note= Rnr4p; |neigh_down CDS[fcd=743](+,858292,858609) gene= TIM13 note= Tim13p;	CGGTTTTGAATAAATTGTCGCTTAGAATAAATATACTCGATGTCTAGATCTCTTTCCGATATCCTAGAGGGAAATTTGGCCTGTCTTAGCTTCTTCTTTATCTTTGTGAGGATTATTTCAAGCAAACGTTCCTTCTTAGAATATATTCTTTTAACCTCATTATTATCGCCATGCGTCATTTGGTTCATTTCCTTTTCGTACTTCTCAAAGACAGAATCAAGAGCGCTTACAGTGTTAGTCTCTAATAAACGAAGTATGGATCCTATCATTATTTTAGAAGGCTTTTTCCAATGCTTTAATTCATAATTGCGCGGCAACCTTTCTCTATACTCAGCTTGTATTACCTTCCTGAATTCCCAAGGTCGTACATTGCCCTCTCCACTTGTTGCGCTTCCATCC…	CGGTTCCCTTTCTTGCCTGAAATGCTCGTTCTAATGGAAAAAAAAAGAAATAAAGGTGGGCCTGCCCATTAGCAGGAAATTGGTACTTAATTATTGAAAAAAAAATTATTGGTTGCTAAGAGATTCGAACTCTTGCATCTTACGATACCTGAGTATTCCCACAGTTAACTGCGGTCAAGATATTTCTTGAATCAGGCGCCTTAGACCGCTCGGCCAAACAACCACTTATTTGTTGAAAGCGAGCGCGGTACAAGTAATGTTACCTCATCTGATATACAATAAAGGTGGAGCGCCAATATATACGCATTTGACTGTTCATAATTCATTGAATATAATTTATTCCTTGTTAGTACAAAAGGGTTAAACAGAAAAAGACGTGACGTTGTAACCGAGAGGATG…
5302	5307	1	1	0	0	NC_001139	855036	855070	NC_001139	857826	858130	|neigh_up CDS[fcd=-153](-,853680,854900) gene= OKP1 note= Okp1p; |neigh_down CDS[fcd=1253](-,855269,856306) gene= RNR4 note= Rnr4p;	|neigh_up CDS[fcd=-1672](-,855269,856306) gene= RNR4 note= Rnr4p; |neigh_down CDS[fcd=314](+,858292,858609) gene= TIM13 note= Tim13p;	CGGGTAACAAAAATATGTTATTTAAATGAAATGA	CGGTGTATTACCCGCAAGAATTCTGATAACGTTCAAGCTAAAACAAAACTGCTAAATGAGTTCTGAAATGGCATTTATGAGTACATATGATAGATTTGCTATGTATCAAACCTGGAACTGGCGCTAGCGCTATGGTTTCACTTCCTCATTAAACCATACCCTTGACGATTTGACAGGTCGCTACAGATTCAGAAAGAGATCATATCAATACAACAAATAAAATATAAGCGAATAAAGAGCAATGTCTTTCCCCTTTAGTCACATTACTAGCCAACGCTAATTCTTGATCTCCTTCCTCTTGTTT
5302	5306	16	16	15	15	NC_001139	855036	855070	NC_001139	857273	857825	|neigh_up CDS[fcd=-153](-,853680,854900) gene= OKP1 note= Okp1p; |neigh_down CDS[fcd=1253](-,855269,856306) gene= RNR4 note= Rnr4p;	|gene note= GO_component: cytosol [goid 0005829] [evidence NAS] |neigh_up CDS[fcd=-1243](-,855269,856306) gene= RNR4 note= Rnr4p; |neigh_down CDS[fcd=743](+,858292,858609) gene= TIM13 note= Tim13p;	CGGGTAACAAAAATATGTTATTTAAATGAAATGA	CGGTTCCCTTTCTTGCCTGAAATGCTCGTTCTAATGGAAAAAAAAAGAAATAAAGGTGGGCCTGCCCATTAGCAGGAAATTGGTACTTAATTATTGAAAAAAAAATTATTGGTTGCTAAGAGATTCGAACTCTTGCATCTTACGATACCTGAGTATTCCCACAGTTAACTGCGGTCAAGATATTTCTTGAATCAGGCGCCTTAGACCGCTCGGCCAAACAACCACTTATTTGTTGAAAGCGAGCGCGGTACAAGTAATGTTACCTCATCTGATATACAATAAAGGTGGAGCGCCAATATATACGCATTTGACTGTTCATAATTCATTGAATATAATTTATTCCTTGTTAGTACAAAAGGGTTAAACAGAAAAAGACGTGACGTTGTAACCGAGAGGATG…
5303	5306	7	7	0	0	NC_001139	855071	856815	NC_001139	857273	857825	|gene gene= RNR4 note= synonyms: PSO3, CRT3 |CDS[fcd=363](-,855269,856306) gene= RNR4 note= Rnr4p;	|gene note= GO_component: cytosol [goid 0005829] [evidence NAS] |neigh_up CDS[fcd=-1243](-,855269,856306) gene= RNR4 note= Rnr4p; |neigh_down CDS[fcd=743](+,858292,858609) gene= TIM13 note= Tim13p;	CGGGATGATGGTACTCTCTGAATCTTTCCCTTATCTACCTACAAGAAAATGGCAAATATTGTCATAATAAATATAAAAAAAAACTGTAGTTTCTTTTTAAATTTTTCTACTTAAGTTTAGTTATACTGTACCTAGGTATATATAAATATATATAAATAAAAGTGGCCAAGAATAAAAGAACGCACCCCGTCGTTGACTTAGAAGTCATCATCAAAGTTAATTTCCTTGGATGGGGTAGCGGACTTAGACATGTCACTGGCCTTTTGGTAGTCGGAAACCTTCTTTTCAAAGAAGGTGGTCTTACCAGCGGTAGCGACATCCTCCATGAATTCGAATGGGTTGACGGCGTTGTAGTATTTTTCGTTACCGAAACCTTGTAATAGACCGTCAGCGACAAAT…	CGGTTCCCTTTCTTGCCTGAAATGCTCGTTCTAATGGAAAAAAAAAGAAATAAAGGTGGGCCTGCCCATTAGCAGGAAATTGGTACTTAATTATTGAAAAAAAAATTATTGGTTGCTAAGAGATTCGAACTCTTGCATCTTACGATACCTGAGTATTCCCACAGTTAACTGCGGTCAAGATATTTCTTGAATCAGGCGCCTTAGACCGCTCGGCCAAACAACCACTTATTTGTTGAAAGCGAGCGCGGTACAAGTAATGTTACCTCATCTGATATACAATAAAGGTGGAGCGCCAATATATACGCATTTGACTGTTCATAATTCATTGAATATAATTTATTCCTTGTTAGTACAAAAGGGTTAAACAGAAAAAGACGTGACGTTGTAACCGAGAGGATG…
5305	679	1	1	0	0	NC_001139	856823	857272	NC_001134	315411	315438	|neigh_up CDS[fcd=-741](-,855269,856306) gene= RNR4 note= Rnr4p; |neigh_down CDS[fcd=1245](+,858292,858609) gene= TIM13 note= Tim13p;	|neigh_up CDS[fcd=-3527](+,311897,314788) gene= CHS2 note= Chs2p; |neigh_down CDS[fcd=151](+,315575,316510) gene= ATP3 note= Atp3p;	CGGTGCTTGGTGTTGGGTGGTCGTACCTGCTAGTTCCATTGGTGCGGTGTATGGGCGGGTACCCTCAAAAAGGGAAACGAAGGTAGGCGCACGGTGCTTATTAAGCTCAGAGGCGACCTCGCAGAAGGGGGCAGACCACACAAGCGGTGGAGGCGCTCCAGATATTCAGTGGAGTGGGGCTTGCTCATGTTCTGTTGTTGGTTTTGGATAGAAAAAGAGCGGGTTGAATAGTTTGCCATGGCAACCACTCTGGAAGCGAAATCACATAGACGCGTAAACACTCACACACAGGATATTCGTATAGCAAGGTACTAGTGGCGACACTCAGGTGGTCCTCGTTGCCTTATCTCCAGATTCCTCAATTTCTGTGAAACGTAAACATTATGGGAATAGTCTAGA…	CGGACCGCAATAACGATTAAAGAAGGC
5305	5306	47386	47386	105281	105281	NC_001139	856823	857272	NC_001139	857273	857825	|neigh_up CDS[fcd=-741](-,855269,856306) gene= RNR4 note= Rnr4p; |neigh_down CDS[fcd=1245](+,858292,858609) gene= TIM13 note= Tim13p;	|gene note= GO_component: cytosol [goid 0005829] [evidence NAS] |neigh_up CDS[fcd=-1243](-,855269,856306) gene= RNR4 note= Rnr4p; |neigh_down CDS[fcd=743](+,858292,858609) gene= TIM13 note= Tim13p;	CGGTGCTTGGTGTTGGGTGGTCGTACCTGCTAGTTCCATTGGTGCGGTGTATGGGCGGGTACCCTCAAAAAGGGAAACGAAGGTAGGCGCACGGTGCTTATTAAGCTCAGAGGCGACCTCGCAGAAGGGGGCAGACCACACAAGCGGTGGAGGCGCTCCAGATATTCAGTGGAGTGGGGCTTGCTCATGTTCTGTTGTTGGTTTTGGATAGAAAAAGAGCGGGTTGAATAGTTTGCCATGGCAACCACTCTGGAAGCGAAATCACATAGACGCGTAAACACTCACACACAGGATATTCGTATAGCAAGGTACTAGTGGCGACACTCAGGTGGTCCTCGTTGCCTTATCTCCAGATTCCTCAATTTCTGTGAAACGTAAACATTATGGGAATAGTCTAGA…	CGGTTCCCTTTCTTGCCTGAAATGCTCGTTCTAATGGAAAAAAAAAGAAATAAAGGTGGGCCTGCCCATTAGCAGGAAATTGGTACTTAATTATTGAAAAAAAAATTATTGGTTGCTAAGAGATTCGAACTCTTGCATCTTACGATACCTGAGTATTCCCACAGTTAACTGCGGTCAAGATATTTCTTGAATCAGGCGCCTTAGACCGCTCGGCCAAACAACCACTTATTTGTTGAAAGCGAGCGCGGTACAAGTAATGTTACCTCATCTGATATACAATAAAGGTGGAGCGCCAATATATACGCATTTGACTGTTCATAATTCATTGAATATAATTTATTCCTTGTTAGTACAAAAGGGTTAAACAGAAAAAGACGTGACGTTGTAACCGAGAGGATG…
5306	11243	3	3	0	0	NC_001139	857273	857825	NC_001146	480402	480818	|gene note= GO_component: cytosol [goid 0005829] [evidence NAS] |neigh_up CDS[fcd=-1243](-,855269,856306) gene= RNR4 note= Rnr4p; |neigh_down CDS[fcd=743](+,858292,858609) gene= TIM13 note= Tim13p;	|gene gene= NIS1 note= synonym: JIP1 |CDS[fcd=-841](+,479769,480992) gene= NIS1 note= Nis1p;	CGGTTCCCTTTCTTGCCTGAAATGCTCGTTCTAATGGAAAAAAAAAGAAATAAAGGTGGGCCTGCCCATTAGCAGGAAATTGGTACTTAATTATTGAAAAAAAAATTATTGGTTGCTAAGAGATTCGAACTCTTGCATCTTACGATACCTGAGTATTCCCACAGTTAACTGCGGTCAAGATATTTCTTGAATCAGGCGCCTTAGACCGCTCGGCCAAACAACCACTTATTTGTTGAAAGCGAGCGCGGTACAAGTAATGTTACCTCATCTGATATACAATAAAGGTGGAGCGCCAATATATACGCATTTGACTGTTCATAATTCATTGAATATAATTTATTCCTTGTTAGTACAAAAGGGTTAAACAGAAAAAGACGTGACGTTGTAACCGAGAGGATG…	CGGTAAACTTACACGCTATCAGAAATCTCACTAGCAGGGACCCTGCGGTAACTCCTATCCCATTTTTAAGAAGCCAGATGTATGCAACCAGTAGTCGTCCACCGTATCTAAGGAACCGCTCCATAAGTAGGAAACTACCCAAATCACAACCAGGTAGTCTCCCGACGACTATGCCTGCGACGGCGACGAAAACAATTAAACAGAATTCAACGACCCCAACCACAAGATCTGTTTATAACAAGAATGTGGGGCGGTCCAATACTTCCCCTAGTGTGTTGTACCACCCAAAAAGAAGAGGAAAATTGAACACCAAATCGCATGCAAGAAAGGAGCAACTGCTGTTGGAACTGTGGAGAGAATACTTAATGCTGGTTATAACACAGAGGACGCAACTGCGCC…
5306	12388	12	12	0	0	NC_001139	857273	857825	NC_001147	691169	691445	|gene note= GO_component: cytosol [goid 0005829] [evidence NAS] |neigh_up CDS[fcd=-1243](-,855269,856306) gene= RNR4 note= Rnr4p; |neigh_down CDS[fcd=743](+,858292,858609) gene= TIM13 note= Tim13p;	|gene gene= SPR1 note= synonym: SSG1 |CDS[fcd=-611](+,690696,692033) gene= SPR1 note= Spr1p;	CGGTTCCCTTTCTTGCCTGAAATGCTCGTTCTAATGGAAAAAAAAAGAAATAAAGGTGGGCCTGCCCATTAGCAGGAAATTGGTACTTAATTATTGAAAAAAAAATTATTGGTTGCTAAGAGATTCGAACTCTTGCATCTTACGATACCTGAGTATTCCCACAGTTAACTGCGGTCAAGATATTTCTTGAATCAGGCGCCTTAGACCGCTCGGCCAAACAACCACTTATTTGTTGAAAGCGAGCGCGGTACAAGTAATGTTACCTCATCTGATATACAATAAAGGTGGAGCGCCAATATATACGCATTTGACTGTTCATAATTCATTGAATATAATTTATTCCTTGTTAGTACAAAAGGGTTAAACAGAAAAAGACGTGACGTTGTAACCGAGAGGATG…	CGGGCTATCGATTGGGCTAGGAAATATGGTTTGAAAGTATGGATTGATCTTCATGGAGCCGCTGGTTCACAAAACGGATTTGATAACTCAGGGTTGAGGGATTCATATAAGTTTCTGGAAGATGAAAATTTAAGCGCCACCATGAAAGCTTTAACGTATATTTTAAGCAAATACTCAACAGACGTATACCTGGACACCGTTATTGGAATCGAATTGCTCAATGAACCGTTAGGTCCAGTTATTGACATGGAAAGATTGAAAAATTTGCTTTTGAAG
5306	2447	2	2	0	0	NC_001139	857273	857825	NC_001136	700747	701475	|gene note= GO_component: cytosol [goid 0005829] [evidence NAS] |neigh_up CDS[fcd=-1243](-,855269,856306) gene= RNR4 note= Rnr4p; |neigh_down CDS[fcd=743](+,858292,858609) gene= TIM13 note= Tim13p;	|gene |CDS(+,700312,701286) note= Ydr124wp; |gene gene= ECM18 |CDS(-,701394,702755) gene= ECM18 note= Ecm18p;	CGGTTCCCTTTCTTGCCTGAAATGCTCGTTCTAATGGAAAAAAAAAGAAATAAAGGTGGGCCTGCCCATTAGCAGGAAATTGGTACTTAATTATTGAAAAAAAAATTATTGGTTGCTAAGAGATTCGAACTCTTGCATCTTACGATACCTGAGTATTCCCACAGTTAACTGCGGTCAAGATATTTCTTGAATCAGGCGCCTTAGACCGCTCGGCCAAACAACCACTTATTTGTTGAAAGCGAGCGCGGTACAAGTAATGTTACCTCATCTGATATACAATAAAGGTGGAGCGCCAATATATACGCATTTGACTGTTCATAATTCATTGAATATAATTTATTCCTTGTTAGTACAAAAGGGTTAAACAGAAAAAGACGTGACGTTGTAACCGAGAGGATG…	CGGACCACCTCCAGAAAGCGGATCGACTGAAATTGATGTGCACGATAATTATGAATGTTCTACCGCAATCTCCCTTCAGCCTTGAGATTTTGGACGAGCTTACAGGAGTGACCGCCGCAATGACCATTTTTAAGAAAGAAACTGTGAAGAAAGTAATCATGAAAAATGTTTTCGAAATTGCGAAATGCTTGTGCAACAAAGATTTCAAGCAGAAGACCATATCACTTGATGATTTAAATGACCTAGCCCAAAAACAGAAAAAATCATACCATAGTCGTCGATTTGATGTAAATAAAATGGTTAAGGTAGAAAAAGATTTGTTACAACAGTCAAGTGGAAGCGATTCTTCACCCTCGATGATCCTTCCTTCAAAAGAAAGTGACACAGAGTATTTCCCCA…
5306	4138	1	1	40	40	NC_001139	857273	857825	NC_001138	95359	95611	|gene note= GO_component: cytosol [goid 0005829] [evidence NAS] |neigh_up CDS[fcd=-1243](-,855269,856306) gene= RNR4 note= Rnr4p; |neigh_down CDS[fcd=743](+,858292,858609) gene= TIM13 note= Tim13p;	|neigh_up CDS[fcd=-477](-,93497,95008) gene= FRS2 note= Frs2p; |neigh_down CDS[fcd=479](+,95964,97496) gene= GAT1 note= Gat1p;	CGGTTCCCTTTCTTGCCTGAAATGCTCGTTCTAATGGAAAAAAAAAGAAATAAAGGTGGGCCTGCCCATTAGCAGGAAATTGGTACTTAATTATTGAAAAAAAAATTATTGGTTGCTAAGAGATTCGAACTCTTGCATCTTACGATACCTGAGTATTCCCACAGTTAACTGCGGTCAAGATATTTCTTGAATCAGGCGCCTTAGACCGCTCGGCCAAACAACCACTTATTTGTTGAAAGCGAGCGCGGTACAAGTAATGTTACCTCATCTGATATACAATAAAGGTGGAGCGCCAATATATACGCATTTGACTGTTCATAATTCATTGAATATAATTTATTCCTTGTTAGTACAAAAGGGTTAAACAGAAAAAGACGTGACGTTGTAACCGAGAGGATG…	CGGTCCCGCTTTCCGATTTTAGCCGCCGAAGACGTACTTGGCGCCATAATTAAAACCTAGCTTGCCCAATACTTCTGAGTTCTACGTGGTGCAAAAATATTTTTTTTTTTTTGAAAAACCTACCCTATTTCATTATAGATGCATCCATCAGTATTACGGTGTCCTCACACAACCCTGTCTCTGCACAACGTAATACCTCCTTTTCCCGTCTGCTAGCTCTCATTTCGCGGTAATCCAACTTCAACCAGCAAC
5306	3533	3	3	0	0	NC_001139	857273	857825	NC_001137	154040	154464	|gene note= GO_component: cytosol [goid 0005829] [evidence NAS] |neigh_up CDS[fcd=-1243](-,855269,856306) gene= RNR4 note= Rnr4p; |neigh_down CDS[fcd=743](+,858292,858609) gene= TIM13 note= Tim13p;	|gene gene= MNN1 |CDS[fcd=-733](+,153519,155807) gene= MNN1 note= Mnn1p;	CGGTTCCCTTTCTTGCCTGAAATGCTCGTTCTAATGGAAAAAAAAAGAAATAAAGGTGGGCCTGCCCATTAGCAGGAAATTGGTACTTAATTATTGAAAAAAAAATTATTGGTTGCTAAGAGATTCGAACTCTTGCATCTTACGATACCTGAGTATTCCCACAGTTAACTGCGGTCAAGATATTTCTTGAATCAGGCGCCTTAGACCGCTCGGCCAAACAACCACTTATTTGTTGAAAGCGAGCGCGGTACAAGTAATGTTACCTCATCTGATATACAATAAAGGTGGAGCGCCAATATATACGCATTTGACTGTTCATAATTCATTGAATATAATTTATTCCTTGTTAGTACAAAAGGGTTAAACAGAAAAAGACGTGACGTTGTAACCGAGAGGATG…	CGGAAATATGATATGTTCCAGGCATTTGAGAGAATAAGAGCCTATGATAGATGTTTTATGCAGGCCAATCCAGTTAATATTCAAGAAATTTTTCCGAAAAGTGATAAGATGTCGAAAGAGAGGGTTCAATCAAAATTAATCAAAACCTTAAATGCTACTTTCCCTAATTATGATCCAGACAATTTTAAGAAATACGATCAATTCGAATTCGAGCACAAAATGTTTCCGTTTATAAATAACTTTACCACAGAGACTTTTCATGAGATGGTTCCAAAAATCACATCACCTTTTGGAAAAGTATTAGAGCAAGGCTTCTTACCCAAGTTCGATCATAAAACTGGTAAAGTGCAGGAGTATTTCAAATATGAATACGATCCATCAAAAACCTTCTGGGCCAAT…
5306	13149	8	8	8	8	NC_001139	857273	857825	NC_001148	298925	299200	|gene note= GO_component: cytosol [goid 0005829] [evidence NAS] |neigh_up CDS[fcd=-1243](-,855269,856306) gene= RNR4 note= Rnr4p; |neigh_down CDS[fcd=743](+,858292,858609) gene= TIM13 note= Tim13p;	|gene gene= ODC1 |CDS[fcd=440](-,298570,299502) gene= ODC1 note= Odc1p;	CGGTTCCCTTTCTTGCCTGAAATGCTCGTTCTAATGGAAAAAAAAAGAAATAAAGGTGGGCCTGCCCATTAGCAGGAAATTGGTACTTAATTATTGAAAAAAAAATTATTGGTTGCTAAGAGATTCGAACTCTTGCATCTTACGATACCTGAGTATTCCCACAGTTAACTGCGGTCAAGATATTTCTTGAATCAGGCGCCTTAGACCGCTCGGCCAAACAACCACTTATTTGTTGAAAGCGAGCGCGGTACAAGTAATGTTACCTCATCTGATATACAATAAAGGTGGAGCGCCAATATATACGCATTTGACTGTTCATAATTCATTGAATATAATTTATTCCTTGTTAGTACAAAAGGGTTAAACAGAAAAAGACGTGACGTTGTAACCGAGAGGATG…	CGGCATTCCAAAGAACGTGTCTCCAGATAGTGGCTTCCAACCCATTGAAAAGTGACAAAACACCACCTTTCACAACACTATTCTTTACAACTTCAATGGGTGTCTTGAACTGTGAATTCACATCCTGTAATCTAATCTTCACTAGTTCAAAAGGCGCGACGACAAAGGCTTCCACGGCGCCAGCGGACGCACCACTGTATATGGCGATTTTTTGAGTCATCTCCCCATTGGGCGTGGGGAAAATCTTTTTATAAAACGTTTGGAATGTATCGTTT
5306	13150	83	83	35	35	NC_001139	857273	857825	NC_001148	299201	299437	|gene note= GO_component: cytosol [goid 0005829] [evidence NAS] |neigh_up CDS[fcd=-1243](-,855269,856306) gene= RNR4 note= Rnr4p; |neigh_down CDS[fcd=743](+,858292,858609) gene= TIM13 note= Tim13p;	|gene gene= ODC1 |CDS[fcd=183](-,298570,299502) gene= ODC1 note= Odc1p;	CGGTTCCCTTTCTTGCCTGAAATGCTCGTTCTAATGGAAAAAAAAAGAAATAAAGGTGGGCCTGCCCATTAGCAGGAAATTGGTACTTAATTATTGAAAAAAAAATTATTGGTTGCTAAGAGATTCGAACTCTTGCATCTTACGATACCTGAGTATTCCCACAGTTAACTGCGGTCAAGATATTTCTTGAATCAGGCGCCTTAGACCGCTCGGCCAAACAACCACTTATTTGTTGAAAGCGAGCGCGGTACAAGTAATGTTACCTCATCTGATATACAATAAAGGTGGAGCGCCAATATATACGCATTTGACTGTTCATAATTCATTGAATATAATTTATTCCTTGTTAGTACAAAAGGGTTAAACAGAAAAAGACGTGACGTTGTAACCGAGAGGATG…	CGGAGAACTTAATTGCTCTTTTCGGAGCCTCCATTAATATAGGCGATGTGATACCCTTGTAAAGATGCGAAAATCCTTCCTTCTTCACAATTTTTGTAAGACAATCCATCACGCCCGTGTAGTGATCTACTGCTGCTTTCGCTGCAACAACAGCGGGATGACCTTTGGTTGTCACTTGTAATTGCATTCTTGTCTTCACCACGTCCAATGGATACATCACCAATAGCTCCGAGACG
5306	12876	1	1	0	0	NC_001139	857273	857825	NC_001148	47038	47151	|gene note= GO_component: cytosol [goid 0005829] [evidence NAS] |neigh_up CDS[fcd=-1243](-,855269,856306) gene= RNR4 note= Rnr4p; |neigh_down CDS[fcd=743](+,858292,858609) gene= TIM13 note= Tim13p;	|neigh_up CDS[fcd=-588](-,44551,46506) gene= KEL3 note= Kel3p; |neigh_down CDS[fcd=242](+,47336,48802) gene= FUM1 note= Fum1p;	CGGTTCCCTTTCTTGCCTGAAATGCTCGTTCTAATGGAAAAAAAAAGAAATAAAGGTGGGCCTGCCCATTAGCAGGAAATTGGTACTTAATTATTGAAAAAAAAATTATTGGTTGCTAAGAGATTCGAACTCTTGCATCTTACGATACCTGAGTATTCCCACAGTTAACTGCGGTCAAGATATTTCTTGAATCAGGCGCCTTAGACCGCTCGGCCAAACAACCACTTATTTGTTGAAAGCGAGCGCGGTACAAGTAATGTTACCTCATCTGATATACAATAAAGGTGGAGCGCCAATATATACGCATTTGACTGTTCATAATTCATTGAATATAATTTATTCCTTGTTAGTACAAAAGGGTTAAACAGAAAAAGACGTGACGTTGTAACCGAGAGGATG…	CGGAATGGGCGTTCGATGATTGGCTCTTTCCTGTAAAGCCTTTTTGCGTTTCTTATAGGCTATATATAATCTTCATCACTGTTGTAGACGTTAAACAAGCATCCAACAGGAGG
5306	10985	1	1	0	4	NC_001139	857273	857825	NC_001146	276379	276546	|gene note= GO_component: cytosol [goid 0005829] [evidence NAS] |neigh_up CDS[fcd=-1243](-,855269,856306) gene= RNR4 note= Rnr4p; |neigh_down CDS[fcd=743](+,858292,858609) gene= TIM13 note= Tim13p;	|gene gene= CHS1 note= synonym: USA4 |CDS[fcd=41](+,276503,279898) gene= CHS1 note= Chs1p;	CGGTTCCCTTTCTTGCCTGAAATGCTCGTTCTAATGGAAAAAAAAAGAAATAAAGGTGGGCCTGCCCATTAGCAGGAAATTGGTACTTAATTATTGAAAAAAAAATTATTGGTTGCTAAGAGATTCGAACTCTTGCATCTTACGATACCTGAGTATTCCCACAGTTAACTGCGGTCAAGATATTTCTTGAATCAGGCGCCTTAGACCGCTCGGCCAAACAACCACTTATTTGTTGAAAGCGAGCGCGGTACAAGTAATGTTACCTCATCTGATATACAATAAAGGTGGAGCGCCAATATATACGCATTTGACTGTTCATAATTCATTGAATATAATTTATTCCTTGTTAGTACAAAAGGGTTAAACAGAAAAAGACGTGACGTTGTAACCGAGAGGATG…	CGGACCTTGCAGTACTGCTTGTTTAAATACGCAGTATACATTTCTTCTTCTTCTTCTCTCTTCTTTCCTTCCTCGAAGAGTCACTAAATTAATACTGGGAAGCCAAACCAAAAAAACTATACAATGAGTGATCAAAATAATCGATCGAGAAATGAATATCACTCAAA
5306	2458	7	7	0	0	NC_001139	857273	857825	NC_001136	712471	712971	|gene note= GO_component: cytosol [goid 0005829] [evidence NAS] |neigh_up CDS[fcd=-1243](-,855269,856306) gene= RNR4 note= Rnr4p; |neigh_down CDS[fcd=743](+,858292,858609) gene= TIM13 note= Tim13p;	|gene |CDS[fcd=-3175](+,709546,712992) note= Ydr128wp;	CGGTTCCCTTTCTTGCCTGAAATGCTCGTTCTAATGGAAAAAAAAAGAAATAAAGGTGGGCCTGCCCATTAGCAGGAAATTGGTACTTAATTATTGAAAAAAAAATTATTGGTTGCTAAGAGATTCGAACTCTTGCATCTTACGATACCTGAGTATTCCCACAGTTAACTGCGGTCAAGATATTTCTTGAATCAGGCGCCTTAGACCGCTCGGCCAAACAACCACTTATTTGTTGAAAGCGAGCGCGGTACAAGTAATGTTACCTCATCTGATATACAATAAAGGTGGAGCGCCAATATATACGCATTTGACTGTTCATAATTCATTGAATATAATTTATTCCTTGTTAGTACAAAAGGGTTAAACAGAAAAAGACGTGACGTTGTAACCGAGAGGATG…	CGGCCCAAAAGCAGGGCAGCCGTGCCATTTCATCCAGCCCTTTTCATAGTAGAATGCCTGACATCAAAGTCGAGCTTTTACATGACGATATTATAGAAGCTTATGAACAAGAAGACCTCTTACATTTAGAGGTATCAGACATACCAAAGTTCCAAACTTATATTTATCAATATTCAAAGTTACTTTTTAGATGGGGACTGCCTTTAGAAAGGGTCAAAATTCTAAAAGTTAGTACTGATTTCAGAAGTTCTTATAGTTCCCAAGGCATCCCCCCTAACAATAACAAGAAAAGTCCTTACAATGGTGTACTTACGCACTGGATCGAGAACAACGAGTTTGGAGAAGAAAAATTCCTAGCCCGAAATTGTAATTACTGTGATTTAAGAGTGACAAGAAGTA…
5306	10028	3	4	63	75	NC_001139	857273	857825	NC_001145	369736	369884	|gene note= GO_component: cytosol [goid 0005829] [evidence NAS] |neigh_up CDS[fcd=-1243](-,855269,856306) gene= RNR4 note= Rnr4p; |neigh_down CDS[fcd=743](+,858292,858609) gene= TIM13 note= Tim13p;	|gene gene= ERB1 |CDS[fcd=706](-,368093,370516) gene= ERB1 note= Erb1p;	CGGTTCCCTTTCTTGCCTGAAATGCTCGTTCTAATGGAAAAAAAAAGAAATAAAGGTGGGCCTGCCCATTAGCAGGAAATTGGTACTTAATTATTGAAAAAAAAATTATTGGTTGCTAAGAGATTCGAACTCTTGCATCTTACGATACCTGAGTATTCCCACAGTTAACTGCGGTCAAGATATTTCTTGAATCAGGCGCCTTAGACCGCTCGGCCAAACAACCACTTATTTGTTGAAAGCGAGCGCGGTACAAGTAATGTTACCTCATCTGATATACAATAAAGGTGGAGCGCCAATATATACGCATTTGACTGTTCATAATTCATTGAATATAATTTATTCCTTGTTAGTACAAAAGGGTTAAACAGAAAAAGACGTGACGTTGTAACCGAGAGGATG…	CGGAACAGCAGTTAATGGCATCACTTCTTCGTGTCTCGTGAACCAATCGATTAACGGTTCGTATGGATTTATGCTATCATCAGTTTGTTCGTTCCTTTGGATTTTGGAAATAAGTTCTAATTCCTCTTTGGTTAAGTTCAAACTTGAA
5306	4084	1	1	0	0	NC_001139	857273	857825	NC_001138	53843	53920	|gene note= GO_component: cytosol [goid 0005829] [evidence NAS] |neigh_up CDS[fcd=-1243](-,855269,856306) gene= RNR4 note= Rnr4p; |neigh_down CDS[fcd=743](+,858292,858609) gene= TIM13 note= Tim13p;	|gene gene= ACT1 note= synonyms: ABY1, END7 gene= ACT1 note= Act1p; |neigh_up CDS[fcd=-2531](+,51350,52972) note= Yfl040wp; |neigh_down CDS[fcd=2104](-,55365,55985) gene= YPT1 note= Ypt1p;	CGGTTCCCTTTCTTGCCTGAAATGCTCGTTCTAATGGAAAAAAAAAGAAATAAAGGTGGGCCTGCCCATTAGCAGGAAATTGGTACTTAATTATTGAAAAAAAAATTATTGGTTGCTAAGAGATTCGAACTCTTGCATCTTACGATACCTGAGTATTCCCACAGTTAACTGCGGTCAAGATATTTCTTGAATCAGGCGCCTTAGACCGCTCGGCCAAACAACCACTTATTTGTTGAAAGCGAGCGCGGTACAAGTAATGTTACCTCATCTGATATACAATAAAGGTGGAGCGCCAATATATACGCATTTGACTGTTCATAATTCATTGAATATAATTTATTCCTTGTTAGTACAAAAGGGTTAAACAGAAAAAGACGTGACGTTGTAACCGAGAGGATG…	CGGCCAAATCGATTCTCAAAATGGCGTGAGGTAGAGAGAAACCAGCGTAAATTGGAACGACGTGAGTAACACCATCA
5306	10026	32	32	0	0	NC_001139	857273	857825	NC_001145	368127	368201	|gene note= GO_component: cytosol [goid 0005829] [evidence NAS] |neigh_up CDS[fcd=-1243](-,855269,856306) gene= RNR4 note= Rnr4p; |neigh_down CDS[fcd=743](+,858292,858609) gene= TIM13 note= Tim13p;	|gene gene= ERB1 |CDS[fcd=2352](-,368093,370516) gene= ERB1 note= Erb1p;	CGGTTCCCTTTCTTGCCTGAAATGCTCGTTCTAATGGAAAAAAAAAGAAATAAAGGTGGGCCTGCCCATTAGCAGGAAATTGGTACTTAATTATTGAAAAAAAAATTATTGGTTGCTAAGAGATTCGAACTCTTGCATCTTACGATACCTGAGTATTCCCACAGTTAACTGCGGTCAAGATATTTCTTGAATCAGGCGCCTTAGACCGCTCGGCCAAACAACCACTTATTTGTTGAAAGCGAGCGCGGTACAAGTAATGTTACCTCATCTGATATACAATAAAGGTGGAGCGCCAATATATACGCATTTGACTGTTCATAATTCATTGAATATAATTTATTCCTTGTTAGTACAAAAGGGTTAAACAGAAAAAGACGTGACGTTGTAACCGAGAGGATG…	CGGCAGAAAACAGCCAAGCTTCCCTCGGATGCCAAATAGCATCAAGAACACCCAGACTATTGATTACTTTATGA
5306	6316	30	30	0	0	NC_001139	857273	857825	NC_001141	68070	68303	|gene note= GO_component: cytosol [goid 0005829] [evidence NAS] |neigh_up CDS[fcd=-1243](-,855269,856306) gene= RNR4 note= Rnr4p; |neigh_down CDS[fcd=743](+,858292,858609) gene= TIM13 note= Tim13p;	|neigh_up CDS[fcd=-119](-,63028,68067) gene= MLP2 note= Mlp2p; |neigh_down CDS[fcd=5267](-,69791,73453) gene= SLN1 note= Sln1p;	CGGTTCCCTTTCTTGCCTGAAATGCTCGTTCTAATGGAAAAAAAAAGAAATAAAGGTGGGCCTGCCCATTAGCAGGAAATTGGTACTTAATTATTGAAAAAAAAATTATTGGTTGCTAAGAGATTCGAACTCTTGCATCTTACGATACCTGAGTATTCCCACAGTTAACTGCGGTCAAGATATTTCTTGAATCAGGCGCCTTAGACCGCTCGGCCAAACAACCACTTATTTGTTGAAAGCGAGCGCGGTACAAGTAATGTTACCTCATCTGATATACAATAAAGGTGGAGCGCCAATATATACGCATTTGACTGTTCATAATTCATTGAATATAATTTATTCCTTGTTAGTACAAAAGGGTTAAACAGAAAAAGACGTGACGTTGTAACCGAGAGGATG…	CGGTTTGCTTCCGCCCAGTGTTCTTTCGCCTTAAATTTCTTTTGGTAAACTTCCACTAGAAAAAGAAAAGCCACCAGAGAAATAAGCGCTTGCAATTTAACGCCGATATTGTTTTCTTCTTCTATTATCTTCAATTATCGATCAACTCTATCCAACAATTCTATAATATCCACTGTTCATTAACGAATATTGGTCTTTTTCCCTTATGGTGAAGTAAATTTTCCATGCAATAT
5306	2727	5	5	14	14	NC_001139	857273	857825	NC_001136	971217	973206	|gene note= GO_component: cytosol [goid 0005829] [evidence NAS] |neigh_up CDS[fcd=-1243](-,855269,856306) gene= RNR4 note= Rnr4p; |neigh_down CDS[fcd=743](+,858292,858609) gene= TIM13 note= Tim13p;	|gene gene= SET7 note= synonym: RMS1 |CDS(-,969986,971470) gene= SET7 note= Set7p; |gene gene= HSP78 |CDS(-,971804,974239) gene= HSP78 note= Hsp78p;	CGGTTCCCTTTCTTGCCTGAAATGCTCGTTCTAATGGAAAAAAAAAGAAATAAAGGTGGGCCTGCCCATTAGCAGGAAATTGGTACTTAATTATTGAAAAAAAAATTATTGGTTGCTAAGAGATTCGAACTCTTGCATCTTACGATACCTGAGTATTCCCACAGTTAACTGCGGTCAAGATATTTCTTGAATCAGGCGCCTTAGACCGCTCGGCCAAACAACCACTTATTTGTTGAAAGCGAGCGCGGTACAAGTAATGTTACCTCATCTGATATACAATAAAGGTGGAGCGCCAATATATACGCATTTGACTGTTCATAATTCATTGAATATAATTTATTCCTTGTTAGTACAAAAGGGTTAAACAGAAAAAGACGTGACGTTGTAACCGAGAGGATG…	CGGTTTCGTTCAGGAACTTATCCTTGAGAGAAGGATAATCCTTTATCAGTTGAGATGTTGTAACGCTTAAAACAGAACTACGAGGTATTTTAAACAATGTTTCATCCTTCTTAATCTTTTGAGTGGCAACTACTGCGCGGCCTTGATTATCACAACAAAGATCTTTGATTTCTATCTTAGGGGATACTTCAATTTCAGCGGTAGTTTTTAACCAGCAAACAAAGTTTTCGGTATCTCTTGAAAAATCATCCATTTTCGCAAACTTTCCCCTTTATTACTAGTCATATTGAAATGATCGTATTAAGCTTTTACAAAGGTAATGAAATTTTTTCATACTCGAGAGAAAAATATGTGACACATGTGTGTATTACCCGCAGTAACTCTCGAAGATTACATTTG…
5306	11675	15	15	0	0	NC_001139	857273	857825	NC_001147	83234	83350	|gene note= GO_component: cytosol [goid 0005829] [evidence NAS] |neigh_up CDS[fcd=-1243](-,855269,856306) gene= RNR4 note= Rnr4p; |neigh_down CDS[fcd=743](+,858292,858609) gene= TIM13 note= Tim13p;	|neigh_up CDS[fcd=-372](-,81787,82920) gene= MDH2 note= Mdh2p; |neigh_down CDS[fcd=542](+,83834,85264) gene= TRM13 note= Trm13p;	CGGTTCCCTTTCTTGCCTGAAATGCTCGTTCTAATGGAAAAAAAAAGAAATAAAGGTGGGCCTGCCCATTAGCAGGAAATTGGTACTTAATTATTGAAAAAAAAATTATTGGTTGCTAAGAGATTCGAACTCTTGCATCTTACGATACCTGAGTATTCCCACAGTTAACTGCGGTCAAGATATTTCTTGAATCAGGCGCCTTAGACCGCTCGGCCAAACAACCACTTATTTGTTGAAAGCGAGCGCGGTACAAGTAATGTTACCTCATCTGATATACAATAAAGGTGGAGCGCCAATATATACGCATTTGACTGTTCATAATTCATTGAATATAATTTATTCCTTGTTAGTACAAAAGGGTTAAACAGAAAAAGACGTGACGTTGTAACCGAGAGGATG…	CGGATCATTAGGGGAGTATTGGGGGCAAGGCACGGCGGCTTTAGAACGGCTACGGCCGAATGGGCAAAGTAATTGCGGATTAAAGGGGCCGTATCGTAGATGATGAGTCCATTTGG
5306	10981	1	1	0	0	NC_001139	857273	857825	NC_001146	272104	272761	|gene note= GO_component: cytosol [goid 0005829] [evidence NAS] |neigh_up CDS[fcd=-1243](-,855269,856306) gene= RNR4 note= Rnr4p; |neigh_down CDS[fcd=743](+,858292,858609) gene= TIM13 note= Tim13p;	|gene |CDS(-,271524,272309) note= Ynl195cp; |gene |CDS(-,272711,273616) note= Ynl194cp;	CGGTTCCCTTTCTTGCCTGAAATGCTCGTTCTAATGGAAAAAAAAAGAAATAAAGGTGGGCCTGCCCATTAGCAGGAAATTGGTACTTAATTATTGAAAAAAAAATTATTGGTTGCTAAGAGATTCGAACTCTTGCATCTTACGATACCTGAGTATTCCCACAGTTAACTGCGGTCAAGATATTTCTTGAATCAGGCGCCTTAGACCGCTCGGCCAAACAACCACTTATTTGTTGAAAGCGAGCGCGGTACAAGTAATGTTACCTCATCTGATATACAATAAAGGTGGAGCGCCAATATATACGCATTTGACTGTTCATAATTCATTGAATATAATTTATTCCTTGTTAGTACAAAAGGGTTAAACAGAAAAAGACGTGACGTTGTAACCGAGAGGATG…	CGGTGTTTAAAGTAGGGCCTGGGCATTCAGTTGGTAAAATTCCAGAGCGCTGTTCGTGAGACGAAGAGTGTCCGTCACGATGAGGATATTTGAGGTCGCTTGCCCTGCCACACCCTGGAACGCTGTACGTTTTATCCTTTGCCTGGTTCATATTGAGAGCATCATCACTTGCATATGCTTGAGCAGATTGGCCCAAACCCAGCATCCTGTCATAAGATTTGTCAATATGGTAGCCGAAGCCGTGCTGTGTAGCAGAAGACTCTTGGTTTGTGTCTAATTCATTGCTGTCGAAATAGTGAAAAGAAAAGAAAAAGAGTTAGTAAGATGTGTATGATACATTAAAAGGAAGTTAAAATACGATTTCTTTTTATTAGATGGTATCATTACATTGTTTGACGT…
5306	12892	1	1	0	0	NC_001139	857273	857825	NC_001148	64061	64310	|gene note= GO_component: cytosol [goid 0005829] [evidence NAS] |neigh_up CDS[fcd=-1243](-,855269,856306) gene= RNR4 note= Rnr4p; |neigh_down CDS[fcd=743](+,858292,858609) gene= TIM13 note= Tim13p;	|neigh_up CDS[fcd=-906](+,63279,63860) note= Ypl257wp; |neigh_down CDS[fcd=2429](-,64977,66614) gene= CLN2 note= Cln2p;	CGGTTCCCTTTCTTGCCTGAAATGCTCGTTCTAATGGAAAAAAAAAGAAATAAAGGTGGGCCTGCCCATTAGCAGGAAATTGGTACTTAATTATTGAAAAAAAAATTATTGGTTGCTAAGAGATTCGAACTCTTGCATCTTACGATACCTGAGTATTCCCACAGTTAACTGCGGTCAAGATATTTCTTGAATCAGGCGCCTTAGACCGCTCGGCCAAACAACCACTTATTTGTTGAAAGCGAGCGCGGTACAAGTAATGTTACCTCATCTGATATACAATAAAGGTGGAGCGCCAATATATACGCATTTGACTGTTCATAATTCATTGAATATAATTTATTCCTTGTTAGTACAAAAGGGTTAAACAGAAAAAGACGTGACGTTGTAACCGAGAGGATG…	CGGTTGAGTGTATCGGTCATAGTACAAAGGCAGAAATGAATAATAGTAATATTAATCGCAGTTTCCTGTTGTTTAGAGAACTGAAACGCTTTGTGGGCATCAGGTTTAGATTAACTGCTACCCTTCTTCTGTATTTGTCTGGCCATGCTTCTCAAATAAACCGCTGCGGATAACATTTCAAGTGGTTTCTCAAGGGAGAATCATAGTTTAGCTTAACATACAGCAAATCGTCACTATCTTGACTGATGC
5306	4918	2	2	0	0	NC_001139	857273	857825	NC_001139	487128	487307	|gene note= GO_component: cytosol [goid 0005829] [evidence NAS] |neigh_up CDS[fcd=-1243](-,855269,856306) gene= RNR4 note= Rnr4p; |neigh_down CDS[fcd=743](+,858292,858609) gene= TIM13 note= Tim13p;	|gene gene= PMC1 |CDS[fcd=-1292](+,485925,489446) gene= PMC1 note= Pmc1p;	CGGTTCCCTTTCTTGCCTGAAATGCTCGTTCTAATGGAAAAAAAAAGAAATAAAGGTGGGCCTGCCCATTAGCAGGAAATTGGTACTTAATTATTGAAAAAAAAATTATTGGTTGCTAAGAGATTCGAACTCTTGCATCTTACGATACCTGAGTATTCCCACAGTTAACTGCGGTCAAGATATTTCTTGAATCAGGCGCCTTAGACCGCTCGGCCAAACAACCACTTATTTGTTGAAAGCGAGCGCGGTACAAGTAATGTTACCTCATCTGATATACAATAAAGGTGGAGCGCCAATATATACGCATTTGACTGTTCATAATTCATTGAATATAATTTATTCCTTGTTAGTACAAAAGGGTTAAACAGAAAAAGACGTGACGTTGTAACCGAGAGGATG…	CGGAAGGTTTACCATTAGCTGTAACTTTGGCCTTAGCGTTTGCAACAACAAGAATGACAAAAGACGGTAATTTAGTACGGGTTTTAAGAAGCTGTGAAACGATGGGATCTGCTACTGCAGTGTGCTCTGATAAGACTGGCACTTTGACAGAAAATGTCATGACTGTCGTTCGTGGCTTC
5306	1406	3	3	0	0	NC_001139	857273	857825	NC_001135	122890	123582	|gene note= GO_component: cytosol [goid 0005829] [evidence NAS] |neigh_up CDS[fcd=-1243](-,855269,856306) gene= RNR4 note= Rnr4p; |neigh_down CDS[fcd=743](+,858292,858609) gene= TIM13 note= Tim13p;	|gene gene= SUF2 |tRNA gene= SUF2 note= GO_component: cytosol [goid 0005829] [evidence NAS] |neigh_up CDS[fcd=-910](-,120944,122326) gene= CIT2 note= Cit2p; |neigh_down CDS[fcd=3492](-,126009,126728) note= Ycr007cp;	CGGTTCCCTTTCTTGCCTGAAATGCTCGTTCTAATGGAAAAAAAAAGAAATAAAGGTGGGCCTGCCCATTAGCAGGAAATTGGTACTTAATTATTGAAAAAAAAATTATTGGTTGCTAAGAGATTCGAACTCTTGCATCTTACGATACCTGAGTATTCCCACAGTTAACTGCGGTCAAGATATTTCTTGAATCAGGCGCCTTAGACCGCTCGGCCAAACAACCACTTATTTGTTGAAAGCGAGCGCGGTACAAGTAATGTTACCTCATCTGATATACAATAAAGGTGGAGCGCCAATATATACGCATTTGACTGTTCATAATTCATTGAATATAATTTATTCCTTGTTAGTACAAAAGGGTTAAACAGAAAAAGACGTGACGTTGTAACCGAGAGGATG…	CGGTATAGCATATCTAAACCACAGAAGGACGCTTATACGGCCGTCTTCCACAGTAATTAGAAGGACATTAGTCGGAGTGTAAATAAGACGGTTGCATACGCGTATGAACATGGGCCATTCATTTTACGGAAATGGCAACACATTTTCTTGTTTTTAATGTAAATAGTACGGAGTTCCTTTTTGGTGCGCTGAATGTATGCCGTAGTTTGGTTTCTTGCCAGGCGTGAGAAGAGAGGTCACACATGCTGTTGGGGTTCATGATTTTCAGCCTTCGCTCTGCTAAGTAAAAGGTCCATTGATCCGAAGCGCTTCCTCCAATATCGCAGTGATAAACGGTCATGTAAGCCTACAGTCTTTAAACTGTAGATGATTTAATGGATTATCTCATACATTGAATAT…
5306	513	226	226	0	0	NC_001139	857273	857825	NC_001134	176247	176345	|gene note= GO_component: cytosol [goid 0005829] [evidence NAS] |neigh_up CDS[fcd=-1243](-,855269,856306) gene= RNR4 note= Rnr4p; |neigh_down CDS[fcd=743](+,858292,858609) gene= TIM13 note= Tim13p;	|gene gene= MCM2 |CDS[fcd=1233](-,174923,177529) gene= MCM2 note= Mcm2p;	CGGTTCCCTTTCTTGCCTGAAATGCTCGTTCTAATGGAAAAAAAAAGAAATAAAGGTGGGCCTGCCCATTAGCAGGAAATTGGTACTTAATTATTGAAAAAAAAATTATTGGTTGCTAAGAGATTCGAACTCTTGCATCTTACGATACCTGAGTATTCCCACAGTTAACTGCGGTCAAGATATTTCTTGAATCAGGCGCCTTAGACCGCTCGGCCAAACAACCACTTATTTGTTGAAAGCGAGCGCGGTACAAGTAATGTTACCTCATCTGATATACAATAAAGGTGGAGCGCCAATATATACGCATTTGACTGTTCATAATTCATTGAATATAATTTATTCCTTGTTAGTACAAAAGGGTTAAACAGAAAAAGACGTGACGTTGTAACCGAGAGGATG…	CGGTAACTTCTACCTCTTCACCTGGCTTGGATACATCTACCAAATCCGCCAACAAAATGACTTCTCTATGTCTTGGTAGACGGCCTGGAGGAACGGTT
5306	7925	1	1	0	0	NC_001139	857273	857825	NC_001143	322097	322248	|gene note= GO_component: cytosol [goid 0005829] [evidence NAS] |neigh_up CDS[fcd=-1243](-,855269,856306) gene= RNR4 note= Rnr4p; |neigh_down CDS[fcd=743](+,858292,858609) gene= TIM13 note= Tim13p;	|neigh_up CDS[fcd=-1010](-,320659,321162) note= Ykl063cp; |neigh_down CDS[fcd=700](+,322872,324764) gene= MSN4 note= Msn4p;	CGGTTCCCTTTCTTGCCTGAAATGCTCGTTCTAATGGAAAAAAAAAGAAATAAAGGTGGGCCTGCCCATTAGCAGGAAATTGGTACTTAATTATTGAAAAAAAAATTATTGGTTGCTAAGAGATTCGAACTCTTGCATCTTACGATACCTGAGTATTCCCACAGTTAACTGCGGTCAAGATATTTCTTGAATCAGGCGCCTTAGACCGCTCGGCCAAACAACCACTTATTTGTTGAAAGCGAGCGCGGTACAAGTAATGTTACCTCATCTGATATACAATAAAGGTGGAGCGCCAATATATACGCATTTGACTGTTCATAATTCATTGAATATAATTTATTCCTTGTTAGTACAAAAGGGTTAAACAGAAAAAGACGTGACGTTGTAACCGAGAGGATG…	CGGGGCATTTTGAGCGCGGCAAAAAAAGCCCGAAGATCCGTTCCTCGAAGGAACGGCAACCGCACACCAAGAAAAAGGGAAAAAGGTGGGGTTGGCTGTAAAGTACGAGCGCGGGGACGGATCCGTAACAATTTCTATGTGGGGCCAGCAG
5306	6839	8	8	0	0	NC_001139	857273	857825	NC_001142	83738	84024	|gene note= GO_component: cytosol [goid 0005829] [evidence NAS] |neigh_up CDS[fcd=-1243](-,855269,856306) gene= RNR4 note= Rnr4p; |neigh_down CDS[fcd=743](+,858292,858609) gene= TIM13 note= Tim13p;	|gene gene= GON7 note= synonyms: PCC2, LDB6 |CDS[fcd=-435](+,83446,83817) gene= GON7 note= Gon7p;	CGGTTCCCTTTCTTGCCTGAAATGCTCGTTCTAATGGAAAAAAAAAGAAATAAAGGTGGGCCTGCCCATTAGCAGGAAATTGGTACTTAATTATTGAAAAAAAAATTATTGGTTGCTAAGAGATTCGAACTCTTGCATCTTACGATACCTGAGTATTCCCACAGTTAACTGCGGTCAAGATATTTCTTGAATCAGGCGCCTTAGACCGCTCGGCCAAACAACCACTTATTTGTTGAAAGCGAGCGCGGTACAAGTAATGTTACCTCATCTGATATACAATAAAGGTGGAGCGCCAATATATACGCATTTGACTGTTCATAATTCATTGAATATAATTTATTCCTTGTTAGTACAAAAGGGTTAAACAGAAAAAGACGTGACGTTGTAACCGAGAGGATG…	CGGCGCAGACGAGAAGCGGATCCAGGAAGAGATTAACCAGCTATTAGATGGTGGTGACGGTGACGAAGATGCTGTTTAGGCAACGATATGTAGCGCTAGAGAGTGTATATACAAACAGAAAAGAGTCTAATGATAAATGACAAATATTTCGTTACAAGTGATAATTGTTGAACTAGGAAGAGTTGATATAAAAAAATAATAAACACACGATGGGATACAGTTAAGAAGGATTGATCGACTCCTAAATGATGCGAAGAAAGCCAATTTTCAACTTGGAATCATCCTG
5306	9520	3	3	0	0	NC_001139	857273	857825	NC_001144	1008496	1008911	|gene note= GO_component: cytosol [goid 0005829] [evidence NAS] |neigh_up CDS[fcd=-1243](-,855269,856306) gene= RNR4 note= Rnr4p; |neigh_down CDS[fcd=743](+,858292,858609) gene= TIM13 note= Tim13p;	|gene gene= ECM30 |CDS[fcd=2539](-,1007418,1011242) gene= ECM30 note= Ecm30p;	CGGTTCCCTTTCTTGCCTGAAATGCTCGTTCTAATGGAAAAAAAAAGAAATAAAGGTGGGCCTGCCCATTAGCAGGAAATTGGTACTTAATTATTGAAAAAAAAATTATTGGTTGCTAAGAGATTCGAACTCTTGCATCTTACGATACCTGAGTATTCCCACAGTTAACTGCGGTCAAGATATTTCTTGAATCAGGCGCCTTAGACCGCTCGGCCAAACAACCACTTATTTGTTGAAAGCGAGCGCGGTACAAGTAATGTTACCTCATCTGATATACAATAAAGGTGGAGCGCCAATATATACGCATTTGACTGTTCATAATTCATTGAATATAATTTATTCCTTGTTAGTACAAAAGGGTTAAACAGAAAAAGACGTGACGTTGTAACCGAGAGGATG…	CGGACCAAACTTCATTAAAATTTTCATATTTGGGATTTTTACATTTGTGAGTAAACGTTAGTGGTGTAGGCCATTGAGGTCTATGTGGCCAATACTCTAATTGATGTTGCAAATTCAGATTTGAATCTGACTTGAAATCAATGAATGCAATGACTTGGTAGTTCTTATCATGATTCGTACTTGAAAAATGCTTAACTGTCCCAGGTGTTTCATTTTCTAATGACGCAGGATTGAAAAGCAAATAAGGAGTTGGAGATTCGTTTTCTTGACCTGGGTCCTCATTTTGATTTTGGCCTCGATTGTCATTTTGGCCTTGTTGCTGATTTTGATGTTGTTGATTTGCTGAAGAATAAAGATTGACTTGAGGCAAATCAGTTATCTCTTCAAATTGATAGAAAT…
5306	11933	3	3	0	0	NC_001139	857273	857825	NC_001147	304420	304524	|gene note= GO_component: cytosol [goid 0005829] [evidence NAS] |neigh_up CDS[fcd=-1243](-,855269,856306) gene= RNR4 note= Rnr4p; |neigh_down CDS[fcd=743](+,858292,858609) gene= TIM13 note= Tim13p;	|neigh_up CDS[fcd=-488](-,303580,303984) gene= HTZ1 note= Htz1p; |neigh_down CDS[fcd=878](+,305350,307410) gene= PLB3 note= Plb3p;	CGGTTCCCTTTCTTGCCTGAAATGCTCGTTCTAATGGAAAAAAAAAGAAATAAAGGTGGGCCTGCCCATTAGCAGGAAATTGGTACTTAATTATTGAAAAAAAAATTATTGGTTGCTAAGAGATTCGAACTCTTGCATCTTACGATACCTGAGTATTCCCACAGTTAACTGCGGTCAAGATATTTCTTGAATCAGGCGCCTTAGACCGCTCGGCCAAACAACCACTTATTTGTTGAAAGCGAGCGCGGTACAAGTAATGTTACCTCATCTGATATACAATAAAGGTGGAGCGCCAATATATACGCATTTGACTGTTCATAATTCATTGAATATAATTTATTCCTTGTTAGTACAAAAGGGTTAAACAGAAAAAGACGTGACGTTGTAACCGAGAGGATG…	CGGGGCGGGCGGGCGGCTGGCAGACATATTGATTGCGGGTAACACCTCCGAGGTTAATTAATCAAGCAACGTGCGGAGTTTTATCACATGGATGTTTCTTATCA
5306	13588	30	30	2	2	NC_001139	857273	857825	NC_001148	678914	679012	|gene note= GO_component: cytosol [goid 0005829] [evidence NAS] |neigh_up CDS[fcd=-1243](-,855269,856306) gene= RNR4 note= Rnr4p; |neigh_down CDS[fcd=743](+,858292,858609) gene= TIM13 note= Tim13p;	|neigh_up CDS[fcd=-1801](+,677162,677638) gene= FCY1 note= Fcy1p; |neigh_down CDS[fcd=727](+,679690,680796) gene= ROX1 note= Rox1p;	CGGTTCCCTTTCTTGCCTGAAATGCTCGTTCTAATGGAAAAAAAAAGAAATAAAGGTGGGCCTGCCCATTAGCAGGAAATTGGTACTTAATTATTGAAAAAAAAATTATTGGTTGCTAAGAGATTCGAACTCTTGCATCTTACGATACCTGAGTATTCCCACAGTTAACTGCGGTCAAGATATTTCTTGAATCAGGCGCCTTAGACCGCTCGGCCAAACAACCACTTATTTGTTGAAAGCGAGCGCGGTACAAGTAATGTTACCTCATCTGATATACAATAAAGGTGGAGCGCCAATATATACGCATTTGACTGTTCATAATTCATTGAATATAATTTATTCCTTGTTAGTACAAAAGGGTTAAACAGAAAAAGACGTGACGTTGTAACCGAGAGGATG…	CGGAGGGAATAATAAAATCGGGGTGACGCAAGTATGAAGTCATGTGTGCTTAGCAATTACGTAGAGGGATTAGAAATAATAGTGTGCGGTTATCGGAA
5306	523	87	87	1	1	NC_001139	857273	857825	NC_001134	185033	185153	|gene note= GO_component: cytosol [goid 0005829] [evidence NAS] |neigh_up CDS[fcd=-1243](-,855269,856306) gene= RNR4 note= Rnr4p; |neigh_down CDS[fcd=743](+,858292,858609) gene= TIM13 note= Tim13p;	|gene gene= APN2 note= synonym: ETH1 |CDS[fcd=-737](+,184356,185918) gene= APN2 note= Apn2p;	CGGTTCCCTTTCTTGCCTGAAATGCTCGTTCTAATGGAAAAAAAAAGAAATAAAGGTGGGCCTGCCCATTAGCAGGAAATTGGTACTTAATTATTGAAAAAAAAATTATTGGTTGCTAAGAGATTCGAACTCTTGCATCTTACGATACCTGAGTATTCCCACAGTTAACTGCGGTCAAGATATTTCTTGAATCAGGCGCCTTAGACCGCTCGGCCAAACAACCACTTATTTGTTGAAAGCGAGCGCGGTACAAGTAATGTTACCTCATCTGATATACAATAAAGGTGGAGCGCCAATATATACGCATTTGACTGTTCATAATTCATTGAATATAATTTATTCCTTGTTAGTACAAAAGGGTTAAACAGAAAAAGACGTGACGTTGTAACCGAGAGGATG…	CGGGATCTTATAGACAGTGCCGATACATTAGAACAATTCTCAATTCCAATAACAGATCCCATGGGTGGAACAAAGTTAGAAGCACAATATAGGGATAAAGCAATCCAATTTATTATCAAT
5306	5212	1	1	0	0	NC_001139	857273	857825	NC_001139	771229	771800	|gene note= GO_component: cytosol [goid 0005829] [evidence NAS] |neigh_up CDS[fcd=-1243](-,855269,856306) gene= RNR4 note= Rnr4p; |neigh_down CDS[fcd=743](+,858292,858609) gene= TIM13 note= Tim13p;	|gene gene= VPS62 |CDS[fcd=-940](+,770574,771977) gene= VPS62 note= Vps62p;	CGGTTCCCTTTCTTGCCTGAAATGCTCGTTCTAATGGAAAAAAAAAGAAATAAAGGTGGGCCTGCCCATTAGCAGGAAATTGGTACTTAATTATTGAAAAAAAAATTATTGGTTGCTAAGAGATTCGAACTCTTGCATCTTACGATACCTGAGTATTCCCACAGTTAACTGCGGTCAAGATATTTCTTGAATCAGGCGCCTTAGACCGCTCGGCCAAACAACCACTTATTTGTTGAAAGCGAGCGCGGTACAAGTAATGTTACCTCATCTGATATACAATAAAGGTGGAGCGCCAATATATACGCATTTGACTGTTCATAATTCATTGAATATAATTTATTCCTTGTTAGTACAAAAGGGTTAAACAGAAAAAGACGTGACGTTGTAACCGAGAGGATG…	CGGACCATGGGGAAATCATGTAGGGGACTGGGAACATTCTTTAGTACGATTCTATAAAGGAGAACCACAATATCTATGGATGAGTGCGCATGGGGGTGGTAGTGCCTATAAGTTCGAAGCCATTGAGAAAATCAAAAGATTGCGTCGTGTTGACGGTAAATTGACAAACGAGGTTATTAAGAAGCCTTTAATATTTAGTGCAAGAGGCACACATGCACATTATGCATCAGTCGGTCAACATGCGCACGATGTTCCGTTTTTCTTTATGCCATTGAGTGACTTTACTGATAGAGGGCCATTATGGGATCCTTCTTTAAACTATTATGCCTATACAGTGACTGTGGGGGAAAAAATGACACCATGCGGCGCTGAAGAAACTAAAATGGGACTAGAATGGCT…
5306	7911	1	1	0	0	NC_001139	857273	857825	NC_001143	310360	310440	|gene note= GO_component: cytosol [goid 0005829] [evidence NAS] |neigh_up CDS[fcd=-1243](-,855269,856306) gene= RNR4 note= Rnr4p; |neigh_down CDS[fcd=743](+,858292,858609) gene= TIM13 note= Tim13p;	|gene gene= NUP100 note= synonym: NSP100 |CDS[fcd=-557](+,309843,312722) gene= NUP100 note= Nup100p;	CGGTTCCCTTTCTTGCCTGAAATGCTCGTTCTAATGGAAAAAAAAAGAAATAAAGGTGGGCCTGCCCATTAGCAGGAAATTGGTACTTAATTATTGAAAAAAAAATTATTGGTTGCTAAGAGATTCGAACTCTTGCATCTTACGATACCTGAGTATTCCCACAGTTAACTGCGGTCAAGATATTTCTTGAATCAGGCGCCTTAGACCGCTCGGCCAAACAACCACTTATTTGTTGAAAGCGAGCGCGGTACAAGTAATGTTACCTCATCTGATATACAATAAAGGTGGAGCGCCAATATATACGCATTTGACTGTTCATAATTCATTGAATATAATTTATTCCTTGTTAGTACAAAAGGGTTAAACAGAAAAAGACGTGACGTTGTAACCGAGAGGATG…	CGGAAGTAGTTTCGGAACAGGCTTAAATGGCAACGGCTCTAACATATTTGGGGCAGGGAACAACTCACAAAGCAATACTA
5306	4659	25	25	22	22	NC_001139	857273	857825	NC_001139	272839	272985	|gene note= GO_component: cytosol [goid 0005829] [evidence NAS] |neigh_up CDS[fcd=-1243](-,855269,856306) gene= RNR4 note= Rnr4p; |neigh_down CDS[fcd=743](+,858292,858609) gene= TIM13 note= Tim13p;	|gene gene= MET13 note= synonym: MET11 |CDS[fcd=-386](+,272526,274328) gene= MET13 note= Met13p;	CGGTTCCCTTTCTTGCCTGAAATGCTCGTTCTAATGGAAAAAAAAAGAAATAAAGGTGGGCCTGCCCATTAGCAGGAAATTGGTACTTAATTATTGAAAAAAAAATTATTGGTTGCTAAGAGATTCGAACTCTTGCATCTTACGATACCTGAGTATTCCCACAGTTAACTGCGGTCAAGATATTTCTTGAATCAGGCGCCTTAGACCGCTCGGCCAAACAACCACTTATTTGTTGAAAGCGAGCGCGGTACAAGTAATGTTACCTCATCTGATATACAATAAAGGTGGAGCGCCAATATATACGCATTTGACTGTTCATAATTCATTGAATATAATTTATTCCTTGTTAGTACAAAAGGGTTAAACAGAAAAAGACGTGACGTTGTAACCGAGAGGATG…	CGGTTGCCAGAACATCCTAGCGCTGAGAGGAGATCCTCCTAGGGACGCAGAAAACTGGACTCCCGTTGAAGGTGGCTTCCAGTATGCCAAGGACTTGATTAAGTATATCAAGTCCAAGTACGGTGACCATTTCGCTATCGGCGTTG
5306	9519	2	2	0	0	NC_001139	857273	857825	NC_001144	1008345	1008495	|gene note= GO_component: cytosol [goid 0005829] [evidence NAS] |neigh_up CDS[fcd=-1243](-,855269,856306) gene= RNR4 note= Rnr4p; |neigh_down CDS[fcd=743](+,858292,858609) gene= TIM13 note= Tim13p;	|gene gene= ECM30 |CDS[fcd=2822](-,1007418,1011242) gene= ECM30 note= Ecm30p;	CGGTTCCCTTTCTTGCCTGAAATGCTCGTTCTAATGGAAAAAAAAAGAAATAAAGGTGGGCCTGCCCATTAGCAGGAAATTGGTACTTAATTATTGAAAAAAAAATTATTGGTTGCTAAGAGATTCGAACTCTTGCATCTTACGATACCTGAGTATTCCCACAGTTAACTGCGGTCAAGATATTTCTTGAATCAGGCGCCTTAGACCGCTCGGCCAAACAACCACTTATTTGTTGAAAGCGAGCGCGGTACAAGTAATGTTACCTCATCTGATATACAATAAAGGTGGAGCGCCAATATATACGCATTTGACTGTTCATAATTCATTGAATATAATTTATTCCTTGTTAGTACAAAAGGGTTAAACAGAAAAAGACGTGACGTTGTAACCGAGAGGATG…	CGGGGATGAATTGTGGTCAATATATCAGATCTAAGAGCCGACAGTTTCGATAAAGTTTCGAAATATTGCACCGATTTAATTCTCGGAATTTCAGGAACCTTCGACAAAATTTGCTTAATAACCCGCAAAAGAATTTGTAAATAAACTGTA
5306	8544	1	1	159	159	NC_001139	857273	857825	NC_001144	180660	180917	|gene note= GO_component: cytosol [goid 0005829] [evidence NAS] |neigh_up CDS[fcd=-1243](-,855269,856306) gene= RNR4 note= Rnr4p; |neigh_down CDS[fcd=743](+,858292,858609) gene= TIM13 note= Tim13p;	|gene gene= PSR2 |CDS[fcd=-501](+,180287,181480) gene= PSR2 note= Psr2p;	CGGTTCCCTTTCTTGCCTGAAATGCTCGTTCTAATGGAAAAAAAAAGAAATAAAGGTGGGCCTGCCCATTAGCAGGAAATTGGTACTTAATTATTGAAAAAAAAATTATTGGTTGCTAAGAGATTCGAACTCTTGCATCTTACGATACCTGAGTATTCCCACAGTTAACTGCGGTCAAGATATTTCTTGAATCAGGCGCCTTAGACCGCTCGGCCAAACAACCACTTATTTGTTGAAAGCGAGCGCGGTACAAGTAATGTTACCTCATCTGATATACAATAAAGGTGGAGCGCCAATATATACGCATTTGACTGTTCATAATTCATTGAATATAATTTATTCCTTGTTAGTACAAAAGGGTTAAACAGAAAAAGACGTGACGTTGTAACCGAGAGGATG…	CGGAGAAGAAGAAGAAGAAGATGACGAAGCAAAAGAAAAGCAAGACCATGTCGTTCATGAATATAACGTTGACGCAGATAGAAATTCCAGTATTAATGACGAGGCGCCACCACAACAGGGTCTGTATCAGGTGGGTCAAGAAGATATGAATCCACAATATGTCGCCAGCAGTCCTGATAATGATTTAAACTTGATACCTACAACGGAGGAGGACTTCTCTGACCTGACGCATTTGCAACCAGACCAGTACCATGCCC
5306	6557	1	1	0	0	NC_001139	857273	857825	NC_001141	269839	270270	|gene note= GO_component: cytosol [goid 0005829] [evidence NAS] |neigh_up CDS[fcd=-1243](-,855269,856306) gene= RNR4 note= Rnr4p; |neigh_down CDS[fcd=743](+,858292,858609) gene= TIM13 note= Tim13p;	|gene gene= MET30 note= synonym: ZRG11 |CDS[fcd=-1404](+,268650,270572) gene= MET30 note= Met30p;	CGGTTCCCTTTCTTGCCTGAAATGCTCGTTCTAATGGAAAAAAAAAGAAATAAAGGTGGGCCTGCCCATTAGCAGGAAATTGGTACTTAATTATTGAAAAAAAAATTATTGGTTGCTAAGAGATTCGAACTCTTGCATCTTACGATACCTGAGTATTCCCACAGTTAACTGCGGTCAAGATATTTCTTGAATCAGGCGCCTTAGACCGCTCGGCCAAACAACCACTTATTTGTTGAAAGCGAGCGCGGTACAAGTAATGTTACCTCATCTGATATACAATAAAGGTGGAGCGCCAATATATACGCATTTGACTGTTCATAATTCATTGAATATAATTTATTCCTTGTTAGTACAAAAGGGTTAAACAGAAAAAGACGTGACGTTGTAACCGAGAGGATG…	CGGCAGTGCTGACAAGACGGTCAAGGTATGGCACGTGGAGTCCAGGACATGCTACACCTTGAGAGGCCACACGGAATGGGTTAATTGCGTCAAATTGCATCCGAAAAGCTTTTCATGTTTTAGTTGCAGTGACGATACCACAATCCGAATGTGGGATATCAGGACCAATTCATGCCTAAAAGTGTTCAGGGGTCATGTAGGGCAGGTGCAAAAGATCATACCGCTTACCATTAAGGATGTAGAGAATCTAGCCACCGACAACACTTCTGATGGCAGCTCTCCGCAGGATGACCCAACAATGACTGATGGTGCAGACGAATCAGACACACCGTCGAACGAGCAAGAAACTGTCTTAGATGAAAACATACCTTATCCAACACATCTACTATCTTGCGGACT…
5306	5448	3	3	0	0	NC_001139	857273	857825	NC_001139	988373	988501	|gene note= GO_component: cytosol [goid 0005829] [evidence NAS] |neigh_up CDS[fcd=-1243](-,855269,856306) gene= RNR4 note= Rnr4p; |neigh_down CDS[fcd=743](+,858292,858609) gene= TIM13 note= Tim13p;	|gene gene= MGA1 |CDS[fcd=-383](+,988054,989424) gene= MGA1 note= Mga1p;	CGGTTCCCTTTCTTGCCTGAAATGCTCGTTCTAATGGAAAAAAAAAGAAATAAAGGTGGGCCTGCCCATTAGCAGGAAATTGGTACTTAATTATTGAAAAAAAAATTATTGGTTGCTAAGAGATTCGAACTCTTGCATCTTACGATACCTGAGTATTCCCACAGTTAACTGCGGTCAAGATATTTCTTGAATCAGGCGCCTTAGACCGCTCGGCCAAACAACCACTTATTTGTTGAAAGCGAGCGCGGTACAAGTAATGTTACCTCATCTGATATACAATAAAGGTGGAGCGCCAATATATACGCATTTGACTGTTCATAATTCATTGAATATAATTTATTCCTTGTTAGTACAAAAGGGTTAAACAGAAAAAGACGTGACGTTGTAACCGAGAGGATG…	CGGTATCTTGAATAAAATCCAAAGAAAGAGCACTGGTGTGGGAAAAGATGGTAAAAGAAAGAATATACTGTCACCAATATCTGTCAGTTACGTTGATGCTTCGAGGTTAAATGTTCTCTCTCAGCAAT
5306	11707	14	14	0	0	NC_001139	857273	857825	NC_001147	109385	109402	|gene note= GO_component: cytosol [goid 0005829] [evidence NAS] |neigh_up CDS[fcd=-1243](-,855269,856306) gene= RNR4 note= Rnr4p; |neigh_down CDS[fcd=743](+,858292,858609) gene= TIM13 note= Tim13p;	|gene gene= SHR5 note= synonym: ERF4 |CDS[fcd=-217](+,109176,109889) gene= SHR5 note= Shr5p;	CGGTTCCCTTTCTTGCCTGAAATGCTCGTTCTAATGGAAAAAAAAAGAAATAAAGGTGGGCCTGCCCATTAGCAGGAAATTGGTACTTAATTATTGAAAAAAAAATTATTGGTTGCTAAGAGATTCGAACTCTTGCATCTTACGATACCTGAGTATTCCCACAGTTAACTGCGGTCAAGATATTTCTTGAATCAGGCGCCTTAGACCGCTCGGCCAAACAACCACTTATTTGTTGAAAGCGAGCGCGGTACAAGTAATGTTACCTCATCTGATATACAATAAAGGTGGAGCGCCAATATATACGCATTTGACTGTTCATAATTCATTGAATATAATTTATTCCTTGTTAGTACAAAAGGGTTAAACAGAAAAAGACGTGACGTTGTAACCGAGAGGATG…	CGGGTGGTACGAGTGCC
5306	4671	19	19	2	2	NC_001139	857273	857825	NC_001139	279533	279648	|gene note= GO_component: cytosol [goid 0005829] [evidence NAS] |neigh_up CDS[fcd=-1243](-,855269,856306) gene= RNR4 note= Rnr4p; |neigh_down CDS[fcd=743](+,858292,858609) gene= TIM13 note= Tim13p;	|gene gene= NAB2 |CDS[fcd=939](-,278952,280529) gene= NAB2 note= Nab2p;	CGGTTCCCTTTCTTGCCTGAAATGCTCGTTCTAATGGAAAAAAAAAGAAATAAAGGTGGGCCTGCCCATTAGCAGGAAATTGGTACTTAATTATTGAAAAAAAAATTATTGGTTGCTAAGAGATTCGAACTCTTGCATCTTACGATACCTGAGTATTCCCACAGTTAACTGCGGTCAAGATATTTCTTGAATCAGGCGCCTTAGACCGCTCGGCCAAACAACCACTTATTTGTTGAAAGCGAGCGCGGTACAAGTAATGTTACCTCATCTGATATACAATAAAGGTGGAGCGCCAATATATACGCATTTGACTGTTCATAATTCATTGAATATAATTTATTCCTTGTTAGTACAAAAGGGTTAAACAGAAAAAGACGTGACGTTGTAACCGAGAGGATG…	CGGTTTCCTTTTTGCCGCCAATAAATCAGCTTTTCTTTTTTGAAATTCTTCACGAGTTCTTTCCATTTCCTTCATCAACTCTTCATCTTCATTTGGATGTAAAAACTCACAAGTT
5306	7912	1	1	0	0	NC_001139	857273	857825	NC_001143	310441	310872	|gene note= GO_component: cytosol [goid 0005829] [evidence NAS] |neigh_up CDS[fcd=-1243](-,855269,856306) gene= RNR4 note= Rnr4p; |neigh_down CDS[fcd=743](+,858292,858609) gene= TIM13 note= Tim13p;	|gene gene= NUP100 note= synonym: NSP100 |CDS[fcd=-813](+,309843,312722) gene= NUP100 note= Nup100p;	CGGTTCCCTTTCTTGCCTGAAATGCTCGTTCTAATGGAAAAAAAAAGAAATAAAGGTGGGCCTGCCCATTAGCAGGAAATTGGTACTTAATTATTGAAAAAAAAATTATTGGTTGCTAAGAGATTCGAACTCTTGCATCTTACGATACCTGAGTATTCCCACAGTTAACTGCGGTCAAGATATTTCTTGAATCAGGCGCCTTAGACCGCTCGGCCAAACAACCACTTATTTGTTGAAAGCGAGCGCGGTACAAGTAATGTTACCTCATCTGATATACAATAAAGGTGGAGCGCCAATATATACGCATTTGACTGTTCATAATTCATTGAATATAATTTATTCCTTGTTAGTACAAAAGGGTTAAACAGAAAAAGACGTGACGTTGTAACCGAGAGGATG…	CGGCAGCTTGTTTGGCAACCAACAATCTTCAGCGTTTGGGACAAATAATCAACAAGGAAGTCTATTTGGACAGCAATCTCAAAACACCAATAATGCGTTTGGTAATCAAAATCAGCTGGGGGGCAGTTCCTTCGGATCAAAACCAGTTGGTTCAGGGTCGCTGTTTGGCCAGAGCAACAACACTTTAGGTAATACAACCAATAATAGAAATGGATTGTTTGGTCAAATGAATTCCAGTAACCAAGGCAGTTCTAACAGTGGATTGTTTGGACAAAACTCGATGAACAGCAGCACTCAAGGGGTATTTGGACAAAACAATAATCAAATGCAAATTAATGGCAATAACAACAACAGTTTATTTGGAAAGGCAAACACCTTTTCAAATTCCGCATCAGGAGG…
5306	12191	5	5	0	0	NC_001139	857273	857825	NC_001147	527937	528158	|gene note= GO_component: cytosol [goid 0005829] [evidence NAS] |neigh_up CDS[fcd=-1243](-,855269,856306) gene= RNR4 note= Rnr4p; |neigh_down CDS[fcd=743](+,858292,858609) gene= TIM13 note= Tim13p;	|gene gene= INP53 note= synonyms: SOP2, SJL3 |CDS[fcd=-2768](+,525279,528602) gene= INP53 note= Inp53p;	CGGTTCCCTTTCTTGCCTGAAATGCTCGTTCTAATGGAAAAAAAAAGAAATAAAGGTGGGCCTGCCCATTAGCAGGAAATTGGTACTTAATTATTGAAAAAAAAATTATTGGTTGCTAAGAGATTCGAACTCTTGCATCTTACGATACCTGAGTATTCCCACAGTTAACTGCGGTCAAGATATTTCTTGAATCAGGCGCCTTAGACCGCTCGGCCAAACAACCACTTATTTGTTGAAAGCGAGCGCGGTACAAGTAATGTTACCTCATCTGATATACAATAAAGGTGGAGCGCCAATATATACGCATTTGACTGTTCATAATTCATTGAATATAATTTATTCCTTGTTAGTACAAAAGGGTTAAACAGAAAAAGACGTGACGTTGTAACCGAGAGGATG…	CGGGTTCTCTGATATCGGATCTTCTCAGCCTTGATCTGGATAATAAGAGCACTGATGGATTCAAAAGCTCTTCTGAAAGTTCTCTACTTGATATTGATCCGATAATGGCACAACCGACAGCGTCCAGCGTTGCTTCTTCGTCACCTGTGTCTTCAGCATCGGCTTCACTACAACCTGTCAGAACTCAAAACAGTAGCCAGTCGCGTACCCCCATAAAGAAA
5306	2694	8	8	0	0	NC_001139	857273	857825	NC_001136	941682	941846	|gene note= GO_component: cytosol [goid 0005829] [evidence NAS] |neigh_up CDS[fcd=-1243](-,855269,856306) gene= RNR4 note= Rnr4p; |neigh_down CDS[fcd=743](+,858292,858609) gene= TIM13 note= Tim13p;	|gene |CDS[fcd=1652](-,941053,943416) note= Ydr239cp;	CGGTTCCCTTTCTTGCCTGAAATGCTCGTTCTAATGGAAAAAAAAAGAAATAAAGGTGGGCCTGCCCATTAGCAGGAAATTGGTACTTAATTATTGAAAAAAAAATTATTGGTTGCTAAGAGATTCGAACTCTTGCATCTTACGATACCTGAGTATTCCCACAGTTAACTGCGGTCAAGATATTTCTTGAATCAGGCGCCTTAGACCGCTCGGCCAAACAACCACTTATTTGTTGAAAGCGAGCGCGGTACAAGTAATGTTACCTCATCTGATATACAATAAAGGTGGAGCGCCAATATATACGCATTTGACTGTTCATAATTCATTGAATATAATTTATTCCTTGTTAGTACAAAAGGGTTAAACAGAAAAAGACGTGACGTTGTAACCGAGAGGATG…	CGGCAAGTTAGGAGGCGCTTGTAAAAAGTTAGAAGTCTTGTAATACTTTAGTCGCAGTTCTTCTACGTAACTAGAAACCAAAGGCACGGACTTTTCCGATTTGTTCGATACGACAGATGTTAACGGTGAACATTTGACAGATCTTTCGCTTGGGGCATCATGTA
5306	11711	54	54	0	0	NC_001139	857273	857825	NC_001147	109613	109793	|gene note= GO_component: cytosol [goid 0005829] [evidence NAS] |neigh_up CDS[fcd=-1243](-,855269,856306) gene= RNR4 note= Rnr4p; |neigh_down CDS[fcd=743](+,858292,858609) gene= TIM13 note= Tim13p;	|gene gene= SHR5 note= synonym: ERF4 |CDS[fcd=-527](+,109176,109889) gene= SHR5 note= Shr5p;	CGGTTCCCTTTCTTGCCTGAAATGCTCGTTCTAATGGAAAAAAAAAGAAATAAAGGTGGGCCTGCCCATTAGCAGGAAATTGGTACTTAATTATTGAAAAAAAAATTATTGGTTGCTAAGAGATTCGAACTCTTGCATCTTACGATACCTGAGTATTCCCACAGTTAACTGCGGTCAAGATATTTCTTGAATCAGGCGCCTTAGACCGCTCGGCCAAACAACCACTTATTTGTTGAAAGCGAGCGCGGTACAAGTAATGTTACCTCATCTGATATACAATAAAGGTGGAGCGCCAATATATACGCATTTGACTGTTCATAATTCATTGAATATAATTTATTCCTTGTTAGTACAAAAGGGTTAAACAGAAAAAGACGTGACGTTGTAACCGAGAGGATG…	CGGGTAAACGGATTCTTGCTGCGTGAAGAAGGTGAGGTGTTCGGGTGGCGTAACTTAAGTGGCCTGTTGCTCGATATGCTTACGGGCGGTCTGTGGAGCTGGGTTTTGGGGCCCCTTCTTTCTAGACCTGTGTTTCAGGAGTCTCTCGCGTTAGAGCAGTACGTGGCGCAGCTAAACTCG
5306	5163	2	2	0	0	NC_001139	857273	857825	NC_001139	732808	732828	|gene note= GO_component: cytosol [goid 0005829] [evidence NAS] |neigh_up CDS[fcd=-1243](-,855269,856306) gene= RNR4 note= Rnr4p; |neigh_down CDS[fcd=743](+,858292,858609) gene= TIM13 note= Tim13p;	|gene gene= MEP1 note= synonym: AMT1 |CDS[fcd=114](-,731454,732932) gene= MEP1 note= Mep1p;	CGGTTCCCTTTCTTGCCTGAAATGCTCGTTCTAATGGAAAAAAAAAGAAATAAAGGTGGGCCTGCCCATTAGCAGGAAATTGGTACTTAATTATTGAAAAAAAAATTATTGGTTGCTAAGAGATTCGAACTCTTGCATCTTACGATACCTGAGTATTCCCACAGTTAACTGCGGTCAAGATATTTCTTGAATCAGGCGCCTTAGACCGCTCGGCCAAACAACCACTTATTTGTTGAAAGCGAGCGCGGTACAAGTAATGTTACCTCATCTGATATACAATAAAGGTGGAGCGCCAATATATACGCATTTGACTGTTCATAATTCATTGAATATAATTTATTCCTTGTTAGTACAAAAGGGTTAAACAGAAAAAGACGTGACGTTGTAACCGAGAGGATG…	CGGAGTACAAGAATCCCAAT
5306	6398	62	62	0	0	NC_001139	857273	857825	NC_001141	141106	141357	|gene note= GO_component: cytosol [goid 0005829] [evidence NAS] |neigh_up CDS[fcd=-1243](-,855269,856306) gene= RNR4 note= Rnr4p; |neigh_down CDS[fcd=743](+,858292,858609) gene= TIM13 note= Tim13p;	|gene gene= PRM5 |CDS[fcd=335](-,140610,141566) gene= PRM5 note= Prm5p;	CGGTTCCCTTTCTTGCCTGAAATGCTCGTTCTAATGGAAAAAAAAAGAAATAAAGGTGGGCCTGCCCATTAGCAGGAAATTGGTACTTAATTATTGAAAAAAAAATTATTGGTTGCTAAGAGATTCGAACTCTTGCATCTTACGATACCTGAGTATTCCCACAGTTAACTGCGGTCAAGATATTTCTTGAATCAGGCGCCTTAGACCGCTCGGCCAAACAACCACTTATTTGTTGAAAGCGAGCGCGGTACAAGTAATGTTACCTCATCTGATATACAATAAAGGTGGAGCGCCAATATATACGCATTTGACTGTTCATAATTCATTGAATATAATTTATTCCTTGTTAGTACAAAAGGGTTAAACAGAAAAAGACGTGACGTTGTAACCGAGAGGATG…	CGGGACTAATATCGGACTCGCTGATATGGACCTGATCTTGGAAATTTTCTTTGGCGGGATAATCCATATATGGGGAATCGCCGTAAAACTGGGTATGTTGTGTGGAAAACATCTTTGATTCGTAGTCCTGAACACTTCTGGTCAACCTATGCGAAGAATAAGTTGTTATTACCCACCATAGCAATATTGCCAAAAAAATCACTCCCGCGATTCCCCCCACTACAATGAAAACTGTTCCATTAGGCATATCC
5306	12257	11	11	0	0	NC_001139	857273	857825	NC_001147	578167	578273	|gene note= GO_component: cytosol [goid 0005829] [evidence NAS] |neigh_up CDS[fcd=-1243](-,855269,856306) gene= RNR4 note= Rnr4p; |neigh_down CDS[fcd=743](+,858292,858609) gene= TIM13 note= Tim13p;	|neigh_up CDS[fcd=-3121](+,575099,577627) gene= EFT1 note= Eft1p; |neigh_down CDS[fcd=345](+,578565,579794) gene= BAG7 note= Bag7p;	CGGTTCCCTTTCTTGCCTGAAATGCTCGTTCTAATGGAAAAAAAAAGAAATAAAGGTGGGCCTGCCCATTAGCAGGAAATTGGTACTTAATTATTGAAAAAAAAATTATTGGTTGCTAAGAGATTCGAACTCTTGCATCTTACGATACCTGAGTATTCCCACAGTTAACTGCGGTCAAGATATTTCTTGAATCAGGCGCCTTAGACCGCTCGGCCAAACAACCACTTATTTGTTGAAAGCGAGCGCGGTACAAGTAATGTTACCTCATCTGATATACAATAAAGGTGGAGCGCCAATATATACGCATTTGACTGTTCATAATTCATTGAATATAATTTATTCCTTGTTAGTACAAAAGGGTTAAACAGAAAAAGACGTGACGTTGTAACCGAGAGGATG…	CGGAGGGGCAACCAAAGTATATATCTCATTATGGCCGATACTTCTAGAGGCGCACTAACAGAAGCACCTCAGCCCCTGCAGGTGAAAGAAAGAGGTAATTAATTTT
5306	7351	2	2	0	0	NC_001139	857273	857825	NC_001142	579328	579618	|gene note= GO_component: cytosol [goid 0005829] [evidence NAS] |neigh_up CDS[fcd=-1243](-,855269,856306) gene= RNR4 note= Rnr4p; |neigh_down CDS[fcd=743](+,858292,858609) gene= TIM13 note= Tim13p;	|gene gene= BNA2 |CDS[fcd=-620](+,578853,580214) gene= BNA2 note= Bna2p;	CGGTTCCCTTTCTTGCCTGAAATGCTCGTTCTAATGGAAAAAAAAAGAAATAAAGGTGGGCCTGCCCATTAGCAGGAAATTGGTACTTAATTATTGAAAAAAAAATTATTGGTTGCTAAGAGATTCGAACTCTTGCATCTTACGATACCTGAGTATTCCCACAGTTAACTGCGGTCAAGATATTTCTTGAATCAGGCGCCTTAGACCGCTCGGCCAAACAACCACTTATTTGTTGAAAGCGAGCGCGGTACAAGTAATGTTACCTCATCTGATATACAATAAAGGTGGAGCGCCAATATATACGCATTTGACTGTTCATAATTCATTGAATATAATTTATTCCTTGTTAGTACAAAAGGGTTAAACAGAAAAAGACGTGACGTTGTAACCGAGAGGATG…	CGGGTGTTTGGACTTGGAAAATATTACAACGATAAACACATTTACGGGAACCGTTGACGAAAGTTGGTTTTATCTGGTCAGCGTGCGGTTTGAAAAAATCGGCAGCGCTTGTTTAAACCATGGGTTGCAGATATTGAGAGCCATTAGAAGCGGTGATAAAGGAGACGCTAACGTGATAGACGGGTTGGAGGGCTTGGCTGCAACGATCGAAAGGTTATCGAAAGCCTTGATGGAAATGGAGCTTAAGTGTGAACCCAATGTATTTTATTTCAAGATAAGACCATTTTTGG
5306	10937	89	89	4	4	NC_001139	857273	857825	NC_001146	236110	236285	|gene note= GO_component: cytosol [goid 0005829] [evidence NAS] |neigh_up CDS[fcd=-1243](-,855269,856306) gene= RNR4 note= Rnr4p; |neigh_down CDS[fcd=743](+,858292,858609) gene= TIM13 note= Tim13p;	|gene gene= ALG9 |CDS[fcd=1467](-,235997,237664) gene= ALG9 note= Alg9p;	CGGTTCCCTTTCTTGCCTGAAATGCTCGTTCTAATGGAAAAAAAAAGAAATAAAGGTGGGCCTGCCCATTAGCAGGAAATTGGTACTTAATTATTGAAAAAAAAATTATTGGTTGCTAAGAGATTCGAACTCTTGCATCTTACGATACCTGAGTATTCCCACAGTTAACTGCGGTCAAGATATTTCTTGAATCAGGCGCCTTAGACCGCTCGGCCAAACAACCACTTATTTGTTGAAAGCGAGCGCGGTACAAGTAATGTTACCTCATCTGATATACAATAAAGGTGGAGCGCCAATATATACGCATTTGACTGTTCATAATTCATTGAATATAATTTATTCCTTGTTAGTACAAAAGGGTTAAACAGAAAAAGACGTGACGTTGTAACCGAGAGGATG…	CGGTACGTAAAATGCTCTACCCAAAATCTTAGAATTTTCACCGTCGATGAATGCAGCACATGCCAGCTTATTCCAGTTATCCATCAGATGTAGAGGGTTGAAAACGTCTTTTGTTAAATTTATTGGGGCGACGATGTCAATAAAATAATCACATCTAGTGATCGGCCACTCTTTA
5306	12267	76	76	6	6	NC_001139	857273	857825	NC_001147	586070	586192	|gene note= GO_component: cytosol [goid 0005829] [evidence NAS] |neigh_up CDS[fcd=-1243](-,855269,856306) gene= RNR4 note= Rnr4p; |neigh_down CDS[fcd=743](+,858292,858609) gene= TIM13 note= Tim13p;	|gene gene= RUP1 |CDS[fcd=194](-,584310,586325) gene= RUP1 note= Rup1p;	CGGTTCCCTTTCTTGCCTGAAATGCTCGTTCTAATGGAAAAAAAAAGAAATAAAGGTGGGCCTGCCCATTAGCAGGAAATTGGTACTTAATTATTGAAAAAAAAATTATTGGTTGCTAAGAGATTCGAACTCTTGCATCTTACGATACCTGAGTATTCCCACAGTTAACTGCGGTCAAGATATTTCTTGAATCAGGCGCCTTAGACCGCTCGGCCAAACAACCACTTATTTGTTGAAAGCGAGCGCGGTACAAGTAATGTTACCTCATCTGATATACAATAAAGGTGGAGCGCCAATATATACGCATTTGACTGTTCATAATTCATTGAATATAATTTATTCCTTGTTAGTACAAAAGGGTTAAACAGAAAAAGACGTGACGTTGTAACCGAGAGGATG…	CGGCATATCAATGTCTTGGTCCCCGTTGTTCGGAACATCGCAGGGCTTGGTTCCAGCCACTATTTTGTTCTCAGAAATCCTAGGCTGACTGCCATCATTCTCCTCACCCATTTCCGCTTGCT
5306	8077	5	5	0	0	NC_001139	857273	857825	NC_001143	451388	451514	|gene note= GO_component: cytosol [goid 0005829] [evidence NAS] |neigh_up CDS[fcd=-1243](-,855269,856306) gene= RNR4 note= Rnr4p; |neigh_down CDS[fcd=743](+,858292,858609) gene= TIM13 note= Tim13p;	|gene gene= MEH1 note= synonyms: GSE2, EGO1 |CDS[fcd=-374](+,451077,451631) gene= MEH1 note= Meh1p;	CGGTTCCCTTTCTTGCCTGAAATGCTCGTTCTAATGGAAAAAAAAAGAAATAAAGGTGGGCCTGCCCATTAGCAGGAAATTGGTACTTAATTATTGAAAAAAAAATTATTGGTTGCTAAGAGATTCGAACTCTTGCATCTTACGATACCTGAGTATTCCCACAGTTAACTGCGGTCAAGATATTTCTTGAATCAGGCGCCTTAGACCGCTCGGCCAAACAACCACTTATTTGTTGAAAGCGAGCGCGGTACAAGTAATGTTACCTCATCTGATATACAATAAAGGTGGAGCGCCAATATATACGCATTTGACTGTTCATAATTCATTGAATATAATTTATTCCTTGTTAGTACAAAAGGGTTAAACAGAAAAAGACGTGACGTTGTAACCGAGAGGATG…	CGGGAAGACGAAAGGAGTGCAGGTGATGACAACCTCAGTGGGCACTCAGTGCCTTCAAGCGGATCCGCACAGGCAACTACTCACCAAACTGCACCAAGGACTAATACGTTTACTCTGCTTACATCA
5306	7110	1	1	0	0	NC_001139	857273	857825	NC_001142	344317	344514	|gene note= GO_component: cytosol [goid 0005829] [evidence NAS] |neigh_up CDS[fcd=-1243](-,855269,856306) gene= RNR4 note= Rnr4p; |neigh_down CDS[fcd=743](+,858292,858609) gene= TIM13 note= Tim13p;	|gene gene= MTR4 note= synonym: DOB1 |CDS[fcd=-1898](+,342517,345738) gene= MTR4 note= Mtr4p;	CGGTTCCCTTTCTTGCCTGAAATGCTCGTTCTAATGGAAAAAAAAAGAAATAAAGGTGGGCCTGCCCATTAGCAGGAAATTGGTACTTAATTATTGAAAAAAAAATTATTGGTTGCTAAGAGATTCGAACTCTTGCATCTTACGATACCTGAGTATTCCCACAGTTAACTGCGGTCAAGATATTTCTTGAATCAGGCGCCTTAGACCGCTCGGCCAAACAACCACTTATTTGTTGAAAGCGAGCGCGGTACAAGTAATGTTACCTCATCTGATATACAATAAAGGTGGAGCGCCAATATATACGCATTTGACTGTTCATAATTCATTGAATATAATTTATTCCTTGTTAGTACAAAAGGGTTAAACAGAAAAAGACGTGACGTTGTAACCGAGAGGATG…	CGGAGTTTATGTTGGAGCATTCTTTCTTCCAATTTCAAAACGTTATTTCAGTACCAGTTATGGAAAAGAAACTTGCTGAACTGAAAAAAGACTTTGATGGCATCGAAGTCGAAGATGAAGAAAATGTTAAAGAATACCATGAGATTGAGCAGGCTATCAAAGGTTACCGTGAAGATGTTCGTCAAGTTGTCACCCAT
5306	6870	1	1	0	0	NC_001139	857273	857825	NC_001142	123412	123537	|gene note= GO_component: cytosol [goid 0005829] [evidence NAS] |neigh_up CDS[fcd=-1243](-,855269,856306) gene= RNR4 note= Rnr4p; |neigh_down CDS[fcd=743](+,858292,858609) gene= TIM13 note= Tim13p;	|neigh_up CDS[fcd=-530](-,122261,122944) gene= CIS3 note= Cis3p; |neigh_down CDS[fcd=2850](-,123832,126324) gene= FAR1 note= Far1p;	CGGTTCCCTTTCTTGCCTGAAATGCTCGTTCTAATGGAAAAAAAAAGAAATAAAGGTGGGCCTGCCCATTAGCAGGAAATTGGTACTTAATTATTGAAAAAAAAATTATTGGTTGCTAAGAGATTCGAACTCTTGCATCTTACGATACCTGAGTATTCCCACAGTTAACTGCGGTCAAGATATTTCTTGAATCAGGCGCCTTAGACCGCTCGGCCAAACAACCACTTATTTGTTGAAAGCGAGCGCGGTACAAGTAATGTTACCTCATCTGATATACAATAAAGGTGGAGCGCCAATATATACGCATTTGACTGTTCATAATTCATTGAATATAATTTATTCCTTGTTAGTACAAAAGGGTTAAACAGAAAAAGACGTGACGTTGTAACCGAGAGGATG…	CGGAACAAATTAGCCACATCGACGTTTCTTTTACTATACAGCTCGAACAAGCTAACTTGAAATGCTACAACCATGTTGGTATAATTGTGTACAGACACGTGCATTTTTGGTACGAAGAGGGTTAC
5306	8998	9	9	0	0	NC_001139	857273	857825	NC_001144	541217	541390	|gene note= GO_component: cytosol [goid 0005829] [evidence NAS] |neigh_up CDS[fcd=-1243](-,855269,856306) gene= RNR4 note= Rnr4p; |neigh_down CDS[fcd=743](+,858292,858609) gene= TIM13 note= Tim13p;	|gene |CDS[fcd=272](-,540811,541575) note= Ylr194cp;	CGGTTCCCTTTCTTGCCTGAAATGCTCGTTCTAATGGAAAAAAAAAGAAATAAAGGTGGGCCTGCCCATTAGCAGGAAATTGGTACTTAATTATTGAAAAAAAAATTATTGGTTGCTAAGAGATTCGAACTCTTGCATCTTACGATACCTGAGTATTCCCACAGTTAACTGCGGTCAAGATATTTCTTGAATCAGGCGCCTTAGACCGCTCGGCCAAACAACCACTTATTTGTTGAAAGCGAGCGCGGTACAAGTAATGTTACCTCATCTGATATACAATAAAGGTGGAGCGCCAATATATACGCATTTGACTGTTCATAATTCATTGAATATAATTTATTCCTTGTTAGTACAAAAGGGTTAAACAGAAAAAGACGTGACGTTGTAACCGAGAGGATG…	CGGTGGGCTGCACAGAGGCAGTTGAAGTTGTGCTTACGGCAGAGTTGCTTTCGGCCACCCACCATAGGTACTGTGTCGTGGTTTTGCCTTGTGCATCCGTCGTCACTACGGTGGTACTTGGAGCCACAGCATAGGTGTTGCTGACGACGTTGCTAGTTTGTACTAAGCTTTTT
5306	10927	1	1	0	0	NC_001139	857273	857825	NC_001146	231975	233877	|gene note= GO_component: cytosol [goid 0005829] [evidence NAS] |neigh_up CDS[fcd=-1243](-,855269,856306) gene= RNR4 note= Rnr4p; |neigh_down CDS[fcd=743](+,858292,858609) gene= TIM13 note= Tim13p;	|gene gene= POP1 |CDS[fcd=770](-,231069,233696) gene= POP1 note= Pop1p;	CGGTTCCCTTTCTTGCCTGAAATGCTCGTTCTAATGGAAAAAAAAAGAAATAAAGGTGGGCCTGCCCATTAGCAGGAAATTGGTACTTAATTATTGAAAAAAAAATTATTGGTTGCTAAGAGATTCGAACTCTTGCATCTTACGATACCTGAGTATTCCCACAGTTAACTGCGGTCAAGATATTTCTTGAATCAGGCGCCTTAGACCGCTCGGCCAAACAACCACTTATTTGTTGAAAGCGAGCGCGGTACAAGTAATGTTACCTCATCTGATATACAATAAAGGTGGAGCGCCAATATATACGCATTTGACTGTTCATAATTCATTGAATATAATTTATTCCTTGTTAGTACAAAAGGGTTAAACAGAAAAAGACGTGACGTTGTAACCGAGAGGATG…	CGGTTCAGTAGATGCCATAACGGTAGCAGCCAGAACCATGGTAACACAACAATCCAATCCCTGGTCTTGAGCCTTCTTATTATGACTAATGGAATAGAAGGATCGTCACTTTCTTTGAACGGGACTGTAGTTTTATTGATGCTGTTCGGTGTGGCAGTTAGCAATTTGTAACGTCTCGCAGAAATTTCTTTTAATGTGTTTTGGTTGTTGTATGATTGAGTACGTGATTCAGGGTCACATAATTCGTTAAAAACGGCGTTTATTTCGTCTTGAGGATAGTTTTCATGCAGTGATAAAATGTCGTCAGAATTAACAGTCTTCCTCTGTGAATCATTTAATTTCTTTGGAGCAGCTAGATGACGCGGATCTATGGCTTCAAATGCAAACGTACACCTCTGT…
5306	3748	7	7	0	0	NC_001139	857273	857825	NC_001137	337969	338206	|gene note= GO_component: cytosol [goid 0005829] [evidence NAS] |neigh_up CDS[fcd=-1243](-,855269,856306) gene= RNR4 note= Rnr4p; |neigh_down CDS[fcd=743](+,858292,858609) gene= TIM13 note= Tim13p;	|gene gene= TRP2 |CDS[fcd=-142](+,337945,339468) gene= TRP2 note= Trp2p;	CGGTTCCCTTTCTTGCCTGAAATGCTCGTTCTAATGGAAAAAAAAAGAAATAAAGGTGGGCCTGCCCATTAGCAGGAAATTGGTACTTAATTATTGAAAAAAAAATTATTGGTTGCTAAGAGATTCGAACTCTTGCATCTTACGATACCTGAGTATTCCCACAGTTAACTGCGGTCAAGATATTTCTTGAATCAGGCGCCTTAGACCGCTCGGCCAAACAACCACTTATTTGTTGAAAGCGAGCGCGGTACAAGTAATGTTACCTCATCTGATATACAATAAAGGTGGAGCGCCAATATATACGCATTTGACTGTTCATAATTCATTGAATATAATTTATTCCTTGTTAGTACAAAAGGGTTAAACAGAAAAAGACGTGACGTTGTAACCGAGAGGATG…	CGGATATTGACTCTCTAAAGCAATTACAGCAGCAAAATGACGATAGTTCCATAAATATGTATCCCGTGTATGCGTATTTGCCATCATTGGATCTGACTCCTCACGTGGCATATCTAAAATTGGCACAATTGAACAACCCTGATAGAAAGGAATCATTTCTGTTGGAAAGTGCTAAGACAAATAATGAATTAGATCGTTATTCATTCATAGGTATCTCGCCACGCAAGACCATCAAAA
5306	5182	4	4	0	0	NC_001139	857273	857825	NC_001139	749951	750115	|gene note= GO_component: cytosol [goid 0005829] [evidence NAS] |neigh_up CDS[fcd=-1243](-,855269,856306) gene= RNR4 note= Rnr4p; |neigh_down CDS[fcd=743](+,858292,858609) gene= TIM13 note= Tim13p;	|gene gene= UTP8 |CDS[fcd=63](-,747955,750096) gene= UTP8 note= Utp8p;	CGGTTCCCTTTCTTGCCTGAAATGCTCGTTCTAATGGAAAAAAAAAGAAATAAAGGTGGGCCTGCCCATTAGCAGGAAATTGGTACTTAATTATTGAAAAAAAAATTATTGGTTGCTAAGAGATTCGAACTCTTGCATCTTACGATACCTGAGTATTCCCACAGTTAACTGCGGTCAAGATATTTCTTGAATCAGGCGCCTTAGACCGCTCGGCCAAACAACCACTTATTTGTTGAAAGCGAGCGCGGTACAAGTAATGTTACCTCATCTGATATACAATAAAGGTGGAGCGCCAATATATACGCATTTGACTGTTCATAATTCATTGAATATAATTTATTCCTTGTTAGTACAAAAGGGTTAAACAGAAAAAGACGTGACGTTGTAACCGAGAGGATG…	CGGAAATACCTAACGTTATGTTATTTGTAGATTCATTAAAGGTGCCATCTGCGACTTGAACGTAATCTGCTTGTAAAGAAAAATTGCTCAATGAAGCAATTTTTGGGAGAGTTGCTAGTCTAAATGGTTGAGACAGGGATGGCATTTTGAATCTTTACTATCCT
5306	6648	3	3	0	0	NC_001139	857273	857825	NC_001141	360428	360532	|gene note= GO_component: cytosol [goid 0005829] [evidence NAS] |neigh_up CDS[fcd=-1243](-,855269,856306) gene= RNR4 note= Rnr4p; |neigh_down CDS[fcd=743](+,858292,858609) gene= TIM13 note= Tim13p;	|neigh_up CDS[fcd=-87](-,357412,360393) gene= MPH1 note= Mph1p; |neigh_down CDS[fcd=402](+,360882,362921) gene= AIM21 note= Aim21p;	CGGTTCCCTTTCTTGCCTGAAATGCTCGTTCTAATGGAAAAAAAAAGAAATAAAGGTGGGCCTGCCCATTAGCAGGAAATTGGTACTTAATTATTGAAAAAAAAATTATTGGTTGCTAAGAGATTCGAACTCTTGCATCTTACGATACCTGAGTATTCCCACAGTTAACTGCGGTCAAGATATTTCTTGAATCAGGCGCCTTAGACCGCTCGGCCAAACAACCACTTATTTGTTGAAAGCGAGCGCGGTACAAGTAATGTTACCTCATCTGATATACAATAAAGGTGGAGCGCCAATATATACGCATTTGACTGTTCATAATTCATTGAATATAATTTATTCCTTGTTAGTACAAAAGGGTTAAACAGAAAAAGACGTGACGTTGTAACCGAGAGGATG…	CGGAATGTGTTGAATAAAACTGAAGTGAGCTACTATATCTTGAATCACAATATCTTAGCTCCGTGATAGAGCATAGGGCACCTCTATTGATCTCTTCGTGATGC
5306	2523	1	1	0	0	NC_001139	857273	857825	NC_001136	770091	770111	|gene note= GO_component: cytosol [goid 0005829] [evidence NAS] |neigh_up CDS[fcd=-1243](-,855269,856306) gene= RNR4 note= Rnr4p; |neigh_down CDS[fcd=743](+,858292,858609) gene= TIM13 note= Tim13p;	|neigh_up CDS[fcd=-579](+,769522,769935) gene= RPA14 note= Rpa14p; |neigh_down CDS[fcd=253](+,770354,771451) gene= HOM2 note= Hom2p;	CGGTTCCCTTTCTTGCCTGAAATGCTCGTTCTAATGGAAAAAAAAAGAAATAAAGGTGGGCCTGCCCATTAGCAGGAAATTGGTACTTAATTATTGAAAAAAAAATTATTGGTTGCTAAGAGATTCGAACTCTTGCATCTTACGATACCTGAGTATTCCCACAGTTAACTGCGGTCAAGATATTTCTTGAATCAGGCGCCTTAGACCGCTCGGCCAAACAACCACTTATTTGTTGAAAGCGAGCGCGGTACAAGTAATGTTACCTCATCTGATATACAATAAAGGTGGAGCGCCAATATATACGCATTTGACTGTTCATAATTCATTGAATATAATTTATTCCTTGTTAGTACAAAAGGGTTAAACAGAAAAAGACGTGACGTTGTAACCGAGAGGATG…	CGGCAGCGGCCTCAAAGTAC
5306	7810	3	3	0	0	NC_001139	857273	857825	NC_001143	230873	231020	|gene note= GO_component: cytosol [goid 0005829] [evidence NAS] |neigh_up CDS[fcd=-1243](-,855269,856306) gene= RNR4 note= Rnr4p; |neigh_down CDS[fcd=743](+,858292,858609) gene= TIM13 note= Tim13p;	|neigh_up CDS[fcd=-1422](-,228583,229524) gene= KTI12 note= Kti12p; |neigh_down CDS[fcd=925](+,231871,233535) gene= HAP4 note= Hap4p;	CGGTTCCCTTTCTTGCCTGAAATGCTCGTTCTAATGGAAAAAAAAAGAAATAAAGGTGGGCCTGCCCATTAGCAGGAAATTGGTACTTAATTATTGAAAAAAAAATTATTGGTTGCTAAGAGATTCGAACTCTTGCATCTTACGATACCTGAGTATTCCCACAGTTAACTGCGGTCAAGATATTTCTTGAATCAGGCGCCTTAGACCGCTCGGCCAAACAACCACTTATTTGTTGAAAGCGAGCGCGGTACAAGTAATGTTACCTCATCTGATATACAATAAAGGTGGAGCGCCAATATATACGCATTTGACTGTTCATAATTCATTGAATATAATTTATTCCTTGTTAGTACAAAAGGGTTAAACAGAAAAAGACGTGACGTTGTAACCGAGAGGATG…	CGGAGGTTGATCGCACGGCAAATACATAAGAACCTTCTCCGCAATACGGGCTTTCCTCAATTTTCTTGGCCAAAAAGCGAGTCGGCCCCGAGCTACAAATCGGGAACAACGGAGGAATAGAGCGACAAGTTGATTCGGTCGTGCAGC
5306	870	2	2	0	0	NC_001139	857273	857825	NC_001134	473709	474128	|gene note= GO_component: cytosol [goid 0005829] [evidence NAS] |neigh_up CDS[fcd=-1243](-,855269,856306) gene= RNR4 note= Rnr4p; |neigh_down CDS[fcd=743](+,858292,858609) gene= TIM13 note= Tim13p;	|gene gene= LYS2 |CDS[fcd=2](-,469742,473920) gene= LYS2 note= Lys2p;	CGGTTCCCTTTCTTGCCTGAAATGCTCGTTCTAATGGAAAAAAAAAGAAATAAAGGTGGGCCTGCCCATTAGCAGGAAATTGGTACTTAATTATTGAAAAAAAAATTATTGGTTGCTAAGAGATTCGAACTCTTGCATCTTACGATACCTGAGTATTCCCACAGTTAACTGCGGTCAAGATATTTCTTGAATCAGGCGCCTTAGACCGCTCGGCCAAACAACCACTTATTTGTTGAAAGCGAGCGCGGTACAAGTAATGTTACCTCATCTGATATACAATAAAGGTGGAGCGCCAATATATACGCATTTGACTGTTCATAATTCATTGAATATAATTTATTCCTTGTTAGTACAAAAGGGTTAAACAGAAAAAGACGTGACGTTGTAACCGAGAGGATG…	CGGTTACTCTATATATCAATGCAGCCCATACACTCAAAGCGACAGCGTATTTGTTAGAAAAACTATCATGAGGCACATCGAGCTGAGGTAGCTGTAACGAATATGTAGCTTGTTTCGTATAAGGTTCTTGTTGTGGGCGTAAAAAGTCATGTGGTAACACTGAAAGAGTTGGATTATCCAACTTCTCTATCCAGACCTTTTCGTTAGTCATTAGTGAGTAACTCTGTGATATCTCTCTATAATTAGCAGTTTTTCACTGAAATTCCAGGAAAGGTAATAAACTCAGATTTTTTTTTATACTATTGGCTGCTTGTTACTTATATATCTTGAACTTCTCCCAGCGGGTCTTCAAATACATTTGGGCGATGTTCATGTTCATTAGGCAGGTATTTCGACATT…
5306	9843	1	1	0	0	NC_001139	857273	857825	NC_001145	193887	195908	|gene note= GO_component: cytosol [goid 0005829] [evidence NAS] |neigh_up CDS[fcd=-1243](-,855269,856306) gene= RNR4 note= Rnr4p; |neigh_down CDS[fcd=743](+,858292,858609) gene= TIM13 note= Tim13p;	|gene gene= CAT2 note= synonym: YCAT |CDS(+,192788,194800) gene= CAT2 note= Cat2p; |gene gene= VPS71 note= synonym: SWC6 |CDS(-,194913,195755) gene= VPS71 note= Vps71p;	CGGTTCCCTTTCTTGCCTGAAATGCTCGTTCTAATGGAAAAAAAAAGAAATAAAGGTGGGCCTGCCCATTAGCAGGAAATTGGTACTTAATTATTGAAAAAAAAATTATTGGTTGCTAAGAGATTCGAACTCTTGCATCTTACGATACCTGAGTATTCCCACAGTTAACTGCGGTCAAGATATTTCTTGAATCAGGCGCCTTAGACCGCTCGGCCAAACAACCACTTATTTGTTGAAAGCGAGCGCGGTACAAGTAATGTTACCTCATCTGATATACAATAAAGGTGGAGCGCCAATATATACGCATTTGACTGTTCATAATTCATTGAATATAATTTATTCCTTGTTAGTACAAAAGGGTTAAACAGAAAAAGACGTGACGTTGTAACCGAGAGGATG…	CGGTAATGGTTCATCAGGTTTCTTAGCTGAACACTCGAAGATGGATGGTACGCCAACATTGTTTTTAAATAACTACGTTTGTCAGCAGTTGAATAAACTAGATGTGGATGACTTCATGAGAAAAGTAATTACGCCATCATCTACGGTGGCAATGAAACCTATGGAACTGCCCTTCATTATCACACCGAAGATTCATAAAGCAATCGAATCTGCCCAACTACAATTTAAGGAAACAATTGGTGAGCATGACCTACGTGTTTGGCACTACAACAAATACGGAAAAACGTTTATAAAACGCCATGGCATGTCACCTGATGCATTTATTCAACAAGTTATCCAACTGGCGGTTTTCAAATATCTGAAACGACAACTACCAACTTACGAGGCTGCTTCCACGAG…
5306	4942	1	1	0	0	NC_001139	857273	857825	NC_001139	506715	506990	|gene note= GO_component: cytosol [goid 0005829] [evidence NAS] |neigh_up CDS[fcd=-1243](-,855269,856306) gene= RNR4 note= Rnr4p; |neigh_down CDS[fcd=743](+,858292,858609) gene= TIM13 note= Tim13p;	|gene gene= PRP18 |CDS(+,506074,506829) gene= PRP18 note= Prp18p; |gene gene= MUQ1 note= synonym: ECT1 |CDS(+,506973,507944) gene= MUQ1 note= Muq1p;	CGGTTCCCTTTCTTGCCTGAAATGCTCGTTCTAATGGAAAAAAAAAGAAATAAAGGTGGGCCTGCCCATTAGCAGGAAATTGGTACTTAATTATTGAAAAAAAAATTATTGGTTGCTAAGAGATTCGAACTCTTGCATCTTACGATACCTGAGTATTCCCACAGTTAACTGCGGTCAAGATATTTCTTGAATCAGGCGCCTTAGACCGCTCGGCCAAACAACCACTTATTTGTTGAAAGCGAGCGCGGTACAAGTAATGTTACCTCATCTGATATACAATAAAGGTGGAGCGCCAATATATACGCATTTGACTGTTCATAATTCATTGAATATAATTTATTCCTTGTTAGTACAAAAGGGTTAAACAGAAAAAGACGTGACGTTGTAACCGAGAGGATG…	CGGAATGCTGCTAACATAATGATTGATGAAAGAACGCGATTATGGATTACCAGTATTAAAAGATTAATAACTTTTGAAGAATGGTATACCAGCAACCACGATAGCTTAGCCTAATTGTTGAACTATTGTTTTCGTTATCGCGTGGCACGATATCATGCGGCCAAAATAAGAAGCAAGAATGCAGATGTTGATAGCCTTTGTTCAATTTTCCAGAGACAAATGCTTTACAGGATCGGGACTTGAAATATACTGACTGGATGACGGTAAACTTAGAT
5306	5172	7	7	0	0	NC_001139	857273	857825	NC_001139	742353	742833	|gene note= GO_component: cytosol [goid 0005829] [evidence NAS] |neigh_up CDS[fcd=-1243](-,855269,856306) gene= RNR4 note= Rnr4p; |neigh_down CDS[fcd=743](+,858292,858609) gene= TIM13 note= Tim13p;	|gene |CDS[fcd=-263](+,742330,745440) note= Ygr125wp;	CGGTTCCCTTTCTTGCCTGAAATGCTCGTTCTAATGGAAAAAAAAAGAAATAAAGGTGGGCCTGCCCATTAGCAGGAAATTGGTACTTAATTATTGAAAAAAAAATTATTGGTTGCTAAGAGATTCGAACTCTTGCATCTTACGATACCTGAGTATTCCCACAGTTAACTGCGGTCAAGATATTTCTTGAATCAGGCGCCTTAGACCGCTCGGCCAAACAACCACTTATTTGTTGAAAGCGAGCGCGGTACAAGTAATGTTACCTCATCTGATATACAATAAAGGTGGAGCGCCAATATATACGCATTTGACTGTTCATAATTCATTGAATATAATTTATTCCTTGTTAGTACAAAAGGGTTAAACAGAAAAAGACGTGACGTTGTAACCGAGAGGATG…	CGGAGTAATTCGTCGCTTTCGGAGGCCATATCAGTTTCTTTAGGAATAAATCAAGACTCATCTGTGAACAAGATGCATAGAGCGAGTGTTAGCGCAATGTCTCCTCCATTATGCCGTTCATACATGAGCGGATTTTTTACTGGTGGAAACTCACCTATGATCAATAATTTGTCGGATTCAAAACTTCCCATCTCGAACAAACAACATCCTAAAGTGATACATGGATCAGAAAATTTGCATAGGCAGACAGCTCAACTATCCAATGAATTTTGCTCCTCTTCTGTGGAAGAAAATTCTCCCACAATTAAGGATTACATGGACATTATAGGCAATGGTGATAGAAAAGATGATCAATCTATGCGTACTATAGAAGAGAATATTGATGAAGAATATTCAGAT…
5306	8088	1	1	0	0	NC_001139	857273	857825	NC_001143	457878	459179	|gene note= GO_component: cytosol [goid 0005829] [evidence NAS] |neigh_up CDS[fcd=-1243](-,855269,856306) gene= RNR4 note= Rnr4p; |neigh_down CDS[fcd=743](+,858292,858609) gene= TIM13 note= Tim13p;	|LTR note= YKRCDELTA8 |gene note= GO_component: cytosol [goid 0005829] [evidence NAS] |gene gene= TOF2 |CDS[fcd=2354](-,458567,460882) gene= TOF2 note= Tof2p;	CGGTTCCCTTTCTTGCCTGAAATGCTCGTTCTAATGGAAAAAAAAAGAAATAAAGGTGGGCCTGCCCATTAGCAGGAAATTGGTACTTAATTATTGAAAAAAAAATTATTGGTTGCTAAGAGATTCGAACTCTTGCATCTTACGATACCTGAGTATTCCCACAGTTAACTGCGGTCAAGATATTTCTTGAATCAGGCGCCTTAGACCGCTCGGCCAAACAACCACTTATTTGTTGAAAGCGAGCGCGGTACAAGTAATGTTACCTCATCTGATATACAATAAAGGTGGAGCGCCAATATATACGCATTTGACTGTTCATAATTCATTGAATATAATTTATTCCTTGTTAGTACAAAAGGGTTAAACAGAAAAAGACGTGACGTTGTAACCGAGAGGATG…	CGGTCTAGGAATCCCCAAAATGGAATCTATATTTCTACATACTAATATTACGATTATTCCTCATTCCGTTTTATATGTTTCATTATCCTATTACATTATCAATCCTTGCACTTCAGCTTCCTCTAACTTCGATGACAGCTTCTCATAACTTATGTCATCATCTTAACACCGTATATGATAATATATTGATAATATAACTATTAGTTGATAGACGATAGTGGATTTTTATTCCAACACATATAAAGTTTAGAAAGATGACATAAAGATTAACTTAATACATGACTGGGTATACTTGAATTCTAAAATTTTCAACAAATAAGTGGTTGTTTGGCCGAGCGGTCTAAGGCGCCTGATTCAAGAAATATCTTGACCGCAGTTAACTGTGGGAATACTCAGGTA…
5306	7150	10	10	0	0	NC_001139	857273	857825	NC_001142	380570	380923	|gene note= GO_component: cytosol [goid 0005829] [evidence NAS] |neigh_up CDS[fcd=-1243](-,855269,856306) gene= RNR4 note= Rnr4p; |neigh_down CDS[fcd=743](+,858292,858609) gene= TIM13 note= Tim13p;	|gene gene= TAD2 |CDS[fcd=250](-,380244,380996) gene= TAD2 note= Tad2p;	CGGTTCCCTTTCTTGCCTGAAATGCTCGTTCTAATGGAAAAAAAAAGAAATAAAGGTGGGCCTGCCCATTAGCAGGAAATTGGTACTTAATTATTGAAAAAAAAATTATTGGTTGCTAAGAGATTCGAACTCTTGCATCTTACGATACCTGAGTATTCCCACAGTTAACTGCGGTCAAGATATTTCTTGAATCAGGCGCCTTAGACCGCTCGGCCAAACAACCACTTATTTGTTGAAAGCGAGCGCGGTACAAGTAATGTTACCTCATCTGATATACAATAAAGGTGGAGCGCCAATATATACGCATTTGACTGTTCATAATTCATTGAATATAATTTATTCCTTGTTAGTACAAAAGGGTTAAACAGAAAAAGACGTGACGTTGTAACCGAGAGGATG…	CGGTATACTCTCGTACCCTGCCGCACTATTGTTCTTGGGCACTAATGTACACGTATCATGATTTACTGACAAGACAGTACCGTTGCCTCCAAATCTCTCGTTGCCACAACCGAACACCACCTTTCCAATGTCTAATTGCTTGAGAGCAGATGCACACATTATACACGGTTCTACAGTAACATATAGAGTAATGTCTTTGAACACGTCAACAACTCCTCGGGAGCCCAACATCGCCTTGATCTGATCGATCCCCATGAACTCAGCATGTGCTACTCCAGTTAATGACTTGTTCGTATCGTTCATGCCATAAGCCATCACCTGGCCAGTTGGCGTATGTACAAAGATGCAAGCTA
5306	3021	1	1	167	167	NC_001139	857273	857825	NC_001136	1251372	1251507	|gene note= GO_component: cytosol [goid 0005829] [evidence NAS] |neigh_up CDS[fcd=-1243](-,855269,856306) gene= RNR4 note= Rnr4p; |neigh_down CDS[fcd=743](+,858292,858609) gene= TIM13 note= Tim13p;	|gene gene= RVS167 |CDS[fcd=-1261](+,1250178,1251626) gene= RVS167 note= Rvs167p;	CGGTTCCCTTTCTTGCCTGAAATGCTCGTTCTAATGGAAAAAAAAAGAAATAAAGGTGGGCCTGCCCATTAGCAGGAAATTGGTACTTAATTATTGAAAAAAAAATTATTGGTTGCTAAGAGATTCGAACTCTTGCATCTTACGATACCTGAGTATTCCCACAGTTAACTGCGGTCAAGATATTTCTTGAATCAGGCGCCTTAGACCGCTCGGCCAAACAACCACTTATTTGTTGAAAGCGAGCGCGGTACAAGTAATGTTACCTCATCTGATATACAATAAAGGTGGAGCGCCAATATATACGCATTTGACTGTTCATAATTCATTGAATATAATTTATTCCTTGTTAGTACAAAAGGGTTAAACAGAAAAAGACGTGACGTTGTAACCGAGAGGATG…	CGGCCTACTCTAATCCTCTAACATCACCTGTTGCGGGCACACCAGCCGCGGCCGTAGCGGCAGCTCCTGGCGTTGAAACTGTTACCGCATTGTATGACTACCAAGCTCAAGCTGCTGGTGATTTGTCTTTCCCTG
5306	10065	89	89	2	2	NC_001139	857273	857825	NC_001145	408058	408128	|gene note= GO_component: cytosol [goid 0005829] [evidence NAS] |neigh_up CDS[fcd=-1243](-,855269,856306) gene= RNR4 note= Rnr4p; |neigh_down CDS[fcd=743](+,858292,858609) gene= TIM13 note= Tim13p;	|gene gene= NAT4 |CDS[fcd=-385](+,407708,408565) gene= NAT4 note= Nat4p;	CGGTTCCCTTTCTTGCCTGAAATGCTCGTTCTAATGGAAAAAAAAAGAAATAAAGGTGGGCCTGCCCATTAGCAGGAAATTGGTACTTAATTATTGAAAAAAAAATTATTGGTTGCTAAGAGATTCGAACTCTTGCATCTTACGATACCTGAGTATTCCCACAGTTAACTGCGGTCAAGATATTTCTTGAATCAGGCGCCTTAGACCGCTCGGCCAAACAACCACTTATTTGTTGAAAGCGAGCGCGGTACAAGTAATGTTACCTCATCTGATATACAATAAAGGTGGAGCGCCAATATATACGCATTTGACTGTTCATAATTCATTGAATATAATTTATTCCTTGTTAGTACAAAAGGGTTAAACAGAAAAAGACGTGACGTTGTAACCGAGAGGATG…	CGGGCCTCGCGCATTATGTACGGCAACAGGAAACCATGGAAGGCAAACAAACTCGCAGAGATGAAAAGCG
5306	1813	1	1	2	2	NC_001139	857273	857825	NC_001136	138839	138873	|gene note= GO_component: cytosol [goid 0005829] [evidence NAS] |neigh_up CDS[fcd=-1243](-,855269,856306) gene= RNR4 note= Rnr4p; |neigh_down CDS[fcd=743](+,858292,858609) gene= TIM13 note= Tim13p;	|gene gene= PCL9 |CDS[fcd=-564](+,138292,139206) gene= PCL9 note= Pcl9p;	CGGTTCCCTTTCTTGCCTGAAATGCTCGTTCTAATGGAAAAAAAAAGAAATAAAGGTGGGCCTGCCCATTAGCAGGAAATTGGTACTTAATTATTGAAAAAAAAATTATTGGTTGCTAAGAGATTCGAACTCTTGCATCTTACGATACCTGAGTATTCCCACAGTTAACTGCGGTCAAGATATTTCTTGAATCAGGCGCCTTAGACCGCTCGGCCAAACAACCACTTATTTGTTGAAAGCGAGCGCGGTACAAGTAATGTTACCTCATCTGATATACAATAAAGGTGGAGCGCCAATATATACGCATTTGACTGTTCATAATTCATTGAATATAATTTATTCCTTGTTAGTACAAAAGGGTTAAACAGAAAAAGACGTGACGTTGTAACCGAGAGGATG…	CGGCCAACTGAAAGAATATATAAATCATAGAAGA
5306	2774	4	4	0	0	NC_001139	857273	857825	NC_001136	1011789	1012160	|gene note= GO_component: cytosol [goid 0005829] [evidence NAS] |neigh_up CDS[fcd=-1243](-,855269,856306) gene= RNR4 note= Rnr4p; |neigh_down CDS[fcd=743](+,858292,858609) gene= TIM13 note= Tim13p;	|neigh_up CDS[fcd=-1802](+,1010172,1011269) gene= DON1 note= Don1p; |neigh_down CDS[fcd=274](+,1012248,1012955) gene= BSC2 note= Bsc2p;	CGGTTCCCTTTCTTGCCTGAAATGCTCGTTCTAATGGAAAAAAAAAGAAATAAAGGTGGGCCTGCCCATTAGCAGGAAATTGGTACTTAATTATTGAAAAAAAAATTATTGGTTGCTAAGAGATTCGAACTCTTGCATCTTACGATACCTGAGTATTCCCACAGTTAACTGCGGTCAAGATATTTCTTGAATCAGGCGCCTTAGACCGCTCGGCCAAACAACCACTTATTTGTTGAAAGCGAGCGCGGTACAAGTAATGTTACCTCATCTGATATACAATAAAGGTGGAGCGCCAATATATACGCATTTGACTGTTCATAATTCATTGAATATAATTTATTCCTTGTTAGTACAAAAGGGTTAAACAGAAAAAGACGTGACGTTGTAACCGAGAGGATG…	CGGGACAAATGCAAGTTAGATTCCTTGATTCCCGAATGCTCGGTCTTGCGTTTCGCCGTGGCTGCATGGAAGGTCATCGTACGGGTACGGGCAGTCTGGCTGAGTGGTGCCGCCAAAGTGCAATAGCTGTCAGTAGGGCGTGAGGAATGTAAAAGGCAAGAAAACATGTACGAGGGAAGAGAAGGGGGCAAAAGAAAGATAATAGGAACGGTGTAGATGAACTAGAAAAGGTTCAAGAGATGATAAACGTGAAGGGAGTGTCATATCTACCGACATAAAGATAGAGATCTTTTTTTTTCCTTTATTTTTTTTTTTGATTTTTTTTTTTGATTTTCTTGATATTAGTTTTTAGAAGTCCTTTGACGGGGCAG
5306	7298	28	28	9	9	NC_001139	857273	857825	NC_001142	542192	542360	|gene note= GO_component: cytosol [goid 0005829] [evidence NAS] |neigh_up CDS[fcd=-1243](-,855269,856306) gene= RNR4 note= Rnr4p; |neigh_down CDS[fcd=743](+,858292,858609) gene= TIM13 note= Tim13p;	|gene |CDS[fcd=219](-,541785,542495) note= Yjr056cp;	CGGTTCCCTTTCTTGCCTGAAATGCTCGTTCTAATGGAAAAAAAAAGAAATAAAGGTGGGCCTGCCCATTAGCAGGAAATTGGTACTTAATTATTGAAAAAAAAATTATTGGTTGCTAAGAGATTCGAACTCTTGCATCTTACGATACCTGAGTATTCCCACAGTTAACTGCGGTCAAGATATTTCTTGAATCAGGCGCCTTAGACCGCTCGGCCAAACAACCACTTATTTGTTGAAAGCGAGCGCGGTACAAGTAATGTTACCTCATCTGATATACAATAAAGGTGGAGCGCCAATATATACGCATTTGACTGTTCATAATTCATTGAATATAATTTATTCCTTGTTAGTACAAAAGGGTTAAACAGAAAAAGACGTGACGTTGTAACCGAGAGGATG…	CGGATTTAAAGATTTATCCTGCGAGTTTGAAAGGATATCATTTCTTCGTTTATAGCACCAAGCCCTTAACTCGTCAGCAGTCACATTTGAGTCCAATGCACATAGTATATCATCCAAACAGGTGAGGTAGCCCTGATGTTTGGTTAAAGAGTTTTTCTCATTAGCCAC
5306	843	2	3	0	0	NC_001139	857273	857825	NC_001134	452260	452322	|gene note= GO_component: cytosol [goid 0005829] [evidence NAS] |neigh_up CDS[fcd=-1243](-,855269,856306) gene= RNR4 note= Rnr4p; |neigh_down CDS[fcd=743](+,858292,858609) gene= TIM13 note= Tim13p;	|neigh_up CDS[fcd=-328](-,450875,451963) gene= VID24 note= Vid24p; |neigh_down CDS[fcd=361](+,452652,453218) gene= PHO88 note= Pho88p;	CGGTTCCCTTTCTTGCCTGAAATGCTCGTTCTAATGGAAAAAAAAAGAAATAAAGGTGGGCCTGCCCATTAGCAGGAAATTGGTACTTAATTATTGAAAAAAAAATTATTGGTTGCTAAGAGATTCGAACTCTTGCATCTTACGATACCTGAGTATTCCCACAGTTAACTGCGGTCAAGATATTTCTTGAATCAGGCGCCTTAGACCGCTCGGCCAAACAACCACTTATTTGTTGAAAGCGAGCGCGGTACAAGTAATGTTACCTCATCTGATATACAATAAAGGTGGAGCGCCAATATATACGCATTTGACTGTTCATAATTCATTGAATATAATTTATTCCTTGTTAGTACAAAAGGGTTAAACAGAAAAAGACGTGACGTTGTAACCGAGAGGATG…	CGGAAAAGAAAAAAAAAACGAAAATTAAAACCCGCCTGCCCCGCGGGGTGGGGGAGGGGTCA
5306	10673	20	20	0	0	NC_001139	857273	857825	NC_001146	19098	19447	|gene note= GO_component: cytosol [goid 0005829] [evidence NAS] |neigh_up CDS[fcd=-1243](-,855269,856306) gene= RNR4 note= Rnr4p; |neigh_down CDS[fcd=743](+,858292,858609) gene= TIM13 note= Tim13p;	|gene gene= RPD3 note= synonyms: MOF6, SDS6, SDI2, REC3 |CDS[fcd=30](-,18001,19302) gene= RPD3 note= Rpd3p;	CGGTTCCCTTTCTTGCCTGAAATGCTCGTTCTAATGGAAAAAAAAAGAAATAAAGGTGGGCCTGCCCATTAGCAGGAAATTGGTACTTAATTATTGAAAAAAAAATTATTGGTTGCTAAGAGATTCGAACTCTTGCATCTTACGATACCTGAGTATTCCCACAGTTAACTGCGGTCAAGATATTTCTTGAATCAGGCGCCTTAGACCGCTCGGCCAAACAACCACTTATTTGTTGAAAGCGAGCGCGGTACAAGTAATGTTACCTCATCTGATATACAATAAAGGTGGAGCGCCAATATATACGCATTTGACTGTTCATAATTCATTGAATATAATTTATTCCTTGTTAGTACAAAAGGGTTAAACAGAAAAAGACGTGACGTTGTAACCGAGAGGATG…	CGGCTTAGCTCTGTAAATTTCCATCTTCTTGTACAAGCCATAATTCATAATAAGGGAATGTGCCATTCTTATTCTATGCGGCTTCATCGGGTGACCTGCTCCATATGCATAGTTCCCAACGTCTGCATCGTAAAAATATGCAACGCGTCTTTTATCGCTTGGCTTGACCGTGATCGGATCAAAAGGTGTTGCTTCATATACCATCTGCACGGATATCGAGTTGTAGCCACGAATGTTTTGTATGGCGCAATTGTTTTATGAACCTTTATGGTTATTACTTCAAATTTTTATTATGTATAATCAACTACTAGTATCTTTTCTGTTTTTCCCTTTCGATAGATACTATGAG
5306	841	1	1	0	0	NC_001139	857273	857825	NC_001134	451432	452065	|gene note= GO_component: cytosol [goid 0005829] [evidence NAS] |neigh_up CDS[fcd=-1243](-,855269,856306) gene= RNR4 note= Rnr4p; |neigh_down CDS[fcd=743](+,858292,858609) gene= TIM13 note= Tim13p;	|gene gene= VID24 note= synonym: GID4 |CDS[fcd=215](-,450875,451963) gene= VID24 note= Vid24p;	CGGTTCCCTTTCTTGCCTGAAATGCTCGTTCTAATGGAAAAAAAAAGAAATAAAGGTGGGCCTGCCCATTAGCAGGAAATTGGTACTTAATTATTGAAAAAAAAATTATTGGTTGCTAAGAGATTCGAACTCTTGCATCTTACGATACCTGAGTATTCCCACAGTTAACTGCGGTCAAGATATTTCTTGAATCAGGCGCCTTAGACCGCTCGGCCAAACAACCACTTATTTGTTGAAAGCGAGCGCGGTACAAGTAATGTTACCTCATCTGATATACAATAAAGGTGGAGCGCCAATATATACGCATTTGACTGTTCATAATTCATTGAATATAATTTATTCCTTGTTAGTACAAAAGGGTTAAACAGAAAAAGACGTGACGTTGTAACCGAGAGGATG…	CGGGTGTTGGTTCGTGAGTCCTCTTATCGACAAAAATCCAGATAAATGAGGGGACAGCGACGTGCAATCTTTCTTTGGCAAATCTACAGTCTTTAAGTTAACTGTTACCTGATAGCGTTTGTATCCTGATATCTGGTACCCTGTAAACTGCATTCTTGGTCTTAAGTAGTTTGTGCAAACCGTATGGTTATAGGAAGAGGTCACAATGACTGGATTTTCCGAACTATAGGGAGATTGGTCCTCAACAATATATTTCTTCCTTGTCGACCCATTAGGTGTATGGGCGAGTTGCTGCAGGGAAGACAACGAATCCCTAGAAGCGCACTTGTAAAGATCTTGCTCTTGTAAGTAGCGATGACGGTCATGAAGATGAAAGGGTGCGGTTGAAGTCAAGTTGAA…
5306	11983	4	4	0	0	NC_001139	857273	857825	NC_001147	351987	352028	|gene note= GO_component: cytosol [goid 0005829] [evidence NAS] |neigh_up CDS[fcd=-1243](-,855269,856306) gene= RNR4 note= Rnr4p; |neigh_down CDS[fcd=743](+,858292,858609) gene= TIM13 note= Tim13p;	|gene gene= AUS1 |CDS[fcd=-2328](+,349679,353863) gene= AUS1 note= Aus1p;	CGGTTCCCTTTCTTGCCTGAAATGCTCGTTCTAATGGAAAAAAAAAGAAATAAAGGTGGGCCTGCCCATTAGCAGGAAATTGGTACTTAATTATTGAAAAAAAAATTATTGGTTGCTAAGAGATTCGAACTCTTGCATCTTACGATACCTGAGTATTCCCACAGTTAACTGCGGTCAAGATATTTCTTGAATCAGGCGCCTTAGACCGCTCGGCCAAACAACCACTTATTTGTTGAAAGCGAGCGCGGTACAAGTAATGTTACCTCATCTGATATACAATAAAGGTGGAGCGCCAATATATACGCATTTGACTGTTCATAATTCATTGAATATAATTTATTCCTTGTTAGTACAAAAGGGTTAAACAGAAAAAGACGTGACGTTGTAACCGAGAGGATG…	CGGTTTCATCAGTTCTGGTTTGACCGCCTTAATGGGTGAGT
5306	847	42	42	0	0	NC_001139	857273	857825	NC_001134	453088	453189	|gene note= GO_component: cytosol [goid 0005829] [evidence NAS] |neigh_up CDS[fcd=-1243](-,855269,856306) gene= RNR4 note= Rnr4p; |neigh_down CDS[fcd=743](+,858292,858609) gene= TIM13 note= Tim13p;	|gene gene= PHO88 |CDS[fcd=-486](+,452652,453218) gene= PHO88 note= Pho88p;	CGGTTCCCTTTCTTGCCTGAAATGCTCGTTCTAATGGAAAAAAAAAGAAATAAAGGTGGGCCTGCCCATTAGCAGGAAATTGGTACTTAATTATTGAAAAAAAAATTATTGGTTGCTAAGAGATTCGAACTCTTGCATCTTACGATACCTGAGTATTCCCACAGTTAACTGCGGTCAAGATATTTCTTGAATCAGGCGCCTTAGACCGCTCGGCCAAACAACCACTTATTTGTTGAAAGCGAGCGCGGTACAAGTAATGTTACCTCATCTGATATACAATAAAGGTGGAGCGCCAATATATACGCATTTGACTGTTCATAATTCATTGAATATAATTTATTCCTTGTTAGTACAAAAGGGTTAAACAGAAAAAGACGTGACGTTGTAACCGAGAGGATG…	CGGCGATTTGAAGAGACCATTCAAGGCTCCATCTTTGTTTGGTGGTATGGGTCAAACTGGTCCAAAGACCGACAAGAAATCTATCGAAGAAGCTGAAAGAG
5306	10164	2	2	0	0	NC_001139	857273	857825	NC_001145	496785	497375	|gene note= GO_component: cytosol [goid 0005829] [evidence NAS] |neigh_up CDS[fcd=-1243](-,855269,856306) gene= RNR4 note= Rnr4p; |neigh_down CDS[fcd=743](+,858292,858609) gene= TIM13 note= Tim13p;	|gene |CDS[fcd=368](-,496342,497448) note= Ymr114cp;	CGGTTCCCTTTCTTGCCTGAAATGCTCGTTCTAATGGAAAAAAAAAGAAATAAAGGTGGGCCTGCCCATTAGCAGGAAATTGGTACTTAATTATTGAAAAAAAAATTATTGGTTGCTAAGAGATTCGAACTCTTGCATCTTACGATACCTGAGTATTCCCACAGTTAACTGCGGTCAAGATATTTCTTGAATCAGGCGCCTTAGACCGCTCGGCCAAACAACCACTTATTTGTTGAAAGCGAGCGCGGTACAAGTAATGTTACCTCATCTGATATACAATAAAGGTGGAGCGCCAATATATACGCATTTGACTGTTCATAATTCATTGAATATAATTTATTCCTTGTTAGTACAAAAGGGTTAAACAGAAAAAGACGTGACGTTGTAACCGAGAGGATG…	CGGCTTCAGCAGCTTTACCAGTTCTTCAGTGCTCCATGTCGTTTTATCCACATCCATCCATGCATCCCAACTTTCGGTGCCTGGTTCCAGCACGCAAGGCATTCTTTCGTGGAGCCATTCTAACTCTCTGGGGCCTTGTGCAGTTATTATGGTGAACGTATATAAATCATCCTTTTCGACGTAATCATACATTCCTGCTACAAACATCAATCTGCCGTCTCGTCTAGAAATGAAATAAGGCGTCTTCTTTTTCCCTACGGTTTTCCATTCAAAATATCCGCTCATAAGCACAGCACACCTTTTCTTCTCACAGGGTCTCATCCACATTTTGCTCTCTTGTAAATTCTCTAAACGGGCATTAAAGGTACGATAGGTCTTGAATTGTGAAACGTCCTTGGT…
5306	8397	1	1	0	0	NC_001139	857273	857825	NC_001144	63854	64154	|gene note= GO_component: cytosol [goid 0005829] [evidence NAS] |neigh_up CDS[fcd=-1243](-,855269,856306) gene= RNR4 note= Rnr4p; |neigh_down CDS[fcd=743](+,858292,858609) gene= TIM13 note= Tim13p;	|gene gene= UBI4 note= synonyms: UB14, SCD2 |CDS[fcd=1202](-,64061,65206) gene= UBI4 note= Ubi4p;	CGGTTCCCTTTCTTGCCTGAAATGCTCGTTCTAATGGAAAAAAAAAGAAATAAAGGTGGGCCTGCCCATTAGCAGGAAATTGGTACTTAATTATTGAAAAAAAAATTATTGGTTGCTAAGAGATTCGAACTCTTGCATCTTACGATACCTGAGTATTCCCACAGTTAACTGCGGTCAAGATATTTCTTGAATCAGGCGCCTTAGACCGCTCGGCCAAACAACCACTTATTTGTTGAAAGCGAGCGCGGTACAAGTAATGTTACCTCATCTGATATACAATAAAGGTGGAGCGCCAATATATACGCATTTGACTGTTCATAATTCATTGAATATAATTTATTCCTTGTTAGTACAAAAGGGTTAAACAGAAAAAGACGTGACGTTGTAACCGAGAGGATG…	CGGCTTCGCGAAAATAGTGAACGTCATAGTATAAGACGATTCAAAAATCCAAGCTCTTGAAAACCAACATGAATAAAGACAATAACACAGTTGAACAATTTATTTAGTGTTCTATGGAGTATTTATCAAAAAAAAAAAAAAACCAAAAAGAAAAAAGGAGAGTAAACATATATATATTGACATAATGAAAATATTGCGAGGACTGATCAGTTACCACCCCTCAACCTCAAGACAAGGTGAAGAGTGGACTCCTTTTGAATATTGTAGTCCGACAGCGTTCTACCATCTTCTAGTTGCTTA
5306	13745	4	4	0	0	NC_001139	857273	857825	NC_001148	840413	840609	|gene note= GO_component: cytosol [goid 0005829] [evidence NAS] |neigh_up CDS[fcd=-1243](-,855269,856306) gene= RNR4 note= Rnr4p; |neigh_down CDS[fcd=743](+,858292,858609) gene= TIM13 note= Tim13p;	|neigh_up CDS[fcd=-738](-,837905,839773) gene= TPO3 note= Tpo3p; |neigh_down CDS[fcd=751](+,841262,842665) note= Ypr157wp;	CGGTTCCCTTTCTTGCCTGAAATGCTCGTTCTAATGGAAAAAAAAAGAAATAAAGGTGGGCCTGCCCATTAGCAGGAAATTGGTACTTAATTATTGAAAAAAAAATTATTGGTTGCTAAGAGATTCGAACTCTTGCATCTTACGATACCTGAGTATTCCCACAGTTAACTGCGGTCAAGATATTTCTTGAATCAGGCGCCTTAGACCGCTCGGCCAAACAACCACTTATTTGTTGAAAGCGAGCGCGGTACAAGTAATGTTACCTCATCTGATATACAATAAAGGTGGAGCGCCAATATATACGCATTTGACTGTTCATAATTCATTGAATATAATTTATTCCTTGTTAGTACAAAAGGGTTAAACAGAAAAAGACGTGACGTTGTAACCGAGAGGATG…	CGGCTAGTCCGATTGGGCTCCAGTAAACCCCTCGCCAAGCACAGAGAAGCTAGTCAGAGGCCCGCTAGACTGTACTTACTGGTCTTTAGCACACGACGACCGTACTTTGCACGTGGCTGCAGACACATTTTGTATGGAGGGAATGCTTGATTATATAAAGAGCTCTGTTTTTATGTTACCCGTCCAACGTTCTCAC
5306	2066	7	7	0	0	NC_001139	857273	857825	NC_001136	368868	368908	|gene note= GO_component: cytosol [goid 0005829] [evidence NAS] |neigh_up CDS[fcd=-1243](-,855269,856306) gene= RNR4 note= Rnr4p; |neigh_down CDS[fcd=743](+,858292,858609) gene= TIM13 note= Tim13p;	|neigh_up CDS[fcd=-677](-,366739,368211) gene= STP4 note= Stp4p; |neigh_down CDS[fcd=881](+,369769,370704) gene= SIT4 note= Sit4p;	CGGTTCCCTTTCTTGCCTGAAATGCTCGTTCTAATGGAAAAAAAAAGAAATAAAGGTGGGCCTGCCCATTAGCAGGAAATTGGTACTTAATTATTGAAAAAAAAATTATTGGTTGCTAAGAGATTCGAACTCTTGCATCTTACGATACCTGAGTATTCCCACAGTTAACTGCGGTCAAGATATTTCTTGAATCAGGCGCCTTAGACCGCTCGGCCAAACAACCACTTATTTGTTGAAAGCGAGCGCGGTACAAGTAATGTTACCTCATCTGATATACAATAAAGGTGGAGCGCCAATATATACGCATTTGACTGTTCATAATTCATTGAATATAATTTATTCCTTGTTAGTACAAAAGGGTTAAACAGAAAAAGACGTGACGTTGTAACCGAGAGGATG…	CGGATTTTATTTTCCTCAATGTGCTCGTGTAAGTGTCGGC
5306	9350	3	3	168	168	NC_001139	857273	857825	NC_001144	856710	856816	|gene note= GO_component: cytosol [goid 0005829] [evidence NAS] |neigh_up CDS[fcd=-1243](-,855269,856306) gene= RNR4 note= Rnr4p; |neigh_down CDS[fcd=743](+,858292,858609) gene= TIM13 note= Tim13p;	|gene gene= RPS22B gene= RPS22B note= Rps22bp; |misc_RNA |neigh_up CDS[fcd=-2702](+,854061,854390) note= Ylr364wp; |neigh_down CDS[fcd=776](+,857539,859335) gene= MDM30 note= Mdm30p;	CGGTTCCCTTTCTTGCCTGAAATGCTCGTTCTAATGGAAAAAAAAAGAAATAAAGGTGGGCCTGCCCATTAGCAGGAAATTGGTACTTAATTATTGAAAAAAAAATTATTGGTTGCTAAGAGATTCGAACTCTTGCATCTTACGATACCTGAGTATTCCCACAGTTAACTGCGGTCAAGATATTTCTTGAATCAGGCGCCTTAGACCGCTCGGCCAAACAACCACTTATTTGTTGAAAGCGAGCGCGGTACAAGTAATGTTACCTCATCTGATATACAATAAAGGTGGAGCGCCAATATATACGCATTTGACTGTTCATAATTCATTGAATATAATTTATTCCTTGTTAGTACAAAAGGGTTAAACAGAAAAAGACGTGACGTTGTAACCGAGAGGATG…	CGGGCTGATAACTAGATGGTGTGATCGGGCAGTATACTAATTTATACTGGACAAAGACTCGTAAAAGATGTTCTTTGTGCTTAGTCCCATACTGTTTTTTAAGTGT
5306	5830	1	1	0	0	NC_001139	857273	857825	NC_001140	204031	204145	|gene note= GO_component: cytosol [goid 0005829] [evidence NAS] |neigh_up CDS[fcd=-1243](-,855269,856306) gene= RNR4 note= Rnr4p; |neigh_down CDS[fcd=743](+,858292,858609) gene= TIM13 note= Tim13p;	|neigh_up CDS[fcd=-2785](-,198733,201303) gene= AAP1 note= Aap1p; |neigh_down CDS[fcd=512](+,204600,206144) gene= YHK8 note= Yhk8p;	CGGTTCCCTTTCTTGCCTGAAATGCTCGTTCTAATGGAAAAAAAAAGAAATAAAGGTGGGCCTGCCCATTAGCAGGAAATTGGTACTTAATTATTGAAAAAAAAATTATTGGTTGCTAAGAGATTCGAACTCTTGCATCTTACGATACCTGAGTATTCCCACAGTTAACTGCGGTCAAGATATTTCTTGAATCAGGCGCCTTAGACCGCTCGGCCAAACAACCACTTATTTGTTGAAAGCGAGCGCGGTACAAGTAATGTTACCTCATCTGATATACAATAAAGGTGGAGCGCCAATATATACGCATTTGACTGTTCATAATTCATTGAATATAATTTATTCCTTGTTAGTACAAAAGGGTTAAACAGAAAAAGACGTGACGTTGTAACCGAGAGGATG…	CGGAATAATGGTTCACTCATATTCTTCGTGTGAAACACAGAAGAAATCCAATATTTGCTTCAGTATTTATCTCTAAAAATTGGTCCTACATTGGAAACCATAAACCAATTATAA
5306	11109	9	9	0	0	NC_001139	857273	857825	NC_001146	367797	368051	|gene note= GO_component: cytosol [goid 0005829] [evidence NAS] |neigh_up CDS[fcd=-1243](-,855269,856306) gene= RNR4 note= Rnr4p; |neigh_down CDS[fcd=743](+,858292,858609) gene= TIM13 note= Tim13p;	|gene gene= SRV2 note= synonym: CAP |CDS[fcd=-1181](+,366743,368323) gene= SRV2 note= Srv2p;	CGGTTCCCTTTCTTGCCTGAAATGCTCGTTCTAATGGAAAAAAAAAGAAATAAAGGTGGGCCTGCCCATTAGCAGGAAATTGGTACTTAATTATTGAAAAAAAAATTATTGGTTGCTAAGAGATTCGAACTCTTGCATCTTACGATACCTGAGTATTCCCACAGTTAACTGCGGTCAAGATATTTCTTGAATCAGGCGCCTTAGACCGCTCGGCCAAACAACCACTTATTTGTTGAAAGCGAGCGCGGTACAAGTAATGTTACCTCATCTGATATACAATAAAGGTGGAGCGCCAATATATACGCATTTGACTGTTCATAATTCATTGAATATAATTTATTCCTTGTTAGTACAAAAGGGTTAAACAGAAAAAGACGTGACGTTGTAACCGAGAGGATG…	CGGTCCACCACCAAGGCCAAAAAAGCCATCAACATTGAAAACTAAGAGGCCTCCTAGAAAGGAATTGGTAGGAAACAAATGGTTTATTGAGAATTACGAAAATGAAACTGAATCTCTGGTTATTGATGCAAATAAAGATGAGTCTATCTTCATAGGTAAATGTTCTCAAGTTCTTGTTCAAATAAAAGGAAAAGTTAACGCTATCTCGTTGAGTGAAACTGAGTCATGCAGTGTTGTTCTTGATTCTAGCATTT
5306	12792	5	5	0	0	NC_001139	857273	857825	NC_001147	1052674	1053050	|gene note= GO_component: cytosol [goid 0005829] [evidence NAS] |neigh_up CDS[fcd=-1243](-,855269,856306) gene= RNR4 note= Rnr4p; |neigh_down CDS[fcd=743](+,858292,858609) gene= TIM13 note= Tim13p;	|gene gene= RDR1 |CDS[fcd=-1574](+,1051288,1052928) gene= RDR1 note= Rdr1p;	CGGTTCCCTTTCTTGCCTGAAATGCTCGTTCTAATGGAAAAAAAAAGAAATAAAGGTGGGCCTGCCCATTAGCAGGAAATTGGTACTTAATTATTGAAAAAAAAATTATTGGTTGCTAAGAGATTCGAACTCTTGCATCTTACGATACCTGAGTATTCCCACAGTTAACTGCGGTCAAGATATTTCTTGAATCAGGCGCCTTAGACCGCTCGGCCAAACAACCACTTATTTGTTGAAAGCGAGCGCGGTACAAGTAATGTTACCTCATCTGATATACAATAAAGGTGGAGCGCCAATATATACGCATTTGACTGTTCATAATTCATTGAATATAATTTATTCCTTGTTAGTACAAAAGGGTTAAACAGAAAAAGACGTGACGTTGTAACCGAGAGGATG…	CGGAAAGTCTTTCACATGTTGCTACTGCCATGAAAACGTTAGATAATATTACTCAAATTCTCGGTACACGTATTGCTTTTGAAGCACAAAAGACCGCAAAACTGCTTCTTGAGGATTCCATGAAAAAAAAAAGACAAGAAATTCAGCAGCTTGAGCAGGCAACTCACCAGAGATCTAATCTTGAAACTACTCACCTACTCGATATTGACTGGGATGCTTTGCTAGATCCATCAGACACGTTAAACTTTATGTAAAAGAGTATTATAGATTATGTGTATCGAGAAGCAAATTGATTTATAATTAGAGGGAATGGAATTGATGTTTAATACCTGCTTACTATATTTTATCTTTGATAATTGCGCAGAAAGTAATATAT
5306	679	5	5	0	0	NC_001139	857273	857825	NC_001134	315411	315438	|gene note= GO_component: cytosol [goid 0005829] [evidence NAS] |neigh_up CDS[fcd=-1243](-,855269,856306) gene= RNR4 note= Rnr4p; |neigh_down CDS[fcd=743](+,858292,858609) gene= TIM13 note= Tim13p;	|neigh_up CDS[fcd=-3527](+,311897,314788) gene= CHS2 note= Chs2p; |neigh_down CDS[fcd=151](+,315575,316510) gene= ATP3 note= Atp3p;	CGGTTCCCTTTCTTGCCTGAAATGCTCGTTCTAATGGAAAAAAAAAGAAATAAAGGTGGGCCTGCCCATTAGCAGGAAATTGGTACTTAATTATTGAAAAAAAAATTATTGGTTGCTAAGAGATTCGAACTCTTGCATCTTACGATACCTGAGTATTCCCACAGTTAACTGCGGTCAAGATATTTCTTGAATCAGGCGCCTTAGACCGCTCGGCCAAACAACCACTTATTTGTTGAAAGCGAGCGCGGTACAAGTAATGTTACCTCATCTGATATACAATAAAGGTGGAGCGCCAATATATACGCATTTGACTGTTCATAATTCATTGAATATAATTTATTCCTTGTTAGTACAAAAGGGTTAAACAGAAAAAGACGTGACGTTGTAACCGAGAGGATG…	CGGACCGCAATAACGATTAAAGAAGGC
5306	1228	1	1	0	0	NC_001139	857273	857825	NC_001134	786939	787475	|gene note= GO_component: cytosol [goid 0005829] [evidence NAS] |neigh_up CDS[fcd=-1243](-,855269,856306) gene= RNR4 note= Rnr4p; |neigh_down CDS[fcd=743](+,858292,858609) gene= TIM13 note= Tim13p;	|gene gene= VBA2 |CDS[fcd=-206](+,787001,788425) gene= VBA2 note= Vba2p;	CGGTTCCCTTTCTTGCCTGAAATGCTCGTTCTAATGGAAAAAAAAAGAAATAAAGGTGGGCCTGCCCATTAGCAGGAAATTGGTACTTAATTATTGAAAAAAAAATTATTGGTTGCTAAGAGATTCGAACTCTTGCATCTTACGATACCTGAGTATTCCCACAGTTAACTGCGGTCAAGATATTTCTTGAATCAGGCGCCTTAGACCGCTCGGCCAAACAACCACTTATTTGTTGAAAGCGAGCGCGGTACAAGTAATGTTACCTCATCTGATATACAATAAAGGTGGAGCGCCAATATATACGCATTTGACTGTTCATAATTCATTGAATATAATTTATTCCTTGTTAGTACAAAAGGGTTAAACAGAAAAAGACGTGACGTTGTAACCGAGAGGATG…	CGGTTTTGACGGAACCGTTACAGCTTCGACGTACCAAACGATTGGTAACGAATTTAATCAGATGAGTATTTCAAATTGGATCACCACTGCGTATTTAATTACATCAACATCTTTTCAACCTCTTTATGGGTCATTTTCTGATGCACTTGGTCGAAGAAACTGCCTTTTCTTTGCTAATGGGGCTTTTACCATTGGATGTCTAGCCTGTGGTTTCTCGAAAAACATCTACATGCTTAGTTTTATGAGAGCATTGACAGGCATAGGAGGTGGTGGCTTGATCACACTTTCTACAATCGTAAATTCAGACGTTATTCCAAGTTCGAAAAGAGGAATTTTTCAAGCGTTTCAGAATTTACTTTTGGGATTTGGTGCCATATGTGGAGCGTCTTTCGGTGGCAC…
5306	6440	2	2	0	0	NC_001139	857273	857825	NC_001141	176646	176836	|gene note= GO_component: cytosol [goid 0005829] [evidence NAS] |neigh_up CDS[fcd=-1243](-,855269,856306) gene= RNR4 note= Rnr4p; |neigh_down CDS[fcd=743](+,858292,858609) gene= TIM13 note= Tim13p;	|gene gene= XBP1 |CDS[fcd=506](-,175304,177247) gene= XBP1 note= Xbp1p;	CGGTTCCCTTTCTTGCCTGAAATGCTCGTTCTAATGGAAAAAAAAAGAAATAAAGGTGGGCCTGCCCATTAGCAGGAAATTGGTACTTAATTATTGAAAAAAAAATTATTGGTTGCTAAGAGATTCGAACTCTTGCATCTTACGATACCTGAGTATTCCCACAGTTAACTGCGGTCAAGATATTTCTTGAATCAGGCGCCTTAGACCGCTCGGCCAAACAACCACTTATTTGTTGAAAGCGAGCGCGGTACAAGTAATGTTACCTCATCTGATATACAATAAAGGTGGAGCGCCAATATATACGCATTTGACTGTTCATAATTCATTGAATATAATTTATTCCTTGTTAGTACAAAAGGGTTAAACAGAAAAAGACGTGACGTTGTAACCGAGAGGATG…	CGGAGTCATGCGACCATATTACGCAGTTGTTAGGGTTGATGAGCTTGTCATTGATCAGATTATGGTCCATTTTGGTCAACTTGAACTGCTGATTCTTTGTCAGCGAGGAGGTGGCATTTTCACGCGATGCTGTTGACAGAGCCTTCTTTTCTTGCTTGGTGGGTGATGCTGAGACTGGTGTTTTGTTAGA
5306	9207	3	3	0	0	NC_001139	857273	857825	NC_001144	732578	732796	|gene note= GO_component: cytosol [goid 0005829] [evidence NAS] |neigh_up CDS[fcd=-1243](-,855269,856306) gene= RNR4 note= Rnr4p; |neigh_down CDS[fcd=743](+,858292,858609) gene= TIM13 note= Tim13p;	|gene gene= MET17 note= synonyms: MET25, MET15 |CDS[fcd=-143](+,732544,733878) gene= MET17 note= Met17p;	CGGTTCCCTTTCTTGCCTGAAATGCTCGTTCTAATGGAAAAAAAAAGAAATAAAGGTGGGCCTGCCCATTAGCAGGAAATTGGTACTTAATTATTGAAAAAAAAATTATTGGTTGCTAAGAGATTCGAACTCTTGCATCTTACGATACCTGAGTATTCCCACAGTTAACTGCGGTCAAGATATTTCTTGAATCAGGCGCCTTAGACCGCTCGGCCAAACAACCACTTATTTGTTGAAAGCGAGCGCGGTACAAGTAATGTTACCTCATCTGATATACAATAAAGGTGGAGCGCCAATATATACGCATTTGACTGTTCATAATTCATTGAATATAATTTATTCCTTGTTAGTACAAAAGGGTTAAACAGAAAAAGACGTGACGTTGTAACCGAGAGGATG…	CGGCCAAGAGAACCCTGGTGACAATGCTCACAGATCCAGAGCTGTACCAATTTACGCCACCACTTCTTATGTTTTCGAAAACTCTAAGCATGGTTCGCAATTGTTTGGTCTAGAAGTTCCAGGTTACGTCTATTCCCGTTTCCAAAACCCAACCAGTAATGTTTTGGAAGAAAGAATTGCTGCTTTAGAAGGTGGTGCTGCTGCTTTGGCTGTTTCCT
5306	3960	1	1	0	0	NC_001139	857273	857825	NC_001137	515881	516180	|gene note= GO_component: cytosol [goid 0005829] [evidence NAS] |neigh_up CDS[fcd=-1243](-,855269,856306) gene= RNR4 note= Rnr4p; |neigh_down CDS[fcd=743](+,858292,858609) gene= TIM13 note= Tim13p;	|gene gene= DNF1 |CDS[fcd=-3291](+,512739,517454) gene= DNF1 note= Dnf1p;	CGGTTCCCTTTCTTGCCTGAAATGCTCGTTCTAATGGAAAAAAAAAGAAATAAAGGTGGGCCTGCCCATTAGCAGGAAATTGGTACTTAATTATTGAAAAAAAAATTATTGGTTGCTAAGAGATTCGAACTCTTGCATCTTACGATACCTGAGTATTCCCACAGTTAACTGCGGTCAAGATATTTCTTGAATCAGGCGCCTTAGACCGCTCGGCCAAACAACCACTTATTTGTTGAAAGCGAGCGCGGTACAAGTAATGTTACCTCATCTGATATACAATAAAGGTGGAGCGCCAATATATACGCATTTGACTGTTCATAATTCATTGAATATAATTTATTCCTTGTTAGTACAAAAGGGTTAAACAGAAAAAGACGTGACGTTGTAACCGAGAGGATG…	CGGTTCAGAAGAAGAGATTTTTGAAGCTAAAAAGGATCACGAATTTCCGAAGGGTAATTACGCCATCGTTATCGATGGTGATGCTTTGAAATTGGCGCTATATGGTGAAGATATAAGAAGAAAGTTTCTTTTACTCTGCAAGAATTGTAGAGCTGTCTTATGCTGTAGAGTATCTCCATCTCAAAAAGCAGCCGTTGTTAAGTTAGTCAAGGATTCTCTAGATGTCATGACACTAGCCATCGGCGATGGTTCCAACGACGTCGCCATGATTCAATCTGCGGATGTTGGTATTGGTATTG
5306	12540	1	1	0	0	NC_001139	857273	857825	NC_001147	831849	832184	|gene note= GO_component: cytosol [goid 0005829] [evidence NAS] |neigh_up CDS[fcd=-1243](-,855269,856306) gene= RNR4 note= Rnr4p; |neigh_down CDS[fcd=743](+,858292,858609) gene= TIM13 note= Tim13p;	|gene gene= FSF1 |CDS[fcd=25](-,831058,832041) gene= FSF1 note= Fsf1p;	CGGTTCCCTTTCTTGCCTGAAATGCTCGTTCTAATGGAAAAAAAAAGAAATAAAGGTGGGCCTGCCCATTAGCAGGAAATTGGTACTTAATTATTGAAAAAAAAATTATTGGTTGCTAAGAGATTCGAACTCTTGCATCTTACGATACCTGAGTATTCCCACAGTTAACTGCGGTCAAGATATTTCTTGAATCAGGCGCCTTAGACCGCTCGGCCAAACAACCACTTATTTGTTGAAAGCGAGCGCGGTACAAGTAATGTTACCTCATCTGATATACAATAAAGGTGGAGCGCCAATATATACGCATTTGACTGTTCATAATTCATTGAATATAATTTATTCCTTGTTAGTACAAAAGGGTTAAACAGAAAAAGACGTGACGTTGTAACCGAGAGGATG…	CGGAGTAGTCTCTTTTAGTTCACCGTGACGATACGCACTGATGATTTCTCTAGCATGCGCCAGGTCCTTCTCAGTAGTTAACAACATAGTGGGGTCGGAAATCTCTGCGCAATGGCGGATTCTACCCCAATACGTGGATAAGTCATAGCGGGATTCGGGCAAATCGATGGGCCCTGGGACTGATGATGCCATATTTCTCTGCCTTGTTTATTTTTTTCTTTCGATGCTGTGTGGTTTTATTATTGCTAACTTGCAGTGGTCGACGCCTTTGAAAACTGTAAAGCTGATGCGAAGACCTAACAGTCTCTTATCCAATTACCTCAATCTGGTACGCT
5306	11821	6	6	0	0	NC_001139	857273	857825	NC_001147	214931	215059	|gene note= GO_component: cytosol [goid 0005829] [evidence NAS] |neigh_up CDS[fcd=-1243](-,855269,856306) gene= RNR4 note= Rnr4p; |neigh_down CDS[fcd=743](+,858292,858609) gene= TIM13 note= Tim13p;	|gene gene= MAM3 |CDS[fcd=1142](-,214017,216137) gene= MAM3 note= Mam3p;	CGGTTCCCTTTCTTGCCTGAAATGCTCGTTCTAATGGAAAAAAAAAGAAATAAAGGTGGGCCTGCCCATTAGCAGGAAATTGGTACTTAATTATTGAAAAAAAAATTATTGGTTGCTAAGAGATTCGAACTCTTGCATCTTACGATACCTGAGTATTCCCACAGTTAACTGCGGTCAAGATATTTCTTGAATCAGGCGCCTTAGACCGCTCGGCCAAACAACCACTTATTTGTTGAAAGCGAGCGCGGTACAAGTAATGTTACCTCATCTGATATACAATAAAGGTGGAGCGCCAATATATACGCATTTGACTGTTCATAATTCATTGAATATAATTTATTCCTTGTTAGTACAAAAGGGTTAAACAGAAAAAGACGTGACGTTGTAACCGAGAGGATG…	CGGTTGTTGTCTCATAATATGCTGATGCATGTCCACAAAGACATCAGACTCGTCCACGATTTCTTCACCGATCAATTCTTCAATGACATCCTCCAAAGTTAAAACACCAATAGCGCCATGCGAGGAGC
5306	11273	2	2	1	1	NC_001139	857273	857825	NC_001146	502486	502878	|gene note= GO_component: cytosol [goid 0005829] [evidence NAS] |neigh_up CDS[fcd=-1243](-,855269,856306) gene= RNR4 note= Rnr4p; |neigh_down CDS[fcd=743](+,858292,858609) gene= TIM13 note= Tim13p;	|gene gene= SUN4 note= synonym: SCW3 |CDS[fcd=-1166](+,501516,502778) gene= SUN4 note= Sun4p;	CGGTTCCCTTTCTTGCCTGAAATGCTCGTTCTAATGGAAAAAAAAAGAAATAAAGGTGGGCCTGCCCATTAGCAGGAAATTGGTACTTAATTATTGAAAAAAAAATTATTGGTTGCTAAGAGATTCGAACTCTTGCATCTTACGATACCTGAGTATTCCCACAGTTAACTGCGGTCAAGATATTTCTTGAATCAGGCGCCTTAGACCGCTCGGCCAAACAACCACTTATTTGTTGAAAGCGAGCGCGGTACAAGTAATGTTACCTCATCTGATATACAATAAAGGTGGAGCGCCAATATATACGCATTTGACTGTTCATAATTCATTGAATATAATTTATTCCTTGTTAGTACAAAAGGGTTAAACAGAAAAAGACGTGACGTTGTAACCGAGAGGATG…	CGGTATTTCTGTCGAAGATGCTTGTGTTTGGGGTTCTTCAAGTTCAGGCGTCGGTAATTGGGCTCCATTGAACTTTGGCGCTGGTTCTTCTGATGGTGTCGCCTACCTTTCTTTGATTCCCAACCCAAACAACGGTAACGCATTGAATTTCAATGTCAAAATTGTCGCCGCTGATGACTCTTCTACAGTCAACGGTGAATGTATCTATGAAAACGGTAGCTTCAGCGGTGGCTCTGACGGTTGTACCGTTTCCGTTACTGCTGGCAAAGCTAAGTTTGTTCTATACAACTAAACTTAGGCGCATCAACAGTTGAGTAAGTTGATTGTATTATTACCCCATTCTTTTCTGCCCGTCCATTTTATTGTCTGTTTAACATACACTAAAACCCACG
5306	13263	1	1	0	0	NC_001139	857273	857825	NC_001148	401214	401522	|gene note= GO_component: cytosol [goid 0005829] [evidence NAS] |neigh_up CDS[fcd=-1243](-,855269,856306) gene= RNR4 note= Rnr4p; |neigh_down CDS[fcd=743](+,858292,858609) gene= TIM13 note= Tim13p;	|gene gene= MOT1 note= synonyms: LPF4, BUR3 |CDS[fcd=2712](-,398477,404080) gene= MOT1 note= Mot1p;	CGGTTCCCTTTCTTGCCTGAAATGCTCGTTCTAATGGAAAAAAAAAGAAATAAAGGTGGGCCTGCCCATTAGCAGGAAATTGGTACTTAATTATTGAAAAAAAAATTATTGGTTGCTAAGAGATTCGAACTCTTGCATCTTACGATACCTGAGTATTCCCACAGTTAACTGCGGTCAAGATATTTCTTGAATCAGGCGCCTTAGACCGCTCGGCCAAACAACCACTTATTTGTTGAAAGCGAGCGCGGTACAAGTAATGTTACCTCATCTGATATACAATAAAGGTGGAGCGCCAATATATACGCATTTGACTGTTCATAATTCATTGAATATAATTTATTCCTTGTTAGTACAAAAGGGTTAAACAGAAAAAGACGTGACGTTGTAACCGAGAGGATG…	CGGCCATCGTTTGTAACTTTTCATTCCTTTCTTCTTTAACACTGTCCATTAGCGACCTGATAATGGGGTTTAATTTAAGAGGTAGACCATCAAATAACAAGATGGATGATGCGTAATTAGCGAGAATGCTGCCTGTACGAAGTTTTGCGGATTCTTTGGCTGAATTGATTGCCATCAACACGCGATGCTTAGAATCTTCTAATGGCTTCTTGGCCAATAGTTTGTAAGAGTTGTTCATGGATTTGAACATTTTATCATAGTATTCGCCGTACACTTTTTCTGCTGTTTCAACACCAAACGCATGTGGA
5306	694	4	4	35	35	NC_001139	857273	857825	NC_001134	324425	324485	|gene note= GO_component: cytosol [goid 0005829] [evidence NAS] |neigh_up CDS[fcd=-1243](-,855269,856306) gene= RNR4 note= Rnr4p; |neigh_down CDS[fcd=743](+,858292,858609) gene= TIM13 note= Tim13p;	|gene gene= TCM62 |CDS[fcd=1603](-,324337,326058) gene= TCM62 note= Tcm62p;	CGGTTCCCTTTCTTGCCTGAAATGCTCGTTCTAATGGAAAAAAAAAGAAATAAAGGTGGGCCTGCCCATTAGCAGGAAATTGGTACTTAATTATTGAAAAAAAAATTATTGGTTGCTAAGAGATTCGAACTCTTGCATCTTACGATACCTGAGTATTCCCACAGTTAACTGCGGTCAAGATATTTCTTGAATCAGGCGCCTTAGACCGCTCGGCCAAACAACCACTTATTTGTTGAAAGCGAGCGCGGTACAAGTAATGTTACCTCATCTGATATACAATAAAGGTGGAGCGCCAATATATACGCATTTGACTGTTCATAATTCATTGAATATAATTTATTCCTTGTTAGTACAAAAGGGTTAAACAGAAAAAGACGTGACGTTGTAACCGAGAGGATG…	CGGCTAAACAAGAATCCATTTTGCTCCATGGCTCCAAGTTTCCATCCTTTACTGTGTTCA
5306	2607	10	10	0	0	NC_001139	857273	857825	NC_001136	847480	847560	|gene note= GO_component: cytosol [goid 0005829] [evidence NAS] |neigh_up CDS[fcd=-1243](-,855269,856306) gene= RNR4 note= Rnr4p; |neigh_down CDS[fcd=743](+,858292,858609) gene= TIM13 note= Tim13p;	|gene gene= MSS116 |CDS[fcd=423](-,845949,847943) gene= MSS116 note= Mss116p;	CGGTTCCCTTTCTTGCCTGAAATGCTCGTTCTAATGGAAAAAAAAAGAAATAAAGGTGGGCCTGCCCATTAGCAGGAAATTGGTACTTAATTATTGAAAAAAAAATTATTGGTTGCTAAGAGATTCGAACTCTTGCATCTTACGATACCTGAGTATTCCCACAGTTAACTGCGGTCAAGATATTTCTTGAATCAGGCGCCTTAGACCGCTCGGCCAAACAACCACTTATTTGTTGAAAGCGAGCGCGGTACAAGTAATGTTACCTCATCTGATATACAATAAAGGTGGAGCGCCAATATATACGCATTTGACTGTTCATAATTCATTGAATATAATTTATTCCTTGTTAGTACAAAAGGGTTAAACAGAAAAAGACGTGACGTTGTAACCGAGAGGATG…	CGGTTTTAGCTCTTGCGATAACATCATGGTCTTCACTGGATAATATTGGTTTGATAGTCTTTTGCTGTACAGGAGTTAAA
5306	12532	7	7	2	2	NC_001139	857273	857825	NC_001147	825870	826005	|gene note= GO_component: cytosol [goid 0005829] [evidence NAS] |neigh_up CDS[fcd=-1243](-,855269,856306) gene= RNR4 note= Rnr4p; |neigh_down CDS[fcd=743](+,858292,858609) gene= TIM13 note= Tim13p;	|gene |CDS[fcd=-6](-,825533,825931) note= Yor268cp;	CGGTTCCCTTTCTTGCCTGAAATGCTCGTTCTAATGGAAAAAAAAAGAAATAAAGGTGGGCCTGCCCATTAGCAGGAAATTGGTACTTAATTATTGAAAAAAAAATTATTGGTTGCTAAGAGATTCGAACTCTTGCATCTTACGATACCTGAGTATTCCCACAGTTAACTGCGGTCAAGATATTTCTTGAATCAGGCGCCTTAGACCGCTCGGCCAAACAACCACTTATTTGTTGAAAGCGAGCGCGGTACAAGTAATGTTACCTCATCTGATATACAATAAAGGTGGAGCGCCAATATATACGCATTTGACTGTTCATAATTCATTGAATATAATTTATTCCTTGTTAGTACAAAAGGGTTAAACAGAAAAAGACGTGACGTTGTAACCGAGAGGATG…	CGGCTTCTAGAAAACTGGAAAAACCATAAGAAAAAAATGGGAAGGGGAAAACAAAAACCATTCAGGTCTTGCGTGCCGAGAATTTTTTTTTTCTCTTTTTCGTTGTCAACTTTTGCAGTAGCAGCCGCTGGCGAC
5306	5853	565	565	451573	451573	NC_001139	857273	857825	NC_001140	219186	219621	|gene note= GO_component: cytosol [goid 0005829] [evidence NAS] |neigh_up CDS[fcd=-1243](-,855269,856306) gene= RNR4 note= Rnr4p; |neigh_down CDS[fcd=743](+,858292,858609) gene= TIM13 note= Tim13p;	|gene gene= MED6 |CDS[fcd=483](-,218999,219886) gene= MED6 note= Med6p;	CGGTTCCCTTTCTTGCCTGAAATGCTCGTTCTAATGGAAAAAAAAAGAAATAAAGGTGGGCCTGCCCATTAGCAGGAAATTGGTACTTAATTATTGAAAAAAAAATTATTGGTTGCTAAGAGATTCGAACTCTTGCATCTTACGATACCTGAGTATTCCCACAGTTAACTGCGGTCAAGATATTTCTTGAATCAGGCGCCTTAGACCGCTCGGCCAAACAACCACTTATTTGTTGAAAGCGAGCGCGGTACAAGTAATGTTACCTCATCTGATATACAATAAAGGTGGAGCGCCAATATATACGCATTTGACTGTTCATAATTCATTGAATATAATTTATTCCTTGTTAGTACAAAAGGGTTAAACAGAAAAAGACGTGACGTTGTAACCGAGAGGATG…	CGGTAGGTCGTACACTGCTCTTGTTACTGCCCCCTCCAGCGTTGTTCCCGTTGGTGGCAGCCGTTGCAGTCGTGCTAGTGTCCGTAGGTACTTTATAGTGTACTCCTTGGGAAGGTTGAAACTCAATCAAGTCATACAAGCTCTCCAATGTGCTATTTAGATGGTAGCTCGTGGACATCAGCCTACTTTGCACAATTTTAAAAATTGTTGGCGATTGGTAAATGTTTGCACCAATTATGTAGTAGTCTTGCAATGGAATAATCTCTGGTCCCTTAGCGCTTCCCACACCAGAATTGTTTGTTCGTCTTTGCTTCCTGATAACCCAGAAGTCAGGCTCTCTTACGCTGCTCAATACGTATTCAGTACCATCTAACTTCATTAATTCCTCCTCCAGTTGCA…
5306	11542	11	11	0	0	NC_001139	857273	857825	NC_001146	749543	749683	|gene note= GO_component: cytosol [goid 0005829] [evidence NAS] |neigh_up CDS[fcd=-1243](-,855269,856306) gene= RNR4 note= Rnr4p; |neigh_down CDS[fcd=743](+,858292,858609) gene= TIM13 note= Tim13p;	|gene |CDS[fcd=395](-,749136,750008) note= Ynr064cp;	CGGTTCCCTTTCTTGCCTGAAATGCTCGTTCTAATGGAAAAAAAAAGAAATAAAGGTGGGCCTGCCCATTAGCAGGAAATTGGTACTTAATTATTGAAAAAAAAATTATTGGTTGCTAAGAGATTCGAACTCTTGCATCTTACGATACCTGAGTATTCCCACAGTTAACTGCGGTCAAGATATTTCTTGAATCAGGCGCCTTAGACCGCTCGGCCAAACAACCACTTATTTGTTGAAAGCGAGCGCGGTACAAGTAATGTTACCTCATCTGATATACAATAAAGGTGGAGCGCCAATATATACGCATTTGACTGTTCATAATTCATTGAATATAATTTATTCCTTGTTAGTACAAAAGGGTTAAACAGAAAAAGACGTGACGTTGTAACCGAGAGGATG…	CGGATCACTTTGATATGACTTCCAATATTCCTTCAACGGACCCCAAAAGCGGTCATCGAGACCCTCTTCGTAAGCATTACCGTTTTGAGTAACAATGCCAGTAATTCTGGAGGGAAACTTCAAGGCTAACCGAAAACCTA
5306	9176	13	13	0	0	NC_001139	857273	857825	NC_001144	704702	704816	|gene note= GO_component: cytosol [goid 0005829] [evidence NAS] |neigh_up CDS[fcd=-1243](-,855269,856306) gene= RNR4 note= Rnr4p; |neigh_down CDS[fcd=743](+,858292,858609) gene= TIM13 note= Tim13p;	|gene |CDS[fcd=203](-,704495,704962) note= Ylr281cp;	CGGTTCCCTTTCTTGCCTGAAATGCTCGTTCTAATGGAAAAAAAAAGAAATAAAGGTGGGCCTGCCCATTAGCAGGAAATTGGTACTTAATTATTGAAAAAAAAATTATTGGTTGCTAAGAGATTCGAACTCTTGCATCTTACGATACCTGAGTATTCCCACAGTTAACTGCGGTCAAGATATTTCTTGAATCAGGCGCCTTAGACCGCTCGGCCAAACAACCACTTATTTGTTGAAAGCGAGCGCGGTACAAGTAATGTTACCTCATCTGATATACAATAAAGGTGGAGCGCCAATATATACGCATTTGACTGTTCATAATTCATTGAATATAATTTATTCCTTGTTAGTACAAAAGGGTTAAACAGAAAAAGACGTGACGTTGTAACCGAGAGGATG…	CGGGCAAGCTTTCGATTTTGCTCACGTGACCGCGTTTCTTGGCACTCGACAACGATCCCAGTGGGTTCATGCCGTAGTTGTACCTTAGAATTACACTTATTAATCTTTTGGCCA
5306	5316	216	216	4	4	NC_001139	857273	857825	NC_001139	877419	877535	|gene note= GO_component: cytosol [goid 0005829] [evidence NAS] |neigh_up CDS[fcd=-1243](-,855269,856306) gene= RNR4 note= Rnr4p; |neigh_down CDS[fcd=743](+,858292,858609) gene= TIM13 note= Tim13p;	|gene gene= CRH1 |CDS[fcd=720](-,876674,878197) gene= CRH1 note= Crh1p;	CGGTTCCCTTTCTTGCCTGAAATGCTCGTTCTAATGGAAAAAAAAAGAAATAAAGGTGGGCCTGCCCATTAGCAGGAAATTGGTACTTAATTATTGAAAAAAAAATTATTGGTTGCTAAGAGATTCGAACTCTTGCATCTTACGATACCTGAGTATTCCCACAGTTAACTGCGGTCAAGATATTTCTTGAATCAGGCGCCTTAGACCGCTCGGCCAAACAACCACTTATTTGTTGAAAGCGAGCGCGGTACAAGTAATGTTACCTCATCTGATATACAATAAAGGTGGAGCGCCAATATATACGCATTTGACTGTTCATAATTCATTGAATATAATTTATTCCTTGTTAGTACAAAAGGGTTAAACAGAAAAAGACGTGACGTTGTAACCGAGAGGATG…	CGGTAGAATAATCAGTTACAATGACCTTTTCAATGTACATAGTGAATGGAGCGTCATTGTAGTTGGTTTCACCACCAGCCCATTCAATGGTACCAGCAGCATTGTCTGGGTCACCA
5306	6711	1	1	0	0	NC_001139	857273	857825	NC_001141	404385	404432	|gene note= GO_component: cytosol [goid 0005829] [evidence NAS] |neigh_up CDS[fcd=-1243](-,855269,856306) gene= RNR4 note= Rnr4p; |neigh_down CDS[fcd=743](+,858292,858609) gene= TIM13 note= Tim13p;	|gene gene= MND2 |CDS[fcd=-752](+,403656,404762) gene= MND2 note= Mnd2p;	CGGTTCCCTTTCTTGCCTGAAATGCTCGTTCTAATGGAAAAAAAAAGAAATAAAGGTGGGCCTGCCCATTAGCAGGAAATTGGTACTTAATTATTGAAAAAAAAATTATTGGTTGCTAAGAGATTCGAACTCTTGCATCTTACGATACCTGAGTATTCCCACAGTTAACTGCGGTCAAGATATTTCTTGAATCAGGCGCCTTAGACCGCTCGGCCAAACAACCACTTATTTGTTGAAAGCGAGCGCGGTACAAGTAATGTTACCTCATCTGATATACAATAAAGGTGGAGCGCCAATATATACGCATTTGACTGTTCATAATTCATTGAATATAATTTATTCCTTGTTAGTACAAAAGGGTTAAACAGAAAAAGACGTGACGTTGTAACCGAGAGGATG…	CGGGGGAAGGTGTGGAAGGTATAGAAGTTCAGAGAGAGAGAATTGTG
5306	1525	14	14	0	0	NC_001139	857273	857825	NC_001135	223510	223606	|gene note= GO_component: cytosol [goid 0005829] [evidence NAS] |neigh_up CDS[fcd=-1243](-,855269,856306) gene= RNR4 note= Rnr4p; |neigh_down CDS[fcd=743](+,858292,858609) gene= TIM13 note= Tim13p;	|gene gene= YIH1 |CDS[fcd=668](-,223450,224226) gene= YIH1 note= Yih1p;	CGGTTCCCTTTCTTGCCTGAAATGCTCGTTCTAATGGAAAAAAAAAGAAATAAAGGTGGGCCTGCCCATTAGCAGGAAATTGGTACTTAATTATTGAAAAAAAAATTATTGGTTGCTAAGAGATTCGAACTCTTGCATCTTACGATACCTGAGTATTCCCACAGTTAACTGCGGTCAAGATATTTCTTGAATCAGGCGCCTTAGACCGCTCGGCCAAACAACCACTTATTTGTTGAAAGCGAGCGCGGTACAAGTAATGTTACCTCATCTGATATACAATAAAGGTGGAGCGCCAATATATACGCATTTGACTGTTCATAATTCATTGAATATAATTTATTCCTTGTTAGTACAAAAGGGTTAAACAGAAAAAGACGTGACGTTGTAACCGAGAGGATG…	CGGTCGGGACCTATGTGGGCACCGCCGAACCAACGGGCCACCACAACGATGACGTTCCACACATCCATGATGGTGATGAGGTGCAGCATTCTGGAG
5306	9177	14	14	0	0	NC_001139	857273	857825	NC_001144	704817	705082	|gene note= GO_component: cytosol [goid 0005829] [evidence NAS] |neigh_up CDS[fcd=-1243](-,855269,856306) gene= RNR4 note= Rnr4p; |neigh_down CDS[fcd=743](+,858292,858609) gene= TIM13 note= Tim13p;	|gene |CDS[fcd=13](-,704495,704962) note= Ylr281cp;	CGGTTCCCTTTCTTGCCTGAAATGCTCGTTCTAATGGAAAAAAAAAGAAATAAAGGTGGGCCTGCCCATTAGCAGGAAATTGGTACTTAATTATTGAAAAAAAAATTATTGGTTGCTAAGAGATTCGAACTCTTGCATCTTACGATACCTGAGTATTCCCACAGTTAACTGCGGTCAAGATATTTCTTGAATCAGGCGCCTTAGACCGCTCGGCCAAACAACCACTTATTTGTTGAAAGCGAGCGCGGTACAAGTAATGTTACCTCATCTGATATACAATAAAGGTGGAGCGCCAATATATACGCATTTGACTGTTCATAATTCATTGAATATAATTTATTCCTTGTTAGTACAAAAGGGTTAAACAGAAAAAGACGTGACGTTGTAACCGAGAGGATG…	CGGGCCCTCTGCCGCCATGAAGGAATTTCTCAGTGCATTGTGCTTCCATCTCTGGCGTGAACTTTGGTCGCGGTGGTAGCTTGTTCTTTTTAATCAGCAGCACTGCGGCACTGCTGATTGACCTCTTACTCGCTCCCCTCATCATAGTTTACTAGTCTCGGATTCTTCTGCGCTTTTTCCAGGGTCGCATAGCTTGTAGGTTGGTAGCATAGACTTATATATAAACTCATATCCGTTCTAGGAACGTATAGCGCGCTATGGTAGT
5306	5317	22	22	0	0	NC_001139	857273	857825	NC_001139	877536	877838	|gene note= GO_component: cytosol [goid 0005829] [evidence NAS] |neigh_up CDS[fcd=-1243](-,855269,856306) gene= RNR4 note= Rnr4p; |neigh_down CDS[fcd=743](+,858292,858609) gene= TIM13 note= Tim13p;	|gene gene= CRH1 |CDS[fcd=510](-,876674,878197) gene= CRH1 note= Crh1p;	CGGTTCCCTTTCTTGCCTGAAATGCTCGTTCTAATGGAAAAAAAAAGAAATAAAGGTGGGCCTGCCCATTAGCAGGAAATTGGTACTTAATTATTGAAAAAAAAATTATTGGTTGCTAAGAGATTCGAACTCTTGCATCTTACGATACCTGAGTATTCCCACAGTTAACTGCGGTCAAGATATTTCTTGAATCAGGCGCCTTAGACCGCTCGGCCAAACAACCACTTATTTGTTGAAAGCGAGCGCGGTACAAGTAATGTTACCTCATCTGATATACAATAAAGGTGGAGCGCCAATATATACGCATTTGACTGTTCATAATTCATTGAATATAATTTATTCCTTGTTAGTACAAAAGGGTTAAACAGAAAAAGACGTGACGTTGTAACCGAGAGGATG…	CGGCCCAGATACCCATCATTAGGTACATAGGAGATTGTGGGTAACCCTCACTTGATGTGTTTGATAATACTCTGACAGACTCTCCATCGAGGTACCAAGTCGTCTTGTCCATCGCCCAATCTAAAGTGTAGTTATGAAATTTGTCGGTAGGAGTGTCGACACCGTGAAATTCGCCTCTGTCGTATGTTGTGGTATCACCTTTAGAAAAGAAGTTAGATTGGAACTGAGTGTTGTCACCACCCACCCATTCAATATCAATTTCATCCAAATCATCACTTTGTAAATAGAATGATGAAACAATA
5306	1526	7	7	0	0	NC_001139	857273	857825	NC_001135	223607	223862	|gene note= GO_component: cytosol [goid 0005829] [evidence NAS] |neigh_up CDS[fcd=-1243](-,855269,856306) gene= RNR4 note= Rnr4p; |neigh_down CDS[fcd=743](+,858292,858609) gene= TIM13 note= Tim13p;	|gene gene= YIH1 |CDS[fcd=492](-,223450,224226) gene= YIH1 note= Yih1p;	CGGTTCCCTTTCTTGCCTGAAATGCTCGTTCTAATGGAAAAAAAAAGAAATAAAGGTGGGCCTGCCCATTAGCAGGAAATTGGTACTTAATTATTGAAAAAAAAATTATTGGTTGCTAAGAGATTCGAACTCTTGCATCTTACGATACCTGAGTATTCCCACAGTTAACTGCGGTCAAGATATTTCTTGAATCAGGCGCCTTAGACCGCTCGGCCAAACAACCACTTATTTGTTGAAAGCGAGCGCGGTACAAGTAATGTTACCTCATCTGATATACAATAAAGGTGGAGCGCCAATATATACGCATTTGACTGTTCATAATTCATTGAATATAATTTATTCCTTGTTAGTACAAAAGGGTTAAACAGAAAAAGACGTGACGTTGTAACCGAGAGGATG…	CGGCGGCCGTTTCACCGTCATCATCGGAATCTTGATATGTTGCCGCAGAGCCATCCTGCTTGATTCGCCATGCACTCATGACATGGTTTGCCTTACGCATCTTGGAGTCGGTCTTCAGTAGGTCTAGCATGGCAAACGCTTGTTCCTCGGAGGTAACATGTGCTGCAAAGGCCATGAAAGTCGAGCCTCTATCAGTAATGGGGTCCGACGCGGTCCAGCCCTCGAAGGGGTCTGTGGGAATGTCACTCTGCTGGA
5306	6130	4	4	0	0	NC_001139	857273	857825	NC_001140	487259	487620	|gene note= GO_component: cytosol [goid 0005829] [evidence NAS] |neigh_up CDS[fcd=-1243](-,855269,856306) gene= RNR4 note= Rnr4p; |neigh_down CDS[fcd=743](+,858292,858609) gene= TIM13 note= Tim13p;	|gene |CDS[fcd=-613](+,486826,487662) note= Yhr192wp;	CGGTTCCCTTTCTTGCCTGAAATGCTCGTTCTAATGGAAAAAAAAAGAAATAAAGGTGGGCCTGCCCATTAGCAGGAAATTGGTACTTAATTATTGAAAAAAAAATTATTGGTTGCTAAGAGATTCGAACTCTTGCATCTTACGATACCTGAGTATTCCCACAGTTAACTGCGGTCAAGATATTTCTTGAATCAGGCGCCTTAGACCGCTCGGCCAAACAACCACTTATTTGTTGAAAGCGAGCGCGGTACAAGTAATGTTACCTCATCTGATATACAATAAAGGTGGAGCGCCAATATATACGCATTTGACTGTTCATAATTCATTGAATATAATTTATTCCTTGTTAGTACAAAAGGGTTAAACAGAAAAAGACGTGACGTTGTAACCGAGAGGATG…	CGGTGAAGATCAAAACGACGATGCCATGGTACTTCTAGATGATGAATTAAATGCTAAATACCAAGAATTAAACAATCTAAAGACAGAGCTAGAAAAATTTAAGAAGGAAAGCCATGTAAAGGGCCTAAAGAAGGAAGACAGCGATGCATGGTTCGACAAAATCATCAGCGTACTGGCAGGCGGTAATGAATTGGACTCAACAAGTTCGCTCTCTCCCTTCAAAAAAATCATATGTCCACAGTGTCATTGGAAATCCAATTGCTACAGATTGGCCAGTAAGCCAATCATCTTTATCTGTCCTCACTGTAACCACAAAATAGACGAAGTAAAGGAAAGAGAAGACGCCATTGAAGCAAAACAA
5306	7807	2	2	0	0	NC_001139	857273	857825	NC_001143	230760	230851	|gene note= GO_component: cytosol [goid 0005829] [evidence NAS] |neigh_up CDS[fcd=-1243](-,855269,856306) gene= RNR4 note= Rnr4p; |neigh_down CDS[fcd=743](+,858292,858609) gene= TIM13 note= Tim13p;	|neigh_up CDS[fcd=-1281](-,228583,229524) gene= KTI12 note= Kti12p; |neigh_down CDS[fcd=1066](+,231871,233535) gene= HAP4 note= Hap4p;	CGGTTCCCTTTCTTGCCTGAAATGCTCGTTCTAATGGAAAAAAAAAGAAATAAAGGTGGGCCTGCCCATTAGCAGGAAATTGGTACTTAATTATTGAAAAAAAAATTATTGGTTGCTAAGAGATTCGAACTCTTGCATCTTACGATACCTGAGTATTCCCACAGTTAACTGCGGTCAAGATATTTCTTGAATCAGGCGCCTTAGACCGCTCGGCCAAACAACCACTTATTTGTTGAAAGCGAGCGCGGTACAAGTAATGTTACCTCATCTGATATACAATAAAGGTGGAGCGCCAATATATACGCATTTGACTGTTCATAATTCATTGAATATAATTTATTCCTTGTTAGTACAAAAGGGTTAAACAGAAAAAGACGTGACGTTGTAACCGAGAGGATG…	CGGAAACTGTAGGCAAAAACCGTTTATGTCTTTTTTTCACCTTACGGGATAACCTCTGCTGAGAATTTCCAAAACTAGGCATGGATGATTG
5306	918	1	1	0	0	NC_001139	857273	857825	NC_001134	518695	518881	|gene note= GO_component: cytosol [goid 0005829] [evidence NAS] |neigh_up CDS[fcd=-1243](-,855269,856306) gene= RNR4 note= Rnr4p; |neigh_down CDS[fcd=743](+,858292,858609) gene= TIM13 note= Tim13p;	|gene gene= IRA1 note= synonyms: PPD1, GLC1 |CDS[fcd=7834](-,517344,526622) gene= IRA1 note= Ira1p;	CGGTTCCCTTTCTTGCCTGAAATGCTCGTTCTAATGGAAAAAAAAAGAAATAAAGGTGGGCCTGCCCATTAGCAGGAAATTGGTACTTAATTATTGAAAAAAAAATTATTGGTTGCTAAGAGATTCGAACTCTTGCATCTTACGATACCTGAGTATTCCCACAGTTAACTGCGGTCAAGATATTTCTTGAATCAGGCGCCTTAGACCGCTCGGCCAAACAACCACTTATTTGTTGAAAGCGAGCGCGGTACAAGTAATGTTACCTCATCTGATATACAATAAAGGTGGAGCGCCAATATATACGCATTTGACTGTTCATAATTCATTGAATATAATTTATTCCTTGTTAGTACAAAAGGGTTAAACAGAAAAAGACGTGACGTTGTAACCGAGAGGATG…	CGGAGATAAAGTTCAACTTTTGACGTGCGAATGTTGCACAGACGATATCCAAATTTTTCCTATTCCTTTCAGGTAAGGACTCATTGTTGGTTAAAGAATGACAAACATTCATCAACAACTCGTACAATGAGACTCTTATTTCCGAAGGACCGACATCAATTAACAGAGACACAGCGAAAAGAATCT
5306	13723	3	3	0	0	NC_001139	857273	857825	NC_001148	822785	823143	|gene note= GO_component: cytosol [goid 0005829] [evidence NAS] |neigh_up CDS[fcd=-1243](-,855269,856306) gene= RNR4 note= Rnr4p; |neigh_down CDS[fcd=743](+,858292,858609) gene= TIM13 note= Tim13p;	|gene gene= ASN1 |CDS[fcd=-348](+,822616,824334) gene= ASN1 note= Asn1p;	CGGTTCCCTTTCTTGCCTGAAATGCTCGTTCTAATGGAAAAAAAAAGAAATAAAGGTGGGCCTGCCCATTAGCAGGAAATTGGTACTTAATTATTGAAAAAAAAATTATTGGTTGCTAAGAGATTCGAACTCTTGCATCTTACGATACCTGAGTATTCCCACAGTTAACTGCGGTCAAGATATTTCTTGAATCAGGCGCCTTAGACCGCTCGGCCAAACAACCACTTATTTGTTGAAAGCGAGCGCGGTACAAGTAATGTTACCTCATCTGATATACAATAAAGGTGGAGCGCCAATATATACGCATTTGACTGTTCATAATTCATTGAATATAATTTATTCCTTGTTAGTACAAAAGGGTTAAACAGAAAAAGACGTGACGTTGTAACCGAGAGGATG…	CGGTGCTCAACCAATTACTTCTTCAGACGGAGAGTACATGCTATGTGTTAACGGTGAAATCTACAACCACATTCAATTAAGAGAAGAATGCGCAGACTACGAGTTTGGAACACTGAGTGACTGTGAGCCTATCATCCCAATGTACTTAAAGCACGATATCGACGCTCCTAAGTACTTGGATGGTATGTTTGCTTGGACTCTTTACGACGCTAAACAAGATCGTATTGTGGCAGCCAGAGACCCAATCGGTATTACGACATTATATATGGGACGCTCTTCCGCTTCTCCAAAGACCGTTTATTTTGCATCCGAACTAAAATGTTTGACTGACGACTGTGACACTATCACTGCATTCCCA
5306	2104	2	2	0	0	NC_001139	857273	857825	NC_001136	394551	394760	|gene note= GO_component: cytosol [goid 0005829] [evidence NAS] |neigh_up CDS[fcd=-1243](-,855269,856306) gene= RNR4 note= Rnr4p; |neigh_down CDS[fcd=743](+,858292,858609) gene= TIM13 note= Tim13p;	|gene gene= DBP10 |CDS[fcd=-441](+,394214,397201) gene= DBP10 note= Dbp10p;	CGGTTCCCTTTCTTGCCTGAAATGCTCGTTCTAATGGAAAAAAAAAGAAATAAAGGTGGGCCTGCCCATTAGCAGGAAATTGGTACTTAATTATTGAAAAAAAAATTATTGGTTGCTAAGAGATTCGAACTCTTGCATCTTACGATACCTGAGTATTCCCACAGTTAACTGCGGTCAAGATATTTCTTGAATCAGGCGCCTTAGACCGCTCGGCCAAACAACCACTTATTTGTTGAAAGCGAGCGCGGTACAAGTAATGTTACCTCATCTGATATACAATAAAGGTGGAGCGCCAATATATACGCATTTGACTGTTCATAATTCATTGAATATAATTTATTCCTTGTTAGTACAAAAGGGTTAAACAGAAAAAGACGTGACGTTGTAACCGAGAGGATG…	CGGTGATGATGAGGATGATGTCAATGAATATTTCTCCACAAATAACTTGGAGAAAACAAAGCATAAAAAAGGTAGTTTTCCCAGCTTTGGCCTATCCAAAATTGTATTGAACAATATTAAAAGGAAGGGATTTCGCCAACCCACTCCTATTCAAAGGAAGACTATCCCATTAATTTTGCAAAGTAGGGATATTGTTGGTATGGCACGTA
5306	6141	9	9	23	23	NC_001139	857273	857825	NC_001140	494736	497057	|gene note= GO_component: cytosol [goid 0005829] [evidence NAS] |neigh_up CDS[fcd=-1243](-,855269,856306) gene= RNR4 note= Rnr4p; |neigh_down CDS[fcd=743](+,858292,858609) gene= TIM13 note= Tim13p;	|gene gene= RIX1 note= synonym: IPI2 |CDS(+,493896,496187) gene= RIX1 note= Rix1p; |gene gene= AIM18 |CDS(-,496315,497280) gene= AIM18 note= Aim18p;	CGGTTCCCTTTCTTGCCTGAAATGCTCGTTCTAATGGAAAAAAAAAGAAATAAAGGTGGGCCTGCCCATTAGCAGGAAATTGGTACTTAATTATTGAAAAAAAAATTATTGGTTGCTAAGAGATTCGAACTCTTGCATCTTACGATACCTGAGTATTCCCACAGTTAACTGCGGTCAAGATATTTCTTGAATCAGGCGCCTTAGACCGCTCGGCCAAACAACCACTTATTTGTTGAAAGCGAGCGCGGTACAAGTAATGTTACCTCATCTGATATACAATAAAGGTGGAGCGCCAATATATACGCATTTGACTGTTCATAATTCATTGAATATAATTTATTCCTTGTTAGTACAAAAGGGTTAAACAGAAAAAGACGTGACGTTGTAACCGAGAGGATG…	CGGTTATCGATGAATCCAATAACAAAGAAGAATTTTTACCCTCATTGAAATTAGACTTCAACGCACCTTTAACTTTATGGGAAATTCCACAACGTTTGTCCTTATTGGCTGACATGCTTGTTGCTTTCATCTCTTTACCAACTCCCTTTCCCATTCGAGTTCCGCTGGGTGGTATTAATTCCCTTTGTGAAGTTTTGTTGGGAGTTAGTAACAAATATTTACCGTTAAAAAAAGAATTGCGTCATGATAATGAACTAAATGGGGTCATCAATACCATCTTACCTCAAATACAATTTCAAGGCATTAGGTTATGGGAAATTATGGTTTCAAAATATGGCAAATGCGGTTTATCATTTTTCGAAGGAATCCTTTCTTCCATTGAACTTTTCATTCCATTAA…
5306	5321	15	15	0	0	NC_001139	857273	857825	NC_001139	880482	880784	|gene note= GO_component: cytosol [goid 0005829] [evidence NAS] |neigh_up CDS[fcd=-1243](-,855269,856306) gene= RNR4 note= Rnr4p; |neigh_down CDS[fcd=743](+,858292,858609) gene= TIM13 note= Tim13p;	|gene gene= HIP1 |CDS[fcd=-208](+,880425,882236) gene= HIP1 note= Hip1p;	CGGTTCCCTTTCTTGCCTGAAATGCTCGTTCTAATGGAAAAAAAAAGAAATAAAGGTGGGCCTGCCCATTAGCAGGAAATTGGTACTTAATTATTGAAAAAAAAATTATTGGTTGCTAAGAGATTCGAACTCTTGCATCTTACGATACCTGAGTATTCCCACAGTTAACTGCGGTCAAGATATTTCTTGAATCAGGCGCCTTAGACCGCTCGGCCAAACAACCACTTATTTGTTGAAAGCGAGCGCGGTACAAGTAATGTTACCTCATCTGATATACAATAAAGGTGGAGCGCCAATATATACGCATTTGACTGTTCATAATTCATTGAATATAATTTATTCCTTGTTAGTACAAAAGGGTTAAACAGAAAAAGACGTGACGTTGTAACCGAGAGGATG…	CGGCTACTTCTCCAGCCTTCGAGAATGAAAAAGAATCTACTACATTTGTTACCGAACTAACTTCCAAAACCGATTCTGCATTTCCATTAAGTAGCAAGGATTCACCTGGCATAAACCAAACCACAAACGATATTACCTCTTCAGATCGCTTCCGTCGTAATGAAGACACAGAGCAGGAAGACATCAACAACACCAACCTGAGTAAAGATCTATCCGTGAGACATCTTTTAACTCTAGCTGTCGGGGGTGCAATAGGTACTGGTTTATATGTGAATACGGGTGCTGCTTTATCTACAGGTGGT
5306	5322	1	1	0	0	NC_001139	857273	857825	NC_001139	880785	881310	|gene note= GO_component: cytosol [goid 0005829] [evidence NAS] |neigh_up CDS[fcd=-1243](-,855269,856306) gene= RNR4 note= Rnr4p; |neigh_down CDS[fcd=743](+,858292,858609) gene= TIM13 note= Tim13p;	|gene gene= HIP1 |CDS[fcd=-622](+,880425,882236) gene= HIP1 note= Hip1p;	CGGTTCCCTTTCTTGCCTGAAATGCTCGTTCTAATGGAAAAAAAAAGAAATAAAGGTGGGCCTGCCCATTAGCAGGAAATTGGTACTTAATTATTGAAAAAAAAATTATTGGTTGCTAAGAGATTCGAACTCTTGCATCTTACGATACCTGAGTATTCCCACAGTTAACTGCGGTCAAGATATTTCTTGAATCAGGCGCCTTAGACCGCTCGGCCAAACAACCACTTATTTGTTGAAAGCGAGCGCGGTACAAGTAATGTTACCTCATCTGATATACAATAAAGGTGGAGCGCCAATATATACGCATTTGACTGTTCATAATTCATTGAATATAATTTATTCCTTGTTAGTACAAAAGGGTTAAACAGAAAAAGACGTGACGTTGTAACCGAGAGGATG…	CGGCCAGTTTAGTTATTGATTGGGTTATTATCAGTACATGTCTTTTTACTGTGATTAACTCTCTTGGTGAGCTGTCCGCTGCTTTTCCCGTTGTTGGTGGGTTCAATGTTTACAGTATGCGTTTTATTGAGCCTTCATTTGCATTCGCAGTGAACTTAAACTATTTAGCACAATGGCTAGTTCTTCTACCCTTGGAATTAGTGGCCGCATCTATTACTATAAAATACTGGAATGATAAAATTAATTCCGACGCCTGGGTTGCTATCTTTTATGCCACCATTGCACTGGCTAATATGTTGGATGTTAAGTCATTTGGTGAGACCGAATTTGTATTGTCCATGATTAAAATCCTCTCCATCATTGGCTTTACTATCTTAGGTATTGTTTTGTCCTGTGGTG…
5306	7796	7	7	0	0	NC_001139	857273	857825	NC_001143	225856	225913	|gene note= GO_component: cytosol [goid 0005829] [evidence NAS] |neigh_up CDS[fcd=-1243](-,855269,856306) gene= RNR4 note= Rnr4p; |neigh_down CDS[fcd=743](+,858292,858609) gene= TIM13 note= Tim13p;	|neigh_up CDS[fcd=-365](-,224371,225519) gene= RAD27 note= Rad27p; |neigh_down CDS[fcd=330](+,226214,228409) gene= ABF1 note= Abf1p;	CGGTTCCCTTTCTTGCCTGAAATGCTCGTTCTAATGGAAAAAAAAAGAAATAAAGGTGGGCCTGCCCATTAGCAGGAAATTGGTACTTAATTATTGAAAAAAAAATTATTGGTTGCTAAGAGATTCGAACTCTTGCATCTTACGATACCTGAGTATTCCCACAGTTAACTGCGGTCAAGATATTTCTTGAATCAGGCGCCTTAGACCGCTCGGCCAAACAACCACTTATTTGTTGAAAGCGAGCGCGGTACAAGTAATGTTACCTCATCTGATATACAATAAAGGTGGAGCGCCAATATATACGCATTTGACTGTTCATAATTCATTGAATATAATTTATTCCTTGTTAGTACAAAAGGGTTAAACAGAAAAAGACGTGACGTTGTAACCGAGAGGATG…	CGGGTGCCCAATCGGGTATCTGTCACCGAAAGTCACTGTTAACGAGGTGTGATTCAG
5306	9638	1	1	0	0	NC_001139	857273	857825	NC_001145	26657	26967	|gene note= GO_component: cytosol [goid 0005829] [evidence NAS] |neigh_up CDS[fcd=-1243](-,855269,856306) gene= RNR4 note= Rnr4p; |neigh_down CDS[fcd=743](+,858292,858609) gene= TIM13 note= Tim13p;	|gene gene= GTR1 |CDS[fcd=118](+,26930,27862) gene= GTR1 note= Gtr1p;	CGGTTCCCTTTCTTGCCTGAAATGCTCGTTCTAATGGAAAAAAAAAGAAATAAAGGTGGGCCTGCCCATTAGCAGGAAATTGGTACTTAATTATTGAAAAAAAAATTATTGGTTGCTAAGAGATTCGAACTCTTGCATCTTACGATACCTGAGTATTCCCACAGTTAACTGCGGTCAAGATATTTCTTGAATCAGGCGCCTTAGACCGCTCGGCCAAACAACCACTTATTTGTTGAAAGCGAGCGCGGTACAAGTAATGTTACCTCATCTGATATACAATAAAGGTGGAGCGCCAATATATACGCATTTGACTGTTCATAATTCATTGAATATAATTTATTCCTTGTTAGTACAAAAGGGTTAAACAGAAAAAGACGTGACGTTGTAACCGAGAGGATG…	CGGGTAGTGATTTTTATCACGTGACACTTTTTTATTCCTTTTCTCTTTTCTTTTTTAAATTTTTTTTTTTTTTTTTCATTGATTAACCGCCTCTTCTTTATCACTCTCGCATTCTGTCTACTAAACGGTAAAAAAACGAAGTGAAAAGTTCAATGTGGGACCCTACCCTAAATTGTGATTATGGTAATAATTTCTTTTTGAATAAATACAATAGGTATCTTACACAGGAGTGAAGGCCATCAAAATCACGTTTATCAATCGACAATTTAGTAATGTCGTCAAATAATAGGAAGAAACTGCTTCTGATGGG
5306	12053	7	7	0	0	NC_001139	857273	857825	NC_001147	409204	409555	|gene note= GO_component: cytosol [goid 0005829] [evidence NAS] |neigh_up CDS[fcd=-1243](-,855269,856306) gene= RNR4 note= Rnr4p; |neigh_down CDS[fcd=743](+,858292,858609) gene= TIM13 note= Tim13p;	|gene gene= CUE5 |CDS[fcd=-954](+,408425,409660) gene= CUE5 note= Cue5p;	CGGTTCCCTTTCTTGCCTGAAATGCTCGTTCTAATGGAAAAAAAAAGAAATAAAGGTGGGCCTGCCCATTAGCAGGAAATTGGTACTTAATTATTGAAAAAAAAATTATTGGTTGCTAAGAGATTCGAACTCTTGCATCTTACGATACCTGAGTATTCCCACAGTTAACTGCGGTCAAGATATTTCTTGAATCAGGCGCCTTAGACCGCTCGGCCAAACAACCACTTATTTGTTGAAAGCGAGCGCGGTACAAGTAATGTTACCTCATCTGATATACAATAAAGGTGGAGCGCCAATATATACGCATTTGACTGTTCATAATTCATTGAATATAATTTATTCCTTGTTAGTACAAAAGGGTTAAACAGAAAAAGACGTGACGTTGTAACCGAGAGGATG…	CGGAGAAACTTTGCGTCAGGTAATGAGCAAAACGACAACCAACATGGTCACCAAGATCAGCAAGAATGGGAGCCAGAGATTGTGGATTTGTCACAAGGCGGGAAAAATTCAAGACCCCAGCAACCTGAGAGAAGAAGATTCAATTCGTTTGGCGTTCAAGTCGGTGATGACTCTTTAGAAAGCCACGGAATCACACTACACAACGAAGATGGATTTGAAGATGATGAAGATGTGCCACCTCAGTTACCAACGAGAACAAAATCTGGTGAGTCGACTGGAAAAGTAGTGGCAGAGACAACCTACATTGATACTCCAGATACAGAAACGAAGAAGAAATGGCAGCCGCTACCA
5306	2842	6	6	7	7	NC_001139	857273	857825	NC_001136	1071247	1073090	|gene note= GO_component: cytosol [goid 0005829] [evidence NAS] |neigh_up CDS[fcd=-1243](-,855269,856306) gene= RNR4 note= Rnr4p; |neigh_down CDS[fcd=743](+,858292,858609) gene= TIM13 note= Tim13p;	|gene gene= RSC3 |CDS(-,1068725,1071382) gene= RSC3 note= Rsc3p; |gene gene= CPR5 note= synonym: CYP5 |CDS(-,1071876,1072553) gene= CPR5 note= Cpr5p; |gene gene= HNT2 note= synonym: APH1 gene= HNT2 note= Hnt2p;	CGGTTCCCTTTCTTGCCTGAAATGCTCGTTCTAATGGAAAAAAAAAGAAATAAAGGTGGGCCTGCCCATTAGCAGGAAATTGGTACTTAATTATTGAAAAAAAAATTATTGGTTGCTAAGAGATTCGAACTCTTGCATCTTACGATACCTGAGTATTCCCACAGTTAACTGCGGTCAAGATATTTCTTGAATCAGGCGCCTTAGACCGCTCGGCCAAACAACCACTTATTTGTTGAAAGCGAGCGCGGTACAAGTAATGTTACCTCATCTGATATACAATAAAGGTGGAGCGCCAATATATACGCATTTGACTGTTCATAATTCATTGAATATAATTTATTCCTTGTTAGTACAAAAGGGTTAAACAGAAAAAGACGTGACGTTGTAACCGAGAGGATG…	CGGATAAAAGCAGTCCATTTTATTATGCTTCATACAGTTCCCACAAATCGGCTTAACACGATCGCAGCCTATCTTCCTCTTACGGCACTGCACGCATGCAGGCGGTTTTTTCATTTTTCTACCACGAATATCCATCGTTGTTTTTTGGTTCTGAAATGCTATTTTTGTAGATAAGAGCTTAAGAAAATATCACAGAAACCTCGATTTTAAATATCTGCGTAGTATGGGGCAATTGCAGCAGAGCACCAATGACTTTGGTTTGAAAGCCGTGAGTTTTGATGAAATAATCTAATGTAAGCAGCTAATATATCTTCTCGGGCGAAAACGGGAAAGTGGTCTTACAAGCGTCTAACGGGCCGAATGAATATTGGTGAACTATGGCTATTTGCGAGAAGGTAT…
5306	9415	3	3	0	0	NC_001139	857273	857825	NC_001144	914175	914696	|gene note= GO_component: cytosol [goid 0005829] [evidence NAS] |neigh_up CDS[fcd=-1243](-,855269,856306) gene= RNR4 note= Rnr4p; |neigh_down CDS[fcd=743](+,858292,858609) gene= TIM13 note= Tim13p;	|gene gene= AFG2 note= synonym: DRG1 |CDS[fcd=457](-,912550,914892) gene= AFG2 note= Afg2p;	CGGTTCCCTTTCTTGCCTGAAATGCTCGTTCTAATGGAAAAAAAAAGAAATAAAGGTGGGCCTGCCCATTAGCAGGAAATTGGTACTTAATTATTGAAAAAAAAATTATTGGTTGCTAAGAGATTCGAACTCTTGCATCTTACGATACCTGAGTATTCCCACAGTTAACTGCGGTCAAGATATTTCTTGAATCAGGCGCCTTAGACCGCTCGGCCAAACAACCACTTATTTGTTGAAAGCGAGCGCGGTACAAGTAATGTTACCTCATCTGATATACAATAAAGGTGGAGCGCCAATATATACGCATTTGACTGTTCATAATTCATTGAATATAATTTATTCCTTGTTAGTACAAAAGGGTTAAACAGAAAAAGACGTGACGTTGTAACCGAGAGGATG…	CGGAAGATTGTATTTACGATTTGCCTGGGTTTCTTTCGAAAAAGTTATATGTGTGGAGCCTTTTCTGAATATAAAAGGTGGAGATAGATAAAACAGGTTATCTAATCCACCGTACATATCGTCCATGTTAAGATCTAGTTGGCTGACGTCGGGAAGCGAATCATCGCTCGCATCTGTAATTACGACATCAATGCTTTCATCACCTGCTTTTGTTTTTAAGTTTTGAAAAATCATTCCAGGCATTATAACGCCACTATCATCCAGTAGCTTTTGAATTACTTTTTCCTCCATACATTCCAAAATATTATATCCTTGTAAGGACCCCACGGTAACCTTAGTGGCATAAGGTGGTTGCACCTGGGCTTTCTTTAATTCTAGACGATCACCAAGGATAAGGTT…
5306	5282	8	8	0	0	NC_001139	857273	857825	NC_001139	837415	837590	|gene note= GO_component: cytosol [goid 0005829] [evidence NAS] |neigh_up CDS[fcd=-1243](-,855269,856306) gene= RNR4 note= Rnr4p; |neigh_down CDS[fcd=743](+,858292,858609) gene= TIM13 note= Tim13p;	|gene gene= PSD2 |CDS[fcd=-355](+,837147,840563) gene= PSD2 note= Psd2p;	CGGTTCCCTTTCTTGCCTGAAATGCTCGTTCTAATGGAAAAAAAAAGAAATAAAGGTGGGCCTGCCCATTAGCAGGAAATTGGTACTTAATTATTGAAAAAAAAATTATTGGTTGCTAAGAGATTCGAACTCTTGCATCTTACGATACCTGAGTATTCCCACAGTTAACTGCGGTCAAGATATTTCTTGAATCAGGCGCCTTAGACCGCTCGGCCAAACAACCACTTATTTGTTGAAAGCGAGCGCGGTACAAGTAATGTTACCTCATCTGATATACAATAAAGGTGGAGCGCCAATATATACGCATTTGACTGTTCATAATTCATTGAATATAATTTATTCCTTGTTAGTACAAAAGGGTTAAACAGAAAAAGACGTGACGTTGTAACCGAGAGGATG…	CGGAGCTCCCCCTACTACCCCCAGTAGACCAAGGACAACCACTGCAAATACATCTTCATCGACACTGTCAAATTCAGGGCTAAGTTCTCACTCTCATTCGTCGAGAAATTTGAATGTTACGTCCAAAGGTAATCAAACTTCAACATCAATTAATTCAGTATCATCTTCAGCTACA
5306	8876	2	3	3	3	NC_001139	857273	857825	NC_001144	460025	460609	|gene note= GO_component: cytosol [goid 0005829] [evidence NAS] |neigh_up CDS[fcd=-1243](-,855269,856306) gene= RNR4 note= Rnr4p; |neigh_down CDS[fcd=743](+,858292,858609) gene= TIM13 note= Tim13p;	|rRNA |neigh_up CDS[fcd=-5620](+,454697,455071) gene= TAR1 note= Tar1p; |neigh_down CDS[fcd=2355](-,462523,462672) note= Ylr154c-gp;	CGGTTCCCTTTCTTGCCTGAAATGCTCGTTCTAATGGAAAAAAAAAGAAATAAAGGTGGGCCTGCCCATTAGCAGGAAATTGGTACTTAATTATTGAAAAAAAAATTATTGGTTGCTAAGAGATTCGAACTCTTGCATCTTACGATACCTGAGTATTCCCACAGTTAACTGCGGTCAAGATATTTCTTGAATCAGGCGCCTTAGACCGCTCGGCCAAACAACCACTTATTTGTTGAAAGCGAGCGCGGTACAAGTAATGTTACCTCATCTGATATACAATAAAGGTGGAGCGCCAATATATACGCATTTGACTGTTCATAATTCATTGAATATAATTTATTCCTTGTTAGTACAAAAGGGTTAAACAGAAAAAGACGTGACGTTGTAACCGAGAGGATG…	CGGTTTTGTTCTCTTCCCTCCATTTCCCTCTCTTCTACGGTTAATACTTTCCTCTTCGTCTTTTTCTACACCCTCGTTTAGTTGCTTCTTATTCCTTCCCGCTTTCCTGCACTAACATTTTGCCGCATTACACTATATGATCGTAGTACATCTTACAACTCCGCATACCGCGTCGCCGCGTCGCCGCGTCGCCAAAAATTTACTTCGCCAACCATTCCATATCTGTTAAGTATACATGTATATATTGCACTGGCTATTCATCTTGCACTTTTCCTCTTTCTTCTTCCCAGTAGCCTCATCCTTTTACGCTGCCTCTCTGGAACTTGCCATCATCATTCCCTAGAAACTGCCATTTACTTAAAAAAAAAAAAAAAAAAAAAATGTCCCCACTGTTCACTG…
5306	10227	44	44	2	2	NC_001139	857273	857825	NC_001145	545668	545834	|gene note= GO_component: cytosol [goid 0005829] [evidence NAS] |neigh_up CDS[fcd=-1243](-,855269,856306) gene= RNR4 note= Rnr4p; |neigh_down CDS[fcd=743](+,858292,858609) gene= TIM13 note= Tim13p;	|gene gene= CIN4 note= synonyms: UGX1, GTP1 |CDS[fcd=-597](+,545154,545729) gene= CIN4 note= Cin4p;	CGGTTCCCTTTCTTGCCTGAAATGCTCGTTCTAATGGAAAAAAAAAGAAATAAAGGTGGGCCTGCCCATTAGCAGGAAATTGGTACTTAATTATTGAAAAAAAAATTATTGGTTGCTAAGAGATTCGAACTCTTGCATCTTACGATACCTGAGTATTCCCACAGTTAACTGCGGTCAAGATATTTCTTGAATCAGGCGCCTTAGACCGCTCGGCCAAACAACCACTTATTTGTTGAAAGCGAGCGCGGTACAAGTAATGTTACCTCATCTGATATACAATAAAGGTGGAGCGCCAATATATACGCATTTGACTGTTCATAATTCATTGAATATAATTTATTCCTTGTTAGTACAAAAGGGTTAAACAGAAAAAGACGTGACGTTGTAACCGAGAGGATG…	CGGAGAAGGTATTGATAACCTGCGTGACCGTCTGGTGGAATCCTGCCATTTTACCCAATAATCGTCTAAGATGTGAGCACCATATAAAAACTTTAAATAATGTCAGTATTTATAGCGTGATAGTTCATTACCCGCCGACTGTGCGCATTCGTGGCTTCTGCTCACT
5306	746	3	3	0	0	NC_001139	857273	857825	NC_001134	370348	370461	|gene note= GO_component: cytosol [goid 0005829] [evidence NAS] |neigh_up CDS[fcd=-1243](-,855269,856306) gene= RNR4 note= Rnr4p; |neigh_down CDS[fcd=743](+,858292,858609) gene= TIM13 note= Tim13p;	|gene gene= NRG2 |CDS[fcd=293](-,370035,370697) gene= NRG2 note= Nrg2p;	CGGTTCCCTTTCTTGCCTGAAATGCTCGTTCTAATGGAAAAAAAAAGAAATAAAGGTGGGCCTGCCCATTAGCAGGAAATTGGTACTTAATTATTGAAAAAAAAATTATTGGTTGCTAAGAGATTCGAACTCTTGCATCTTACGATACCTGAGTATTCCCACAGTTAACTGCGGTCAAGATATTTCTTGAATCAGGCGCCTTAGACCGCTCGGCCAAACAACCACTTATTTGTTGAAAGCGAGCGCGGTACAAGTAATGTTACCTCATCTGATATACAATAAAGGTGGAGCGCCAATATATACGCATTTGACTGTTCATAATTCATTGAATATAATTTATTCCTTGTTAGTACAAAAGGGTTAAACAGAAAAAGACGTGACGTTGTAACCGAGAGGATG…	CGGTATTCTCTGCTTTTACAATATTAATATTTTGCAATGGCAGTATCGGTGACGTTTTTCCACTTGCTGTTAATCTTGAAATAGTCCCGTCACTCGTTCTGTTCGCTTGTTTT
5306	5283	2	2	0	0	NC_001139	857273	857825	NC_001139	837591	837633	|gene note= GO_component: cytosol [goid 0005829] [evidence NAS] |neigh_up CDS[fcd=-1243](-,855269,856306) gene= RNR4 note= Rnr4p; |neigh_down CDS[fcd=743](+,858292,858609) gene= TIM13 note= Tim13p;	|gene gene= PSD2 |CDS[fcd=-465](+,837147,840563) gene= PSD2 note= Psd2p;	CGGTTCCCTTTCTTGCCTGAAATGCTCGTTCTAATGGAAAAAAAAAGAAATAAAGGTGGGCCTGCCCATTAGCAGGAAATTGGTACTTAATTATTGAAAAAAAAATTATTGGTTGCTAAGAGATTCGAACTCTTGCATCTTACGATACCTGAGTATTCCCACAGTTAACTGCGGTCAAGATATTTCTTGAATCAGGCGCCTTAGACCGCTCGGCCAAACAACCACTTATTTGTTGAAAGCGAGCGCGGTACAAGTAATGTTACCTCATCTGATATACAATAAAGGTGGAGCGCCAATATATACGCATTTGACTGTTCATAATTCATTGAATATAATTTATTCCTTGTTAGTACAAAAGGGTTAAACAGAAAAAGACGTGACGTTGTAACCGAGAGGATG…	CGGCCCCTTCACATTCTTCCTCTTCTCTCTCAACAACAGGTC
5306	5281	2	2	0	0	NC_001139	857273	857825	NC_001139	837261	837414	|gene note= GO_component: cytosol [goid 0005829] [evidence NAS] |neigh_up CDS[fcd=-1243](-,855269,856306) gene= RNR4 note= Rnr4p; |neigh_down CDS[fcd=743](+,858292,858609) gene= TIM13 note= Tim13p;	|gene gene= PSD2 |CDS[fcd=-190](+,837147,840563) gene= PSD2 note= Psd2p;	CGGTTCCCTTTCTTGCCTGAAATGCTCGTTCTAATGGAAAAAAAAAGAAATAAAGGTGGGCCTGCCCATTAGCAGGAAATTGGTACTTAATTATTGAAAAAAAAATTATTGGTTGCTAAGAGATTCGAACTCTTGCATCTTACGATACCTGAGTATTCCCACAGTTAACTGCGGTCAAGATATTTCTTGAATCAGGCGCCTTAGACCGCTCGGCCAAACAACCACTTATTTGTTGAAAGCGAGCGCGGTACAAGTAATGTTACCTCATCTGATATACAATAAAGGTGGAGCGCCAATATATACGCATTTGACTGTTCATAATTCATTGAATATAATTTATTCCTTGTTAGTACAAAAGGGTTAAACAGAAAAAGACGTGACGTTGTAACCGAGAGGATG…	CGGTATGTTTTGTTACCACTAATACATTTTATAGTCAAAAGACGAACAAGCTCAAGAACTCAAATACACACTGGAATCAAACCTTGAGGATCAAACTTCCGAGAAATCCAACATCTGAATGGTTAAGGATTATAGTATACGACGCCCTACCAA
5306	2679	11	11	0	0	NC_001139	857273	857825	NC_001136	927887	928219	|gene note= GO_component: cytosol [goid 0005829] [evidence NAS] |neigh_up CDS[fcd=-1243](-,855269,856306) gene= RNR4 note= Rnr4p; |neigh_down CDS[fcd=743](+,858292,858609) gene= TIM13 note= Tim13p;	|gene gene= HEM1 note= synonym: CYD1 |CDS[fcd=-605](+,927448,929094) gene= HEM1 note= Hem1p;	CGGTTCCCTTTCTTGCCTGAAATGCTCGTTCTAATGGAAAAAAAAAGAAATAAAGGTGGGCCTGCCCATTAGCAGGAAATTGGTACTTAATTATTGAAAAAAAAATTATTGGTTGCTAAGAGATTCGAACTCTTGCATCTTACGATACCTGAGTATTCCCACAGTTAACTGCGGTCAAGATATTTCTTGAATCAGGCGCCTTAGACCGCTCGGCCAAACAACCACTTATTTGTTGAAAGCGAGCGCGGTACAAGTAATGTTACCTCATCTGATATACAATAAAGGTGGAGCGCCAATATATACGCATTTGACTGTTCATAATTCATTGAATATAATTTATTCCTTGTTAGTACAAAAGGGTTAAACAGAAAAAGACGTGACGTTGTAACCGAGAGGATG…	CGGTGGTACAAGAAACATTGCTGGCCATAACATCCCCACTTTGAATCTGGAAGCCGAATTGGCCACTTTACACAAGAAGGAAGGTGCCTTAGTTTTTTCGTCATGTTACGTAGCCAACGATGCCGTCTTATCCCTACTGGGTCAAAAGATGAAGGACTTGGTGATTTTCTCCGACGAACTCAACCATGCGTCCATGATTGTCGGTATTAAGCATGCTAACGTAAAAAAACACATTTTCAAACATAATGACTTGAACGAATTGGAACAACTGCTCCAGTCATACCCCAAATCCGTTCCTAAACTAATTGCTTTCGAATCAGTATATTCTATGG
5306	5287	1	1	0	0	NC_001139	857273	857825	NC_001139	839795	839939	|gene note= GO_component: cytosol [goid 0005829] [evidence NAS] |neigh_up CDS[fcd=-1243](-,855269,856306) gene= RNR4 note= Rnr4p; |neigh_down CDS[fcd=743](+,858292,858609) gene= TIM13 note= Tim13p;	|gene gene= PSD2 |CDS[fcd=-2720](+,837147,840563) gene= PSD2 note= Psd2p;	CGGTTCCCTTTCTTGCCTGAAATGCTCGTTCTAATGGAAAAAAAAAGAAATAAAGGTGGGCCTGCCCATTAGCAGGAAATTGGTACTTAATTATTGAAAAAAAAATTATTGGTTGCTAAGAGATTCGAACTCTTGCATCTTACGATACCTGAGTATTCCCACAGTTAACTGCGGTCAAGATATTTCTTGAATCAGGCGCCTTAGACCGCTCGGCCAAACAACCACTTATTTGTTGAAAGCGAGCGCGGTACAAGTAATGTTACCTCATCTGATATACAATAAAGGTGGAGCGCCAATATATACGCATTTGACTGTTCATAATTCATTGAATATAATTTATTCCTTGTTAGTACAAAAGGGTTAAACAGAAAAAGACGTGACGTTGTAACCGAGAGGATG…	CGGCTGCCTGAAAGTAATAATAAAGAAATATTGTTTTCACCAGCAGATTCAAGATGCACAGTGTTCCCAACTATACAAGAATCGAAGGAAATATGGGTGAAAGGAAGAAAATTTTCTATTAAGAAACTAGCCAATAACTATAAT
5306	3641	2	2	0	0	NC_001139	857273	857825	NC_001137	236631	236828	|gene note= GO_component: cytosol [goid 0005829] [evidence NAS] |neigh_up CDS[fcd=-1243](-,855269,856306) gene= RNR4 note= Rnr4p; |neigh_down CDS[fcd=743](+,858292,858609) gene= TIM13 note= Tim13p;	|gene gene= SAH1 |CDS[fcd=389](-,235769,237118) gene= SAH1 note= Sah1p;	CGGTTCCCTTTCTTGCCTGAAATGCTCGTTCTAATGGAAAAAAAAAGAAATAAAGGTGGGCCTGCCCATTAGCAGGAAATTGGTACTTAATTATTGAAAAAAAAATTATTGGTTGCTAAGAGATTCGAACTCTTGCATCTTACGATACCTGAGTATTCCCACAGTTAACTGCGGTCAAGATATTTCTTGAATCAGGCGCCTTAGACCGCTCGGCCAAACAACCACTTATTTGTTGAAAGCGAGCGCGGTACAAGTAATGTTACCTCATCTGATATACAATAAAGGTGGAGCGCCAATATATACGCATTTGACTGTTCATAATTCATTGAATATAATTTATTCCTTGTTAGTACAAAAGGGTTAAACAGAAAAAGACGTGACGTTGTAACCGAGAGGATG…	CGGTGGTAGTTTCTTCGGAAAGACCAAAGCAGTCTTCCAGCATTTCAGGGTGCTTTTCATGAACTAAAGTGGTTAAATCACCACCATCATCTAAGATCAAGTTCAATTTCTTGTTGTCCTTGAAGGCAAACAATTGTTGTTCAATACACCACAAATACTCTTCTTCAGTTTCACCCTTCCAGGCAAAAACTGGAACA
5306	5290	1	1	10	10	NC_001139	857273	857825	NC_001139	841913	845109	|gene note= GO_component: cytosol [goid 0005829] [evidence NAS] |neigh_up CDS[fcd=-1243](-,855269,856306) gene= RNR4 note= Rnr4p; |neigh_down CDS[fcd=743](+,858292,858609) gene= TIM13 note= Tim13p;	|gene gene= MSM1 |CDS(-,840829,842556) gene= MSM1 note= Msm1p; |gene gene= YIP1 |CDS(-,842850,843596) gene= YIP1 note= Yip1p; |gene gene= RBG2 note= synonym: GIR1 |CDS(+,843859,844965) gene= RBG2 note= Rbg2p;	CGGTTCCCTTTCTTGCCTGAAATGCTCGTTCTAATGGAAAAAAAAAGAAATAAAGGTGGGCCTGCCCATTAGCAGGAAATTGGTACTTAATTATTGAAAAAAAAATTATTGGTTGCTAAGAGATTCGAACTCTTGCATCTTACGATACCTGAGTATTCCCACAGTTAACTGCGGTCAAGATATTTCTTGAATCAGGCGCCTTAGACCGCTCGGCCAAACAACCACTTATTTGTTGAAAGCGAGCGCGGTACAAGTAATGTTACCTCATCTGATATACAATAAAGGTGGAGCGCCAATATATACGCATTTGACTGTTCATAATTCATTGAATATAATTTATTCCTTGTTAGTACAAAAGGGTTAAACAGAAAAAGACGTGACGTTGTAACCGAGAGGATG…	CGGTTTCTAGTTCTTTTAGAATTTGGTCTCTTTTAGAAGCAGGAAAAATGAAATCTGGATTCTTTCTTATATGGTCAACTATTTTCTTGTTAAATAAGGATAGCCTAAAGAAGTAATTTGTCTCTGACTGATAAACTACTTCGTTTTTCGATTCTGTATTCAGATACTTACCATCATTTTTGGGGTCTTTAATAACCTTGGATTCAGGATAGAATGTTTCATCAGAAATGGAATACCAACCCTTATGTTCGCCCATGTAAATATAGCCATTTTTCAAACAAAGTTCCCATAATTTCATCACGTTTTCAATGTGGTCAGGATCCGTAGTCCTTATAAATCTTGTATAATTAATGCCATATATTTTGTCTAATTGAACAAACTCTGGGTATAGCTTATCGA…
5306	5288	1	1	27	27	NC_001139	857273	857825	NC_001139	839940	840004	|gene note= GO_component: cytosol [goid 0005829] [evidence NAS] |neigh_up CDS[fcd=-1243](-,855269,856306) gene= RNR4 note= Rnr4p; |neigh_down CDS[fcd=743](+,858292,858609) gene= TIM13 note= Tim13p;	|gene gene= PSD2 |CDS[fcd=-2825](+,837147,840563) gene= PSD2 note= Psd2p;	CGGTTCCCTTTCTTGCCTGAAATGCTCGTTCTAATGGAAAAAAAAAGAAATAAAGGTGGGCCTGCCCATTAGCAGGAAATTGGTACTTAATTATTGAAAAAAAAATTATTGGTTGCTAAGAGATTCGAACTCTTGCATCTTACGATACCTGAGTATTCCCACAGTTAACTGCGGTCAAGATATTTCTTGAATCAGGCGCCTTAGACCGCTCGGCCAAACAACCACTTATTTGTTGAAAGCGAGCGCGGTACAAGTAATGTTACCTCATCTGATATACAATAAAGGTGGAGCGCCAATATATACGCATTTGACTGTTCATAATTCATTGAATATAATTTATTCCTTGTTAGTACAAAAGGGTTAAACAGAAAAAGACGTGACGTTGTAACCGAGAGGATG…	CGGAAACATTTAATGACAATAACTGCAGTATTGGTATATTTAGACTGGCGCCACAAGATTATCA
5306	5294	1	1	0	0	NC_001139	857273	857825	NC_001139	846441	846601	|gene note= GO_component: cytosol [goid 0005829] [evidence NAS] |neigh_up CDS[fcd=-1243](-,855269,856306) gene= RNR4 note= Rnr4p; |neigh_down CDS[fcd=743](+,858292,858609) gene= TIM13 note= Tim13p;	|neigh_up CDS[fcd=-111](-,845898,846410) gene= CBP4 note= Cbp4p; |neigh_down CDS[fcd=139](+,846660,846746) note= Ygr174w-ap;	CGGTTCCCTTTCTTGCCTGAAATGCTCGTTCTAATGGAAAAAAAAAGAAATAAAGGTGGGCCTGCCCATTAGCAGGAAATTGGTACTTAATTATTGAAAAAAAAATTATTGGTTGCTAAGAGATTCGAACTCTTGCATCTTACGATACCTGAGTATTCCCACAGTTAACTGCGGTCAAGATATTTCTTGAATCAGGCGCCTTAGACCGCTCGGCCAAACAACCACTTATTTGTTGAAAGCGAGCGCGGTACAAGTAATGTTACCTCATCTGATATACAATAAAGGTGGAGCGCCAATATATACGCATTTGACTGTTCATAATTCATTGAATATAATTTATTCCTTGTTAGTACAAAAGGGTTAAACAGAAAAAGACGTGACGTTGTAACCGAGAGGATG…	CGGGGGATGAGCAAAAAAAGGGATATGGGGAATGAAAAGTGAGATAAACTAGCAATAATCTATTCTAATAAGTAGAACATTCACAAAGACTACTATGGTGTAATTCTGAAAGGATTTACGAGAGCACAAATACTATTATGTATAATTCTGACTGCAGAAT
5306	3632	3	3	0	0	NC_001139	857273	857825	NC_001137	228675	228933	|gene note= GO_component: cytosol [goid 0005829] [evidence NAS] |neigh_up CDS[fcd=-1243](-,855269,856306) gene= RNR4 note= Rnr4p; |neigh_down CDS[fcd=743](+,858292,858609) gene= TIM13 note= Tim13p;	|gene gene= HVG1 note= synonym: YEM9 |CDS[fcd=400](-,228455,229204) gene= HVG1 note= Hvg1p;	CGGTTCCCTTTCTTGCCTGAAATGCTCGTTCTAATGGAAAAAAAAAGAAATAAAGGTGGGCCTGCCCATTAGCAGGAAATTGGTACTTAATTATTGAAAAAAAAATTATTGGTTGCTAAGAGATTCGAACTCTTGCATCTTACGATACCTGAGTATTCCCACAGTTAACTGCGGTCAAGATATTTCTTGAATCAGGCGCCTTAGACCGCTCGGCCAAACAACCACTTATTTGTTGAAAGCGAGCGCGGTACAAGTAATGTTACCTCATCTGATATACAATAAAGGTGGAGCGCCAATATATACGCATTTGACTGTTCATAATTCATTGAATATAATTTATTCCTTGTTAGTACAAAAGGGTTAAACAGAAAAAGACGTGACGTTGTAACCGAGAGGATG…	CGGAACAGTACGATATCCCCACGGACATGAGCCCACTGATGACCATTGCTGCCAGTGAGTCGGCGGACAAGTTCACAGACAAATTCTTTGTGGACCAATCTTCCATAATGAAGGAAAAGACTAGCAGCAAAGGCAATGCCAGAACGTTGTTATAAAACATAGTATCATAGTCTTTAAAGTTAGTCAGCCGAATTCTCTTCCGCATAATCAAAACGAACAATGCAGACGAAATACAATTGGTGAACATCCAGAGGTACC
5306	5299	9	9	0	0	NC_001139	857273	857825	NC_001139	852994	853596	|gene note= GO_component: cytosol [goid 0005829] [evidence NAS] |neigh_up CDS[fcd=-1243](-,855269,856306) gene= RNR4 note= Rnr4p; |neigh_down CDS[fcd=743](+,858292,858609) gene= TIM13 note= Tim13p;	|gene gene= PBP1 note= synonym: MRS16 |CDS[fcd=-75](-,851052,853220) gene= PBP1 note= Pbp1p;	CGGTTCCCTTTCTTGCCTGAAATGCTCGTTCTAATGGAAAAAAAAAGAAATAAAGGTGGGCCTGCCCATTAGCAGGAAATTGGTACTTAATTATTGAAAAAAAAATTATTGGTTGCTAAGAGATTCGAACTCTTGCATCTTACGATACCTGAGTATTCCCACAGTTAACTGCGGTCAAGATATTTCTTGAATCAGGCGCCTTAGACCGCTCGGCCAAACAACCACTTATTTGTTGAAAGCGAGCGCGGTACAAGTAATGTTACCTCATCTGATATACAATAAAGGTGGAGCGCCAATATATACGCATTTGACTGTTCATAATTCATTGAATATAATTTATTCCTTGTTAGTACAAAAGGGTTAAACAGAAAAAGACGTGACGTTGTAACCGAGAGGATG…	CGGTATATTTCACACCTGAAGTAACAGTTACTGTTACATCAGAGCCTATACTATTGGCTAACAAATAATCTTGACGGTCATCAAAGTTTCTCGTAATTTCAGGGTTCTCATAGAACATTGAACTGTTGTTTTGATTAGGGACGCCTCCATTCGTATAATTGCTGTCAGAATTACCACCCTTTCTTGAGTTGGTGGAGCTATCTCTTTTCCTAAAGTTTCCCTTCATATTGTTTCAATGTAATGAACTCCTTTAATTACTTCCGTGACTGAGGATGTCAGTTTTTATATCAAATCAATTTTCAAAGATTTAATTATTGCTTCCCCTTCAAGATCAATTCGGAAATAATCGAAACGTCTTCTGGAAAGAACAAAAAGAAAGATAGAAGAAAACGCGAGTGA…
5306	7692	3	3	0	0	NC_001139	857273	857825	NC_001143	132455	132605	|gene note= GO_component: cytosol [goid 0005829] [evidence NAS] |neigh_up CDS[fcd=-1243](-,855269,856306) gene= RNR4 note= Rnr4p; |neigh_down CDS[fcd=743](+,858292,858609) gene= TIM13 note= Tim13p;	|gene gene= KKQ8 |CDS[fcd=937](-,131293,133467) gene= KKQ8 note= Kkq8p;	CGGTTCCCTTTCTTGCCTGAAATGCTCGTTCTAATGGAAAAAAAAAGAAATAAAGGTGGGCCTGCCCATTAGCAGGAAATTGGTACTTAATTATTGAAAAAAAAATTATTGGTTGCTAAGAGATTCGAACTCTTGCATCTTACGATACCTGAGTATTCCCACAGTTAACTGCGGTCAAGATATTTCTTGAATCAGGCGCCTTAGACCGCTCGGCCAAACAACCACTTATTTGTTGAAAGCGAGCGCGGTACAAGTAATGTTACCTCATCTGATATACAATAAAGGTGGAGCGCCAATATATACGCATTTGACTGTTCATAATTCATTGAATATAATTTATTCCTTGTTAGTACAAAAGGGTTAAACAGAAAAAGACGTGACGTTGTAACCGAGAGGATG…	CGGTTCTTTTCTCATGGTTTGTCTGAGATTTTTCTACGTTTGGCAGAAGAGATAAAGCGTTTTCAATATCGCATTCATTTTTATGATGTTTGAATAGACCAGAAAGAGTAATACCTAATCTTGGTCTAGATAATGATCCCTGTCGATGTG
5306	5298	4	4	0	0	NC_001139	857273	857825	NC_001139	852415	852993	|gene note= GO_component: cytosol [goid 0005829] [evidence NAS] |neigh_up CDS[fcd=-1243](-,855269,856306) gene= RNR4 note= Rnr4p; |neigh_down CDS[fcd=743](+,858292,858609) gene= TIM13 note= Tim13p;	|gene gene= PBP1 note= synonym: MRS16 |CDS[fcd=516](-,851052,853220) gene= PBP1 note= Pbp1p;	CGGTTCCCTTTCTTGCCTGAAATGCTCGTTCTAATGGAAAAAAAAAGAAATAAAGGTGGGCCTGCCCATTAGCAGGAAATTGGTACTTAATTATTGAAAAAAAAATTATTGGTTGCTAAGAGATTCGAACTCTTGCATCTTACGATACCTGAGTATTCCCACAGTTAACTGCGGTCAAGATATTTCTTGAATCAGGCGCCTTAGACCGCTCGGCCAAACAACCACTTATTTGTTGAAAGCGAGCGCGGTACAAGTAATGTTACCTCATCTGATATACAATAAAGGTGGAGCGCCAATATATACGCATTTGACTGTTCATAATTCATTGAATATAATTTATTCCTTGTTAGTACAAAAGGGTTAAACAGAAAAAGACGTGACGTTGTAACCGAGAGGATG…	CGGAAGTTCCTTGCGATTCAATTTCCTTAGCGATTCTTTCGGCTTCTTGCAACCTCTTACTGTAATTAGGGTCATCCTTGTTAATCTTTGTTGTATACAAATGTTCATCAAAAGTTGACTTTACGCCAAACTTTTTCTCGTTCACAGCAAATTGATCCCAACTGGCAGAATCGTCTTCCAAAGCTTTACCCTTGTTGATATCAAAATGTTCCGCGCCTTCTTCGGGTGTCCATTTTTCTAACTTACGCTCCTTAATTTCTCTACCAGAACCAGAAATATCAACATCAGTCCTGAATTTCGTAACTTCATTCGATTCTCCATTTACCCTTTCCTTTTCAATATTTGTTCTGGCGGGCGTTGTTTCTTGGGCTTTGGAATTTTCCCATTTCTCATCAAGAG…
5306	7484	26	26	0	0	NC_001139	857273	857825	NC_001142	698888	699125	|gene note= GO_component: cytosol [goid 0005829] [evidence NAS] |neigh_up CDS[fcd=-1243](-,855269,856306) gene= RNR4 note= Rnr4p; |neigh_down CDS[fcd=743](+,858292,858609) gene= TIM13 note= Tim13p;	|gene gene= PMT4 |CDS[fcd=1602](-,698320,700608) gene= PMT4 note= Pmt4p;	CGGTTCCCTTTCTTGCCTGAAATGCTCGTTCTAATGGAAAAAAAAAGAAATAAAGGTGGGCCTGCCCATTAGCAGGAAATTGGTACTTAATTATTGAAAAAAAAATTATTGGTTGCTAAGAGATTCGAACTCTTGCATCTTACGATACCTGAGTATTCCCACAGTTAACTGCGGTCAAGATATTTCTTGAATCAGGCGCCTTAGACCGCTCGGCCAAACAACCACTTATTTGTTGAAAGCGAGCGCGGTACAAGTAATGTTACCTCATCTGATATACAATAAAGGTGGAGCGCCAATATATACGCATTTGACTGTTCATAATTCATTGAATATAATTTATTCCTTGTTAGTACAAAAGGGTTAAACAGAAAAAGACGTGACGTTGTAACCGAGAGGATG…	CGGGCCAACTGTAAGGTTCAGAGGCAAATGGATGCTCTGATGATAGTTTATTGTTATGTTCGAACATAGATTTTTGAGTTTCAATCCATTTCTTCAAGAATGGTAATGGCTTAACAACCTTCGGAATATATACCTTCCGAACCTCGTCCAGGTTAACAATTTCATCAACAACCCAGTTATTTGAAGGATCAATAACTTTTTTGTTACCATTAATTTCTTGTTGTTGGAACCCCCAAT
5306	5303	7	7	0	0	NC_001139	857273	857825	NC_001139	855071	856815	|gene note= GO_component: cytosol [goid 0005829] [evidence NAS] |neigh_up CDS[fcd=-1243](-,855269,856306) gene= RNR4 note= Rnr4p; |neigh_down CDS[fcd=743](+,858292,858609) gene= TIM13 note= Tim13p;	|gene gene= RNR4 note= synonyms: PSO3, CRT3 |CDS[fcd=363](-,855269,856306) gene= RNR4 note= Rnr4p;	CGGTTCCCTTTCTTGCCTGAAATGCTCGTTCTAATGGAAAAAAAAAGAAATAAAGGTGGGCCTGCCCATTAGCAGGAAATTGGTACTTAATTATTGAAAAAAAAATTATTGGTTGCTAAGAGATTCGAACTCTTGCATCTTACGATACCTGAGTATTCCCACAGTTAACTGCGGTCAAGATATTTCTTGAATCAGGCGCCTTAGACCGCTCGGCCAAACAACCACTTATTTGTTGAAAGCGAGCGCGGTACAAGTAATGTTACCTCATCTGATATACAATAAAGGTGGAGCGCCAATATATACGCATTTGACTGTTCATAATTCATTGAATATAATTTATTCCTTGTTAGTACAAAAGGGTTAAACAGAAAAAGACGTGACGTTGTAACCGAGAGGATG…	CGGGATGATGGTACTCTCTGAATCTTTCCCTTATCTACCTACAAGAAAATGGCAAATATTGTCATAATAAATATAAAAAAAAACTGTAGTTTCTTTTTAAATTTTTCTACTTAAGTTTAGTTATACTGTACCTAGGTATATATAAATATATATAAATAAAAGTGGCCAAGAATAAAAGAACGCACCCCGTCGTTGACTTAGAAGTCATCATCAAAGTTAATTTCCTTGGATGGGGTAGCGGACTTAGACATGTCACTGGCCTTTTGGTAGTCGGAAACCTTCTTTTCAAAGAAGGTGGTCTTACCAGCGGTAGCGACATCCTCCATGAATTCGAATGGGTTGACGGCGTTGTAGTATTTTTCGTTACCGAAACCTTGTAATAGACCGTCAGCGACAAAT…
5306	2932	1	1	0	0	NC_001139	857273	857825	NC_001136	1164942	1165078	|gene note= GO_component: cytosol [goid 0005829] [evidence NAS] |neigh_up CDS[fcd=-1243](-,855269,856306) gene= RNR4 note= Rnr4p; |neigh_down CDS[fcd=743](+,858292,858609) gene= TIM13 note= Tim13p;	|neigh_up CDS[fcd=-356](-,1162951,1164654) gene= HXT3 note= Hxt3p; |neigh_down CDS[fcd=3643](-,1167208,1168653) gene= SVF1 note= Svf1p;	CGGTTCCCTTTCTTGCCTGAAATGCTCGTTCTAATGGAAAAAAAAAGAAATAAAGGTGGGCCTGCCCATTAGCAGGAAATTGGTACTTAATTATTGAAAAAAAAATTATTGGTTGCTAAGAGATTCGAACTCTTGCATCTTACGATACCTGAGTATTCCCACAGTTAACTGCGGTCAAGATATTTCTTGAATCAGGCGCCTTAGACCGCTCGGCCAAACAACCACTTATTTGTTGAAAGCGAGCGCGGTACAAGTAATGTTACCTCATCTGATATACAATAAAGGTGGAGCGCCAATATATACGCATTTGACTGTTCATAATTCATTGAATATAATTTATTCCTTGTTAGTACAAAAGGGTTAAACAGAAAAAGACGTGACGTTGTAACCGAGAGGATG…	CGGAAATACCAACATCGGGGAAAGCGGAAAATCTGGAAAAATTCTCCACGAAGCTTTCTCTGTGATAATCCGCGACCGAGAGTTTAACCGAATCCGCGGAACGAGATATTCCGTGTTTATTGCGGTATTATATGAG
5306	5302	16	16	15	15	NC_001139	857273	857825	NC_001139	855036	855070	|gene note= GO_component: cytosol [goid 0005829] [evidence NAS] |neigh_up CDS[fcd=-1243](-,855269,856306) gene= RNR4 note= Rnr4p; |neigh_down CDS[fcd=743](+,858292,858609) gene= TIM13 note= Tim13p;	|neigh_up CDS[fcd=-153](-,853680,854900) gene= OKP1 note= Okp1p; |neigh_down CDS[fcd=1253](-,855269,856306) gene= RNR4 note= Rnr4p;	CGGTTCCCTTTCTTGCCTGAAATGCTCGTTCTAATGGAAAAAAAAAGAAATAAAGGTGGGCCTGCCCATTAGCAGGAAATTGGTACTTAATTATTGAAAAAAAAATTATTGGTTGCTAAGAGATTCGAACTCTTGCATCTTACGATACCTGAGTATTCCCACAGTTAACTGCGGTCAAGATATTTCTTGAATCAGGCGCCTTAGACCGCTCGGCCAAACAACCACTTATTTGTTGAAAGCGAGCGCGGTACAAGTAATGTTACCTCATCTGATATACAATAAAGGTGGAGCGCCAATATATACGCATTTGACTGTTCATAATTCATTGAATATAATTTATTCCTTGTTAGTACAAAAGGGTTAAACAGAAAAAGACGTGACGTTGTAACCGAGAGGATG…	CGGGTAACAAAAATATGTTATTTAAATGAAATGA
5306	2935	116	116	0	0	NC_001139	857273	857825	NC_001136	1165118	1165555	|gene note= GO_component: cytosol [goid 0005829] [evidence NAS] |neigh_up CDS[fcd=-1243](-,855269,856306) gene= RNR4 note= Rnr4p; |neigh_down CDS[fcd=743](+,858292,858609) gene= TIM13 note= Tim13p;	|neigh_up CDS[fcd=-682](-,1162951,1164654) gene= HXT3 note= Hxt3p; |neigh_down CDS[fcd=3317](-,1167208,1168653) gene= SVF1 note= Svf1p;	CGGTTCCCTTTCTTGCCTGAAATGCTCGTTCTAATGGAAAAAAAAAGAAATAAAGGTGGGCCTGCCCATTAGCAGGAAATTGGTACTTAATTATTGAAAAAAAAATTATTGGTTGCTAAGAGATTCGAACTCTTGCATCTTACGATACCTGAGTATTCCCACAGTTAACTGCGGTCAAGATATTTCTTGAATCAGGCGCCTTAGACCGCTCGGCCAAACAACCACTTATTTGTTGAAAGCGAGCGCGGTACAAGTAATGTTACCTCATCTGATATACAATAAAGGTGGAGCGCCAATATATACGCATTTGACTGTTCATAATTCATTGAATATAATTTATTCCTTGTTAGTACAAAAGGGTTAAACAGAAAAAGACGTGACGTTGTAACCGAGAGGATG…	CGGGCAGCAGGCGAAGCTGGAAGAATATAGCTAAGAAAATGCGCACGGAAAAAAAACACTCCCGAATTTCTCCGTGAAAAGAGCCTACTAGGGGATAATAGTAGGTATCCGTTAATATTACCGAACTATTGAAAACCTACCAAATGCAAGAAGATGCAAACGAGCTAGAATGTTCCGCGAATAGCTCATCTTACAATTTTTTTCTTTTTTCAAGAAAAAGAAAGTATTTTTTTTTCCTTTCATTTCATTGCTCCTCCTCCAGGTGTTATCTCGAGAAGATGAAGGCTGTCTGCGATGACGAATAGGAAAGAAAAAATTTTCCTTAATTTTGCTTGCTTAATTCTTATACGAATAATTCTTCTTAATCAACATCGGGCTTCATATTTACCAACACGCATT…
5306	2385	12	12	0	0	NC_001139	857273	857825	NC_001136	644441	644583	|gene note= GO_component: cytosol [goid 0005829] [evidence NAS] |neigh_up CDS[fcd=-1243](-,855269,856306) gene= RNR4 note= Rnr4p; |neigh_down CDS[fcd=743](+,858292,858609) gene= TIM13 note= Tim13p;	|gene gene= GRX3 |CDS[fcd=520](-,644175,645032) gene= GRX3 note= Grx3p;	CGGTTCCCTTTCTTGCCTGAAATGCTCGTTCTAATGGAAAAAAAAAGAAATAAAGGTGGGCCTGCCCATTAGCAGGAAATTGGTACTTAATTATTGAAAAAAAAATTATTGGTTGCTAAGAGATTCGAACTCTTGCATCTTACGATACCTGAGTATTCCCACAGTTAACTGCGGTCAAGATATTTCTTGAATCAGGCGCCTTAGACCGCTCGGCCAAACAACCACTTATTTGTTGAAAGCGAGCGCGGTACAAGTAATGTTACCTCATCTGATATACAATAAAGGTGGAGCGCCAATATATACGCATTTGACTGTTCATAATTCATTGAATATAATTTATTCCTTGTTAGTACAAAAGGGTTAAACAGAAAAAGACGTGACGTTGTAACCGAGAGGATG…	CGGCGCGGCATTGACCAATTTAGTCAATCTAGCGTTTATTTGCTCCTCAGTTTCTTCTTCCTCTTCTTCGTCGTCATCGTCTTCATCATTATGACTCCCCTCATTTACGTTTGCATTTTCCATAGTATGAGTTTGTGATGAT
5306	5301	5	5	111	111	NC_001139	857273	857825	NC_001139	854160	855035	|gene note= GO_component: cytosol [goid 0005829] [evidence NAS] |neigh_up CDS[fcd=-1243](-,855269,856306) gene= RNR4 note= Rnr4p; |neigh_down CDS[fcd=743](+,858292,858609) gene= TIM13 note= Tim13p;	|gene gene= OKP1 |CDS[fcd=303](-,853680,854900) gene= OKP1 note= Okp1p;	CGGTTCCCTTTCTTGCCTGAAATGCTCGTTCTAATGGAAAAAAAAAGAAATAAAGGTGGGCCTGCCCATTAGCAGGAAATTGGTACTTAATTATTGAAAAAAAAATTATTGGTTGCTAAGAGATTCGAACTCTTGCATCTTACGATACCTGAGTATTCCCACAGTTAACTGCGGTCAAGATATTTCTTGAATCAGGCGCCTTAGACCGCTCGGCCAAACAACCACTTATTTGTTGAAAGCGAGCGCGGTACAAGTAATGTTACCTCATCTGATATACAATAAAGGTGGAGCGCCAATATATACGCATTTGACTGTTCATAATTCATTGAATATAATTTATTCCTTGTTAGTACAAAAGGGTTAAACAGAAAAAGACGTGACGTTGTAACCGAGAGGATG…	CGGTTTTGAATAAATTGTCGCTTAGAATAAATATACTCGATGTCTAGATCTCTTTCCGATATCCTAGAGGGAAATTTGGCCTGTCTTAGCTTCTTCTTTATCTTTGTGAGGATTATTTCAAGCAAACGTTCCTTCTTAGAATATATTCTTTTAACCTCATTATTATCGCCATGCGTCATTTGGTTCATTTCCTTTTCGTACTTCTCAAAGACAGAATCAAGAGCGCTTACAGTGTTAGTCTCTAATAAACGAAGTATGGATCCTATCATTATTTTAGAAGGCTTTTTCCAATGCTTTAATTCATAATTGCGCGGCAACCTTTCTCTATACTCAGCTTGTATTACCTTCCTGAATTCCCAAGGTCGTACATTGCCCTCTCCACTTGTTGCGCTTCCATCC…
5306	4587	1	1	0	0	NC_001139	857273	857825	NC_001139	205209	205827	|gene note= GO_component: cytosol [goid 0005829] [evidence NAS] |neigh_up CDS[fcd=-1243](-,855269,856306) gene= RNR4 note= Rnr4p; |neigh_down CDS[fcd=743](+,858292,858609) gene= TIM13 note= Tim13p;	|LTR note= YGLWTAU2 |gene note= GO_component: cytosol [goid 0005829] [evidence NAS] |neigh_up CDS[fcd=-2791](+,202727,203839) note= Ygl159wp; |neigh_down CDS[fcd=1520](+,207038,208576) gene= RCK1 note= Rck1p;	CGGTTCCCTTTCTTGCCTGAAATGCTCGTTCTAATGGAAAAAAAAAGAAATAAAGGTGGGCCTGCCCATTAGCAGGAAATTGGTACTTAATTATTGAAAAAAAAATTATTGGTTGCTAAGAGATTCGAACTCTTGCATCTTACGATACCTGAGTATTCCCACAGTTAACTGCGGTCAAGATATTTCTTGAATCAGGCGCCTTAGACCGCTCGGCCAAACAACCACTTATTTGTTGAAAGCGAGCGCGGTACAAGTAATGTTACCTCATCTGATATACAATAAAGGTGGAGCGCCAATATATACGCATTTGACTGTTCATAATTCATTGAATATAATTTATTCCTTGTTAGTACAAAAGGGTTAAACAGAAAAAGACGTGACGTTGTAACCGAGAGGATG…	CGGAATTACTATCATATTGTTCGTAAGCAATAATAAATCAATTAGTGTGGGTGTTTTATACCTCTCTCATATGAGTATATAAAGATCCTTATTTAATTTTGATTATACTATCTTCTAGCCTTCAATTATCGACATCGCTCACTTGAGCAGTTCATCTAAGAAAAAAAGAACTATAGCTAAATAACCCAGTATTATTTGTTTCGCTGTAGGTTGTTGCACAAGGGTTTCTTCTGTGAACATTTTGAATTGTACGCTTAAGATGATAATACCTAACTGATTCCAACCTATATTAGTAGAACCGAAACATACAAATAAGTGGTTGTTTGGCCGAGCGGTCTAAGGCGCCTGATTCAAGCAATATCTTGACCGCAGTTAACTGTGGGAATACTCAGGTATCGT…
5306	5300	3	3	0	0	NC_001139	857273	857825	NC_001139	853597	854159	|gene note= GO_component: cytosol [goid 0005829] [evidence NAS] |neigh_up CDS[fcd=-1243](-,855269,856306) gene= RNR4 note= Rnr4p; |neigh_down CDS[fcd=743](+,858292,858609) gene= TIM13 note= Tim13p;	|gene gene= OKP1 |CDS[fcd=1022](-,853680,854900) gene= OKP1 note= Okp1p;	CGGTTCCCTTTCTTGCCTGAAATGCTCGTTCTAATGGAAAAAAAAAGAAATAAAGGTGGGCCTGCCCATTAGCAGGAAATTGGTACTTAATTATTGAAAAAAAAATTATTGGTTGCTAAGAGATTCGAACTCTTGCATCTTACGATACCTGAGTATTCCCACAGTTAACTGCGGTCAAGATATTTCTTGAATCAGGCGCCTTAGACCGCTCGGCCAAACAACCACTTATTTGTTGAAAGCGAGCGCGGTACAAGTAATGTTACCTCATCTGATATACAATAAAGGTGGAGCGCCAATATATACGCATTTGACTGTTCATAATTCATTGAATATAATTTATTCCTTGTTAGTACAAAAGGGTTAAACAGAAAAAGACGTGACGTTGTAACCGAGAGGATG…	CGGATGCTAATAGTGCATGATTATATATCAAATATTTAGTTATATGCATCGTAATCGTAAACTCTGAAACAATGGATTATCGCTAGTGTATATCTTCTTCGGTCTTATCTTGGTGCGACTCATGGTGCGGTACAAAAACCTCTTTGATTTCTTCTTCATGTGAATCCGAAATCATTTGACCCATTGTTTCCTTAAGTTCCTTTGATTTCTTCGTATATTCTTTCAAAGAAGGTAACAACGACAGTACTTCCTCCTTATCAAGCCTCACATCGGCTGTACTTTTTATGGGGTCGTTCAACATCAGGTTCAATTCGTGGCTATCATTTCTAAAAGTTACTGGGCCATCAGGATGCATAAATCCATTAGTAGATTCTAAGCCATATGTATATTCCATTGCTT…
5306	5307	65798	65798	117872	117872	NC_001139	857273	857825	NC_001139	857826	858130	|gene note= GO_component: cytosol [goid 0005829] [evidence NAS] |neigh_up CDS[fcd=-1243](-,855269,856306) gene= RNR4 note= Rnr4p; |neigh_down CDS[fcd=743](+,858292,858609) gene= TIM13 note= Tim13p;	|neigh_up CDS[fcd=-1672](-,855269,856306) gene= RNR4 note= Rnr4p; |neigh_down CDS[fcd=314](+,858292,858609) gene= TIM13 note= Tim13p;	CGGTTCCCTTTCTTGCCTGAAATGCTCGTTCTAATGGAAAAAAAAAGAAATAAAGGTGGGCCTGCCCATTAGCAGGAAATTGGTACTTAATTATTGAAAAAAAAATTATTGGTTGCTAAGAGATTCGAACTCTTGCATCTTACGATACCTGAGTATTCCCACAGTTAACTGCGGTCAAGATATTTCTTGAATCAGGCGCCTTAGACCGCTCGGCCAAACAACCACTTATTTGTTGAAAGCGAGCGCGGTACAAGTAATGTTACCTCATCTGATATACAATAAAGGTGGAGCGCCAATATATACGCATTTGACTGTTCATAATTCATTGAATATAATTTATTCCTTGTTAGTACAAAAGGGTTAAACAGAAAAAGACGTGACGTTGTAACCGAGAGGATG…	CGGTGTATTACCCGCAAGAATTCTGATAACGTTCAAGCTAAAACAAAACTGCTAAATGAGTTCTGAAATGGCATTTATGAGTACATATGATAGATTTGCTATGTATCAAACCTGGAACTGGCGCTAGCGCTATGGTTTCACTTCCTCATTAAACCATACCCTTGACGATTTGACAGGTCGCTACAGATTCAGAAAGAGATCATATCAATACAACAAATAAAATATAAGCGAATAAAGAGCAATGTCTTTCCCCTTTAGTCACATTACTAGCCAACGCTAATTCTTGATCTCCTTCCTCTTGTTT
5306	5306	12953	12953	22172	22172	NC_001139	857273	857825	NC_001139	857273	857825	|gene note= GO_component: cytosol [goid 0005829] [evidence NAS] |neigh_up CDS[fcd=-1243](-,855269,856306) gene= RNR4 note= Rnr4p; |neigh_down CDS[fcd=743](+,858292,858609) gene= TIM13 note= Tim13p;	|gene note= GO_component: cytosol [goid 0005829] [evidence NAS] |neigh_up CDS[fcd=-1243](-,855269,856306) gene= RNR4 note= Rnr4p; |neigh_down CDS[fcd=743](+,858292,858609) gene= TIM13 note= Tim13p;	CGGTTCCCTTTCTTGCCTGAAATGCTCGTTCTAATGGAAAAAAAAAGAAATAAAGGTGGGCCTGCCCATTAGCAGGAAATTGGTACTTAATTATTGAAAAAAAAATTATTGGTTGCTAAGAGATTCGAACTCTTGCATCTTACGATACCTGAGTATTCCCACAGTTAACTGCGGTCAAGATATTTCTTGAATCAGGCGCCTTAGACCGCTCGGCCAAACAACCACTTATTTGTTGAAAGCGAGCGCGGTACAAGTAATGTTACCTCATCTGATATACAATAAAGGTGGAGCGCCAATATATACGCATTTGACTGTTCATAATTCATTGAATATAATTTATTCCTTGTTAGTACAAAAGGGTTAAACAGAAAAAGACGTGACGTTGTAACCGAGAGGATG…	CGGTTCCCTTTCTTGCCTGAAATGCTCGTTCTAATGGAAAAAAAAAGAAATAAAGGTGGGCCTGCCCATTAGCAGGAAATTGGTACTTAATTATTGAAAAAAAAATTATTGGTTGCTAAGAGATTCGAACTCTTGCATCTTACGATACCTGAGTATTCCCACAGTTAACTGCGGTCAAGATATTTCTTGAATCAGGCGCCTTAGACCGCTCGGCCAAACAACCACTTATTTGTTGAAAGCGAGCGCGGTACAAGTAATGTTACCTCATCTGATATACAATAAAGGTGGAGCGCCAATATATACGCATTTGACTGTTCATAATTCATTGAATATAATTTATTCCTTGTTAGTACAAAAGGGTTAAACAGAAAAAGACGTGACGTTGTAACCGAGAGGATG…
5306	5305	47386	47386	105281	105281	NC_001139	857273	857825	NC_001139	856823	857272	|gene note= GO_component: cytosol [goid 0005829] [evidence NAS] |neigh_up CDS[fcd=-1243](-,855269,856306) gene= RNR4 note= Rnr4p; |neigh_down CDS[fcd=743](+,858292,858609) gene= TIM13 note= Tim13p;	|neigh_up CDS[fcd=-741](-,855269,856306) gene= RNR4 note= Rnr4p; |neigh_down CDS[fcd=1245](+,858292,858609) gene= TIM13 note= Tim13p;	CGGTTCCCTTTCTTGCCTGAAATGCTCGTTCTAATGGAAAAAAAAAGAAATAAAGGTGGGCCTGCCCATTAGCAGGAAATTGGTACTTAATTATTGAAAAAAAAATTATTGGTTGCTAAGAGATTCGAACTCTTGCATCTTACGATACCTGAGTATTCCCACAGTTAACTGCGGTCAAGATATTTCTTGAATCAGGCGCCTTAGACCGCTCGGCCAAACAACCACTTATTTGTTGAAAGCGAGCGCGGTACAAGTAATGTTACCTCATCTGATATACAATAAAGGTGGAGCGCCAATATATACGCATTTGACTGTTCATAATTCATTGAATATAATTTATTCCTTGTTAGTACAAAAGGGTTAAACAGAAAAAGACGTGACGTTGTAACCGAGAGGATG…	CGGTGCTTGGTGTTGGGTGGTCGTACCTGCTAGTTCCATTGGTGCGGTGTATGGGCGGGTACCCTCAAAAAGGGAAACGAAGGTAGGCGCACGGTGCTTATTAAGCTCAGAGGCGACCTCGCAGAAGGGGGCAGACCACACAAGCGGTGGAGGCGCTCCAGATATTCAGTGGAGTGGGGCTTGCTCATGTTCTGTTGTTGGTTTTGGATAGAAAAAGAGCGGGTTGAATAGTTTGCCATGGCAACCACTCTGGAAGCGAAATCACATAGACGCGTAAACACTCACACACAGGATATTCGTATAGCAAGGTACTAGTGGCGACACTCAGGTGGTCCTCGTTGCCTTATCTCCAGATTCCTCAATTTCTGTGAAACGTAAACATTATGGGAATAGTCTAGA…
5306	7955	1	1	11	12	NC_001139	857273	857825	NC_001143	342467	342651	|gene note= GO_component: cytosol [goid 0005829] [evidence NAS] |neigh_up CDS[fcd=-1243](-,855269,856306) gene= RNR4 note= Rnr4p; |neigh_down CDS[fcd=743](+,858292,858609) gene= TIM13 note= Tim13p;	|gene |CDS[fcd=2705](-,342496,345264) note= Ykl050cp;	CGGTTCCCTTTCTTGCCTGAAATGCTCGTTCTAATGGAAAAAAAAAGAAATAAAGGTGGGCCTGCCCATTAGCAGGAAATTGGTACTTAATTATTGAAAAAAAAATTATTGGTTGCTAAGAGATTCGAACTCTTGCATCTTACGATACCTGAGTATTCCCACAGTTAACTGCGGTCAAGATATTTCTTGAATCAGGCGCCTTAGACCGCTCGGCCAAACAACCACTTATTTGTTGAAAGCGAGCGCGGTACAAGTAATGTTACCTCATCTGATATACAATAAAGGTGGAGCGCCAATATATACGCATTTGACTGTTCATAATTCATTGAATATAATTTATTCCTTGTTAGTACAAAAGGGTTAAACAGAAAAAGACGTGACGTTGTAACCGAGAGGATG…	CGGTTATCATCAAACGATTGATAGAAAGTTAGATAACCTCTTTGAAAAAACTTTCCTTAGGAGAGGTATTGGAATCGTTGGAATCGCGAACTCTTATCTCCGATCCCTCTTGATCGTCTTGATCATCTGTAACTTCATTACTATAATCATTTTCTATCGAACCTTGAGAAAAGCCACTAAAAGA
5306	5310	4	4	7	7	NC_001139	857273	857825	NC_001139	865400	866256	|gene note= GO_component: cytosol [goid 0005829] [evidence NAS] |neigh_up CDS[fcd=-1243](-,855269,856306) gene= RNR4 note= Rnr4p; |neigh_down CDS[fcd=743](+,858292,858609) gene= TIM13 note= Tim13p;	|gene gene= UBR1 note= synonym: PTR1 |CDS[fcd=-70](-,859906,865758) gene= UBR1 note= Ubr1p;	CGGTTCCCTTTCTTGCCTGAAATGCTCGTTCTAATGGAAAAAAAAAGAAATAAAGGTGGGCCTGCCCATTAGCAGGAAATTGGTACTTAATTATTGAAAAAAAAATTATTGGTTGCTAAGAGATTCGAACTCTTGCATCTTACGATACCTGAGTATTCCCACAGTTAACTGCGGTCAAGATATTTCTTGAATCAGGCGCCTTAGACCGCTCGGCCAAACAACCACTTATTTGTTGAAAGCGAGCGCGGTACAAGTAATGTTACCTCATCTGATATACAATAAAGGTGGAGCGCCAATATATACGCATTTGACTGTTCATAATTCATTGAATATAATTTATTCCTTGTTAGTACAAAAGGGTTAAACAGAAAAAGACGTGACGTTGTAACCGAGAGGATG…	CGGTATGTTTATGGACGTCTCCTATTCTGGATTCATCTATCTTATAAAACGGAATAGTTTGTTGAGATGTTATCTTATCAATATCCACAGCATCTTCTAAACTGTCAGGAAAAACAGTAAGCTCTGGGTTAGATAATTTTTGTTTTGGATGAGCATTGAATAAAGTAGGTAAGTTCTCTCCGCTGTTAGAAATGACAAAGTATAGATATCTGTAAATGAACTCTTTAAGGGCTCTGCTCATGTCAGCCCTTTCAGTAGGACCTCTCGTATACCTAAAATAGGGGAGGTTATGAATAGACCTCAGTGTTCTCCTAATGTGACCTTGTAAAGATCCTAAATCATCATCAGCAACGGACATATTGGAATGTTCTATGTAATTTGTGTGACCTGTAAAGATTA…
5306	12471	1	1	0	0	NC_001139	857273	857825	NC_001147	769610	770112	|gene note= GO_component: cytosol [goid 0005829] [evidence NAS] |neigh_up CDS[fcd=-1243](-,855269,856306) gene= RNR4 note= Rnr4p; |neigh_down CDS[fcd=743](+,858292,858609) gene= TIM13 note= Tim13p;	|gene gene= WTM2 |CDS[fcd=-1451](+,768410,769813) gene= WTM2 note= Wtm2p;	CGGTTCCCTTTCTTGCCTGAAATGCTCGTTCTAATGGAAAAAAAAAGAAATAAAGGTGGGCCTGCCCATTAGCAGGAAATTGGTACTTAATTATTGAAAAAAAAATTATTGGTTGCTAAGAGATTCGAACTCTTGCATCTTACGATACCTGAGTATTCCCACAGTTAACTGCGGTCAAGATATTTCTTGAATCAGGCGCCTTAGACCGCTCGGCCAAACAACCACTTATTTGTTGAAAGCGAGCGCGGTACAAGTAATGTTACCTCATCTGATATACAATAAAGGTGGAGCGCCAATATATACGCATTTGACTGTTCATAATTCATTGAATATAATTTATTCCTTGTTAGTACAAAAGGGTTAAACAGAAAAAGACGTGACGTTGTAACCGAGAGGATG…	CGGAGGAACTTCAGGGTCAATGTTTAAAATTTTTCCACACAGGTGGCACAAGAAGATCGAGCAACCAATTCGGGAAGAGGAACACTGTGGCGCTACACCCCGTAATCAATGATTTTGTTGGCACTGTTGATTCAGATAGTCTTGTTACTGCCTACAAACCATTTCTGGCCAGTGACTTCATTGGCAGAGGTTACGACGATTAAAAAAAAAAAAGAGTAAGAAATTAACGTTACCACCTATGGGAAAGGCAGTAACTCACAAGCATTCACGTACATAATTCTGTTTTTTTTTTTTTTATTCATTTCTAGCACGCTATCGGGGTTATTTTTTTTTTTGTAATATATAGTGATGGTATAATGTTGTATAGATACTGGTATCGCTCCTAATAAAGACTCTTTC…
5306	5309	6	6	0	0	NC_001139	857273	857825	NC_001139	864447	865399	|gene note= GO_component: cytosol [goid 0005829] [evidence NAS] |neigh_up CDS[fcd=-1243](-,855269,856306) gene= RNR4 note= Rnr4p; |neigh_down CDS[fcd=743](+,858292,858609) gene= TIM13 note= Tim13p;	|gene gene= UBR1 note= synonym: PTR1 |CDS[fcd=835](-,859906,865758) gene= UBR1 note= Ubr1p;	CGGTTCCCTTTCTTGCCTGAAATGCTCGTTCTAATGGAAAAAAAAAGAAATAAAGGTGGGCCTGCCCATTAGCAGGAAATTGGTACTTAATTATTGAAAAAAAAATTATTGGTTGCTAAGAGATTCGAACTCTTGCATCTTACGATACCTGAGTATTCCCACAGTTAACTGCGGTCAAGATATTTCTTGAATCAGGCGCCTTAGACCGCTCGGCCAAACAACCACTTATTTGTTGAAAGCGAGCGCGGTACAAGTAATGTTACCTCATCTGATATACAATAAAGGTGGAGCGCCAATATATACGCATTTGACTGTTCATAATTCATTGAATATAATTTATTCCTTGTTAGTACAAAAGGGTTAAACAGAAAAAGACGTGACGTTGTAACCGAGAGGATG…	CGGTGTCATATCACGACATTCTGTTGCATTTAAGTATTCTGAACACAGGGTTTTACCCATCATGTTCCTAAAAGTGGTTTGGAAGGAGGAGTTTGGTATGTTTAAACAGTGTGTAATCCAAAGGATGATATACTTGCATGTTTCTTGATGAAGATATTCTGACCACGATGTTAAAGTGGCACTTAATCCATTCGTTTGAACAGCAAAAAAACCACCTAAGACAGATGATAAATCTTGTGAACATTTCAACATTGCTCGACCTTCTCCGTCAATCCTGGATGTTAATAGATCAATGTGTACGTTATCTGGAACCCCCTGTCTCAAGGCAGTCGTAGCCTGCGAATAGTTATGATATTCATCGTTATATATTATTACCGTGTAATTTTCGGGATCGATTTT…
5306	5308	32	32	6	6	NC_001139	857273	857825	NC_001139	858131	864446	|gene note= GO_component: cytosol [goid 0005829] [evidence NAS] |neigh_up CDS[fcd=-1243](-,855269,856306) gene= RNR4 note= Rnr4p; |neigh_down CDS[fcd=743](+,858292,858609) gene= TIM13 note= Tim13p;	|gene gene= TIM13 |CDS(+,858292,858609) gene= TIM13 note= Tim13p; |gene gene= QCR9 note= synonym: UCR9 gene= QCR9 note= Qcr9p; |gene gene= UBR1 note= synonym: PTR1 |CDS(-,859906,865758) gene= UBR1 note= Ubr1p;	CGGTTCCCTTTCTTGCCTGAAATGCTCGTTCTAATGGAAAAAAAAAGAAATAAAGGTGGGCCTGCCCATTAGCAGGAAATTGGTACTTAATTATTGAAAAAAAAATTATTGGTTGCTAAGAGATTCGAACTCTTGCATCTTACGATACCTGAGTATTCCCACAGTTAACTGCGGTCAAGATATTTCTTGAATCAGGCGCCTTAGACCGCTCGGCCAAACAACCACTTATTTGTTGAAAGCGAGCGCGGTACAAGTAATGTTACCTCATCTGATATACAATAAAGGTGGAGCGCCAATATATACGCATTTGACTGTTCATAATTCATTGAATATAATTTATTCCTTGTTAGTACAAAAGGGTTAAACAGAAAAAGACGTGACGTTGTAACCGAGAGGATG…	CGGTGTATCTTAGTTTTCCTGGCGTTGCCGAAGAGTAAAAAAATCCTAGGTCCTAAGATTTATAAAATCGACAAAAAGAGGATTCAAGTAGGATATCTGTCAGTTCAAACCAATCAATCTTTTCTCTCCAACAACAGTTTGAGCTTATTTAATCAAGAAAATGGGTCTATCATCTATCTTTGGCGGCGGTGCACCATCACAACAAAAGGAAGCAGCCACTACTGCAAAGACAACCCCAAACCCTATAGCCAAGGAGCTGAAAAACCAAATTGCTCAAGAACTGGCTGTGGCTAATGCGACTGAATTAGTGAACAAAATTTCTGAGAACTGCTTTGAAAAATGCTTAACTTCGCCATACGCTACCAGAAACGATGCGTGCATTGACCAGTGTTTGGCTAA…
5306	12972	1	1	0	0	NC_001139	857273	857825	NC_001148	130767	131049	|gene note= GO_component: cytosol [goid 0005829] [evidence NAS] |neigh_up CDS[fcd=-1243](-,855269,856306) gene= RNR4 note= Rnr4p; |neigh_down CDS[fcd=743](+,858292,858609) gene= TIM13 note= Tim13p;	|gene gene= FMP40 |CDS[fcd=-747](+,130161,132227) gene= FMP40 note= Fmp40p;	CGGTTCCCTTTCTTGCCTGAAATGCTCGTTCTAATGGAAAAAAAAAGAAATAAAGGTGGGCCTGCCCATTAGCAGGAAATTGGTACTTAATTATTGAAAAAAAAATTATTGGTTGCTAAGAGATTCGAACTCTTGCATCTTACGATACCTGAGTATTCCCACAGTTAACTGCGGTCAAGATATTTCTTGAATCAGGCGCCTTAGACCGCTCGGCCAAACAACCACTTATTTGTTGAAAGCGAGCGCGGTACAAGTAATGTTACCTCATCTGATATACAATAAAGGTGGAGCGCCAATATATACGCATTTGACTGTTCATAATTCATTGAATATAATTTATTCCTTGTTAGTACAAAAGGGTTAAACAGAAAAAGACGTGACGTTGTAACCGAGAGGATG…	CGGGGACGAAGGCGCAAAGGCGCAATCAAGAACCGTGCGCTGTTGTATGCCGTTTTGCGCCCAGCTGGATCCGCTTGGGTAACTTCAACCTATTCAGATGGCGGCACGACTTGAAAGGGTTGATCCAACTATCAGATTATTGCATTGAGGAATTGTTTGCTGGGGGGACCCAATTTGAGGGGAAACCCGACTTTAATATATTCAAAAGGGATTTTTTTCCTGACACTGAGACGAAGATTGATGAGCAGGTGGAAAAGGATGAAACTGAGGTGAGTACCATGA
5306	9718	2	2	0	0	NC_001139	857273	857825	NC_001145	86532	86839	|gene note= GO_component: cytosol [goid 0005829] [evidence NAS] |neigh_up CDS[fcd=-1243](-,855269,856306) gene= RNR4 note= Rnr4p; |neigh_down CDS[fcd=743](+,858292,858609) gene= TIM13 note= Tim13p;	|gene gene= PRE8 |CDS[fcd=54](-,85987,86739) gene= PRE8 note= Pre8p;	CGGTTCCCTTTCTTGCCTGAAATGCTCGTTCTAATGGAAAAAAAAAGAAATAAAGGTGGGCCTGCCCATTAGCAGGAAATTGGTACTTAATTATTGAAAAAAAAATTATTGGTTGCTAAGAGATTCGAACTCTTGCATCTTACGATACCTGAGTATTCCCACAGTTAACTGCGGTCAAGATATTTCTTGAATCAGGCGCCTTAGACCGCTCGGCCAAACAACCACTTATTTGTTGAAAGCGAGCGCGGTACAAGTAATGTTACCTCATCTGATATACAATAAAGGTGGAGCGCCAATATATACGCATTTGACTGTTCATAATTCATTGAATATAATTTATTCCTTGTTAGTACAAAAGGGTTAAACAGAAAAAGACGTGACGTTGTAACCGAGAGGATG…	CGGTGTTAGTAAGGATACCTTCGAAAGTGTTTCTGACATGGCCAGTGGCGAGGACGACTTCTTTTCTGTGGCAATTACTACACCATTCGTAGCTTTTATACCCAATGAGGTGACACCTTGTTTTACTGCCGTCAAGGCGTAATCAATTTGACCCAATTTACCGCTGGGAGAAAAAGTGGTCAACGAAAAAGAATATCTGTCGGTCATAATTATAGAACTGTGTTGATTGGTGTCTTATGGTTGCTTACTACTAATTGAAACTAAAAATATAAAATGCTTCACCTATTCCACTCTCAGCTTATTGGGG
5306	238	1	1	0	0	NC_001139	857273	857825	NC_001133	195629	196231	|gene note= GO_component: cytosol [goid 0005829] [evidence NAS] |neigh_up CDS[fcd=-1243](-,855269,856306) gene= RNR4 note= Rnr4p; |neigh_down CDS[fcd=743](+,858292,858609) gene= TIM13 note= Tim13p;	|gene gene= SWH1 note= synonyms: OSH1, YAR044W |CDS[fcd=-3317](+,192613,196179) gene= SWH1 note= Swh1p;	CGGTTCCCTTTCTTGCCTGAAATGCTCGTTCTAATGGAAAAAAAAAGAAATAAAGGTGGGCCTGCCCATTAGCAGGAAATTGGTACTTAATTATTGAAAAAAAAATTATTGGTTGCTAAGAGATTCGAACTCTTGCATCTTACGATACCTGAGTATTCCCACAGTTAACTGCGGTCAAGATATTTCTTGAATCAGGCGCCTTAGACCGCTCGGCCAAACAACCACTTATTTGTTGAAAGCGAGCGCGGTACAAGTAATGTTACCTCATCTGATATACAATAAAGGTGGAGCGCCAATATATACGCATTTGACTGTTCATAATTCATTGAATATAATTTATTCCTTGTTAGTACAAAAGGGTTAAACAGAAAAAGACGTGACGTTGTAACCGAGAGGATG…	CGGTGCATATGAAGTCAGAGGTGAAGTATTCAACAAGGACGATAAAAAATTATGGGTTCTTGGTGGGCATTGGAATGATTCCATTTACGGGAAAAAAGTAACTGCTAGAGGCGGAGAACTGACATTAGACAGAATAAAAACGGCAAATTCTGCCACGGGAGGACCAAAACTAGATGGGTCTAAGTTTCTGATATGGAAAGCAAATGAAAGGCCTTCAGTGCCATTTAATTTAACGTCGTTTGCATTGACTTTGAATGCTTTGCCACCCCACTTGATACCATATTTAGCACCCACAGATAGTCGTTTAAGGCCCGATCAAAGGGCTATGGAAAATGGTGAATACGATAAAGCTGCCGCGGAAAAGCATCGTGTTGAAGTAAAACAAAGGGCAGCAAAAAA…
5306	9921	1	1	0	0	NC_001139	857273	857825	NC_001145	278736	279232	|gene note= GO_component: cytosol [goid 0005829] [evidence NAS] |neigh_up CDS[fcd=-1243](-,855269,856306) gene= RNR4 note= Rnr4p; |neigh_down CDS[fcd=743](+,858292,858609) gene= TIM13 note= Tim13p;	|gene gene= PLB2 |CDS[fcd=697](-,277561,279681) gene= PLB2 note= Plb2p;	CGGTTCCCTTTCTTGCCTGAAATGCTCGTTCTAATGGAAAAAAAAAGAAATAAAGGTGGGCCTGCCCATTAGCAGGAAATTGGTACTTAATTATTGAAAAAAAAATTATTGGTTGCTAAGAGATTCGAACTCTTGCATCTTACGATACCTGAGTATTCCCACAGTTAACTGCGGTCAAGATATTTCTTGAATCAGGCGCCTTAGACCGCTCGGCCAAACAACCACTTATTTGTTGAAAGCGAGCGCGGTACAAGTAATGTTACCTCATCTGATATACAATAAAGGTGGAGCGCCAATATATACGCATTTGACTGTTCATAATTCATTGAATATAATTTATTCCTTGTTAGTACAAAAGGGTTAAACAGAAAAAGACGTGACGTTGTAACCGAGAGGATG…	CGGTTTACCATTTGTAACGTTGGTACCTAGATATTTCACATCCGTAAAAGCGTTCAAAGAAGGATCCCAAGAACCCATTTCAAATGGAGTGAACTCGAAAAGAGTGGCATTCAAGTTTATCACGGTGGTACCTGGGTATCTACCATCTGCAACAGTAATTGGTAAAGGCATTTCACCGTTTTTGAACACATCAACATCTCTCAAAGAGGACCAAGTCAAAGCGGAGCCAGCATCTGGCAAGCTTGGAAAGAAGTTGTAAGAAAGTGCACGGGCCCACAAATCCGACAAAGATATATTGAAGCCTGCATCAGACTTAGCCTGCACTTCTTGTACAATGGACTCCCATCTTTCAATTGTGTAGGTCAAATTAGAGCCACCAGGGTTCACAATGGATTTCGT…
5306	12970	1	1	0	0	NC_001139	857273	857825	NC_001148	130519	130632	|gene note= GO_component: cytosol [goid 0005829] [evidence NAS] |neigh_up CDS[fcd=-1243](-,855269,856306) gene= RNR4 note= Rnr4p; |neigh_down CDS[fcd=743](+,858292,858609) gene= TIM13 note= Tim13p;	|gene gene= FMP40 |CDS[fcd=-414](+,130161,132227) gene= FMP40 note= Fmp40p;	CGGTTCCCTTTCTTGCCTGAAATGCTCGTTCTAATGGAAAAAAAAAGAAATAAAGGTGGGCCTGCCCATTAGCAGGAAATTGGTACTTAATTATTGAAAAAAAAATTATTGGTTGCTAAGAGATTCGAACTCTTGCATCTTACGATACCTGAGTATTCCCACAGTTAACTGCGGTCAAGATATTTCTTGAATCAGGCGCCTTAGACCGCTCGGCCAAACAACCACTTATTTGTTGAAAGCGAGCGCGGTACAAGTAATGTTACCTCATCTGATATACAATAAAGGTGGAGCGCCAATATATACGCATTTGACTGTTCATAATTCATTGAATATAATTTATTCCTTGTTAGTACAAAAGGGTTAAACAGAAAAAGACGTGACGTTGTAACCGAGAGGATG…	CGGATTTCAATTCGGCTCATTTGCTGCACAGCTGGGAGACGGACGTGTGGTAAACTTGTTTGATCTTAAGGACAAGTGTAGCGGACAATGGCAAACGTTTCAGTTGAAAGGTG
5306	12111	2	2	0	0	NC_001139	857273	857825	NC_001147	460446	460982	|gene note= GO_component: cytosol [goid 0005829] [evidence NAS] |neigh_up CDS[fcd=-1243](-,855269,856306) gene= RNR4 note= Rnr4p; |neigh_down CDS[fcd=743](+,858292,858609) gene= TIM13 note= Tim13p;	|gene gene= THI71 note= synonym: YOR29-22 |CDS[fcd=564](-,459482,461278) gene= THI71 note= Thi71p;	CGGTTCCCTTTCTTGCCTGAAATGCTCGTTCTAATGGAAAAAAAAAGAAATAAAGGTGGGCCTGCCCATTAGCAGGAAATTGGTACTTAATTATTGAAAAAAAAATTATTGGTTGCTAAGAGATTCGAACTCTTGCATCTTACGATACCTGAGTATTCCCACAGTTAACTGCGGTCAAGATATTTCTTGAATCAGGCGCCTTAGACCGCTCGGCCAAACAACCACTTATTTGTTGAAAGCGAGCGCGGTACAAGTAATGTTACCTCATCTGATATACAATAAAGGTGGAGCGCCAATATATACGCATTTGACTGTTCATAATTCATTGAATATAATTTATTCCTTGTTAGTACAAAAGGGTTAAACAGAAAAAGACGTGACGTTGTAACCGAGAGGATG…	CGGTCCAGATAGCCAAATTGGAGGAACCGAATCTTGAATAGTCACTTTGGTTGGTGGAACCTGGAGAAATGGAACCGAACCAGTATGAAATCATGTAAACCCAAGCCCATGCTCTTTTAGAACCAGTAACGGTAGATTTTGTGGAGGTAAACAATTCACCGACACCATGGGCATTCTTAGTCAAGTAAATCACTATACCCAGCATGGCAAAGCAAGTAGCTACACATGACCAAATTAAAAGGTAGTTCATATGGTAGGGTTTCATGAAATAGCAGAGCGCGGTGAGGACGTGGAAAATAATGAAGCCGACCAACTGCTTGGTGGTCATGGCAACACTTGGGGACAAAGTATTGGGCAGGTGCAGATAGTGGTGGGACCAGGAATCTAATATCATGTTGA…
5306	10783	1	1	0	0	NC_001139	857273	857825	NC_001146	116053	116351	|gene note= GO_component: cytosol [goid 0005829] [evidence NAS] |neigh_up CDS[fcd=-1243](-,855269,856306) gene= RNR4 note= Rnr4p; |neigh_down CDS[fcd=743](+,858292,858609) gene= TIM13 note= Tim13p;	|gene gene= CAF120 |CDS[fcd=-2931](+,113271,116453) gene= CAF120 note= Caf120p;	CGGTTCCCTTTCTTGCCTGAAATGCTCGTTCTAATGGAAAAAAAAAGAAATAAAGGTGGGCCTGCCCATTAGCAGGAAATTGGTACTTAATTATTGAAAAAAAAATTATTGGTTGCTAAGAGATTCGAACTCTTGCATCTTACGATACCTGAGTATTCCCACAGTTAACTGCGGTCAAGATATTTCTTGAATCAGGCGCCTTAGACCGCTCGGCCAAACAACCACTTATTTGTTGAAAGCGAGCGCGGTACAAGTAATGTTACCTCATCTGATATACAATAAAGGTGGAGCGCCAATATATACGCATTTGACTGTTCATAATTCATTGAATATAATTTATTCCTTGTTAGTACAAAAGGGTTAAACAGAAAAAGACGTGACGTTGTAACCGAGAGGATG…	CGGAAACCCATACTCAACGGGGAACAGGCCAAACATGCAAGCGCAATATCACCCGCAGCAGGTGCCCATGCCTATCCTGCAGCAGCCCAATCGCCCGTACCAACCTTATGCGATGAATACGCACATGGGCTCTCCTGGCGGATATGCTGGGGCAGCACCACCATTTCAGCCAGCTAACGTCAACTACAATACTAGGCCTCAGCAGCCATGGCCTACACCTAACTCACCATCCGCACACTACCGTCCGCCCCCTAACCTGAACCAGCCTCAAAACGGTAGTGCTGGTTACTATCGTCCG
5306	7427	1	1	5	5	NC_001139	857273	857825	NC_001142	647264	647727	|gene note= GO_component: cytosol [goid 0005829] [evidence NAS] |neigh_up CDS[fcd=-1243](-,855269,856306) gene= RNR4 note= Rnr4p; |neigh_down CDS[fcd=743](+,858292,858609) gene= TIM13 note= Tim13p;	|gene |CDS(+,647120,647470) note= Yjr120wp; |gene gene= ATP2 |CDS(+,647601,649136) gene= ATP2 note= Atp2p;	CGGTTCCCTTTCTTGCCTGAAATGCTCGTTCTAATGGAAAAAAAAAGAAATAAAGGTGGGCCTGCCCATTAGCAGGAAATTGGTACTTAATTATTGAAAAAAAAATTATTGGTTGCTAAGAGATTCGAACTCTTGCATCTTACGATACCTGAGTATTCCCACAGTTAACTGCGGTCAAGATATTTCTTGAATCAGGCGCCTTAGACCGCTCGGCCAAACAACCACTTATTTGTTGAAAGCGAGCGCGGTACAAGTAATGTTACCTCATCTGATATACAATAAAGGTGGAGCGCCAATATATACGCATTTGACTGTTCATAATTCATTGAATATAATTTATTCCTTGTTAGTACAAAAGGGTTAAACAGAAAAAGACGTGACGTTGTAACCGAGAGGATG…	CGGCCAAGCAGCGCAAGGATATTCCCATCTTCGAGCTCTTAGATACAACGCTTATAAAGAACGCACTTTTTGCATTAACCTCTTTTTTGTATTACAGAACAAACATTTTAACTTGCCCTTTTTTAAACTTTCTTTATCTCTCCAGGACAGGCCAATTGGATAAATTTTGCAAAGATCAAACAGTAACACAAATTTTAGCAACCTAAACCCCCCTCATAAACGAAGACAAAAGTGCTCCTCCTCAAGTCAAATTTGTCTTTCTTTTCTTTCATTTTTTAGTCTGTTGTTATCCAATTTATACTGAATCTTTGAGAGAAAACAAAAATAAAAAAAAGAATGGTTTTGCCAAGACTATATACTGCTACATCCCGTGCTGCTTTTAAAGCAGCCAAACAATCC…
5306	10201	14	14	0	0	NC_001139	857273	857825	NC_001145	525574	526029	|gene note= GO_component: cytosol [goid 0005829] [evidence NAS] |neigh_up CDS[fcd=-1243](-,855269,856306) gene= RNR4 note= Rnr4p; |neigh_down CDS[fcd=743](+,858292,858609) gene= TIM13 note= Tim13p;	|gene gene= ECM16 note= synonym: DHR1 |CDS[fcd=-2106](+,523695,527498) gene= ECM16 note= Ecm16p;	CGGTTCCCTTTCTTGCCTGAAATGCTCGTTCTAATGGAAAAAAAAAGAAATAAAGGTGGGCCTGCCCATTAGCAGGAAATTGGTACTTAATTATTGAAAAAAAAATTATTGGTTGCTAAGAGATTCGAACTCTTGCATCTTACGATACCTGAGTATTCCCACAGTTAACTGCGGTCAAGATATTTCTTGAATCAGGCGCCTTAGACCGCTCGGCCAAACAACCACTTATTTGTTGAAAGCGAGCGCGGTACAAGTAATGTTACCTCATCTGATATACAATAAAGGTGGAGCGCCAATATATACGCATTTGACTGTTCATAATTCATTGAATATAATTTATTCCTTGTTAGTACAAAAGGGTTAAACAGAAAAAGACGTGACGTTGTAACCGAGAGGATG…	CGGTCAGCAGGAAATTACACACATGGTAAAAAGGCTAAGAAAGGAATTTCCTTTTAAGAAAAACTCCAAGTACAACAAAGATTTAGAAACACCCGTTTCTAAAATGGGTATCAATTCAAAAACAACAGATTTGGAGGCTGAGGATATAGACTTCAGTGTACAAGTTATCGATCAAGATAAGTTCAAGAGCGCGATAAGATACGAAGAAGATGAAGGTAACAGTGGAAACGGTGAAGATGAGGAAGACGAAGAGGAAGAAGGGTTTGAAGAAGTCCTAACTGAAGGGCAAACAGCTAACGATCCTTTATATGTCCTTCCACTGTATTCTCTATTACCAACCAAGGAACAAATGAGAGTCTTTCAAAAACCTCCTCAAGGTTCTAGGCTTTGTATTGTTGC…
5306	5257	2	2	0	0	NC_001139	857273	857825	NC_001139	805446	805475	|gene note= GO_component: cytosol [goid 0005829] [evidence NAS] |neigh_up CDS[fcd=-1243](-,855269,856306) gene= RNR4 note= Rnr4p; |neigh_down CDS[fcd=743](+,858292,858609) gene= TIM13 note= Tim13p;	|gene gene= MTR3 |CDS[fcd=566](-,805274,806026) gene= MTR3 note= Mtr3p;	CGGTTCCCTTTCTTGCCTGAAATGCTCGTTCTAATGGAAAAAAAAAGAAATAAAGGTGGGCCTGCCCATTAGCAGGAAATTGGTACTTAATTATTGAAAAAAAAATTATTGGTTGCTAAGAGATTCGAACTCTTGCATCTTACGATACCTGAGTATTCCCACAGTTAACTGCGGTCAAGATATTTCTTGAATCAGGCGCCTTAGACCGCTCGGCCAAACAACCACTTATTTGTTGAAAGCGAGCGCGGTACAAGTAATGTTACCTCATCTGATATACAATAAAGGTGGAGCGCCAATATATACGCATTTGACTGTTCATAATTCATTGAATATAATTTATTCCTTGTTAGTACAAAAGGGTTAAACAGAAAAAGACGTGACGTTGTAACCGAGAGGATG…	CGGCACCTGCCATATCCACTAATTCGATG
5306	5258	2	2	0	0	NC_001139	857273	857825	NC_001139	805476	805625	|gene note= GO_component: cytosol [goid 0005829] [evidence NAS] |neigh_up CDS[fcd=-1243](-,855269,856306) gene= RNR4 note= Rnr4p; |neigh_down CDS[fcd=743](+,858292,858609) gene= TIM13 note= Tim13p;	|gene gene= MTR3 |CDS[fcd=476](-,805274,806026) gene= MTR3 note= Mtr3p;	CGGTTCCCTTTCTTGCCTGAAATGCTCGTTCTAATGGAAAAAAAAAGAAATAAAGGTGGGCCTGCCCATTAGCAGGAAATTGGTACTTAATTATTGAAAAAAAAATTATTGGTTGCTAAGAGATTCGAACTCTTGCATCTTACGATACCTGAGTATTCCCACAGTTAACTGCGGTCAAGATATTTCTTGAATCAGGCGCCTTAGACCGCTCGGCCAAACAACCACTTATTTGTTGAAAGCGAGCGCGGTACAAGTAATGTTACCTCATCTGATATACAATAAAGGTGGAGCGCCAATATATACGCATTTGACTGTTCATAATTCATTGAATATAATTTATTCCTTGTTAGTACAAAAGGGTTAAACAGAAAAAGACGTGACGTTGTAACCGAGAGGATG…	CGGCATCAGCTAAGGCTAGCGTTATACTAGTGATACAATGTGGTATGAGAGATGATATTTGAGAAGACATCATTTTGCTTTGCGAATCGTCGTCCTGAGGATTATTTGTAAGATCCTTATCATACGTTAAATAAACGAAGATATCGATG
5306	4560	1	1	0	0	NC_001139	857273	857825	NC_001139	180953	181782	|gene note= GO_component: cytosol [goid 0005829] [evidence NAS] |neigh_up CDS[fcd=-1243](-,855269,856306) gene= RNR4 note= Rnr4p; |neigh_down CDS[fcd=743](+,858292,858609) gene= TIM13 note= Tim13p;	|gene gene= NUP49 note= synonym: NSP49 |CDS[fcd=-661](+,180706,182124) gene= NUP49 note= Nup49p;	CGGTTCCCTTTCTTGCCTGAAATGCTCGTTCTAATGGAAAAAAAAAGAAATAAAGGTGGGCCTGCCCATTAGCAGGAAATTGGTACTTAATTATTGAAAAAAAAATTATTGGTTGCTAAGAGATTCGAACTCTTGCATCTTACGATACCTGAGTATTCCCACAGTTAACTGCGGTCAAGATATTTCTTGAATCAGGCGCCTTAGACCGCTCGGCCAAACAACCACTTATTTGTTGAAAGCGAGCGCGGTACAAGTAATGTTACCTCATCTGATATACAATAAAGGTGGAGCGCCAATATATACGCATTTGACTGTTCATAATTCATTGAATATAATTTATTCCTTGTTAGTACAAAAGGGTTAAACAGAAAAAGACGTGACGTTGTAACCGAGAGGATG…	CGGAGGGGGCCTTTTCGGTAACAAACCTAACAATACGGCGAACACTGGGGGCGGGTTATTTGGCGCTAATTCGAACAGTAATTCTGGCAGTTTGTTTGGTTCCAACAATGCACAGACGAGTCGTGGTTTGTTTGGTAATAATAACACTAATAATATCAATAATAGTAGTAGTGGCATGAATAATGCAAGCGCTGGACTATTTGGCTCTAAACCTGCAGGAGGCACTTCTTTGTTCGGTAATACAAGCACCTCTTCGGCCCCTGCGCAGAACCAGGGCATGTTTGGTGCAAAACCAGCTGGTACATCTCTATTCGGCAATAATGCAGGTAATACGACCACTGGTGGAGGGTTATTTGGCTCCAAACCGACAGGAGCAACGTCTTTGTTTGGTTCATCAAA…
5306	10277	1	1	0	0	NC_001139	857273	857825	NC_001145	592858	593544	|gene note= GO_component: cytosol [goid 0005829] [evidence NAS] |neigh_up CDS[fcd=-1243](-,855269,856306) gene= RNR4 note= Rnr4p; |neigh_down CDS[fcd=743](+,858292,858609) gene= TIM13 note= Tim13p;	|gene |CDS[fcd=1271](-,593366,594472) note= Ymr166cp;	CGGTTCCCTTTCTTGCCTGAAATGCTCGTTCTAATGGAAAAAAAAAGAAATAAAGGTGGGCCTGCCCATTAGCAGGAAATTGGTACTTAATTATTGAAAAAAAAATTATTGGTTGCTAAGAGATTCGAACTCTTGCATCTTACGATACCTGAGTATTCCCACAGTTAACTGCGGTCAAGATATTTCTTGAATCAGGCGCCTTAGACCGCTCGGCCAAACAACCACTTATTTGTTGAAAGCGAGCGCGGTACAAGTAATGTTACCTCATCTGATATACAATAAAGGTGGAGCGCCAATATATACGCATTTGACTGTTCATAATTCATTGAATATAATTTATTCCTTGTTAGTACAAAAGGGTTAAACAGAAAAAGACGTGACGTTGTAACCGAGAGGATG…	CGGAAAAGCCGAGAAAAAGAGATAGATAATAGAGAAAAGAGAGCCCATTGTCTAAAGGGAGGGAAACCGAAGGACGAAAAGGGCCCGCGACAGACCGTTTAGAGAATGAGCAGCACGTGGGCACTTCGATTTTGTCTCCCAGTGATGTAGTGTTATGATATACAAGATGAGTTTGGACCCTGTTCAAGCAAATCTGTCACATTTGTTAGACTTTTTTTTAAACGAGCCCTCCAAACAAGAACGCTCAGTGTTAGGAACTGCGAACGAAGAGAGAAATGCGTATTAAACTTAGATGAGTATTCTTGCCGTAAATGACTATATACAAAACTTATTCGGAAGAACCTATATCTATGTATGTGAAATGATAAGTACAAGACCCACTGTGATGTGCAGTGATGG…
5306	7452	5	5	0	0	NC_001139	857273	857825	NC_001142	668173	668440	|gene note= GO_component: cytosol [goid 0005829] [evidence NAS] |neigh_up CDS[fcd=-1243](-,855269,856306) gene= RNR4 note= Rnr4p; |neigh_down CDS[fcd=743](+,858292,858609) gene= TIM13 note= Tim13p;	|gene gene= MNS1 |CDS[fcd=-668](+,667638,669287) gene= MNS1 note= Mns1p;	CGGTTCCCTTTCTTGCCTGAAATGCTCGTTCTAATGGAAAAAAAAAGAAATAAAGGTGGGCCTGCCCATTAGCAGGAAATTGGTACTTAATTATTGAAAAAAAAATTATTGGTTGCTAAGAGATTCGAACTCTTGCATCTTACGATACCTGAGTATTCCCACAGTTAACTGCGGTCAAGATATTTCTTGAATCAGGCGCCTTAGACCGCTCGGCCAAACAACCACTTATTTGTTGAAAGCGAGCGCGGTACAAGTAATGTTACCTCATCTGATATACAATAAAGGTGGAGCGCCAATATATACGCATTTGACTGTTCATAATTCATTGAATATAATTTATTCCTTGTTAGTACAAAAGGGTTAAACAGAAAAAGACGTGACGTTGTAACCGAGAGGATG…	CGGAATTCCATACTCAAGTATAAACCTTCATAGTGGCCAAGCGGTTAAGAACCATGCAGATGGGGGGGCATCTTCTACCGCAGAATTCACTACGCTACAAATGGAATTCAAATATCTGGCGTATTTGACAGGAAATCGTACTTATTGGGAGCTGGTGGAGCGTGTTTACGAGCCATTATACAAAAATAACGATCTTCTAAATACCTACGATGGATTGGTTCCAATTTATACATTTCCAGATACTGGGAAGTTTGGTGCTTCGACTAT
5306	1446	1	1	0	0	NC_001139	857273	857825	NC_001135	163579	163734	|gene note= GO_component: cytosol [goid 0005829] [evidence NAS] |neigh_up CDS[fcd=-1243](-,855269,856306) gene= RNR4 note= Rnr4p; |neigh_down CDS[fcd=743](+,858292,858609) gene= TIM13 note= Tim13p;	|neigh_up CDS[fcd=-593](-,162941,163063) gene= PMP1 note= Pmp1p; |neigh_down CDS[fcd=2679](-,164107,166335) gene= NPP1 note= Npp1p;	CGGTTCCCTTTCTTGCCTGAAATGCTCGTTCTAATGGAAAAAAAAAGAAATAAAGGTGGGCCTGCCCATTAGCAGGAAATTGGTACTTAATTATTGAAAAAAAAATTATTGGTTGCTAAGAGATTCGAACTCTTGCATCTTACGATACCTGAGTATTCCCACAGTTAACTGCGGTCAAGATATTTCTTGAATCAGGCGCCTTAGACCGCTCGGCCAAACAACCACTTATTTGTTGAAAGCGAGCGCGGTACAAGTAATGTTACCTCATCTGATATACAATAAAGGTGGAGCGCCAATATATACGCATTTGACTGTTCATAATTCATTGAATATAATTTATTCCTTGTTAGTACAAAAGGGTTAAACAGAAAAAGACGTGACGTTGTAACCGAGAGGATG…	CGGCTTTCCCAAAAAAGGAATTCCTGTCCAATGCAACGACAGCCATAGAAACAGCCGCGGTTGGGTGCGTGGGTGCGGTAATTTAACGATCATATGGTATGGGTGCACGTGGGATTCTAGGGGAAGTGCGCGCGGATACCGAATCGGCCATCGAA
5306	12113	1	1	0	0	NC_001139	857273	857825	NC_001147	461690	461871	|gene note= GO_component: cytosol [goid 0005829] [evidence NAS] |neigh_up CDS[fcd=-1243](-,855269,856306) gene= RNR4 note= Rnr4p; |neigh_down CDS[fcd=743](+,858292,858609) gene= TIM13 note= Tim13p;	|neigh_up CDS[fcd=-502](-,459482,461278) gene= THI71 note= Thi71p; |neigh_down CDS[fcd=2691](+,464471,464632) note= Yor072w-bp;	CGGTTCCCTTTCTTGCCTGAAATGCTCGTTCTAATGGAAAAAAAAAGAAATAAAGGTGGGCCTGCCCATTAGCAGGAAATTGGTACTTAATTATTGAAAAAAAAATTATTGGTTGCTAAGAGATTCGAACTCTTGCATCTTACGATACCTGAGTATTCCCACAGTTAACTGCGGTCAAGATATTTCTTGAATCAGGCGCCTTAGACCGCTCGGCCAAACAACCACTTATTTGTTGAAAGCGAGCGCGGTACAAGTAATGTTACCTCATCTGATATACAATAAAGGTGGAGCGCCAATATATACGCATTTGACTGTTCATAATTCATTGAATATAATTTATTCCTTGTTAGTACAAAAGGGTTAAACAGAAAAAGACGTGACGTTGTAACCGAGAGGATG…	CGGCGCGGTGTTCGCTCCGAGCACGAAAATTCTGTCGTTTATTCTCTTCCTTCTTCCAGTTCCATTACTTAAAGGAGCTGTTTTATTTCATTCGAAAGCCCGATGACAAATTCTCCTCTTTCATATAAATTAATAAGGCGGTCAGCAGGAAACTCCTATTGCCAACCGTCTTGCGAACCGA
5306	720	3	3	10	10	NC_001139	857273	857825	NC_001134	346930	347517	|gene note= GO_component: cytosol [goid 0005829] [evidence NAS] |neigh_up CDS[fcd=-1243](-,855269,856306) gene= RNR4 note= Rnr4p; |neigh_down CDS[fcd=743](+,858292,858609) gene= TIM13 note= Tim13p;	|gene gene= PRP6 note= synonyms: TSM7269, RNA6 |CDS[fcd=76](-,344600,347299) gene= PRP6 note= Prp6p;	CGGTTCCCTTTCTTGCCTGAAATGCTCGTTCTAATGGAAAAAAAAAGAAATAAAGGTGGGCCTGCCCATTAGCAGGAAATTGGTACTTAATTATTGAAAAAAAAATTATTGGTTGCTAAGAGATTCGAACTCTTGCATCTTACGATACCTGAGTATTCCCACAGTTAACTGCGGTCAAGATATTTCTTGAATCAGGCGCCTTAGACCGCTCGGCCAAACAACCACTTATTTGTTGAAAGCGAGCGCGGTACAAGTAATGTTACCTCATCTGATATACAATAAAGGTGGAGCGCCAATATATACGCATTTGACTGTTCATAATTCATTGAATATAATTTATTCCTTGTTAGTACAAAAGGGTTAAACAGAAAAAGACGTGACGTTGTAACCGAGAGGATG…	CGGAATATCCATCCACTCACTCTCCGTTACAGCAGCTAATGATTCTTTCAAATCGGCAAATTGCCGTTTCACGTTTGAAGAATCAACTGAATTGTCATCATCCTTTTCATTAGCTCTTTTCTTTTTCTTTTGTGCTAATTTCAATTCAAGCGTTTTGAATACATTTGCAGCTTCATCATCTTCATCATCTTTCGGTTGGCTTTGAAGATGGTTGTTCAAATTTTCACGGTACCTTTTCGGTATTCTTCTTCCTTTGTCATCATTACTAACCACTTGCTTTTCTTTTGTTGAAAATCCAGTGGCTCCACGACCAATACCTGGTACGTAACCTGCAGGTGGTTCTTGATCCAAAAAAGATGGCCTCTCCATAAAATGTGACGTTTTCTTGCTGTTAAACTC…
5306	721	165	165	3792	3792	NC_001139	857273	857825	NC_001134	347518	349584	|gene note= GO_component: cytosol [goid 0005829] [evidence NAS] |neigh_up CDS[fcd=-1243](-,855269,856306) gene= RNR4 note= Rnr4p; |neigh_down CDS[fcd=743](+,858292,858609) gene= TIM13 note= Tim13p;	|gene |tRNA note= GO_component: cytosol [goid 0005829] [evidence NAS] |gene |CDS[fcd=-674](+,347877,349382) note= Ybr056wp;	CGGTTCCCTTTCTTGCCTGAAATGCTCGTTCTAATGGAAAAAAAAAGAAATAAAGGTGGGCCTGCCCATTAGCAGGAAATTGGTACTTAATTATTGAAAAAAAAATTATTGGTTGCTAAGAGATTCGAACTCTTGCATCTTACGATACCTGAGTATTCCCACAGTTAACTGCGGTCAAGATATTTCTTGAATCAGGCGCCTTAGACCGCTCGGCCAAACAACCACTTATTTGTTGAAAGCGAGCGCGGTACAAGTAATGTTACCTCATCTGATATACAATAAAGGTGGAGCGCCAATATATACGCATTTGACTGTTCATAATTCATTGAATATAATTTATTCCTTGTTAGTACAAAAGGGTTAAACAGAAAAAGACGTGACGTTGTAACCGAGAGGATG…	CGGAGGAGCTACTAAAGAAAGAGTGCTGCAATTAATACAATTAATATAAGTGTGGTTATTGAAAATAACTATTCATTTATACGGAGGGTTGGCCGAGTGGTCTAAGGCGGCAGACTTAAGATCTGTTGGACGGTTGTCCGCGCGAGTTCGAACCTCGCATCCTTCAGTAATATTTTTTTAATATACATTTTCTCTGCCATCATGGCTTAAAAAATGCTTAAAAGAAGGGAATTAGGGGGGATGGATGAACTAAGACATAACTTTCTTTTCTTCAATTCGAACTCTGTTGGGAAGAGTTGCTTTAAAAAAGACTCTCTATCCATCTATAAAATTTATTAAAACTTTTGAACTGCACAGAATGATTGGCTCACTTAGAAACAAATTTGAGCATTTCAAAGT…
5306	2904	2	2	0	0	NC_001139	857273	857825	NC_001136	1134886	1135319	|gene note= GO_component: cytosol [goid 0005829] [evidence NAS] |neigh_up CDS[fcd=-1243](-,855269,856306) gene= RNR4 note= Rnr4p; |neigh_down CDS[fcd=743](+,858292,858609) gene= TIM13 note= Tim13p;	|gene |CDS[fcd=324](-,1133255,1135426) note= Ydr333cp;	CGGTTCCCTTTCTTGCCTGAAATGCTCGTTCTAATGGAAAAAAAAAGAAATAAAGGTGGGCCTGCCCATTAGCAGGAAATTGGTACTTAATTATTGAAAAAAAAATTATTGGTTGCTAAGAGATTCGAACTCTTGCATCTTACGATACCTGAGTATTCCCACAGTTAACTGCGGTCAAGATATTTCTTGAATCAGGCGCCTTAGACCGCTCGGCCAAACAACCACTTATTTGTTGAAAGCGAGCGCGGTACAAGTAATGTTACCTCATCTGATATACAATAAAGGTGGAGCGCCAATATATACGCATTTGACTGTTCATAATTCATTGAATATAATTTATTCCTTGTTAGTACAAAAGGGTTAAACAGAAAAAGACGTGACGTTGTAACCGAGAGGATG…	CGGATCACTTTCTAAGCTTAAAAATGACTTCCAAGGTTGGCTAGATGCTTCCTCTGGTTCAGATGCCGTGAAGAAACCTTCCTCATTAGTGTCATCATTTTTAGTCTTACCGTACTTCAATATATCAGTTTTTTTGAACTGTTGGATAATCTTGTCGAATTCTTCATCATCATCATCATCATCGGAACCCTTGTCTTTTGCAGCCTCGGCGGTATGGTTTTTTTGCTTCCTTTTTGCCTTTTTATTCTTTTTCCTTCTAGAAGACTTGGATGCTAGTGTAATTCTTTTAGGTTGACCATTACTTTGAGTATCACGCTCCCCAGCAGCAGCAGCTTCTTCATCCTGCTCAGACATTTGTCCTTCATCAGTGCTATTATCTGAATCACGTACGTTATTCAT…
5306	9951	7	7	0	0	NC_001139	857273	857825	NC_001145	306663	307118	|gene note= GO_component: cytosol [goid 0005829] [evidence NAS] |neigh_up CDS[fcd=-1243](-,855269,856306) gene= RNR4 note= Rnr4p; |neigh_down CDS[fcd=743](+,858292,858609) gene= TIM13 note= Tim13p;	|neigh_up CDS[fcd=-1298](-,303235,305592) gene= SOK2 note= Sok2p; |neigh_down CDS[fcd=598](+,307488,308681) gene= SPO20 note= Spo20p;	CGGTTCCCTTTCTTGCCTGAAATGCTCGTTCTAATGGAAAAAAAAAGAAATAAAGGTGGGCCTGCCCATTAGCAGGAAATTGGTACTTAATTATTGAAAAAAAAATTATTGGTTGCTAAGAGATTCGAACTCTTGCATCTTACGATACCTGAGTATTCCCACAGTTAACTGCGGTCAAGATATTTCTTGAATCAGGCGCCTTAGACCGCTCGGCCAAACAACCACTTATTTGTTGAAAGCGAGCGCGGTACAAGTAATGTTACCTCATCTGATATACAATAAAGGTGGAGCGCCAATATATACGCATTTGACTGTTCATAATTCATTGAATATAATTTATTCCTTGTTAGTACAAAAGGGTTAAACAGAAAAAGACGTGACGTTGTAACCGAGAGGATG…	CGGAATTTCGCGCTTGGTGTGCTTTCGCATCTTTTCGTGTGGTGAATGCACCTGGTGCACGCTGCGAAGGTGACGTAGCAATCCAAAAAAGGGAAGTCTAGGCGCTTTCAACCGCCCCCCACCGTGCATGCGGATTGGTTGTCACAATTCGCAGACATATTGGCAATGTTTCCTCCCCTCCTGTTGATGCGGGTAAGGGGTGTCTGTTATGCAGGAACAGGAAGGTAAAAATTAAATGGGCCTTAATTCTGTAGACACTCTCTTGGGGTAATAAGGTTAAAAGCCATTGTTGAAGTACGGAATCATCTCTTCATTTTTTCAGCGCTTGTAAGGAATTAATCCCCAGGAAGGTGCCGATGTAATGAGAGAAGTATTCTTGTTGTATCTCTTTGGTTCGGA…
5306	2236	0	1	0	0	NC_001139	857273	857825	NC_001136	518981	519229	|gene note= GO_component: cytosol [goid 0005829] [evidence NAS] |neigh_up CDS[fcd=-1243](-,855269,856306) gene= RNR4 note= Rnr4p; |neigh_down CDS[fcd=743](+,858292,858609) gene= TIM13 note= Tim13p;	|repeat_region note= Transposon YDRCTY2-1; Long Terminal Repeat (LTR) |gene note= Ydr034c-dp; |gene |CDS[fcd=248](-,518037,519353) note= Ydr034c-cp;	CGGTTCCCTTTCTTGCCTGAAATGCTCGTTCTAATGGAAAAAAAAAGAAATAAAGGTGGGCCTGCCCATTAGCAGGAAATTGGTACTTAATTATTGAAAAAAAAATTATTGGTTGCTAAGAGATTCGAACTCTTGCATCTTACGATACCTGAGTATTCCCACAGTTAACTGCGGTCAAGATATTTCTTGAATCAGGCGCCTTAGACCGCTCGGCCAAACAACCACTTATTTGTTGAAAGCGAGCGCGGTACAAGTAATGTTACCTCATCTGATATACAATAAAGGTGGAGCGCCAATATATACGCATTTGACTGTTCATAATTCATTGAATATAATTTATTCCTTGTTAGTACAAAAGGGTTAAACAGAAAAAGACGTGACGTTGTAACCGAGAGGATG…	CGGTTGATAATACGCAGGTGACGTTTGATAATGTGAACACGTCATCATAGATGGTTGTTGGTAATGTGCCCAGTTAGAGGCCATAGCTTTGTTTGGGGTCATCATGCCGTGCTGTTGGTACTGTCCATTCTGTGGAGGTGGTACTGAAGCAGGTTGAGGAGAGACATGATGATGGTTCTCTGGAACAGCTGATGTCCCAGGTGTTGTCTCTTGTTGAGAATTAACCTTAGTGGAATCTCTATCAAATT
5306	2700	0	108	0	730	NC_001139	857273	857825	NC_001136	945976	946388	|gene note= GO_component: cytosol [goid 0005829] [evidence NAS] |neigh_up CDS[fcd=-1243](-,855269,856306) gene= RNR4 note= Rnr4p; |neigh_down CDS[fcd=743](+,858292,858609) gene= TIM13 note= Tim13p;	|LTR note= YDRCSIGMA3 |gene gene= SUP2 gene= SUP2 note= GO_component: cytosol [goid 0005829] [evidence NAS] |neigh_up CDS[fcd=-1034](-,943670,945148) gene= SNU56 note= Snu56p; |neigh_down CDS[fcd=621](+,946803,948452) gene= AMD2 note= Amd2p;	CGGTTCCCTTTCTTGCCTGAAATGCTCGTTCTAATGGAAAAAAAAAGAAATAAAGGTGGGCCTGCCCATTAGCAGGAAATTGGTACTTAATTATTGAAAAAAAAATTATTGGTTGCTAAGAGATTCGAACTCTTGCATCTTACGATACCTGAGTATTCCCACAGTTAACTGCGGTCAAGATATTTCTTGAATCAGGCGCCTTAGACCGCTCGGCCAAACAACCACTTATTTGTTGAAAGCGAGCGCGGTACAAGTAATGTTACCTCATCTGATATACAATAAAGGTGGAGCGCCAATATATACGCATTTGACTGTTCATAATTCATTGAATATAATTTATTCCTTGTTAGTACAAAAGGGTTAAACAGAAAAAGACGTGACGTTGTAACCGAGAGGATG…	CGGAGTGTTTTGACAATCCTAATATAAACAGTCTTAGGGAAGTAACCAGTTGTCAAAACAGTTTATCAGATTAATTCACGGAATGTTACTTATCTTATATATTATATAAAATATGAATCATACTAAGTGGTGGAAGCGCGGAATCTCGGATCTAAACTAATTGTTCAGGCATTTATACTTTTGGGTAGTTCAGCTAGGGAAGGACGGGTTTTGTCTCATGTTGTTCGTTTTGTTATAAGGTTGTTTCATATGTGTTTTATGAACGTTTAGGATGACGTATTGTCATACTGACGTATCTCATTTTGAGATACAACACCTCGCAAGAAATCGACTCTCGGTAGCCAAGTTGGTTTAAGGCGCAAGACTGTAATTTATCACTACGAAATCTTGAGATCGGGC…
5306	3781	0	2	0	0	NC_001139	857273	857825	NC_001137	363580	363621	|gene note= GO_component: cytosol [goid 0005829] [evidence NAS] |neigh_up CDS[fcd=-1243](-,855269,856306) gene= RNR4 note= Rnr4p; |neigh_down CDS[fcd=743](+,858292,858609) gene= TIM13 note= Tim13p;	|gene gene= RPS8B |CDS[fcd=-504](+,363096,363698) gene= RPS8B note= Rps8bp;	CGGTTCCCTTTCTTGCCTGAAATGCTCGTTCTAATGGAAAAAAAAAGAAATAAAGGTGGGCCTGCCCATTAGCAGGAAATTGGTACTTAATTATTGAAAAAAAAATTATTGGTTGCTAAGAGATTCGAACTCTTGCATCTTACGATACCTGAGTATTCCCACAGTTAACTGCGGTCAAGATATTTCTTGAATCAGGCGCCTTAGACCGCTCGGCCAAACAACCACTTATTTGTTGAAAGCGAGCGCGGTACAAGTAATGTTACCTCATCTGATATACAATAAAGGTGGAGCGCCAATATATACGCATTTGACTGTTCATAATTCATTGAATATAATTTATTCCTTGTTAGTACAAAAGGGTTAAACAGAAAAAGACGTGACGTTGTAACCGAGAGGATG…	CGGTAGATTATACGCTTGTATCTCTTCCAGACCAGGTCAAT
5306	4905	0	2	0	0	NC_001139	857273	857825	NC_001139	482262	482462	|gene note= GO_component: cytosol [goid 0005829] [evidence NAS] |neigh_up CDS[fcd=-1243](-,855269,856306) gene= RNR4 note= Rnr4p; |neigh_down CDS[fcd=743](+,858292,858609) gene= TIM13 note= Tim13p;	|gene gene= PMA1 |CDS[fcd=309](-,479915,482671) gene= PMA1 note= Pma1p;	CGGTTCCCTTTCTTGCCTGAAATGCTCGTTCTAATGGAAAAAAAAAGAAATAAAGGTGGGCCTGCCCATTAGCAGGAAATTGGTACTTAATTATTGAAAAAAAAATTATTGGTTGCTAAGAGATTCGAACTCTTGCATCTTACGATACCTGAGTATTCCCACAGTTAACTGCGGTCAAGATATTTCTTGAATCAGGCGCCTTAGACCGCTCGGCCAAACAACCACTTATTTGTTGAAAGCGAGCGCGGTACAAGTAATGTTACCTCATCTGATATACAATAAAGGTGGAGCGCCAATATATACGCATTTGACTGTTCATAATTCATTGAATATAATTTATTCCTTGTTAGTACAAAAGGGTTAAACAGAAAAAGACGTGACGTTGTAACCGAGAGGATG…	CGGCAGCCAAAATAGCAGCGGCTTCCATAACGAATTGAATTGGACCGACGAAAAACATAACGAACTTAACGACTAAAGATTCTTTTTCGTCAGCCATTTGATTCAAACCGTACTTCTTTCTTCTTTTCAAAACTTCATCGGAAGTTAAACCGTAAGATGGGTCAGTTTGTAAATATTCTTCTGGAACTGGTCTAGCTTCA
5306	11914	0	101	0	776	NC_001139	857273	857825	NC_001147	287485	288273	|gene note= GO_component: cytosol [goid 0005829] [evidence NAS] |neigh_up CDS[fcd=-1243](-,855269,856306) gene= RNR4 note= Rnr4p; |neigh_down CDS[fcd=743](+,858292,858609) gene= TIM13 note= Tim13p;	|gene gene= TAT2 note= synonyms: TAP2, SCM2, SAB2, LTG3 |CDS[fcd=-1706](+,286173,287951) gene= TAT2 note= Tat2p; |gene gene= SUP3 gene= SUP3 note= GO_component: cytosol [goid 0005829] [evidence NAS]	CGGTTCCCTTTCTTGCCTGAAATGCTCGTTCTAATGGAAAAAAAAAGAAATAAAGGTGGGCCTGCCCATTAGCAGGAAATTGGTACTTAATTATTGAAAAAAAAATTATTGGTTGCTAAGAGATTCGAACTCTTGCATCTTACGATACCTGAGTATTCCCACAGTTAACTGCGGTCAAGATATTTCTTGAATCAGGCGCCTTAGACCGCTCGGCCAAACAACCACTTATTTGTTGAAAGCGAGCGCGGTACAAGTAATGTTACCTCATCTGATATACAATAAAGGTGGAGCGCCAATATATACGCATTTGACTGTTCATAATTCATTGAATATAATTTATTCCTTGTTAGTACAAAAGGGTTAAACAGAAAAAGACGTGACGTTGTAACCGAGAGGATG…	CGGCCTGGCCACGTGCATTGTCTGGTTGAGCATCAACCTGTCACATATCAGATTTAGACTGGCGATGAAGGCTCAAGGGAAGTCTCTGGATGAATTAGAATTTGTTAGTGCTGTCGGGATTTGGGGATCAGCGTATTCCGCTTTAATCAACTGTCTAATCTTGATAGCTCAATTCTATTGTTCACTATGGCCCATTGGTGGCTGGACCAGCGGCAAAGAAAGGGCTAAAATATTTTTTCAAAATTATCTGTGTGCCTTAATCATGTTATTTATATTCATCGTCCACAAAATTTATTACAAGTGTCAAACAGGCAAATGGTGGGGGGTTAAGGCGTTAAAGGACATAGATTTGGAAACCGATCGTAAAGATATCGACATCGAAATAGTCAAGCAAGAAAT…
5306	7104	0	1	0	8	NC_001139	857273	857825	NC_001142	338891	338944	|gene note= GO_component: cytosol [goid 0005829] [evidence NAS] |neigh_up CDS[fcd=-1243](-,855269,856306) gene= RNR4 note= Rnr4p; |neigh_down CDS[fcd=743](+,858292,858609) gene= TIM13 note= Tim13p;	|gene gene= TDH1 note= synonym: GLD3 |CDS[fcd=-651](+,338266,339264) gene= TDH1 note= Tdh1p;	CGGTTCCCTTTCTTGCCTGAAATGCTCGTTCTAATGGAAAAAAAAAGAAATAAAGGTGGGCCTGCCCATTAGCAGGAAATTGGTACTTAATTATTGAAAAAAAAATTATTGGTTGCTAAGAGATTCGAACTCTTGCATCTTACGATACCTGAGTATTCCCACAGTTAACTGCGGTCAAGATATTTCTTGAATCAGGCGCCTTAGACCGCTCGGCCAAACAACCACTTATTTGTTGAAAGCGAGCGCGGTACAAGTAATGTTACCTCATCTGATATACAATAAAGGTGGAGCGCCAATATATACGCATTTGACTGTTCATAATTCATTGAATATAATTTATTCCTTGTTAGTACAAAAGGGTTAAACAGAAAAAGACGTGACGTTGTAACCGAGAGGATG…	CGGTGCTGCTAAGGCTGTCGGTAAGGTCTTGCCAGAATTGCAAGGTAAGTTGA
5306	3208	0	1	0	0	NC_001139	857273	857825	NC_001136	1410878	1412767	|gene note= GO_component: cytosol [goid 0005829] [evidence NAS] |neigh_up CDS[fcd=-1243](-,855269,856306) gene= RNR4 note= Rnr4p; |neigh_down CDS[fcd=743](+,858292,858609) gene= TIM13 note= Tim13p;	|gene |CDS(-,1410445,1411119) note= Ydr476cp; |gene gene= SNF1 note= synonyms: PAS14, HAF3, GLC2, CCR1, CAT1 |CDS(+,1412365,1414266) gene= SNF1 note= Snf1p;	CGGTTCCCTTTCTTGCCTGAAATGCTCGTTCTAATGGAAAAAAAAAGAAATAAAGGTGGGCCTGCCCATTAGCAGGAAATTGGTACTTAATTATTGAAAAAAAAATTATTGGTTGCTAAGAGATTCGAACTCTTGCATCTTACGATACCTGAGTATTCCCACAGTTAACTGCGGTCAAGATATTTCTTGAATCAGGCGCCTTAGACCGCTCGGCCAAACAACCACTTATTTGTTGAAAGCGAGCGCGGTACAAGTAATGTTACCTCATCTGATATACAATAAAGGTGGAGCGCCAATATATACGCATTTGACTGTTCATAATTCATTGAATATAATTTATTCCTTGTTAGTACAAAAGGGTTAAACAGAAAAAGACGTGACGTTGTAACCGAGAGGATG…	CGGTAGCAGTGCGGGTATCGTTGCCCGTGTCATTGTCAATGAAGTAGATAATCTTCTCGATGTTCTGACCCGTTTCTGTGTGAAGGAACTTGAGCGTAAACGTGGACGTCTGCGTGTCGATCTCTGTCAGTCTGACATGCTTGACGGCCTTGGTAATGGGAACGTGGCCAAAAACGGCGAGACAATCCTCCAGCCCCAACTTGTGCGTATCGTTGATGCTTACAATTAACGAATCCCACATACTTGTGTATACCCGTATACTTGCTTGAGTTGATAGAACGCACGCTCTCGCCGATATAAGCCTCCACTCTTTATATATACCATATCCAAATAGGTGTGCACTTTGTGGCAAGGAGTAATTATAAACGAACAGAATATCCCGACCACATGGCAAGACCA…
5306	7121	0	201	0	1953	NC_001139	857273	857825	NC_001142	353675	354319	|gene note= GO_component: cytosol [goid 0005829] [evidence NAS] |neigh_up CDS[fcd=-1243](-,855269,856306) gene= RNR4 note= Rnr4p; |neigh_down CDS[fcd=743](+,858292,858609) gene= TIM13 note= Tim13p;	|gene gene= SUP7 gene= SUP7 note= GO_component: cytosol [goid 0005829] [evidence NAS] |neigh_up CDS[fcd=-1616](+,352381,353610) gene= AIM22 note= Aim22p; |neigh_down CDS[fcd=2022](+,356019,357923) note= Yjl045wp;	CGGTTCCCTTTCTTGCCTGAAATGCTCGTTCTAATGGAAAAAAAAAGAAATAAAGGTGGGCCTGCCCATTAGCAGGAAATTGGTACTTAATTATTGAAAAAAAAATTATTGGTTGCTAAGAGATTCGAACTCTTGCATCTTACGATACCTGAGTATTCCCACAGTTAACTGCGGTCAAGATATTTCTTGAATCAGGCGCCTTAGACCGCTCGGCCAAACAACCACTTATTTGTTGAAAGCGAGCGCGGTACAAGTAATGTTACCTCATCTGATATACAATAAAGGTGGAGCGCCAATATATACGCATTTGACTGTTCATAATTCATTGAATATAATTTATTCCTTGTTAGTACAAAAGGGTTAAACAGAAAAAGACGTGACGTTGTAACCGAGAGGATG…	CGGAAACTGATTCAGCATATTTCAGCAGACGCGTCCTAGATTCACAGCAAACTTCAATATAAGCGATACATTAGGAGTGTTCGTACTTTAGATCTATAAGAACTATATTTTGTTACGATTCAGCCGTCTCTAAATGTGAACTAAATATTTATACTGTTATTTGAGAAACCGACAGATAGTACTTAATTTTATCGATCATCTAAGAATAGCATCGGTATTGTGGTGACATTTATTGAATTTCTTCCGCTCCAGAATAAAGTTCCTTTTCACTTCAAAAAACTGCCACCAGTAAAGTTGCACCAGTGGTTTTTGAGCATTTTTTGTCAATGTCGCTTAACCGTTCTTGAACTGTATCCTCTTGACGTCGATAAAATCATTTGTAAAAACCAGGCCAAATCA…
5306	13107	0	1	0	0	NC_001139	857273	857825	NC_001148	260375	261317	|gene note= GO_component: cytosol [goid 0005829] [evidence NAS] |neigh_up CDS[fcd=-1243](-,855269,856306) gene= RNR4 note= Rnr4p; |neigh_down CDS[fcd=743](+,858292,858609) gene= TIM13 note= Tim13p;	|gene gene= PEP4 note= synonyms: yscA, PRA1, PHO9 |CDS[fcd=84](-,259713,260930) gene= PEP4 note= Pep4p;	CGGTTCCCTTTCTTGCCTGAAATGCTCGTTCTAATGGAAAAAAAAAGAAATAAAGGTGGGCCTGCCCATTAGCAGGAAATTGGTACTTAATTATTGAAAAAAAAATTATTGGTTGCTAAGAGATTCGAACTCTTGCATCTTACGATACCTGAGTATTCCCACAGTTAACTGCGGTCAAGATATTTCTTGAATCAGGCGCCTTAGACCGCTCGGCCAAACAACCACTTATTTGTTGAAAGCGAGCGCGGTACAAGTAATGTTACCTCATCTGATATACAATAAAGGTGGAGCGCCAATATATACGCATTTGACTGTTCATAATTCATTGAATATAATTTATTCCTTGTTAGTACAAAAGGGTTAAACAGAAAAAGACGTGACGTTGTAACCGAGAGGATG…	CGGCTCGCTGGTAGCCTCAGCGAAGTCTTGTTTTGGAATGGTCAAATCCCCGATGGACAAAGTGTCTTGAGAAATGTAACCTTCCAAAGAACCAGTACCATATTGAATGGCAAATTCAGTACCATTAGCTTTGTAGCTTGATGAAGCTTCATGATCGTATTTAGAATGTAGGAAACAAGCCAAGGAACCACATTCGTTACTTGGAACCCAAAGGTTTGAAGAACCAGTATCCAAAATAACCTTGAAGTTTTGAGGTGGAGTACCCAAAGTAATGTCAGTGTAATATTGTGCGTTCAAGTAATTTGTCAATGGAACATCGTGACCACCTTCAGTGAAGAAAGGATGCTCCCTAGAAAAAACAACTTCGGGGTTAGCTTTCTCAAATTGAGTCAAGTACTT…
5306	3245	0	4	0	0	NC_001139	857273	857825	NC_001136	1453702	1453746	|gene note= GO_component: cytosol [goid 0005829] [evidence NAS] |neigh_up CDS[fcd=-1243](-,855269,856306) gene= RNR4 note= Rnr4p; |neigh_down CDS[fcd=743](+,858292,858609) gene= TIM13 note= Tim13p;	|gene gene= SAM2 note= synonym: ETH2 |CDS[fcd=732](-,1453302,1454456) gene= SAM2 note= Sam2p;	CGGTTCCCTTTCTTGCCTGAAATGCTCGTTCTAATGGAAAAAAAAAGAAATAAAGGTGGGCCTGCCCATTAGCAGGAAATTGGTACTTAATTATTGAAAAAAAAATTATTGGTTGCTAAGAGATTCGAACTCTTGCATCTTACGATACCTGAGTATTCCCACAGTTAACTGCGGTCAAGATATTTCTTGAATCAGGCGCCTTAGACCGCTCGGCCAAACAACCACTTATTTGTTGAAAGCGAGCGCGGTACAAGTAATGTTACCTCATCTGATATACAATAAAGGTGGAGCGCCAATATATACGCATTTGACTGTTCATAATTCATTGAATATAATTTATTCCTTGTTAGTACAAAAGGGTTAAACAGAAAAAGACGTGACGTTGTAACCGAGAGGATG…	CGGTCAAACCAGCGTCACCTTGAGGACCACCGATGACGAATCTA
5306	9813	0	210	0	1976	NC_001139	857273	857825	NC_001145	168324	168875	|gene note= GO_component: cytosol [goid 0005829] [evidence NAS] |neigh_up CDS[fcd=-1243](-,855269,856306) gene= RNR4 note= Rnr4p; |neigh_down CDS[fcd=743](+,858292,858609) gene= TIM13 note= Tim13p;	|LTR note= YMLCDELTA2 |gene gene= SUP5 gene= SUP5 note= GO_component: cytosol [goid 0005829] [evidence NAS] |neigh_up CDS[fcd=-818](-,167623,167781) note= Yml054c-ap; |neigh_down CDS[fcd=1155](-,169116,169754) note= Yml053cp;	CGGTTCCCTTTCTTGCCTGAAATGCTCGTTCTAATGGAAAAAAAAAGAAATAAAGGTGGGCCTGCCCATTAGCAGGAAATTGGTACTTAATTATTGAAAAAAAAATTATTGGTTGCTAAGAGATTCGAACTCTTGCATCTTACGATACCTGAGTATTCCCACAGTTAACTGCGGTCAAGATATTTCTTGAATCAGGCGCCTTAGACCGCTCGGCCAAACAACCACTTATTTGTTGAAAGCGAGCGCGGTACAAGTAATGTTACCTCATCTGATATACAATAAAGGTGGAGCGCCAATATATACGCATTTGACTGTTCATAATTCATTGAATATAATTTATTCCTTGTTAGTACAAAAGGGTTAAACAGAAAAAGACGTGACGTTGTAACCGAGAGGATG…	CGGATTTATTTCGTAAATTCTTATTGAAGAATGGGTGAATTTTGAGATAATCGTTGGGATTCCATTTTTAATAAGGCAATAATATTAGGTATGTAGAATGTACTAGAAGTTCTCCTCGAGGATTTAGGAATCCATAAAAGGGAATCTGCAATTCTACACAATTCTATAAATATTATTATCATCATTTTATATGTTAATATTCATTGATCCTATTACATTATCAATCCTTGCGTTTCAGCTTCCACTAATTTAGATGACTATTTCTCATCATTTGCGTCATCTTCTAACACCGTATATGATAATATACTAGTAACGTAAATACTAGTTAGTAGATGATAGTTGATTTTTATTCCAACACTTATATTCTATATATCCATAACATTGTCTACATATAATCCG…
5306	8898	0	1	0	4	NC_001139	857273	857825	NC_001144	467775	468433	|gene note= GO_component: cytosol [goid 0005829] [evidence NAS] |neigh_up CDS[fcd=-1243](-,855269,856306) gene= RNR4 note= Rnr4p; |neigh_down CDS[fcd=743](+,858292,858609) gene= TIM13 note= Tim13p;	|rRNA |rep_origin note= ARS1200-2 |neigh_up CDS[fcd=-5432](-,462523,462672) note= Ylr154c-gp; |neigh_down CDS[fcd=855](-,468828,468959) note= Ylr154c-hp;	CGGTTCCCTTTCTTGCCTGAAATGCTCGTTCTAATGGAAAAAAAAAGAAATAAAGGTGGGCCTGCCCATTAGCAGGAAATTGGTACTTAATTATTGAAAAAAAAATTATTGGTTGCTAAGAGATTCGAACTCTTGCATCTTACGATACCTGAGTATTCCCACAGTTAACTGCGGTCAAGATATTTCTTGAATCAGGCGCCTTAGACCGCTCGGCCAAACAACCACTTATTTGTTGAAAGCGAGCGCGGTACAAGTAATGTTACCTCATCTGATATACAATAAAGGTGGAGCGCCAATATATACGCATTTGACTGTTCATAATTCATTGAATATAATTTATTCCTTGTTAGTACAAAAGGGTTAAACAGAAAAAGACGTGACGTTGTAACCGAGAGGATG…	CGGGTAACCCAGTTCCTCACTATTTTTTACTGCGGAAGCGGAAGCGGAAAATACGGAAACGCGCGGGAACATACAAAACATACAAAATATACCTTTCTCACACAAGAAATATATGCTACTTGCAAAATATCATACCAAAAAACTTTTCACAACCGAAACCAAAACCAACGGATATCATACATTACACTACCACCATTCAAACTTTACTACTATCCTCCCTTCAGTTTCCCTTTTTCTGCCTTTTTCGGTGACGGAAATACGCTTCAGAGACCCTAAAGGGAAATCCATGCCATAACAGGAAAGTAACATCCCAATGCGGACTATACCACCCCACCACACTCCTACCAATAACGGTAACTATTCTATGTTTTCTTACTCCTATGTCTATTCATCTTTCAT…
5306	8897	0	6	0	4	NC_001139	857273	857825	NC_001144	467213	467774	|gene note= GO_component: cytosol [goid 0005829] [evidence NAS] |neigh_up CDS[fcd=-1243](-,855269,856306) gene= RNR4 note= Rnr4p; |neigh_down CDS[fcd=743](+,858292,858609) gene= TIM13 note= Tim13p;	|rRNA |rRNA |rRNA |neigh_up CDS[fcd=-4821](-,462523,462672) note= Ylr154c-gp; |neigh_down CDS[fcd=1466](-,468828,468959) note= Ylr154c-hp;	CGGTTCCCTTTCTTGCCTGAAATGCTCGTTCTAATGGAAAAAAAAAGAAATAAAGGTGGGCCTGCCCATTAGCAGGAAATTGGTACTTAATTATTGAAAAAAAAATTATTGGTTGCTAAGAGATTCGAACTCTTGCATCTTACGATACCTGAGTATTCCCACAGTTAACTGCGGTCAAGATATTTCTTGAATCAGGCGCCTTAGACCGCTCGGCCAAACAACCACTTATTTGTTGAAAGCGAGCGCGGTACAAGTAATGTTACCTCATCTGATATACAATAAAGGTGGAGCGCCAATATATACGCATTTGACTGTTCATAATTCATTGAATATAATTTATTCCTTGTTAGTACAAAAGGGTTAAACAGAAAAAGACGTGACGTTGTAACCGAGAGGATG…	CGGCTATTCAACAAGGCATTCCCCCAAGTTTGAATTCTTTGAAATAGATTGCTATTAGCTAGTAATCCACCAAATCCTTCGCTGCTCACCAATGGAATCGCAAGATGCCCACGATGAGACTGTTCAGGTTAAACGCAAAAGAAACACACTCTGGGAATTTCTTCCCAAATTGTATCTCTCAATACGCATCAACCCATGTCAATTAAACACGCTGTATAGAGACTAGGCAGATCTGACGATCACCTAGCGACTCTCTCCACCGTTTGACGAGGCCATTTACAAAAACATAACGAACGACAAGCCTACTCGAATTCGTTTCCAAACTCTTTTCGAACTTGTCTTCAACTGCTTTCGCATGAAGTACCTCCCAACTACTTTTCCTCACACTTGTACTCCATG…
5306	8896	0	177	0	46	NC_001139	857273	857825	NC_001144	467136	467212	|gene note= GO_component: cytosol [goid 0005829] [evidence NAS] |neigh_up CDS[fcd=-1243](-,855269,856306) gene= RNR4 note= Rnr4p; |neigh_down CDS[fcd=743](+,858292,858609) gene= TIM13 note= Tim13p;	|rRNA |rRNA |neigh_up CDS[fcd=-4502](-,462523,462672) note= Ylr154c-gp; |neigh_down CDS[fcd=1785](-,468828,468959) note= Ylr154c-hp;	CGGTTCCCTTTCTTGCCTGAAATGCTCGTTCTAATGGAAAAAAAAAGAAATAAAGGTGGGCCTGCCCATTAGCAGGAAATTGGTACTTAATTATTGAAAAAAAAATTATTGGTTGCTAAGAGATTCGAACTCTTGCATCTTACGATACCTGAGTATTCCCACAGTTAACTGCGGTCAAGATATTTCTTGAATCAGGCGCCTTAGACCGCTCGGCCAAACAACCACTTATTTGTTGAAAGCGAGCGCGGTACAAGTAATGTTACCTCATCTGATATACAATAAAGGTGGAGCGCCAATATATACGCATTTGACTGTTCATAATTCATTGAATATAATTTATTCCTTGTTAGTACAAAAGGGTTAAACAGAAAAAGACGTGACGTTGTAACCGAGAGGATG…	CGGTGTTTCACGGAATGGTACGTTTGATATCGCTGATTTGAGAGGAGGTTACACTTGAAGAATCACAGTCTTGCGA
5306	5583	0	148	0	4	NC_001139	857273	857825	NC_001140	0	73	|gene note= GO_component: cytosol [goid 0005829] [evidence NAS] |neigh_up CDS[fcd=-1243](-,855269,856306) gene= RNR4 note= Rnr4p; |neigh_down CDS[fcd=743](+,858292,858609) gene= TIM13 note= Tim13p;	|repeat_region gene= TEL08L note= Telomeric region on the left arm of Chromosome |repeat_region gene= TEL08L-TR note= Terminal stretch of telomeric repeats on the left |repeat_region gene= TEL08L-YP note= Telomeric short Y' element on the left arm of |neigh_up NC_001140-start |neigh_down CDS[fcd=4504](-,3725,4540) note= Yhl049cp;	CGGTTCCCTTTCTTGCCTGAAATGCTCGTTCTAATGGAAAAAAAAAGAAATAAAGGTGGGCCTGCCCATTAGCAGGAAATTGGTACTTAATTATTGAAAAAAAAATTATTGGTTGCTAAGAGATTCGAACTCTTGCATCTTACGATACCTGAGTATTCCCACAGTTAACTGCGGTCAAGATATTTCTTGAATCAGGCGCCTTAGACCGCTCGGCCAAACAACCACTTATTTGTTGAAAGCGAGCGCGGTACAAGTAATGTTACCTCATCTGATATACAATAAAGGTGGAGCGCCAATATATACGCATTTGACTGTTCATAATTCATTGAATATAATTTATTCCTTGTTAGTACAAAAGGGTTAAACAGAAAAAGACGTGACGTTGTAACCGAGAGGATG…	CCCACACACACCACACCCACACACCACACCCACACTTTTCACATCTACCTCTACTCTCGCTGTCACTCCTTAC
5306	8878	0	8	0	19	NC_001139	857273	857825	NC_001144	460813	460885	|gene note= GO_component: cytosol [goid 0005829] [evidence NAS] |neigh_up CDS[fcd=-1243](-,855269,856306) gene= RNR4 note= Rnr4p; |neigh_down CDS[fcd=743](+,858292,858609) gene= TIM13 note= Tim13p;	|rRNA |rRNA |neigh_up CDS[fcd=-6152](+,454697,455071) gene= TAR1 note= Tar1p; |neigh_down CDS[fcd=1823](-,462523,462672) note= Ylr154c-gp;	CGGTTCCCTTTCTTGCCTGAAATGCTCGTTCTAATGGAAAAAAAAAGAAATAAAGGTGGGCCTGCCCATTAGCAGGAAATTGGTACTTAATTATTGAAAAAAAAATTATTGGTTGCTAAGAGATTCGAACTCTTGCATCTTACGATACCTGAGTATTCCCACAGTTAACTGCGGTCAAGATATTTCTTGAATCAGGCGCCTTAGACCGCTCGGCCAAACAACCACTTATTTGTTGAAAGCGAGCGCGGTACAAGTAATGTTACCTCATCTGATATACAATAAAGGTGGAGCGCCAATATATACGCATTTGACTGTTCATAATTCATTGAATATAATTTATTCCTTGTTAGTACAAAAGGGTTAAACAGAAAAAGACGTGACGTTGTAACCGAGAGGATG…	CGGATCATAGAATTCTTAAGACAAATAAAATTTATAGAGACTTGTTCAGTCTACTTCTCTCTAAACTAGGCC
5306	8873	0	3	0	4	NC_001139	857273	857825	NC_001144	458076	458637	|gene note= GO_component: cytosol [goid 0005829] [evidence NAS] |neigh_up CDS[fcd=-1243](-,855269,856306) gene= RNR4 note= Rnr4p; |neigh_down CDS[fcd=743](+,858292,858609) gene= TIM13 note= Tim13p;	|rRNA |rRNA |rRNA |neigh_up CDS[fcd=-3659](+,454697,455071) gene= TAR1 note= Tar1p; |neigh_down CDS[fcd=4316](-,462523,462672) note= Ylr154c-gp;	CGGTTCCCTTTCTTGCCTGAAATGCTCGTTCTAATGGAAAAAAAAAGAAATAAAGGTGGGCCTGCCCATTAGCAGGAAATTGGTACTTAATTATTGAAAAAAAAATTATTGGTTGCTAAGAGATTCGAACTCTTGCATCTTACGATACCTGAGTATTCCCACAGTTAACTGCGGTCAAGATATTTCTTGAATCAGGCGCCTTAGACCGCTCGGCCAAACAACCACTTATTTGTTGAAAGCGAGCGCGGTACAAGTAATGTTACCTCATCTGATATACAATAAAGGTGGAGCGCCAATATATACGCATTTGACTGTTCATAATTCATTGAATATAATTTATTCCTTGTTAGTACAAAAGGGTTAAACAGAAAAAGACGTGACGTTGTAACCGAGAGGATG…	CGGCTATTCAACAAGGCATTCCCCCAAGTTTGAATTCTTTGAAATAGATTGCTATTAGCTAGTAATCCACCAAATCCTTCGCTGCTCACCAATGGAATCGCAAGATGCCCACGATGAGACTGTTCAGGTTAAACGCAAAAGAAACACACTCTGGGAATTTCTTCCCAAATTGTATCTCTCAATACGCATCAACCCATGTCAATTAAACACGCTGTATAGAGACTAGGCAGATCTGACGATCACCTAGCGACTCTCTCCACCGTTTGACGAGGCCATTTACAAAAACATAACGAACGACAAGCCTACTCGAATTCGTTTCCAAACTCTTTTCGAACTTGTCTTCAACTGCTTTCGCATGAAGTACCTCCCAACTACTTTTCCTCACACTTGTACTCCATG…
5306	8872	0	142	0	42	NC_001139	857273	857825	NC_001144	457999	458075	|gene note= GO_component: cytosol [goid 0005829] [evidence NAS] |neigh_up CDS[fcd=-1243](-,855269,856306) gene= RNR4 note= Rnr4p; |neigh_down CDS[fcd=743](+,858292,858609) gene= TIM13 note= Tim13p;	|rRNA |rRNA |neigh_up CDS[fcd=-3340](+,454697,455071) gene= TAR1 note= Tar1p; |neigh_down CDS[fcd=4635](-,462523,462672) note= Ylr154c-gp;	CGGTTCCCTTTCTTGCCTGAAATGCTCGTTCTAATGGAAAAAAAAAGAAATAAAGGTGGGCCTGCCCATTAGCAGGAAATTGGTACTTAATTATTGAAAAAAAAATTATTGGTTGCTAAGAGATTCGAACTCTTGCATCTTACGATACCTGAGTATTCCCACAGTTAACTGCGGTCAAGATATTTCTTGAATCAGGCGCCTTAGACCGCTCGGCCAAACAACCACTTATTTGTTGAAAGCGAGCGCGGTACAAGTAATGTTACCTCATCTGATATACAATAAAGGTGGAGCGCCAATATATACGCATTTGACTGTTCATAATTCATTGAATATAATTTATTCCTTGTTAGTACAAAAGGGTTAAACAGAAAAAGACGTGACGTTGTAACCGAGAGGATG…	CGGTGTTTCACGGAATGGTACGTTTGATATCGCTGATTTGAGAGGAGGTTACACTTGAAGAATCACAGTCTTGCGA
5306	8869	0	209	0	4	NC_001139	857273	857825	NC_001144	457086	457349	|gene note= GO_component: cytosol [goid 0005829] [evidence NAS] |neigh_up CDS[fcd=-1243](-,855269,856306) gene= RNR4 note= Rnr4p; |neigh_down CDS[fcd=743](+,858292,858609) gene= TIM13 note= Tim13p;	|rRNA |rRNA note= GO_component: cytosolic small ribosomal subunit |neigh_up CDS[fcd=-2520](+,454697,455071) gene= TAR1 note= Tar1p; |neigh_down CDS[fcd=5455](-,462523,462672) note= Ylr154c-gp;	CGGTTCCCTTTCTTGCCTGAAATGCTCGTTCTAATGGAAAAAAAAAGAAATAAAGGTGGGCCTGCCCATTAGCAGGAAATTGGTACTTAATTATTGAAAAAAAAATTATTGGTTGCTAAGAGATTCGAACTCTTGCATCTTACGATACCTGAGTATTCCCACAGTTAACTGCGGTCAAGATATTTCTTGAATCAGGCGCCTTAGACCGCTCGGCCAAACAACCACTTATTTGTTGAAAGCGAGCGCGGTACAAGTAATGTTACCTCATCTGATATACAATAAAGGTGGAGCGCCAATATATACGCATTTGACTGTTCATAATTCATTGAATATAATTTATTCCTTGTTAGTACAAAAGGGTTAAACAGAAAAAGACGTGACGTTGTAACCGAGAGGATG…	CGGGCCCAAAGTTCAACTACGAGCTTTTTAACTGCAACAACTTTAATATACGCTATTGGAGCTGGAATTACCGCGGCTGCTGGCACCAGACTTGCCCTCCAATTGTTCCTCGTTAAGGTATTTACATTGTACTCATTCCAATTACAAGACCCGAATGGGCCCTGTATCGTTATTTATTGTCACTACCTCCCTGAATTAGGATTGGGTAATTTGCGCGCCTGCTGCCTTCCTTGGATGTGGTAGCCGTTTCTCAGGCTCCCTCT
[truncated: 586 more rows]

## Sheet: 5306-Unknown
This spreadsheet contains the output from the Topography program, it lists all of the interactions which were detected for the two mutant strains, yPH499 and yDP84 except that it has been filtered so that it is in the format of "ColumnA: 4C Bait fragment - Column B: Unknown interaction partner". The data is split into two categories by the Topography program, either the 4C product sequence tag al…
		Counts/Interaction Frequency
Interacting fragments		yPH499		yDP84		Fragment 1 coordinates			Fragment 2 coordinates			Annotation		Sequence		Fragment 2
[truncated: 466 more rows]

## Sheet: Adjacent and Self
This worksheet details interactions with adjacent sequences
		Counts										Annotation
[truncated: 16 more rows]

## Sheet: tRNA
This worksheet details interactions with fragments containing tRNAs
[truncated: 18 more rows]

[truncated: 2 more sheets: rDNA, TEL]
